# Supplementary material
Source: PubMed Central journal article supplement (PMC9881596)
Supplement: NIHMS1827536-supplement-Supporting_Information.pdf [file NIHMS1827536-supplement-Supporting_Information.pdf]

**Supplementary information**

---

**Combined radical and ionic approach for  
the enantioselective synthesis of  
 $\beta$ -functionalized amines from alcohols**

---

In the format provided by the  
authors and unedited

# Supplementary Information

## Combined radical and ionic approach for the enantioselective synthesis of $\beta$ -functionalized amines from alcohols

Kai Lang,<sup>1</sup> Yang Hu,<sup>2</sup> Wan-Chen Cindy Lee,<sup>1</sup> and X. Peter Zhang\*,<sup>1</sup>

<sup>1</sup> Department of Chemistry, Merkert Chemistry Center, Boston College, Chestnut Hill, Massachusetts 02467, United States

<sup>2</sup> Department of Chemistry, University of South Florida, Tampa, Florida 33620, United States

### **This PDF file includes:**

Materials and Methods

Supplementary Text

Table S1

Figures S1 to S6

## Table of Contents

|                                                                                                                                                                                                                                                                                                                                                              |    |
|--------------------------------------------------------------------------------------------------------------------------------------------------------------------------------------------------------------------------------------------------------------------------------------------------------------------------------------------------------------|----|
| <b>1. General Considerations</b> .....                                                                                                                                                                                                                                                                                                                       | 4  |
| 1.1. Figure S1. Select Examples of Biologically Important Molecules Containing Chiral Amine Motifs. ....                                                                                                                                                                                                                                                     | 5  |
| 1.2. Figure S2. Catalysts Surveyed for Ligand Effect on 1,5-C(sp <sup>3</sup> )-H Amination. ....                                                                                                                                                                                                                                                            | 6  |
| <b>2. General Procedure A: Synthesis of Alkoxy sulfonyl Azides</b> .....                                                                                                                                                                                                                                                                                     | 7  |
| 2.1. Synthesis and Characterization of Alkoxy sulfonyl Azides. ....                                                                                                                                                                                                                                                                                          | 8  |
| 2.2. TGA and DSC Result for <b>1a</b> .....                                                                                                                                                                                                                                                                                                                  | 19 |
| <b>3. General Procedure B: Intramolecular C-H Amination</b> .....                                                                                                                                                                                                                                                                                            | 20 |
| 3.1. Synthesis and Characterization of Sulfamidates .....                                                                                                                                                                                                                                                                                                    | 20 |
| 3.2. Figure S3. Ligand Effect (Open vs Bridged Catalysts) with Selected Substrates. ....                                                                                                                                                                                                                                                                     | 36 |
| <b>4. Mechanistic Studies on Co(II)-Catalyzed Radical 1,5-C-H Amination</b> .....                                                                                                                                                                                                                                                                            | 37 |
| 4.1. EPR Studies.....                                                                                                                                                                                                                                                                                                                                        | 37 |
| 4.1.1. Procedure for EPR Experiment .....                                                                                                                                                                                                                                                                                                                    | 37 |
| 4.1.2. Characterization of $\alpha$ -Co(III)-Aminyl Radical <b>I</b> and $\epsilon$ -Co(III)-Alkyl Radical <b>II</b> by EPR ...                                                                                                                                                                                                                              | 37 |
| 4.1.3. Figure S4. Experimental and Simulated X-Band EPR Spectra for $\alpha$ -Co(III)-Aminyl Radical <b>I</b> <sub>[Co(P14)]/1a</sub> and $\epsilon$ -Co(III)-Alkyl Radical <b>II</b> <sub>[Co(P14)]/1a</sub> in Benzene at RT .....                                                                                                                         | 38 |
| 4.2. HRMS Studies.....                                                                                                                                                                                                                                                                                                                                       | 39 |
| 4.2.1. Procedure for HRMS Studies.....                                                                                                                                                                                                                                                                                                                       | 39 |
| 4.2.2. Figure S5. Observed and Simulated DART-MS Spectra with Isotope Distribution (Corresponding to [ $\alpha$ -Co(III)-Aminyl Radical <b>I</b> <sub>[Co(P14)]/1a</sub> - e <sup>-1</sup> ] <sup>+</sup> and [ $\epsilon$ -Co(III)-Alkyl Radical <b>II</b> <sub>[Co(P14)]/1a</sub> - e <sup>-1</sup> ] <sup>+</sup> ([M] <sup>+</sup> m/z = 1662.4981)..... | 40 |
| 4.3. Kinetic Isotope Effect Experiment.....                                                                                                                                                                                                                                                                                                                  | 40 |
| 4.3.1. Synthesis and Characterization of Optically Pure Alkoxy sulfonyl Azides .....                                                                                                                                                                                                                                                                         | 40 |
| 4.3.2. Procedure for KIE Studies and Characterization .....                                                                                                                                                                                                                                                                                                  | 41 |
| 4.3.3. Table S1. Asymmetric Induction Mode Studies .....                                                                                                                                                                                                                                                                                                     | 42 |
| 4.4 Kinetics Studies.....                                                                                                                                                                                                                                                                                                                                    | 43 |
| 4.4.1 Procedure for Kinetics Studies.....                                                                                                                                                                                                                                                                                                                    | 43 |
| 4.4.2 Figure S6. Rate Plots of C-H Amination with [Co(P9)] and [Co(P14)].....                                                                                                                                                                                                                                                                                | 43 |
| <b>5. Synthesis of Chiral Amines</b> .....                                                                                                                                                                                                                                                                                                                   | 44 |

|                                                                                                                               |           |
|-------------------------------------------------------------------------------------------------------------------------------|-----------|
| 5.1. Ring-Opening by Carbon Nucleophiles .....                                                                                | 44        |
| 5.2. Ring-Opening by Nitrogen Nucleophiles.....                                                                               | 49        |
| 5.3. Ring-Opening by Oxygen, Fluorine, Phosphine and Sulfur Nucleophiles .....                                                | 54        |
| 5.4. Ring-Opening of $\alpha,\beta$ -Disubstituted Sulfamidates .....                                                         | 58        |
| 5.5. Synthesis of $\beta$ -Azido- $\alpha$ -Amine Derivatives .....                                                           | 59        |
| 5.6. Ring-Opening of Fused-Bicyclic Sulfamidates .....                                                                        | 61        |
| 5.7. Synthesis of 1,2,3-Trifunctionalized Cyclohexane Derivatives via Ring-Opening of<br>Cyclohexane-Fused Sulfamidates ..... | 63        |
| <b>6. X-ray Crystallography.....</b>                                                                                          | <b>69</b> |
| <b>7. References .....</b>                                                                                                    | <b>95</b> |
| <b>8. NMR Spectra, HPLC Traces and Cif-Check (X-ray) for Ligands, New Compounds.....</b>                                      | <b>96</b> |

## 1. General Considerations

All intramolecular C–H amination reactions were performed under nitrogen in oven-dried glassware following standard Schlenk techniques. Dichloromethane was distilled under nitrogen from calcium hydride. All cross-coupling reactions were carried out under a nitrogen atmosphere in oven-dried glassware following standard Schlenk techniques. Tetrahydrofuran (THF) and toluene were distilled under nitrogen from sodium benzophenone ketyl. Anhydrous cobalt(II) chloride, palladium(II) acetate, and 9-dimethyl-4,5-bis(diphenylphosphino)xanthenes (Xantphos) were purchased from Strem Chemical Inc. Cesium carbonate was obtained as a gift from Chemetall Chemical Products, Inc. Thin layer chromatography was performed on SorBent Technologies TLC plates (silica gel 60 F254). Flash column chromatography was performed with SorBent Technologies silica gel (60Å, 230-400 mesh, 32-63µm). <sup>1</sup>H NMR and <sup>13</sup>C NMR were recorded on Bruker 250, Inova400, Inova500, Inova600 instruments, and referenced with respect to internal TMS standard. Infrared spectra were measured with a Nicolet Avatar 320 spectrometer with a Smart Miracle accessory. HPLC measurements were carried out on a Shimadzu HPLC system with Chiralcel OD-H, OJ-H, AS-H, AD-H, IA and IC columns. HRMS data was obtained on an Agilent 1100 LC/MS ESI/TOF mass spectrometer with electrospray ionization. Optical rotations were recorded on Rudolph Research Analytical, Autopol<sup>®</sup> IV, Automatic Polarimeter.

**Notes on safety: Some azides could be explosive and should be handled carefully.** When common sense is employed, the azides can be prepared, stored, and used without risk in the standard organic chemistry laboratory.<sup>1</sup> Face shields, leather gloves, and protective leather clothing are highly recommended. For organic azides, the “rule of six” provides us with the guidance. Six carbons (or other atoms of about the same size) per energetic functional group (azide, diazo, nitro, etc.) should provide enough dilution to render the compound relatively safe to work with given appropriate controls and safety procedures.<sup>1</sup>

Although the C/N ratios<sup>2</sup> for most of the alkoxy sulfonyl azides synthesized in this work are >4 ( $(N_C+N_O)/N_N$  ( $N$  = number of atoms)), special attention needs to be paid when handling these type of compounds. The rotavap concentration for all azide synthesis was done at 0 °C behind a blast shield.

# 1.1. Figure S1. Select Examples of Biologically Important Molecules Containing Chiral Amine Motifs.

(~40–45% of marketed drug molecules contain chiral amine as core structures)

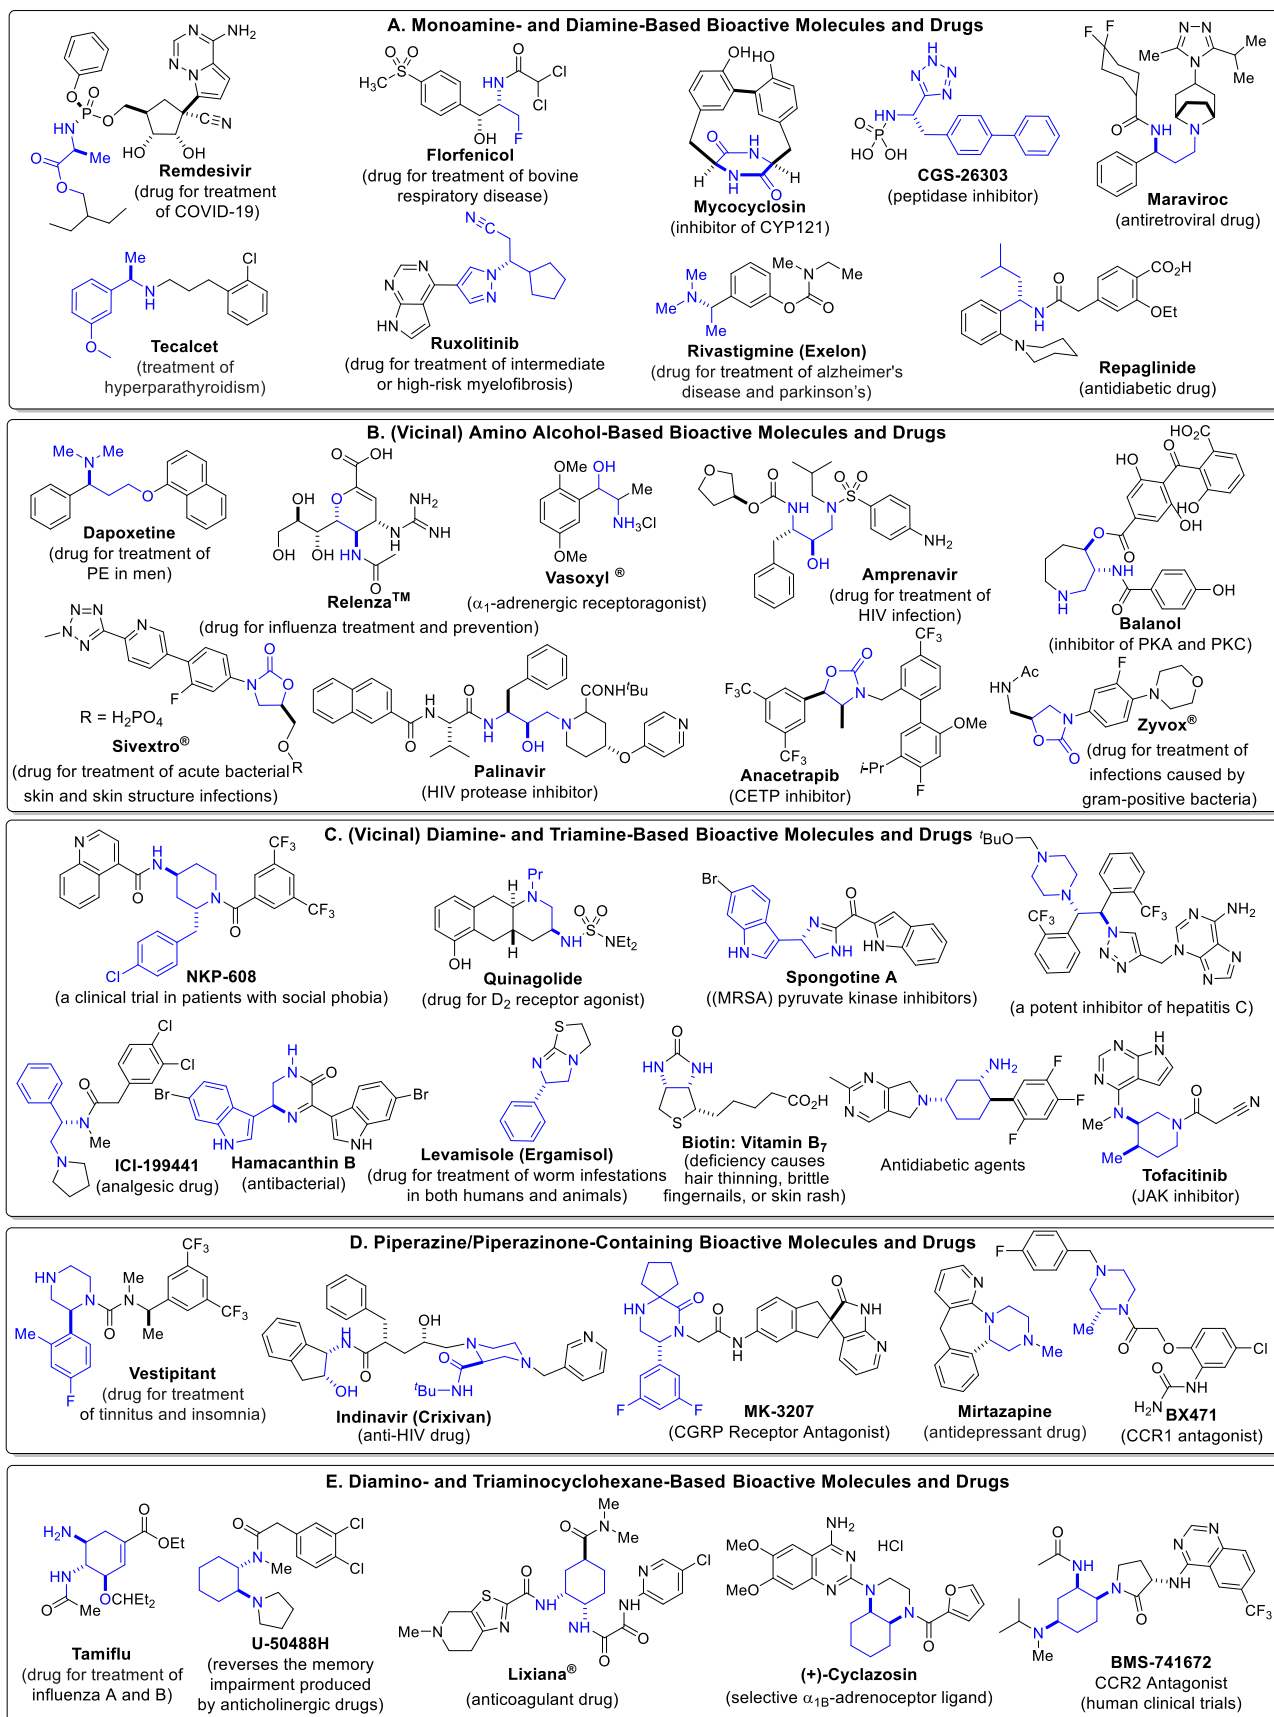

1.2. Figure S2. Catalysts Surveyed for Ligand Effect on 1,5-C(sp<sup>3</sup>)-H Amination.

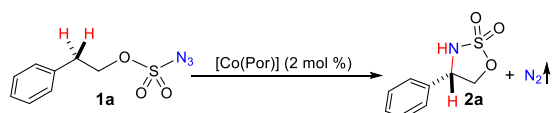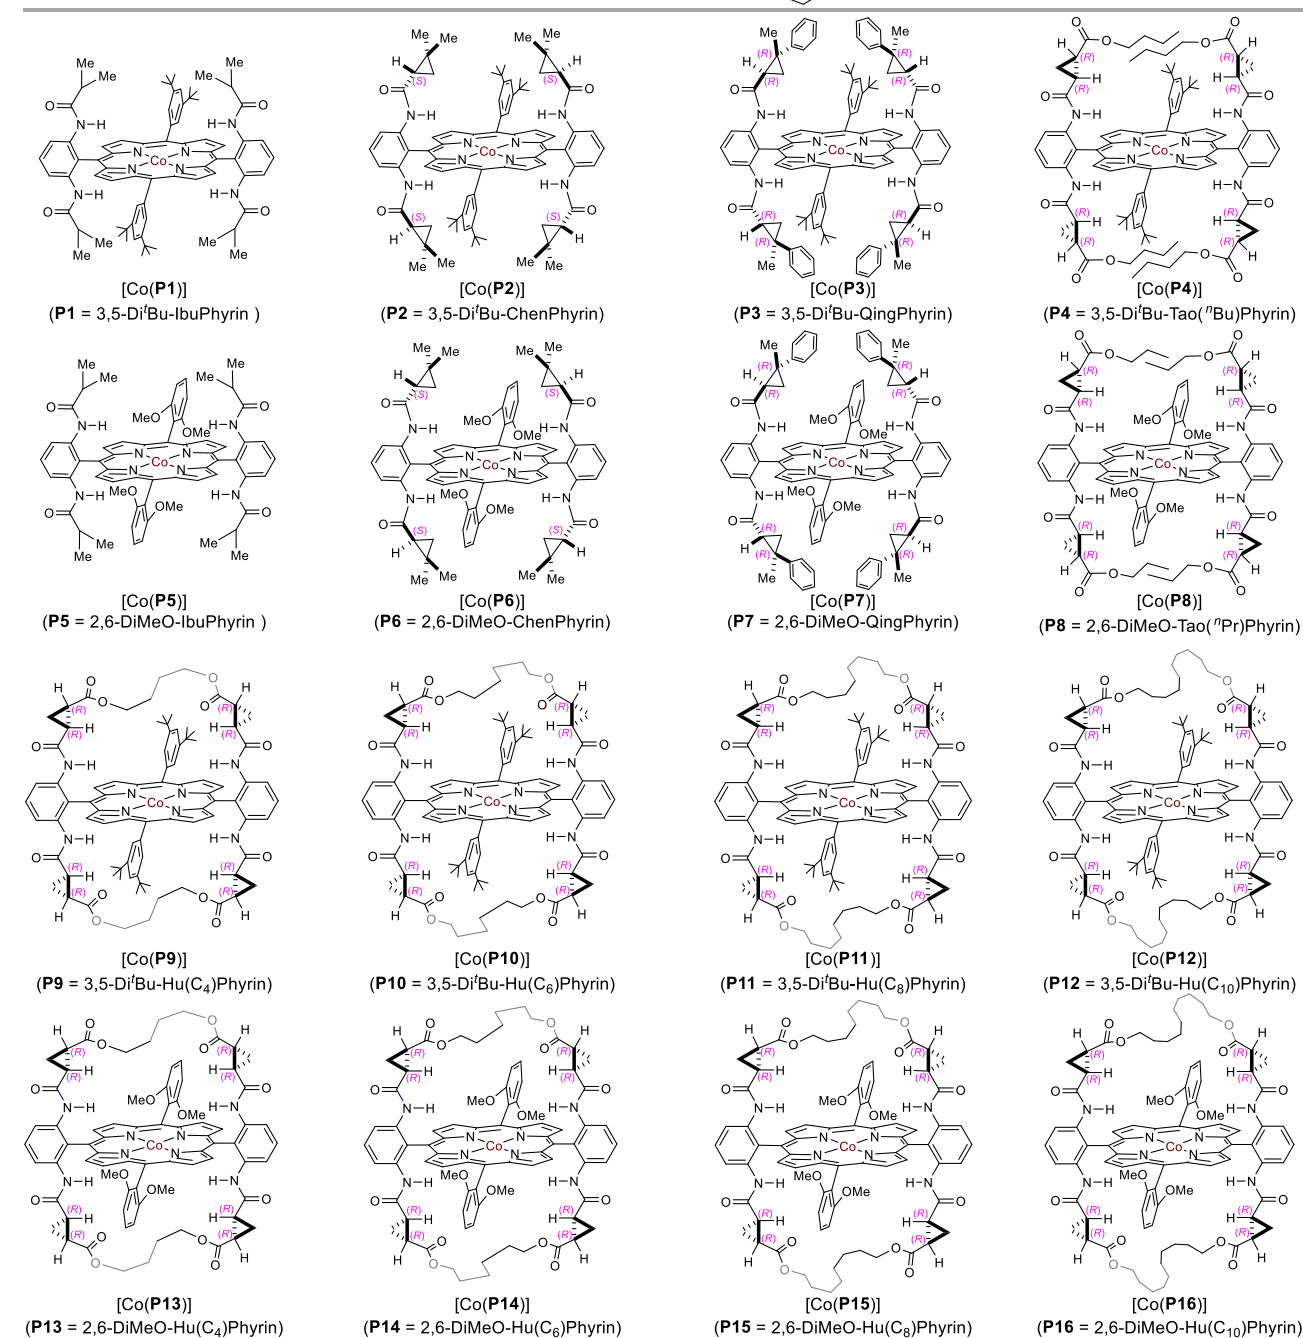

Synthesis and characterization of catalysts [Co(P1)], [Co(P2)], [Co(P3)], [Co(P4)], [Co(P5)], [Co(P6)], [Co(P7)], [Co(P8)], [Co(P9)], [Co(P10)], [Co(P11)], [Co(P12)], [Co(P13)], [Co(P14)], [Co(P15)] and [Co(P16)] can be found in our previously report and references therein.<sup>3,4</sup>

## 2. General Procedure A: Synthesis of Alkoxysulfonyl Azides

**Notes on safety.** Although no issues were encountered for alkoxysulfonyl azides throughout our research for this project, these azides are somewhat thermally unstable as suggested by TGA-DSC data in S19 (the onset of decomposition was approximately 134.7 °C for the azide **1a**). Face shields, leather gloves, and protective leather clothing are highly recommended. The solvent concentration via rotavap for all azide synthesis was done at 0 °C behind a blast shield.

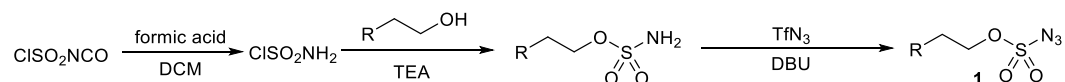

At 0 °C, formic acid (2.0 equiv) was added dropwise to a solution of chlorosulfonyl isocyanate (2.0 equiv) in DCM (2.5 M). Then reaction mixture was slowly warmed up to rt and stirred overnight. To this freshly made sulfamoyl chloride, a solution of starting alcohol (1.0 equiv) and triethyl amine (2.2 equiv) in DCM (2.5 M) was slowly added at 0 °C. The reaction was stirred at rt for another hour. Upon complete consumption of starting alcohol as monitored by TLC, the reaction was quenched with  $\text{H}_2\text{O}$ . The aqueous layer was then extracted with DCM (3 x 20 mL) and the organic layers were combined, dried, and concentrated. The residue was purified by flash silica gel chromatography (eluent: DCM:EtOAc 15:1) to give the desired sulfamate ester, which was used directly for next step.

**Procedure for Diazo-Transfer Reactions Using  $\text{TfN}_3$ .** To a solution of the above synthesized sulfamate ester (1.0 equiv) in DCM (0.25 M) was added DBU (1.5 equiv) and the reaction mixture was cooled to -78 °C. A solution of  $\text{TfN}_3$ <sup>5</sup> in hexanes (0.5 M, 1.5 equiv) was then added slowly and the reaction was monitored by TLC to completion (typically 5 min). The reaction mixture was then directly loaded into the silica gel column then purified by flash column chromatography (eluent was given below). The fractions containing product were collected and concentrated at 0 °C to afford the desired alkoxysulfonyl azides, which were stored immediately in a -20 °C freezer. **Note:** during column purification, the first 5-7 test tubes (~ 100 mL of Hexanes/EtOAc: 40:1) before the desired azides came out were collected separately due to the presence of unreacted  $\text{TfN}_3$ ; this part of solution was quenched as detailed in the following section.



**Procedure for Destruction of TfN<sub>3</sub>:** Dilute the solution containing TfN<sub>3</sub> in a 250 mL round bottom flask with 50 mL THF assuming the full amount used still remains (1.0 equiv). A solution of triphenylphosphine (1.5 equiv, 50 mol % excess) in a 20 mL of THF is added slowly with stirring. The mixture is allowed to stand at room temperature for 24 hours or until complete consumption of the azide. The quenched mixture can then be worked up as usual or be disposed in an appropriate organic waste stream.

The following alternative procedure is highly recommended for the end users due to the use of much safer FSO<sub>2</sub>N<sub>3</sub><sup>6</sup> as diazotransfer reagent.

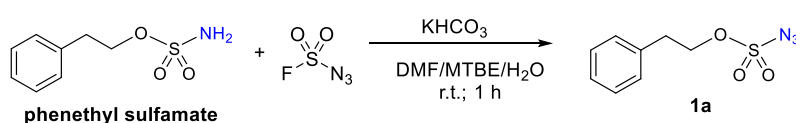

**Procedure for Diazo-Transfer Reactions Using FSO<sub>2</sub>N<sub>3</sub>.** Taking the synthesis of **phenethyl sulfazidate (1a)** as an example, to a round-bottom flask was added sequentially above synthesized **phenethyl sulfamate** (1.0 mmol) and FSO<sub>2</sub>N<sub>3</sub> (5 mL, 1.0 mmol, 1.0 equiv, 0.2 M in MTBE), diluted with equal volume of DMF and followed by the addition of aqueous KHCO<sub>3</sub> solution (1.3 mL, 4.0 mmol, 4.0 equiv, 3.0 M in H<sub>2</sub>O). The reaction mixture was stirred for 1 hour at room temperature. After completion, EtOAc (40 mL) was added and the mixture was washed sequentially with brine (60 mL × 6), water (60 mL × 2) and brine (60 mL), dried over Na<sub>2</sub>SO<sub>4</sub>, concentrated by rotary evaporation. The residue was then loaded into the silica gel column and purified by flash column chromatography (eluent: 20:1 Hexanes/EtOAc), TLC R<sub>f</sub> = 0.65 (20:1 Hexanes/EtOAc). The fractions containing product were collected and concentrated at 0 °C to afford the desired alkoxy sulfonyl azides **1a** as colorless oil in 90% yield (204 mg), which were stored immediately in a -20 °C freezer.

## 2.1. Synthesis and Characterization of Alkoxy sulfonyl Azides

**Phenethyl sulfazidate (1a)** was synthesized following General Procedure A, from 2.4 mmol of the 2-phenethyl-1-ethanol (commercially available, cas: 60-12-8) and purified by flash silica gel chromatography (eluent: 40: 1 hexanes/EtOAc), TLC R<sub>f</sub> = 0.65 (20:1 Hexanes/EtOAc) to afford 408 mg of desired product as a colorless oil (75% yield). <sup>1</sup>H NMR (600 MHz,

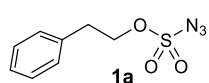

$C_6D_6$ )  $\delta$  ppm 7.07- 6.91 (m, 3H), 6.76 (d,  $J = 7.0$  Hz, 2H), 3.92 (t,  $J = 6.8$  Hz, 2H), 2.38 (t,  $J = 6.8$  Hz, 2H);  $^{13}C$  NMR (150 MHz,  $CDCl_3$ )  $\delta$  ppm 135.5, 129.1, 129.0, 127.5, 75.0, 35.2; IR (neat,  $cm^{-1}$ ): 2143, 1403, 1183.

**4-(*tert*-Butyl)phenethyl sulfazidate (1b)** was synthesized following General Procedure A, from 1.0

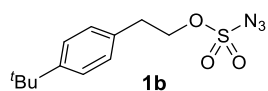

mmol of the 2-(4-(*tert*-butyl)phenyl)ethan-1-ol (commercially available, cas: 5406-86-0) and purified by flash silica gel chromatography (eluent: 40: 1

Hexanes/EtOAc), TLC  $R_f = 0.70$  (20:1 Hexanes/EtOAc) to afford 250 mg of desired product as a colorless oil (88% yield).  $^1H$  NMR (400 MHz,  $CDCl_3$ )  $\delta$  ppm 7.36 (dd,  $J = 8.2, 1.8$  Hz, 2H), 7.17 (dd,  $J = 8.2, 1.7$  Hz, 2H), 4.54 (td,  $J = 6.9, 1.4$  Hz, 2H), 3.07 (t,  $J = 6.9$  Hz, 2H), 1.28 (s, 9H);  $^{13}C$  NMR (100 MHz,  $CDCl_3$ )  $\delta$  ppm 150.3, 132.2, 128.6, 125.8, 77.2, 74.9, 34.5, 31.3; IR(neat,  $cm^{-1}$ ): 2135, 1400, 1185.

**4-Methoxyphenethyl sulfazidate (1c)** was synthesized following General Procedure A, from 2.6 mmol

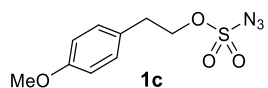

of the 2-(4-methoxyphenyl)ethan-1-ol (commercially available, cas: 702-23-8) and purified by flash silica gel chromatography (eluent: 40: 1 Hexanes/EtOAc),

TLC  $R_f = 0.55$  (10:1 Hexanes/EtOAc) to afford 436 mg of desired product as a colorless oil (65% yield).  $^1H$  NMR (250 MHz,  $CDCl_3$ )  $\delta$  ppm 7.16 (d,  $J = 8.8$  Hz, 2H), 6.88 (d,  $J = 8.8$  Hz, 2H), 4.51 (t,  $J = 6.8$  Hz, 2H), 3.80 (s, 3H), 3.05 (t,  $J = 6.8$  Hz, 2H);  $^{13}C$  NMR (150 MHz,  $CDCl_3$ )  $\delta$  ppm 159.0, 130.1, 127.4, 114.4, 75.2, 55.4, 34.4; IR (neat,  $cm^{-1}$ ): 2133, 1402, 1183.

**3-Methoxyphenethyl sulfazidate (1d)** was synthesized following General Procedure A, from 1.1 mmol

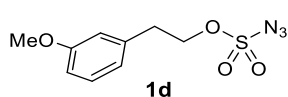

of the 2-(3-methoxyphenyl)ethan-1-ol (commercially available, cas: 5020-41-7) and purified by flash silica gel chromatography (eluent: 40: 1

Hexanes/EtOAc), TLC  $R_f = 0.50$  (20:1 Hexanes/EtOAc) to afford 231 mg of desired product as a colorless oil (80% yield).  $^1H$  NMR (400 MHz,  $CDCl_3$ )  $\delta$  ppm 7.29-7.24 (m, 1H), 6.85-6.80 (m, 2H), 6.78 (d,  $J = 1.8$  Hz, 1H), 4.55 (t,  $J = 6.9$  Hz, 2H), 3.80 (s, 3H), 3.08 (t,  $J = 6.9$  Hz, 2H);  $^{13}C$  NMR (100 MHz,  $CDCl_3$ )  $\delta$  ppm 159.9, 136.9, 129.9, 121.1, 114.8, 112.6, 74.8, 55.2, 35.0; IR (neat,  $cm^{-1}$ ): 2134, 1401, 1183.

**4-Nitrophenethyl sulfazidate (1e)** was synthesized following General Procedure A, from 1.0 mmol of

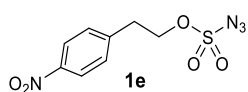

the 2-(4-nitrophenyl)ethan-1-ol (commercially available, cas: 100-27-6) and purified by flash silica gel chromatography (eluent: 40: 1 Hexanes/EtOAc), TLC

$R_f = 0.50$  (20:1 Hexanes/EtOAc) to afford 200 mg of desired product as an off-white solid (72% yield).

$^1\text{H NMR}$  (500 MHz,  $\text{C}_6\text{D}_6$ )  $\delta$  7.76-7.70 (m, 2H), 6.43-6.36 (m, 2H), 3.74 (t,  $J = 6.5$  Hz, 2H), 2.14 (t,  $J = 6.5$  Hz, 2H);  $^{13}\text{C NMR}$  (150 MHz,  $\text{CDCl}_3$ )  $\delta$  ppm 147.5, 143.2, 130.0, 124.2, 73.7, 35.0; IR (neat,  $\text{cm}^{-1}$ ): 2147, 1519, 1403, 1346, 1183.

**4-(Trifluoromethyl)phenethyl sulfazidate (1f)** was synthesized following General Procedure A, from

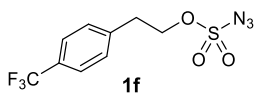

1.0 mmol of the 2-(4-(trifluoromethyl)phenyl)ethan-1-ol (commercially available, cas: 2968-93-6) and purified by flash silica gel chromatography

(eluent: 40: 1 Hexanes/EtOAc), TLC  $R_f = 0.60$  (20:1 Hexanes/EtOAc) to afford 250 mg of desired

product as a colorless oil (85% yield).  $^1\text{H NMR}$  (400 MHz,  $\text{CDCl}_3$ )  $\delta$  ppm 7.60 (d,  $J = 8.0$  Hz, 2H), 7.36

(d,  $J = 8.0$  Hz, 2H), 4.57 (t,  $J = 6.6$  Hz, 2H), 3.16 (t,  $J = 6.6$  Hz, 2H);  $^{13}\text{C NMR}$  (100 MHz,  $\text{CDCl}_3$ )  $\delta$

ppm 139.6, 129.7 (q,  $J = 32$  Hz), 129.3, 125.7 (q,  $J = 4.0$  Hz), 124.0 (q,  $J = 271$  Hz), 74.0, 34.8;  $^{19}\text{F}$

NMR (376 MHz,  $\text{CDCl}_3$ )  $\delta$  ppm -62.7; IR (neat,  $\text{cm}^{-1}$ ): 2135, 1401, 1185.

**4-Chlorophenethyl sulfazidate (1g)** was synthesized following General Procedure A, from 1.24 mmol

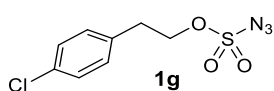

of the 2-(4-chlorophenyl)ethan-1-ol (commercially available, cas: 1875-88-3)

and purified by flash silica gel chromatography (eluent: 40: 1 Hexanes/EtOAc),

TLC  $R_f = 0.62$  (20:1 Hexanes/EtOAc) to afford 260 mg of desired product as a colorless oil (80% yield).

$^1\text{H NMR}$  (250 MHz,  $\text{CDCl}_3$ )  $\delta$  ppm 7.35 (d,  $J = 8.5$  Hz, 2H), 7.21 (d,  $J = 8.6$  Hz, 2H), 4.56 (t,  $J = 6.7$

Hz, 2H), 3.11 (t,  $J = 6.7$  Hz, 2H);  $^{13}\text{C NMR}$  (62.5 MHz,  $\text{CDCl}_3$ )  $\delta$  ppm 133.9, 133.3, 130.3, 129.0, 74.4,

34.4; IR (neat,  $\text{cm}^{-1}$ ): 2137, 1400, 1180.

**4-Bromophenethyl sulfazidate (1h)** was synthesized following General Procedure A, from 0.93 mmol

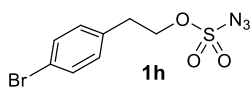

of the 2-(4-bromophenyl)ethan-1-ol (commercially available, cas: 4654-39-1) and

purified by flash silica gel chromatography (eluent: 40: 1 Hexanes/EtOAc), TLC

$R_f = 0.65$  (20:1 Hexanes/EtOAc) to afford 230 mg of desired product as a colorless oil (82% yield).  $^1\text{H}$

NMR (400 MHz, CDCl<sub>3</sub>)  $\delta$  ppm 7.48 (d,  $J$  = 8.3 Hz, 2H), 7.12 (d,  $J$  = 8.2 Hz, 2H), 4.53 (t,  $J$  = 6.7 Hz, 2H), 3.07 (t,  $J$  = 6.7 Hz, 2H); <sup>13</sup>C NMR (62.5 MHz, CDCl<sub>3</sub>)  $\delta$  ppm 134.6, 132.0, 130.7, 121.3, 74.4, 34.5; IR (neat, cm<sup>-1</sup>): 2147, 1401, 1184.

**3-Bromophenethyl sulfazidate (1i)** was synthesized following General Procedure A, from 1.4 mmol

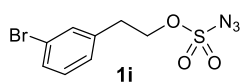

3-bromobenzeneethanol (commercially available, cas: 28229-69-8) and purified by flash silica gel chromatography (eluent: 20: 1 Hexanes/EtOAc), TLC  $R_f$  = 0.40

(10:1 Hexanes/EtOAc) to afford 390 mg of desired product as a colorless oil (89% yield). <sup>1</sup>H NMR (600 MHz, CDCl<sub>3</sub>)  $\delta$  ppm 7.44-7.41 (m, 1H), 7.40 (t,  $J$  = 1.7 Hz, 1H), 7.24-7.20 (m, 1H), 7.20-7.16 (m, 1H), 4.54 (t,  $J$  = 6.8 Hz, 2H), 3.08 (t,  $J$  = 6.8 Hz, 2H); <sup>13</sup>C NMR (150 MHz, CDCl<sub>3</sub>)  $\delta$  ppm 137.8, 132.1, 130.7, 130.6, 127.7, 123.0, 74.3, 34.8; IR (neat, cm<sup>-1</sup>): 2144, 1405, 1186, 956, 625.

**2-(Furan-2-yl)ethyl sulfazidate (1j)** was synthesized following General Procedure A, from 2.2 mmol

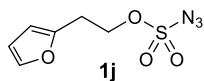

of the 2-(furan-2-yl)ethan-1-ol (commercially available, cas: 35942-95-1) and purified by flash silica gel chromatography (eluent: 40: 1 Hexanes/EtOAc), TLC  $R_f$

= 0.65 (20:1 Hexanes/EtOAc) to afford 360 mg of desired product as a colorless oil (75% yield). <sup>1</sup>H NMR (400 MHz, CDCl<sub>3</sub>)  $\delta$  ppm 7.35 (d,  $J$  = 1.8 Hz, 1H), 6.31 (dd,  $J$  = 3.2, 1.9 Hz, 1H), 6.17 (d,  $J$  = 3.2 Hz, 1H), 4.57 (t,  $J$  = 6.6 Hz, 2H), 3.13 (t,  $J$  = 6.5 Hz, 2H); <sup>13</sup>C NMR (100 MHz, CDCl<sub>3</sub>)  $\delta$  ppm 149.2, 142.1, 110.5, 107.6, 72.1, 27.8; IR (neat, cm<sup>-1</sup>): 2133, 1401, 1185.

**2-(Thiophen-2-yl)ethyl sulfazidate (1k)** was synthesized following General Procedure A, from 2.08

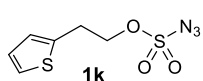

mmol of the 2-(thiophen-2-yl)ethan-1-ol (commercially available, cas: 5402-55-1) and purified by flash silica gel chromatography (eluent: 40: 1 Hexanes/EtOAc), TLC  $R_f$  =

0.65 (20:1 Hexanes/EtOAc) to afford 420 mg of desired product as a colorless oil (86% yield). <sup>1</sup>H NMR (250 MHz, CDCl<sub>3</sub>)  $\delta$  ppm 7.32-7.21 (m, 1H), 7.08-6.91 (m, 2H), 4.58 (t,  $J$  = 6.6 Hz, 2H), 3.36 (t,  $J$  = 6.6 Hz, 2H); <sup>13</sup>C NMR (62.5 MHz, CDCl<sub>3</sub>)  $\delta$  ppm 137.1, 127.3, 126.6, 124.9, 74.3, 29.3; IR (neat, cm<sup>-1</sup>): 2135, 1405, 1185.

**2-(2,3-Dihydrobenzofuran-5-yl)ethyl sulfurazidate (1l)** was synthesized following General

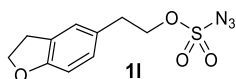

Procedure A, from 2.1 mmol 2-(2,3-dihydrobenzofuran-5-yl)ethan-1-ol (commercially available, cas: 87776-76-9) and purified by flash silica gel chromatography (eluent: 16: 1 Hexanes/EtOAc), TLC  $R_f$  = 0.30 (8:1 Hexanes/EtOAc) to afford 300 mg of desired product as a colorless oil (54% yield).  $^1\text{H}$  NMR (600 MHz,  $\text{CDCl}_3$ )  $\delta$  ppm 7.06 (s, 1H), 6.98-6.94 (m, 1H), 6.75 (d,  $J$  = 8.1 Hz, 1H), 4.57 (t,  $J$  = 8.7 Hz, 2H), 4.50 (t,  $J$  = 7.0 Hz, 2H), 3.20 (t,  $J$  = 8.7 Hz, 2H), 3.03 (t,  $J$  = 7.0 Hz, 2H);  $^{13}\text{C}$  NMR (150 MHz,  $\text{CDCl}_3$ )  $\delta$  ppm 159.6, 128.7, 127.9, 127.2, 125.7, 109.6, 75.5, 71.5, 34.7, 29.8; IR (neat,  $\text{cm}^{-1}$ ): 2143, 1492, 1401, 1181, 938, 623.

**2-(Benzo[b]thiophen-4-yl)ethyl sulfurazidate (1m)** was synthesized following General Procedure A,

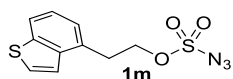

from 1.4 mmol benzo[b]thiophene-4-ethanol (commercially available, cas: 227809-74-7) and purified by flash silica gel chromatography (eluent: 20: 1 Hexanes/EtOAc), TLC  $R_f$  = 0.70 (20:1 Hexanes/EtOAc) to afford 320 mg of desired product as a colorless oil (80% yield).  $^1\text{H}$  NMR (600 MHz,  $\text{CDCl}_3$ )  $\delta$  ppm 7.83 (d,  $J$  = 8.1 Hz, 1H), 7.53 (d,  $J$  = 5.5 Hz, 1H), 7.42 (d,  $J$  = 5.5 Hz, 1H), 7.32 (t,  $J$  = 7.6 Hz, 1H), 7.23 (d,  $J$  = 7.2 Hz, 1H), 4.64 (t,  $J$  = 7.1 Hz, 2H), 3.46 (t,  $J$  = 7.2 Hz, 2H);  $^{13}\text{C}$  NMR (150 MHz,  $\text{CDCl}_3$ )  $\delta$  ppm 140.6, 138.8, 130.0, 127.4, 125.1, 124.6, 122.1, 121.1, 74.3, 33.4; IR (neat,  $\text{cm}^{-1}$ ): 2143, 1402, 1185, 951, 760.

**tert-Butyl 3-(2-((azidosulfonyl)oxy)ethyl)-1H-indole-1-carboxylate (1n)** was synthesized following

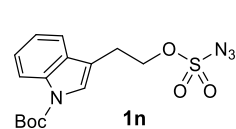

General Procedure A, from 1.02 mmol of the *tert*-butyl 3-(2-hydroxyethyl)-1H-indole-1-carboxylate (commercially available, cas: 141972-32-9) and purified by flash silica gel chromatography (eluent: 40: 1 Hexanes/EtOAc), TLC  $R_f$  = 0.45 (20:1 Hexanes/EtOAc) to afford 300 mg of desired product as a colorless oil (80% yield).  $^1\text{H}$  NMR (400 MHz,  $\text{CDCl}_3$ )  $\delta$  ppm 8.14 (d,  $J$  = 7.8 Hz, 1H), 7.38-7.31 (m, 1H), 7.29-7.25 (m, 1H), 7.51 (d,  $J$  = 8.3 Hz, 2H), 4.61 (t,  $J$  = 6.4 Hz, 2H), 3.21 (t,  $J$  = 6.4 Hz, 2H), 1.66 (s, 9H);  $^{13}\text{C}$  NMR (100 MHz,  $\text{CDCl}_3$ )  $\delta$  ppm 149.5, 135.5, 129.7, 124.8, 124.1, 122.8, 118.5, 115.5, 114.3, 84.0, 73.5, 28.2, 24.8; IR (neat,  $\text{cm}^{-1}$ ): 2135, 1675, 1405, 1180.

**(E)-4-phenylbut-3-en-1-yl sulfazidate (1o)** was synthesized following General Procedure A, from 1.69

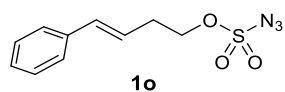

mmol of the (*E*)-4-phenylbut-3-en-1-ol (commercially available, cas: 770-36-5) and purified by flash silica gel chromatography (eluent: 40: 1 Hexanes/EtOAc), TLC  $R_f = 0.78$  (20:1 Hexanes/EtOAc) to afford 310 mg of desired product as a colorless oil (70% yield).  $^1\text{H NMR}$  (600 MHz,  $\text{CDCl}_3$ )  $\delta$  ppm 7.39-7.29 (m, 4H), 7.28-7.24 (m, 1H), 6.55 (d,  $J = 15.9$  Hz, 1H), 6.19-6.09 (m, 1H), 4.47 (t,  $J = 6.6$  Hz, 2H), 2.79- 2.66 (m, 2H);  $^{13}\text{C NMR}$  (62.5 MHz,  $\text{CDCl}_3$ )  $\delta$  ppm 136.7, 134.2, 128.7, 127.8, 126.3, 122.8, 74.1, 32.3; IR (neat,  $\text{cm}^{-1}$ ) 2143, 1403, 1184.

**(E)-Hex-3-en-1-yl sulfazidate (1p)** was synthesized following General Procedure A, from 2.0 mmol of

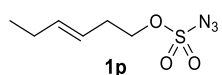

the (*E*)-hex-3-en-1-ol (commercially available, cas: 928-97-2) and purified by flash silica gel chromatography (eluent: 40: 1 Hexanes/EtOAc), TLC  $R_f = 0.75$  (20:1 Hexanes/EtOAc) to afford 340 mg of desired product as a colorless oil (83% yield).  $^1\text{H NMR}$  (400 MHz,  $\text{CDCl}_3$ )  $\delta$  ppm 5.75-5.58 (m, 1H), 5.35 (tdd,  $J = 13.7, 4.9, 3.4$  Hz, 1H), 4.35 (t,  $J = 6.7$  Hz, 2H), 2.49 (q,  $J = 6.8$  Hz, 2H), 2.04 (p,  $J = 6.5$  Hz, 2H), 0.98 (t,  $J = 7.4$  Hz, 3H);  $^{13}\text{C NMR}$  (100 MHz,  $\text{CDCl}_3$ )  $\delta$  ppm 137.1, 121.6, 74.5, 31.8, 25.6, 13.5; IR (neat,  $\text{cm}^{-1}$ ) 2137, 1401, 1185.

**But-3-en-1-yl sulfazidate (2q)** was synthesized following General Procedure A, from 2.0 mmol of the

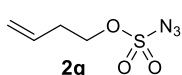

but-3-en-1-ol (commercially available, cas: 627-27-0) and purified by flash silica gel chromatography (eluent: 40: 1 Hexanes/EtOAc), TLC  $R_f = 0.75$  (20:1 Hexanes/EtOAc) to afford 344 mg of desired product as a colorless oil (97% yield).  $^1\text{H NMR}$  (400 MHz,  $\text{CDCl}_3$ )  $\delta$  ppm 5.85-5.72 (m, 1H), 5.24-5.19 (m, 2H), 4.41 (t,  $J = 6.4$  Hz, 2H), 2.56 (q,  $J = 6.6$  Hz, 2H);  $^{13}\text{C NMR}$  (100 MHz,  $\text{CDCl}_3$ )  $\delta$  ppm 131.7, 119.3, 74.0, 33.1; IR (neat,  $\text{cm}^{-1}$ ) 2135, 1404, 1185.

**4-phenylbut-3-yn-1-yl sulfazidate (1r)** was synthesized following General Procedure A, from 2.0

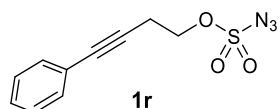

mmol of the 4-phenylbut-3-yn-1-ol (commercially available, cas: 10229-11-5) and purified by flash silica gel chromatography (eluent: 40: 1 Hexanes/EtOAc), TLC  $R_f = 0.78$  (20:1 Hexanes/EtOAc) to afford 400 mg of desired product as a colorless oil (80% yield).

$^1\text{H}$  NMR (400 MHz,  $\text{CDCl}_3$ )  $\delta$  ppm 7.50-7.36 (m, 2H), 7.32-7.28 (m, 3H), 4.49 (t,  $J = 6.7$  Hz, 2H), 2.92 (t,  $J = 6.7$  Hz, 2H);  $^{13}\text{C}$  NMR (100 MHz,  $\text{CDCl}_3$ )  $\delta$  ppm 131.6, 128.4, 128.3, 122.6, 83.2, 82.8, 71.9, 20.2; IR (neat,  $\text{cm}^{-1}$ ) 2180, 2117, 1410, 1194.

**4-(Triisopropylsilyl)but-3-yn-1-yl sulfazidate (1s)** was synthesized following General Procedure A,

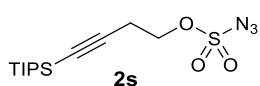

from 1.05 mmol of the 4-(triisopropylsilyl)but-3-yn-1-ol<sup>7</sup> and purified by flash silica gel chromatography (eluent: 40: 1 Hexanes/EtOAc), TLC  $R_f = 0.88$  (20:1

Hexanes/EtOAc) to afford 315 mg of desired product as a colorless oil (91% yield).  $^1\text{H}$  NMR (400 MHz,  $\text{CDCl}_3$ )  $\delta$  ppm 4.41 (t,  $J = 6.9$  Hz, 2H), 2.77 (t,  $J = 6.9$  Hz, 2H), 1.07-0.99 (m, 21H);  $^{13}\text{C}$  NMR (100 MHz,  $\text{CDCl}_3$ )  $\delta$  ppm 100.8, 84.4, 72.0, 20.6, 18.5, 11.1; IR (neat,  $\text{cm}^{-1}$ ) 2174, 2115, 1412, 1187.

**1,3-Diphenylpropan-2-yl sulfurazidate (1t)** was synthesized following General Procedure A, from 2.0

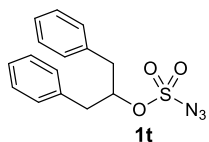

mmol of the 1,3-diphenyl-2-propanol (commercially available, cas: 5381-92-0) and purified by flash silica gel chromatography (eluent: 20: 1 Hexanes/EtOAc), TLC  $R_f = 0.60$  (10:1 Hexanes/EtOAc) to afford 470 mg of desired product as a colorless oil

(74% yield).  $^1\text{H}$  NMR (600 MHz,  $\text{CDCl}_3$ )  $\delta$  ppm 7.34 (dd,  $J = 10.4, 4.4$  Hz, 4H), 7.28 (t,  $J = 7.4$  Hz, 2H), 7.22 (d,  $J = 7.1$  Hz, 4H), 5.14-4.96 (m, 1H), 3.08 (dd,  $J = 14.3, 7.0$  Hz, 2H), 3.04 (dd,  $J = 14.3, 5.9$  Hz, 2H);  $^{13}\text{C}$  NMR (150 MHz,  $\text{CDCl}_3$ )  $\delta$  ppm 135.7, 129.7, 129.0, 127.5, 89.8, 40.5; IR (neat,  $\text{cm}^{-1}$ ): 2145, 1190.

**1,3-Di(furan-2-yl)propan-2-yl sulfurazidate (1u)** was synthesized following General Procedure A,

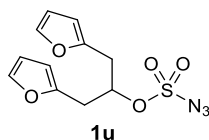

from 0.9 mmol of the 1,3-di(furan-2-yl)propan-2-ol, which was prepared from 1,3-di-2-furanyl-2-propanone<sup>8</sup> through  $\text{NaBH}_4$  reduction and purified by flash silica gel chromatography (eluent: 15: 1 Hexanes/EtOAc), TLC  $R_f = 0.52$  (8:1

Hexanes/EtOAc) to afford 180 mg of desired product as a colorless oil (65% yield).  $^1\text{H}$  NMR (600 MHz,  $\text{CDCl}_3$ )  $\delta$  ppm 7.39 (d,  $J = 1.0$  Hz, 2H), 6.34 (dd,  $J = 2.8, 1.8$  Hz, 2H), 6.22 (d,  $J = 2.9$  Hz, 2H), 5.16 (p,  $J = 6.1$  Hz, 1H), 3.14 (dd,  $J = 15.5, 5.7$  Hz, 2H), 3.10 (dd,  $J = 15.5, 6.5$  Hz, 2H);  $^{13}\text{C}$  NMR (150 MHz,

CDCl<sub>3</sub>)  $\delta$  ppm 149.2, 142.5, 110.8, 108.8, 84.1, 32.7; IR (neat, cm<sup>-1</sup>): 2980, 2145, 1405, 1187, 903, 723, 624.

**2-Allylpent-4-en-1-yl sulfurazidate (1v)** was synthesized following General Procedure A, from 1.0

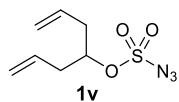

mmol of the 1,6-heptadien-4-ol (commercially available, cas: 2883-45-6) and purified by flash silica gel chromatography (eluent: 20: 1 Hexanes/EtOAc), TLC R<sub>f</sub> = 0.42 (10:1

Hexanes/EtOAc) to afford 220 mg of desired product as a colorless oil (95% yield). <sup>1</sup>H NMR (600 MHz, CDCl<sub>3</sub>)  $\delta$  ppm 5.79 (ddt, *J* = 17.3, 10.5, 7.1 Hz, 2H), 5.24-5.19 (m, 4H), 4.79 (p, *J* = 6.1 Hz, 1H), 2.61-2.48 (m, 4H); <sup>13</sup>C NMR (150 MHz, CDCl<sub>3</sub>)  $\delta$  ppm 131.4, 120.0, 87.4, 38.2; IR (neat, cm<sup>-1</sup>): 2142, 1738, 1186.

**1,7-Bis(trimethylsilyl)hepta-1,6-diyn-4-yl sulfurazidate (1w)** was synthesized following General

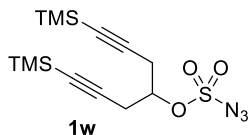

Procedure A, from 1.1 mmol 1,7-bis(trimethylsilyl)hepta-1,6-diyn-4-ol<sup>9</sup> and purified by flash silica gel chromatography (eluent: 40: 1 Hexanes/EtOAc), TLC R<sub>f</sub> = 0.40 (40:1 Hexanes/EtOAc) to afford 300 mg of desired product as a colorless

oil (79% yield). <sup>1</sup>H NMR (600 MHz, CDCl<sub>3</sub>)  $\delta$  ppm 4.82 (p, *J* = 5.8 Hz, 1H), 2.86 (dd, *J* = 17.3, 5.9 Hz, 2H), 2.80 (dd, *J* = 17.4, 5.7 Hz, 2H), 0.17 (s, 18H); <sup>13</sup>C NMR (150 MHz, CDCl<sub>3</sub>)  $\delta$  ppm 99.1, 89.2, 82.6, 25.1, 0.0; IR (neat, cm<sup>-1</sup>): 2960, 2182, 2144, 1410, 1191, 840.

**2,3-Dihydro-1H-inden-2-yl sulfazidate (1x)** was synthesized following General Procedure A, from 1.0

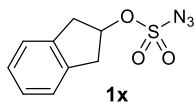

mmol of the 2,3-dihydro-1H-inden-2-ol (commercially available, cas: 4254-29-9) and purified by flash silica gel chromatography (eluent: 40: 1 Hexanes/EtOAc), TLC R<sub>f</sub>

= 0.75 (20:1 Hexanes/EtOAc) to afford 198 mg of desired product as a colorless oil (83% yield). <sup>1</sup>H NMR (600 MHz, C<sub>6</sub>D<sub>6</sub>)  $\delta$  ppm 6.95 (dd, *J* = 5.4, 3.2 Hz, 2H), 6.84-6.79 (m, 2H), 4.93 (dt, *J* = 9.0, 3.0 Hz, 1H), 2.81 (dd, *J* = 17.2, 2.6 Hz, 2H), 2.59 (dd, *J* = 17.2, 6.0 Hz, 2H); <sup>13</sup>C NMR (100 MHz, CDCl<sub>3</sub>)  $\delta$  ppm 138.5, 127.5, 124.7, 88.2, 39.7; IR (neat, cm<sup>-1</sup>) 2145, 1404, 1178.



**Cyclopent-3-en-1-yl sulfurazidate (1y)** was synthesized following General Procedure A, from 2.0

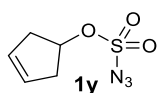

mmol of 3-cyclopenten-1-ol (commercially available, cas: 14320-38-8) and purified by flash silica gel chromatography (eluent: 20: 1 Hexanes/EtOAc), TLC  $R_f = 0.50$  (20:1 Hexanes/EtOAc) to afford 300 mg of desired product as a colorless oil (79% yield). (**Note: compound is not stable under neat condition at room temperature but it is stable at 0 °C under neat condition.**)  $^1\text{H NMR}$  (500 MHz,  $\text{CDCl}_3$ )  $\delta$  ppm 5.76 (d,  $J = 7.7$  Hz, 2H), 5.43 (t,  $J = 6.2$  Hz, 1H), 2.83 (dd,  $J = 17.6, 6.2$  Hz, 2H), 2.75 (d,  $J = 18.2$  Hz, 2H);  $^{13}\text{C NMR}$  (125 MHz,  $\text{CDCl}_3$ )  $\delta$  ppm 127.7, 87.7, 39.9; IR (neat,  $\text{cm}^{-1}$ ): 2143, 1403, 1180, 908, 743.

**Cyclohexyl sulfazidate (1z)** was synthesized following General Procedure A, from 1.52 mmol of the

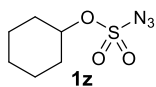

cyclohexanol (commercially available, cas: 108-93-0) and purified by flash silica gel chromatography (eluent: 40: 1 Hexanes/EtOAc), TLC  $R_f = 0.80$  (20:1 Hexanes/EtOAc) to afford 260 mg of desired product as a colorless oil (83% yield).  $^1\text{H NMR}$  (400 MHz,  $\text{CDCl}_3$ )  $\delta$  ppm 4.78-4.85 (m, 1H), 2.02 (ddd,  $J = 12.9, 6.8, 3.4$  Hz, 2H), 1.96-1.67 (m, 4H), 1.67-1.48 (m, 1H), 1.32-1.28 (m, 3H);  $^{13}\text{C NMR}$  (100 MHz,  $\text{CDCl}_3$ )  $\delta$  ppm 87.5, 31.9, 24.6, 23.2; IR (neat,  $\text{cm}^{-1}$ ) 2137, 1401, 1180.

**1,4-Dioxaspiro[4.5]decan-8-yl sulfazidate (1aa)** was synthesized following General Procedure A,

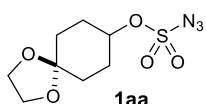

from 1.44 mmol of the 1,4-dioxaspiro[4.5]decan-8-ol (commercially available, cas: 22428-87-1) and purified by flash silica gel chromatography (eluent: 10: 1 Hexanes/EtOAc), TLC  $R_f = 0.30$  (10:1 Hexanes/EtOAc) to afford 452 mg of desired product as a colorless oil (86% yield).  $^1\text{H NMR}$  (400 MHz,  $\text{CDCl}_3$ )  $\delta$  ppm 4.94-4.85 (m, 1H), 4.08-3.82 (m, 4H), 2.19-1.92 (m, 4H), 1.86-1.82 (m, 2H), 1.68-1.60 (m, 2H);  $^{13}\text{C NMR}$  (100 MHz,  $\text{CDCl}_3$ )  $\delta$  ppm 107.0, 84.8, 64.5, 64.4, 30.6, 28.8; IR (neat,  $\text{cm}^{-1}$ ) 2145, 1400, 1183.

**1,4-Dithiaspiro[4.5]decan-8-yl sulfurazidate (1ab)** was synthesized following General Procedure A,

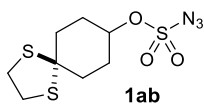

from 1.0 mmol of the 1,4-dithiaspiro[4.5]decan-8-ol (commercially available, cas: 22428-86-0) and purified by flash silica gel chromatography (eluent: 8: 1

Hexanes/EtOAc), TLC  $R_f$  = 0.32 (4:1 Hexanes/EtOAc) to afford 230 mg of desired product as a colorless oil (77% yield).  $^1\text{H}$  NMR (600 MHz,  $\text{CDCl}_3$ )  $\delta$  ppm 5.01-4.78 (m, 1H), 3.37-3.27 (m, 4H), 2.33-2.22 (m, 2H), 2.15- 2.00 (m, 6H);  $^{13}\text{C}$  NMR (150 MHz,  $\text{CDCl}_3$ )  $\delta$  ppm 84.6, 66.5, 38.9, 38.8, 38.3, 31.2; IR (neat,  $\text{cm}^{-1}$ ): 2143, 1405, 1182, 913.

**Benzyl 4-((azidosulfonyl)oxy)piperidine-1-carboxylate (1ac)** was synthesized following General

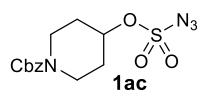

Procedure A, from 1.0 mmol of the 1-(benzyloxycarbonyl)-4-piperidinol (commercially available, cas: 95798-23-5) and purified by flash silica gel

chromatography (eluent: 8: 1 Hexanes/EtOAc), TLC  $R_f$  = 0.30 (4:1 Hexanes/EtOAc) to afford 306 mg of desired product as a colorless oil (90% yield).  $^1\text{H}$  NMR (400 MHz,  $\text{CDCl}_3$ )  $\delta$  ppm 7.40-7.28 (m, 5H), 5.14 (s, 2H), 4.96 (tt,  $J$  = 7.3, 3.7 Hz, 1H), 3.74 (ddd,  $J$  = 13.4, 7.5, 3.9 Hz, 2H), 3.47 (ddd,  $J$  = 13.8, 7.5, 4.0 Hz, 2H), 2.12-1.96 (m, 2H), 1.96-1.81 (m, 2H);  $^{13}\text{C}$  NMR (100 MHz,  $\text{CDCl}_3$ )  $\delta$  ppm 155.0, 136.4, 128.5, 128.1, 127.9, 83.3, 67.4, 40.3, 30.8; IR (neat,  $\text{cm}^{-1}$ ): 2105, 1684, 1402, 1185.

**(3r,6r)-1,1-Difluorospiro[2.5]octan-6-yl sulfurazidate (1ad)** was synthesized following General

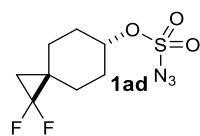

Procedure A, from 2.5 mmol of 1,1-difluorospiro[2.5]octan-6-ol (synthesized through the  $\text{NaBH}_4$  reduction of the corresponding ketone;<sup>10</sup> 1:1 mixture of diastereoisomers

for the resulting alcohols; once formed sulfamate esters, diastereoisomers are separable via flash silica gel chromatography (eluent: 4: 1 Hexanes/EtOAc), less polar compound is the desired *trans* diastereomer of sulfamate ester.) and purified by flash silica gel chromatography (eluent: 20: 1 Hexanes/EtOAc), TLC  $R_f$  = 0.55 (20:1 Hexanes/EtOAc) to afford 310 mg of desired product as white solid (47% yield).  $^1\text{H}$  NMR (500 MHz,  $\text{CDCl}_3$ )  $\delta$  ppm 4.97 (tt,  $J$  = 6.7, 3.5 Hz, 1H), 2.07-1.90 (m, 4H), 1.83 (dddd,  $J$  = 11.0, 8.7, 4.4, 2.3 Hz, 2H), 1.70-1.54 (m, 2H), 1.10 (t,  $J$  = 8.4 Hz, 2H);  $^{13}\text{C}$  NMR (125 MHz,  $\text{CDCl}_3$ )  $\delta$  ppm 116.1 (t,  $J$  = 288.5 Hz), 85.3, 30.2, 27.2 (t,  $J$  = 10.0 Hz), 24.8, 22.0 (t,  $J$  = 10.1 Hz);  $^{19}\text{F}$  NMR (470 MHz,  $\text{CDCl}_3$ )  $\delta$  ppm -140.27; IR (neat,  $\text{cm}^{-1}$ ): 2959, 2142, 1400, 1183, 904, 623.

**5,8-Dioxaspiro[3.4]octan-2-yl sulfurazidate (1ae)** was synthesized following General Procedure A,

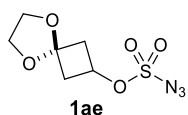

from 2.0 mmol of the 5,8-dioxaspiro[3.4]octan-2-ol,<sup>11</sup> which was synthesized from 3-benzyloxycyclobutan-1-one (commercially available, cas: 30830-27-4) and purified by flash silica gel chromatography (eluent: 10: 1 Hexanes/EtOAc), TLC  $R_f$  = 0.32 (4:1 Hexanes/EtOAc) to afford 320 mg of desired product as a colorless oil (68% yield).  $^1\text{H}$  NMR (600 MHz,  $\text{CDCl}_3$ )  $\delta$  ppm 5.02-4.96 (m, 1H), 3.91 (s, 4H), 2.87-2.72 (m, 4H);  $^{13}\text{C}$  NMR (150 MHz,  $\text{CDCl}_3$ )  $\delta$  ppm 103.0, 71.9, 64.8, 64.4, 44.2; IR (neat,  $\text{cm}^{-1}$ ): 2143, 1405, 1185, 910.

## 2.2. TGA and DSC Result for 1a

Simultaneous TGA-DSC was run on a machine of NETZSCH STA 449F1. The result was analyzed using software of Proteus Analysis. Temperature program: 25 °C to 280 °C at 5 °C/min rate under N<sub>2</sub> in a sealed aluminum crucible. 19.9 mg of sample was used for analysis.

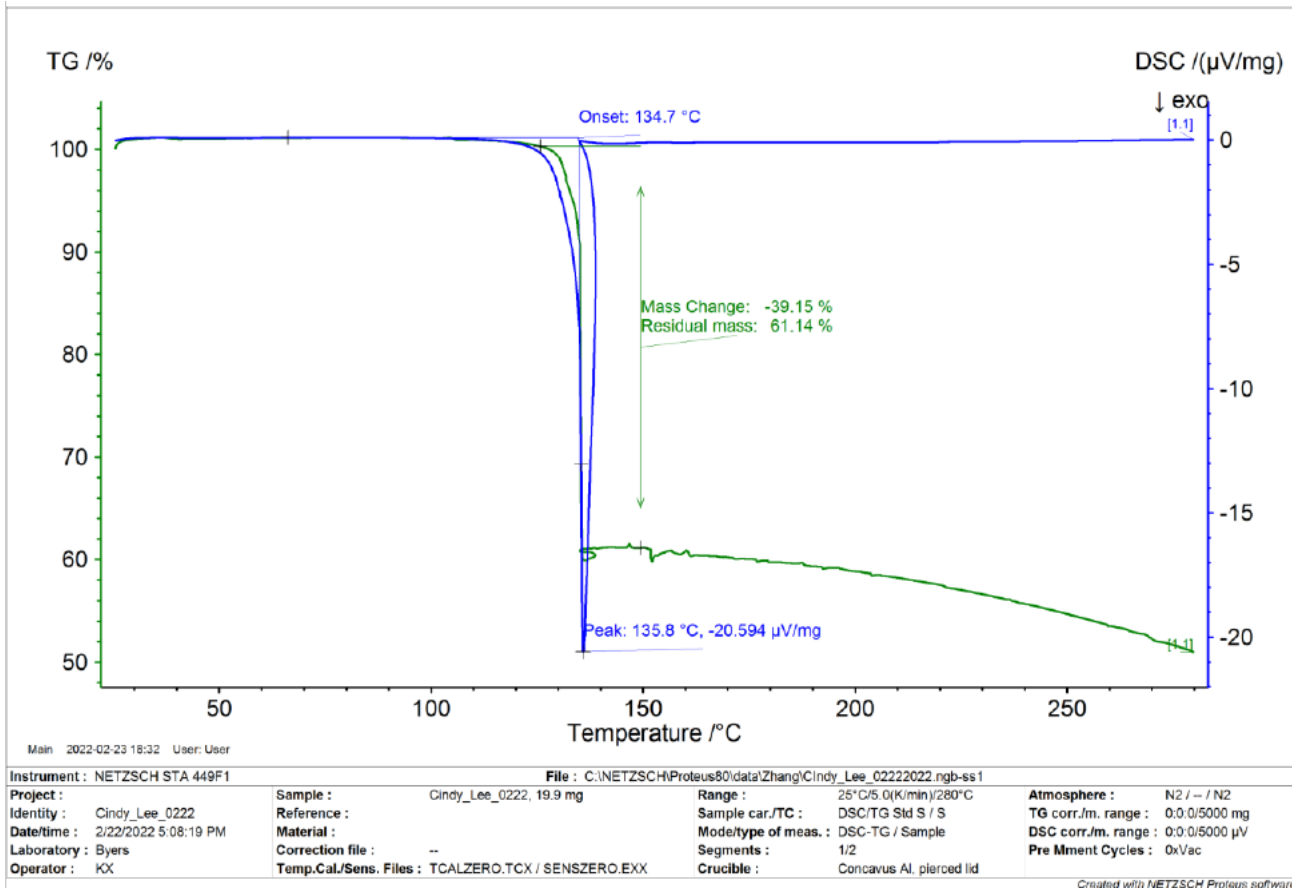

### 3. General Procedure B: Intramolecular C–H Amination

An oven-dried Schlenk tube that was previously charged with catalyst (0.002 mmol) and 4Å molecular sieves (20 mg), was evacuated and backfilled with nitrogen gas. The Teflon screw cap was replaced with a rubber septum and 1.0 mL of solvent was added followed by azide (0.1 mmol). The Schlenk tube was then purged with nitrogen for 2 minutes and the rubber septum was replaced with a Teflon screw cap. The reaction mixture was then stirred for the desired time and temperature. Following completion of the reaction, the reaction mixture was purified via flash silica gel chromatography. The fractions containing product were collected and concentrated by rotary evaporation to afford the pure compound.

#### 3.1. Synthesis and Characterization of Sulfamidates

(*S*)-4-Phenyl-1,2,3-oxathiazolidine 2,2-dioxide (**2a**) was synthesized following General Procedure B,

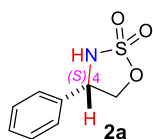

starting from 0.2 mmol scale, and purified by flash silica gel chromatography (eluent: 15: 1 DCM/EtOAc), TLC  $R_f$  = 0.40 (10: 1 DCM/EtOAc) to afford the desired product as white solid (98% yield). m.p. 112-114 °C.  $[\alpha]_D^{20}$  = +40.0° ( $c$  = 0.6, CHCl<sub>3</sub>). <sup>1</sup>H NMR (500 MHz, CDCl<sub>3</sub>)  $\delta$  ppm 7.49-7.38 (m, 5H), 5.08 (dd,  $J$  = 8.4, 7.0 Hz, 1H), 4.84 (dd,  $J$  = 8.8, 6.9 Hz, 1H), 4.78 (s, 1H), 4.45 (t,  $J$  = 8.6 Hz, 1H); <sup>13</sup>C NMR (150 MHz, CDCl<sub>3</sub>)  $\delta$  ppm 135.5, 129.7, 129.6, 126.8, 75.2, 59.8.

IR (neat, cm<sup>-1</sup>): 1352, 1189; HRMS (ESI)  $m/z$  calcd for C<sub>8</sub>H<sub>9</sub>NNaO<sub>3</sub>S<sup>+</sup> [M+Na]<sup>+</sup>: 222.0201, obsd: 222.0195; HPLC analysis: ee = 98%. Chiral AD-H (10% isopropanol - 90% hexanes, 1.0 mL/min): Major  $t$  = 17.33 min., Minor  $t$  = 19.59 min. 4-[*S*] absolute configuration of the product was determined by X-ray crystallography. **Reactions were successfully scaled up to 2.0 mmol** without any notable change for either enantioselectivity or yield.

(*S*)-4-(4-*tert*-Butylphenyl)-1,2,3-oxathiazolidine 2,2-dioxide (**2b**) was synthesized following General

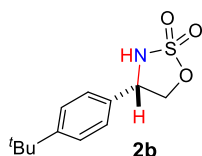

Procedure B, and purified by flash silica gel chromatography (eluent: DCM), TLC  $R_f$  = 0.30 (DCM) to afford the desired product as white solid (98% yield). m.p. 140-142

°C.  $[\alpha]_{\text{D}}^{20} = +115.0^\circ$  ( $c = 1.1$ ,  $\text{CHCl}_3$ );  $^1\text{H NMR}$  (250 MHz,  $\text{CDCl}_3$ )  $\delta$  ppm 7.42-7.32 (m, 2H), 7.32-7.22 (m, 2H), 5.14-4.94 (m, 1H), 4.91-4.66 (m, 2H), 4.38 (t,  $J = 8.6$  Hz, 1H), 1.25 (s, 9 H);  $^{13}\text{C NMR}$  (62.5 MHz,  $\text{CDCl}_3$ )  $\delta$  ppm 152.9, 132.1, 126.6, 126.4, 75.3, 59.5, 34.8, 31.2; IR (neat,  $\text{cm}^{-1}$ ): 1345, 1155; HRMS (ESI)  $m/z$  calcd for  $\text{C}_{12}\text{H}_{17}\text{NNaO}_3\text{S}^+$   $[\text{M}+\text{Na}]^+$ : 278.0827, obsd: 278.0830; HPLC analysis: ee = 97%. Chiral AD-H (10% isopropanol - 90% hexanes, 0.7 mL/min): Major t = 12.55 min., Minor t = 15.48 min.

**(S)-4-(4-Methoxyphenyl)-1,2,3-oxathiazolidine 2,2-dioxide (2c)** was synthesized following General

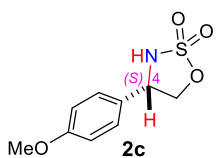

Procedure B, and purified by flash silica gel chromatography (eluent: 15: 1 DCM/EtOAc), TLC  $R_f = 0.25$  (10: 1 DCM/EtOAc) to afford the desired product as white solid (87% yield). m.p. 102-103 °C.  $[\alpha]_{\text{D}}^{20} = +28.0^\circ$  ( $c = 1.0$ ,  $\text{CHCl}_3$ );  $^1\text{H NMR}$

(600 MHz,  $\text{CDCl}_3$ )  $\delta$  ppm  $^1\text{H NMR}$  (600 MHz,  $\text{CDCl}_3$ )  $\delta$  ppm 7.34 (d,  $J = 8.7$  Hz, 2H), 6.94 (d,  $J = 8.7$  Hz, 2H), 5.02 (dd,  $J = 15.4, 6.9$  Hz, 1H), 4.78 (dt,  $J = 12.4, 6.2$  Hz, 1H), 4.74 (br. s, 1H), 4.44 (t,  $J = 8.7$  Hz, 1H), 3.82 (s, 3H);  $^{13}\text{C NMR}$  (150 MHz,  $\text{CDCl}_3$ )  $\delta$  ppm 160.7, 128.3, 127.1, 114.9, 75.4, 59.5, 55.6; IR (neat,  $\text{cm}^{-1}$ ): 1388, 1152; HRMS (ESI)  $m/z$  calcd for  $\text{C}_9\text{H}_{11}\text{NNaO}_4\text{S}^+$   $[\text{M}+\text{Na}]^+$ : 252.0306, obsd: 252.0312; HPLC analysis: ee = 95%. Chiral AD-H (10% isopropanol - 90% hexanes, 0.7 mL/min): Major t = 24.36 min., Minor t = 28.58 min. 4-[S] absolute configuration of the product was determined by X-ray crystallography.

**(S)-4-(3-Methoxyphenyl)-1,2,3-oxathiazolidine 2,2-dioxide (2d)** was synthesized following General

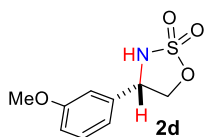

Procedure B, and purified by flash silica gel chromatography (eluent: 15: 1 DCM/EtOAc), TLC  $R_f = 0.28$  (10: 1 DCM/EtOAc) to afford the desired product as a colorless oil (96% yield).  $[\alpha]_{\text{D}}^{20} = +30.0^\circ$  ( $c = 1.3$ ,  $\text{CHCl}_3$ );  $^1\text{H NMR}$  (250 MHz,

$\text{CDCl}_3$ )  $\delta$  ppm 7.33-7.21 (m, 1H), 6.94-6.80 (m, 3H), 5.05-4.87 (m, 1H), 4.83 (d,  $J = 6.5$  Hz, 1H), 4.80-4.69 (m, 1H), 4.36 (t,  $J = 8.5$  Hz, 1H), 3.75 (s, 3H);  $^{13}\text{C NMR}$  (62.5 MHz,  $\text{CDCl}_3$ )  $\delta$  ppm 160.3, 136.9, 130.6, 118.7, 115.0, 112.2, 75.6, 59.5, 55.4; IR (neat,  $\text{cm}^{-1}$ ): 1156; HRMS (ESI)  $m/z$  calcd for

$C_9H_{11}NNaO_4S^+$   $[M+Na]^+$ : 252.0306, obsd: 252.0309; HPLC analysis: ee = 97%. Chiral AD-H (10% isopropanol - 90% hexanes, 1.0 mL/min): Major t = 15.36 min., Minor t = 17.74 min.

**(S)-4-(4-Nitrophenyl)-1,2,3-oxathiazolidine 2,2-dioxide (2e)** was synthesized following General

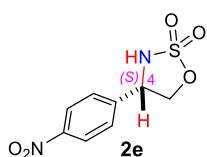

Procedure B, and purified by flash silica gel chromatography (eluent: 15: 1 DCM/EtOAc), TLC  $R_f$  = 0.20 (10: 1 DCM/EtOAc) to afford the desired product as

white solid (82% yield). m.p. 130-133 °C.  $[\alpha]_D^{20}$  = +26.0° ( $c$  = 0.4,  $CHCl_3$ );  $^1H$  NMR (400 MHz, Acetone- $D_6$ )  $\delta$  ppm 8.29 (d,  $J$  = 8.7 Hz, 2H), 7.83 (d,  $J$  = 8.9 Hz, 2H), 7.37 (br. s, 1H), 5.48 (q,  $J$  = 6.7 Hz, 1H), 5.13 (dd,  $J$  = 8.7, 7.5 Hz, 1H), 4.48 (dd,  $J$  = 9.0, 6.7 Hz, 1H);  $^{13}C$  NMR (100 MHz, Acetone- $D_6$ )  $\delta$  ppm 148.0, 145.5, 127.9, 123.8, 74.2, 58.2; IR (neat,  $cm^{-1}$ ): 1611, 1521, 1350, 1188; HRMS (ESI)  $m/z$  calcd for  $C_8H_8N_2NaO_5S^+$   $[M+Na]^+$ : 267.0052, obsd: 267.0054; HPLC analysis: ee = 90%, Chiral AD-H (10% isopropanol - 90% hexanes, 0.7 mL/min): Major t = 46.72 min., Minor t = 72.65 min. 4-[S] absolute configuration of the product was determined by X-ray crystallography.

**(S)-4-(4-Trifluoromethylphenyl)-1,2,3-oxathiazolidine 2,2-dioxide (2f)** was synthesized following

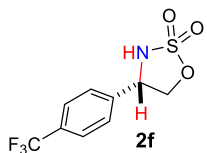

General Procedure B, and purified by flash silica gel chromatography (eluent: 15: 1 DCM/EtOAc), TLC  $R_f$  = 0.35 (10: 1 DCM/EtOAc) to afford the desired product as

white solid (94% yield). m.p. 74-76 °C.  $[\alpha]_D^{20}$  = +38.0° ( $c$  = 0.4,  $CHCl_3$ );  $^1H$  NMR (250 MHz,  $CDCl_3$ )  $\delta$  ppm 7.70 (d,  $J$  = 8.3 Hz, 2H), 7.57 (d,  $J$  = 8.2 Hz, 2H), 5.16 (dd,  $J$  = 14.4, 7.2 Hz, 1H), 5.04 (d,  $J$  = 6.7 Hz, 1H), 4.90 (dd,  $J$  = 8.7, 7.1 Hz, 1H), 4.41 (t,  $J$  = 8.3 Hz, 1H);  $^{13}C$  NMR (62.5 MHz,  $CDCl_3$ )  $\delta$  ppm 139.8, 131.4 (q,  $J$  = 32 Hz), 127.1, 126.4 (q,  $J$  = 4.0 Hz), 123.8 (q,  $J$  = 270 Hz), 74.5, 59.0;  $^{19}F$  NMR (376 MHz,  $CDCl_3$ )  $\delta$  ppm -62.9; IR (neat): 1346, 1182; HRMS (ESI)  $m/z$  calcd for  $C_9H_8F_3NNaO_3S^+$   $[M+Na]^+$ : 290.0075, obsd: 290.0077; HPLC analysis: ee = 94%. Chiral AD-H (10% isopropanol - 90% hexanes, 1.0 mL/min): Major t = 9.99 min., Minor t = 15.32 min.

**(S)-4-(4-Chlorophenyl)-1,2,3-oxathiazolidine 2,2-dioxide (2g)** was synthesized following General

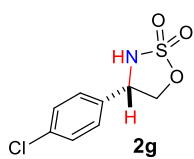

Procedure B, and purified by flash silica gel chromatography (eluent: 15: 1 DCM/EtOAc), TLC  $R_f = 0.35$  (10: 1 DCM/EtOAc) to afford the desired product as

white solid (98% yield). m.p. 130-131 °C.  $[\alpha]_D^{20} = +32.0^\circ$  ( $c = 0.9$ ,  $\text{CHCl}_3$ );  $^1\text{H NMR}$  (500 MHz,  $\text{CDCl}_3$ )  $\delta$  ppm 7.45-7.35 (m, 4H), 5.06 (t,  $J = 7.5$  Hz, 1H), 4.84 (dd,  $J = 8.8, 7.0$  Hz, 1H), 4.83 (br. s, 1H), 4.40 (t,  $J = 10.0$  Hz, 1H);  $^{13}\text{C NMR}$  (150 MHz,  $\text{CDCl}_3$ )  $\delta$  ppm 135.7, 134.3, 129.8, 128.2, 74.7, 59.1; IR(neat) 1140; HRMS (ESI)  $m/z$  calcd for  $\text{C}_8\text{H}_8\text{ClNNaO}_3\text{S}^+$   $[\text{M}+\text{Na}]^+$ : 255.9811, obsd: 255.9814; HPLC analysis: ee = 95%, Chiral AD-H (5% isopropanol - 95% hexanes, 1.0 mL/min): Major t = 36.23 min., Minor t = 54.21 min.

**(S)-4-(4-Bromophenyl)-1,2,3-oxathiazolidine 2,2-dioxide (2h)** was synthesized following General

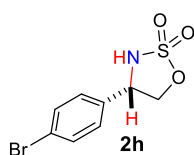

Procedure B, and purified by flash silica gel chromatography (eluent: 15:1 DCM/EtOAc), TLC  $R_f = 0.35$  (10: 1 DCM/EtOAc) to afford the desired product as

white solid (90% yield). m.p. 118-120 °C.  $[\alpha]_D^{20} = +26.0^\circ$  ( $c = 1.1$ ,  $\text{CHCl}_3$ );  $^1\text{H NMR}$  (400 MHz,  $\text{CDCl}_3$ )  $\delta$  ppm 7.59-7.49 (m, 2H), 7.36-7.26 (m, 2H), 5.05-4.95 (m, 2H), 4.81 (dd,  $J = 8.8, 7.1$  Hz, 1H), 4.36 (dd,  $J = 8.8, 7.9$  Hz, 1H);  $^{13}\text{C NMR}$  (100 MHz,  $\text{CDCl}_3$ )  $\delta$  ppm 134.7, 132.5, 128.3, 123.6, 74.5, 58.9; IR (neat,  $\text{cm}^{-1}$ ): 1178, 1055; HRMS (ESI)  $m/z$  calcd for  $\text{C}_8\text{H}_8\text{BrNNaO}_3\text{S}^+$   $[\text{M}+\text{Na}]^+$  299.9301, obsd: 299.9300; HPLC analysis: ee = 94%; Chiral AD-H (10% isopropanol - 90% hexanes, 0.7 mL/min): Major t = 18.93 min., Minor t = 26.81 min.

**(S)-4-(3-Bromophenyl)-1,2,3-oxathiazolidine 2,2-dioxide (2i)** was synthesized following General

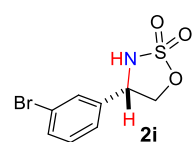

Procedure B, and purified by flash silica gel chromatography (eluent: 4:1 Hexanes/Ethyl acetate), TLC  $R_f = 0.20$  (4:1 Hexanes/EtOAc) to afford the desired

product as white solid (92% yield).  $[\alpha]_D^{20} = +34.1^\circ$  ( $c = 1.2$ ,  $\text{CHCl}_3$ );  $^1\text{H NMR}$  (500 MHz,  $\text{CDCl}_3$ )  $\delta$  ppm 7.58 (t,  $J = 1.7$  Hz, 1H), 7.56-7.53 (m, 1H), 7.38-7.37 (m, 1H), 7.33-7.30 (m, 1H), 5.05 (t,  $J = 7.6$  Hz, 1H), 4.85 (dd,  $J = 8.8, 7.1$  Hz, 1H), 4.76 (s, 1H), 4.45-4.38 (m, 1H);  $^{13}\text{C NMR}$  (150 MHz,  $\text{CDCl}_3$ )  $\delta$  ppm 138.1, 132.8, 131.1, 129.9, 125.3, 123.6, 74.5, 59.0; IR (neat,  $\text{cm}^{-1}$ ): 1214, 749;



HRMS (ESI)  $m/z$  calcd for  $C_8H_9BrNO_3S^+$   $[M+H]^+$  277.9481, obsd: 277.9481; HPLC analysis: ee = 97%. Chiral AD-H (10% isopropanol - 90% hexanes, 1.0 mL/min): Major t = 13.64 min., Minor t = 15.77 min.

**(S)-4-(Furan-2-yl)-1,2,3-oxathiazolidine 2,2-dioxide (2j)** was synthesized following General

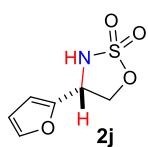

Procedure B, and purified by flash silica gel chromatography (eluent: DCM), TLC  $R_f$  = 0.27 (DCM) to afford the desired product as an oil (95% yield).  $[\alpha]_D^{20}$  = +9.8° ( $c$  = 0.7,  $CHCl_3$ );  $^1H$  NMR (600 MHz,  $CDCl_3$ )  $\delta$  ppm 7.48 (d,  $J$  = 1.0 Hz, 1H), 6.51 (d,  $J$  = 3.3 Hz, 1H), 6.42 (dd,  $J$  = 3.1, 1.9 Hz, 1H), 5.11 (dd,  $J$  = 15.1, 8.1 Hz, 1H), 4.76 (dd,  $J$  = 8.5, 6.8 Hz, 1H), 4.73 (s, 1H), 4.66 (t,  $J$  = 8.4 Hz, 1H);  $^{13}C$  NMR (150 MHz,  $CDCl_3$ )  $\delta$  ppm 146.9, 144.2, 111.2, 110.5, 73.0, 53.4; IR (neat,  $cm^{-1}$ ): 1298; HRMS (ESI)  $m/z$  calcd for  $C_6H_7NNaO_4S^+$   $[M+Na]^+$ : 211.9993, obsd: 211.9994; HPLC analysis: ee = 94%. Chiral OD-H (7% isopropanol - 93% hexanes, 1.0 mL/min): Major t = 53.64 min., Minor t = 38.33 min.

**(S)-4-(Thiophen-2-yl)-1,2,3-oxathiazolidine 2,2-dioxide (2k)** was synthesized following General

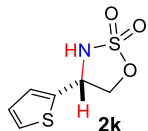

Procedure B, and purified by flash silica gel chromatography (eluent: DCM), TLC  $R_f$  = 0.25 (DCM) to afford the desired product as white solid (98% yield). m.p. 62-64 °C.  $[\alpha]_D^{20}$  = +6.8° ( $c$  = 1.5,  $CHCl_3$ );  $^1H$  NMR (400 MHz,  $CDCl_3$ )  $\delta$  ppm 7.37 (d,  $J$  = 5.1 Hz, 1H), 7.19-7.13 (m, 1H), 7.03 (dd,  $J$  = 5.1, 3.6 Hz, 1H), 5.28-5.35 (m, 1H), 4.95 (d,  $J$  = 6.3 Hz, 1H), 4.83 (dd,  $J$  = 8.6, 6.6 Hz, 1H), 4.54 (t,  $J$  = 8.5 Hz, 1H);  $^{13}C$  NMR (100 MHz,  $CDCl_3$ )  $\delta$  ppm 137.4, 127.6, 127.1, 127.0, 75.3, 55.4; IR (neat,  $cm^{-1}$ ): 1346, 1155; HRMS (ESI)  $m/z$  calcd for  $C_6H_7NNaO_3S_2^+$   $[M+Na]^+$ : 227.9765, obsd: 227.9769; HPLC analysis: ee = 97%. Chiral AD-H (10% isopropanol - 90% hexanes, 1.0 mL/min): Major t = 15.02 min., Minor t = 16.21 min.

**(S)-4-(2,3-Dihydrobenzofuran-5-yl)-1,2,3-oxathiazolidine 2,2-dioxide (2l)** was synthesized

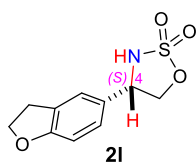

following General Procedure B, and purified by flash silica gel chromatography (eluent: 4:1 Hexanes/Ethyl acetate), to afford the desired product as white solid (67% yield) (TLC  $R_f$  = 0.25 (4:1 Hexanes/EtOAc). m.p. 131-133 °C.  $[\alpha]_D^{20}$  = +28.2° ( $c$  = 0.9,

CHCl<sub>3</sub>). <sup>1</sup>H NMR (600 MHz, CDCl<sub>3</sub>) δ ppm 7.29 (s, 1H), 7.12 (dd, *J* = 8.2, 1.6 Hz, 1H), 6.79 (d, *J* = 8.2 Hz, 1H), 5.00 (dt, *J* = 8.7, 6.8 Hz, 1H), 4.78 (dd, *J* = 8.8, 6.8 Hz, 1H), 4.61 (t, *J* = 8.7 Hz, 2H), 4.55 (d, *J* = 6.4 Hz, 1H), 4.44 (t, *J* = 8.8 Hz, 1H), 3.23 (t, *J* = 8.7 Hz, 2H); <sup>13</sup>C NMR (150 MHz, CDCl<sub>3</sub>) δ ppm 161.4, 128.8, 127.3, 127.0, 123.6, 110.0, 75.4, 71.8, 59.8, 29.6; IR (neat, cm<sup>-1</sup>): 3269, 1615, 1494, 1346, 1184, 958, 789; HRMS (ESI) *m/z* calcd for C<sub>10</sub>H<sub>12</sub>NO<sub>4</sub>S<sup>+</sup> [M+H]<sup>+</sup>: 242.0482, obsd: 242.0488; HPLC analysis: ee = 94%. Chiral AD-H (10% isopropanol - 90% hexanes, 1.0 mL/min): Major t = 22.03 min., Minor t = 27.96 min. 4-[*S*] absolute configuration of the product was determined by X-ray crystallography.

**(*S*)-4-(Benzo[*b*]thiophen-4-yl)-1,2,3-oxathiazolidine 2,2-dioxide (2m)** was synthesized following

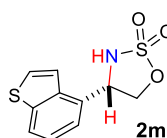

General Procedure B, and purified by flash silica gel chromatography (eluent: 4: 1 Hexanes/EtOAc), TLC *R<sub>f</sub>* = 0.30 (3: 1 Hexanes/EtOAc) to afford the desired product as a colorless oil (97% yield). [α]<sub>D</sub><sup>20</sup> = +15.0° (*c* = 0.8, CHCl<sub>3</sub>); <sup>1</sup>H NMR (600 MHz, CDCl<sub>3</sub>) δ ppm 7.95 (d, *J* = 8.1 Hz, 1H), 7.63 (d, *J* = 5.5 Hz, 1H), 7.57 (d, *J* = 5.6 Hz, 1H), 7.50 (d, *J* = 7.3 Hz, 1H), 7.41 (t, *J* = 7.7 Hz, 1H), 5.56 (dd, *J* = 15.2, 7.2 Hz, 1H), 4.94 (dd, *J* = 8.6, 7.1 Hz, 1H), 4.79 (d, *J* = 6.6 Hz, 1H), 4.64 (t, *J* = 8.7 Hz, 1H); <sup>13</sup>C NMR (150 MHz, CHCl<sub>3</sub>) δ ppm 141.4, 137.1, 129.5, 128.8, 124.6, 124.0, 122.6, 120.3, 74.1, 58.4; IR (neat, cm<sup>-1</sup>): 1354, 1264, 730, 702; HRMS (ESI) *m/z* calcd for C<sub>10</sub>H<sub>10</sub>NO<sub>3</sub>S<sub>2</sub><sup>+</sup> [M+H]<sup>+</sup>: 256.0097, obsd: 256.0092; HPLC analysis: ee = 81%. Chiral AS-H (20% isopropanol - 80% hexanes, 1.0 mL/min): Major t = 56.09 min., Minor t = 44.78 min.

**(*S*)-*tert*-Butyl 3-(2,2-dioxido-1,2,3-oxathiazolidin-4-yl)-1H-indole-1-carboxylate (2n)** was

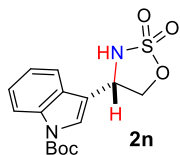

synthesized following General Procedure B, and purified by flash silica gel chromatography (eluent: 15: 1 DCM/EtOAc), TLC *R<sub>f</sub>* = 0.25 (10: 1 DCM/EtOAc) to afford the desired product as an off-white solid (98% yield). m.p. 134-136 °C. [α]<sub>D</sub><sup>20</sup> = +12.0° (*c* = 1.0, CHCl<sub>3</sub>). <sup>1</sup>H NMR (400 MHz, CDCl<sub>3</sub>) δ ppm 8.16 (d, *J* = 8.3 Hz, 1H), 7.41-7.35 (m, 1H), 7.34-7.23 (m, 1H), 7.67 (d, *J* = 8.2 Hz, 2H), 5.40-5.23 (m, 1H), 4.85 (dd, *J* = 8.6, 6.7 Hz, 2H), 4.68 (t, *J* = 8.6 Hz, 1H), 1.68 (s, 9 H); <sup>13</sup>C NMR (100 MHz, CDCl<sub>3</sub>) δ ppm 149.1, 135.8, 127.3, 125.5, 124.6, 123.3, 118.8, 115.8, 114.2, 84.8, 73.5, 53.1, 28.1; IR (neat, cm<sup>-1</sup>): 1735, 1373, 1190; HRMS (ESI) *m/z* calcd for C<sub>15</sub>H<sub>18</sub>N<sub>2</sub>NaO<sub>5</sub>S<sup>+</sup> [M+Na]<sup>+</sup>: 361.0834, obsd: 361.0832; HPLC analysis: ee = 89%.

Chiral OD-H (10% isopropanol - 90% hexanes, 1.0 mL/min): Major t = 34.25 min., Minor t = 24.11 min.

**(S,E)-4-Styryl-1,2,3-oxathiazolidine 2,2-dioxide (2o)** was synthesized following General Procedure

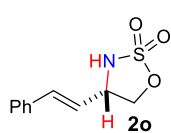

B, and purified by flash silica gel chromatography (eluent: 15: 1 DCM/EtOAc), TLC  $R_f$  = 0.45 (10: 1 DCM/EtOAc) to afford the desired product as white solid (89% yield). m.p. 160-162 °C.  $[\alpha]_D^{20} = +160.0^\circ$  ( $c = 0.4$ ,  $\text{CHCl}_3$ ).  $^1\text{H NMR}$  (600 MHz, Acetone- $D_6$ )  $\delta$  ppm 7.49 (d,  $J = 7.4$  Hz, 2H), 7.37 (t,  $J = 7.6$  Hz, 2H), 7.31 (t,  $J = 7.3$  Hz, 1H), 6.87 (d,  $J = 15.8$  Hz, 1H), 6.81 (s, 1H), 6.36 (dd,  $J = 15.8, 7.6$  Hz, 1H), 4.85-4.80 (m, 1H), 4.80-4.74 (m, 1H), 4.39 (t,  $J = 8.0$  Hz, 1H);  $^{13}\text{C NMR}$  (150 MHz, Acetone- $D_6$ )  $\delta$  ppm 136.9, 135.6, 129.6, 129.2, 127.6, 124.9, 74.9, 59.0; IR (neat,  $\text{cm}^{-1}$ ): 1355, 1190; HRMS (ESI)  $m/z$  calcd for  $\text{C}_{10}\text{H}_{11}\text{NNaO}_3\text{S}^+$   $[\text{M}+\text{Na}]^+$ : 248.0357, obsd: 248.0361; HPLC analysis: ee = 91%. Chiral AD-H (7% isopropanol - 93% hexanes, 1.0 mL/min): Major t = 24.57 min., Minor t = 30.54 min.

**(S,E)-4-(But-1-en-1-yl)-1,2,3-oxathiazolidine 2,2-dioxide (2p)** was synthesized following General

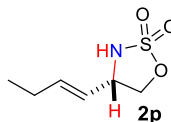

Procedure B, and purified by flash silica gel chromatography (eluent: 15: 1 DCM/EtOAc), TLC  $R_f$  = 0.45 (10: 1 DCM/EtOAc) to afford the desired product as an oil (85% yield).  $[\alpha]_D^{20} = +54.0^\circ$  ( $c = 0.7$ ,  $\text{CHCl}_3$ );  $^1\text{H NMR}$  (400 MHz,  $\text{CDCl}_3$ )  $\delta$  ppm 5.92 (td,  $J = 15.3, 6.3$  Hz, 1H), 5.39 (dd,  $J = 15.3, 7.9$  Hz, 1H), 4.59 (dd,  $J = 8.3, 6.4$  Hz, 1H), 4.44 (dd,  $J = 14.9, 7.9$  Hz, 1H), 4.20 (t,  $J = 8.4$  Hz, 1H), 2.12-2.04 (m, 2H), 1.00 (t,  $J = 7.5$  Hz, 3H);  $^{13}\text{C NMR}$  (100 MHz,  $\text{CDCl}_3$ )  $\delta$  ppm 140.7, 122.1, 74.4, 58.5, 25.2, 12.8; IR (neat,  $\text{cm}^{-1}$ ): 1356, 1176; HRMS (ESI)  $m/z$  calcd for  $\text{C}_6\text{H}_{11}\text{NNaO}_3\text{S}^+$   $[\text{M}+\text{Na}]^+$ : 200.0357, obsd: 200.0359; HPLC analysis: ee = 89%. Chiral AD-H (5 % isopropanol - 95% hexanes, 1.0 mL/min): Major t = 14.45 min., Minor t = 15.18 min.

**(S)-4-Vinyl-1,2,3-oxathiazolidine 2,2-dioxide (2q)** was synthesized following General Procedure B,

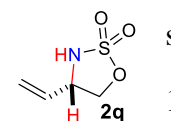

starting from 0.3 mmol scale, and purified by flash silica gel chromatography (eluent: 15: 1 DCM/EtOAc), TLC  $R_f$  = 0.45 (10: 1 DCM/EtOAc) to afford the desired product as an oil (67% yield).  $[\alpha]_D^{20} = -12.0^\circ$  ( $c = 0.2$ ,  $\text{CHCl}_3$ );  $^1\text{H NMR}$  (500 MHz,  $\text{CDCl}_3$ )  $\delta$  ppm 5.84 (ddd,  $J = 17.3, 10.3, 7.2$  Hz, 1H), 5.50-5.45 (m, 1H), 5.42 (dd,  $J = 8.6, 5.4$  Hz, 1H), 4.69 (s, 1H), 4.67 (dd,  $J = 8.2, 6.5$

Hz, 1H), 4.55-4.47 (m, 1H), 4.27 (t,  $J = 8.0$  Hz, 1H);  $^{13}\text{C}$  NMR (150 MHz,  $\text{CDCl}_3$ )  $\delta$  ppm 131.9, 121.9, 73.9, 58.6; IR (neat,  $\text{cm}^{-1}$ ): 1346, 1182; HRMS (ESI)  $m/z$  calcd for  $\text{C}_4\text{H}_7\text{NNaO}_3\text{S}^+$   $[\text{M}+\text{Na}]^+$ : 172.0044, obsd: 172.0043.

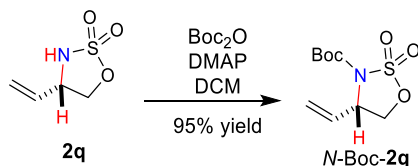

***tert*-Butyl (S)-4-vinyl-1,2,3-oxathiazolidine-3-carboxylate 2,2-dioxide (N-Boc-2q)** was synthesized according to the following procedure. At 0 °C,  $(\text{Boc})_2\text{O}$  (49 mg, 1.5 equiv) and DMAP (2 mg) were added to a solution of **2q** (30 mg, 0.15 mmol) in anhydrous DCM (2 mL). The reaction mixture was stirred for 30 min then the solvent was removed. The residue was purified by flash silica gel chromatography (eluent: 8:1 Hexanes/EtOAc) to afford product **N-Boc-2q** as white solid (95% yield) (TLC  $R_f = 0.43$  (8: 1 Hexanes/EtOAc)).  $^1\text{H}$  NMR (600 MHz,  $\text{CDCl}_3$ )  $\delta$  ppm 5.92 (ddd,  $J = 17.0, 9.8, 7.3$  Hz, 1H), 5.46 (d,  $J = 17.0$  Hz, 1H), 5.41 (d,  $J = 10.3$  Hz, 1H), 4.78-4.75 (m, 1H), 4.70 (dd,  $J = 8.7, 6.6$  Hz, 1H), 4.30 (dd,  $J = 9.1, 2.5$  Hz, 1H), 1.54 (s, 9H);  $^{13}\text{C}$  NMR (150 MHz,  $\text{CDCl}_3$ )  $\delta$  ppm 148.4, 132.3, 120.3, 85.7, 70.1, 59.4, 28.1; IR (neat,  $\text{cm}^{-1}$ ): 1710, 1334, 1210, 1201, 1148, 805; HRMS (DART)  $m/z$  calcd for  $\text{C}_9\text{H}_{19}\text{N}_2\text{O}_5\text{S}^+$   $[\text{M}+\text{NH}_4]^+$ : 267.1009, obsd: 267.1014.

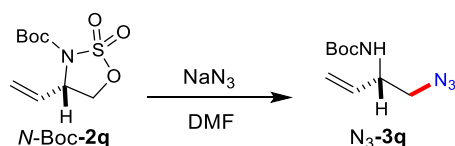

***tert*-Butyl (S)-(1-azidobut-3-en-2-yl)carbamate (N<sub>3</sub>-3q)** was synthesized according to the following procedure.  $\text{NaN}_3$  (28.2 mg, 0.43 mmol) was added to a stirred solution of **N-Boc-2q** (0.14 mmol) in DMF (0.8 mL) at rt. After 24 h, the reaction mixture was stirred for 30 min between ether (2 mL) and 1N citric acid (5 mL). The aqueous layer was extracted with  $\text{Et}_2\text{O}$  (3 x 20 mL) and the organic layers were combined, dried, and concentrated. The residue was purified by flash silica gel chromatography (eluent: 8:1 Hexanes/EtOAc) to afford product **N<sub>3</sub>-3q** as colorless oil (97%), TLC  $R_f = 0.33$  (8:1 Hexanes/EtOAc).  $[\alpha]_{\text{D}}^{20} = -42.6^\circ$  ( $c = 1.1$ ,  $\text{CHCl}_3$ );  $^1\text{H}$  NMR (600 MHz,  $\text{CDCl}_3$ )  $\delta$  ppm 5.87-5.76 (m, 1H), 5.29 (d,  $J = 17.3$  Hz, 1H), 5.25 (d,  $J = 10.5$  Hz, 1H), 4.76 (br.s, 1H), 4.34 (br.s, 1H), 3.50-3.40 (m, 2H), 1.46 (s, 9H);  $^{13}\text{C}$  NMR (150 MHz,  $\text{CDCl}_3$ )  $\delta$  ppm 156.2, 135.5, 117.1, 80.1, 54.8, 52.4, 28.5; IR

(neat,  $\text{cm}^{-1}$ ): 3327, 2101, 1706, 1507, 1172; HRMS (DART)  $m/z$  calcd for  $\text{C}_9\text{H}_{17}\text{N}_4\text{O}_2^+$   $[\text{M}+\text{H}]^+$ : 213.1346, obsd: 213.1355; HPLC analysis: ee = 80%. Chiral IC (2% isopropanol - 98% hexanes, 1.0 mL/min): Major t = 16.04 min., Minor t = 13.20 min.

**(S)-4-(Phenylethynyl)-1,2,3-oxathiazolidine 2,2-dioxide (2r)** was synthesized following General

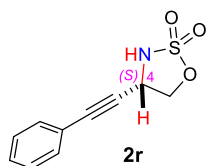

Procedure B, and purified by flash silica gel chromatography (eluent: DCM), TLC  $R_f$  = 0.40 (DCM) to afford the desired product as white solid (94% yield). m.p. 65-67 °C.

$[\alpha]_{\text{D}}^{20} = -9.6^\circ$  ( $c = 1.5$ ,  $\text{CHCl}_3$ );  $^1\text{H}$  NMR (400 MHz,  $\text{CDCl}_3$ )  $\delta$  ppm 7.52-7.39 (m, 2H), 7.38-7.30 (m, 3H), 4.97-4.84 (m, 1H), 4.78 (dd,  $J = 8.3, 6.5$  Hz, 1H), 4.64-4.58 (m, 1H), 4.49 (t,  $J = 8.2$  Hz, 1H);  $^{13}\text{C}$  NMR (100 MHz,  $\text{CDCl}_3$ )  $\delta$  ppm 131.9, 129.6, 128.5, 120.6, 88.4, 80.8, 74.2, 47.9; IR (neat,  $\text{cm}^{-1}$ ): 2185, 1355, 1187; HRMS (ESI)  $m/z$  calcd for  $\text{C}_{10}\text{H}_9\text{NNaO}_3\text{S}^+$   $[\text{M}+\text{Na}]^+$ : 246.0201, obsd: 246.0203; HPLC analysis: ee = 97%. Chiral AD-H(10% isopropanol - 90% hexanes, 0.7 mL/min): Major t = 16.43 min., Minor t = 18.73 min. 4-[S] absolute configuration of the product was determined by X-ray crystallography.

**(S)-4-((Triisopropylsilyl)ethynyl)-1,2,3-oxathiazolidine 2,2-dioxide (2s)** was synthesized following

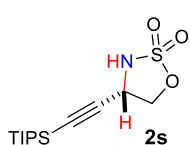

General Procedure B, and purified by flash silica gel chromatography (eluent: DCM), TLC  $R_f$  = 0.60 (DCM) to afford the desired product as a colorless oil (90% yield).

$[\alpha]_{\text{D}}^{20} = -4.0^\circ$  ( $c = 2.0$ ,  $\text{CHCl}_3$ );  $^1\text{H}$  NMR (250 MHz,  $\text{CDCl}_3$ )  $\delta$  ppm 4.84-4.65 (m, 2H), 4.63-4.45 (m, 1H), 4.43-4.36 (m, 1H), 1.09-1.05 (m, 21H);  $^{13}\text{C}$  NMR (62.5 MHz,  $\text{CDCl}_3$ )  $\delta$  ppm 98.5, 91.5, 74.5, 47.8, 18.4, 10.9; IR(neat): 2180, 1380, 1180; HRMS (ESI)  $m/z$  calcd for  $\text{C}_{13}\text{H}_{25}\text{NNaO}_3\text{SSi}^+$   $[\text{M}+\text{Na}]^+$ : 326.1222, obsd: 326.1223; HPLC analysis: ee = 93%. Chiral AD-H (5% isopropanol - 95% hexanes, 1.0 mL/min): Major t = 5.83 min., Minor t = 5.03 min.

**Compound 2t** was synthesized following General Procedure B, and purified by flash silica gel chromatography (eluent: 4: 1 Hexanes/EtOAc), TLC  $R_f$  = 0.30 (3: 1 Hexanes/EtOAc)

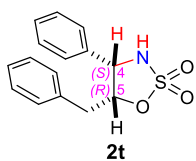

to afford product **2t** as a white solid (68% yield; 99% de). m.p. 184-186 °C.  $[\alpha]_{\text{D}}^{20} = +33.0^\circ$  ( $c = 1.1$ ,  $\text{CHCl}_3$ );  $^1\text{H}$  NMR (600 MHz,  $\text{Acetone-}D_6$ )  $\delta$  ppm 7.59 (d,  $J = 7.3$  Hz,

2H), 7.47 (dd,  $J = 10.2, 4.7$  Hz, 2H), 7.44-7.40 (m, 1H), 7.38 (br. s, 1H), 7.27 (t,  $J = 7.4$  Hz, 2H), 7.21 (t,  $J = 7.3$  Hz, 1H), 7.18 (d,  $J = 7.1$  Hz, 2H), 5.41 (ddd,  $J = 10.5, 6.0, 3.1$  Hz, 1H), 5.32 (d,  $J = 6.0$  Hz, 1H), 2.67 (dd,  $J = 14.8, 3.0$  Hz, 1H), 2.56 (dd,  $J = 14.8, 10.5$  Hz, 1H);  $^{13}\text{C}$  NMR (150 MHz, Acetone- $D_6$ )  $\delta$  ppm 137.6, 137.1, 130.0, 129.5, 129.4, 129.3, 128.7, 127.6, 87.8, 63.7, 37.5; IR (neat,  $\text{cm}^{-1}$ ): 3236, 2161, 1737, 1181; HRMS (ESI)  $m/z$  calcd for  $\text{C}_{15}\text{H}_{14}\text{NO}_3\text{S}^-$   $[\text{M}-\text{H}]^-$ : 288.0689, obsd: 288.0689; HPLC analysis: ee = 99%. Chiral AD-H (10% isopropanol - 90% hexanes, 1.0 mL/min): Major t = 19.26 min., Minor t = 22.69 min. 4-[*S*], 5-[*R*] absolute configuration of the product was determined by X-ray crystallography.

**Compound 2u** was synthesized following General Procedure B, and purified by flash silica gel

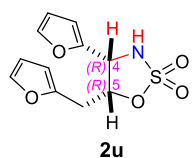

chromatography (4:1 Hexanes/Ethyl acetate), TLC  $R_f = 0.25$  (4:1 Hexanes/Ethyl acetate) to afford the desired product as white solid (92% yield; 99% de). m.p. 85-87 °C.  $[\alpha]_{\text{D}}^{20} = +2.7^\circ$  ( $c = 1.3$ ,  $\text{CHCl}_3$ );  $^1\text{H}$  NMR (500 MHz,  $\text{CDCl}_3$ )  $\delta$  ppm 7.48 (dd,  $J =$

1.7, 0.7 Hz, 1H), 7.33-7.30 (m, 1H), 6.52 (d,  $J = 3.3$  Hz, 1H), 6.43 (dd,  $J = 3.3, 1.9$  Hz, 1H), 6.28 (dd,  $J = 3.1, 1.9$  Hz, 1H), 6.08-6.05 (m, 1H), 5.30 (dt,  $J = 8.5, 5.5$  Hz, 1H), 5.06 (d,  $J = 5.8$  Hz, 1H), 4.86 (s, 1H), 2.99 (dd,  $J = 15.8, 8.5$  Hz, 1H), 2.79 (dd,  $J = 15.8, 5.2$  Hz, 1H);  $^{13}\text{C}$  NMR (150 MHz,  $\text{CDCl}_3$ )  $\delta$  ppm 148.7, 147.4, 143.9, 142.2, 111.2, 111.0, 110.7, 108.0, 83.4, 57.0; IR (neat,  $\text{cm}^{-1}$ ): 3285, 2980, 1347, 1185, 907, 734; HRMS (ESI)  $m/z$  calcd for  $\text{C}_{11}\text{H}_{12}\text{NO}_5\text{S}^+$   $[\text{M}+\text{H}]^+$ : 270.0431, obsd: 270.0427; HPLC analysis: ee = 98%. Chiral AD-H (7% isopropanol - 93% hexanes, 1.0 mL/min): Major t = 27.99 min., Minor t = 32.69 min. 4-[*R*], 5-[*R*] absolute configuration of the product was determined by X-ray crystallography.

**Compound 2v** was synthesized following General Procedure B, and purified by flash silica gel

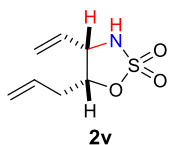

chromatography (4:1 Hexanes/Ethyl acetate), TLC  $R_f = 0.25$  (4:1 Hexanes/Ethyl acetate) to afford the desired product as colorless oil (84% yield; 99% de).  $[\alpha]_{\text{D}}^{20} = -16.0^\circ$  ( $c =$

0.4,  $\text{CHCl}_3$ );  $^1\text{H}$  NMR (500 MHz,  $\text{CDCl}_3$ )  $\delta$  ppm 5.93 (ddd,  $J = 17.1, 10.3, 7.8$  Hz, 1H), 5.78 (ddt,  $J = 17.2, 10.4, 6.8$  Hz, 1H), 5.47 (d,  $J = 9.6$  Hz, 1H), 5.46-5.44 (m, 1H), 5.23 (dt,  $J = 6.2, 1.2$  Hz, 1H), 5.20 (t,  $J = 1.2$  Hz, 1H), 4.92 (dt,  $J = 8.6, 5.4$  Hz, 1H), 4.70 (s, 1H), 4.44-4.35 (m, 1H), 2.64-

2.56 (m, 1H), 2.43-2.35 (m, 1H);  $^{13}\text{C}$  NMR (150 MHz,  $\text{CDCl}_3$ )  $\delta$  ppm 131.2, 130.4, 121.8, 119.8, 85.6, 62.1, 34.2; IR (neat,  $\text{cm}^{-1}$ ): 3261, 1738, 1348, 1186; HRMS (ESI)  $m/z$  calcd for  $\text{C}_7\text{H}_{12}\text{NO}_3\text{S}^+$   $[\text{M}+\text{H}]^+$ : 190.0532, obsd: 190.0533. Ee was determined to be 98% by derivatization into **3r** (for the detailed synthesis of **3r**, please see the section for ring opening of *N*-Boc-**2v**).

**Compound 2w** was synthesized following General Procedure B on 0.2 mmol scale, and purified by

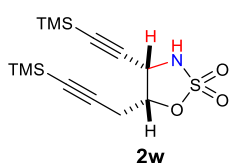

flash silica gel chromatography (7:1, Hexanes: Ethyl acetate), TLC  $R_f$  = 0.35 (7: 1

Hexanes: Ethyl acetate) to afford the desired product as colorless oil (84% yield;

99% de).  $[\alpha]_{\text{D}}^{20} = +17.1^\circ$  ( $c = 1.1$ ,  $\text{CHCl}_3$ );  $^1\text{H}$  NMR (600 MHz,  $\text{CDCl}_3$ )  $\delta$  ppm 4.90-

4.81 (m, 2H), 4.74 (dd,  $J = 8.8, 6.2$  Hz, 1H), 2.87 (d,  $J = 5.0$  Hz, 2H), 0.22 (s, 9H), 0.18 (s, 9H);  $^{13}\text{C}$

NMR (150 MHz,  $\text{CDCl}_3$ )  $\delta$  ppm 99.6, 96.7, 95.1, 90.1, 82.0, 51.4, 23.2, -0.1, -0.4; IR (neat,  $\text{cm}^{-1}$ ): 3270,

2960, 2182, 1410, 1250, 1193, 840; HRMS (ESI)  $m/z$  calcd for  $\text{C}_{13}\text{H}_{24}\text{NO}_3\text{SSi}_2^+$   $[\text{M}+\text{H}]^+$ : 330.1010,

obsd: 330.1018; HPLC analysis: ee = 98%. Chiral AD-H (4% isopropanol - 96% hexanes, 1.0 mL/min):

Major  $t = 7.44$  min., Minor  $t = 6.77$  min.

**Compound 2x** was synthesized following General Procedure B, and purified by flash silica gel

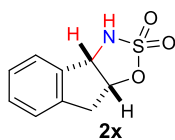

chromatography (eluent: 15:1 DCM/EtOAc), TLC  $R_f$  = 0.45 (10: 1 DCM/EtOAc) to

afford the desired product as white solid (95% yield; 99% de). m.p. 130-131  $^\circ\text{C}$ .  $[\alpha]_{\text{D}}^{20} =$

$-129.0^\circ$  ( $c = 0.2$ ,  $\text{CHCl}_3$ ).  $^1\text{H}$  NMR (500 MHz, Acetone- $D_6$ )  $\delta$  ppm 7.42 (d,  $J = 7.2$  Hz,

1H), 7.37-7.25 (m, 3H), 7.02 (s, 1H), 5.63 (td,  $J = 6.3, 1.5$  Hz, 1H), 5.46 (d,  $J = 6.0$  Hz, 1H), 3.49 (dd,

$J = 18.0, 6.3$  Hz, 1H), 3.31 (d,  $J = 17.9$  Hz, 1H);  $^{13}\text{C}$  NMR (150 MHz, Acetone- $D_6$ )  $\delta$  ppm 140.9, 130.1,

128.4, 126.5, 126.0, 108.4, 87.1, 65.3, 38.2; IR (neat,  $\text{cm}^{-1}$ ): 1155; HRMS (ESI)  $m/z$  calcd for

$\text{C}_9\text{H}_9\text{NNaO}_3\text{S}^+$   $[\text{M}+\text{Na}]^+$ : 234.0195, obsd 234.0197; HPLC analysis: ee = 98%. Chiral AD-H (7%

isopropanol - 93% hexanes, 1.0 mL/min): Major  $t = 45.69$  min., Minor  $t = 55.40$  min.

**Compound 2y** was synthesized following General Procedure B, and purified by flash silica gel

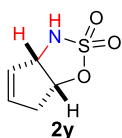

chromatography (4:1 Hexanes/Ethyl acetate), TLC  $R_f$  = 0.35 (4:1 Hexanes/Ethyl acetate) to

afford the desired product as colorless oil (93% yield; 99% de)  $[\alpha]_{\text{D}}^{20} = -5.2^\circ$  ( $c = 1.0$ ,  $\text{CHCl}_3$ );

$^1\text{H}$  NMR (400 MHz,  $\text{CDCl}_3$ )  $\delta$  ppm 6.06-5.92 (m, 1H), 5.77-5.68 (m, 1H), 5.27 (td,  $J = 6.2, 2.5$  Hz, 1H), 4.83-4.73 (m, 1H), 4.34 (s, 1H), 2.87-2.72 (m, 2H);  $^{13}\text{C}$  NMR (125 MHz,  $\text{CDCl}_3$ )  $\delta$  ppm 134.1, 128.1, 83.8, 65.6, 38.6; IR (neat,  $\text{cm}^{-1}$ ): 1365, 1194, 903, 725; HRMS (ESI)  $m/z$  calcd for  $\text{C}_5\text{H}_8\text{NO}_3\text{S}^+$   $[\text{M}+\text{H}]^+$ : 162.0219, obsd: 162.0222.

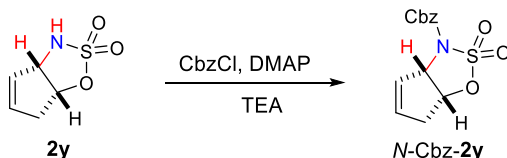

**Compound *N*-Cbz-**2y**** was prepared according to the following procedure. To a solution of (3*aS*,6*aR*)-3,3*a*,6,6*a*-tetrahydrocyclopenta[*d*][1,2,3]oxathiazole 2,2-dioxide (**2y**) (16.2 mg, 0.1 mmol, 1.0 equiv) in THF (0.4 mL); DMAP (12.0 mg, 0.1 mmol, 1.0 equiv),  $\text{Et}_3\text{N}$  (278  $\mu\text{L}$ , 2.00 mmol, 20 equiv), and benzyl chloroformate (162 mg, 0.95 mmol, 9.5 equiv) were added and reaction was stirred for 2h. The solvent was then removed and the residue was purified by flash silica gel chromatography (eluent: 4:1 Hexanes/ $\text{EtOAc}$ ) to afford product *N*-Cbz-**2y** as colorless oil (64%), TLC  $R_f = 0.30$  (4:1 Hexanes/ $\text{EtOAc}$ ).  $[\alpha]_{\text{D}}^{20} = +135.0^\circ$  ( $c = 0.6$ ,  $\text{CHCl}_3$ );  $^1\text{H}$  NMR (400 MHz,  $\text{CDCl}_3$ )  $\delta$  ppm 7.38-7.25 (m, 5H), 6.00-5.94 (m, 1H), 5.87 (dd,  $J = 5.8, 1.7$  Hz, 1H), 5.31-5.23 (m, 3H), 5.11 (dd,  $J = 6.0, 1.2$  Hz, 1H), 2.82-2.72 (m, 2H);  $^{13}\text{C}$  NMR (150 MHz,  $\text{CDCl}_3$ )  $\delta$  ppm 150.2, 134.6, 132.7, 128.9, 128.8, 128.1, 127.6, 80.6, 69.5, 66.7, 37.9; IR (neat,  $\text{cm}^{-1}$ ): 1706, 1214, 748; HRMS (ESI)  $m/z$  calcd for  $\text{C}_{13}\text{H}_{14}\text{NO}_5\text{S}^+$   $[\text{M}+\text{H}]^+$ : 296.0587, obsd: 296.0588; HPLC analysis: ee = 97%. Chiral ODH (10% isopropanol - 90% hexanes, 1.0 mL/min): Major t = 24.00 min., Minor t = 21.99 min.

**Compound **2z**** was synthesized following General Procedure B starting from 1.0 mmol scale, and purified by flash silica gel chromatography (eluent: 15: 1 DCM/ $\text{EtOAc}$ ), TLC  $R_f = 0.40$

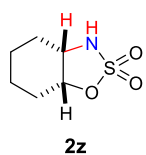

(10: 1 DCM/ $\text{EtOAc}$ ) to afford the desired product as a colorless oil (79% yield; 99% de).

$[\alpha]_{\text{D}}^{20} = +11.0^\circ$  ( $c = 0.9$ ,  $\text{CHCl}_3$ );  $^1\text{H}$  NMR (400 MHz,  $\text{CDCl}_3$ )  $\delta$  ppm 4.88 (q,  $J = 4.6$  Hz, 1H), 4.63 (s, 1H), 3.84-3.78 (m, 1H), 2.28-2.10 (m, 1H), 2.01-1.87 (m, 2H), 1.87-1.74 (m, 1H), 1.74-1.59 (m, 2H), 1.54-1.41 (m, 1H), 1.38-1.32 (m, 1H);  $^{13}\text{C}$  NMR (100 MHz,  $\text{CDCl}_3$ )  $\delta$  ppm 84.0, 56.4, 27.5, 27.3, 21.4, 19.6; IR (neat,  $\text{cm}^{-1}$ ): 1348, 1185; HRMS (ESI)  $m/z$  calcd for  $\text{C}_6\text{H}_{11}\text{NNaO}_3\text{S}^+$   $[\text{M}+\text{Na}]^+$ : 200.0357, obsd: 200.0353.



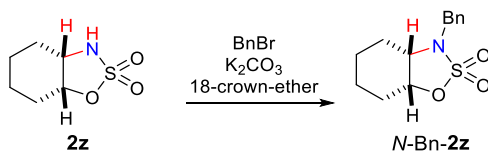

**Compound N-Bn-2z** was prepared according to the following procedure. To a solution of **2z** (10 mg)

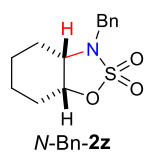

in CH<sub>3</sub>CN (1 mL) was added 18-crown-ether (10 mg), BnBr (20 mg) and powdered K<sub>2</sub>CO<sub>3</sub> (60 mg). The reaction mixture was vigorously stirred for 1 hour prior to being filtered. The filtrate was concentrated in vacuum and the crude product was purified by flash column

chromatography (4:1 Hexanes/Ethyl acetate) to afford the product **N-Bn-2z** (67% yield).  $[\alpha]_{\text{D}}^{20} = +21.0^\circ$  ( $c = 0.7$ , CHCl<sub>3</sub>); <sup>1</sup>H NMR (250 MHz, CDCl<sub>3</sub>)  $\delta$  ppm 7.52-7.28 (m, 5H), 4.87 (dd,  $J = 8.3, 4.1$  Hz, 1H), 4.33 (d,  $J = 14.5$  Hz, 1H), 4.21 (d,  $J = 14.5$  Hz, 1H), 3.46-3.36 (m, 1H), 2.32-2.17 (m, 1H), 1.90-1.76 (m, 2H), 1.75-1.38 (m, 4H), 1.20-0.98 (m, 1H); <sup>13</sup>C NMR (62.5 MHz, CDCl<sub>3</sub>)  $\delta$  ppm 136.2, 128.9, 128.6, 128.4, 80.7, 58.4, 48.1, 27.8, 25.2, 21.4, 19.8; IR (neat, cm<sup>-1</sup>): 1245, 1160; HRMS (ESI)  $m/z$  calcd for C<sub>13</sub>H<sub>17</sub>NNaO<sub>3</sub>S<sup>+</sup> [M+Na]<sup>+</sup>: 290.0827, obsd: 290.0830; HPLC analysis: ee = 94%. Chiral AD-H (10% isopropanol - 90% hexanes, 0.7 mL/min): Major t = 15.91 min., Minor t = 14.20 min.

**Compound 2aa** was synthesized following General Procedure B, and purified by flash silica gel

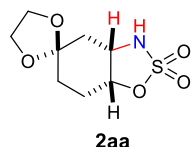

chromatography (eluent: 15: 1 DCM/EtOAc), TLC R<sub>f</sub> = 0.30 (10: 1 DCM/EtOAc) to afford the desired product as a colorless oil (89% yield; 99% de).  $[\alpha]_{\text{D}}^{20} = +8.7^\circ$  ( $c = 0.6$ , CHCl<sub>3</sub>). <sup>1</sup>H NMR (400 MHz, CDCl<sub>3</sub>)  $\delta$  ppm 5.34 (d,  $J = 10.1$  Hz, 1H), 4.84-4.71 (m, 1H), 4.14-4.08 (m, 1H), 4.05-3.82 (m, 4H), 2.34-2.07 (m, 3H), 2.00-1.96 (m, 1H), 1.79-1.74 (m, 1H), 1.58-1.50 (m, 1H); <sup>13</sup>C NMR (100 MHz, CDCl<sub>3</sub>)  $\delta$  ppm 106.7, 82.9, 64.9, 64.5, 56.2, 33.7, 29.9, 24.6;

IR (neat, cm<sup>-1</sup>): 1243, 1175; HRMS (ESI)  $m/z$  calcd for C<sub>8</sub>H<sub>13</sub>NNaO<sub>5</sub>S<sup>+</sup> [M+Na]<sup>+</sup>: 258.0407, obsd: 258.0410.

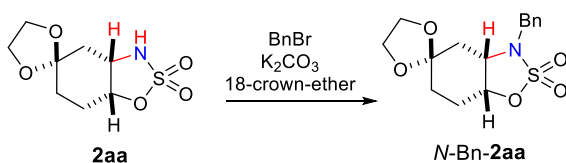

**Compound *N*-Bn-2aa** was prepared according to the following procedure. To a solution of **2aa** (10 mg)

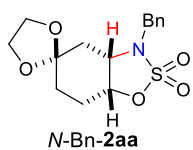

in CH<sub>3</sub>CN (1 mL) was added 18-crown-ether (10 mg), BnBr (20 mg) and powdered K<sub>2</sub>CO<sub>3</sub> (60 mg). The reaction mixture was vigorously stirred for 1 hour prior to being filtered. The filtrate was concentrated in vacuum and the crude product was purified by

flash column chromatography (2:1 Hexanes/Ethyl acetate) to afford the product *N*-Bn-**2aa** as white solid (73% yield).  $[\alpha]_{\text{D}}^{20} = +122.0^\circ$  ( $c = 0.4$ , CHCl<sub>3</sub>); <sup>1</sup>H NMR (400 MHz, CDCl<sub>3</sub>)  $\delta$  ppm 7.39-7.32 (m, 5H), 4.88 (dd,  $J = 6.8, 3.3$  Hz, 1H), 4.37, 4.11 (AB q,  $J = 14.4$  Hz, each 1 H), 3.91 (dd,  $J = 9.0, 4.3$  Hz, 2H), 3.85-3.67 (m, 2H), 3.57 (ddd,  $J = 10.8, 6.3, 4.2$  Hz, 1H), 2.36-2.18 (m, 1H), 2.10 (dd,  $J = 13.2, 11.0$  Hz, 1H), 2.02-1.73 (m, 3H), 1.67-1.54 (m, 1H); <sup>13</sup>C NMR (100 MHz, CDCl<sub>3</sub>)  $\delta$  ppm 134.8, 128.8, 128.4, 128.3, 107.1, 79.1, 64.4, 58.2, 48.1, 33.8, 27.9, 24.5; IR(neat): 1176; HRMS (ESI)  $m/z$  calcd for C<sub>15</sub>H<sub>19</sub>NNaO<sub>5</sub>S<sup>+</sup> [M+Na]<sup>+</sup>: 348.0876, obsd: 348.0880; HPLC analysis: ee = 95%. Chiral AD-H (20% isopropanol - 80% hexanes, 0.8 mL/min): Major t = 36.52 min., Minor t = 22.94 min.

**Compound 2ab** was synthesized following General Procedure B, and purified by flash silica gel

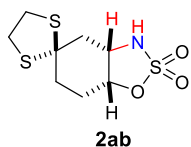

chromatography (4:1 Hexanes/Ethyl acetate), TLC R<sub>f</sub> = 0.25 (4:1 Hexanes/Ethyl acetate) to afford product **2ab** as white solid (91% yield; 99% de).  $[\alpha]_{\text{D}}^{20} = +9.7^\circ$  ( $c = 0.8$ , CHCl<sub>3</sub>). <sup>1</sup>H NMR (600 MHz, CDCl<sub>3</sub>)  $\delta$  ppm 5.08 (d,  $J = 5.1$  Hz, 1H), 4.94-4.87 (m, 1H), 3.97 (td,  $J = 10.2, 5.0$  Hz, 1H), 3.51-3.18 (m, 4H), 2.50 (dd,  $J = 14.0, 9.7$  Hz, 1H), 2.42-2.30 (m, 2H), 2.27-2.19 (m, 1H), 2.17-2.07 (m, 1H), 2.06-1.95 (m, 1H); <sup>13</sup>C NMR (150 MHz, CDCl<sub>3</sub>)  $\delta$  ppm 82.3, 64.6, 57.0, 42.5, 39.3, 38.6, 35.0, 27.3; IR (neat, cm<sup>-1</sup>): 3276, 1357, 768; HRMS (ESI)  $m/z$  calcd for C<sub>8</sub>H<sub>14</sub>NO<sub>3</sub>S<sub>3</sub><sup>+</sup> [M+H]<sup>+</sup>: 268.0130, obsd: 268.0117.

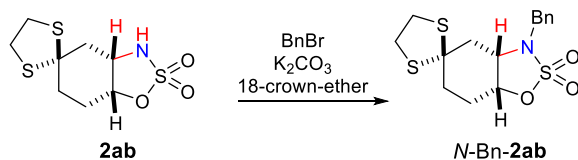

**Compound *N*-Bn-2ab** was prepared according to the following procedure. To a solution of **2ab** (16 mg)

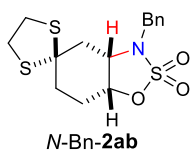

in CH<sub>3</sub>CN (1 mL) was added 18-crown-ether (10 mg), BnBr (20 mg) and powdered K<sub>2</sub>CO<sub>3</sub> (60 mg). The reaction mixture was vigorously stirred for 1 h prior to being filtered. The filtrate was concentrated in vacuum and the crude product was purified

by flash column chromatography (4:1 Hexanes/Ethyl acetate) to afford the product as white solid (98% yield). m.p. 102-104 °C.  $[\alpha]_{\text{D}}^{20} = +36.0^\circ$  ( $c = 1.3$ ,  $\text{CHCl}_3$ );  $^1\text{H NMR}$  (600 MHz,  $\text{CDCl}_3$ )  $\delta$  ppm 7.43-7.31 (m, 5H), 4.94-4.84 (m, 1H), 4.40, 4.17 (AB q,  $J = 14.4$  Hz, each 1 H), 3.56 (ddd,  $J = 10.3, 5.8, 4.2$  Hz, 1H), 3.35-3.24 (m, 3H), 3.24-3.16 (m, 1H), 2.47 (dd,  $J = 13.5, 10.7$  Hz, 1H), 2.38-2.27 (m, 2H), 2.20 (tt,  $J = 12.4, 6.0$  Hz, 1H), 2.06-1.99 (m, 1H), 1.96 (ddt,  $J = 13.5, 4.7, 2.5$  Hz, 1H);  $^{13}\text{C NMR}$  (150 MHz,  $\text{CDCl}_3$ )  $\delta$  ppm 134.9, 129.0, 128.6, 128.5, 78.5, 64.6, 58.8, 48.5, 40.5, 39.4, 38.3, 35.1, 27.1; IR (neat,  $\text{cm}^{-1}$ ): 1736, 1215, 772; HRMS (ESI)  $m/z$  calcd for  $\text{C}_{15}\text{H}_{20}\text{NO}_3\text{S}_3^+$   $[\text{M}+\text{H}]^+$ : 358.0600, obsd: 358.0591; HPLC analysis: ee >99%. Chiral AD-H (20% isopropanol - 80% Hexanes, 1.0 mL/min): Major t = 22.88 min., Minor t = 16.85 min.

**Compound 2ac** was synthesized following General Procedure B, and purified by flash silica gel

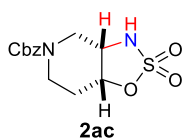

chromatography (eluent: 15: 1 DCM/Ether), TLC  $R_f = 0.30$  (10: 1 DCM/Ether) to afford the desired product as a colorless oil (83% yield; 99% de) (**note: this compound is acid-sensitive**).  $[\alpha]_{\text{D}}^{20} = -79.0^\circ$  ( $c = 0.2$ ,  $\text{CH}_3\text{OH}$ );  $^1\text{H NMR}$  (400 MHz,  $\text{CD}_3\text{OD}$ )  $\delta$  ppm

7.41-7.23 (m, 5H), 5.78-5.74 (m, 1H), 5.16-5.09 (s, 2H), 5.07-5.02 (m, 1H), 4.07-4.02 (m, 1H), 3.60-3.40 (m, 1H), 3.19-2.96 (m, 1H), 2.15-1.98 (m, 1H), 1.97-1.90 (m, 3H);  $^{13}\text{C NMR}$  (150 MHz,  $\text{C}_6\text{D}_6$ )  $\delta$  ppm 136.6, 128.9, 128.7, 128.4, 128.0, 77.5, 68.0, 61.7, 34.7, 29.7, 26.1; IR (neat,  $\text{cm}^{-1}$ ): 1738, 1365, 1228, 747; HRMS (ESI)  $m/z$  calcd for  $\text{C}_{13}\text{H}_{16}\text{N}_2\text{NaO}_5\text{S}^+$   $[\text{M}+\text{Na}]^+$ : 335.0672, obsd: 335.0677; HPLC analysis: ee = 99%. Chiral OD-H (20% isopropanol - 80% hexanes, 1.0 mL/min): Major t = 35.47 min., Minor t = 26.06 min.

**Compound 2ad** was synthesized following General Procedure B with 4 mol % of  $[\text{Co}(\mathbf{P14})]$  at 40 °C

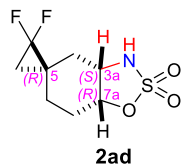

for 48 h, and purified by flash silica gel chromatography (eluent: 5:1 Hexanes/EtOAc), TLC  $R_f = 0.30$  (3:1 Hexanes/EtOAc) to afford the desired product as a white solid (75% yield; 99% de).  $[\alpha]_{\text{D}}^{20} = -73.8^\circ$  ( $c = 0.8$ ,  $\text{CHCl}_3$ ).  $^1\text{H NMR}$  (500 MHz,  $\text{CDCl}_3$ )  $\delta$  ppm

4.99 (t,  $J = 3.7$  Hz, 1H), 4.91-4.78 (m, 1H), 3.83 (tq,  $J = 9.4, 4.4$  Hz, 1H), 2.46-2.24 (m, 2H), 2.07-1.94 (m, 1H), 1.92-1.76 (m, 2H), 1.44 (ddt,  $J = 13.8, 4.9, 2.4$  Hz, 1H), 1.22 (ddd,  $J = 24.7, 11.7, 7.9, 3.9$  Hz, 2H);  $^{13}\text{C NMR}$  (125 MHz,  $\text{CDCl}_3$ )  $\delta$  ppm 115.4 (t,  $J = 289.0$  Hz), 83.5, 56.3, 30.9 (d,  $J = 5.0$  Hz), 26.8,

25.4 (t,  $J = 9.4$  Hz), 22.6 (d,  $J = 4.7$  Hz), 22.1 (t,  $J = 10.2$  Hz);  $^{19}\text{F}$  NMR (470 MHz,  $\text{CDCl}_3$ )  $\delta$  ppm -138.6 to -139.9 (m, 1F), -141.5 (ddt,  $J = 156.7, 11.5, 4.9$  Hz, 1F); IR (neat,  $\text{cm}^{-1}$ ): 3287, 2669, 1738, 1474, 1183, 818; HRMS (ESI)  $m/z$  calcd for  $\text{C}_8\text{H}_{12}\text{F}_2\text{NO}_3\text{S}^+$   $[\text{M}+\text{H}]^+$ : 240.0501, obsd: 240.0511.

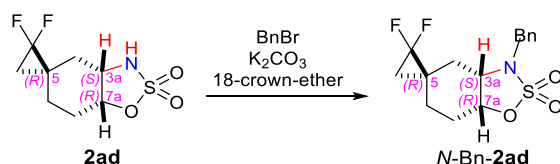

**Compound *N*-Bn-2ad** was prepared according to the following procedure. To a solution of **2ad** (10 mg)

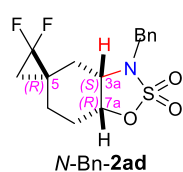

in  $\text{CH}_3\text{CN}$  (1 mL) was added 18-crown-ether (10 mg), BnBr (15 mg) and powdered  $\text{K}_2\text{CO}_3$  (40 mg). The reaction mixture was vigorously stirred for 16 h prior to being filtered. The filtrate was concentrated in vacuum and the crude product was purified by

flash column chromatography (5:1 Hexanes/Ethyl acetate) to afford the product *N*-Bn-**2ad** as white solid

(79% yield). m.p. 101-103 °C.  $[\alpha]_{\text{D}}^{20} = +2.4^\circ$  ( $c = 0.8$ ,  $\text{CHCl}_3$ );  $^1\text{H}$  NMR (600 MHz,  $\text{CDCl}_3$ )  $\delta$  ppm 7.43-7.21 (m, 5H), 4.95 (q,  $J = 3.6$  Hz, 1H), 4.37, 4.17 (AB q,  $J = 14.3$  Hz, each 1H), 3.45 (ddd,  $J = 10.5, 6.2, 4.3$  Hz, 1H), 2.39-2.22 (m, 2H), 1.99 (dddd,  $J = 13.5, 10.4, 6.2, 3.2$  Hz, 1H), 1.85-1.72 (m, 1H), 1.67 (dd,  $J = 13.9, 6.1$  Hz, 1H), 1.45-1.34 (m, 1H), 1.19 (ddd,  $J = 12.5, 7.8, 3.7$  Hz, 1H), 1.07 (ddd,  $J = 12.3, 7.8, 3.6$  Hz, 1H);  $^{13}\text{C}$  NMR (150 MHz,  $\text{CDCl}_3$ )  $\delta$  ppm 134.7, 129.1, 128.7, 128.6, 115.3 (t,  $J = 288.0$  Hz), 79.7, 57.8, 48.5, 28.5 (d,  $J = 4.7$  Hz), 26.9, 25.0 (t,  $J = 9.4$  Hz), 22.8 (d,  $J = 4.9$  Hz), 22.1 (t,  $J = 10.1$  Hz);  $^{19}\text{F}$  NMR (564 MHz,  $\text{cdcl}_3$ )  $\delta$  ppm -139.0 to -139.8 (m), -141.64 (dddd,  $J = 155.7, 9.7, 6.5, 3.4$  Hz); IR (neat,  $\text{cm}^{-1}$ ): 2924, 1473, 1338, 1184, 829; HRMS (ESI)  $m/z$  calcd for  $\text{C}_{15}\text{H}_{18}\text{F}_2\text{NO}_3\text{S}^+$   $[\text{M}+\text{H}]^+$ : 330.0970, obsd: 330.0976; HPLC analysis: ee = 97%. Chiral AD-H (10% isopropanol - 90% hexanes, 1.0 mL/min): Major t = 13.30 min., Minor t = 12.08 min. 3a-[*S*], 5-[*R*], 7a-[*R*] absolute configuration of the product was determined by X-ray crystallography.

**Compound 2ae** was synthesized following General Procedure B, and purified by flash silica gel

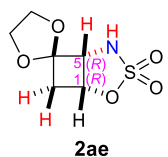

chromatography (2:1, Hexanes/Ethyl acetate), TLC  $R_f = 0.25$  (1:1 Hexanes/Ethyl acetate) to afford the desired product as white solid (74% yield; 99% de). m.p. 67-69 °C.  $[\alpha]_{\text{D}}^{20} = -10.5^\circ$  ( $c = 2.0$ ,  $\text{CHCl}_3$ );  $^1\text{H}$  NMR (600 MHz,  $\text{CDCl}_3$ )  $\delta$  ppm 5.01 (br. s, 1H), 4.96 (td,  $J = 6.2, 3.1$  Hz, 1H), 4.29 (d,  $J = 3.0$  Hz, 1H), 4.08 (ddd,  $J = 7.8, 6.5, 5.0$  Hz, 1H), 4.00 (dd,  $J = 14.0, 7.4$

Hz, 1H), 3.93 (td,  $J = 7.1, 4.9$  Hz, 1H), 3.88 (dd,  $J = 14.7, 7.3$  Hz, 1H), 2.99 (ddd,  $J = 15.8, 6.4, 3.1$  Hz, 1H), 2.93-2.77 (m, 1H);  $^{13}\text{C}$  NMR (150 MHz,  $\text{CDCl}_3$ )  $\delta$  ppm 103.1, 70.4, 65.7, 65.1, 64.1, 42.0; IR (neat,  $\text{cm}^{-1}$ ): 3259, 1411, 1297, 926; HRMS (DART)  $m/z$  calcd for  $\text{C}_6\text{H}_{10}\text{NO}_5\text{S}^+$   $[\text{M}+\text{H}]^+$  208.0274, obsd: 208.0271. 1- $[R]$ , 5- $[R]$  absolute configuration of the product was determined by X-ray crystallography. The ee was not determined due to the fact that no other catalysts showed reactivities to generate this product.

### 3.2. Figure S3. Ligand Effect (Open vs Bridged Catalysts) with Selected Substrates.

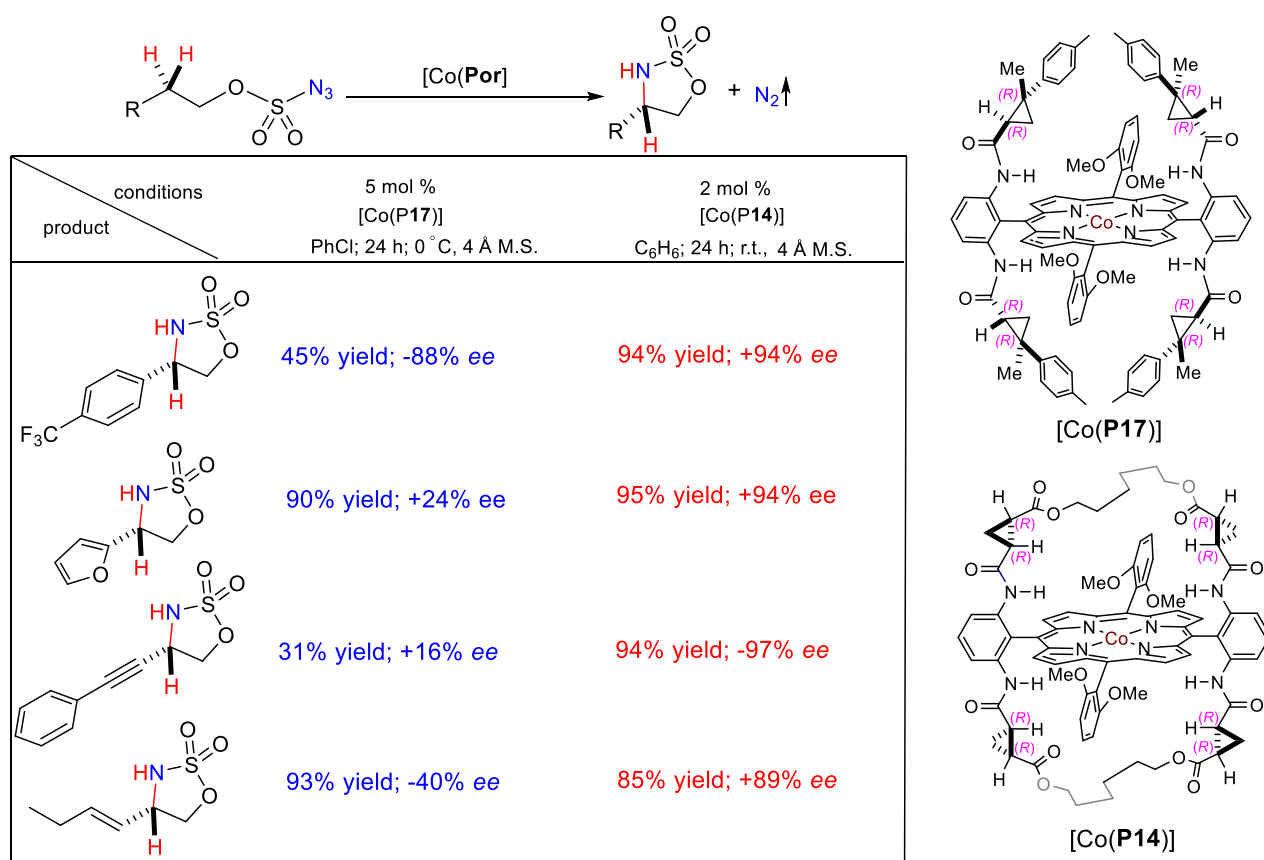

**Note:** The optimal bridged catalyst [Co(P14)] turned out essential for this broad C–H substrate scope. At the early stage of this study, the open catalyst [Co(P17)],<sup>4</sup> which was the derivative of [Co(P7)], was identified as a promising catalyst candidate. However, the amination with this catalyst only led to the effective enantiocontrol of benzylic C–H substrates. The amination of other types of C–H substrates did not provide high enough enantioselectivities. The project was opened out after we developed bridged catalysts. Please see the **Figure S3** for more details.

## 4. Mechanistic Studies on Co(II)-Catalyzed Radical 1,5-C–H Amination

### 4.1. EPR Studies

#### 4.1.1. Procedure for EPR Experiment

Catalyst [Co(**P14**)] (1.6 mg, 0.001 mmol) was placed into an oven-dried EPR tube. This EPR tube was then capped with a red rubber septum and was fasten with parafilm. The tube was evacuated and backfilled with nitrogen for three times. Then azide **1a** (12 mg, 0.05 mmol in 0.5 mL of anhydrous benzene) was added into this tube through a gas-tight syringe. The cap of EPR tube was further sealed with vacuum grease. The reaction mixture was shaken well at room temperature for 40 mins. Then the sample was ready for EPR experiment at room temperature.

#### 4.1.2. Characterization of $\alpha$ -Co(III)-Aminyl Radical **I** and $\epsilon$ -Co(III)-Alkyl Radical **II** by EPR

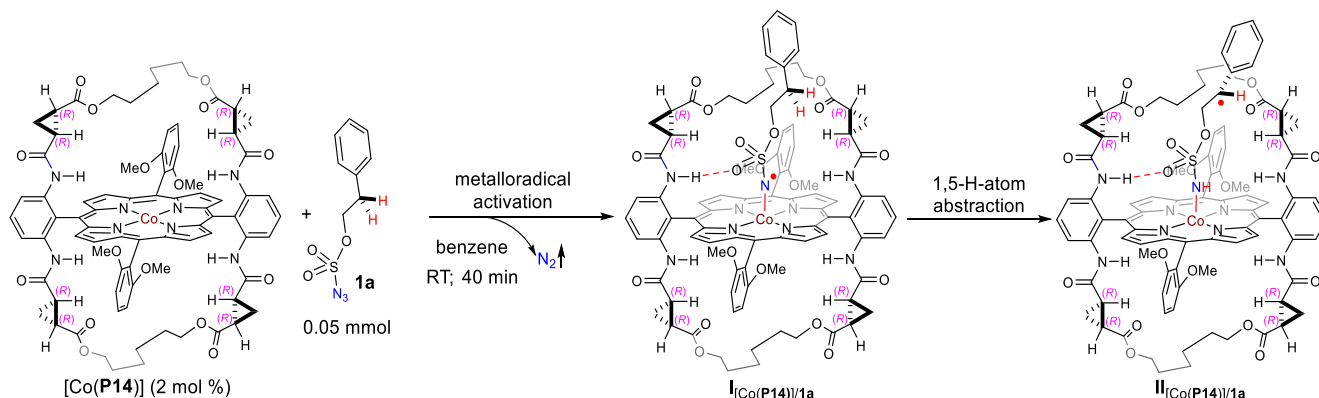

X-band EPR spectra were recorded on a Bruker EMX-Plus spectrometer (Bruker BioSpin). Simulations of the EPR spectra were performed by iteration of the isotropic  $g$ -values and line widths using the EPR simulation program SpinFit in Xenon. Experimental X-band EPR isotropic spectra of  $\alpha$ -Co(III)-Aminyl Radical **I**<sub>[Co(**P14**)]/1a</sub> and  $\epsilon$ -Co(III)-alkyl radical **II**<sub>[Co(**P14**)]/1a</sub> in toluene were recorded at r.t. (Freq = 9.42731 GHz; mod. amp. = 1 G; microwave power = 63.25 mW) (**Figure S4**).

4.1.3. Figure S4. Experimental and Simulated X-Band EPR Spectra for  $\alpha$ -Co(III)-Aminyl Radical  $\text{I}_{[\text{Co}(\text{P14})]/1\text{a}}$  and  $\epsilon$ -Co(III)-Alkyl Radical  $\text{II}_{[\text{Co}(\text{P14})]/1\text{a}}$  in Benzene at RT

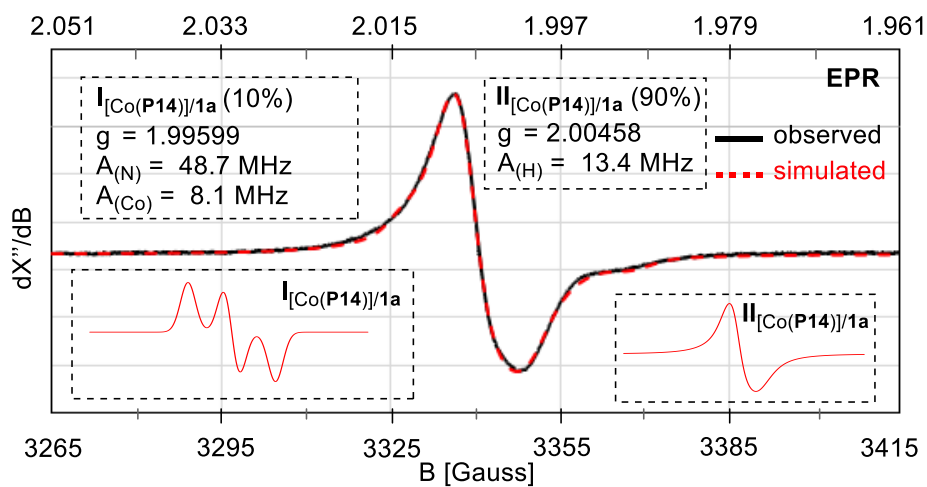

$$A_{(\text{N})}: 17.446 \times 1.99599 \times 1.399611451 = 48.7 \text{ MHz}$$

$$A_{(\text{Co})}: 2.893 \times 1.99599 \times 1.399611451 = 8.1 \text{ MHz}$$

$$A_{(\text{H})}: 4.788 \times 2.00458 \times 1.399611451 = 13.4 \text{ MHz}$$

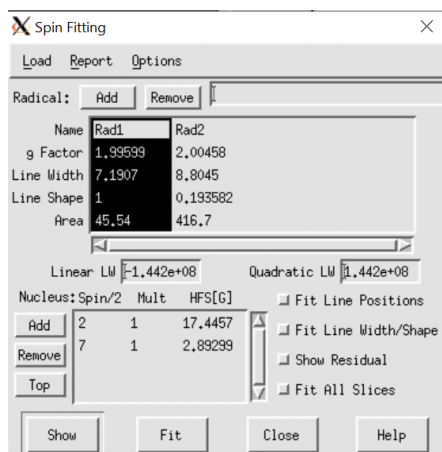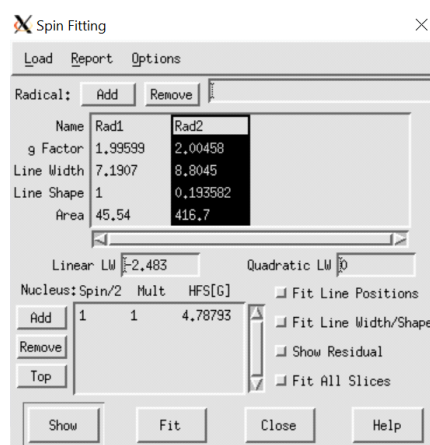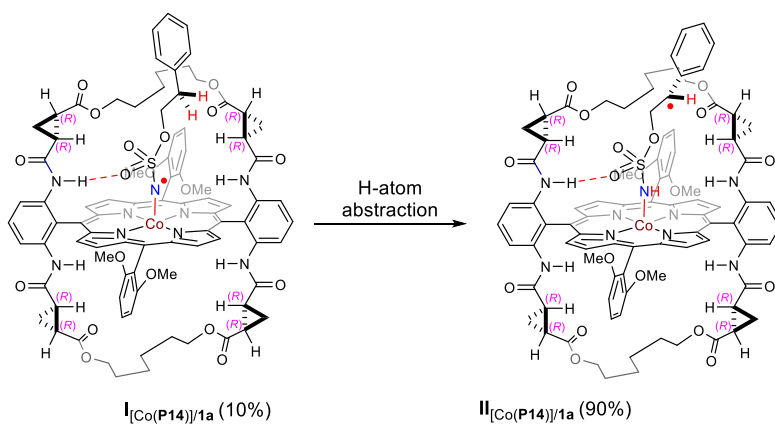

From experimental:  $g_{\text{iso}}$ : 2.00522

From simulation:  $g_{\text{iso}}$ : 1.99599; 2.00458

In addition to the minor species of  $\alpha$ -Co(III)-Aminyl Radical  $I_{[Co(P14)]/1a}$ , the major species was proposed to be  $\varepsilon$ -Co(III)-alkyl radical  $II_{[Co(P14)]/1a}$  generated through 1,5-HAA, which is consistent with our experimental observation of the high reactivity with  $[Co(P14)]$ .

## 4.2. HRMS Studies

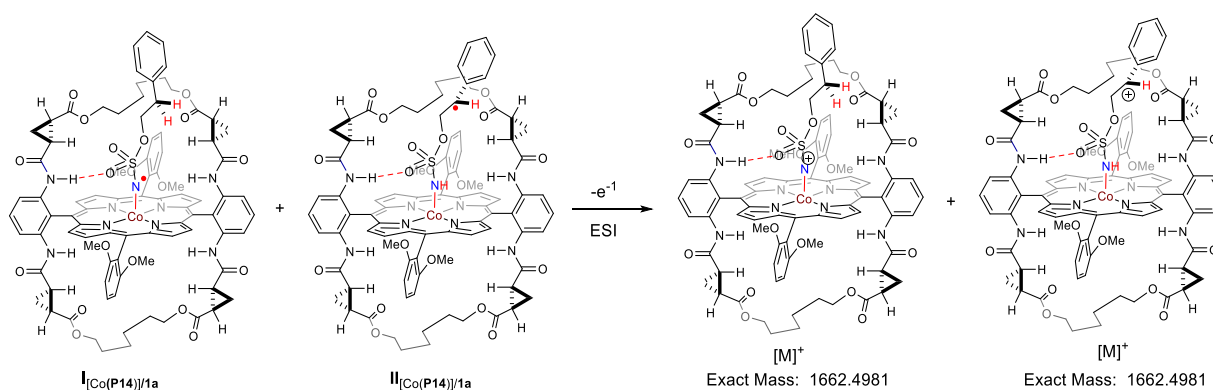

### 4.2.1. Procedure for HRMS Studies

Catalyst  $[Co(P14)]$  (1 mg) was dissolved into 1.0 mL of anhydrous benzene. Azide **1a** (0.1 mmol) was dissolved into 1.0 mL of anhydrous benzene. These two solutions were mixed in situ on a filter paper for direct detection of molecular ion peak by ESI-MS. The high-resolution mass spectra in the absence of any additives such as formic acids that commonly act as electron carriers for ionization allowed for the detection of the molecular ion signals corresponding to the  $\alpha$ -Co(III)-aminyl radical  $I_{[Co(P14)]/1a}$  and  $\varepsilon$ -Co(III)-alkyl radical  $II_{[Co(P14)]/1a}$  ( $[M]^+$   $m/z = 1662.4981$  (observed)), by the loss of one electron (**Figure S5**).



4.2.2. Figure S5. Observed and Simulated DART-MS Spectra with Isotope Distribution (Corresponding to  $[\alpha\text{-Co(III)-Aminyl Radical I}_{[\text{Co}(\text{P14})]/1\text{a}} - \text{e}^{-1}]^+$  and  $[\varepsilon\text{-Co(III)-Alkyl Radical II}_{[\text{Co}(\text{P14})]/1\text{a}} - \text{e}^{-1}]^+$  ( $[\text{M}]^+$   $m/z = 1662.4981$ ).

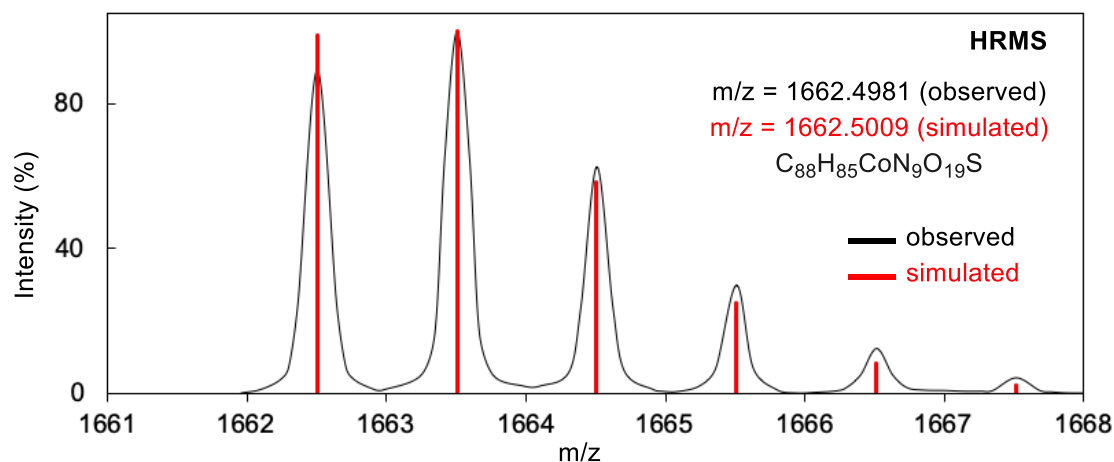

### 4.3. Kinetic Isotope Effect Experiment

#### 4.3.1. Synthesis and Characterization of Optically Pure Alkoxysulfonyl Azides

**(R)-2-phenylethyl-2-d sulfurazidate ((R)-1a<sub>D</sub>)** was synthesized following General Procedure A, from

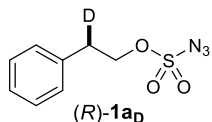

**(R)-2-phenylethyl-2-d-1-ol** (123 mg, 0.99 mmol)<sup>12</sup> and purified by flash silica gel chromatography (eluent: 40: 1 hexanes/EtOAc), TLC  $R_f = 0.65$  (20:1

Hexanes/EtOAc) to afford 170 mg of desired product as a colorless oil (75% yield). <sup>1</sup>H NMR (600 MHz, CDCl<sub>3</sub>)  $\delta$  ppm 7.35 (t,  $J = 7.4$  Hz, 2H), 7.28 (t,  $J = 7.4$  Hz, 1H), 7.24 (d,  $J = 7.1$  Hz, 2H), 4.55 (d,  $J = 6.8$  Hz, 2H), 3.09 (tt,  $J = 6.8, 3.7$  Hz, 1H); <sup>13</sup>C NMR (150 MHz, CDCl<sub>3</sub>)  $\delta$  ppm 135.5, 129.1, 129.0, 127.5, 75.0, 34.9 (t,  $J = 19.5$  Hz); IR (neat, cm<sup>-1</sup>): 2143, 1404, 1187.

**(S)-2-phenylethyl-2-d sulfurazidate ((S)-1a<sub>D</sub>)** was synthesized following General Procedure A, from

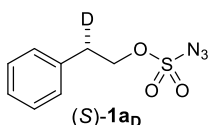

**(S)-2-phenylethyl-2-d-1-ol** (123 mg, 0.99 mmol)<sup>12</sup> and purified by flash silica gel chromatography (eluent: 40: 1 hexanes/EtOAc), TLC  $R_f = 0.65$  (20:1

Hexanes/EtOAc) to afford 190 mg of desired product as a colorless oil (84% yield).

### 4.3.2. Procedure for KIE Studies and Characterization

An oven-dried Schlenk tube that was previously charged with catalyst [Co(**P5**)] or [Co(**P14**)] (0.002 mmol) and 4Å molecular sieves (20 mg), was evacuated and backfilled with nitrogen gas. The Teflon screw cap was replaced with a rubber septum and approximately 0.5 mL of benzene was added, then azide **1a** (0.1 mmol), followed by the remaining benzene (total 1.0 mL). The Schlenk tube was then purged with nitrogen for 2 minutes and the rubber septum was replaced with a Teflon screw cap. The reaction mixture was then stirred for 24 hours at room temperature. After completion of the reaction, the solvent was removed and the reaction mixture was purified by flash column chromatography on silica gel (eluent: 4:1 Hexanes/EtOAc), TLC  $R_f = 0.35$  (4:1 Hexanes/EtOAc) to afford to give the desired product **2a** as white solid. Please see **pages S330–S333** for detail on how to use integration of  $^1\text{H-NMR}$  to determine KIE values. **Note:** ee values of **2a** were determined by chiral HPLC analysis, which offered no separation of (*R*)-**2a<sub>H</sub>** from (*R*)-**2a<sub>D</sub>** and (*S*)-**2a<sub>H</sub>** from (*S*)-**2a<sub>D</sub>**. Single crystal sample was obtained for the product **2a** (98% ee). [*S*] absolute configuration of the product was determined by X-ray crystallography (**pages S166–S168**). HPLC (Chiral AD-H (10% isopropanol - 90% hexanes, 1.0 mL/min) trace indicated that the retention time for *R*-enantiomer is  $t_{\text{major}} = 17.33$  min., the *S*-enantiomer is  $t_{\text{minor}} = 19.59$  min; see **pages S164–S165** and **pages S332–333** for the detailed spectrum and the distribution of enantiomers for the product **2a** for each reaction.

**4-Phenyl-1,2,3-oxathiazolidine 2,2-dioxide-4-d (2a<sub>H</sub>)** was synthesized according to General Procedure

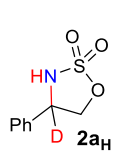

B, starting with [Co(Por)] (0.002 mmol) and **1a<sub>D</sub>** (0.1 mmol), and purified by flash column chromatography on silica gel (eluent: 4:1 Hexanes/EtOAc), TLC  $R_f = 0.35$  (4:1 Hexanes/EtOAc) to afford **4-phenyl-1,2,3-oxathiazolidine 2,2-dioxide-4-d (2a<sub>H</sub>)** together

with **4-phenyl-1,2,3-oxathiazolidine 2,2-dioxide-3-d (2a<sub>D</sub>)** as white solid.  $^1\text{H NMR}$  (600 MHz,  $\text{CDCl}_3$ )  $\delta$  ppm 7.46-7.37 (m, 5H), 4.89 (br.s, 1H), 4.83 (d,  $J = 8.7$  Hz, 1H), 4.44 (d,  $J = 8.7$  Hz, 1H);  $^{13}\text{C NMR}$  (150 MHz,  $\text{CDCl}_3$ ):  $\delta$  ppm 135.4, 129.7, 129.5, 126.8, 75.1, 59.4 (t,  $J = 22.5$  Hz); HRMS (DART) ( $[\text{M}+\text{H}]^+$ ) Calcd. for  $\text{C}_8\text{H}_9\text{DNO}_3\text{S}^+$   $[\text{M}+\text{H}]^+$ : 201.0439, obsd: 201.0431; IR (neat,  $\text{cm}^{-1}$ ): 3241, 1393, 1165, 734.

### 4.3.3. Table S1. Asymmetric Induction Mode Studies

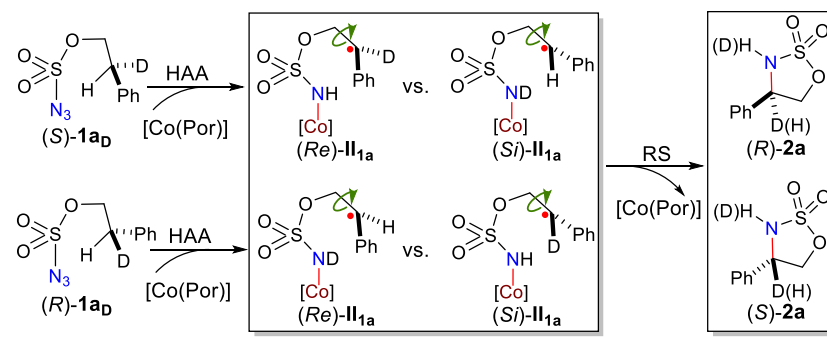

| entry          | azide               | catalyst  | KIE <sup>c</sup> | Re:Si of IIa <sup>d</sup> | ee% <sup>cal,e</sup> | ee% <sup>exp,f</sup> | Yield% |
|----------------|---------------------|-----------|------------------|---------------------------|----------------------|----------------------|--------|
| 1 <sup>a</sup> | (S)-1a <sub>D</sub> | [Co(P5)]  | 11.3             | 92:08                     | 84 (R)               | 36 (R)               | 97     |
| 1 <sup>a</sup> | (R)-1a <sub>D</sub> | [Co(P5)]  | 11.4             | 08:92                     | 84 (S)               | 36 (S)               | 88     |
| 3 <sup>b</sup> | (S)-1a <sub>D</sub> | [Co(P14)] | 0.2              | 16:84                     | 68 (S)               | 92 (S)               | 93     |
| 4 <sup>b</sup> | (R)-1a <sub>D</sub> | [Co(P14)] | 44.0             | 02:98                     | 96 (S)               | 99 (S)               | 91     |

**Comments**

High KIE allowed for highly enantioenriched radical intermediate formation through HAA

significant Re $\leftrightarrow$ Si face rotation occurred during cyclization

Optimized bridged catalyst is highly enantioselective during HAA

Optimized bridged catalyst can further enhance the asymmetric induction during RS



[Co(P5)]  
(P5 = 2,6-DiMeO-IbuPhyrin)



[Co(P14)]  
(P14 = 2,6-DiMeO-Hu(C<sub>6</sub>)Phyrin)

<sup>a</sup> Carried out in benzene at 40 °C for 24 h using 2 mol % [Co(Por)] on 0.10 mmol scale under N<sub>2</sub> in the presence of 4 Å MS; [azide **1a<sub>D</sub>**] = 0.1 M; isolated yield. <sup>b</sup> Run at RT for 24 h. <sup>c</sup> Ratio of H:D determined by <sup>1</sup>H NMR spectroscopy. <sup>d</sup> Calculated based on the ratio of H:D. <sup>e</sup> ee of **2a** calculated on the basis of stereoretentive RS. <sup>f</sup> ee of **2a** determined by chiral HPLC analysis, which offered no separation of (R)-**2a<sub>H</sub>** from (R)-**2a<sub>D</sub>** and (S)-**2a<sub>H</sub>** from (S)-**2a<sub>D</sub>**.

## 4.4 Kinetics Studies

### 4.4.1 Procedure for Kinetics Studies

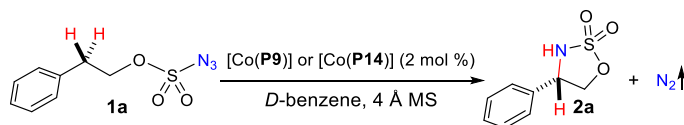

An oven-dried J-Young tube that was previously charged with catalyst [Co(P9)] or [Co(P14)] (0.001 mmol) and 4Å molecular sieves (10 mg), was evacuated and backfilled with argon gas. The Teflon screw cap was replaced with a rubber septum and azide **1a** (0.05 mmol) in 0.5 mL of degassed *D*-benzene was added via injection. The J-Young tube was then purged with argon for 2 minutes and the rubber septum was replaced with a Teflon screw cap. The J-Young tube was then put into NMR instrument. The reaction was monitored via in-situ  $^1H$  NMR (without stirring) for 8 hours. The  $^1H$  NMR integration ratios between the starting materials **1a** and amination product **2a** were used to determine the yields and to calculate the ratios of  $[SM]_t/[SM]_0$ . The reaction rate constants ( $k_{obs}$  values) were determined through calculating the slopes of the least square lines for the plots of  $-\ln([SM]_t/[SM]_0)$  vs. time.

### 4.4.2 Figure S6. Rate Plots of C–H Amination with [Co(P9)] and [Co(P14)]

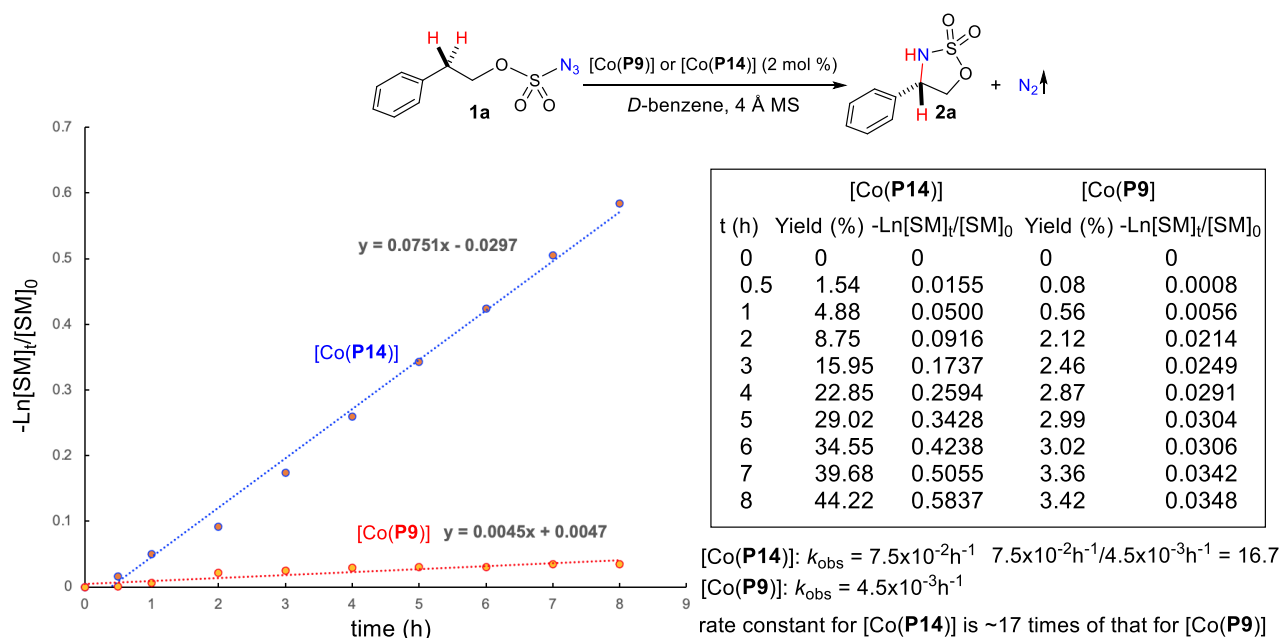

According to these kinetics studies, the rate constant  $k_{obs}$  for the reaction catalyzed by [Co(P14)] is roughly 17 times of that for the reaction catalyzed by [Co(P9)].

## 5. Synthesis of Chiral Amines

**Note:** for Boc-protected product, a mixture of rotamer exists for most of cases, therefore the compound peaks in  $^1\text{H-NMR}$  are typically broad.

### 5.1. Ring-Opening by Carbon Nucleophiles

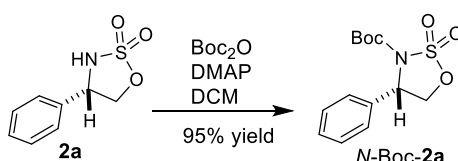

*tert*-Butyl (*S*)-4-phenyl-1,2,3-oxathiazolidine-3-carboxylate 2,2-dioxide (*N*-Boc-**2a**) was prepared according to the following procedure: at 0 °C,  $\text{Boc}_2\text{O}$  (49 mg, 1.5 equiv) and DMAP (2 mg) were added to a solution of **2a** (30 mg, 0.15 mmol) in anhydrous DCM (2 mL). The reaction mixture was stirred for 30 min then the solvent was removed. The residue was purified by flash silica gel chromatography (eluent: Hexanes/EtOAc 8:1) to afford product *N*-Boc-**2a** as white solid (95% yield). m.p. 126-127 °C.  $[\alpha]_{\text{D}}^{20} = +29.0^\circ$  ( $c = 0.4$ ,  $\text{CHCl}_3$ );  $^1\text{H NMR}$  (600 MHz,  $\text{CDCl}_3$ )  $\delta$  ppm 7.46-7.35 (m, 5H), 5.28 (dd,  $J = 6.7, 4.2$  Hz, 1H), 4.87 (dd,  $J = 9.3, 6.7$  Hz, 1H), 4.41 (dd,  $J = 9.3, 4.2$  Hz, 1H), 1.43 (s, 9H);  $^{13}\text{C NMR}$  (150 MHz,  $\text{CDCl}_3$ )  $\delta$  ppm 148.4, 137.1, 129.4, 129.3, 126.3, 85.7, 71.9, 60.9, 28.0; IR (neat,  $\text{cm}^{-1}$ ): 1684; HRMS (ESI)  $m/z$  calcd for  $\text{C}_{13}\text{H}_{17}\text{NNaO}_5\text{S}^+$   $[\text{M}+\text{Na}]^+$ : 322.0725, obsd: 322.0726.

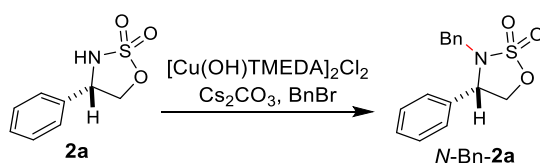

(*S*)-3-Benzyl-4-phenyl-1,2,3-oxathiazolidine 2,2-dioxide (*N*-Bn-**2a**) was prepared according to the following procedure: in a flame-dried flask, sulfamidate **2a** (0.45 mmol),  $[\text{Cu}(\text{OH})\text{TMEDA}]_2\text{Cl}_2$  (5 mol %) (10.5 mg, 0.02 mmol) and  $\text{Cs}_2\text{CO}_3$  (294 mg, 0.9 mmol) were charged, and the flask was evacuated and back-filled with argon three times. The solids were dissolved in anhydrous  $\text{CH}_3\text{CN}$  (7 mL) at room temperature. To this suspension, benzyl bromide (160  $\mu\text{L}$ , 1.36 mmol) was added slowly via syringe, and stirred for 6 h at room temperature. Then, the reaction mixture was filtered through a

celite pad, solids were washed with EtOAc (2 x 20 mL) and the organic layers were combined, dried, and concentrated. The residue was purified by flash silica gel chromatography (eluent: 8:1 Hexanes/EtOAc) to afford product *N*-Bn-**2a** as colorless oil (80% yield), TLC  $R_f = 0.33$  (8:1 Hexanes/EtOAc). **Known compound.**<sup>13</sup>  $[\alpha]_{D}^{20} = -92.0^\circ$  ( $c = 0.9$ ,  $\text{CHCl}_3$ );  $^1\text{H NMR}$  (600 MHz,  $\text{CDCl}_3$ )  $\delta$  ppm 7.41-7.37 (m, 3H), 7.36-7.32 (m, 2H), 7.28-7.24 (m, 3H), 7.22-7.17 (m, 2H), 4.68 (dd,  $J = 8.6, 7.0$  Hz, 1H), 4.61-4.56 (m, 1H), 4.36 (t,  $J = 8.5$  Hz, 1H), 4.28, 4.09 (AB q,  $J = 14.6$  Hz, each 1H);  $^{13}\text{C NMR}$  (150 MHz,  $\text{CDCl}_3$ )  $\delta$  ppm 134.8, 133.8, 129.7, 129.4, 128.6, 128.4, 127.9, 72.7, 63.2, 49.4; IR (neat,  $\text{cm}^{-1}$ ): 1456, 1342, 1182, 756, 696; HRMS (DART)  $m/z$  calcd for  $\text{C}_{15}\text{H}_{16}\text{NO}_3\text{S}^+$   $[\text{M}+\text{H}]^+$ : 290.0845, obsd: 290.0842.

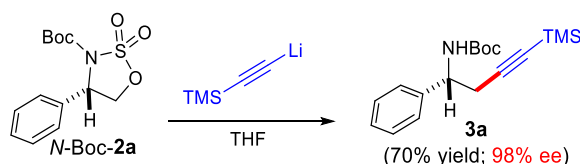

**tert-Butyl (R)-(1-phenyl-4-(trimethylsilyl)but-3-yn-1-yl)carbamate (3a)** was prepared according to the following procedure: an oven-dried Schlenk tube was evacuated and backfilled with nitrogen gas. Under positive pressure of nitrogen, the Teflon screw cap was replaced with a rubber septum and the solution of ethynyltrimethylsilane (0.16 mmol) in THF (2 mL) was added. Then the reaction solution was cooled to  $-78^\circ\text{C}$ , followed by the addition of *n*-BuLi (64  $\mu\text{L}$ , 0.16 mmol, 2.5 M in hexanes). The reaction was stirred for 15 min, taken out of the ice-bath for 10 min, and then cooled back to  $-78^\circ\text{C}$ . *N*-Boc-**2a** (0.1 mmol) in THF (2 mL) was added to this solution. The Schlenk tube was then purged with nitrogen for 2 minutes and the rubber septum was replaced with a Teflon screw cap. The reaction mixture was stirred for 30 mins before being allowed to warm to  $0^\circ\text{C}$  over 1 h. The reaction was quenched by the addition of 1N citric acid (5 mL). Then the reaction mixture was stirred for 30 min. The aqueous layer was extracted with DCM (3 x 20 mL) and the organic layers were combined, dried, and concentrated. The residue was purified by flash silica gel chromatography (eluent: 10:1 Hexanes/EtOAc) to afford product **3a** as colorless oil (70% yield), TLC  $R_f = 0.43$  (8:1 Hexanes/EtOAc).  $[\alpha]_{D}^{20} = +21.2^\circ$  ( $c = 0.9$ ,  $\text{CHCl}_3$ );  $^1\text{H NMR}$  (600 MHz,  $\text{CDCl}_3$ )  $\delta$  ppm 7.39-7.25 (m, 5H), 5.14 (s, 1H), 4.85 (s, 1H), 2.79-2.52 (m, 2H), 1.43 (s, 9H), 0.12 (s, 9H);  $^{13}\text{C NMR}$  (150 MHz,  $\text{CDCl}_3$ )  $\delta$  ppm 156.2, 141.4, 128.5, 127.6, 126.5, 102.7, 88.3, 79.8, 53.0, 28.5, 28.2, 0.1; IR (neat,  $\text{cm}^{-1}$ ): 2176, 1702, 1494, 841; HRMS (DART)

$m/z$  calcd for  $C_{18}H_{28}NO_2Si^+$   $[M+H]^+$ : 318.1884, obsd: 318.1884; HPLC analysis: ee = 98%. Chiral IC (5% isopropanol - 95% hexanes, 1.0 mL/min): Major t = 4.78 min., Minor t = 5.08 min.

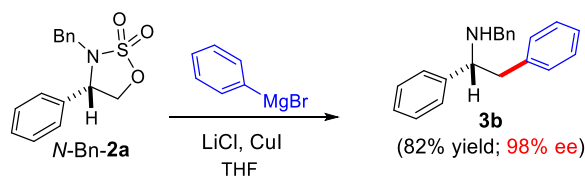

**(R)-N-Benzyl-1,2-diphenylethan-1-amine (3b)** was prepared according to the following procedure: an oven-dried Schlenk tube that was charged with CuI (1.3 mg, 0.007 mmol) and *N*-Bn-2a (20 mg, 0.07 mmol) was evacuated and backfilled with nitrogen three times. Under positive pressure of nitrogen, the Teflon screw cap was replaced with a rubber septum. LiCl (0.15 mg, 0.0035 mmol in stock solution of THF) and anhydrous THF (1.0 mL) were added and the reaction mixture was cooled down to 0 °C. To this solution, 2.5 M solution of PhMgBr in THF (86  $\mu$ L, 0.17 mmol) was added slowly via syringe, and then stirred for 6 h at room temperature. The reaction mixture was quenched with a saturated  $NH_4Cl$  solution (5 mL) and 1N citric acid (5 mL). Then the reaction mixture was stirred for 30 mins and tuned to pH value to 13.0 with 1 M of NaOH solution. The aqueous layer was extracted with DCM (3 x 20 mL) and the organic layers were combined, dried, and concentrated. The residue was purified by flash silica gel chromatography (eluent: Hexanes/EtOAc 4:1) to afford product **3b** as yellow oil (82% yield) (TLC  $R_f$  = 0.30 (Hexanes/EtOAc 4: 1).  $[\alpha]_D^{20} = +20.4^\circ$  ( $c = 0.5$ ,  $CHCl_3$ ); for HCl salt of **3b**:  $^1H$  NMR (500 MHz,  $CD_3OD$ )  $\delta$  ppm 7.48-7.39 (m, 8H), 7.39-7.34 (m, 2H), 7.18-7.12 (m, 3H), 6.99 (dd,  $J = 7.5$ , 1.9 Hz, 2H), 4.51 (dd,  $J = 11.3$ , 4.3 Hz, 1H), 4.17, 3.94 (AB q,  $J = 13.1$  Hz, each 1H), 3.57 (dd,  $J = 13.1$ , 4.3 Hz, 1H), 3.24 (dd,  $J = 13.1$ , 11.3 Hz, 1H);  $^{13}C$  NMR (125 MHz,  $CD_3OD$ )  $\delta$  ppm 135.1, 133.7, 130.9, 129.6, 129.5, 129.4, 129.1, 129.0, 128.9, 128.3, 128.1, 126.7; 64.2, 49.5, 39.1; IR (neat,  $cm^{-1}$ ): 2920, 1494, 1453, 698; HRMS (DART)  $m/z$  calcd for  $C_{21}H_{22}N^+$   $[M+H]^+$ : 288.1747, obsd: 288.1751; HPLC analysis: ee = 98%. Chiral OJH (6% isopropanol - 94% hexanes, 0.8 mL/min): Major t = 14.34 min., Minor t = 19.84 min.

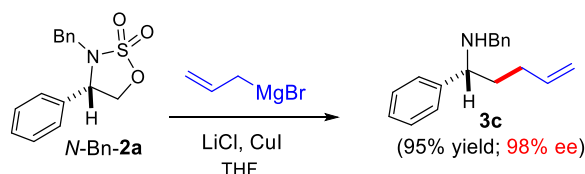

**(R)-N-Benzyl-1-phenylpent-4-en-1-amine (3c)** was prepared according to the following procedure:

an oven-dried Schlenk tube that was charged with CuI (1.3 mg, 0.007 mmol) and *N*-Bn-**2a** (20 mg, 0.07 mmol) was evacuated and backfilled with nitrogen three times. Under positive pressure of nitrogen, the Teflon screw cap was replaced with a rubber septum. LiCl (0.15 mg, 0.0035 mmol in stock solution of THF) and anhydrous THF (1.0 mL) was added and the reaction mixture was cooled down to 0 °C. To this solution, 1M solution of allylMgBr in THF (172 μL, 0.17 mmol) was added slowly via syringe, and then stirred for 6 h at room temperature. The reaction mixture was quenched with a saturated NH<sub>4</sub>Cl solution (5 mL) and 1N citric acid (5 mL). Then the reaction mixture was stirred for 30 mins and tuned to pH value to 13.0 with 1 M of NaOH solution. The aqueous layer was extracted with DCM (3 x 20 mL) and the organic layers were combined, dried, and concentrated. The residue was purified by flash silica gel chromatography (eluent: Hexanes/EtOAc 4:1) to afford product **3c** as yellow oil (95% yield) (TLC R<sub>f</sub> = 0.30 (Hexanes/EtOAc 4: 1). [α]<sub>D</sub><sup>20</sup> = +24.6° (c = 0.7, CHCl<sub>3</sub>); <sup>1</sup>H NMR (500 MHz, CDCl<sub>3</sub>) δ ppm 7.38-7.20 (m, 10H), 5.76 (ddt, *J* = 16.8, 10.1, 6.6 Hz, 1H), 4.99-4.89 (m, 2H), 3.66-3.61 (m, 2H), 3.53 (d, *J* = 13.2 Hz, 1H), 1.99 (ddd, *J* = 23.5, 14.7, 7.9 Hz, 2H), 1.88-1.65 (m, 3H); <sup>13</sup>C NMR (150 MHz, CDCl<sub>3</sub>) δ ppm 144.13, 140.8, 138.5, 128.6, 128.5, 128.3, 127.5, 127.2, 127.0, 114.8, 62.2, 51.7, 37.5, 30.7; IR (neat, cm<sup>-1</sup>): 1265, 904, 724; HRMS (DART) *m/z* calcd for C<sub>18</sub>H<sub>22</sub>N<sup>+</sup> [M+H]<sup>+</sup>: 252.1746, obsd: 252.1746; HPLC analysis: ee = 98%. Chiral IA (3% isopropanol - 97% hexanes, 0.5 mL/min): Major t = 9.44 min., Minor t = 10.80 min.

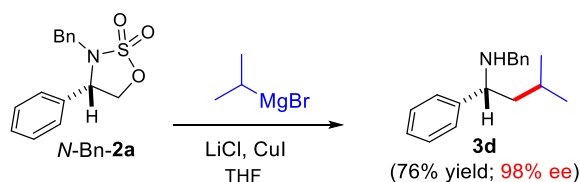

**(R)-N-Benzyl-3-methyl-1-phenylbutan-1-amine (3d)** was prepared according to the following procedure: an oven-dried Schlenk tube that was charged with CuI (2.9 mg, 0.015 mmol) and *N*-Bn-**2a** (44 mg, 0.15 mmol) was evacuated and backfilled with nitrogen three times. Under positive pressure of nitrogen, the Teflon screw cap was replaced with a rubber septum. LiCl (0.15 mg, 0.0035 mmol in stock solution of THF) and anhydrous THF (1.5 mL) were added and the reaction mixture was cooled down to 0 °C. To this solution, 1M solution of *i*PrMgBr in THF (382 μL, 0.38 mmol) was added slowly via syringe, and then reaction mixtures were stirred for 6 h at room temperature. The reaction mixture was quenched with a saturated NH<sub>4</sub>Cl solution (5 mL) and 1N citric acid (5 mL). Then the reaction mixture



was stirred for 30 min and tuned to pH value to 13.0 with 1 M of NaOH solution. The aqueous layer was extracted with DCM (3 x 20 mL) and the organic layers were combined, dried, and concentrated. The residue was purified by flash silica gel chromatography (eluent: 4:1 Hexanes/EtOAc) to afford product **3d** as yellow oil (76% yield), TLC  $R_f = 0.30$  (4:1 Hexanes/EtOAc).  $[\alpha]_D^{20} = +18.9^\circ$  ( $c = 0.5$ ,  $\text{CHCl}_3$ );  $^1\text{H NMR}$  (500 MHz,  $\text{CDCl}_3$ )  $\delta$  ppm 7.40-7.17 (m, 5H), 3.75-3.63 (m, 1H), 3.63, 3.51 (AB q,  $J = 13.1$  Hz, each 1H), 1.61-1.55 (m, 2H), 1.55-1.44 (m, 2H), 0.88 (d,  $J = 6.0$  Hz, 3H), 0.82 (d,  $J = 6.0$  Hz, 3H);  $^{13}\text{C NMR}$  (125 MHz,  $\text{CDCl}_3$ )  $\delta$  ppm 144.8, 140.9, 128.5, 128.4, 128.3, 127.4, 127.0, 126.9, 60.6, 51.7, 47.9, 25.1, 22.9, 22.8; IR (neat,  $\text{cm}^{-1}$ ): 2953, 1493, 1452, 1126; HRMS (DART)  $m/z$  calcd for  $\text{C}_{18}\text{H}_{24}\text{N}^+$   $[\text{M}+\text{H}]^+$ : 254.1903, obsd: 254.1910; HPLC analysis: ee = 98%. Chiral OJH (1% isopropanol - 99% hexanes, 1.1 mL/min): Major t = 17.79 min., Minor t = 10.39 min.

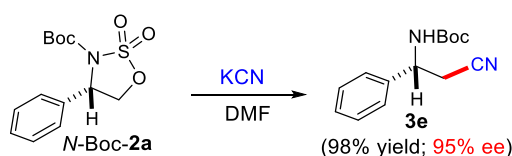

**(S)-tert-Butyl (2-cyano-1-phenylethyl)carbamate (3e)** was prepared according to the following procedure: KCN (10.4 mg, 0.16 mmol) was added to a stirred solution of *N*-Boc-**2a** (0.10 mmol) in DMF (0.8 mL) at rt. After 4 h, the solvent was removed and the resulting residue was stirred overnight between ether (2 mL) and a  $\text{H}_2\text{SO}_4$  solution (1 mL, 2M). A solution of NaOH (4 mL, 1M) was added to tune pH to 10 and the resulting solution was stirred for 1 h. The aqueous layer was extracted with  $\text{Et}_2\text{O}$  (3 x 20 mL) and the organic layers were combined, dried, and concentrated. The residue was purified by flash silica gel chromatography (eluent: 8:1 Hexanes/EtOAc) to afford product **3e** as white solid (98% yield), TLC  $R_f = 0.43$  (4:1 Hexanes/EtOAc). **Known compound.**<sup>14</sup> m.p.110-112 °C.  $[\alpha]_D^{20} = +34.0^\circ$  ( $c = 0.8$ ,  $\text{CHCl}_3$ );  $^1\text{H NMR}$  (400 MHz,  $\text{CDCl}_3$ )  $\delta$  ppm 7.53-7.31 (m, 5H), 5.23-4.98 (m, 2H), 3.09-2.98 (m, 1H), 2.97-2.83 (m, 1H), 1.46 (s, 9H);  $^{13}\text{C NMR}$  (100 MHz,  $\text{CDCl}_3$ )  $\delta$  ppm 154.8, 138.4, 129.2, 128.7, 126.2, 116.9, 80.6, 51.2, 28.2, 25.2; IR (neat,  $\text{cm}^{-1}$ ): 1684; HPLC analysis: ee = 95%. Chiral AD-H (10% isopropanol - 90% hexanes, 0.8 mL/min): Major t = 14.26 min., Minor t = 17.60 min.

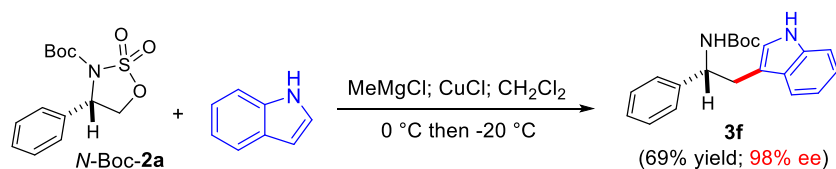

**tert-Butyl (R)-(2-(1H-indol-3-yl)-1-phenylethyl)carbamate (3f)** was prepared according to the following procedure: an oven-dried Schlenk tube that was previously charged with mixture of indole (16 mg, 0.13 mmol) and CuCl (11 mg, 0.11 mmol) in CH<sub>2</sub>Cl<sub>2</sub> (0.3 mL) was cooled down to 0 °C. Then MeMgCl (3.0 M in THF, 36 μL, 0.11 mmol) was added over 10 min at 0 °C. The reaction mixture was stirred at 0 °C for 1 h and cooled to -20 °C. A solution of *N*-Boc-**2a** (25 mg, 0.08 mmol) in CH<sub>2</sub>Cl<sub>2</sub> (0.2 mL) was added into the reaction mixture over 30 min at -20 °C. The reaction mixture was then stirred at -20 °C for 18 h, quenched with 10% aqueous citric acid (1.0 mL) at 0 °C, filtered, extracted with CH<sub>2</sub>Cl<sub>2</sub> (10.0 mL x 2), washed with saturated brine (20.0 mL x 2), dried (Na<sub>2</sub>SO<sub>4</sub>), filtered and concentrated. The residue was purified by flash silica gel chromatography (eluent: 4:1 Hexanes/EtOAc) to afford product **3f** as light pink solid (69% yield), TLC R<sub>f</sub> = 0.20 (4:1 Hexanes/EtOAc). [α]<sub>D</sub><sup>20</sup> = +5.8° (*c* = 1.1, CHCl<sub>3</sub>); <sup>1</sup>H NMR (600 MHz, CDCl<sub>3</sub>) δ ppm 7.93 (s, 1H), 7.40 (d, *J* = 7.9 Hz, 1H), 7.25 (d, *J* = 8.1 Hz, 1H), 7.23-7.19 (m, 2H), 7.16 (m, 3H), 7.10 (t, *J* = 7.5 Hz, 1H), 7.00 (t, *J* = 7.4 Hz, 1H), 6.69 (s, 1H), 4.99 (s, 1H), 4.90 (s, 1H), 3.15 (s, 2H), 1.31 (s, 9H); <sup>13</sup>C NMR (150 MHz, CDCl<sub>3</sub>) δ ppm 155.4, 143.0, 136.2, 128.5, 127.9, 127.2, 126.5, 122.9, 122.1, 119.6, 119.0, 111.7, 111.2, 79.6, 55.0, 33.1, 28.5; IR (neat, cm<sup>-1</sup>): 1733, 1264, 732, 703; HRMS (DART) *m/z* calcd for C<sub>21</sub>H<sub>25</sub>N<sub>2</sub>O<sub>2</sub><sup>+</sup> [M+H]<sup>+</sup>: 337.1911, obsd: 337.1899; HPLC analysis: ee = 98%. Chiral ADH (10% isopropanol - 90% hexanes, 1.0 mL/min): Major *t* = 25.10 min., Minor *t* = 17.41 min.

## 5.2. Ring-Opening by Nitrogen Nucleophiles

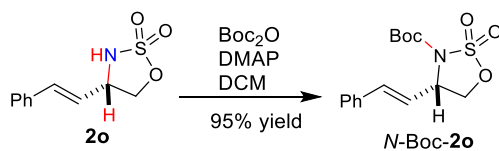

**tert-Butyl (S,E)-4-styryl-1,2,3-oxathiazolidine-3-carboxylate 2,2-dioxide (N-Boc-2o)** was prepared according to the following procedure: at 0 °C, Boc<sub>2</sub>O (32 mg, 1.5 equiv) and DMAP (2 mg) were added to a solution of **2o** (22 mg, 0.15 mmol) in anhydrous DCM (2 mL). The reaction mixture

was stirred for 30 mins and then the solvent was removed. The residue was purified by flash silica gel chromatography (eluent: 4:1 Hexanes/EtOAc) to afford product *N*-Boc-**2o** as white solid (95% yield), TLC  $R_f$  = 0.33 (4:1 Hexanes/EtOAc). m.p. 141-143 °C.  $[\alpha]_D^{20}$  = +12.0° ( $c$  = 1.1, CHCl<sub>3</sub>); <sup>1</sup>H NMR (500 MHz, CDCl<sub>3</sub>) δ ppm 7.43-7.39 (m, 2H), 7.38-7.32 (m, 2H), 7.32-7.28 (m, 1H), 6.73 (d,  $J$  = 15.7 Hz, 1H), 6.24 (dd,  $J$  = 15.7, 8.1 Hz, 1H), 4.99-4.88 (m, 1H), 4.77 (dd,  $J$  = 9.2, 6.3 Hz, 1H), 4.38 (dd,  $J$  = 9.3, 3.5 Hz, 1H), 1.53 (s, 9H); <sup>13</sup>C NMR (150 MHz, CDCl<sub>3</sub>) δ ppm 148.4, 135.8, 135.2, 128.9, 128.8, 127.0, 122.8, 85.7, 70.4, 59.6, 28.1; IR (neat, cm<sup>-1</sup>): 1714, 1369, 1244, 752; HRMS (DART)  $m/z$  calcd for C<sub>15</sub>H<sub>23</sub>N<sub>2</sub>O<sub>5</sub>S<sup>+</sup> [M+NH<sub>4</sub>]<sup>+</sup> 343.1322, obsd: 343.1311.

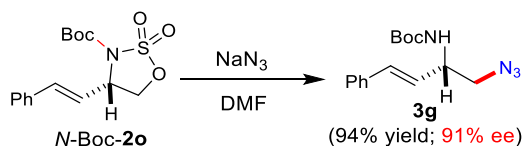

*tert*-Butyl (*S,E*)-(1-azido-4-phenylbut-3-en-2-yl)carbamate (**3g**) was synthesized according to the following procedure: NaN<sub>3</sub> (15.6 mg, 0.24 mmol) was added to a stirred solution of *N*-Boc-**2o** (0.08 mmol) in DMF (0.8 mL) at r.t. After 24 h, the reaction mixture was stirred for 30 min between ether (2 mL) and 1N citric acid (5 mL). The aqueous layer was extracted with Et<sub>2</sub>O (3 x 20 mL) and the organic layers were combined, dried, and concentrated. The residue was purified by flash silica gel chromatography (eluent: 10:1 Hexanes/EtOAc) to afford product **3g** as white solid (94% yield), TLC  $R_f$  = 0.43 (8:1 Hexanes/EtOAc). m.p. 80-82 °C.  $[\alpha]_D^{20}$  = +13.8° ( $c$  = 0.9, CHCl<sub>3</sub>); <sup>1</sup>H NMR (600 MHz, CDCl<sub>3</sub>) δ ppm 7.37 (d,  $J$  = 7.3 Hz, 2H), 7.32 (t,  $J$  = 7.6 Hz, 2H), 7.28-7.23 (m, 1H), 6.61 (d,  $J$  = 15.9 Hz, 1H), 6.13 (dd,  $J$  = 16.0, 6.2 Hz, 1H), 4.83 (br.s, 1H), 4.50 (br.s, 1H), 3.63-3.44 (m, 2H), 1.47 (s, 9H); <sup>13</sup>C NMR (150 MHz, CDCl<sub>3</sub>) δ ppm 156.1, 136.3, 132.5, 128.8, 128.2, 126.7, 126.6, 80.2, 55.2, 52.4, 28.5; IR (neat, cm<sup>-1</sup>): 2103, 1707, 1496, 1169, 769; HRMS (DART)  $m/z$  calcd for C<sub>15</sub>H<sub>21</sub>N<sub>4</sub>O<sub>2</sub><sup>+</sup> [M+H]<sup>+</sup>: 289.1659, obsd: 289.1659; HPLC analysis: ee = 91%. Chiral ADH (5% isopropanol - 95% hexanes, 1.0 mL/min): Major t = 12.65 min., Minor t = 14.99 min.

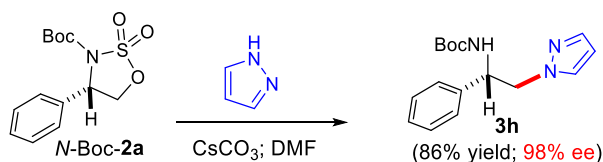

***tert*-Butyl (*S*)-(1-phenyl-2-(1H-pyrazol-1-yl)ethyl)carbamate (**3h**)** was prepared according to the following procedure. Cesium carbonate (65 mg, 0.2 mmol) was added to a stirred solution of *N*-Boc-**2a** (0.1 mmol) and pyrazole (13.6 mg, 0.2 mmol) in DMF (0.5 mL) at rt. After 24 h, the reaction was quenched by addition of 1N citric acid (5 mL) and the mixture was stirred for 30 min. The aqueous layer was then extracted with DCM (5 x 20 mL) and the organic layers were combined, dried, and concentrated. The residue was purified by flash silica gel chromatography (eluent: Hexanes/EtOAc 2:1) to afford product **3h** as white solid (86% yield) (TLC  $R_f$  = 0.40 (Hexanes/EtOAc 2: 1). m.p. 146-148 °C.  $[\alpha]_D^{20}$  = +53.4° ( $c$  = 0.7, CHCl<sub>3</sub>); <sup>1</sup>H NMR (500 MHz, CDCl<sub>3</sub>)  $\delta$  ppm 7.53-7.55 (m, 1H), 7.30-7.21 (m, 3H), 7.06 (d,  $J$  = 6.9 Hz, 2H), 6.99 (s, 1H), 6.13 (s, 1H), 6.02 (br.s, 1H), 5.07 (br.s, 1H), 4.58-4.49 (m, 1H), 4.39-4.29 (m, 1H), 1.40 (s, 9H); <sup>13</sup>C NMR (150 MHz, CDCl<sub>3</sub>)  $\delta$  ppm 156.3, 140.1, 139.6, 130.6, 128.7, 127.8, 126.3, 105.6, 79.8, 57.0, 55.5, 28.5; IR (neat, cm<sup>-1</sup>): 3367, 1686, 1525, 1250, 1169; HRMS (DART)  $m/z$  calcd for C<sub>16</sub>H<sub>22</sub>N<sub>3</sub>O<sub>2</sub><sup>+</sup> [M+H]<sup>+</sup>: 288.1707, obsd: 288.1696; HPLC analysis: ee = 98%. Chiral IC (10% isopropanol - 90% hexanes, 1.0 mL/min): Major t = 11.84 min., Minor t = 17.37 min.

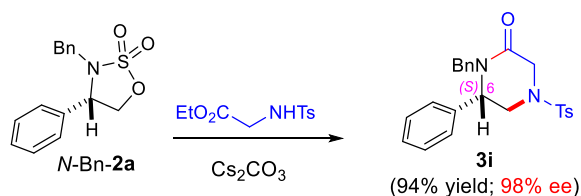

**(*S*)-1-Benzyl-6-phenyl-4-tosylpiperazin-2-one (**3i**)** was prepared according to the following procedure: Ethyl 2-(4-methylphenylsulfonamido)acetate (17 mg, 0.07 mmol, commercially available, cas: 5465-67-8) and Cs<sub>2</sub>CO<sub>3</sub> (23 mg, 0.07 mmol) were added to a stirred solution of *N*-Bn-**2a** (20 mg, 0.07 mmol) in DMF (0.4 mL) at room temperature. After 16 h, the reaction was quenched by addition of 1N citric acid (5 mL) and the mixture was stirred for 6 h. After tuning the pH to 12 by adding NaOH (1M), the aqueous layer was then extracted with DCM (5 x 20 mL) and the organic layers were combined, dried, and concentrated. The residue was dissolved into toluene (1 mL) and the reaction mixture was heated to 120 °C for overnight to induce the lactamization. Then the solvent was removed and the residue was

purified by flash silica gel chromatography (eluent: Hexanes/EtOAc 4:1) to afford product **3i** as yellow solid (94% yield) (TLC  $R_f$  = 0.35 (Hexanes/EtOAc 4: 1). m.p. 130-132 °C.  $[\alpha]_D^{20}$  = -45.0° ( $c$  = 1.7, CHCl<sub>3</sub>); <sup>1</sup>H NMR (600 MHz, CDCl<sub>3</sub>) δ ppm 7.55 (d,  $J$  = 8.2 Hz, 2H), 7.43-7.36 (m, 3H), 7.33-7.24 (m, 5H), 7.17 (dd,  $J$  = 2.9, 6.5 Hz, 2H), 7.09-7.04 (m, 2H), 5.48, 3.41 (AB q,  $J$  = 14.7 Hz, 1H), 4.44 (t,  $J$  = 4.4 Hz, 1H), 4.00 (d,  $J$  = 16.4 Hz, 1H), 3.80 (d,  $J$  = 16.4 Hz, 1H), 3.38 (dd,  $J$  = 5.3, 12.3 Hz, 1H), 3.27 (dd,  $J$  = 4.4, 12.0 Hz, 1H), 2.44 (s, 3H); <sup>13</sup>C NMR (150 MHz, CDCl<sub>3</sub>) δ ppm 165.1, 144.7, 137.4, 136.2, 132.4, 130.3, 129.4, 129.1, 129.1, 128.8, 128.2, 128.1, 127.6, 59.1, 50.4, 49.5, 47.4, 21.9; IR (neat, cm<sup>-1</sup>): 2921, 1656, 1166, 1264; HRMS (DART)  $m/z$  calcd for C<sub>24</sub>H<sub>25</sub>N<sub>2</sub>O<sub>3</sub>S<sup>+</sup> [M+H]<sup>+</sup>: 421.1580, obsd: 421.1588; HPLC analysis: ee = 98%. Chiral ADH (30% isopropanol - 70% hexanes, 1.0 mL/min): Major t = 14.27 min., Minor t = 19.36 min. 6-[S] absolute configuration of the product was determined by X-ray crystallography.

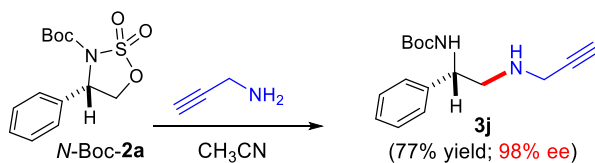

**tert-Butyl (S)-(1-phenyl-2-(prop-2-yn-1-ylamino)ethyl)carbamate (3j)** was prepared according to the following procedure: propargylamine (24 mg, 0.44 mmol) was added to a stirred solution of *N*-Boc-**2a** (0.15 mmol) in CH<sub>3</sub>CN (1.0 mL) at 40 °C. After 24 h, the reaction was quenched by addition of 1N citric acid (5 mL) and the mixture was stirred for 8 h. After tuning the pH to 12 by adding NaOH (1M), the aqueous layer was then extracted with DCM (5 x 20 mL) and the organic layers were combined, dried, and concentrated. The residue was purified by flash silica gel chromatography (eluent: 2:1 Hexanes/EtOAc) to afford product **3j** as yellow solid (77% yield), TLC  $R_f$  = 0.40 (1:1 Hexanes/EtOAc). m.p. 146-148 °C.  $[\alpha]_D^{20}$  = +22.6° ( $c$  = 1.7, CHCl<sub>3</sub>); <sup>1</sup>H NMR (600 MHz, CDCl<sub>3</sub>) δ ppm 7.46-7.14 (m, 5H), 5.45 (s, 1H), 4.80 (s, 1H), 3.38 (qd,  $J$  = 17.1, 2.3 Hz, 2H), 3.04 (br. s, 1H), 2.95 (dd,  $J$  = 11.9, 4.9 Hz, 1H), 2.19 (t,  $J$  = 2.3 Hz, 1H), 1.42 (s, 9H), 1.19 (br. s, 1H); <sup>13</sup>C NMR (150 MHz, CDCl<sub>3</sub>) δ ppm 155.6, 141.2, 128.8, 127.4, 126.3, 81.9, 79.6, 71.7, 54.0, 53.7, 38.2, 28.5; IR (neat, cm<sup>-1</sup>): 3303, 1703, 1493, 1264, 701; HRMS (DART)  $m/z$  calcd for C<sub>16</sub>H<sub>23</sub>N<sub>2</sub>O<sub>2</sub><sup>+</sup> [M+H]<sup>+</sup>: 275.1754, obsd: 275.1763; HPLC analysis: ee = 98%. Chiral ADH (5% isopropanol - 95% hexanes, 1.0 mL/min): Major t = 18.18 min., Minor t = 24.04 min.

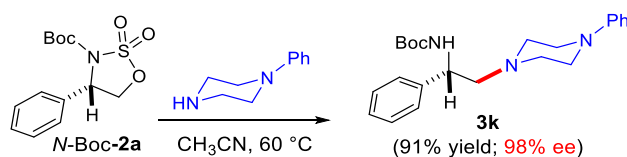

**tert-Butyl (S)-2-(1-phenyl-2-(4-phenylpiperazin-1-yl)ethyl)carbamate (3k)** was prepared according to the following procedure. 1-Phenylpiperazine (49 mg, 0.3 mmol) was added to a stirred solution of *N*-Boc-**2a** (0.1 mmol) in CH<sub>3</sub>CN (1.0 mL) at 60 °C. After 24 h, the reaction was quenched by addition of 1 N citric acid (5 mL) and the mixture was stirred for 8 h. After tuning the pH to 12 by adding NaOH (1 M), the aqueous layer was then extracted with DCM (5 x 20 mL) and the organic layers were combined, dried, and concentrated. The residue was purified by flash silica gel chromatography (eluent: 3:1 Hexanes/EtOAc) to afford product **3k** as white solid (91% yield), TLC  $R_f = 0.40$  (2:1 Hexanes/EtOAc). m.p. 77-79 °C.  $[\alpha]_D^{20} = +11.5^\circ$  ( $c = 2.2$ , CHCl<sub>3</sub>); <sup>1</sup>H NMR (600 MHz, CDCl<sub>3</sub>)  $\delta$  ppm 7.38-7.29 (m, 4H), 7.28-7.22 (m, 4H), 6.92 (d,  $J = 8.0$  Hz, 1H), 6.89-6.80 (m, 1H), 5.48 (br.s, 1H), 4.71 (br.s, 1H), 3.28-3.10 (m, 4H), 2.81-2.66 (m, 2H), 2.64-2.47 (m, 4H), 1.40 (s, 9H); <sup>13</sup>C NMR (150 MHz, CDCl<sub>3</sub>)  $\delta$  ppm 155.9, 151.4, 129.2, 128.6, 127.3, 126.3, 119.9, 116.2, 79.6, 64.0, 53.2, 49.3, 28.5; IR (neat, cm<sup>-1</sup>): 3263, 1685, 1215, 773; HRMS (DART)  $m/z$  calcd for C<sub>23</sub>H<sub>32</sub>N<sub>3</sub>O<sub>2</sub><sup>+</sup> [M+H]<sup>+</sup>: 382.2489, obsd: 382.2500; HPLC analysis: ee = 98%. Chiral IB (2.5% isopropanol - 97.5% hexanes, 1.0 mL/min): Major t = 16.52 min., Minor t = 14.10 min.

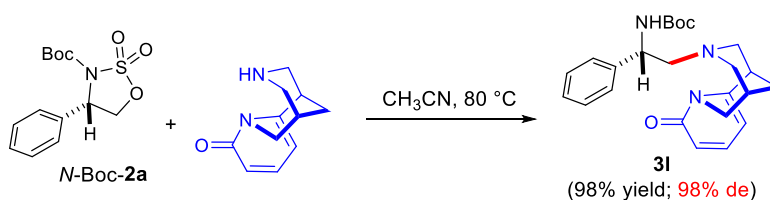

**tert-Butyl((S)-2-((1R,5S)-8-oxo-1,5,6,8-tetrahydro-2H-1,5-methanopyrido[1,2-a][1,5]diazocin-3(4H)-yl)-1-phenylethyl)carbamate (3l)** was prepared according to the following procedure: an oven-dried Schlenk tube that was previously charged with Cytisine (25 mg, 0.13 mmol) and *N*-Boc-**2a** (0.067 mmol) was evacuated and backfilled with nitrogen. The Teflon screw cap was replaced with a rubber septum and 1.0 ml of CH<sub>3</sub>CN was added. The Schlenk tube was then purged with nitrogen for 2 min and the rubber septum was replaced with a Teflon screw cap. The reaction mixture was stirred at 80 °C

for 24 h. Then the reaction was quenched by addition of 1 N citric acid (5 mL) and the mixture was stirred for 30 mins. After tuning the pH to 12 by adding NaOH (1 M), the aqueous layer was then extracted with DCM (5 x 20 mL) and the organic layers were combined, dried, and concentrated. The residue was purified by flash silica gel chromatography (eluent: EtOAc only) to afford product **3l** as off white oil (98% yield) (TLC  $R_f$  = 0.30 (EtOAc only)).  $[\alpha]_{D}^{20}$  = -86.0° ( $c$  = 1.3, CHCl<sub>3</sub>); <sup>1</sup>H NMR (600 MHz, CDCl<sub>3</sub>) δ ppm 7.29-7.24 (m, 3H), 7.18 (t,  $J$  = 7.3 Hz, 1H), 7.11 (d,  $J$  = 7.5 Hz, 2H), 6.45 (t,  $J$  = 13.8 Hz, 1H), 5.94 (t,  $J$  = 10.6 Hz, 1H), 4.89 (br. s, 1H), 4.47 (br. s, 1H), 4.02 (d,  $J$  = 15.3 Hz, 1H), 3.82 (dd,  $J$  = 15.3, 6.5 Hz, 1H), 2.95-2.93 (m, 2H), 2.67 (d,  $J$  = 10.9 Hz, 1H), 2.51-2.32 (m, 5H), 1.87 (d,  $J$  = 12.8 Hz, 1H), 1.75 (d,  $J$  = 12.8 Hz, 1H), 1.32 (s, 9H); <sup>13</sup>C NMR (150 MHz, CDCl<sub>3</sub>) δ ppm 163.6, 155.4, 151.0, 141.7, 138.8, 128.6, 127.2, 126.0, 117.0, 104.6, 79.3, 62.9, 61.1, 59.9, 52.4, 50.0, 35.5, 28.4, 28.2, 25.9; IR (neat, cm<sup>-1</sup>): 1699, 1648, 1546, 1363, 1165, 734; HRMS (DART)  $m/z$  calcd for C<sub>24</sub>H<sub>32</sub>N<sub>3</sub>O<sub>3</sub><sup>+</sup> [M+H]<sup>+</sup>: 410.2438, obsd: 410.2440; <sup>1</sup>H NMR (600 MHz, C<sub>6</sub>D<sub>6</sub>) analysis: de = 98%.

### 5.3. Ring-Opening by Oxygen, Fluorine, Phosphine and Sulfur Nucleophiles

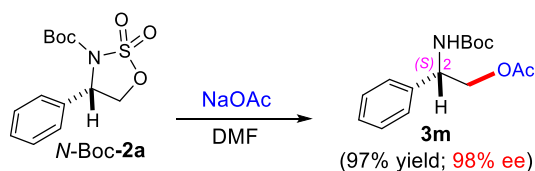

(*S*)-*tert*-Butyl (2-acetyloxy-1-phenylethyl)carbamate (**3m**) was prepared according to the following procedure: NaOAc (14.7 mg, 0.16 mmol) was added to a stirred solution of *N*-Boc-**2a** (0.10 mmol) in DMF (0.8 mL) at rt. After 4 h, the solvent was removed and the resulting residue was stirred overnight between ether (2 mL) and H<sub>2</sub>SO<sub>4</sub> solution (1 mL, 2M). A solution of NaOH (4 mL, 1M) was added to tune pH to 10 and the resulting solution was stirred for 1 h. The aqueous layer was extracted with Et<sub>2</sub>O (3 x 20 mL) and the organic layers were combined, dried, and concentrated. The residue was purified by flash silica gel chromatography (eluent: Hexanes/EtOAc 8:1) to afford product **3m** as white solid (97% yield) (TLC  $R_f$  = 0.30 (Hexanes/EtOAc 4: 1)). **Known compound.**<sup>15</sup> m.p. 114-116 °C.  $[\alpha]_{D}^{20}$  = +30.0° ( $c$  = 0.8, CHCl<sub>3</sub>); <sup>1</sup>H NMR (600 MHz, CDCl<sub>3</sub>) δ 7.39-7.32 (m, 2H), 7.32-7.27 (m, 3H), 5.10 (br. s, 1H), 4.98 (br. s, 1H), 4.37-4.23 (m, 2H), 2.04 (s, 3H), 1.43 (s, 9H); <sup>13</sup>C NMR (150 MHz, CDCl<sub>3</sub>) δ ppm 171.1, 155.3, 139.0, 128.8, 128.0, 126.7, 80.0, 66.8, 53.9, 28.5, 21.0; IR (neat, cm<sup>-1</sup>): 1715, 1684;

HPLC analysis: ee = 98%. Chiral AD-H (7% isopropanol - 93% hexanes, 1.0 mL/min): Major t = 14.93 min., Minor t = 12.57 min. 2-[S] absolute configuration of the product was determined by X-ray crystallography.

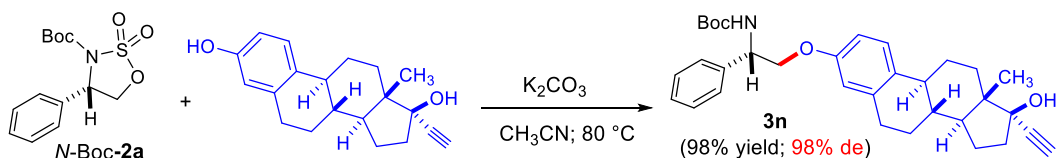

***tert*-Butyl((*S*)-2-(((8*R*,9*S*,13*S*,14*S*,17*R*)-17-ethynyl-17-hydroxy-13-methyl-7,8,9,11,12,13,14,15,16,17-decahydro-6*H*-cyclopenta[*a*]phenanthren-3-yl)oxy)-1-phenylethyl)carbamate (3n)** was prepared according to the following procedure: 17 $\alpha$ -Ethynelestradiol (89 mg, 0.3 mmol) and K<sub>2</sub>CO<sub>3</sub> (17 mg, 0.1 mmol) were added to a stirred solution of *N*-Boc-2a (0.1 mmol) in CH<sub>3</sub>CN (1.0 mL) at 80 °C. After 24 h, the reaction was quenched by addition of 1 N citric acid (5 mL) and the mixture was stirred for 30 min. After tuning the pH to 12 by adding NaOH (1 M), the aqueous layer was then extracted with DCM (5 x 20 mL) and the organic layers were combined, dried, and concentrated. The residue was purified by flash silica gel chromatography (eluent: Hexanes/EtOAc 3:1) to afford product **3n** as colorless oil (98% yield) (TLC R<sub>f</sub> = 0.30 (Hexanes/EtOAc 2:1). [ $\alpha$ ]<sub>D</sub><sup>20</sup> = +5.0° (*c* = 2.4, CHCl<sub>3</sub>); <sup>1</sup>H NMR (600 MHz, CDCl<sub>3</sub>)  $\delta$  ppm 7.41-7.31 (m, 4H), 7.27 (d, *J* = 7.2 Hz, 1H), 7.18 (d, *J* = 8.6 Hz, 1H), 6.68 (dd, *J* = 8.6, 2.6 Hz, 1H), 6.60 (d, *J* = 2.5 Hz, 1H), 5.34 (br.s, 1H), 5.04 (br.s, 1H), 4.18 (br.s, 1H), 4.11 (br.s, 1H), 2.91-2.73 (m, 2H), 2.59 (s, 1H), 2.38-2.29 (m, 2H), 2.26-2.16 (m, 1H), 2.06-2.01 (m, 1H), 2.01-1.96 (m, 1H), 1.95-1.83 (m, 2H), 1.82-1.74 (m, 1H), 1.75-1.65 (m, 2H), 1.63 (br. s, 1H), 1.55-1.28 (m, 12H), 0.87 (s, 3H); <sup>13</sup>C NMR (150 MHz, CDCl<sub>3</sub>)  $\delta$  ppm 156.4, 155.5, 140.1, 138.2, 133.3, 128.6, 127.7, 126.9, 126.5, 114.8, 112.3, 87.7, 80.0, 79.9, 74.2, 70.7, 54.0, 49.6, 47.3, 44.6, 43.7, 39.5, 39.1, 32.9, 29.9, 28.5, 27.3, 26.5, 22.9, 12.8; IR (neat, cm<sup>-1</sup>): 3399, 2159, 1696, 1496, 1165, 734; HRMS (DART) *m/z* calcd for C<sub>33</sub>H<sub>42</sub>NO<sub>4</sub><sup>+</sup> [M+H]<sup>+</sup>: 516.3108, obsd 516.3082; HPLC analysis: de = 98%. Chiral ADH (10% isopropanol - 90% hexanes, 1.0 mL/min): Major t = 51.22 min., Minor t = 33.10 min. (Note the chiral center formed via amination was remote to the chiral centers in 17 $\alpha$ -ethynelestradiol moiety and the ring-opening products from ( $\pm$ )-*N*-Boc-2a and (+)-*N*-Boc-2a are identical in <sup>1</sup>H NMR. The HPLC was the next option for de determination, since two diastereomers generated behave more like enantiomers due to the remoteness between nitrogen-centered chirality and the enantiopure chiral



centers in 17 $\alpha$ -ethynylestradiol moiety. Using 210 nm in the HPLC, the two diastereomers generated from ( $\pm$ )-*N*-Boc-**2a** were integrated to be 50% and 50% on HPLC; the similar concentration of **3n** generated from (+)-*N*-Boc-**2a** was determined to be 98% de).

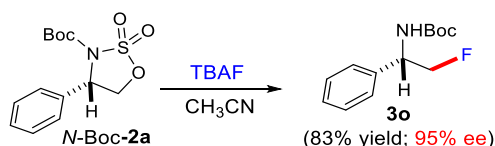

(*S*)-*tert*-Butyl (2-fluoro-1-phenylethyl)carbamate (**3o**) was prepared according to the following procedure: TBAF (41.7 mg, 0.16 mmol) was dissolved in anhydrous CH<sub>3</sub>CN (0.8 mL). *N*-Boc-**2a** (0.1 mmol) was added and the mixture was stirred for 30 mins at rt. Then the solvent was removed and the resulting residue was stirred overnight between ether (2 mL) and H<sub>2</sub>SO<sub>4</sub> solution (1 mL, 2M). A solution of NaOH (4 mL, 1M) was added to tune pH to 10 and the resulting solution was stirred for 1 h. The aqueous layer was extracted with Et<sub>2</sub>O (3 x 20 mL) and the organic layers were combined, dried, and concentrated. The residue was purified by flash silica gel chromatography (eluent: Hexanes/EtOAc 8:1) to afford product **3o** as white solid (83% yield) (TLC R<sub>f</sub> = 0.50 (Hexanes/EtOAc 4: 1)). **Known compound.**<sup>16</sup> m.p. 81-82 °C. [ $\alpha$ ]<sub>D</sub><sup>20</sup> = +33.0° (c = 0.3, CHCl<sub>3</sub>); <sup>1</sup>H NMR (400 MHz, CDCl<sub>3</sub>)  $\delta$  ppm 7.48-7.25 (m, 5H), 5.19 (s, 1H), 5.08-4.81 (m, 1H), 4.61 (ddd, *J* = 15.6, 13.7, 4.1 Hz, 2H), 1.43 (s, 9H); <sup>13</sup>C NMR (100 MHz, CDCl<sub>3</sub>)  $\delta$  ppm 155.2, 138.3, 128.7, 127.9, 126.8, 85.1 (d, *J* = 175 Hz), 80.0, 54.5(br), 28.3; <sup>19</sup>F NMR (376 MHz, CDCl<sub>3</sub>)  $\delta$  ppm -227.0; IR (neat, cm<sup>-1</sup>): 1684, 1523, 1456, 1173; HPLC analysis: ee = 95%. Chiral AD-H (5% isopropanol - 95% hexanes, 0.7 mL/min): Major t = 13.48 min., Minor t = 14.68 min.

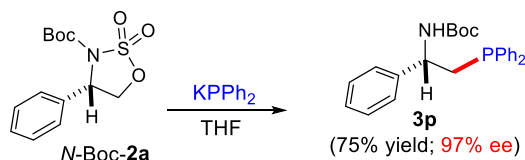

*tert*-Butyl (*S*)-(2-(diphenylphosphanyl)-1-phenylethyl)carbamate (**3p**) was prepared according to the following procedure: KPh<sub>2</sub> (0.32 mL, 0.16 mmol, 0.5 M in THF) was diluted in anhydrous THF (0.8 mL). *N*-Boc-**2a** (0.1 mmol) was added and the mixture was stirred for 30 mins at rt. Then the solvent was removed and the resulting residue was stirred overnight between ether (2 mL) and H<sub>2</sub>SO<sub>4</sub> solution

(1 mL, 2M). A solution of NaOH (4 mL, 1M) was added to tune pH to 10 and the resulting solution was stirred for 1 h. The aqueous layer was extracted with Et<sub>2</sub>O (3 x 20 mL) and the organic layers were combined, dried, and concentrated. The residue was purified by flash silica gel chromatography (eluent: Hexanes/EtOAc 8:1) to afford product **3p** as white solid (75% yield) (TLC R<sub>f</sub> = 0.33 (Hexanes/EtOAc 4: 1). **Known compound.**<sup>17</sup> [ $\alpha$ ]<sub>D</sub><sup>20</sup> = +5.9° (*c* = 1.8, CHCl<sub>3</sub>); <sup>1</sup>H NMR (400 MHz, CDCl<sub>3</sub>)  $\delta$  ppm 7.10-7.41 (m, 15H), 5.07-4.90 (m, 1H), 4.80-4.60 (m, 1H), 2.60-2.40 (m, 2H), 1.37 (s, 9H); <sup>13</sup>C NMR (100 MHz, CDCl<sub>3</sub>)  $\delta$  ppm 154.8, 143.2, 137.9 (d, *J* = 13.0 Hz), 132.9 (d, *J* = 20.0 Hz), 132.8 (d, *J* = 19.0 Hz), 128.7 (d, *J* = 7.0 Hz), 128.6, 128.5 (d, *J* = 3.0 Hz), 128.4 (d, *J* = 2.0 Hz), 127.3, 126.1 (d, *J* = 1.0 Hz), 79.4, 52.9, 37.3 (d, *J* = 16.0 Hz), 28.3; <sup>31</sup>P NMR (100 MHz, CDCl<sub>3</sub>)  $\delta$  ppm -23.3; IR (neat, cm<sup>-1</sup>): 1684, 1500, 1365, 1172; HPLC analysis: ee = 97%. Chiral OD-H (5% isopropanol - 95% hexanes, 0.8 mL/min): Major t = 9.58 min., Minor t = 12.67 min.

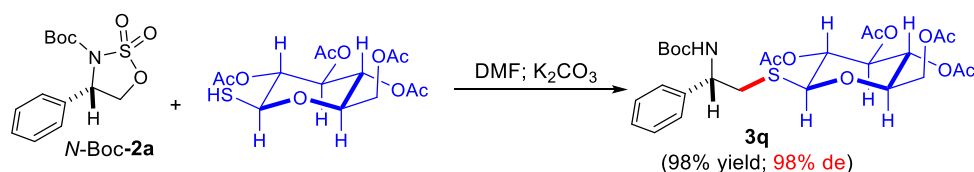

**(2R,3R,4S,5R,6S)-2-(acetoxymethyl)-6-(((S)-2-((tert-butoxycarbonyl)amino)-2-phenylethyl)thio) tetrahydro-2H-pyran-3,4,5-triyl triacetate (**3q**)** was prepared according to the following procedure: an oven-dried Schlenk tube that was previously charged with 1-thio- $\beta$ -D-glucose tetraacetate (25 mg, 0.13 mmol), K<sub>2</sub>CO<sub>3</sub> (10 mg, 0.73 mmol) and *N*-Boc-**2a** (0.067 mmol) was evacuated and backfilled with nitrogen gas. The Teflon screw cap was replaced with a rubber septum and 0.5 ml of DMF was added. The Schlenk tube was then purged with nitrogen for 2 min and the rubber septum was replaced with a Teflon screw cap. The reaction mixture was stirred for 24 h. Then the reaction was quenched by addition of 1 N citric acid (5 mL) and the mixture was stirred for 30 min. After tuning the pH to 12 by adding NaOH (1 M), the aqueous layer was then extracted with DCM (5 x 20 mL) and the organic layers were combined, dried, and concentrated. The residue was purified by flash silica gel chromatography (eluent: EtOAc only) to afford product **3q** as off-white solid (98% yield), TLC R<sub>f</sub> = 0.30 (2:1 Hexanes/EtOAc). [ $\alpha$ ]<sub>D</sub><sup>20</sup> = -11.1° (*c* = 2.1, CHCl<sub>3</sub>); <sup>1</sup>H NMR (600 MHz, CDCl<sub>3</sub>)  $\delta$  ppm 7.39-7.31 (m, 2H), 7.27 (dd, *J* = 7.7, 5.4 Hz, 3H), 5.60 (br. s, 1H), 5.17 (t, *J* = 9.3 Hz, 1H), 5.11 (t, *J* = 9.7 Hz, 1H), 4.99 (t, *J* = 9.6 Hz, 1H), 4.88 (br. s, 1H), 4.39 (d, *J* = 9.9 Hz, 1H), 4.30 (dd, *J* = 12.4, 4.4 Hz, 1H), 4.22 (dd, *J* = 12.4, 2.1

Hz, 1H), 3.68 (ddd,  $J = 9.9, 4.2, 2.3$  Hz, 1H), 3.20-3.10 (m, 1H), 2.98 (dd,  $J = 14.0, 5.4$  Hz, 1H), 2.11 (s, 3H), 2.03 (s, 6H), 1.99 (s, 3H), 1.42 (s, 9H);  $^{13}\text{C}$  NMR (150 MHz,  $\text{CDCl}_3$ )  $\delta$  ppm 170.6, 170.1, 169.3, 155.1, 140.9, 128.6, 127.6, 126.3, 83.3, 79.7, 75.9, 73.6, 69.8, 67.9, 61.8, 54.1, 36.7, 28.3, 20.7, 20.6, 20.5; IR (neat,  $\text{cm}^{-1}$ ): 1754, 1214, 745; HRMS (DART)  $m/z$  calcd for  $\text{C}_{27}\text{H}_{38}\text{NO}_{11}\text{S}^+$   $[\text{M}+\text{H}]^+$ : 584.2160, obsd: 584.2164; **Note:** the chiral center formed via amination was remote to the chiral centers in 1-thio- $\beta$ -D-glucose tetraacetate moiety and the ring-opening products from ( $\pm$ )-*N*-Boc-**2a** and (+)-*N*-Boc-**2a** were identical in  $^1\text{H}$  NMR and  $^{13}\text{C}$  NMR. The HPLC results with all representative columns (more than 20) for the ring-opening products from ( $\pm$ )-*N*-Boc-**2a** and (+)-*N*-Boc-**2a** were identical as a single peak. This is due to the strong interaction between the HPLC stationary phase and sugar moiety. Based on our observation that no racemization was observed during ring-opening processes for all the other reactions, we propose the de is >98%.

#### 5.4. Ring-Opening of $\alpha,\beta$ -Disubstituted Sulfamidates

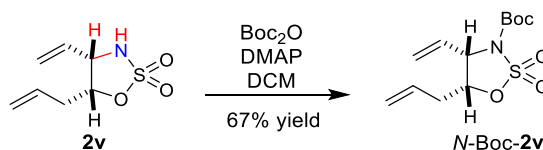

***tert*-Butyl (4*S*,5*R*)-5-allyl-4-vinyl-1,2,3-oxathiazolidine-3-carboxylate 2,2-dioxide (*N*-Boc-**2v**)** was synthesized according to the following procedure: at 0 °C,  $\text{Boc}_2\text{O}$  (69 mg, 1.5 equiv) and DMAP (2 mg) were added to a solution of **2v** (40 mg, 0.21 mmol) in anhydrous DCM (3 mL). The reaction mixture was stirred for 30 min then the solvent was removed. The residue was purified by flash silica gel chromatography (eluent: 8:1 Hexanes/EtOAc) TLC  $R_f = 0.22$  (8: 1 Hexanes/Ethyl acetate) to afford product *N*-Boc-**2v** as colorless oil (67% yield).  $^1\text{H}$  NMR (600 MHz,  $\text{CDCl}_3$ )  $\delta$  ppm 5.88 (ddd,  $J = 17.1, 10.3, 7.8$  Hz, 1H), 5.77-5.67 (m, 1H), 5.50 (d,  $J = 10.7$  Hz, 1H), 5.46 (s, 1H), 5.26-5.23 (m, 1H), 5.23-5.20 (m, 1H), 4.95-4.89 (m, 1H), 4.70-4.64 (m, 1H), 2.58 (ddd,  $J = 14.6, 7.9, 6.5$  Hz, 1H), 2.39 (dt,  $J = 14.7, 6.7$  Hz, 1H), 1.54 (s, 9H);  $^{13}\text{C}$  NMR (150 MHz,  $\text{CDCl}_3$ )  $\delta$  ppm 148.3, 130.1, 129.0, 122.2, 120.3, 85.6, 81.7, 63.1, 33.5, 28.1; IR (neat,  $\text{cm}^{-1}$ ): 1729, 1369, 1318, 1191, 1151; HRMS (DART)  $m/z$  calcd for  $\text{C}_{12}\text{H}_{23}\text{N}_2\text{O}_5\text{S}^+$   $[\text{M}+\text{NH}_4]^+$  307.1322, obsd 307.1325.

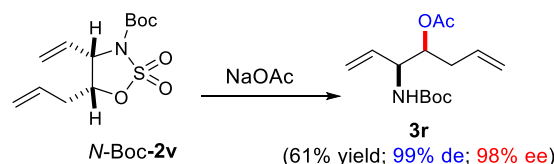

**(3*S*,4*S*)-3-((*tert*-Butoxycarbonyl)amino)hepta-1,6-dien-4-yl acetate (3r)** was prepared according to the following procedure: NaOAc (17.3 mg, 0.21 mmol) was added to a stirred solution of *N*-Boc-2v (0.13 mmol) in DMF (0.8 mL) at rt. After 24 h, the reaction was quenched by addition of 1N citric acid (5 mL) and the mixture was stirred for 30 min. The aqueous layer was then extracted with DCM (3 x 20 mL) and the organic layers were combined, dried, and concentrated. The residue was purified by flash silica gel chromatography (eluent: Hexanes/EtOAc 10:1) to afford product **3r** as colorless oil (61% yield; 99% de) (TLC  $R_f$  = 0.40 (Hexanes/EtOAc 8:1).  $[\alpha]_{\text{D}}^{20}$  =  $-50.0^\circ$  ( $c$  = 1.1,  $\text{CHCl}_3$ );  $^1\text{H}$  NMR (600 MHz,  $\text{CDCl}_3$ )  $\delta$  ppm 5.75 (tt,  $J$  = 10.8, 5.9 Hz, 2H), 5.24-5.19 (m, 1H), 5.18-5.08 (m, 3H), 5.03 (br. s, 1H), 4.75 (d,  $J$  = 8.0 Hz, 1H), 4.37 (br. s, 1H), 2.42-2.31 (m, 2H), 2.03 (s, 3H), 1.46 (s, 9H);  $^{13}\text{C}$  NMR (150 MHz,  $\text{CDCl}_3$ )  $\delta$  ppm 170.4, 155.6, 135.9, 133.0, 118.7, 116.2, 79.8, 74.2, 54.7, 36.1, 28.5, 21.0; IR (neat,  $\text{cm}^{-1}$ ): 1708, 1498, 1368, 1216, 759; HRMS (DART)  $m/z$  calcd for  $\text{C}_{14}\text{H}_{24}\text{NO}_4^+$   $[\text{M}+\text{H}]^+$ : 270.1700, obsd: 270.1699; HPLC analysis: ee = 98%. Chiral IC (3% isopropanol - 97% hexanes, 1.0 mL/min): Major t = 11.75 min., Minor t = 9.05 min.

## 5.5. Synthesis of $\beta$ -Azido- $\alpha$ -Amine Derivatives

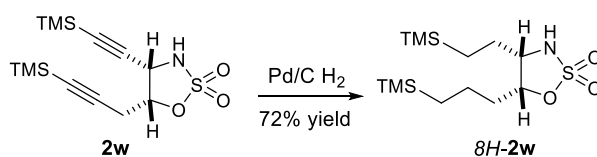

To a round bottom flask, Pd/C (7.0 mg, 10 wt. %) was added, followed by the addition of the amination product **2w** (35 mg, 0.1 mmol) in EtOAc (0.1 mL), and pentane (0.4 mL). The reaction flask was sealed with septum. By connecting to a hydrogen balloon and an oil bubbler through two needles, the hydrogen gas was bubbled through the reaction solution for 30 mins. Then reaction was stirred overnight in hydrogen atmosphere. After removing the Pd/C through filtration with a plug of celite, the reaction mixture was concentrated to afford hydrogenated product **8H-2w** as white solid (72% yield), which was used directly for next step.

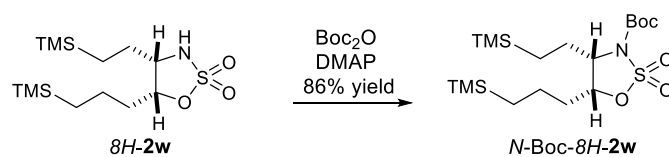

The above hydrogenated product **8H-2w** (26 mg, 0.079 mmol) was dissolved in 0.2 mL DCM and the reaction solution was cooled to 0 °C. Boc<sub>2</sub>O (0.12 mmol) and DMAP (1 mg) were added. The reaction mixture was stirred for 1 h and then the solvent was removed. The residue was purified by flash silica gel chromatography (eluent: 20:1 Hexanes/EtOAc) to afford Boc-protected product **N-Boc-8H-2w** as white solid (86% yield; 99% de), TLC R<sub>f</sub> = 0.35 (20:1 Hexanes/EtOAc). [α]<sup>20</sup><sub>D</sub> = -1.3° (c = 1.9, CHCl<sub>3</sub>); <sup>1</sup>H NMR (500 MHz, CDCl<sub>3</sub>) δ ppm 4.87 (dt, *J* = 9.3, 4.5 Hz, 1H), 4.23 (dd, *J* = 10.7, 5.4 Hz, 1H), 1.95-1.85 (m, 1H), 1.84-1.73 (m, 1H), 1.71-1.61 (m, 2H), 1.55 (s, 9H), 1.46-1.35 (m, 2H), 0.64-0.48 (m, 4H), 0.01 (s, 9H), -0.00 (s, 9H); <sup>13</sup>C NMR (150 MHz, CDCl<sub>3</sub>) δ ppm 149.2, 85.2, 83.8, 62.9, 32.5, 28.1, 23.2, 20.4, 16.6, 11.9, -1.6, -1.8; IR (neat, cm<sup>-1</sup>): 1214, 749, 730; HRMS (DART) *m/z* calcd for C<sub>18</sub>H<sub>43</sub>N<sub>2</sub>O<sub>5</sub>SSi<sub>2</sub><sup>+</sup> [M+NH<sub>4</sub>]<sup>+</sup> 455.2426, obsd 455.2418.

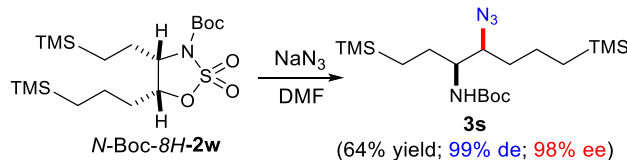

**tert-Butyl ((3S,4S)-4-azido-1,7-bis(trimethylsilyl)heptan-3-yl)carbamate (3s)** was prepared according to the following procedure: NaN<sub>3</sub> (12.9 mg, 0.19 mmol) was added to a stirred solution of Boc-protected product **N-Boc-8H-2w** (0.07 mmol) in DMF (0.4 mL) at rt. After 24 h, the reaction mixture was stirred for 30 min between ether (2 mL) and 1N citric acid (2 mL). The aqueous layer was extracted with Et<sub>2</sub>O (3 x 10 mL) and the organic layers were combined, dried, and concentrated. The residue was purified by flash silica gel chromatography (eluent: 20:1 Hexanes/EtOAc) to afford product **3s** as colorless oil (64% yield; 99% de), TLC R<sub>f</sub> = 0.53 (20: 1 Hexanes/EtOAc). [α]<sup>20</sup><sub>D</sub> = -12.5° (c = 0.4, CHCl<sub>3</sub>); <sup>1</sup>H NMR (500 MHz, CDCl<sub>3</sub>) δ ppm 4.47 (d, *J* = 9.8 Hz, 1H), 3.61-3.56 (m, 1H), 3.56-3.50 (m, 1H), 1.68-1.52 (m, 3H), 1.52-1.45 (m, 3H), 1.44 (s, 9H), 0.61-0.44 (m, 4H), -0.00 (s, 9H), -0.01 (s, 9H); <sup>13</sup>C NMR (150 MHz, CDCl<sub>3</sub>) δ ppm 160.0, 79.4, 65.3, 55.9, 35.8, 28.5, 28.0, 20.9, 16.7, 13.1, -1.54, -1.67; IR (neat, cm<sup>-1</sup>): 2952, 2098, 1703, 1499, 1247, 1167, 831, 754; HRMS (DART) *m/z* calcd for

$C_{18}H_{41}N_4O_2Si_2^+ [M+H]^+$ : 401.2763, obsd 401.2760; this product is not UV active, ee was determined to be >98% based on the  $^1H$  NMR analysis of racemic and enantioenriched samples by adding chiral lanthanide shift reagent  $Eu(hfc)_3$  (2.0 equiv) in  $CDCl_3$  (see the spectrum section for detail).

## 5.6. Ring-Opening of Fused-Bicyclic Sulfamidates

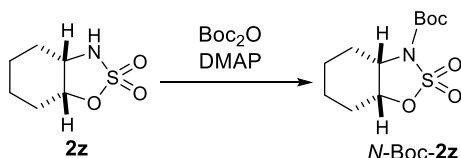

***tert*-Butyl (3*aS*,7*aR*)-hexahydro-3*H*-benzo[*d*][1,2,3]oxathiazole-3-carboxylate 2,2-dioxide (*N*-Boc-**2z**)** was prepared according to the following procedure: at 0 °C,  $Boc_2O$  (130 mg, 1.5 equiv) and DMAP (2 mg) were added to a solution of **2z** (80 mg, 0.45 mmol) in anhydrous DCM (4 mL). The reaction mixture was stirred for 30 mins and then the solvent was removed. The residue was purified by flash silica gel chromatography (eluent: Hexanes/EtOAc 8:1) to afford product *N*-Boc-**2z** as white solid (90% yield). m.p. 131-132 °C.  $^1H$  NMR (400 MHz,  $CDCl_3$ )  $\delta$  ppm 4.95 (dd,  $J = 6.6, 3.4$  Hz, 1H), 4.14 (ddd,  $J = 10.6, 6.0, 4.3$  Hz, 1H), 2.30 (ddd,  $J = 8.1, 4.7, 2.4$  Hz, 2H), 1.86-1.58 (m, 5H), 1.53 (s, 9H) 1.22 (ddd,  $J = 12.9, 8.4, 3.3$  Hz, 1H);  $^{13}C$  NMR (100 MHz,  $CDCl_3$ )  $\delta$  ppm 148.4, 85.0, 79.1, 57.5, 27.9, 27.2, 27.0, 21.8, 18.9; IR (neat,  $cm^{-1}$ ): 1686; HRMS (DART)  $m/z$  calcd for  $C_{11}H_{19}NNaO_5S^+ [M+Na]^+$ : 300.0876, obsd: 300.0880.

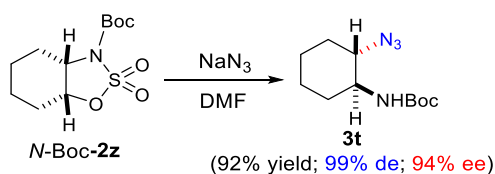

***tert*-Butyl ((1*S*,2*S*)-2-azidocyclohexyl)carbamate (**3t**)** was prepared according to the following procedure:  $NaN_3$  (10.2 mg, 0.16 mmol) was added to a stirred solution of *N*-Boc-**2z** (0.10 mmol) in DMF (0.8 mL) at r.t. After 24 h, the solvent was removed and the resulting residue was stirred overnight between ether (2 mL) and  $H_2SO_4$  solution (1 mL, 2M). A solution of NaOH (4 mL, 1M) was added to tune pH to 10 and the resulting solution was stirred for 1 h. The aqueous layer was extracted with  $Et_2O$  (3 x 20 mL) and the organic layers were combined, dried, and concentrated. The residue was purified

by flash silica gel chromatography (eluent: 8:1 Hexanes/EtOAc) to afford product **3t** as white solid (92% yield; 99% de), TLC  $R_f = 0.33$  (4:1 Hexanes/EtOAc). **Known compound.**<sup>18</sup> m.p. 58-60 °C.  $[\alpha]_D^{20} = -2.0^\circ$  ( $c = 0.7$ ,  $\text{CHCl}_3$ );  $^1\text{H NMR}$  (400 MHz,  $\text{CDCl}_3$ )  $\delta$  ppm 4.61-4.35 (m, 1H), 3.40 (d,  $J = 9.4$  Hz, 1H), 3.15-3.05 (m, 1H), 2.12-1.97 (m, 2H), 1.82-1.62 (m, 2H), 1.45 (m, 9H), 1.41-1.11 (m, 4H);  $^{13}\text{C NMR}$  (100 MHz,  $\text{CDCl}_3$ )  $\delta$  ppm 155.3, 79.6, 64.3, 53.9, 32.2, 30.6, 28.3, 24.3, 24.0. IR (neat,  $\text{cm}^{-1}$ ): 3359, 2954, 2107, 1684, 1166; HPLC analysis: ee = 94%. Chiral AD-H (3% isopropanol - 97% hexanes, 0.8 mL/min): Major t = 15.87 min., Minor t = 12.77 min.

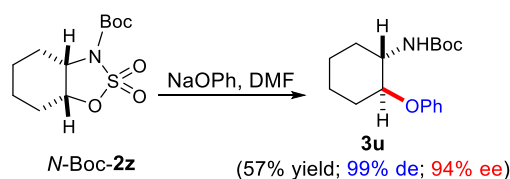

**tert-Butyl ((1S,2S)-2-phenoxy-2-phenoxycyclohexyl)carbamate (3u)** was prepared according to the following procedure: NaOPh (18.5 mg, 0.16 mmol) was added to a stirred solution of *N*-Boc-**2z** (0.1 mmol) in DMF (0.8 mL) at r.t. After 4 h, the solvent was removed and the resulting residue was stirred overnight between ether (2 mL) and  $\text{H}_2\text{SO}_4$  solution (1 mL, 2M). A solution of NaOH (4 mL, 1M) was added to tune pH to 10 and the resulting solution was stirred for 1 h. The aqueous layer was extracted with  $\text{Et}_2\text{O}$  (3 x 20 mL) and the organic layers were combined, dried, and concentrated. The residue was purified by flash silica gel chromatography (eluent: 8:1 Hexanes/EtOAc) to afford product **3u** as white solid (57% yield; 99% de), TLC  $R_f = 0.23$  (4:1 Hexanes/EtOAc). **Known compound.**<sup>19</sup> m.p. 107-108 °C.  $[\alpha]_D^{20} = +9.0^\circ$  ( $c = 0.7$ ,  $\text{CHCl}_3$ );  $^1\text{H NMR}$  (400 MHz,  $\text{CDCl}_3$ )  $\delta$  ppm 7.30-7.25 (m, 2H), 6.96-6.91 (m, 3H), 4.66-4.37 (m, 1H), 4.03 (td,  $J = 9.09, 3.90$  Hz, 1H), 3.84-3.56 (m, 1H), 2.13-2.03 (m, 2H), 1.84-1.73 (m, 1H), 1.67-1.60 (m, 1H), 1.52-1.22 (m, 13H);  $^{13}\text{C NMR}$  (100 MHz,  $\text{CDCl}_3$ )  $\delta$  ppm 158.1, 155.6, 129.4, 120.8, 116.1, 77.2, 53.2, 36.8, 30.9, 29.8, 28.3, 23.7, 23.2; IR (neat,  $\text{cm}^{-1}$ ): 1698, 1492, 1242, 1170; HPLC analysis: ee = 94%. Chiral AS-H (3% isopropanol - 97% hexanes, 0.8 mL/min); Major t = 12.29 min., Minor t = 15.83 min.

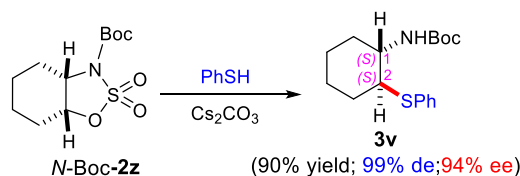

**tert-Butyl ((1*S*,2*S*)-2-(phenylthio)cyclohexyl)carbamate (**3v**)** was prepared according to the following procedure: powdered Cs<sub>2</sub>CO<sub>3</sub> (87.7 mg, 0.27 mmol) was added to a stirred solution of *N*-Boc-**2z** (0.1 mmol) and PhSH (29.7 mg, 0.27 mmol) in DMF (0.8 mL) at r.t. After 4 h, the solvent was removed and the resulting residue was stirred overnight between ether (2 mL) and H<sub>2</sub>SO<sub>4</sub> solution (1 mL, 2M). A solution of NaOH (4 mL, 1M) was added to tune pH to 10 and the resulting solution was stirred for 1 h. The aqueous layer was extracted with Et<sub>2</sub>O (3 x 20 mL) and the organic layers were combined, dried, and concentrated. The residue was purified by flash silica gel chromatography (eluent: 8:1 Hexanes/EtOAc) to afford product **3v** as white solid (90% yield; 99% de), TLC R<sub>f</sub> = 0.33 (4:1 Hexanes/EtOAc). m.p. 102-104 °C. [α]<sub>D</sub><sup>20</sup> = +38.0° (*c* = 0.6, CHCl<sub>3</sub>); <sup>1</sup>H NMR (600 MHz, CDCl<sub>3</sub>) δ ppm 7.45 (d, *J* = 7.1 Hz, 2H), 7.33-7.23 (m, 3H), 4.67 (s, 1H), 3.39 (d, *J* = 5.5 Hz, 1H), 2.87 (td, *J* = 10.6, 3.5 Hz, 1H), 2.19 (d, *J* = 10.8 Hz, 1H), 2.06 (dd, *J* = 9.9, 4.0 Hz, 1H), 1.68 (dd, *J* = 23.7, 10.0 Hz, 2H), 1.45 (s, 9H), 1.43-1.38 (m, 1H), 1.36-1.14 (m, 3H); <sup>13</sup>C NMR (100 MHz, CDCl<sub>3</sub>) δ ppm 155.3, 133.8, 133.2, 128.8, 127.3, 79.2, 53.5, 52.2, 33.7, 33.0, 28.4, 25.6, 24.4; IR (neat, cm<sup>-1</sup>): 3346, 2932, 1698, 1532; HRMS (DART) *m/z* calcd for C<sub>17</sub>H<sub>26</sub>NO<sub>2</sub>S<sup>+</sup> [M+H]<sup>+</sup>: 308.1679, obsd: 308.1678; HPLC analysis: ee = 94%. Chiral AD-H (2% isopropanol - 98% hexanes, 1.0 mL/min); Major t = 26.31 min., Minor t = 21.07 min. 1-[*S*], 2-[*S*] absolute configuration of the product was determined by X-ray crystallography.

## 5.7. Synthesis of 1,2,3-Trifunctionalized Cyclohexane Derivatives via Ring-Opening of Cyclohexane-Fused Sulfamidates

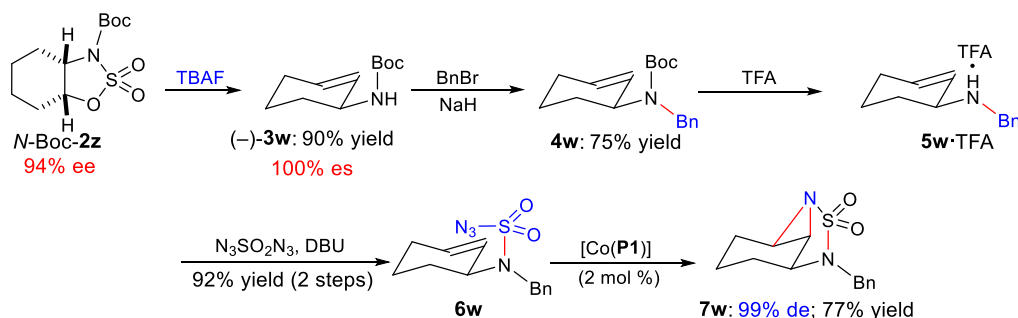



***tert*-Butyl (*S*)-cyclohex-2-en-1-ylcarbamate (**3w**)** was prepared according to the following procedure: TBAF (41.7 mg, 0.16 mmol) was dissolved in anhydrous CH<sub>3</sub>CN (0.8 mL). *N*-Boc-**2z** (0.1 mmol) was added and the mixture was stirred for 30 min at rt. Then the solvent was removed and the resulting residue was stirred overnight between ether (2 mL) and H<sub>2</sub>SO<sub>4</sub> solution (1 mL, 2M). A solution of NaOH (4 mL, 1M) was added to tune pH to 10 and the resulting solution was stirred for 1 h. The aqueous layer was extracted with Et<sub>2</sub>O (3 x 20 mL) and the organic layers were combined, dried, and concentrated. The residue was purified by flash silica gel chromatography (eluent: 8:1 Hexanes/EtOAc) to afford product **3w** as white solid (90% yield), TLC R<sub>f</sub> = 0.43 (4:1 Hexanes/EtOAc). **Known compound.**<sup>20</sup> m.p. 40-42 °C. [α]<sub>D</sub><sup>20</sup> = -89.0° (c = 0.4, CHCl<sub>3</sub>); <sup>1</sup>H NMR (400 MHz, CDCl<sub>3</sub>) δ ppm 5.80 (dtd, J = 9.5, 3.6, 1.9 Hz, 1H), 5.60 (ddd, J = 9.9, 5.2, 2.3 Hz, 1H), 4.51 (br. s, 1H), 4.14 (br. s, 1H), 2.02-1.94 (m, 2H), 1.92-1.83 (m, 1H), 1.68-1.58 (m, 2H), 1.56-1.49 (m, 1H), 1.44 (s, 9H); <sup>13</sup>C NMR (150 MHz, CDCl<sub>3</sub>) δ ppm 155.4, 130.5, 128.3, 79.3, 45.9, 30.0, 28.6, 25.0, 19.8; IR (neat, cm<sup>-1</sup>): 1702, 1500, 1170; HPLC analysis: ee = 94%. Chiral IC (2% isopropanol - 98% hexanes, 1.0 mL/min): Major t = 11.39 min., Minor t = 10.52 min. **Note:** a scale-up process provided 80.0 mg of product for the following further transformation.

**(*S*)-*N*-Benzylcyclohex-2-en-1-amine (**5w**)** was synthesized according to the following procedure: in a

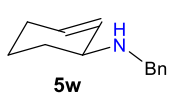

flame-dried Schlenk tube, the above synthesized ***tert*-butyl (*S*)-cyclohex-2-en-1-ylcarbamate (**3w**)** (80.0 mg, 0.41 mmol), NaH (23.0 mg, 0.60 mmol) were charged. The tube was evacuated and back-filled with argon three times. The solids were dissolved in anhydrous THF (4 mL) at 0 °C. To this suspension, benzyl bromide (50 μL, 0.45 mmol) was added slowly via syringe. The tube was sealed and stirred for 16 h at room temperature. Then the solvent was removed. The residue was purified by flash silica gel chromatography (eluent: 20:1 Hexanes/EtOAc) to afford product 84.0 mg of **4w** as colorless oil (71% yield), TLC R<sub>f</sub> = 0.63 (10:1 Hexanes/EtOAc), which was used directly for next step. The above synthesized **4w** (80.0 mg, 0.28 mmol) was dissolved in DCM (1 mL). Then trifluoroacetic acid (214 μL, 2.78 mmol) was added. The reaction mixture was stirred at room temperature for 16 hours. Then the solvent was removed and **5w**·TFA salt was used for next step (full conversion). For **5w** free base: <sup>1</sup>H NMR (600 MHz, CDCl<sub>3</sub>) δ ppm 7.38-7.29 (m, 4H), 7.26-7.20

(m, 1H), 5.77 (dtd,  $J = 10.2, 3.3, 1.5$  Hz, 1H), 5.73 (dd,  $J = 10.2, 2.2$  Hz, 1H), 3.86, 3.82 (AB q,  $J = 13.0$  Hz, each 1H), 3.21 (dtd,  $J = 7.2, 4.9, 2.5$  Hz, 1H), 2.05-1.92 (m, 2H), 1.89 (dddd,  $J = 12.9, 7.8, 5.1, 2.5$  Hz, 1H), 1.74 (ddtd,  $J = 12.3, 7.1, 5.1, 2.4$  Hz, 1H), 1.56 (dddt,  $J = 12.8, 10.3, 4.6, 2.5$  Hz, 1H), 1.49 (dddd,  $J = 13.1, 10.4, 7.3, 2.5$  Hz, 1H), 1.34 (s, 1H);  $^{13}\text{C}$  NMR (150 MHz,  $\text{CDCl}_3$ )  $\delta$  ppm 140.9, 130.1, 129.1, 128.5, 128.3, 127.0, 52.5, 51.1, 29.6, 25.5, 20.4; IR (neat,  $\text{cm}^{-1}$ ): 3023, 2927, 1738, 1452, 1216, 697; HRMS (DART)  $m/z$  calcd for  $\text{C}_{13}\text{H}_{18}\text{N}^+$   $[\text{M}+\text{H}]^+$ : 188.1434, obsd: 188.1444.

**(S)-(((Azidosulfonyl)(cyclohex-2-en-1-yl)amino)methyl)benzene (6w)** was synthesized according to

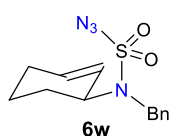

the following procedure: **sulphuryl diazide** ( $\text{N}_3\text{SO}_2\text{N}_3$ ) was prepared according to the following procedure: sulfur chloride (9.72 mL, 120 mmol) was added dropwise for 1 hour to a solution of sodium azide (29.25 g, 450 mmol) and pyridine (19.44 mL, 250 mmol) in acetonitrile (600 mL) at 0 °C. Then the reaction mixture was stirred for one hour at room temperature followed by the addition of 100 mL DCM. The mixture was poured into ice-cold water and extracted with DCM (3 x 100 mL). The combined organic layer was washed sequentially with hydrochloric acid (1 mol/L in  $\text{H}_2\text{O}$ ), water, potassium hydroxide (1 mol/L in  $\text{H}_2\text{O}$ ), hydrochloric acid (1 mol/L in  $\text{H}_2\text{O}$ ), and water. After drying ( $\text{Na}_2\text{SO}_4$ ), the sulphuryl azide solution was used directly for the further reaction. This solution (0.3 M in DCM) can be stored in the refrigerator at -20 °C for at least two years without significant decomposition. A mixture of above synthesized **5w·TFA** (**(S)-N-benzylcyclohex-2-en-1-amine TFA salt**) (0.27 mmol) and DBU (230.0 mg, 0.86 mmol) in DCM (0.5 mL) was added dropwise via pipette to a solution of  $\text{N}_3\text{SO}_2\text{N}_3$  in DCM (0.3 M) (1.8 mL, 0.54 mmol) at 0 °C. After the reaction was completed based on TLC (~ 1 hour), the majority of the solvent was removed under reduced pressure at room temperature. The residue was purified by flash silica gel chromatography (eluent: 20:1 Hexanes/EtOAc) to afford 74.0 mg of product **6w** as colorless oil (92% yield, TLC  $R_f = 0.65$  (10:1 Hexanes/EtOAc)).  $^1\text{H}$  NMR (600 MHz,  $\text{CDCl}_3$ )  $\delta$  ppm 7.39-7.32 (m, 4H), 7.31-7.26 (m, 1H), 6.01-5.93 (m, 1H), 5.61 (dt,  $J = 10.2, 2.0$  Hz, 1H), 4.62 (ddd,  $J = 8.6, 5.5, 2.9$  Hz, 1H), 4.52, 4.34 (AB q,  $J = 16.3$  Hz, each 1H), 2.02-1.92 (m, 3H), 1.81-1.71 (m, 1H), 1.64-1.48 (m, 2H);  $^{13}\text{C}$  NMR (150 MHz,  $\text{CDCl}_3$ )  $\delta$  ppm 137.3, 133.7, 128.7, 127.8, 127.6, 126.1, 58.0, 49.2, 28.3, 24.4, 21.6; IR (neat,  $\text{cm}^{-1}$ ): 2936, 2119, 1378, 1168, 729.

**(2a1*R*,2b*R*,5a*S*)-1-benzylhexahydro-1*H*-2-thia-1,2a-diazacyclopropa[*cd*]indene 2,2-dioxide (**7w**)**

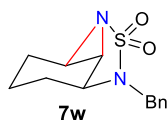

was synthesized according to the following procedure: an oven-dried Schlenk tube that was previously charged with catalyst [Co(**P1**)] (11.8 mg, 0.0095 mmol) and 4Å molecular sieves (50 mg), was evacuated and backfilled with nitrogen gas. The Teflon screw cap was replaced with a rubber septum and 2.5 mL of benzene was added followed by azide (70 mg, 0.24 mmol). The Schlenk tube was then purged with nitrogen for 2 minutes and the rubber septum was replaced with a Teflon screw cap. The reaction mixture was then stirred for 8 hours at 80 °C. The residue was purified by flash silica gel chromatography (eluent: 5:1 Hexanes/EtOAc) to afford 49.2 mg of **7w** as white solid (77% yield; 99% de), TLC  $R_f = 0.53$  (3:1 Hexanes/EtOAc).  $^1\text{H}$  NMR (600 MHz,  $\text{CDCl}_3$ )  $\delta$  ppm 7.40-7.29 (m, 5H), 4.41, 3.87 (AB q,  $J = 15.2$  Hz, each 1H), 3.85-3.83 (m, 1H), 3.47 (dd,  $J = 7.0, 5.2$  Hz, 1H), 2.89 (ddd,  $J = 6.5, 5.2, 1.6$  Hz, 1H), 2.61-2.52 (m, 1H), 2.11-2.02 (m, 1H), 1.67-1.58 (m, 2H), 1.58-1.50 (m, 1H), 1.24 (dt,  $J = 5.6, 1.9$  Hz, 1H);  $^{13}\text{C}$  NMR (150 MHz,  $\text{CDCl}_3$ )  $\delta$  ppm 135.0, 128.9, 128.7, 128.3, 51.2, 47.6, 42.9, 42.6, 22.1, 17.6, 14.0; IR (neat,  $\text{cm}^{-1}$ ): 2925, 1741, 1306, 1157. HRMS (DART)  $m/z$  calcd for  $\text{C}_{13}\text{H}_{17}\text{N}_2\text{O}_2\text{S}^+ [\text{M}+\text{H}]^+$ : 265.1005, obsd: 265.1007.

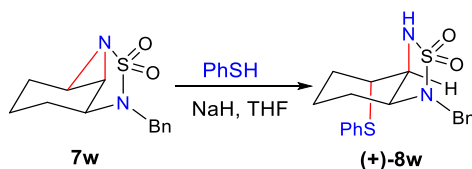

**Compound 8w** was prepared according to the following procedure: at 0 °C, to a solution of PhSH (9.4

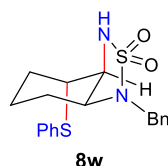

mg, 0.085 mmol) in THF (0.5 mL) was added NaH (3.3 mg, 0.085 mmol). After stirring for 0.5 h at the same temperature, a solution of **7w** (15 mg, 0.056 mmol) in THF (0.5 mL) was added dropwise. The reaction mixture was stirred at 0 °C for 1 hour, quenched by 1 M HCl solution (1 mL). The organic phase was extracted by DCM (15.0 mL) with three times, the combined organic layers were dried over ( $\text{NaSO}_4$ ), filtered, concentrated. The residue was purified by flash silica gel chromatography (eluent: 7:1 Hexanes/EtOAc) to afford 18 mg of ring-opening product **8w** as white solid (80% yield; 99% de), TLC  $R_f = 0.50$  (5:1 Hexanes/EtOAc).  $[\alpha]_D^{20} = +48.0^\circ$  ( $c = 0.8$ ,  $\text{CHCl}_3$ );  $^1\text{H}$  NMR (600 MHz,  $\text{CDCl}_3$ )  $\delta$  ppm 7.47 (dd,  $J = 6.5, 3.1$  Hz, 2H), 7.44-7.39 (m, 2H), 7.36-7.32 (m, 5H), 7.31-7.27 (m, 1H), 5.13 (s, 1H), 4.46, 3.91 (AB q,  $J = 15.4$  Hz, each 1H),

3.78 (q,  $J = 3.9$  Hz, 1H), 3.38 (td,  $J = 11.3, 10.7, 3.8$  Hz, 1H), 3.27 (ddd,  $J = 9.7, 4.8, 1.3$  Hz, 1H), 2.10-1.95 (m, 1H), 1.92-1.81 (m, 1H), 1.47-1.36 (m, 1H), 1.36-1.21 (m, 3H);  $^{13}\text{C}$  NMR (125 MHz,  $\text{CDCl}_3$ )  $\delta$  ppm 136.0, 134.9, 130.9, 129.4, 128.8, 128.7, 128.6, 128.0, 59.7, 57.1, 49.8, 48.8, 31.0, 26.3, 19.9; **the 5-membered ring structure was assigned unambiguously with H-H COSY, see spectrum section for details**; IR (neat  $\text{cm}^{-1}$ ): 3462, 3015, 2969, 2944, 1738, 1365, 1228, 1216; HRMS (DART)  $m/z$  calcd for  $\text{C}_{19}\text{H}_{23}\text{N}_2\text{O}_2\text{S}^+$   $[\text{M}+\text{H}]^+$ : 375.1196, obsd: 375.1194; HPLC analysis: ee = 93%. Chiral IA (30% isopropanol - 70% hexanes, 1.0 mL/min); Major t = 12.41 min., Minor t = 8.76 min.

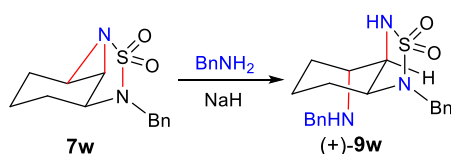

**Compound 9w** was prepared according to the following procedure: to a solution of **7w** (15 mg, 0.056

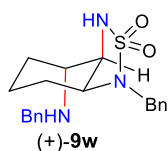

mmol) in THF (1 mL) and  $\text{BnNH}_2$  (12 mg, 0.11 mmol) was added triethyl amine (11 mg, 0.11 mmol). The reaction mixture was stirred under reflux for 16 h. Then the solvent was removed and the residue was purified by flash silica gel chromatography (eluent:

Hexanes/EtOAc 1:1 with triethyl amine-neutralized silica gel) to afford 15 mg of ring opening product

**3y** as colorless oil (71% yield; 99% de) (TLC  $R_f = 0.10$  (EtOAc only)).  $[\alpha]_D^{20} = +104.0$  ( $c = 0.8$ ,  $\text{CHCl}_3$ );

for HCl salt of **9w**:  $^1\text{H}$  NMR (600 MHz,  $\text{CDCl}_3$ )  $\delta$  ppm 10.15 (s, 1H), 8.88 (s, 1H), 7.59 (d,  $J = 7.1$  Hz,

2H), 7.37 (t,  $J = 7.8$  Hz, 3H), 7.27-7.21 (m, 5H), 4.43 (dt,  $J = 13.7, 4.3$  Hz, 1H), 4.38, 3.87 (AB q,  $J =$

16.1 Hz, each 1H), 4.05 (ddd,  $J = 29.2, 9.3, 3.9$  Hz, 2H), 3.89 (s, 1H), 3.35 (d,  $J = 10.6$  Hz, 1H), 1.96-

1.89 (m, 1H), 1.79-1.64 (m, 2H), 1.49 (ddd,  $J = 15.8, 10.7, 3.9$  Hz, 1H), 1.33 (dt,  $J = 13.8, 3.8$  Hz, 1H),

0.95-0.82 (m, 1H);  $^{13}\text{C}$  NMR (150 MHz,  $\text{CDCl}_3$ )  $\delta$  ppm 136.1, 130.3, 129.8, 129.7, 129.3, 128.6, 128.3,

127.9, 62.2, 56.1, 55.0, 48.6, 47.9, 25.6, 25.3, 17.9; **the 5-membered ring structure was assigned**

**unambiguously with H-H COSY, see spectrum section for details**; IR (neat,  $\text{cm}^{-1}$ ): 3267, 2935, 1454,

1154, 697; HRMS (DART)  $m/z$  calcd for  $\text{C}_{20}\text{H}_{26}\text{N}_3\text{O}_2\text{S}^+$   $[\text{M}+\text{H}]^+$ : 372.1740, obsd: 372.1748; HPLC

analysis: ee = 94%. Chiral IA (20% isopropanol - 80% hexanes, 1.2 mL/min); Major t = 13.26 min.,

Minor t = 11.42 min.

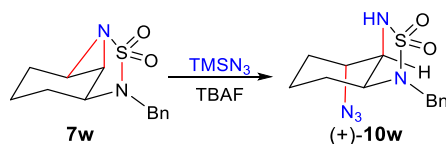

**Compound 10w** was prepared according to the following procedure: to a solution of **7w** (15 mg, 0.056

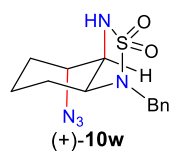

mmol) and TMSN<sub>3</sub> (7.2 mg, 0.062 mmol) in THF (1 mL) was added tetrabutylammonium fluoride (18 μL, 1 M solution in THF, 0.062 mmol). The reaction mixture was stirred at room temperature for 1 h. The solvent was removed and the residue was purified by flash silica gel chromatography (eluent: Hexanes/EtOAc 4:1) to afford 17 mg of ring-opening product **10w** as colorless oil (97% yield; 99% de) (TLC R<sub>f</sub> = 0.25 (Hexanes/EtOAc 3:1)). [α]<sub>D</sub><sup>20</sup> = +110.6 (*c* = 0.8, CHCl<sub>3</sub>); <sup>1</sup>H NMR (600 MHz, CDCl<sub>3</sub>) δ ppm 7.44-7.28 (m, 5H), 4.82 (s, 1H), 4.46, 3.95 (AB q, *J* = 15.6 Hz, each 1H), 3.93-3.90 (m, 1H), 3.78 (t, *J* = 4.1 Hz, 1H), 3.28 (dd, *J* = 9.1, 4.9 Hz, 1H), 2.05-1.97 (m, 1H), 1.89 (dd, *J* = 15.6, 3.7 Hz, 1H), 1.53-1.37 (m, 2H), 1.36-1.23 (m, 2H); **the 5-membered ring structure was assigned unambiguously with H-H COSY, see spectrum section for details**; <sup>13</sup>C NMR (150 MHz, CDCl<sub>3</sub>) δ ppm 135.8, 128.8, 128.5, 128.1, 61.2, 60.3, 58.2, 48.4, 28.4, 26.0, 18.1; IR (neat cm<sup>-1</sup>): 3252, 2928, 2100, 1738, 1365, 1160; HRMS (DART) *m/z* calcd for C<sub>13</sub>H<sub>18</sub>N<sub>5</sub>O<sub>2</sub>S<sup>+</sup> [M+H]<sup>+</sup>: 308.1176, obsd: 308.1180; HPLC analysis: ee = 94%. Chiral IC (30% isopropanol - 70% hexanes, 1.0 mL/min); Major t = 20.36 min., Minor t = 17.09 min.

## 6. X-ray Crystallography

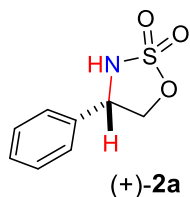

Table 1. Crystal data and structure refinement for **2a**. (CCDC 2097084)

|                                   |                                               |                       |
|-----------------------------------|-----------------------------------------------|-----------------------|
| Identification code               | C8H9NO3S                                      |                       |
| Empirical formula                 | C8 H9 N O3 S                                  |                       |
| Formula weight                    | 199.22                                        |                       |
| Temperature                       | 100(2) K                                      |                       |
| Wavelength                        | 1.54178 Å                                     |                       |
| Crystal system                    | Orthorhombic                                  |                       |
| Space group                       | P2 <sub>1</sub> 2 <sub>1</sub> 2 <sub>1</sub> |                       |
| Unit cell dimensions              | a = 4.7540(2) Å                               | $\alpha = 90^\circ$ . |
|                                   | b = 11.9215(4) Å                              | $\beta = 90^\circ$ .  |
|                                   | c = 15.2976(5) Å                              | $\gamma = 90^\circ$ . |
| Volume                            | 866.99(5) Å <sup>3</sup>                      |                       |
| Z                                 | 4                                             |                       |
| Density (calculated)              | 1.526 Mg/m <sup>3</sup>                       |                       |
| Absorption coefficient            | 3.128 mm <sup>-1</sup>                        |                       |
| F(000)                            | 416                                           |                       |
| Crystal size                      | 0.460 x 0.240 x 0.130 mm <sup>3</sup>         |                       |
| Theta range for data collection   | 4.702 to 70.187°.                             |                       |
| Index ranges                      | -5 ≤ h ≤ 5, -14 ≤ k ≤ 14, -18 ≤ l ≤ 18        |                       |
| Reflections collected             | 12526                                         |                       |
| Independent reflections           | 1637 [R(int) = 0.0295]                        |                       |
| Completeness to theta = 67.679°   | 100.0 %                                       |                       |
| Absorption correction             | Semi-empirical from equivalents               |                       |
| Max. and min. transmission        | 0.7533 and 0.5852                             |                       |
| Refinement method                 | Full-matrix least-squares on F <sup>2</sup>   |                       |
| Data / restraints / parameters    | 1637 / 1 / 121                                |                       |
| Goodness-of-fit on F <sup>2</sup> | 1.094                                         |                       |
| Final R indices [I > 2σ(I)]       | R1 = 0.0228, wR2 = 0.0615                     |                       |
| R indices (all data)              | R1 = 0.0229, wR2 = 0.0616                     |                       |
| Absolute structure parameter      | -0.001(5)                                     |                       |
| Extinction coefficient            | n/a                                           |                       |
| Largest diff. peak and hole       | 0.230 and -0.272 e.Å <sup>-3</sup>            |                       |

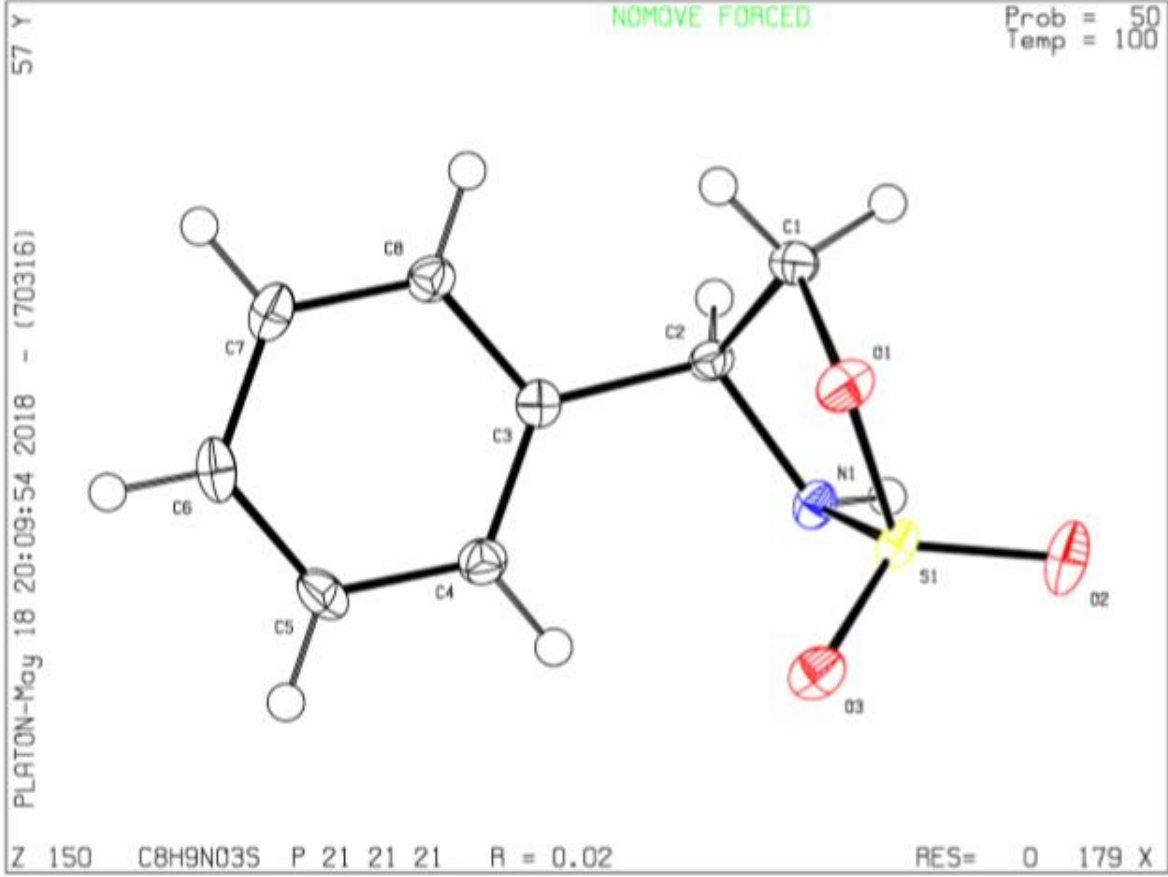

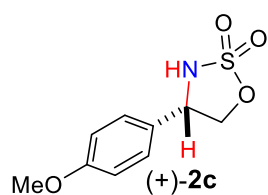

Table 2. Crystal data and structure refinement for **2c**. (CCDC 2097091)

|                                    |                                                  |
|------------------------------------|--------------------------------------------------|
| Identification code                | <b>2c</b>                                        |
| Empirical formula                  | C <sub>9</sub> H <sub>11</sub> NO <sub>4</sub> S |
| Formula weight                     | 229.25                                           |
| Temperature/K                      | 228.15                                           |
| Crystal system                     | orthorhombic                                     |
| Space group                        | P2 <sub>1</sub> 2 <sub>1</sub> 2 <sub>1</sub>    |
| a/Å                                | 5.32350(9)                                       |
| b/Å                                | 8.25340(10)                                      |
| c/Å                                | 22.6205(3)                                       |
| α/°                                | 90                                               |
| β/°                                | 90                                               |
| γ/°                                | 90                                               |
| Volume/Å <sup>3</sup>              | 993.88(2)                                        |
| Z                                  | 4                                                |
| ρ <sub>calc</sub> /cm <sup>3</sup> | 1.532                                            |
| μ/mm <sup>-1</sup>                 | 2.888                                            |
| F(000)                             | 480.0                                            |
| Crystal size/mm <sup>3</sup>       | 0.4 × 0.2 × 0.2                                  |
| Radiation                          | CuKα (λ = 1.54178)                               |
| 2θ range for data collection/°     | 7.816 to 141.884                                 |



|                                                |                                                               |
|------------------------------------------------|---------------------------------------------------------------|
| Index ranges                                   | $-5 \leq h \leq 6, -9 \leq k \leq 10, -27 \leq l \leq 27$     |
| Reflections collected                          | 12145                                                         |
| Independent reflections                        | 1817 [ $R_{\text{int}} = 0.0408, R_{\text{sigma}} = 0.0244$ ] |
| Data/restraints/parameters                     | 1817/0/141                                                    |
| Goodness-of-fit on $F^2$                       | 1.076                                                         |
| Final R indexes [ $I \geq 2\sigma(I)$ ]        | $R_1 = 0.0322, wR_2 = 0.0811$                                 |
| Final R indexes [all data]                     | $R_1 = 0.0330, wR_2 = 0.0816$                                 |
| Largest diff. peak/hole / $e \text{ \AA}^{-3}$ | 0.27/-0.27                                                    |
| Flack parameter                                | 0.043(12)                                                     |

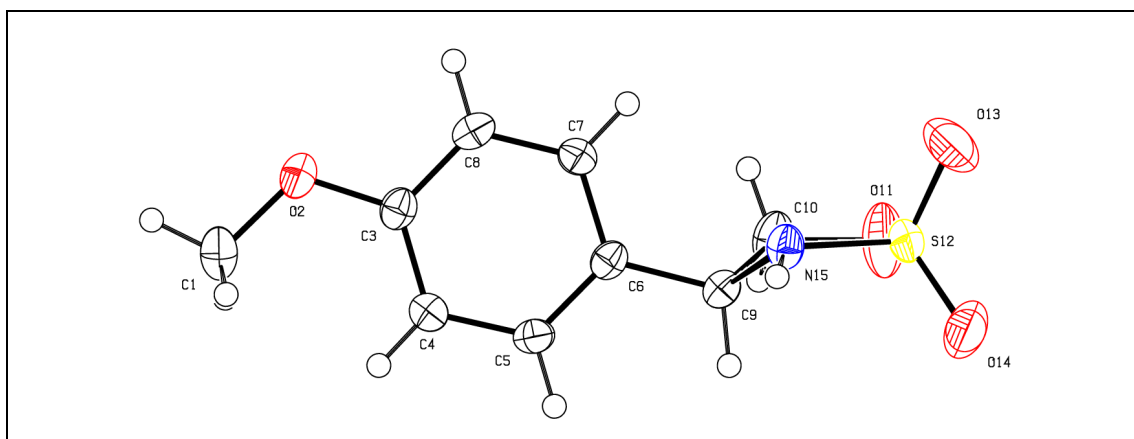

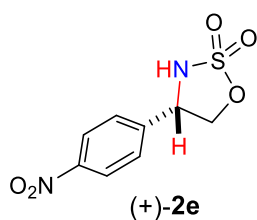

Table 3. Crystal data and structure refinement for **2e**. (CCDC 2097083)

|                                   |                                             |                   |
|-----------------------------------|---------------------------------------------|-------------------|
| Identification code               | C8H8N2O5S                                   |                   |
| Empirical formula                 | C8 H8 N2 O5 S                               |                   |
| Formula weight                    | 244.22                                      |                   |
| Temperature                       | 100(2) K                                    |                   |
| Wavelength                        | 1.54178 Å                                   |                   |
| Crystal system                    | Monoclinic                                  |                   |
| Space group                       | P2 <sub>1</sub>                             |                   |
| Unit cell dimensions              | a = 7.1996(2) Å                             | α = 90°.          |
|                                   | b = 9.8838(3) Å                             | β = 98.7700(10)°. |
|                                   | c = 13.6772(5) Å                            | γ = 90°.          |
| Volume                            | 961.88(5) Å <sup>3</sup>                    |                   |
| Z                                 | 4                                           |                   |
| Density (calculated)              | 1.686 Mg/m <sup>3</sup>                     |                   |
| Absorption coefficient            | 3.144 mm <sup>-1</sup>                      |                   |
| F(000)                            | 504                                         |                   |
| Crystal size                      | 0.320 x 0.240 x 0.200 mm <sup>3</sup>       |                   |
| Theta range for data collection   | 3.269 to 68.271°.                           |                   |
| Index ranges                      | -8<=h<=8, -11<=k<=11, -16<=l<=16            |                   |
| Reflections collected             | 11893                                       |                   |
| Independent reflections           | 3496 [R(int) = 0.0232]                      |                   |
| Completeness to theta = 67.679°   | 99.8 %                                      |                   |
| Absorption correction             | Semi-empirical from equivalents             |                   |
| Max. and min. transmission        | 0.7531 and 0.5919                           |                   |
| Refinement method                 | Full-matrix least-squares on F <sup>2</sup> |                   |
| Data / restraints / parameters    | 3496 / 10 / 323                             |                   |
| Goodness-of-fit on F <sup>2</sup> | 1.055                                       |                   |
| Final R indices [I>2sigma(I)]     | R1 = 0.0351, wR2 = 0.0916                   |                   |
| R indices (all data)              | R1 = 0.0352, wR2 = 0.0917                   |                   |
| Absolute structure parameter      | 0.002(10)                                   |                   |
| Extinction coefficient            | n/a                                         |                   |
| Largest diff. peak and hole       | 0.771 and -0.363 e.Å <sup>-3</sup>          |                   |

73 Y

PLATON-May 11 18:44:34 2018 - (70316)

Z -175 C8H8N2O5S P 21

R = 0.04

NOMOVE FORCED

Prob = 50  
Temp = 100

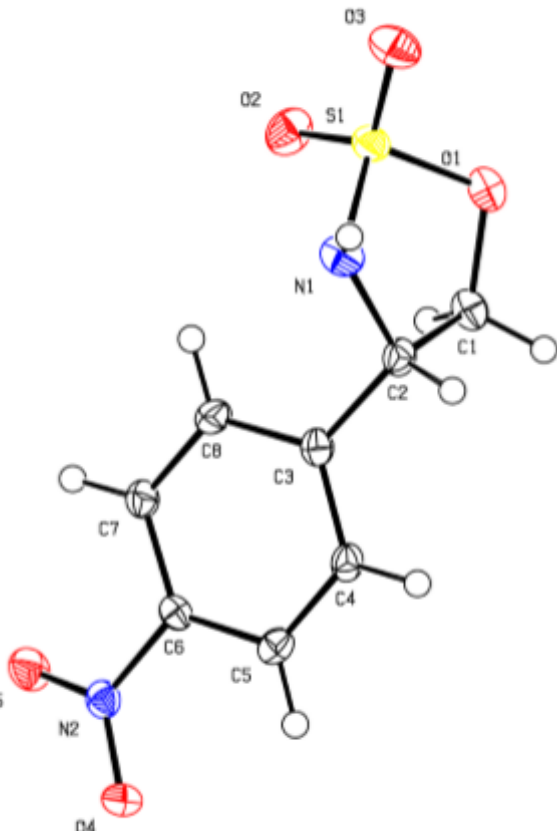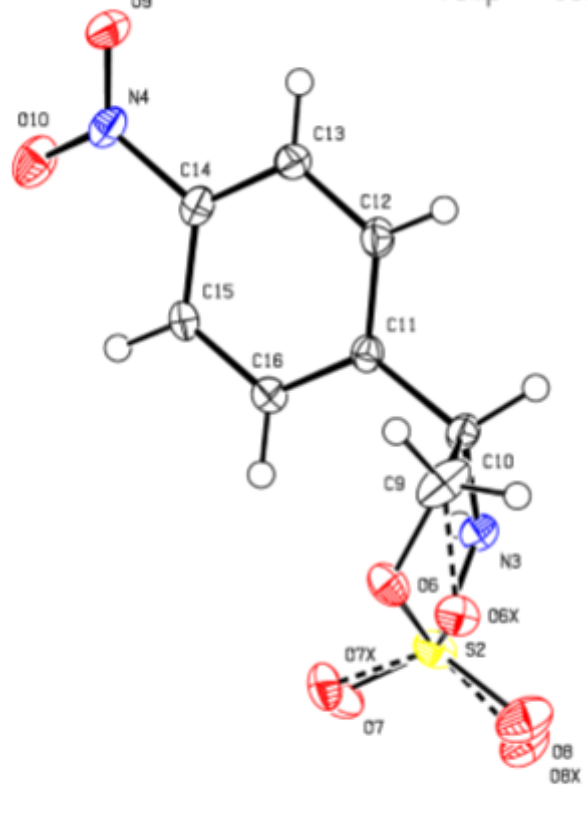

RES= 0 173 X

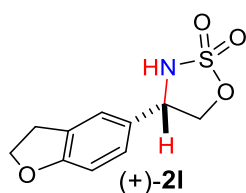

Table 4. Crystal data and structure refinement for **2I**. (CCDC 2097080)

|                                   |                                             |                             |
|-----------------------------------|---------------------------------------------|-----------------------------|
| Identification code               | C10H11NO4S                                  |                             |
| Empirical formula                 | C10 H11 N O4 S                              |                             |
| Formula weight                    | 241.26                                      |                             |
| Temperature                       | 123(2) K                                    |                             |
| Wavelength                        | 1.54178 Å                                   |                             |
| Crystal system                    | Monoclinic                                  |                             |
| Space group                       | P2 <sub>1</sub>                             |                             |
| Unit cell dimensions              | a = 7.6416(7) Å                             | $\alpha = 90^\circ$ .       |
|                                   | b = 6.1950(5) Å                             | $\beta = 91.217(5)^\circ$ . |
|                                   | c = 10.8388(9) Å                            | $\gamma = 90^\circ$ .       |
| Volume                            | 512.99(8) Å <sup>3</sup>                    |                             |
| Z                                 | 2                                           |                             |
| Density (calculated)              | 1.562 Mg/m <sup>3</sup>                     |                             |
| Absorption coefficient            | 2.832 mm <sup>-1</sup>                      |                             |
| F(000)                            | 252                                         |                             |
| Crystal size                      | 0.380 x 0.260 x 0.060 mm <sup>3</sup>       |                             |
| Theta range for data collection   | 4.079 to 66.411°.                           |                             |
| Index ranges                      | -8 ≤ h ≤ 8, -7 ≤ k ≤ 7, -12 ≤ l ≤ 12        |                             |
| Reflections collected             | 5469                                        |                             |
| Independent reflections           | 1777 [R(int) = 0.0503]                      |                             |
| Completeness to theta = 66.411°   | 99.4 %                                      |                             |
| Absorption correction             | Semi-empirical from equivalents             |                             |
| Max. and min. transmission        | 0.7528 and 0.5799                           |                             |
| Refinement method                 | Full-matrix least-squares on F <sup>2</sup> |                             |
| Data / restraints / parameters    | 1777 / 2 / 149                              |                             |
| Goodness-of-fit on F <sup>2</sup> | 1.036                                       |                             |
| Final R indices [I > 2σ(I)]       | R1 = 0.0323, wR2 = 0.0840                   |                             |
| R indices (all data)              | R1 = 0.0328, wR2 = 0.0845                   |                             |
| Absolute structure parameter      | -0.007(16)                                  |                             |
| Extinction coefficient            | n/a                                         |                             |
| Largest diff. peak and hole       | 0.301 and -0.198 e.Å <sup>-3</sup>          |                             |

71 Y

NOMOVE FORCED

Prob = 50  
Temp = 123

PLATON--Apr 9 19:03:17 2019 - (70316)

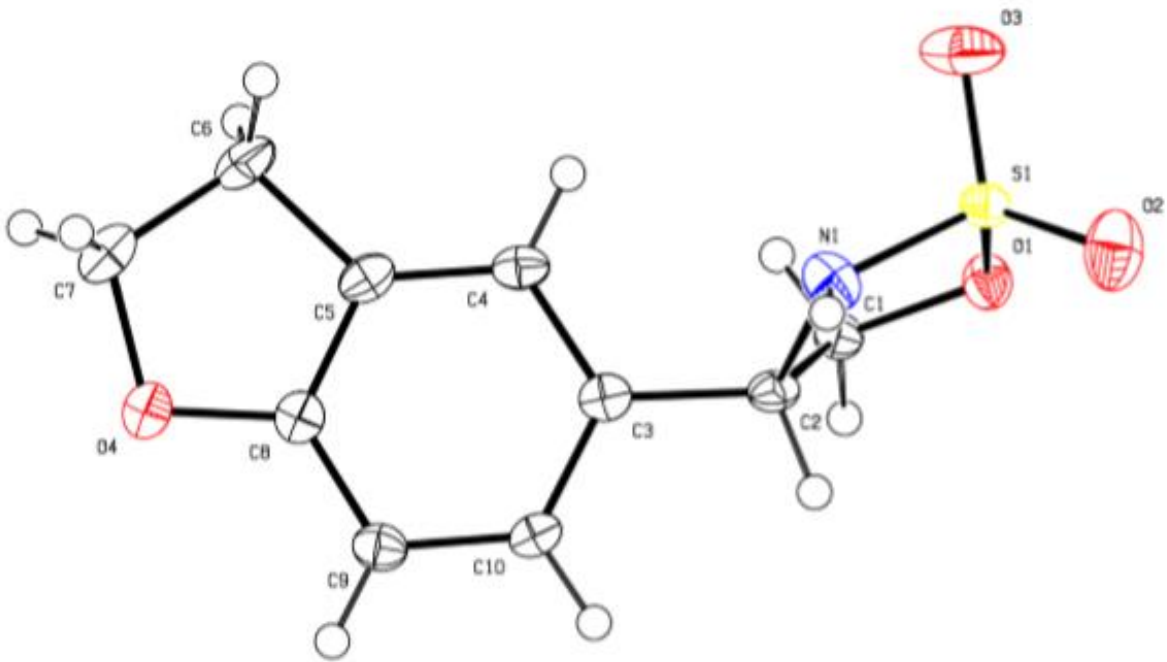

Z 78

C10H11NO4SP 21

R = 0.03

RES= 0 -66 X

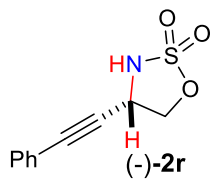

Table 5. Crystal data and structure refinement for **2r**. (CCDC 2097090)

|                                    |                                                  |
|------------------------------------|--------------------------------------------------|
| Identification code                | <b>2r</b>                                        |
| Empirical formula                  | C <sub>10</sub> H <sub>9</sub> NO <sub>3</sub> S |
| Formula weight                     | 223.24                                           |
| Temperature/K                      | 105.0                                            |
| Crystal system                     | orthorhombic                                     |
| Space group                        | P2 <sub>1</sub> 2 <sub>1</sub> 2 <sub>1</sub>    |
| a/Å                                | 5.4916(3)                                        |
| b/Å                                | 7.9553(5)                                        |
| c/Å                                | 23.5357(13)                                      |
| α/°                                | 90                                               |
| β/°                                | 90                                               |
| γ/°                                | 90                                               |
| Volume/Å <sup>3</sup>              | 1028.21(10)                                      |
| Z                                  | 4                                                |
| ρ <sub>calc</sub> /cm <sup>3</sup> | 1.442                                            |
| μ/mm <sup>-1</sup>                 | 2.708                                            |
| F(000)                             | 464.0                                            |
| Crystal size/mm <sup>3</sup>       | 0.21 × 0.15 × 0.03                               |
| Radiation                          | CuKα (λ = 1.54178)                               |

|                                                  |                                                               |
|--------------------------------------------------|---------------------------------------------------------------|
| 2 $\Theta$ range for data collection/ $^{\circ}$ | 7.512 to 138.292                                              |
| Index ranges                                     | $-6 \leq h \leq 6, -9 \leq k \leq 9, -28 \leq l \leq 28$      |
| Reflections collected                            | 12863                                                         |
| Independent reflections                          | 1879 [ $R_{\text{int}} = 0.0378, R_{\text{sigma}} = 0.0238$ ] |
| Data/restraints/parameters                       | 1879/0/140                                                    |
| Goodness-of-fit on $F^2$                         | 1.134                                                         |
| Final R indexes [ $I \geq 2\sigma(I)$ ]          | $R_1 = 0.0287, wR_2 = 0.0724$                                 |
| Final R indexes [all data]                       | $R_1 = 0.0290, wR_2 = 0.0726$                                 |
| Largest diff. peak/hole / $e \text{ \AA}^{-3}$   | 0.43/-0.26                                                    |
| Flack parameter                                  | 0.032(5)                                                      |



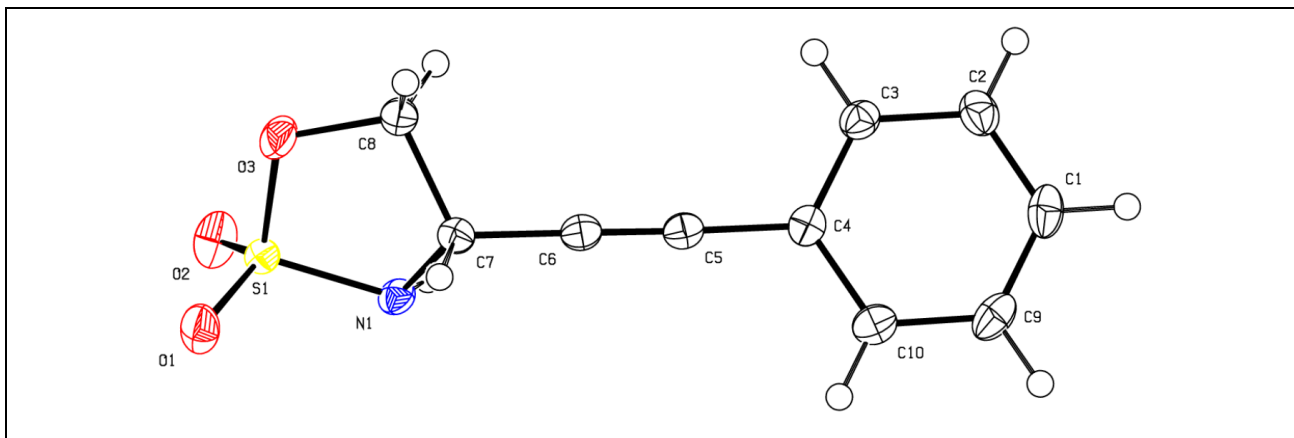

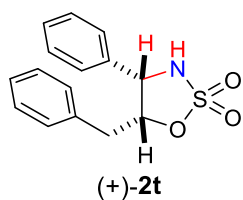

Table 6. Crystal data and structure refinement for **2t**. (CCDC 2097081)

|                                   |                                                    |          |
|-----------------------------------|----------------------------------------------------|----------|
| Identification code               | <b>2t</b>                                          |          |
| Empirical formula                 | C <sub>15</sub> H <sub>15</sub> N O <sub>3</sub> S |          |
| Formula weight                    | 289.34                                             |          |
| Temperature                       | 100(2) K                                           |          |
| Wavelength                        | 1.54178 Å                                          |          |
| Crystal system                    | Orthorhombic                                       |          |
| Space group                       | P2 <sub>1</sub> 2 <sub>1</sub> 2 <sub>1</sub>      |          |
| Unit cell dimensions              | a = 6.1826(3) Å                                    | α = 90°. |
|                                   | b = 8.8713(4) Å                                    | β = 90°. |
|                                   | c = 24.9596(12) Å                                  | γ = 90°. |
| Volume                            | 1368.98(11) Å <sup>3</sup>                         |          |
| Z                                 | 4                                                  |          |
| Density (calculated)              | 1.404 Mg/m <sup>3</sup>                            |          |
| Absorption coefficient            | 2.166 mm <sup>-1</sup>                             |          |
| F(000)                            | 608                                                |          |
| Crystal size                      | 0.480 x 0.140 x 0.080 mm <sup>3</sup>              |          |
| Theta range for data collection   | 3.541 to 66.600°.                                  |          |
| Index ranges                      | -7 ≤ h ≤ 7, -8 ≤ k ≤ 10, -29 ≤ l ≤ 29              |          |
| Reflections collected             | 9270                                               |          |
| Independent reflections           | 2400 [R(int) = 0.0343]                             |          |
| Completeness to theta = 66.600°   | 100.0 %                                            |          |
| Absorption correction             | Semi-empirical from equivalents                    |          |
| Max. and min. transmission        | 0.7528 and 0.5951                                  |          |
| Refinement method                 | Full-matrix least-squares on F <sup>2</sup>        |          |
| Data / restraints / parameters    | 2400 / 1 / 185                                     |          |
| Goodness-of-fit on F <sup>2</sup> | 1.086                                              |          |
| Final R indices [I > 2σ(I)]       | R <sub>1</sub> = 0.0267, wR <sub>2</sub> = 0.0711  |          |
| R indices (all data)              | R <sub>1</sub> = 0.0272, wR <sub>2</sub> = 0.0714  |          |
| Absolute structure parameter      | 0.040(6)                                           |          |
| Extinction coefficient            | n/a                                                |          |
| Largest diff. peak and hole       | 0.316 and -0.307 e.Å <sup>-3</sup>                 |          |

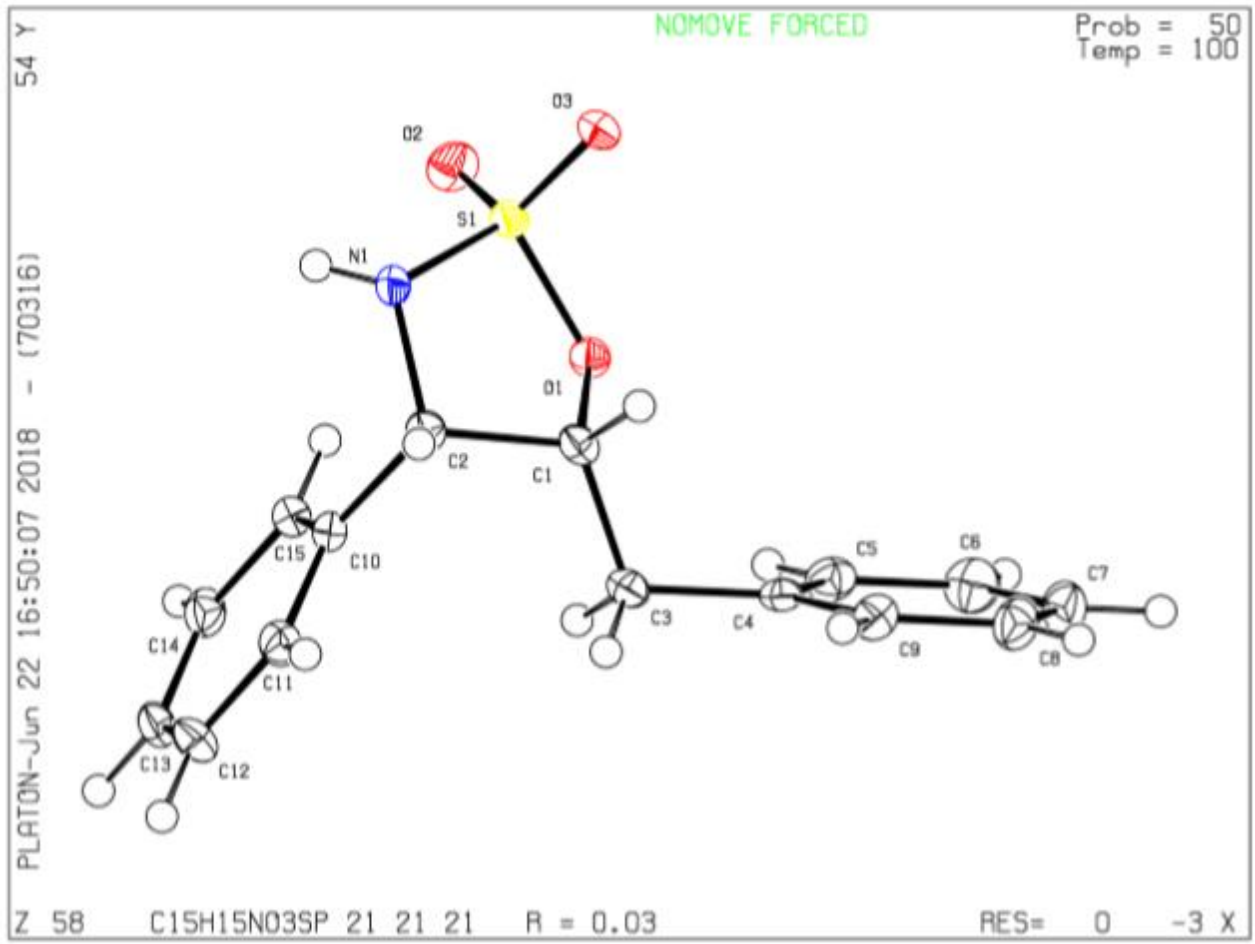

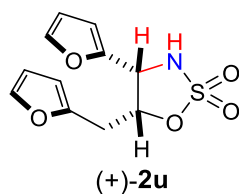

Table 7. Crystal data and structure refinement for **2u**. (CCDC 2097089)

| Identification code               | <b>2u</b>                                          |                  |
|-----------------------------------|----------------------------------------------------|------------------|
| Empirical formula                 | C <sub>11</sub> H <sub>11</sub> N O <sub>5</sub> S |                  |
| Formula weight                    | 269.27                                             |                  |
| Temperature                       | 123(2) K                                           |                  |
| Wavelength                        | 1.54178 Å                                          |                  |
| Crystal system                    | Monoclinic                                         |                  |
| Space group                       | C2                                                 |                  |
| Unit cell dimensions              | a = 17.9291(12) Å                                  | α = 90°.         |
|                                   | b = 5.4403(4) Å                                    | β = 124.469(3)°. |
|                                   | c = 14.8271(9) Å                                   | γ = 90°.         |
| Volume                            | 1192.32(14) Å <sup>3</sup>                         |                  |
| Z                                 | 4                                                  |                  |
| Density (calculated)              | 1.500 Mg/m <sup>3</sup>                            |                  |
| Absorption coefficient            | 2.569 mm <sup>-1</sup>                             |                  |
| F(000)                            | 560                                                |                  |
| Crystal size                      | 0.480 x 0.120 x 0.100 mm <sup>3</sup>              |                  |
| Theta range for data collection   | 3.616 to 66.693°.                                  |                  |
| Index ranges                      | -21 ≤ h ≤ 17, -6 ≤ k ≤ 6, -17 ≤ l ≤ 17             |                  |
| Reflections collected             | 4718                                               |                  |
| Independent reflections           | 2078 [R(int) = 0.0276]                             |                  |
| Completeness to theta = 66.693°   | 99.3 %                                             |                  |
| Absorption correction             | Semi-empirical from equivalents                    |                  |
| Max. and min. transmission        | 0.7528 and 0.5510                                  |                  |
| Refinement method                 | Full-matrix least-squares on F <sup>2</sup>        |                  |
| Data / restraints / parameters    | 2078 / 2 / 166                                     |                  |
| Goodness-of-fit on F <sup>2</sup> | 1.105                                              |                  |
| Final R indices [I > 2σ(I)]       | R <sub>1</sub> = 0.0377, wR <sub>2</sub> = 0.1042  |                  |
| R indices (all data)              | R <sub>1</sub> = 0.0380, wR <sub>2</sub> = 0.1046  |                  |
| Absolute structure parameter      | -0.010(15)                                         |                  |
| Extinction coefficient            | n/a                                                |                  |
| Largest diff. peak and hole       | 0.304 and -0.246 e.Å <sup>-3</sup>                 |                  |

PLATON version of 18/02/2019; check.def file version of 18/02/2019

Datablock C11H11NO5S - ellipsoid plot

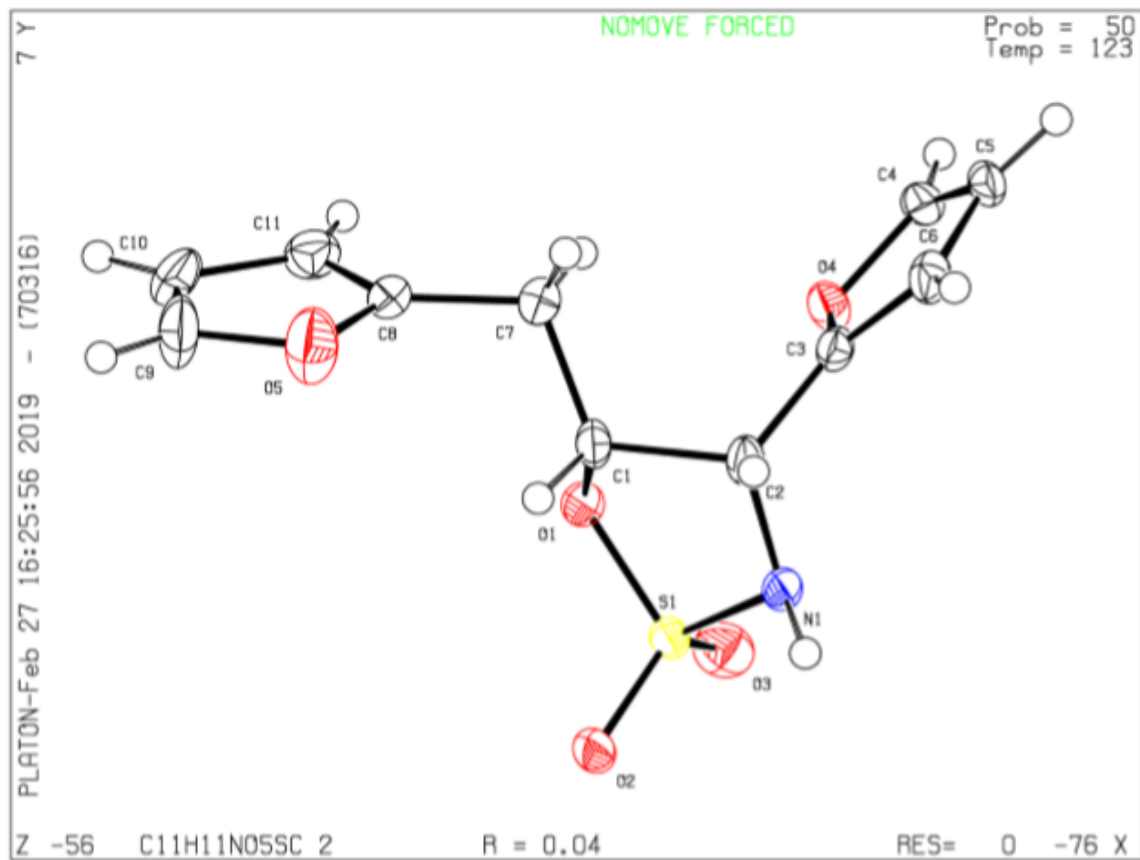

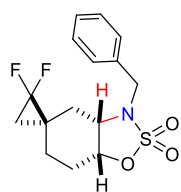

(+)-*N*-Bn-2ad

Table 8. Crystal data and structure refinement for *N*-Bn-2ad. (CCDC 2097088)

|                                   |                                               |          |
|-----------------------------------|-----------------------------------------------|----------|
| Identification code               | C15H17F2NO3S                                  |          |
| Empirical formula                 | C15 H17 F2 N O3 S                             |          |
| Formula weight                    | 329.35                                        |          |
| Temperature                       | 173(2) K                                      |          |
| Wavelength                        | 1.54178 Å                                     |          |
| Crystal system                    | Orthorhombic                                  |          |
| Space group                       | P2 <sub>1</sub> 2 <sub>1</sub> 2 <sub>1</sub> |          |
| Unit cell dimensions              | a = 10.0047(7) Å                              | α = 90°. |
|                                   | b = 10.8944(7) Å                              | β = 90°. |
|                                   | c = 13.8830(9) Å                              | γ = 90°. |
| Volume                            | 1513.18(17) Å <sup>3</sup>                    |          |
| Z                                 | 4                                             |          |
| Density (calculated)              | 1.446 Mg/m <sup>3</sup>                       |          |
| Absorption coefficient            | 2.223 mm <sup>-1</sup>                        |          |
| F(000)                            | 688                                           |          |
| Crystal size                      | 0.420 x 0.220 x 0.120 mm <sup>3</sup>         |          |
| Theta range for data collection   | 5.161 to 66.631°.                             |          |
| Index ranges                      | -11 ≤ h ≤ 11, -12 ≤ k ≤ 12, -16 ≤ l ≤ 16      |          |
| Reflections collected             | 28574                                         |          |
| Independent reflections           | 2622 [R(int) = 0.0253]                        |          |
| Completeness to theta = 66.631°   | 98.5 %                                        |          |
| Absorption correction             | Semi-empirical from equivalents               |          |
| Max. and min. transmission        | 0.7528 and 0.6183                             |          |
| Refinement method                 | Full-matrix least-squares on F <sup>2</sup>   |          |
| Data / restraints / parameters    | 2622 / 0 / 200                                |          |
| Goodness-of-fit on F <sup>2</sup> | 1.038                                         |          |
| Final R indices [I > 2σ(I)]       | R1 = 0.0228, wR2 = 0.0683                     |          |
| R indices (all data)              | R1 = 0.0230, wR2 = 0.0686                     |          |
| Absolute structure parameter      | 0.019(18)                                     |          |
| Extinction coefficient            | n/a                                           |          |
| Largest diff. peak and hole       | 0.161 and -0.210 e.Å <sup>-3</sup>            |          |

65 Y

PLATON-Aug 10 14:18:24 2020 - (70316)

Z -140 C15H17F2NOP 21 21 21 R = 0.02

NOMOVE FORCED

Prob = 50  
Temp = 173

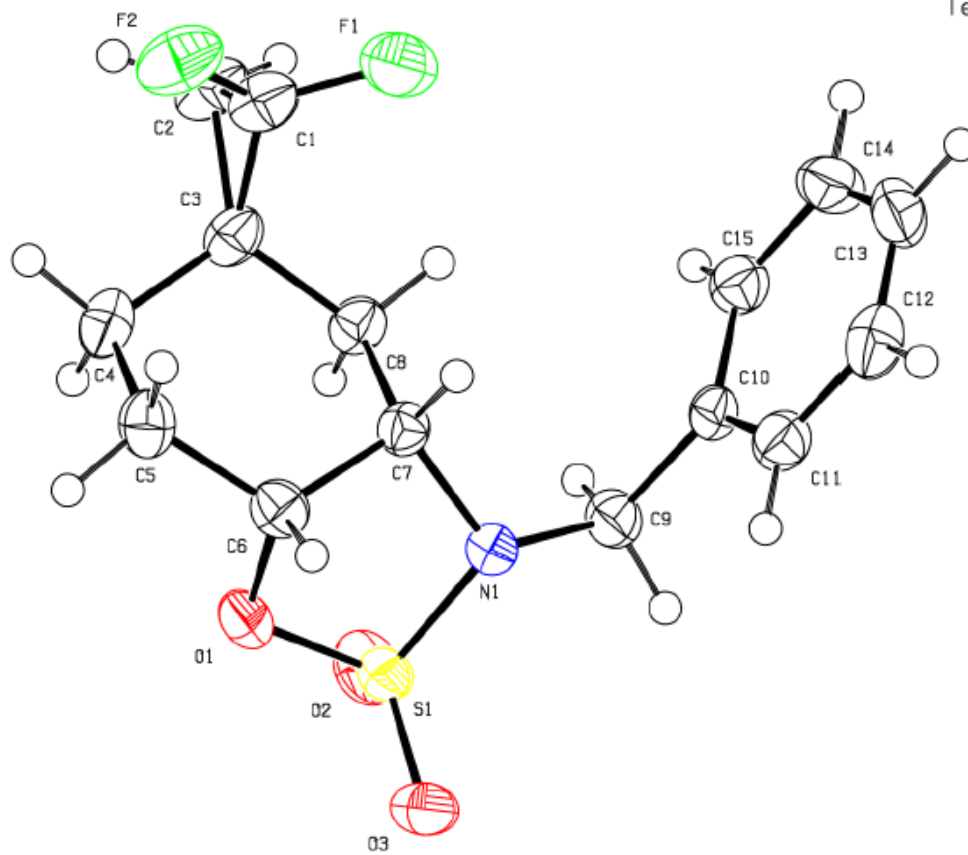

RES= 0 -123 X

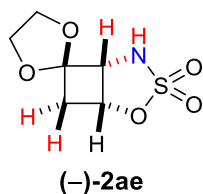

Table 9. Crystal data and structure refinement for **2ae**. (CCDC 2097082)

|                                   |                                                  |          |
|-----------------------------------|--------------------------------------------------|----------|
| Identification code               | <b>2ae</b>                                       |          |
| Empirical formula                 | C <sub>6</sub> H <sub>9</sub> N O <sub>5</sub> S |          |
| Formula weight                    | 207.20                                           |          |
| Temperature                       | 100(2) K                                         |          |
| Wavelength                        | 1.54178 Å                                        |          |
| Crystal system                    | Orthorhombic                                     |          |
| Space group                       | P2 <sub>1</sub> 2 <sub>1</sub> 2 <sub>1</sub>    |          |
| Unit cell dimensions              | a = 5.2382(3) Å                                  | α = 90°. |
|                                   | b = 10.1883(6) Å                                 | β = 90°. |
|                                   | c = 15.0152(9) Å                                 | γ = 90°. |
| Volume                            | 801.34(8) Å <sup>3</sup>                         |          |
| Z                                 | 4                                                |          |
| Density (calculated)              | 1.717 Mg/m <sup>3</sup>                          |          |
| Absorption coefficient            | 3.598 mm <sup>-1</sup>                           |          |
| F(000)                            | 432                                              |          |
| Crystal size                      | 0.380 x 0.100 x 0.080 mm <sup>3</sup>            |          |
| Theta range for data collection   | 5.246 to 66.836°.                                |          |
| Index ranges                      | -6 ≤ h ≤ 6, -12 ≤ k ≤ 11, -17 ≤ l ≤ 17           |          |
| Reflections collected             | 8547                                             |          |
| Independent reflections           | 1418 [R(int) = 0.0653]                           |          |
| Completeness to theta = 66.836°   | 99.7 %                                           |          |
| Absorption correction             | Semi-empirical from equivalents                  |          |
| Max. and min. transmission        | 0.7528 and 0.5720                                |          |
| Refinement method                 | Full-matrix least-squares on F <sup>2</sup>      |          |
| Data / restraints / parameters    | 1418 / 1 / 121                                   |          |
| Goodness-of-fit on F <sup>2</sup> | 1.085                                            |          |
| Final R indices [I > 2σ(I)]       | R1 = 0.0315, wR2 = 0.0830                        |          |
| R indices (all data)              | R1 = 0.0318, wR2 = 0.0833                        |          |
| Absolute structure parameter      | 0.005(8)                                         |          |
| Extinction coefficient            | n/a                                              |          |
| Largest diff. peak and hole       | 0.455 and -0.300 e.Å <sup>-3</sup>               |          |



82 Y

NOMOVE FORCED

Prob = 50  
Temp = 100

PLATON-Jul 16 15:48:23 2018 - (70316)

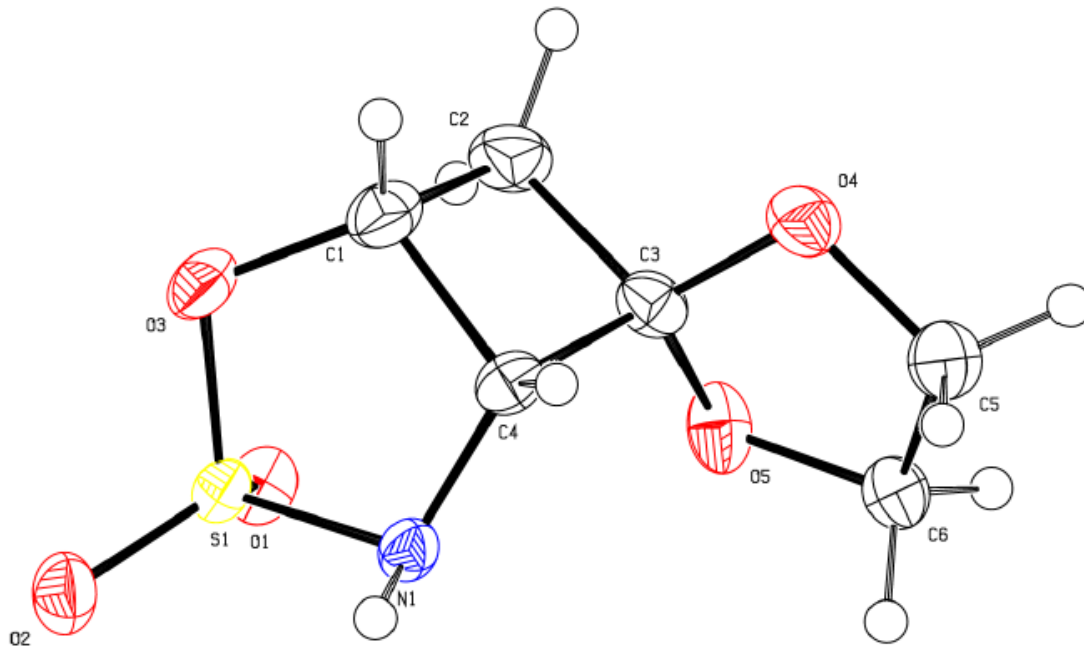

Z -76 C6H9NO5S P 21 21 21 R = 0.03

RES= 0 121 X

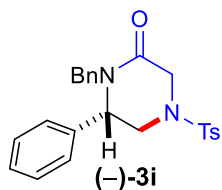

Table 10. Crystal data and structure refinement for **3i**. (CCDC 2097087)

|                                   |                                             |                 |
|-----------------------------------|---------------------------------------------|-----------------|
| Identification code               | C24H24N2O3S                                 |                 |
| Empirical formula                 | C24 H24 N2 O3 S                             |                 |
| Formula weight                    | 420.51                                      |                 |
| Temperature                       | 173(2) K                                    |                 |
| Wavelength                        | 1.54178 Å                                   |                 |
| Crystal system                    | Monoclinic                                  |                 |
| Space group                       | P2 <sub>1</sub>                             |                 |
| Unit cell dimensions              | a = 9.0355(12) Å                            | α = 90°.        |
|                                   | b = 10.0246(14) Å                           | β = 97.020(4)°. |
|                                   | c = 11.7191(16) Å                           | γ = 90°.        |
| Volume                            | 1053.5(2) Å <sup>3</sup>                    |                 |
| Z                                 | 2                                           |                 |
| Density (calculated)              | 1.326 Mg/m <sup>3</sup>                     |                 |
| Absorption coefficient            | 1.595 mm <sup>-1</sup>                      |                 |
| F(000)                            | 444                                         |                 |
| Crystal size                      | 0.380 x 0.240 x 0.150 mm <sup>3</sup>       |                 |
| Theta range for data collection   | 4.931 to 66.661°.                           |                 |
| Index ranges                      | -10 ≤ h ≤ 10, -11 ≤ k ≤ 11, -13 ≤ l ≤ 13    |                 |
| Reflections collected             | 18180                                       |                 |
| Independent reflections           | 3597 [R(int) = 0.0230]                      |                 |
| Completeness to theta = 66.661°   | 97.5 %                                      |                 |
| Absorption correction             | Semi-empirical from equivalents             |                 |
| Max. and min. transmission        | 0.7528 and 0.6187                           |                 |
| Refinement method                 | Full-matrix least-squares on F <sup>2</sup> |                 |
| Data / restraints / parameters    | 3597 / 1 / 273                              |                 |
| Goodness-of-fit on F <sup>2</sup> | 1.067                                       |                 |
| Final R indices [I > 2σ(I)]       | R1 = 0.0228, wR2 = 0.0653                   |                 |
| R indices (all data)              | R1 = 0.0228, wR2 = 0.0654                   |                 |
| Absolute structure parameter      | -0.004(4)                                   |                 |
| Extinction coefficient            | 0.010(3)                                    |                 |
| Largest diff. peak and hole       | 0.145 and -0.163 e.Å <sup>-3</sup>          |                 |

-34 Y

PLATON-Jul 14 20:10:05 2020 - (70316)

Z 144

C<sub>24</sub>H<sub>24</sub>N<sub>2</sub>O<sub>3</sub>P 21

R = 0.02

RES= 0 -113 X

NOMOVE FORCED

Prob = 50  
Temp = 173

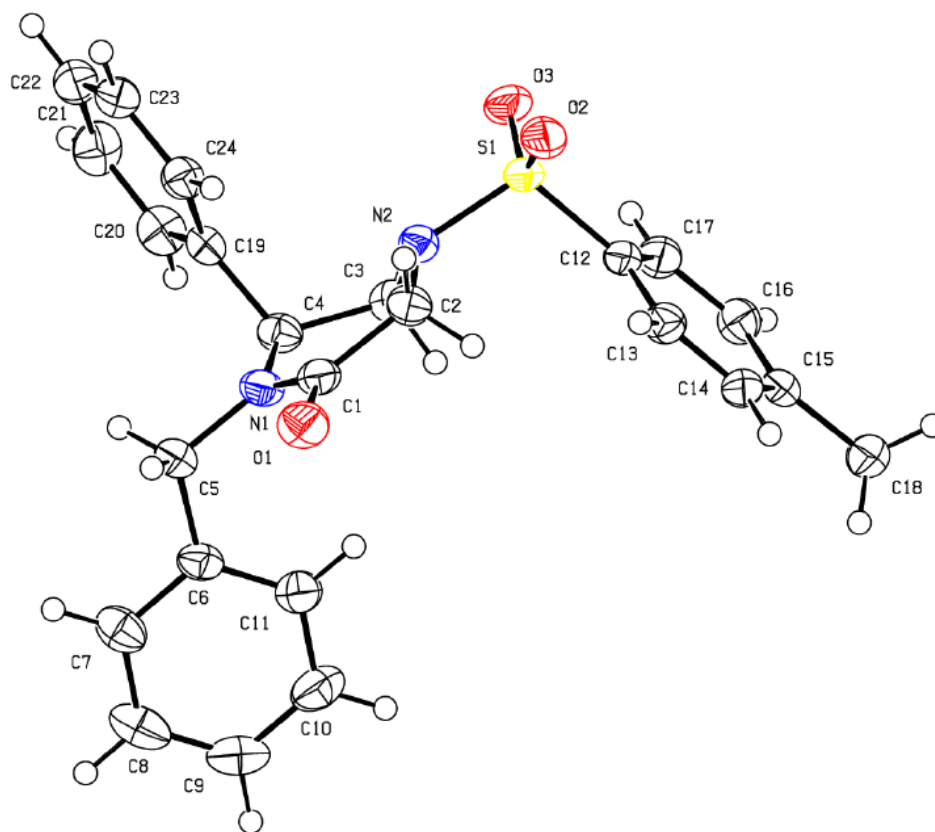

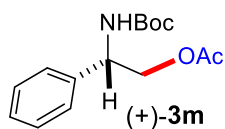

Table 11. Crystal data and structure refinement for **3m**. (CCDC 2097085)

|                                   |                                                   |          |
|-----------------------------------|---------------------------------------------------|----------|
| Identification code               | <b>3m</b>                                         |          |
| Empirical formula                 | C <sub>15</sub> H <sub>21</sub> N O <sub>4</sub>  |          |
| Formula weight                    | 279.33                                            |          |
| Temperature                       | 100(2) K                                          |          |
| Wavelength                        | 1.54178 Å                                         |          |
| Crystal system                    | Orthorhombic                                      |          |
| Space group                       | P2 <sub>1</sub> 2 <sub>1</sub> 2 <sub>1</sub>     |          |
| Unit cell dimensions              | a = 5.2404(2) Å                                   | α = 90°. |
|                                   | b = 10.6394(4) Å                                  | β = 90°. |
|                                   | c = 27.3903(10) Å                                 | γ = 90°. |
| Volume                            | 1527.14(10) Å <sup>3</sup>                        |          |
| Z                                 | 4                                                 |          |
| Density (calculated)              | 1.215 Mg/m <sup>3</sup>                           |          |
| Absorption coefficient            | 0.721 mm <sup>-1</sup>                            |          |
| F(000)                            | 600                                               |          |
| Crystal size                      | 0.480 x 0.090 x 0.080 mm <sup>3</sup>             |          |
| Theta range for data collection   | 3.227 to 66.566°.                                 |          |
| Index ranges                      | -6 ≤ h ≤ 6, -12 ≤ k ≤ 12, -24 ≤ l ≤ 32            |          |
| Reflections collected             | 11554                                             |          |
| Independent reflections           | 2682 [R(int) = 0.0316]                            |          |
| Completeness to theta = 66.566°   | 99.8 %                                            |          |
| Absorption correction             | Semi-empirical from equivalents                   |          |
| Max. and min. transmission        | 0.7528 and 0.6603                                 |          |
| Refinement method                 | Full-matrix least-squares on F <sup>2</sup>       |          |
| Data / restraints / parameters    | 2682 / 1 / 188                                    |          |
| Goodness-of-fit on F <sup>2</sup> | 1.051                                             |          |
| Final R indices [I > 2σ(I)]       | R <sub>1</sub> = 0.0289, wR <sub>2</sub> = 0.0721 |          |
| R indices (all data)              | R <sub>1</sub> = 0.0296, wR <sub>2</sub> = 0.0726 |          |
| Absolute structure parameter      | 0.06(6)                                           |          |
| Extinction coefficient            | n/a                                               |          |
| Largest diff. peak and hole       | 0.182 and -0.199 e.Å <sup>-3</sup>                |          |

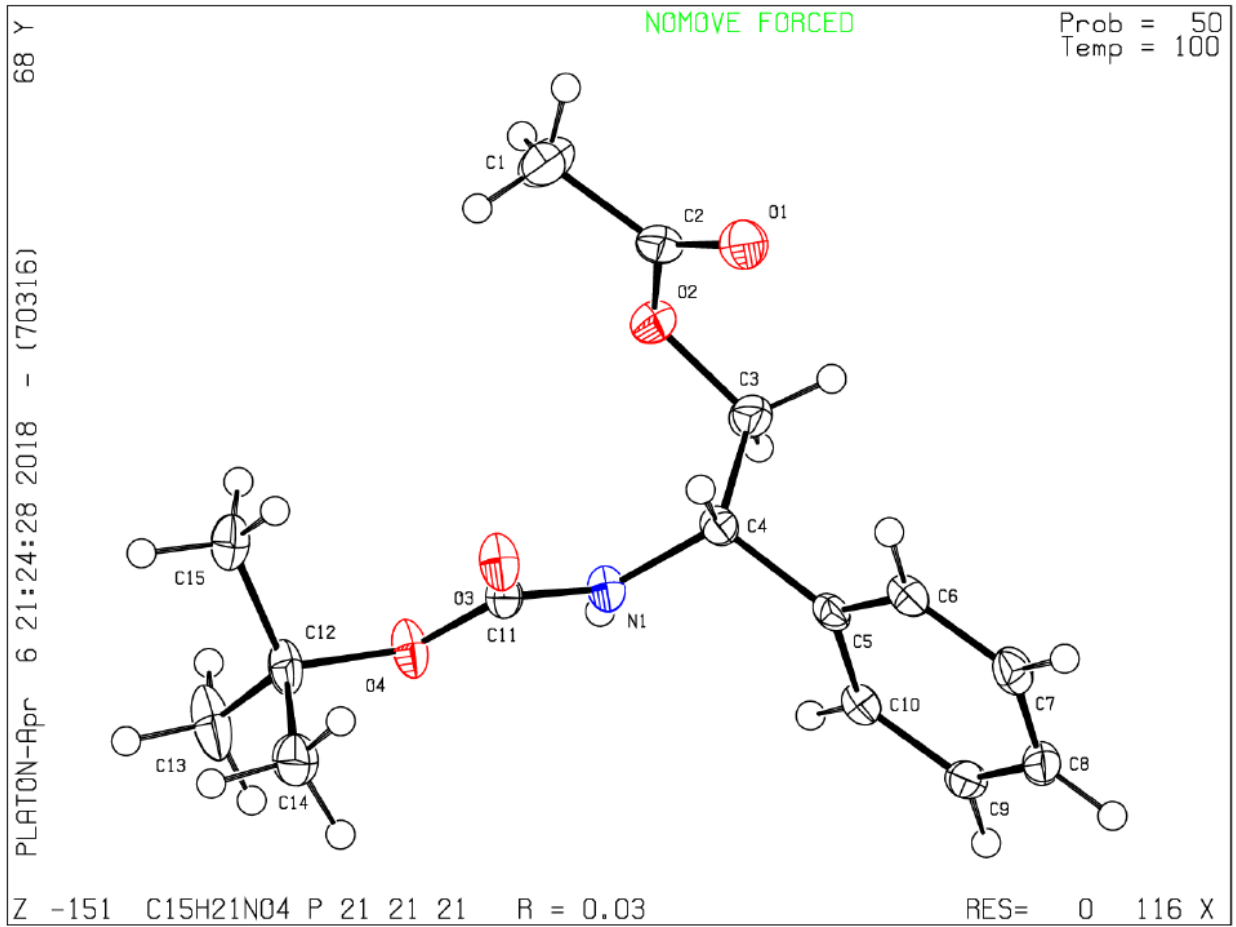

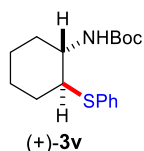

Table 12. Crystal data and structure refinement for **3v**. (CCDC 2097086)

|                                   |                                                    |                  |
|-----------------------------------|----------------------------------------------------|------------------|
| Identification code               | <b>3v</b>                                          |                  |
| Empirical formula                 | C <sub>17</sub> H <sub>25</sub> N O <sub>2</sub> S |                  |
| Formula weight                    | 307.44                                             |                  |
| Temperature                       | 100(2) K                                           |                  |
| Wavelength                        | 1.54178 Å                                          |                  |
| Crystal system                    | Triclinic                                          |                  |
| Space group                       | P1                                                 |                  |
| Unit cell dimensions              | a = 5.1618(4) Å                                    | α = 112.852(4)°. |
|                                   | b = 8.6542(7) Å                                    | β = 96.462(4)°.  |
|                                   | c = 10.5664(8) Å                                   | γ = 99.605(4)°.  |
| Volume                            | 420.62(6) Å <sup>3</sup>                           |                  |
| Z                                 | 1                                                  |                  |
| Density (calculated)              | 1.214 Mg/m <sup>3</sup>                            |                  |
| Absorption coefficient            | 1.735 mm <sup>-1</sup>                             |                  |
| F(000)                            | 166                                                |                  |
| Crystal size                      | 0.550 x 0.340 x 0.220 mm <sup>3</sup>              |                  |
| Theta range for data collection   | 5.657 to 69.773°.                                  |                  |
| Index ranges                      | -6 ≤ h ≤ 6, -10 ≤ k ≤ 10, -12 ≤ l ≤ 12             |                  |
| Reflections collected             | 6021                                               |                  |
| Independent reflections           | 2898 [R(int) = 0.0304]                             |                  |
| Completeness to theta = 67.679°   | 98.6 %                                             |                  |
| Absorption correction             | Semi-empirical from equivalents                    |                  |
| Max. and min. transmission        | 0.7533 and 0.6045                                  |                  |
| Refinement method                 | Full-matrix least-squares on F <sup>2</sup>        |                  |
| Data / restraints / parameters    | 2898 / 4 / 196                                     |                  |
| Goodness-of-fit on F <sup>2</sup> | 1.068                                              |                  |
| Final R indices [I > 2σ(I)]       | R1 = 0.0412, wR2 = 0.1111                          |                  |
| R indices (all data)              | R1 = 0.0416, wR2 = 0.1115                          |                  |
| Absolute structure parameter      | -0.03(2)                                           |                  |
| Extinction coefficient            | n/a                                                |                  |
| Largest diff. peak and hole       | 0.314 and -0.222 e.Å <sup>-3</sup>                 |                  |

PLATON version of 23/04/2018; check.def file version of 23/04/2018

Datablock: C17H25NO2S - ellipsoid plot

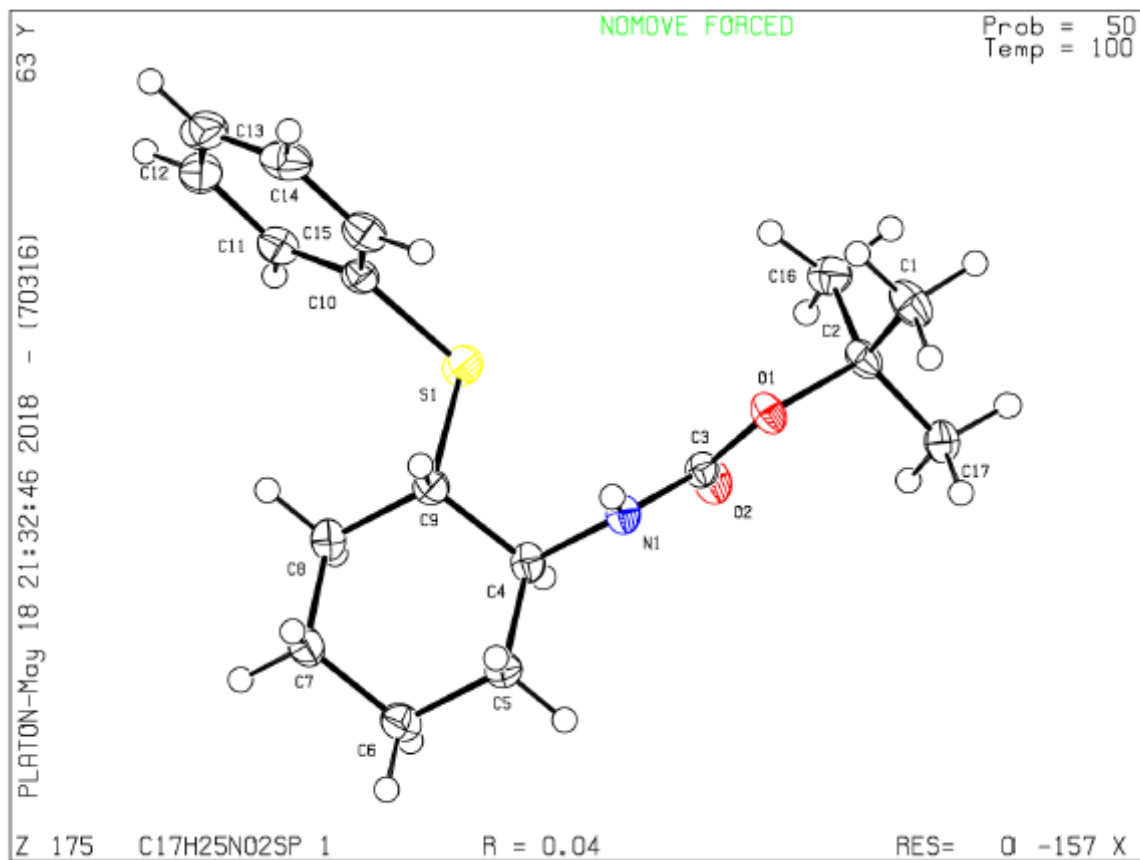

## 7. References

1. H. C. Kolb, M. G. Finn, K. B. Sharpless, Click chemistry: diverse chemical function from a few good reactions. *Angew. Chem. Int. Ed.* **40**, 2004–2021 (2001).
2. S. Bräse, C. Gil, K. Knepper, V. Zimmermann, Organic azides: an exploding diversity of a unique class of compounds. *Angew. Chem. Int. Ed.* **44**, 5188–5240 (2005).
3. K. Lang, S. Torker, L. Wojtas, X. P. Zhang, Asymmetric induction and enantiodivergence in catalytic radical C–H amination via enantiodifferentiative H-atom abstraction and stereoretentive radical substitution. *J. Am. Chem. Soc.* **141**, 12388–12396 (2019).
4. Y. Hu, K. Lang, C. Li, J. B. Gill, I. Kim, H. Lu, K. B. Fields, M. Marshall, Q. Cheng, X. Cui, L. Wojtas, X. P. Zhang, Enantioselective radical construction of 5-membered cyclic sulfonamides by metalloradical C–H amination. *J. Am. Chem. Soc.* **141**, 18160–18169 (2019).
5. Cavender, C. J. & Shiner, V. J. Trifluoromethanesulfonyl azide. Its reaction with alkyl amines to form alkyl azides. *J. Org. Chem.* **37**, 3567–3569 (1972).
6. Meng, G.; Guo, T.; Ma, T.; Zhang, J.; Shen, Y.; Sharpless, K. B.; Dong, J. Modular click chemistry libraries for functional screens using a diazotizing reagent. *Nature* **574**, 86–89 (2019).
7. M. W. Giese, W. H. Moser, Stereoselective synthesis of the rocaglamide skeleton via a silyl vinylketene formation/[4 + 1] annulation sequence. *Org. Lett.* **10**, 4215–4218 (2008).
8. A. J. Wommack, J. S. Kingsbury, Synthesis of acyclic ketones by catalytic, bidirectional homologation of formaldehyde with nonstabilized diazoalkanes. application of a chiral diazomethyl(pyrrolidine) in total syntheses of erythroxylo alkaloids. *J. Org. Chem.* **78**, 10573–10587 (2013).
9. E. Hartmann, M. Oestreich, Two-directional desymmetrization by double 1,4-addition of silicon and boron nucleophiles. *Org. Lett.* **14**, 2406–2409 (2012).
10. R. M. Bychek, V. V. Levterov, I. V. Sadkova, A. A. Tolmachev, P. K. Mykhailiuk, Synthesis of functionalized difluorocyclopropanes: unique building blocks for drug discovery. *Chem. Eur. J.* **24**, 12291–12297 (2018).
11. Z. Wan, M. L. Vazquez, X. Li, Benzamides of pyrazolyl-amino-pyrimidinyl derivatives, and compositions and methods thereof. WO2020119819A1, 2020.
12. M. N. Alberti, G. Vassilikogiannakis, M. Orfanopoulos, Stereochemistry of the singlet oxygenation of simple alkenes: a stereospecific transformation. *Org. Lett.* **10**, 3997–4000 (2008).
13. Y.-Q. Wang, C.-B. Yu, D.-W. Wang, X.-B. Wang, Y.-G. Zhou, Enantioselective synthesis of cyclic sulfamidates via Pd-catalyzed hydrogenation. *Org. Lett.* **10**, 2071–2074 (2008).
14. T. Kaseda, T. Kikuchi, C. Kibayashi, Enantioselective total synthesis of (+)-(*S*)-dihydroperiphylline. *Tetrahedron Lett.* **30**, 4539–4542 (1989).
15. M. Duan, W. M. Kazmierski, M. Tallant, J. H. Jun, M. Edelstein, R. Ferris, D. Todd, P. Wheelan, Z. Xiong, Discovery of a novel series of cyclic urea as potent CCR5 antagonists. *Bioorganic Med. Chem. Lett.* **21**, 6381–6385 (2011).
16. S. Mizuta, N. Shibata, Y. Goto, T. Furukawa, S. Nakamura, T. Toru, Cinchona alkaloid-catalyzed enantioselective monofluoromethylation reaction based on fluorobis(phenylsulfonyl)methane chemistry combined with a Mannich-type reaction. *J. Am. Chem. Soc.* **129**, 6394–6395 (2007).
17. H. Xiao, Z. Chai, C.-W. Zheng, Y.-Q. Yang, W. Liu, J.-K. Zhang, G. Zhao, Asymmetric [3+2] cycloadditions of allenolates and dual activated olefins catalyzed by simple bifunctional *N*-acyl aminophosphines. *Angew. Chem. Int. Ed.* **49**, 4467–4470 (2010).
18. N. Pendem, C. Douat, P. Claudon, M. Laguerre, S. Castano, B. Desbat, D. Cavagnat, E. Ennifar, B. Kauffmann, G. Guichard, Helix-forming propensity of aliphatic urea oligomers incorporating noncanonical residue substitution patterns. *J. Am. Chem. Soc.* **135**, 4884–4892 (2013).
19. X.-L. Hou, R.-H. Fan, L.-X. Dai, Tributylphosphine: a remarkable promoting reagent for the ring-opening reaction of aziridines. *J. Org. Chem.* **67**, 5295–5300 (2002).
20. P. O'Brien, C. M. Rosser, D. Caine, On the  $\alpha$ -lithiation-rearrangement of *N*-toluensulfonyl aziridines: mechanistic and synthetic aspects. *Tetrahedron* **59**, 9779–9791 (2003).



CHCl<sub>3</sub>

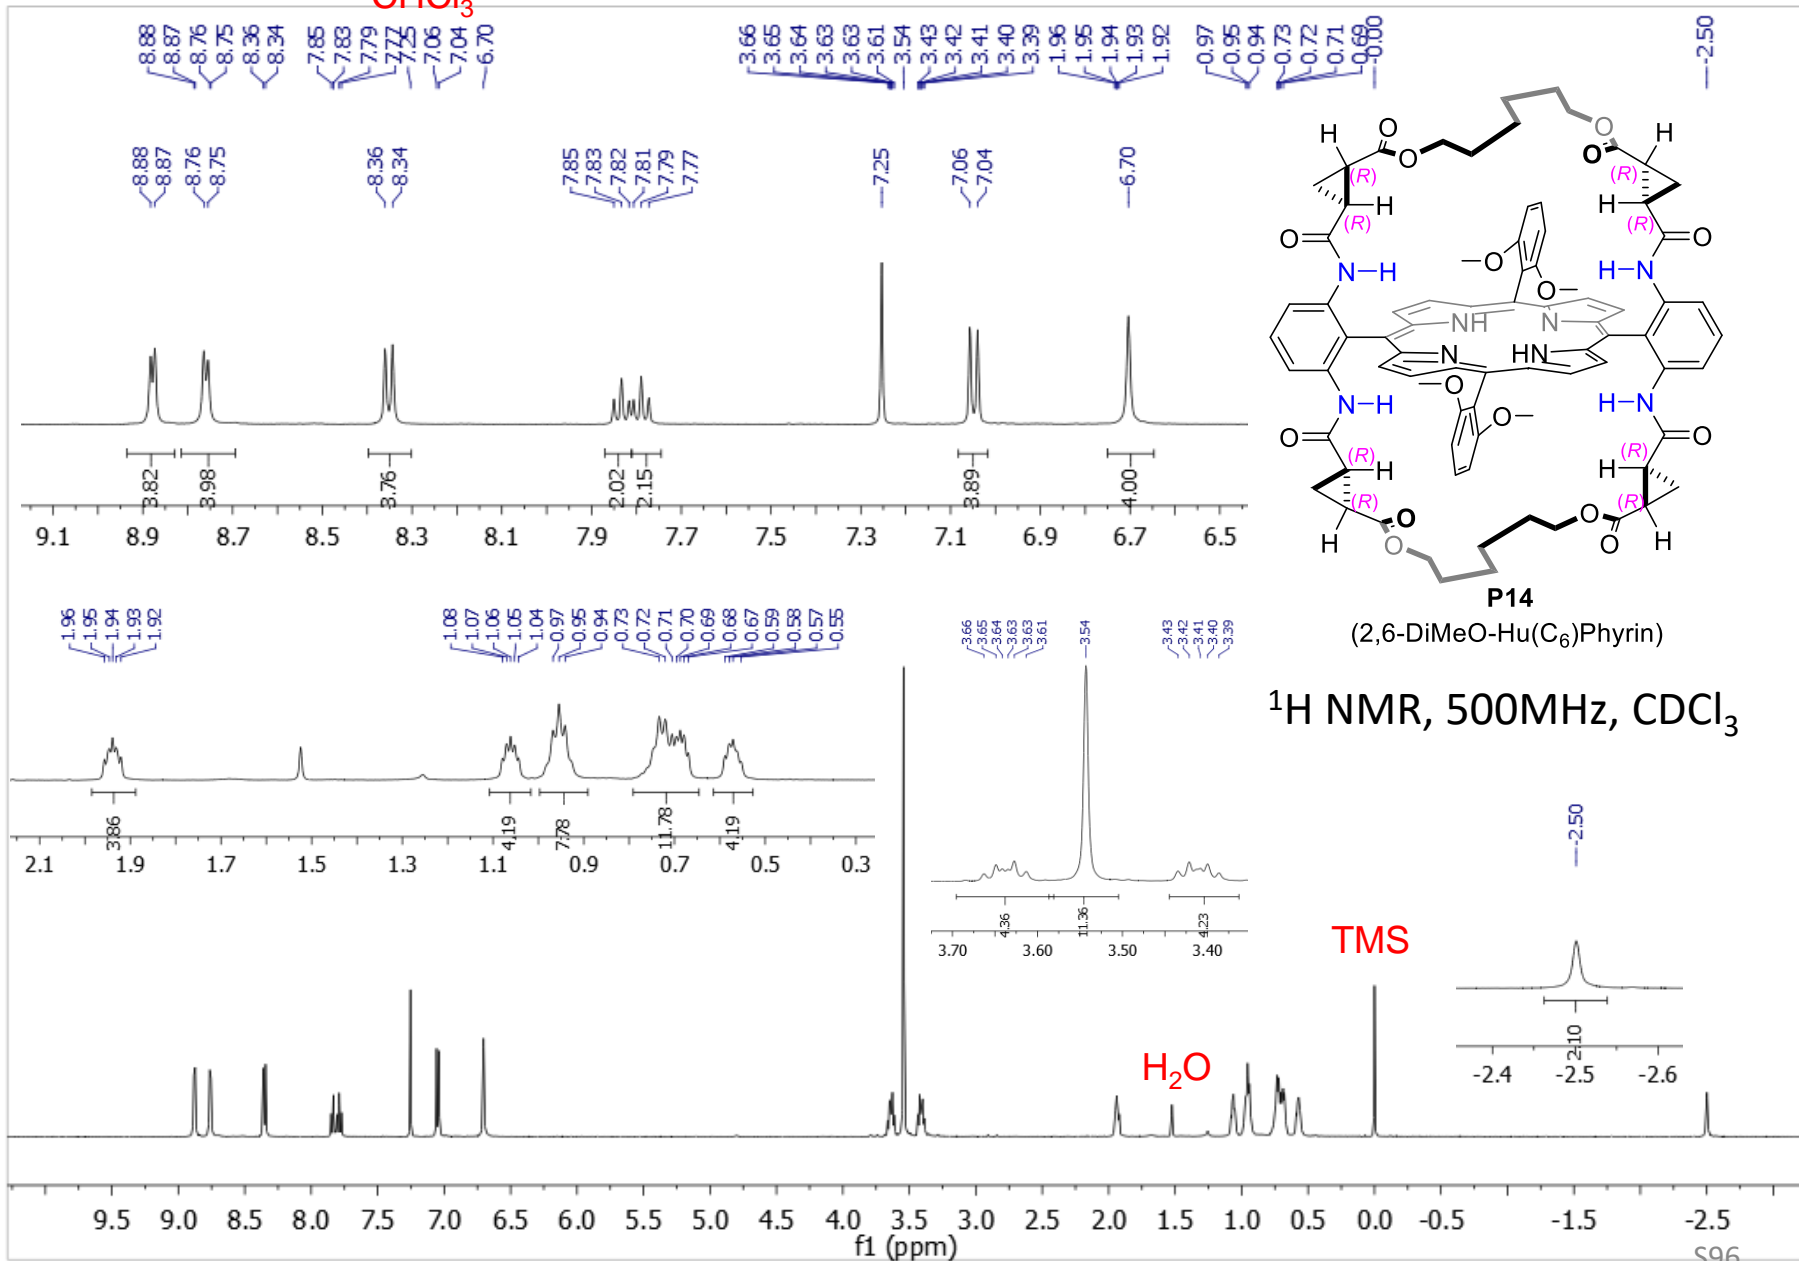

$^{13}\text{C}$  NMR, 100MHz,  $\text{CDCl}_3$

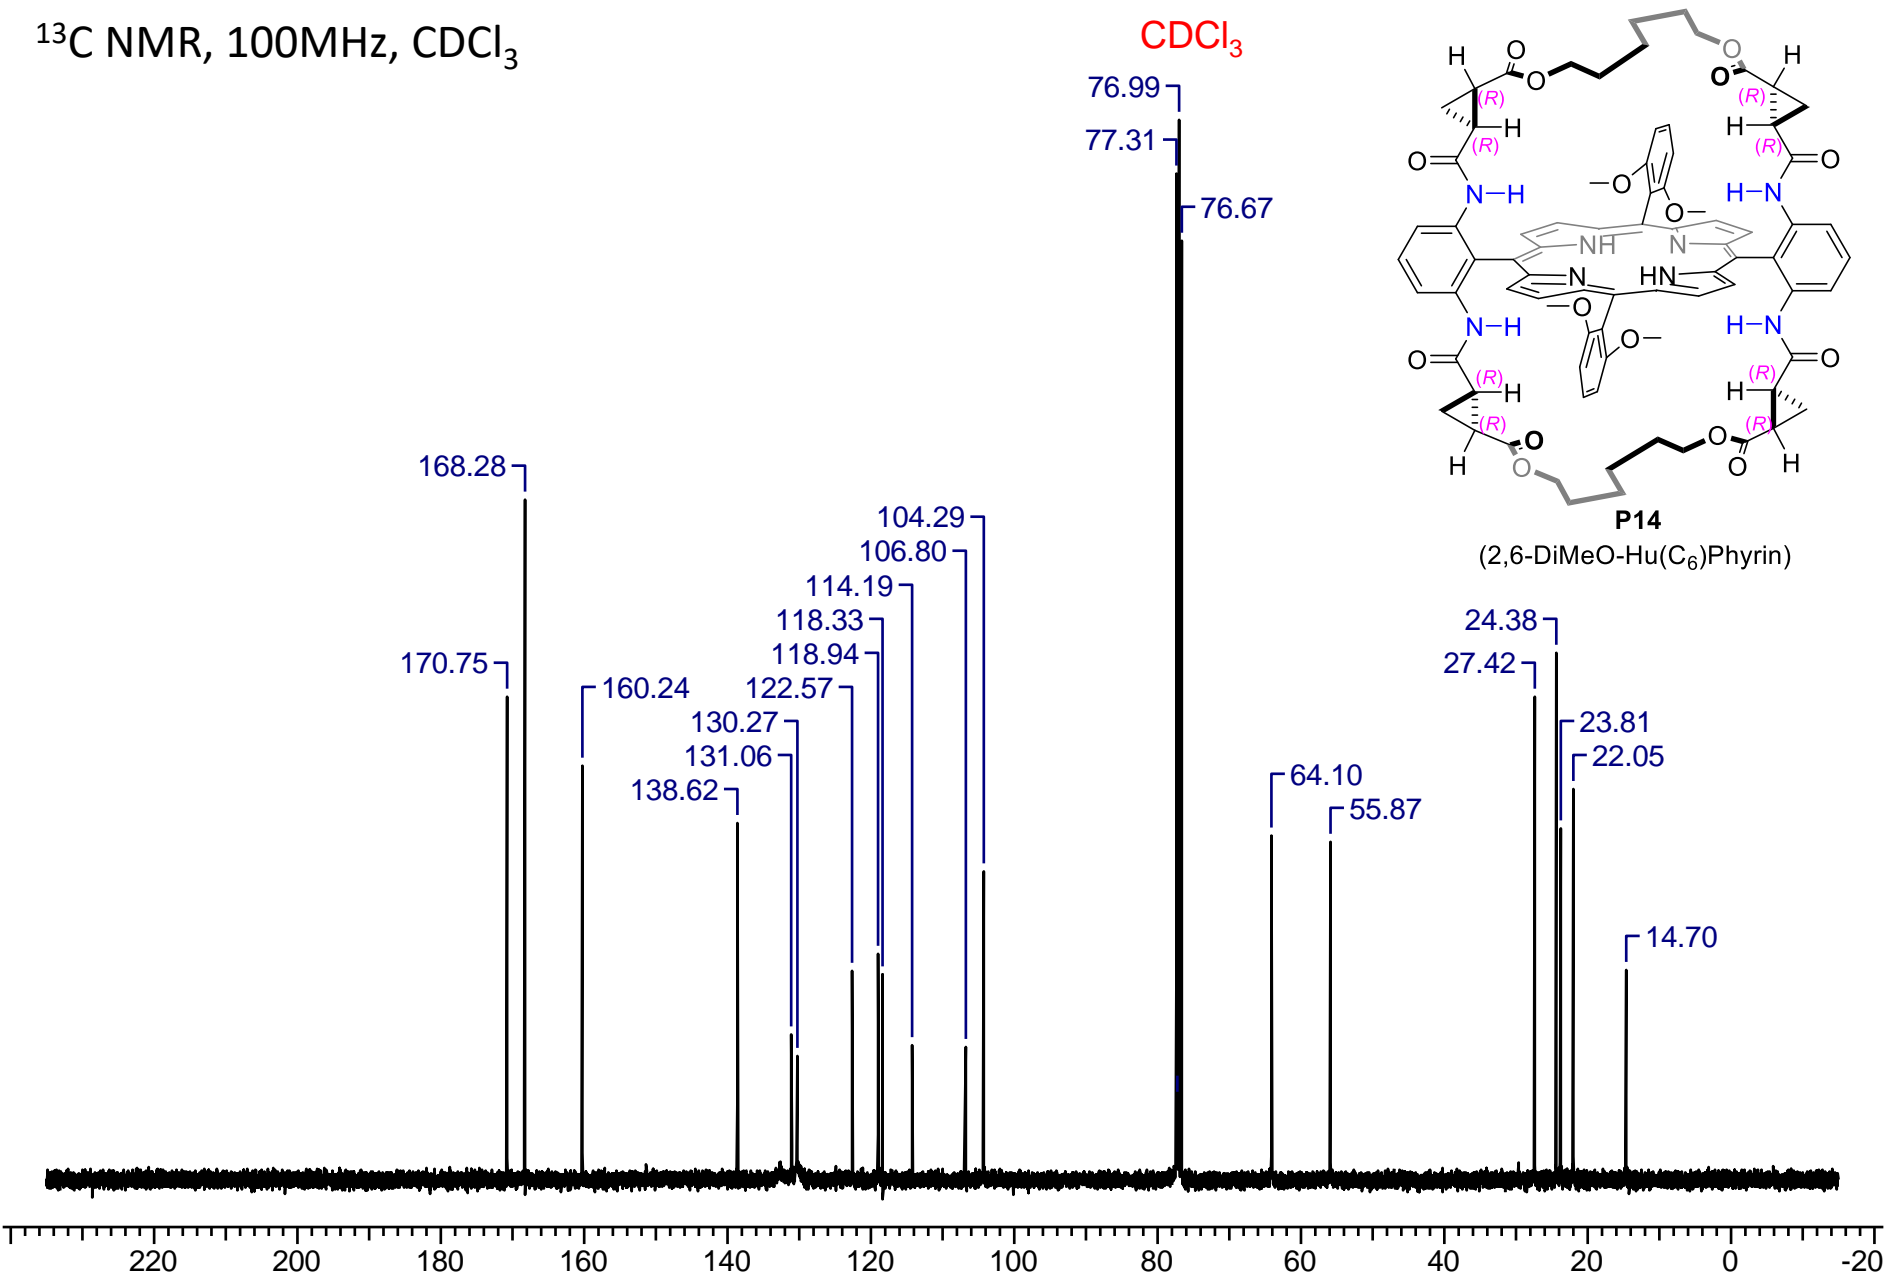

C<sub>6</sub>H<sub>6</sub>

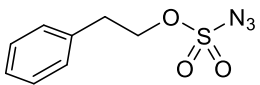

<sup>1</sup>H NMR of **1a**, 600MHz, C<sub>6</sub>D<sub>6</sub>

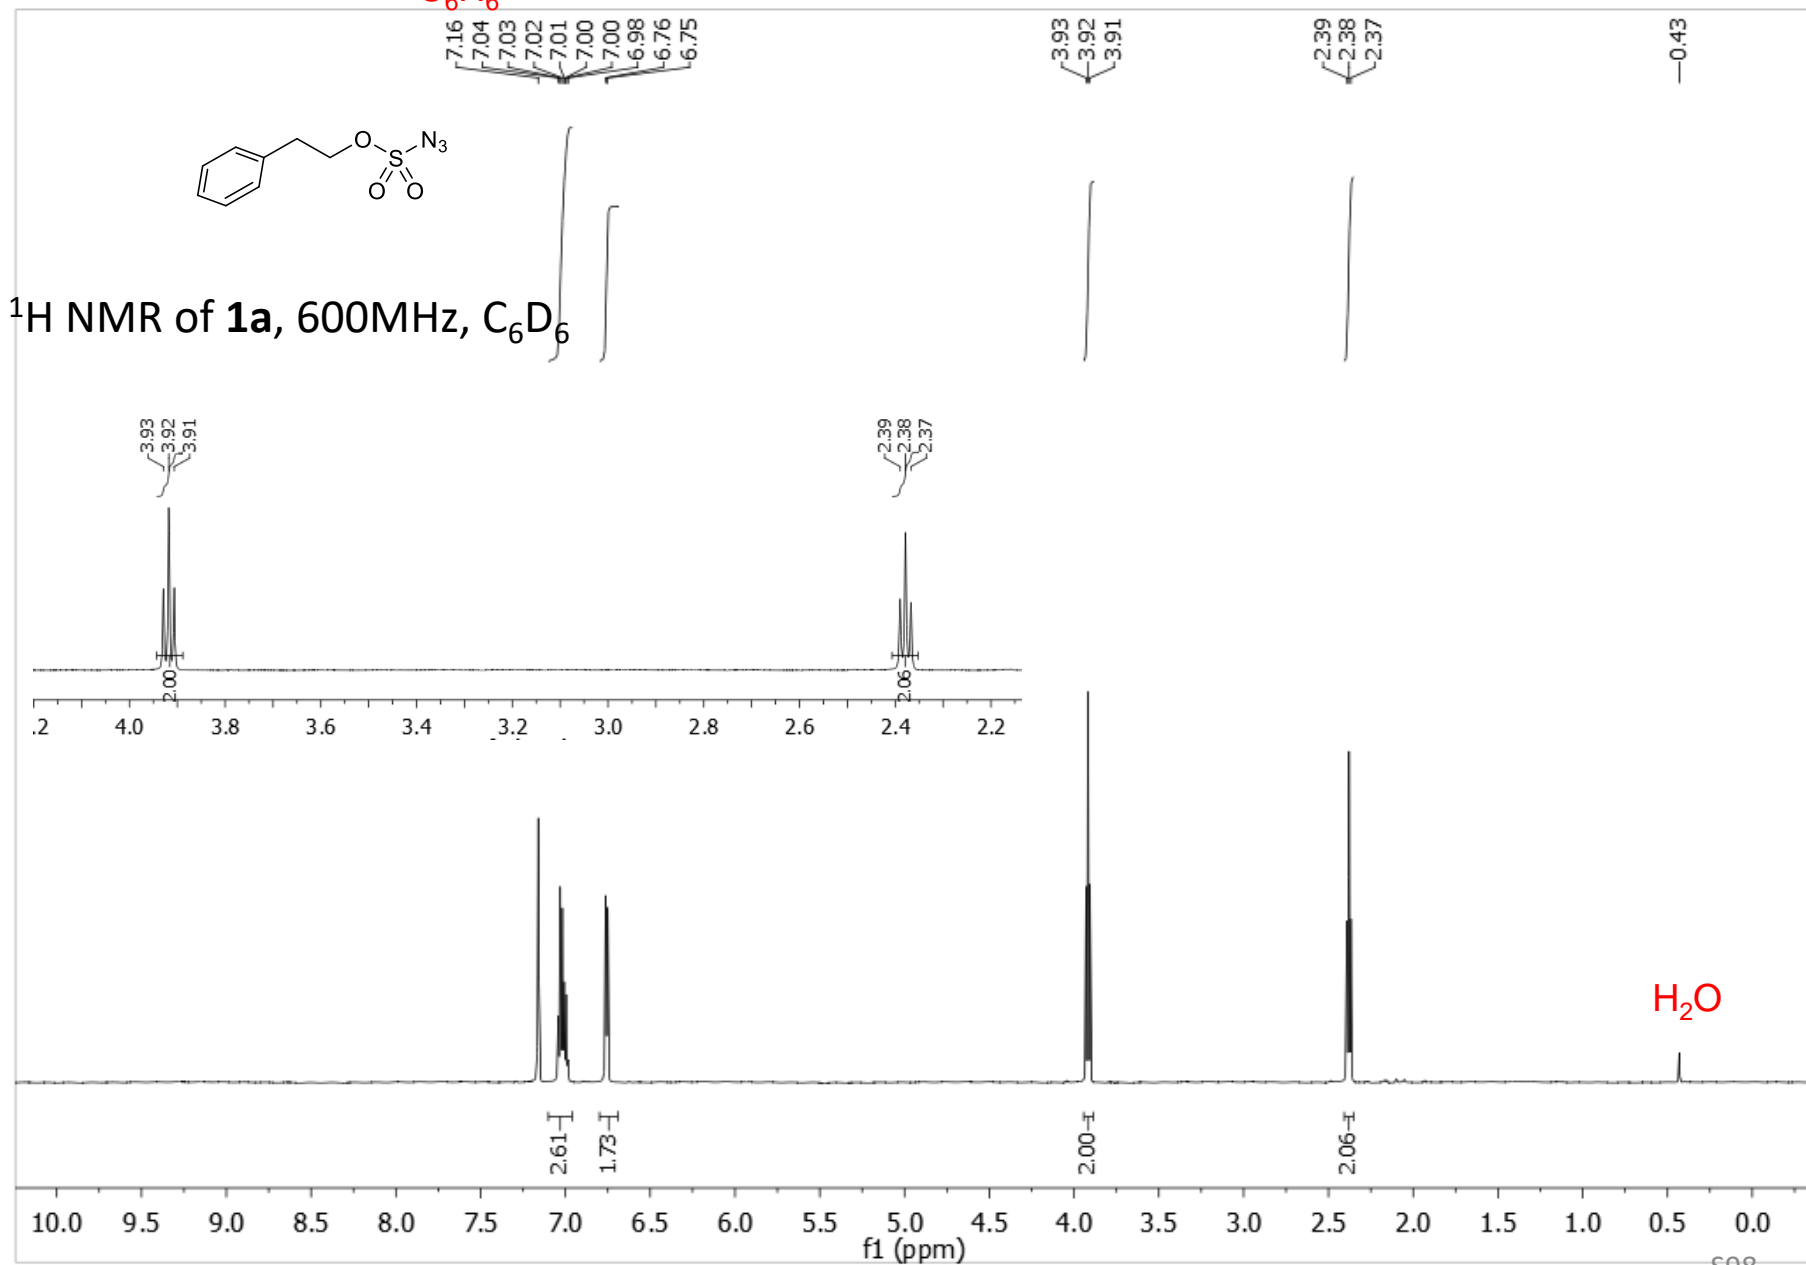



$^1\text{H}$  NMR of **1a**, 150 MHz,  $\text{CDCl}_3$

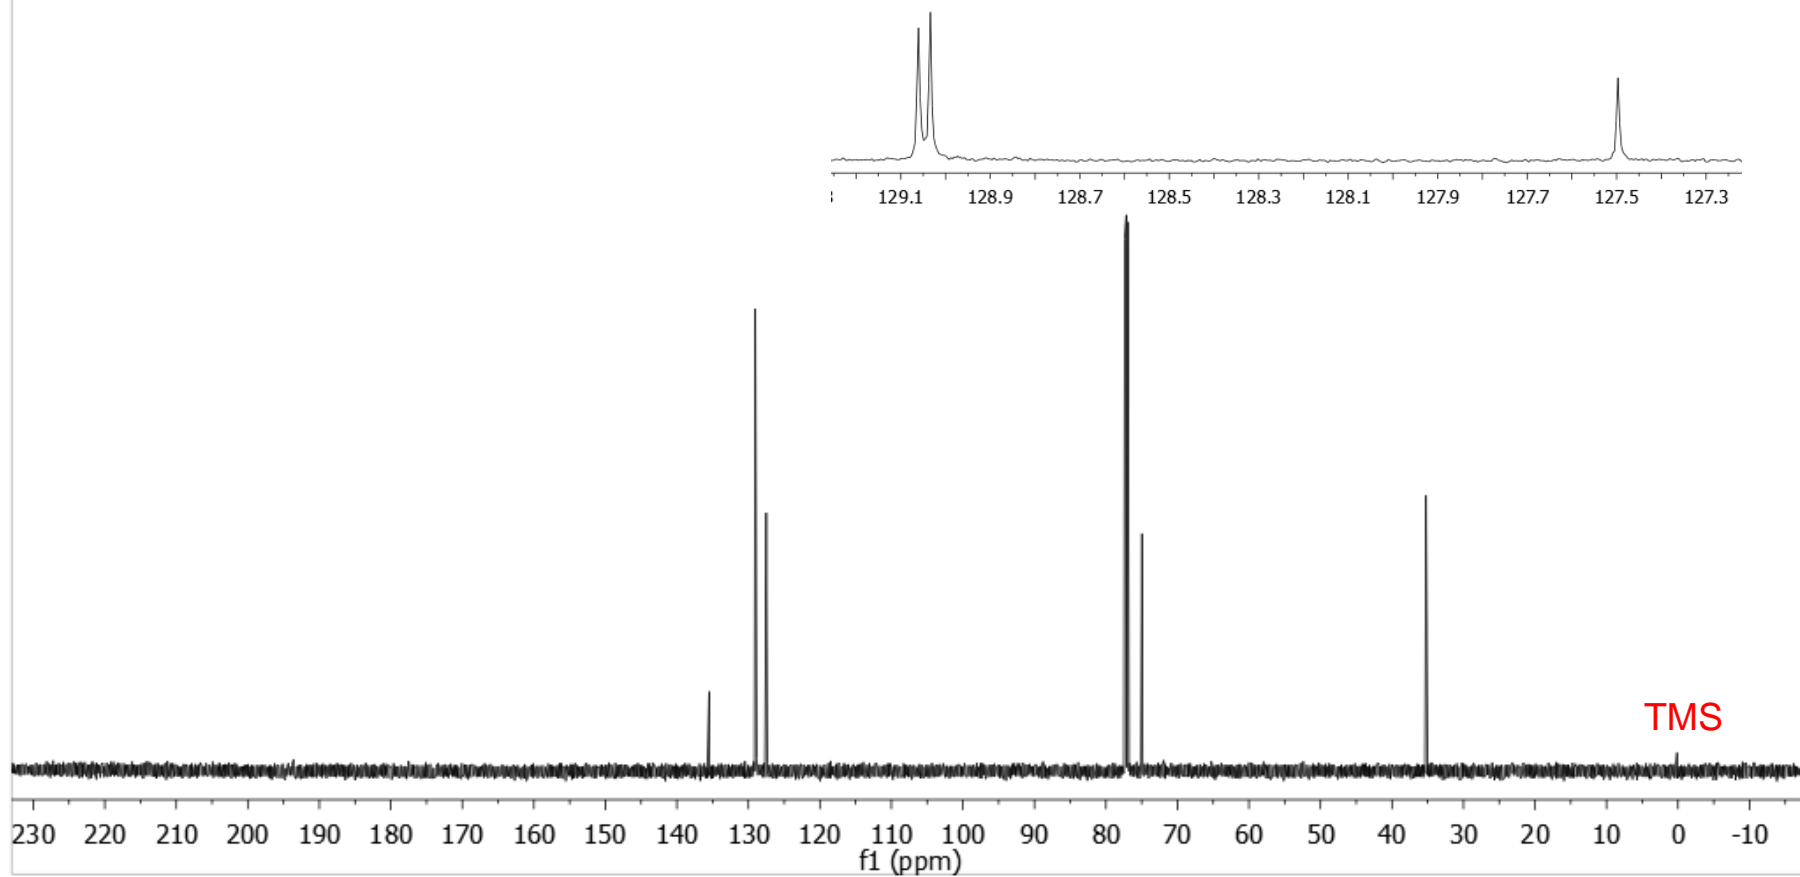

CHCl<sub>3</sub>

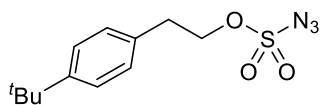

<sup>1</sup>H NMR of **1b**, 400 MHz, CDCl<sub>3</sub>

7.37  
7.37  
7.35  
7.35  
7.24  
7.18  
7.18  
7.16  
7.16

4.56  
4.56  
4.54  
4.54  
4.52  
4.52

3.09  
3.07  
3.05

1.31  
1.31  
1.30  
1.30

4.56  
4.56  
4.54  
4.54  
4.52  
4.52

3.09  
3.07  
3.05

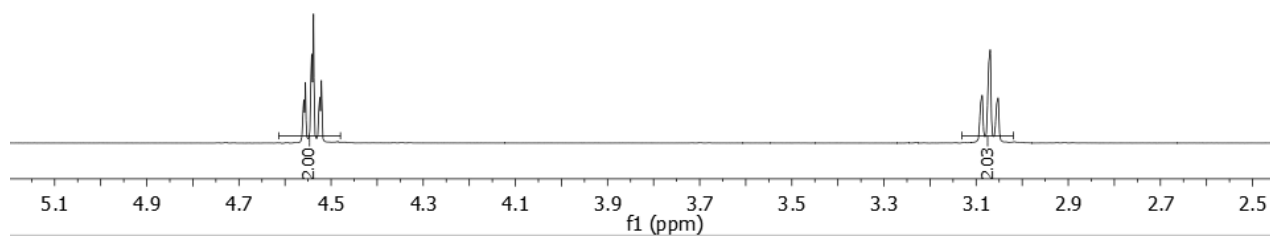

1.89-I  
1.98-I

2.00-I

2.03-I

9.23-I

10.0 9.5 9.0 8.5 8.0 7.5 7.0 6.5 6.0 5.5 5.0 4.5 4.0 3.5 3.0 2.5 2.0 1.5 1.0 0.5 0.0

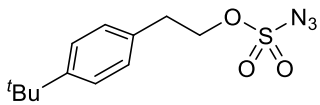

$^{13}\text{C}$  NMR of **1b**, 100MHz,  $\text{CDCl}_3$

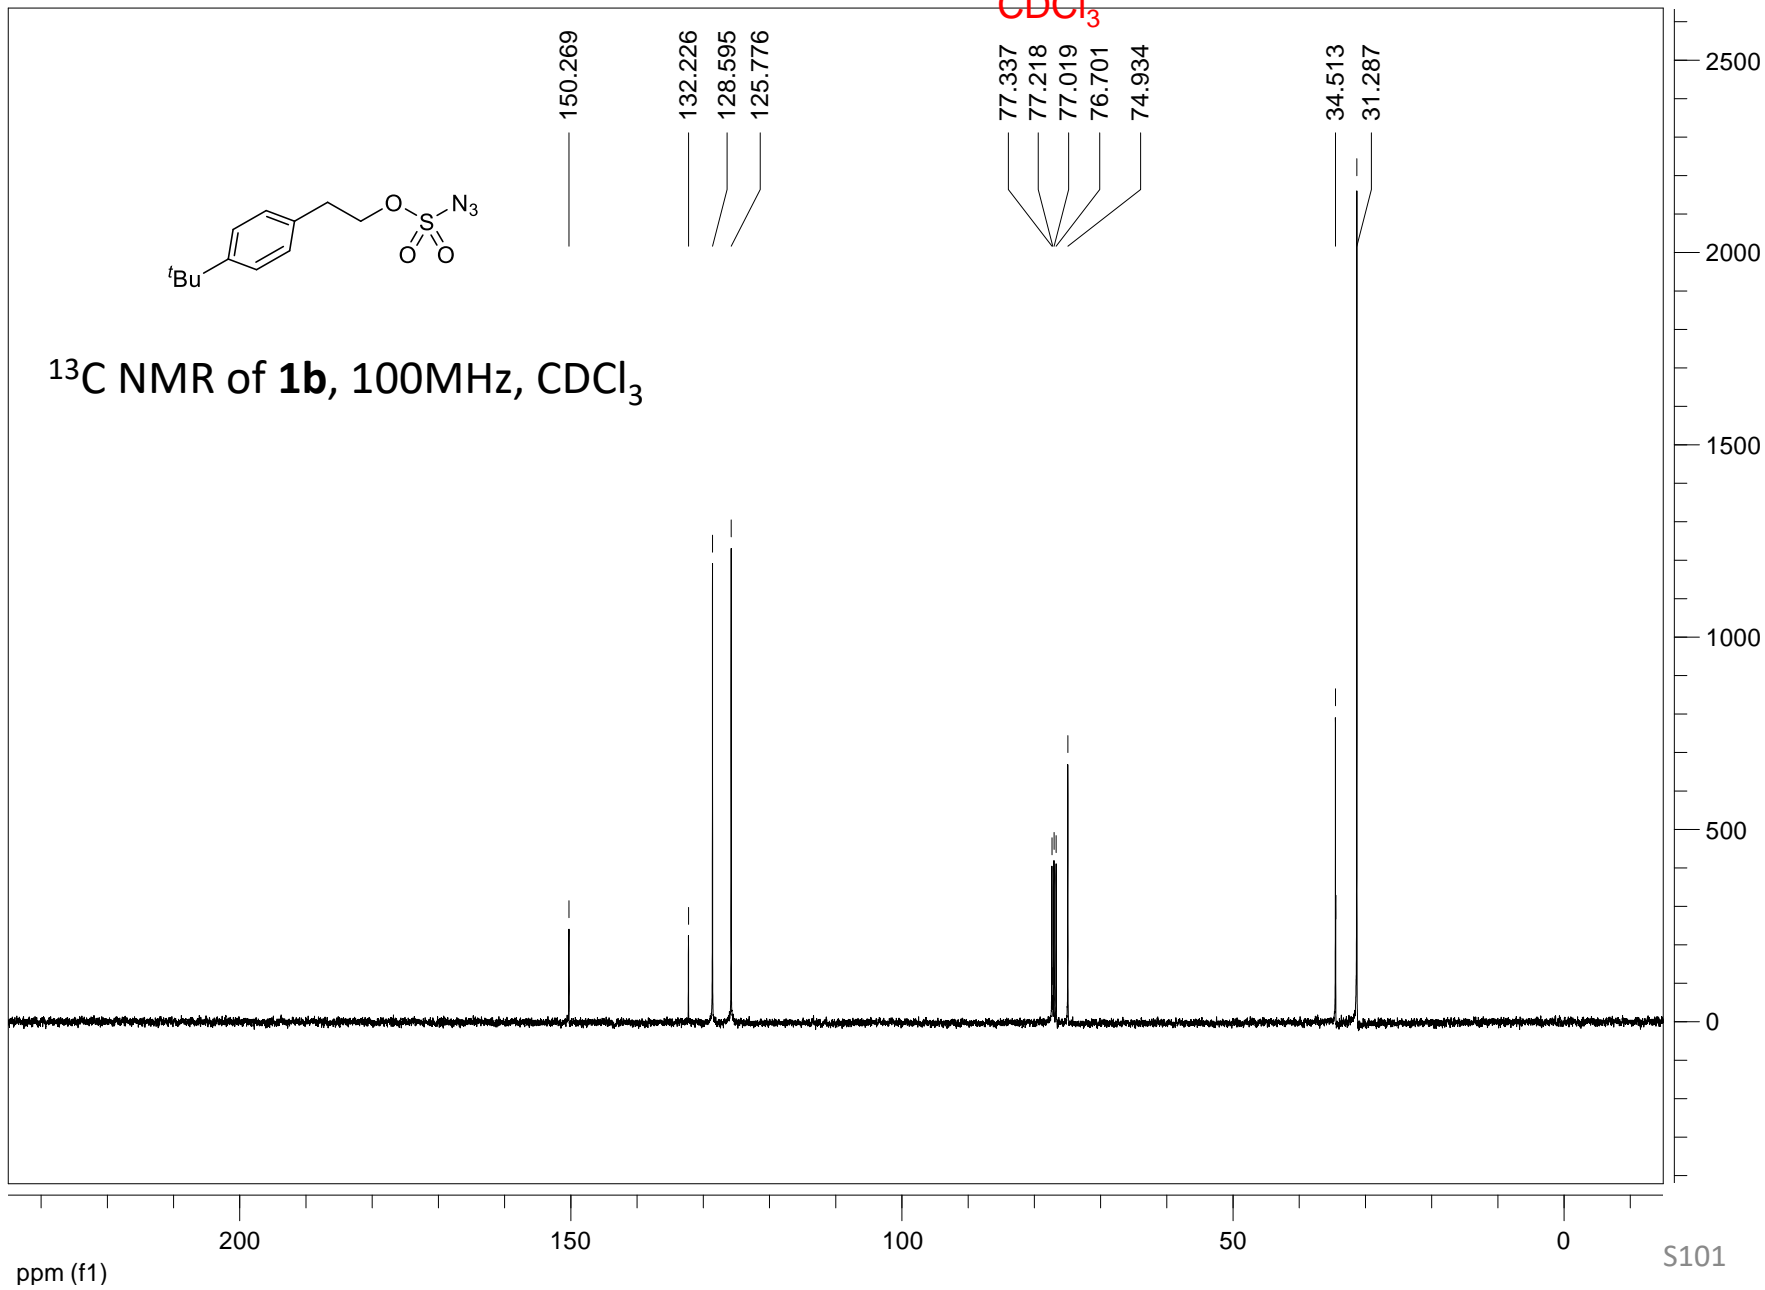

CHCl<sub>3</sub>

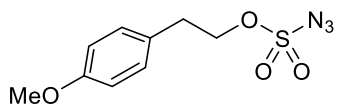

<sup>1</sup>H NMR of **1c**, 250 MHz, CDCl<sub>3</sub>

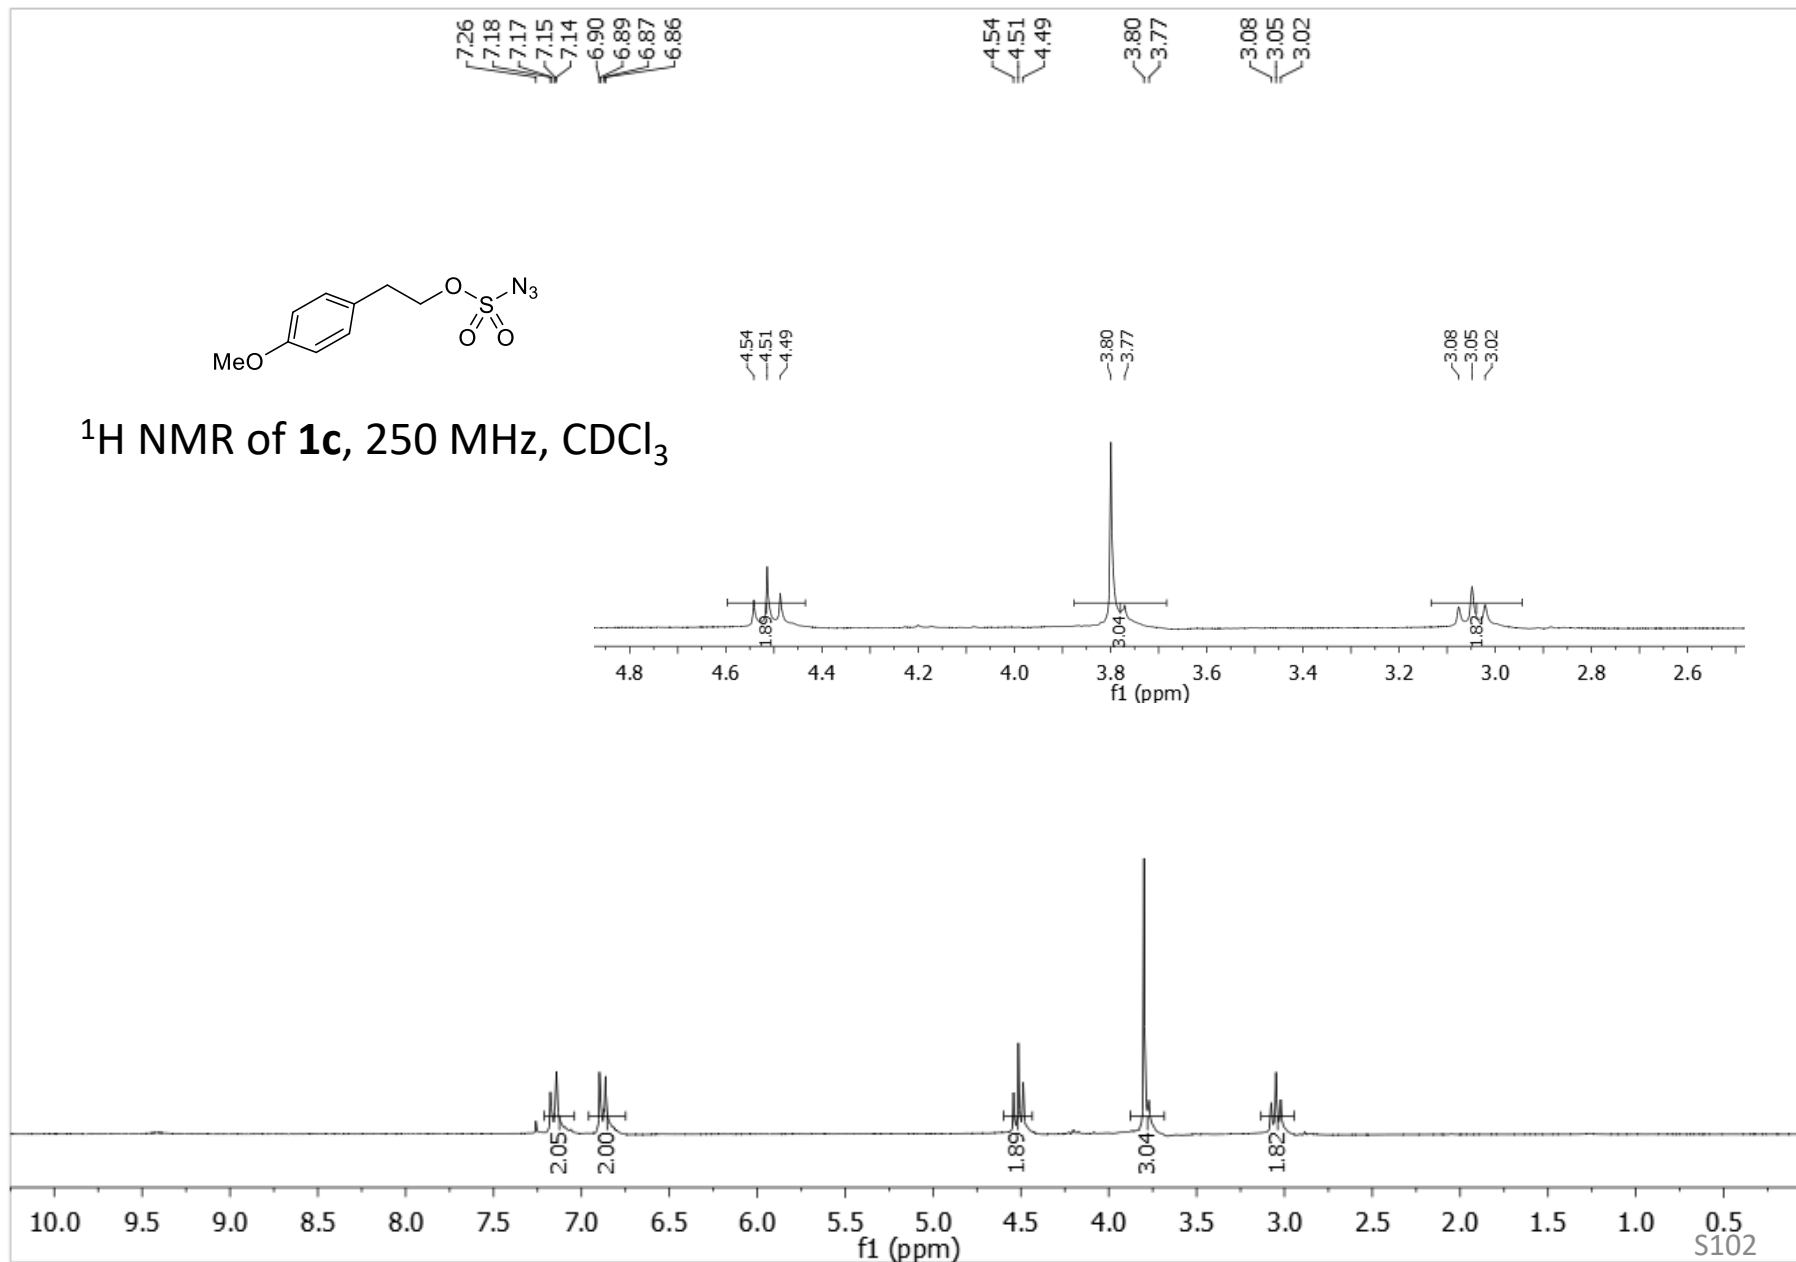

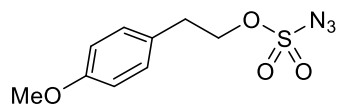

$^{13}\text{C}$  NMR of **1c**, 150 MHz,  $\text{CDCl}_3$

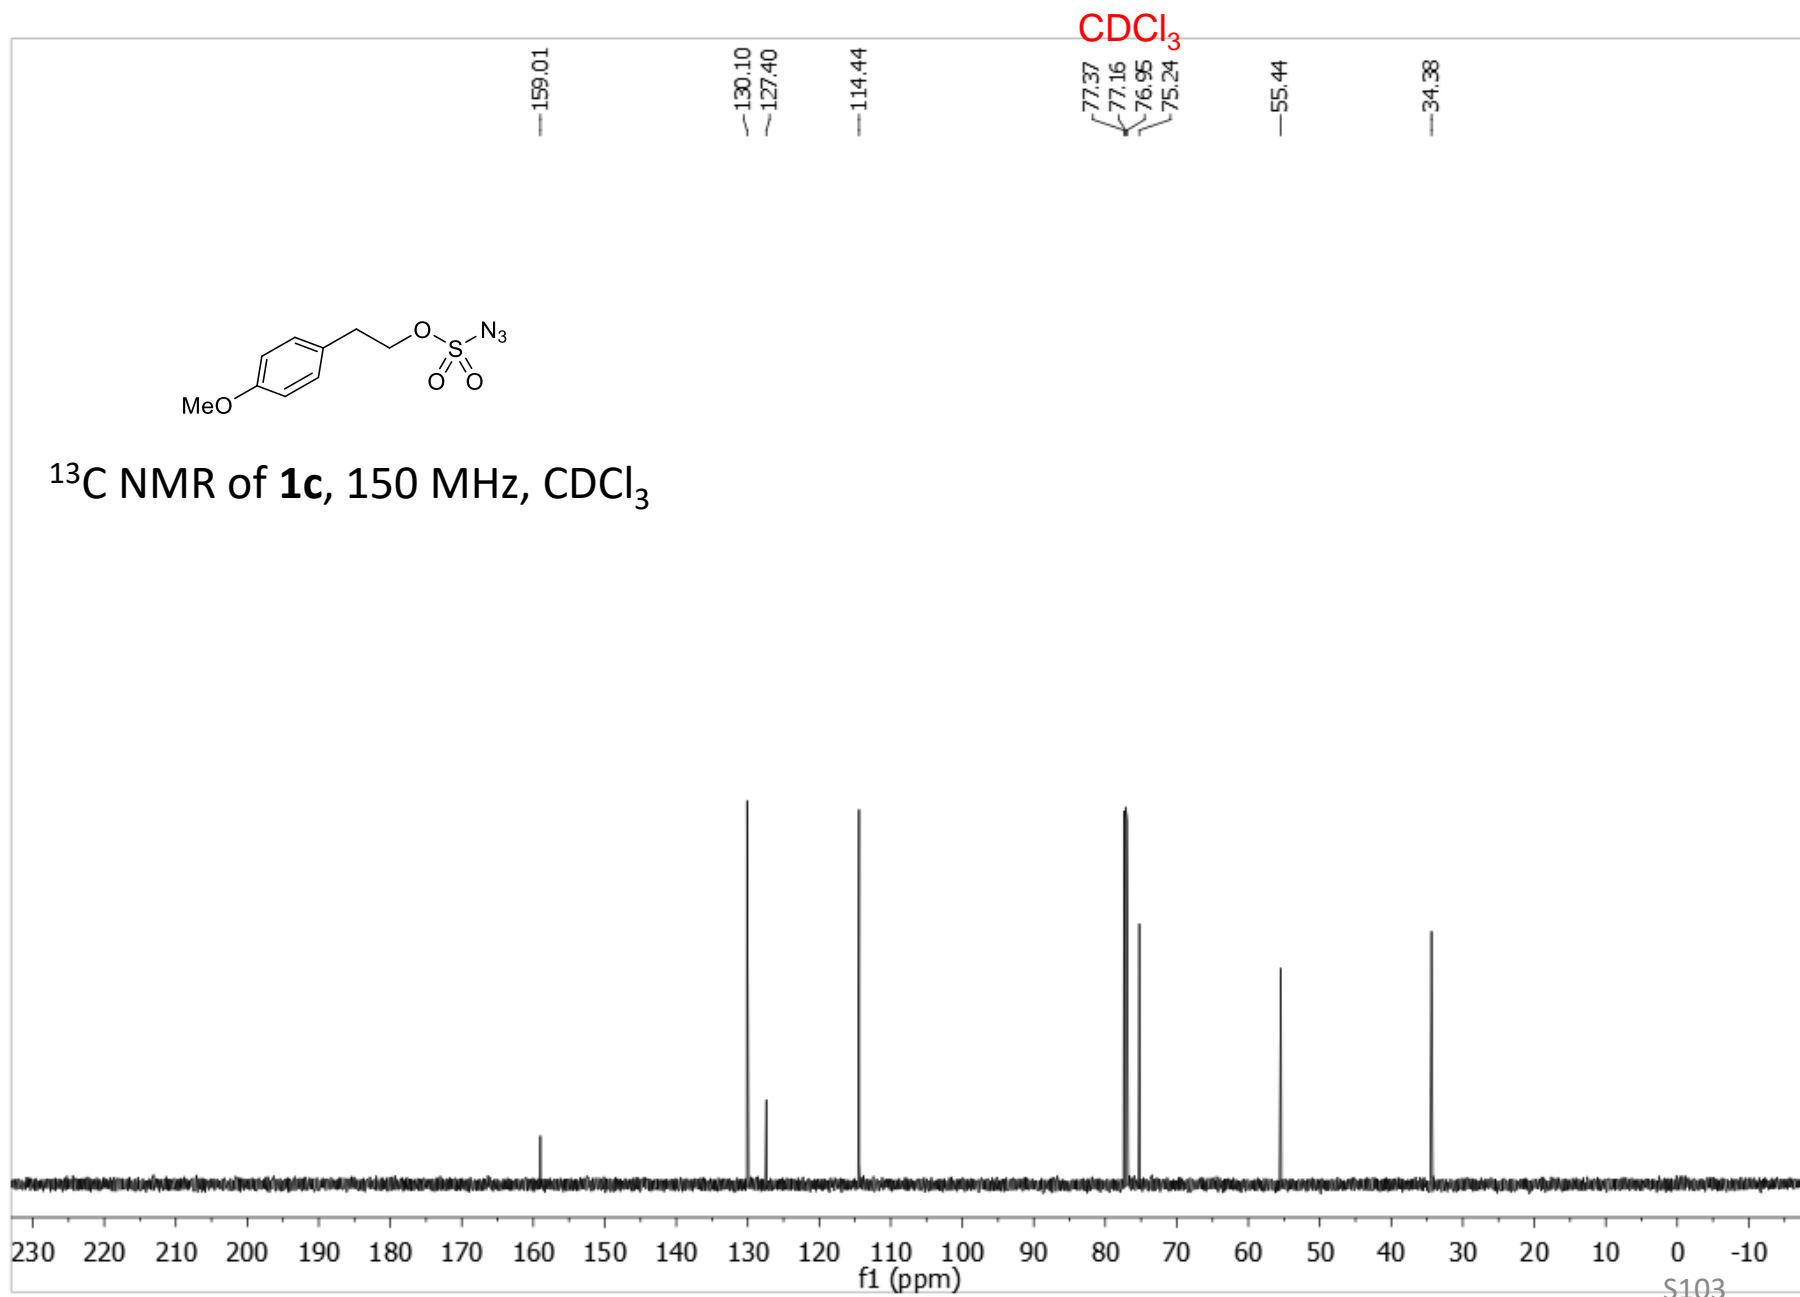



CHCl<sub>3</sub>

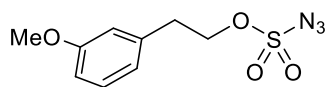

<sup>1</sup>H NMR of **1d**, 400 MHz, CDCl<sub>3</sub>

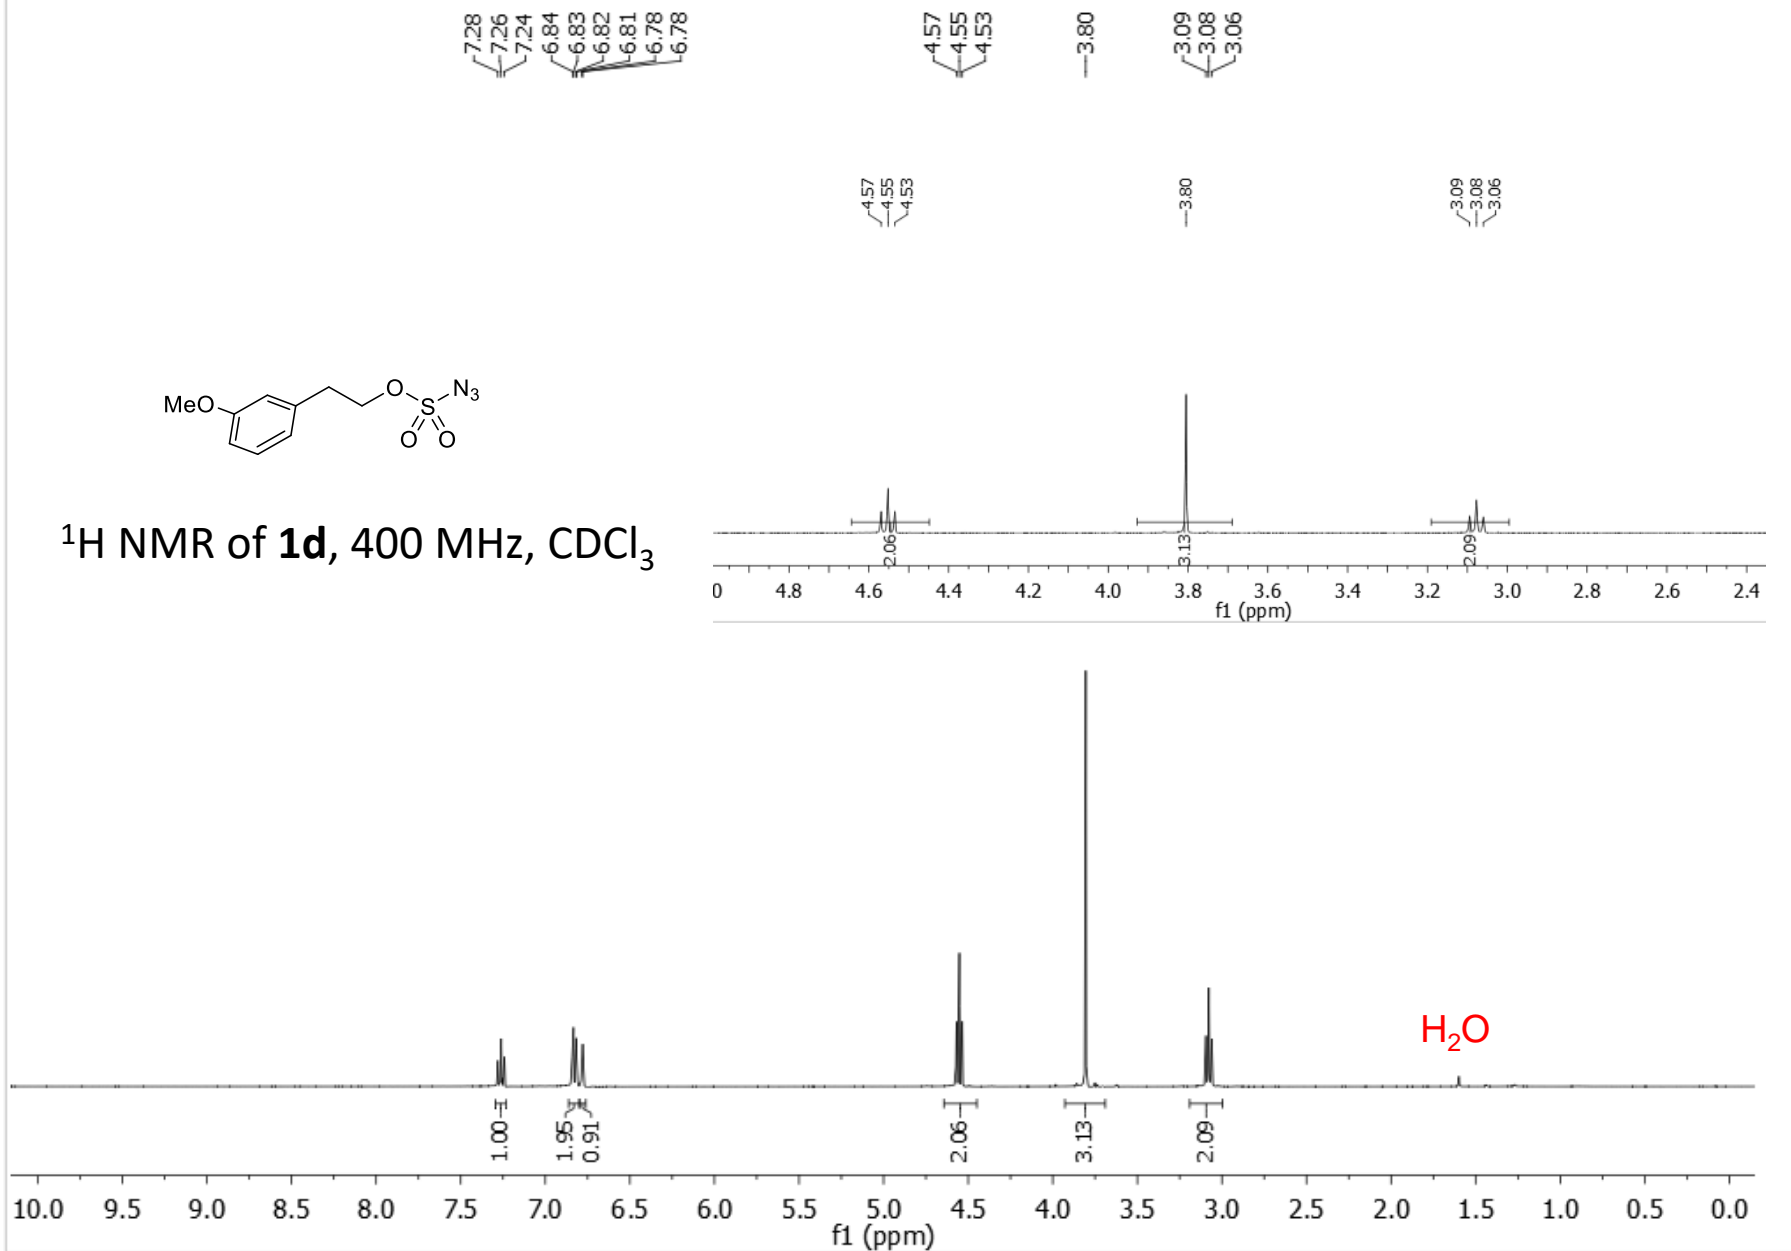

CDCl<sub>3</sub>

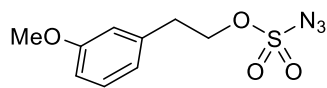

<sup>13</sup>C NMR of **1d**, 100 MHz, CDCl<sub>3</sub>

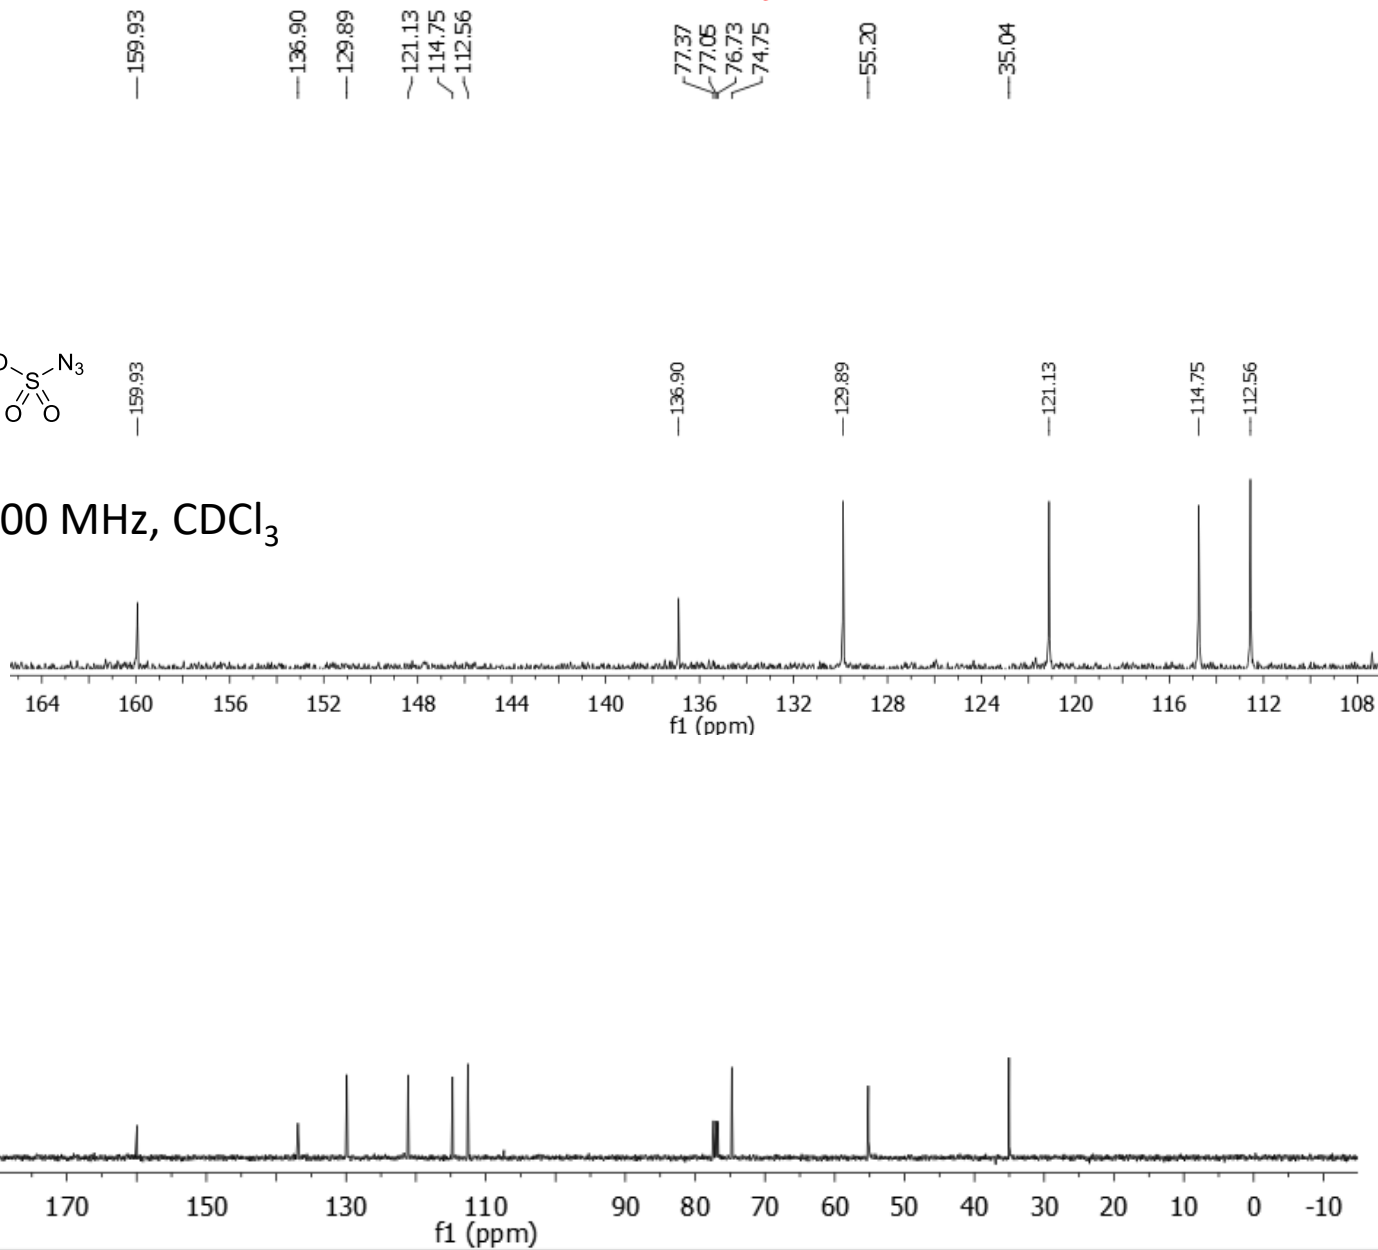

$C_6H_6$

7.74  
7.74  
7.73  
7.72  
7.72  
7.16  
6.41  
6.40  
6.40  
6.39  
6.38

3.75  
3.74  
3.73

2.15  
2.14  
2.13

0.47

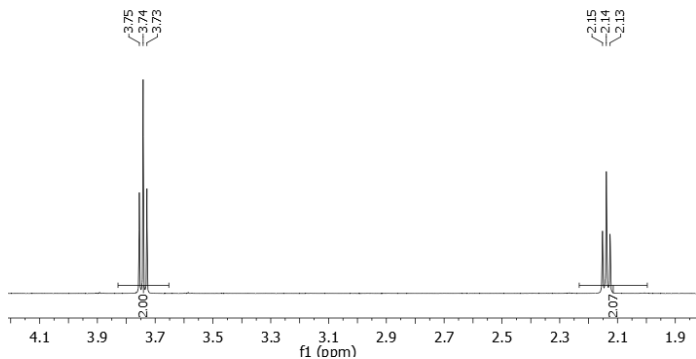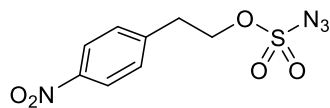

$^1H$  NMR of **1e**, 500 MHz,  $C_6D_6$

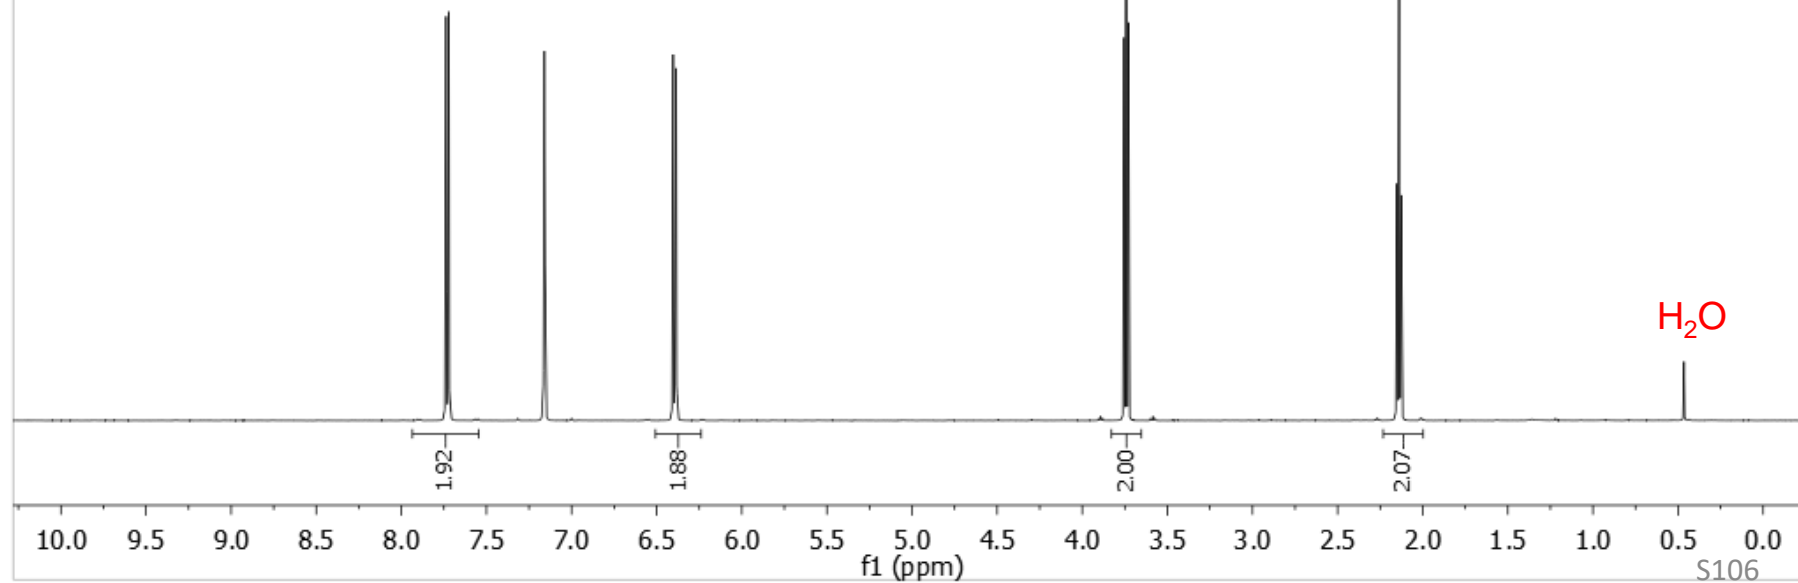

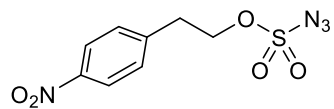

$^{13}\text{C}$  NMR of **1e**, 150 MHz,  $\text{CDCl}_3$

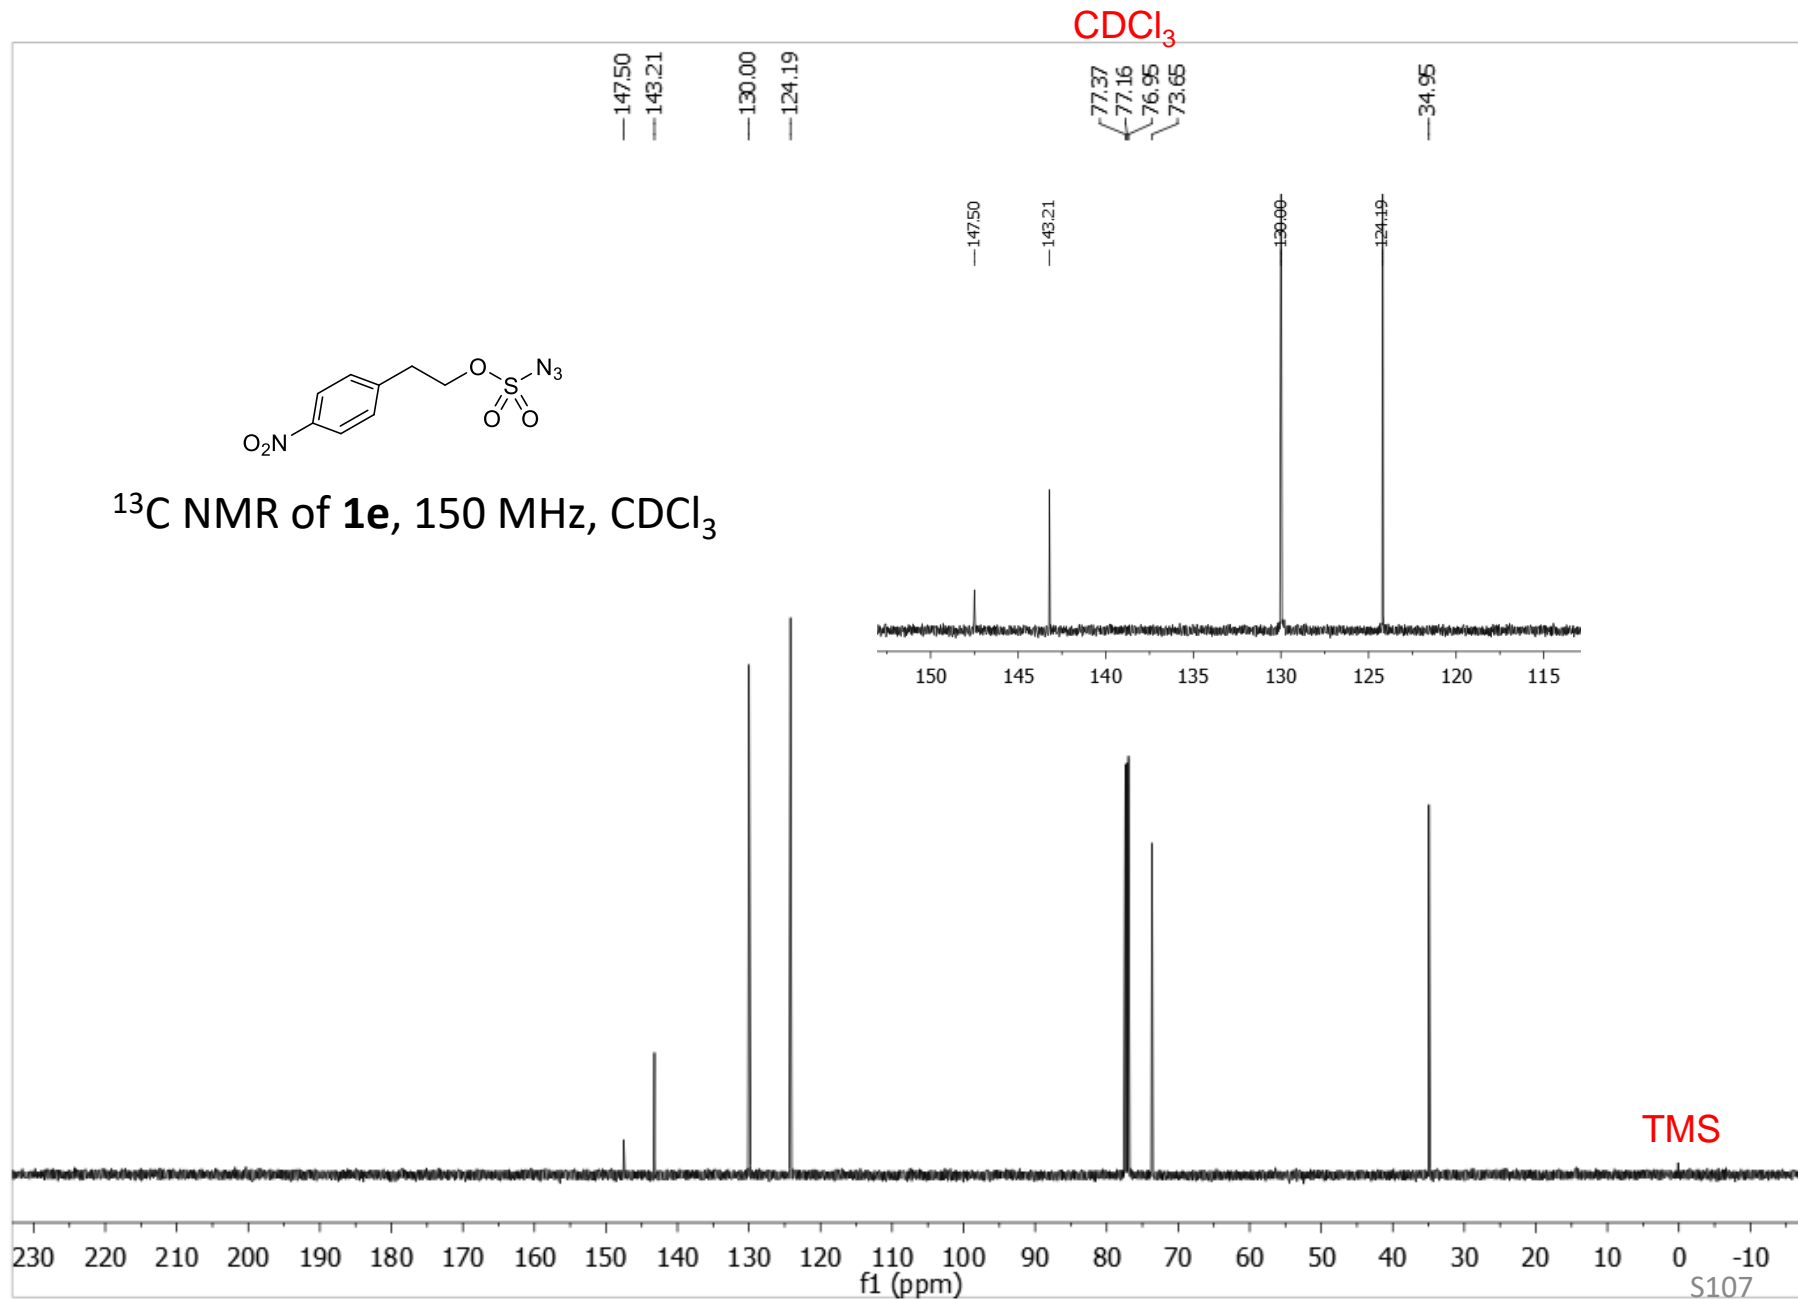

CHCl<sub>3</sub>

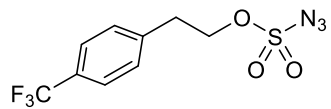

<sup>1</sup>H NMR of **1f**, 400 MHz, CDCl<sub>3</sub>

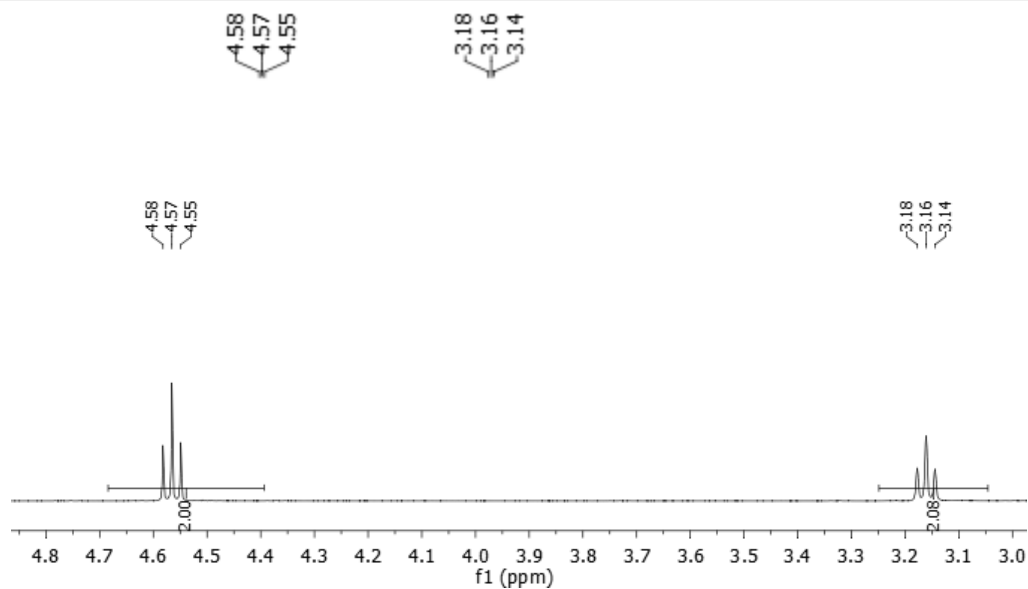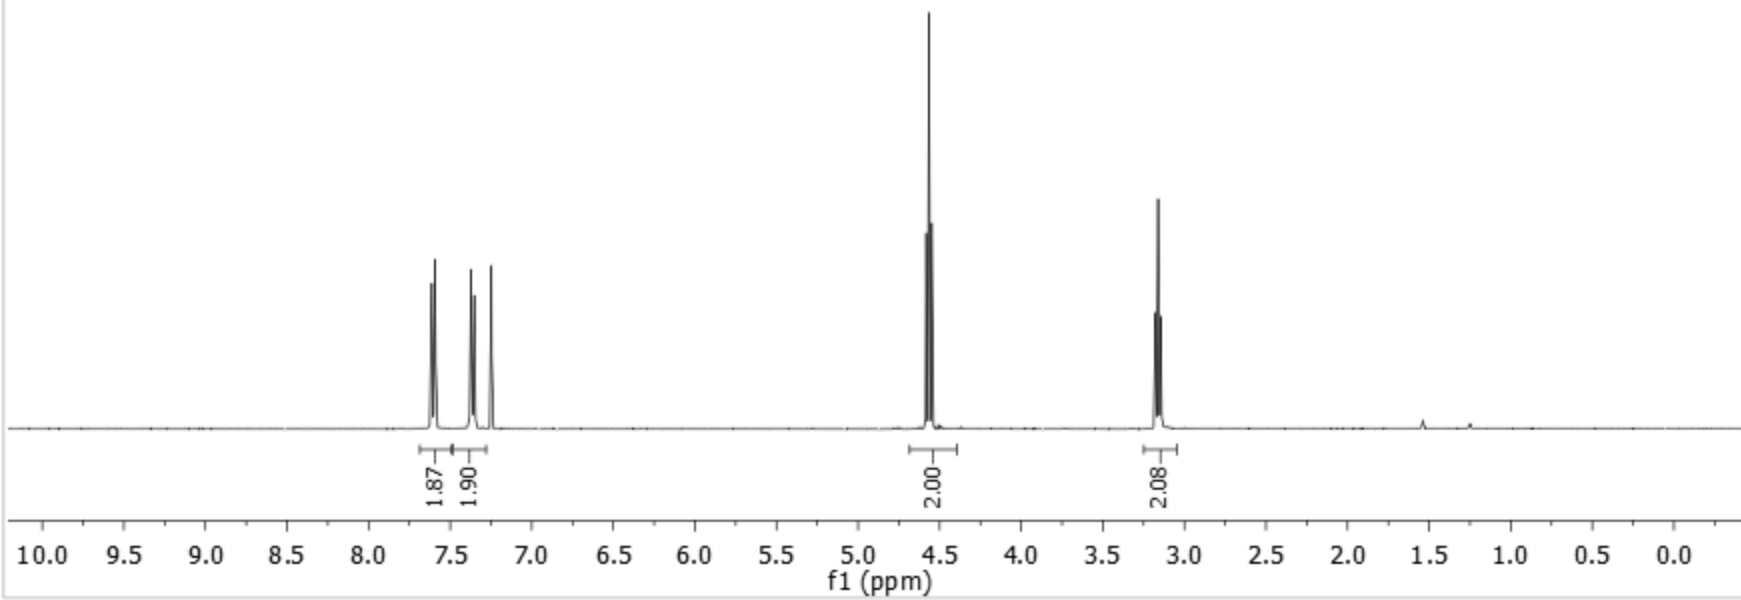

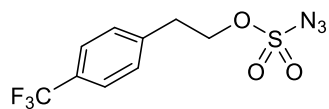

$^{13}\text{C}$  NMR of **1f**, 100 MHz,  $\text{CDCl}_3$

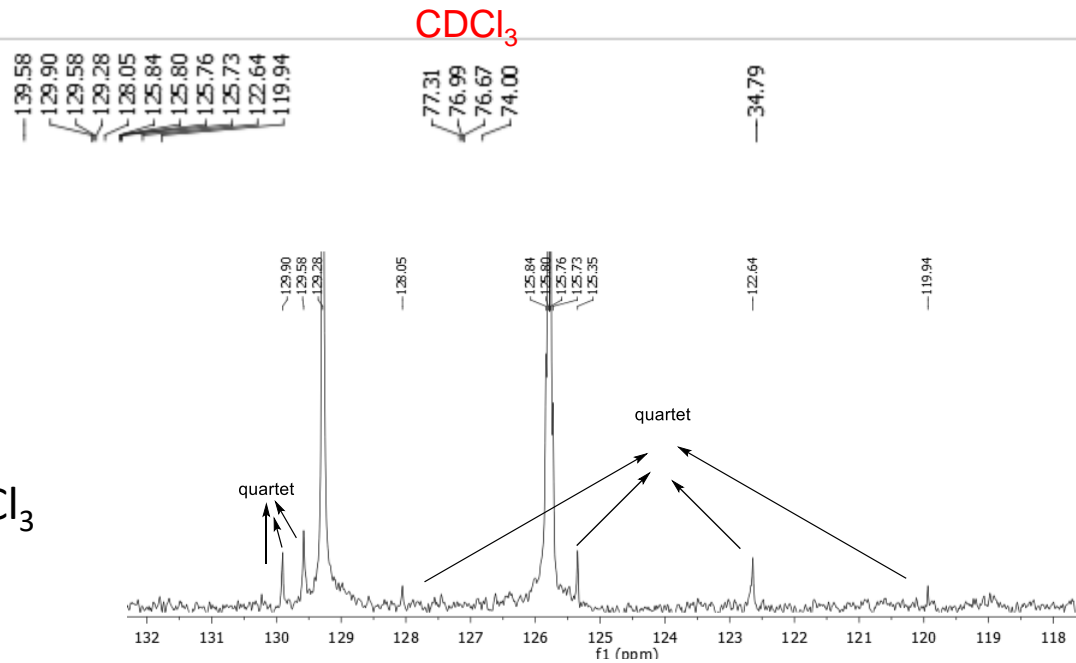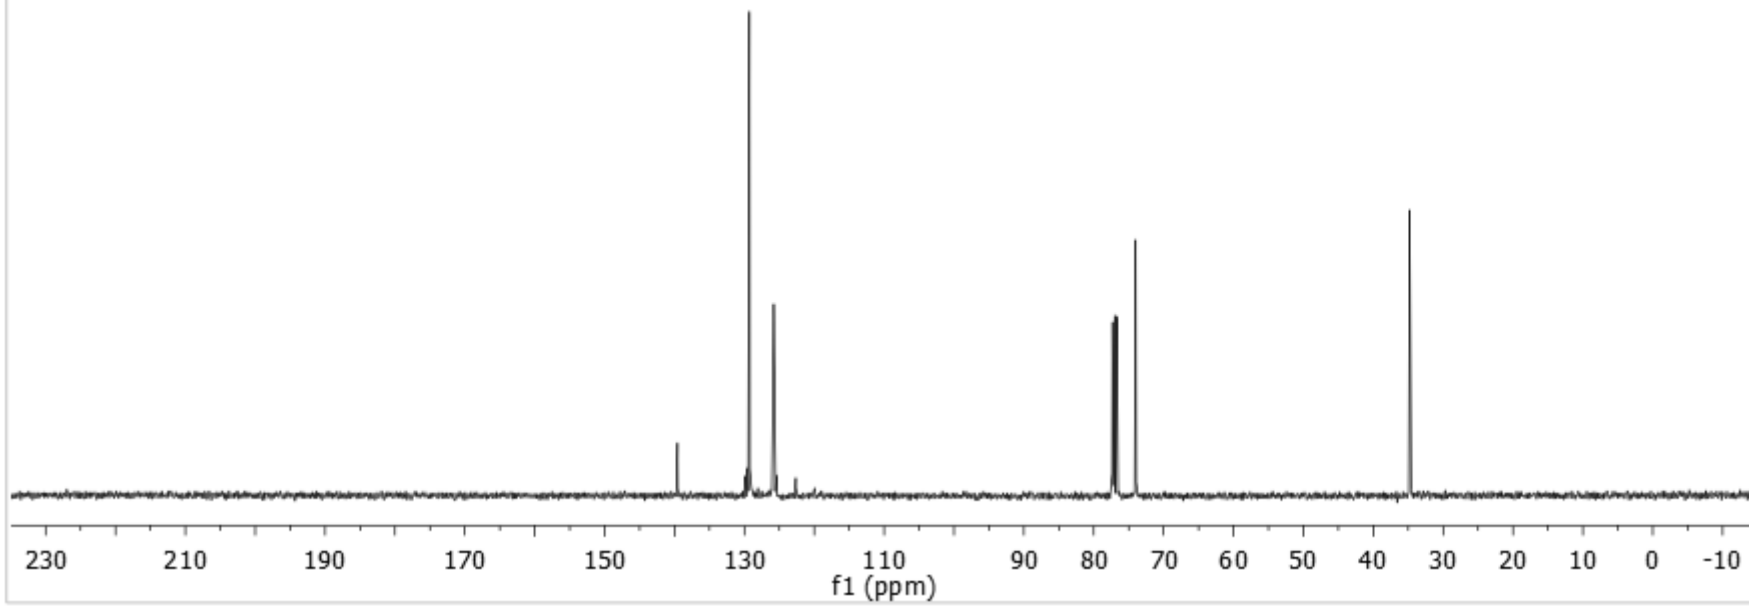

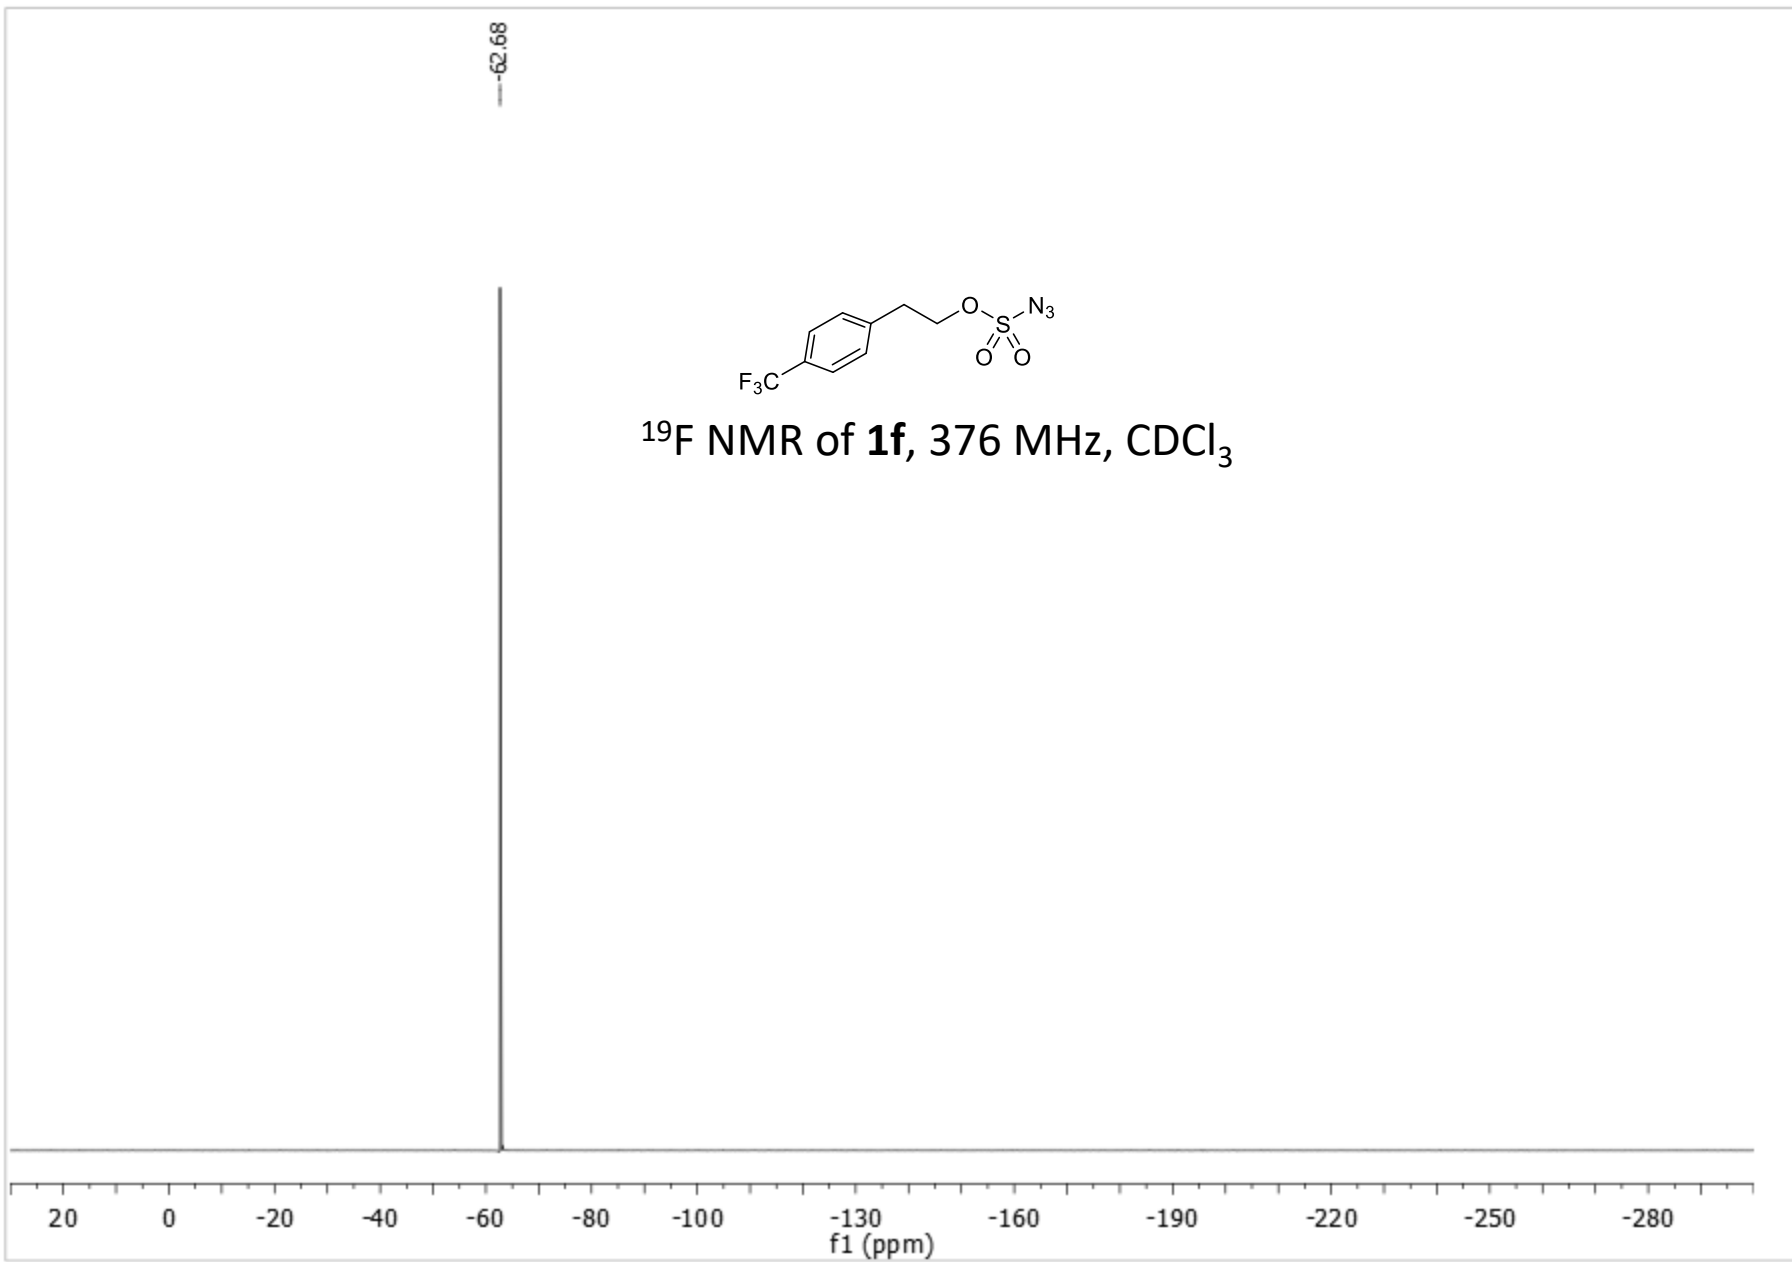

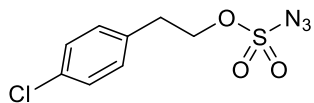

$^1\text{H}$  NMR of **1g**, 250MHz,  $\text{CDCl}_3$

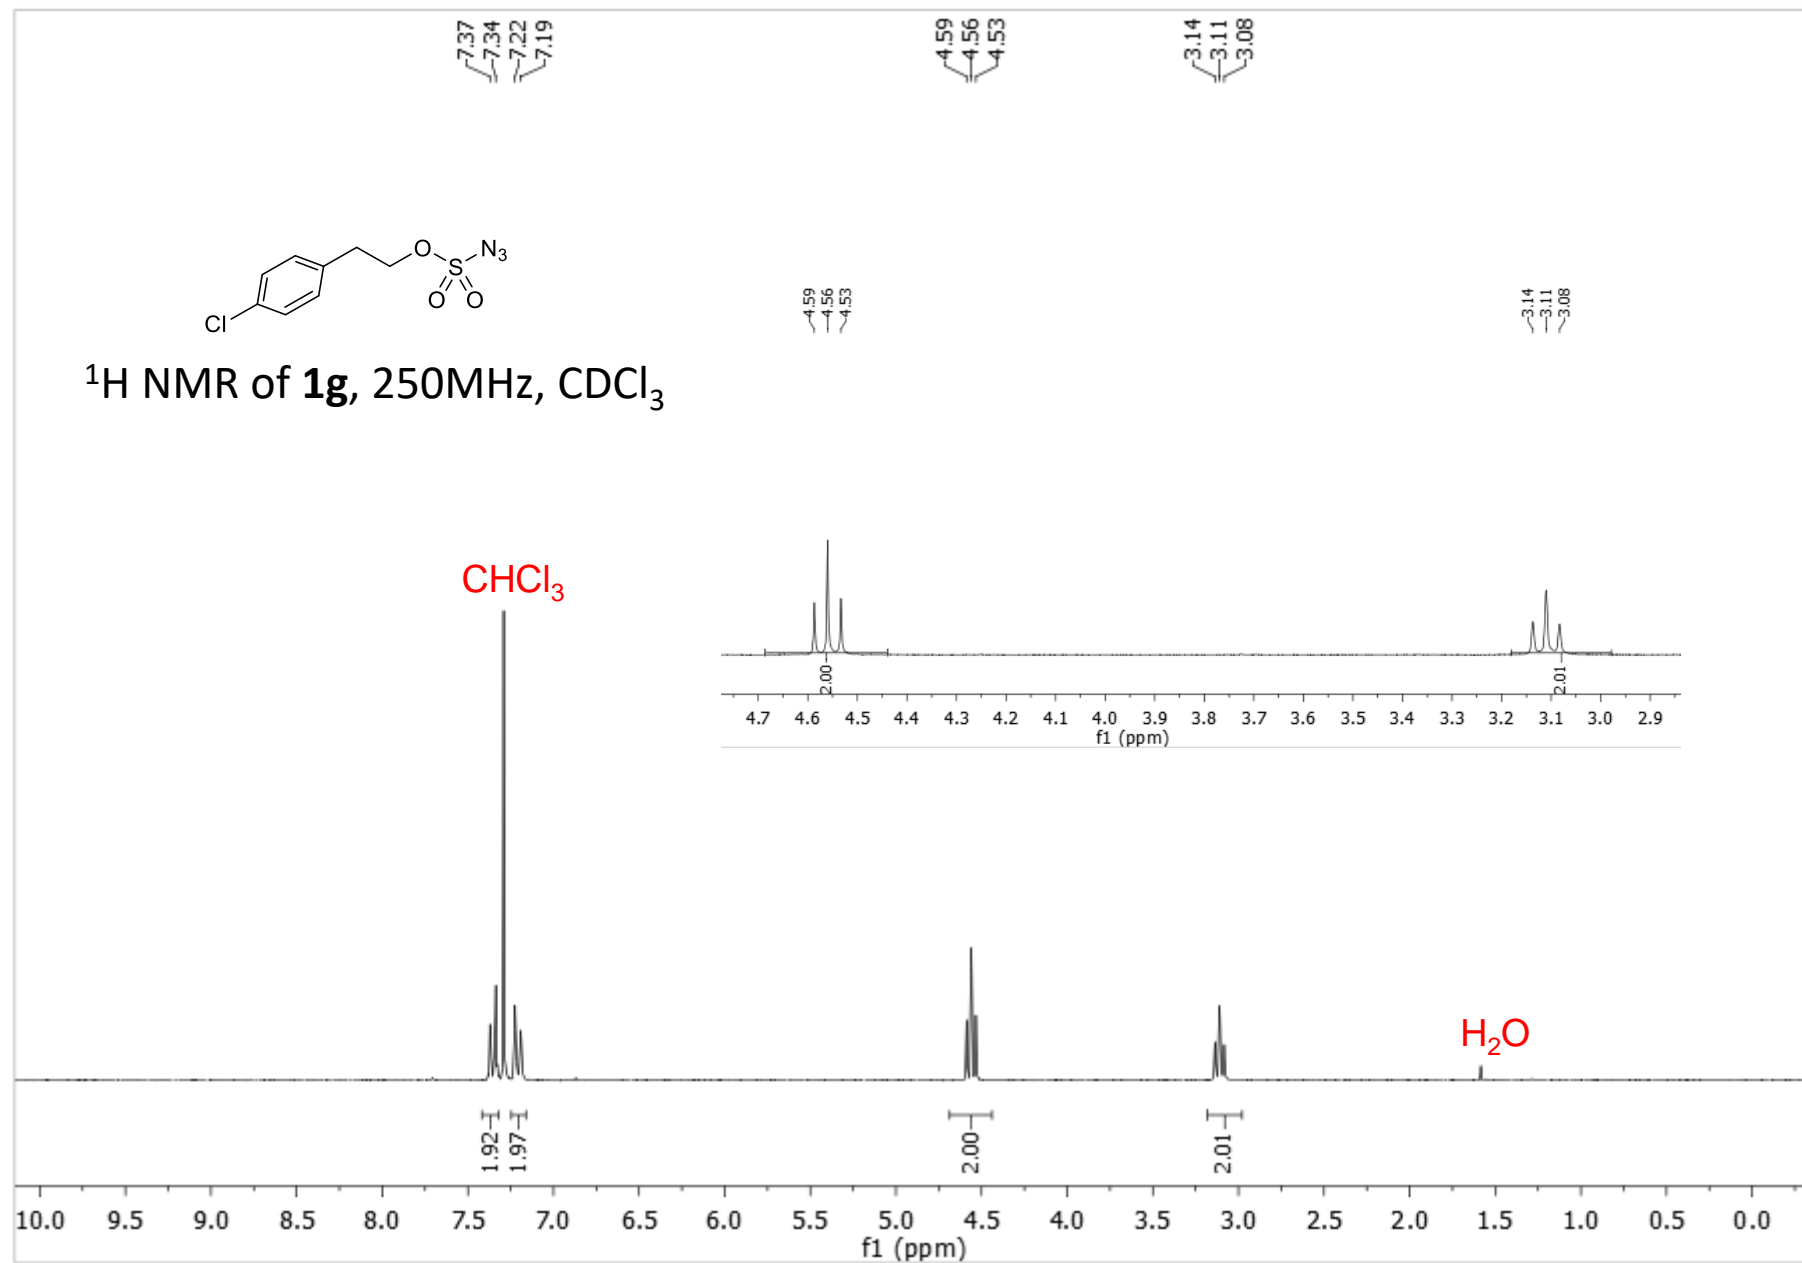





$^{13}\text{C}$  NMR of **1g**, 62.5 MHz,  $\text{CDCl}_3$

133.91  
133.27  
130.26  
129.01

$\text{CDCl}_3$

77.35  
77.03  
76.71  
74.40

34.39

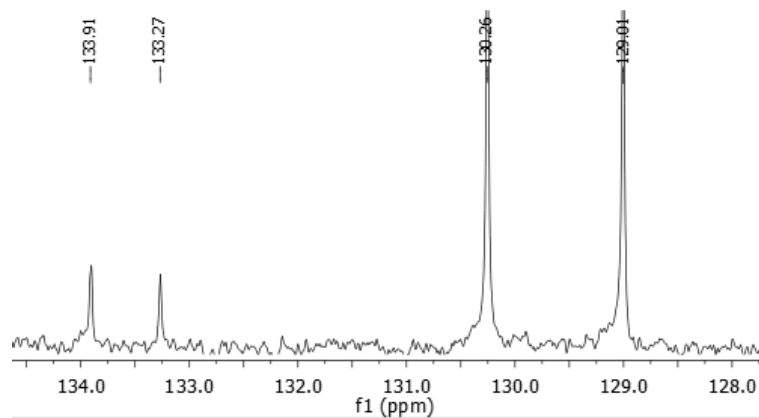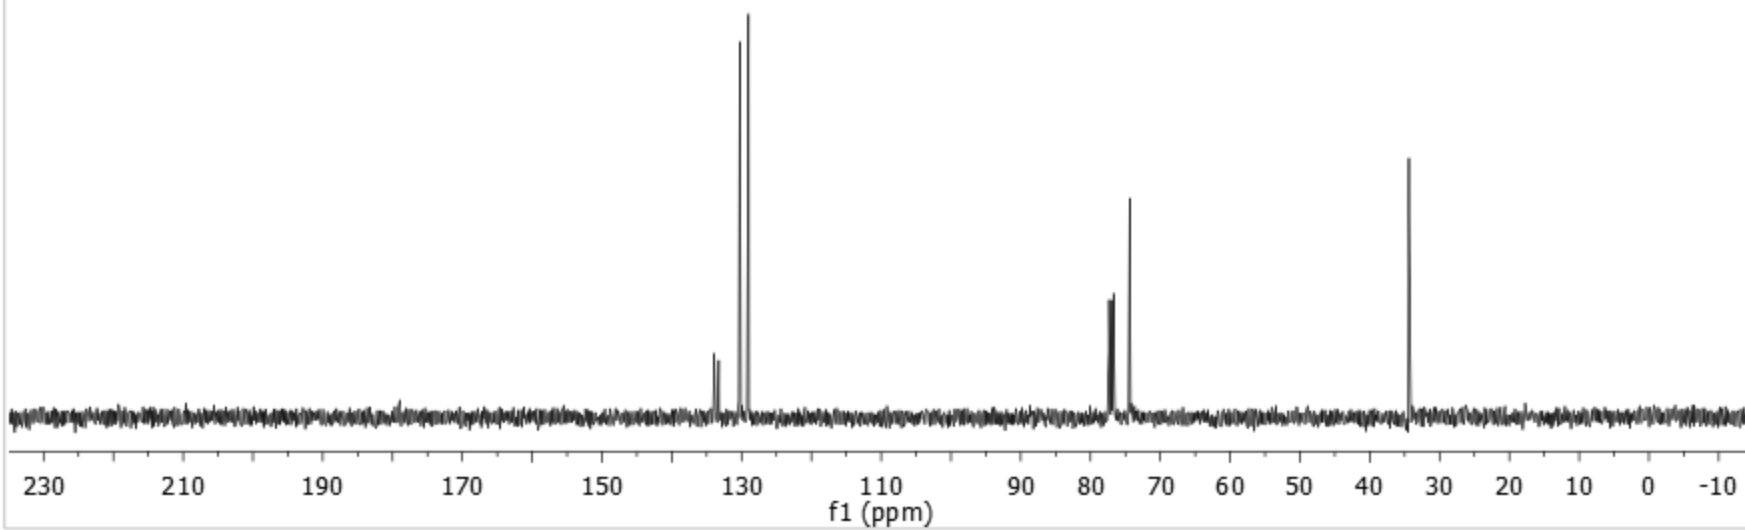

CHCl<sub>3</sub>

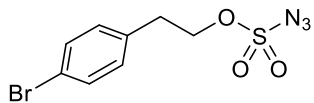

<sup>1</sup>H NMR of **1h**, 400 MHz, CDCl<sub>3</sub>

7.49  
7.47  
7.26  
7.13  
7.11

4.55  
4.53  
4.51

3.08  
3.07  
3.05

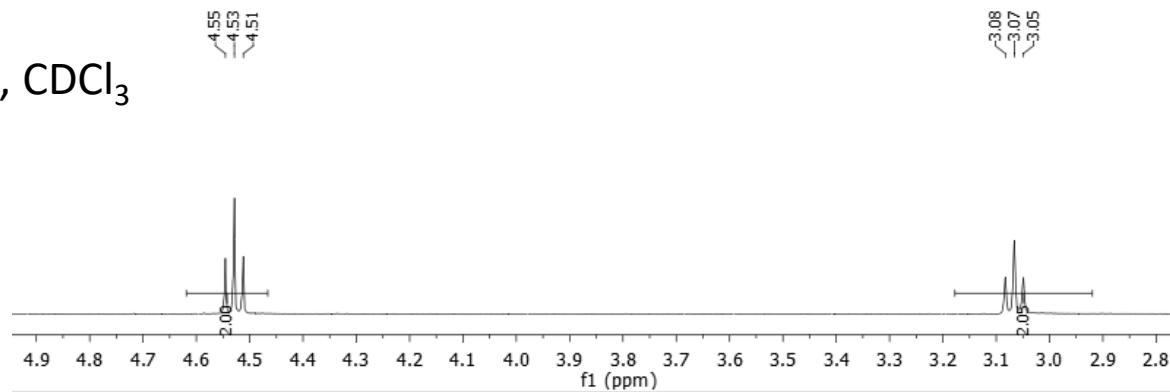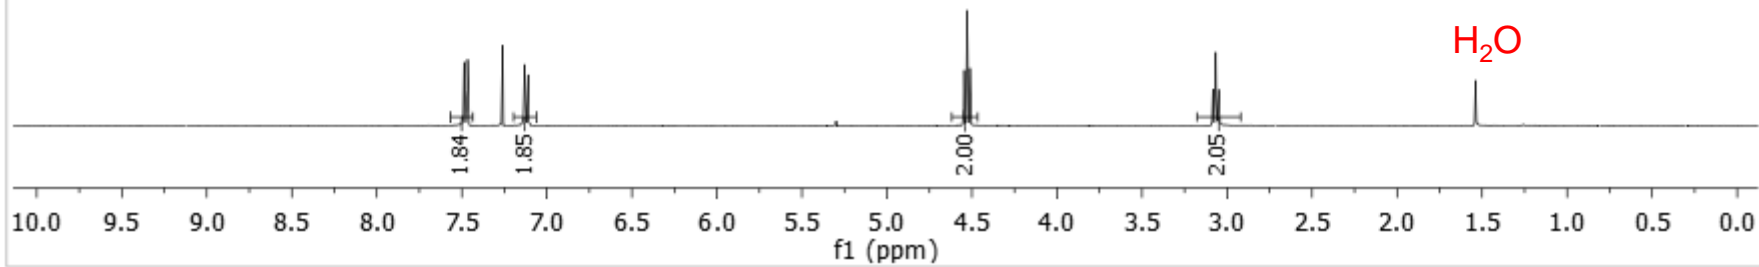

CDCl<sub>3</sub>

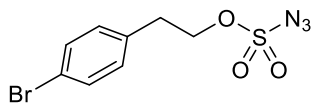

<sup>13</sup>C NMR of **1h**, 62.5 MHz, CDCl<sub>3</sub>

134.55  
131.99  
130.72  
121.33

77.67  
77.16  
76.65  
74.41

34.46

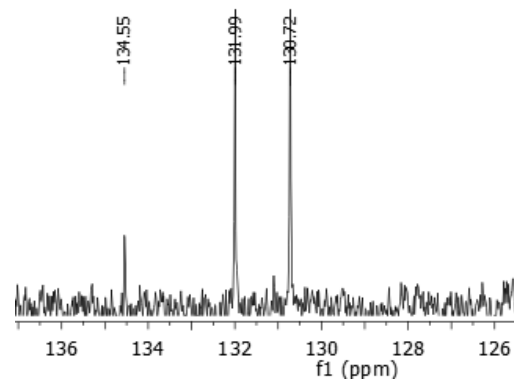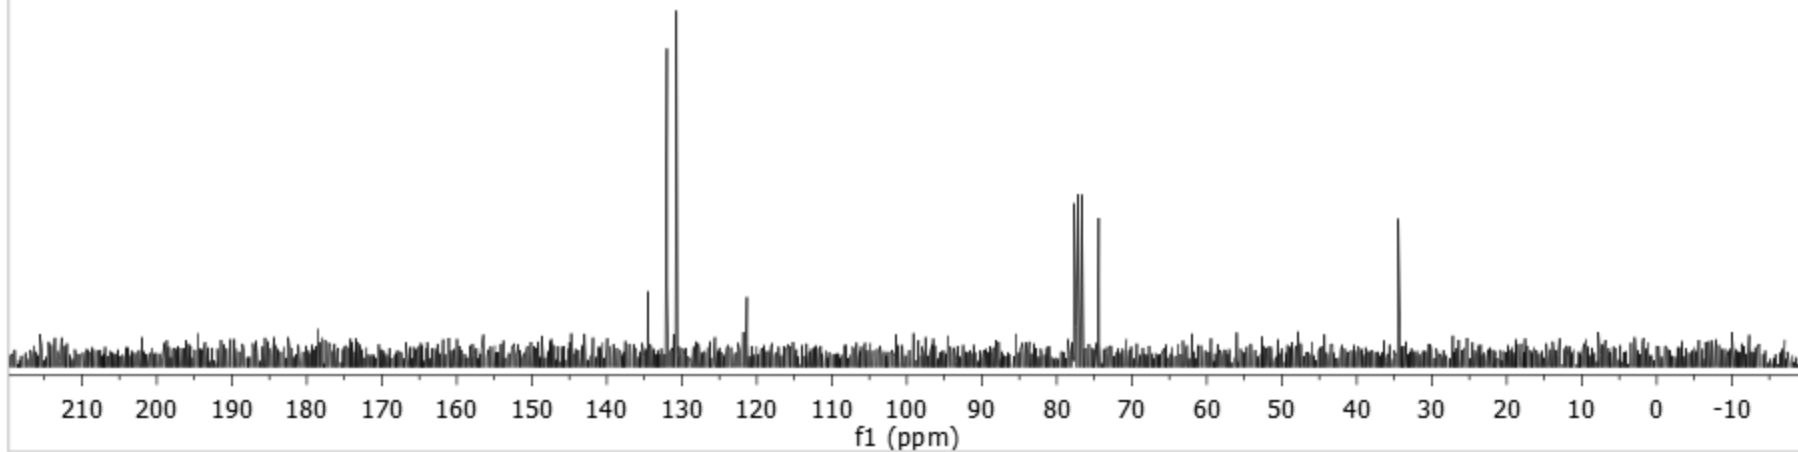

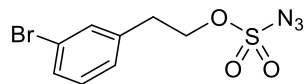

$^1\text{H}$  NMR of **1i**, 600 MHz,  $\text{CDCl}_3$

$\text{CHCl}_3$

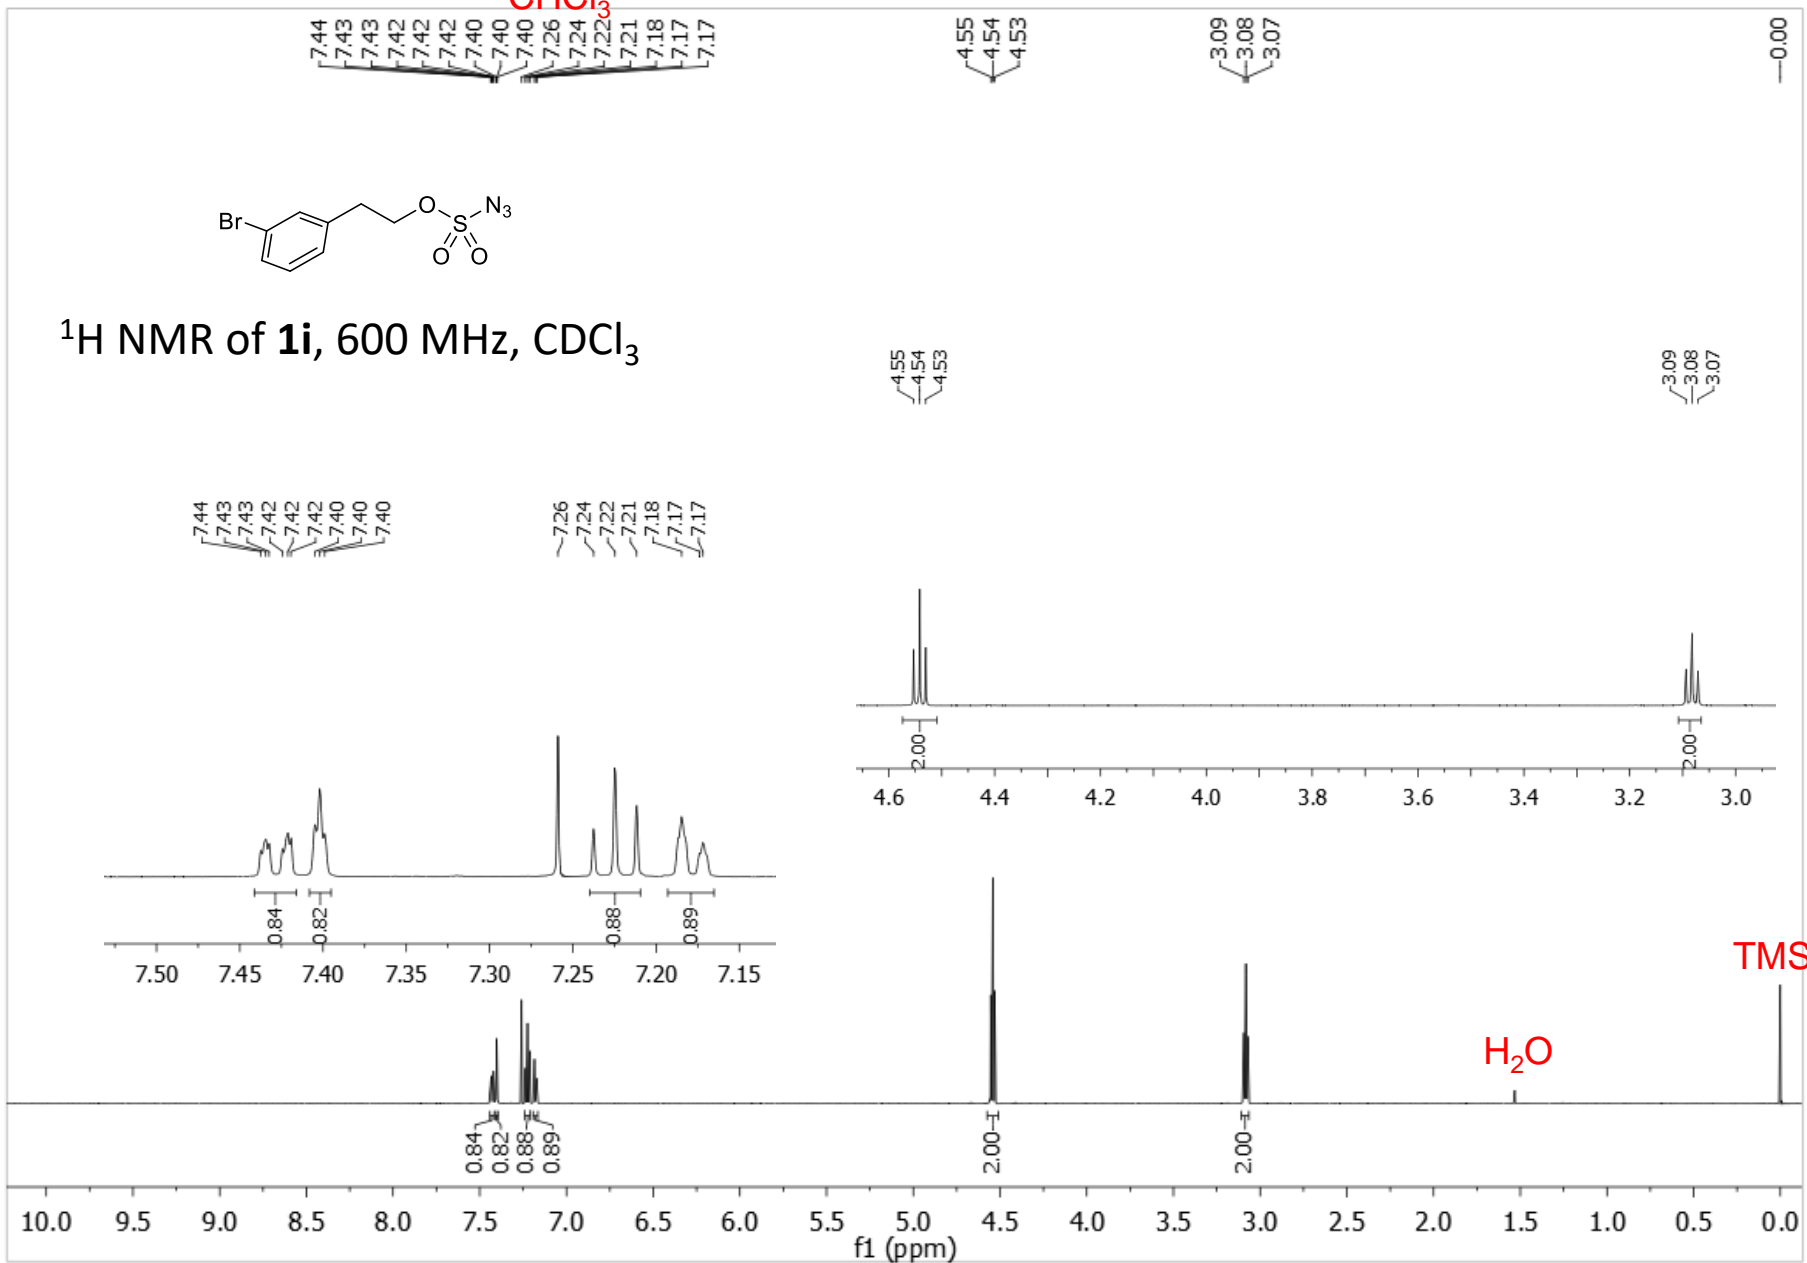

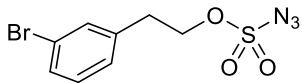

$^{13}\text{C}$  NMR of **1i**, 150 MHz,  $\text{CDCl}_3$

$\text{CDCl}_3$

137.83  
132.09  
130.71  
130.58  
127.73  
123.01

77.37  
77.16  
76.95  
74.33

34.80

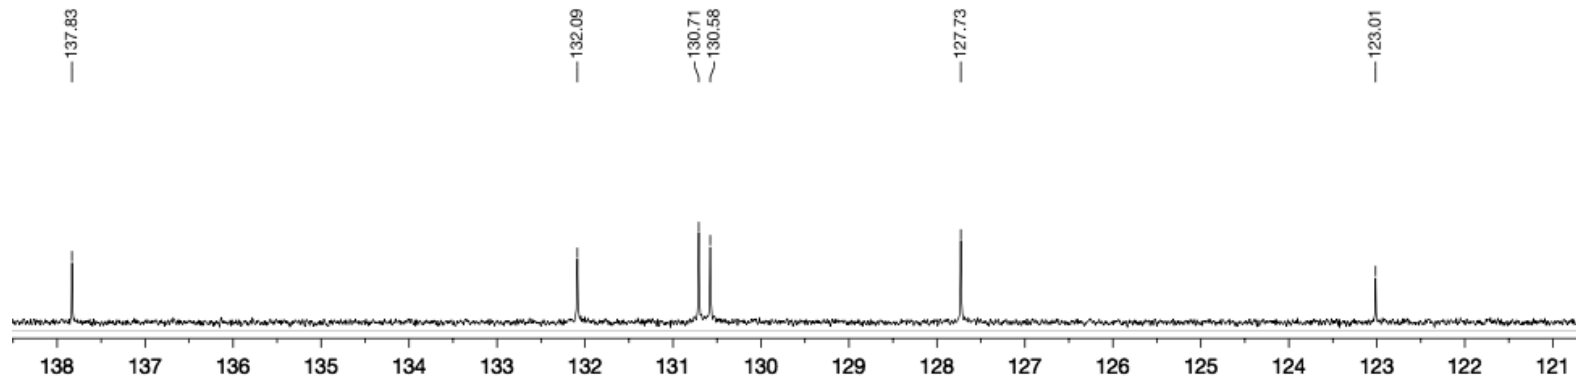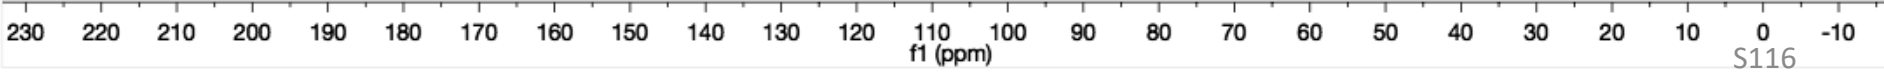

CHCl<sub>3</sub>

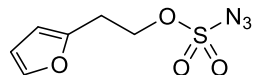

<sup>1</sup>H NMR of **1j**, 400 MHz, CDCl<sub>3</sub>

7.35  
7.34  
7.24  
6.32  
6.31  
6.31  
6.31  
6.17  
6.16  
4.58  
4.57  
4.55  
3.15  
3.13  
3.12

4.58  
4.57  
4.55

3.15  
3.13  
3.12

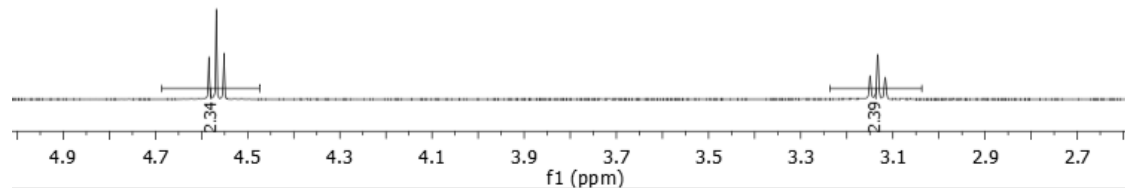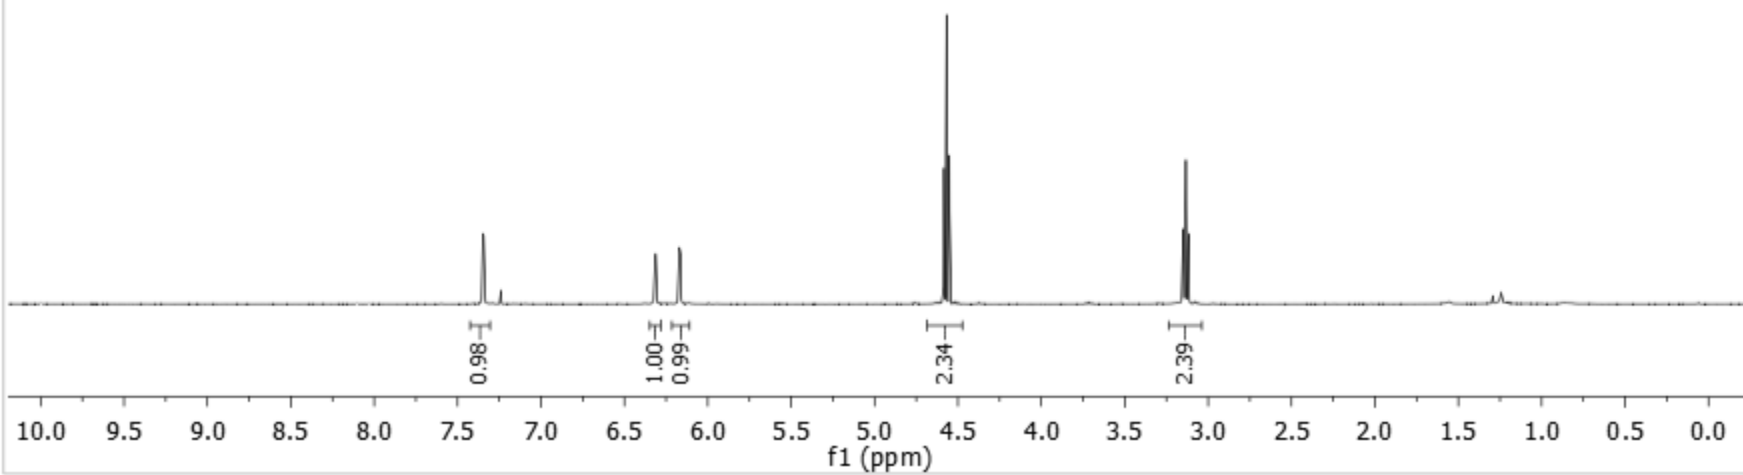

CDCl<sub>3</sub>

149.26

142.15

110.52

107.61

77.34

77.02

76.70

72.06

27.77

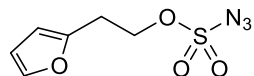

<sup>13</sup>C NMR of **1j**, 100 MHz, CDCl<sub>3</sub>

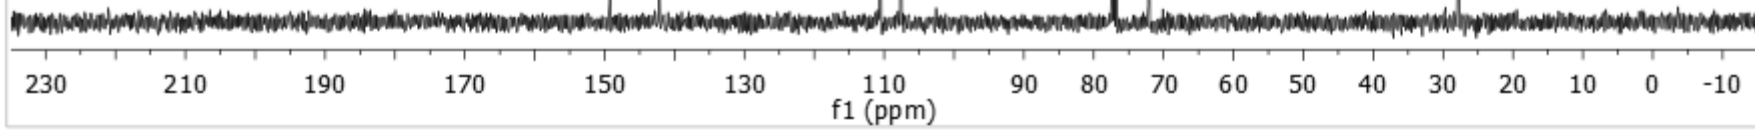

CHCl<sub>3</sub>

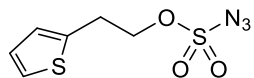

<sup>1</sup>H NMR of **1k**, 250MHz, CDCl<sub>3</sub>

7.29  
7.27  
7.26  
7.25  
7.24  
7.03  
7.02  
7.01  
7.00  
6.97  
6.96  
6.95

4.61  
4.58  
4.56

3.39  
3.39  
3.36  
3.36  
3.34  
3.33

4.61  
4.58  
4.56

3.39  
3.39  
3.36  
3.36  
3.34  
3.33

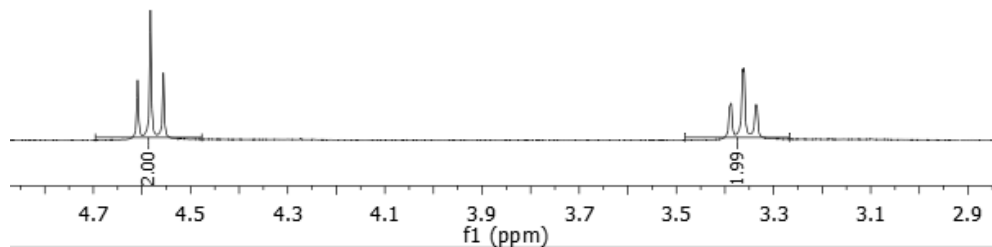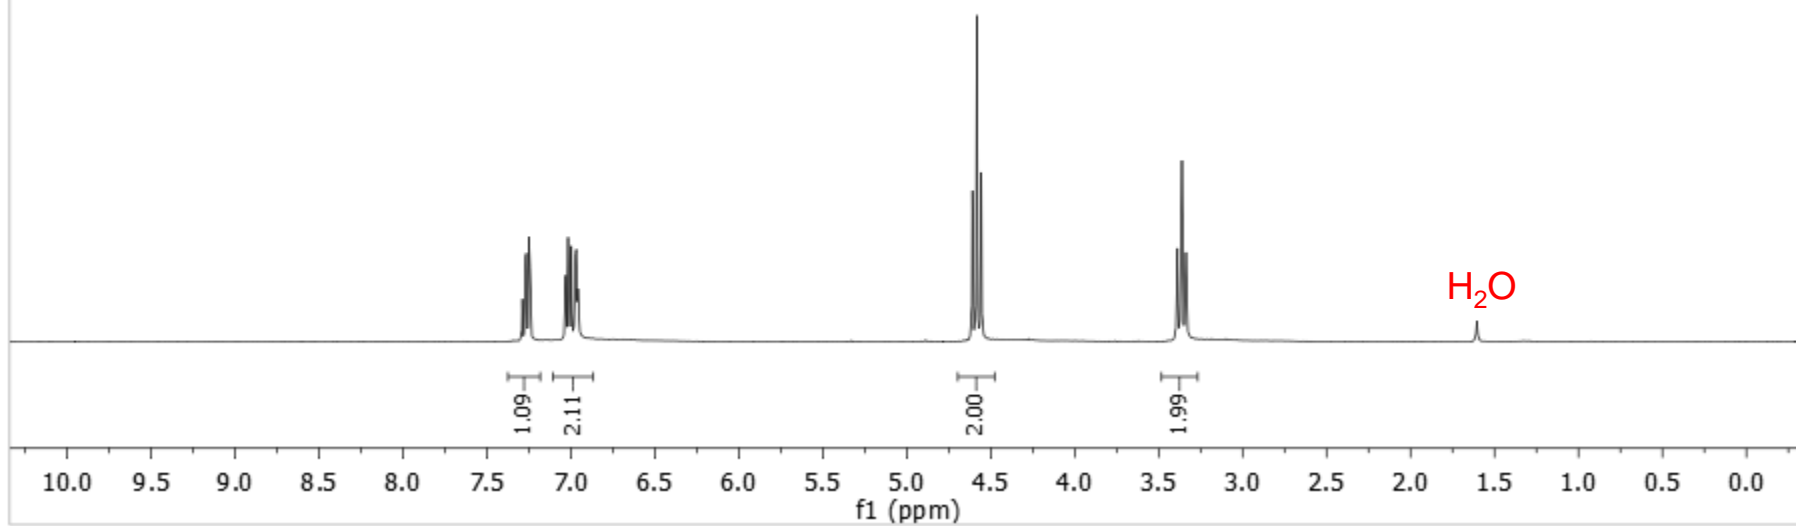



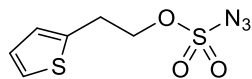

$^{13}\text{C}$  NMR of **1k**, 62.5MHz,  $\text{CDCl}_3$

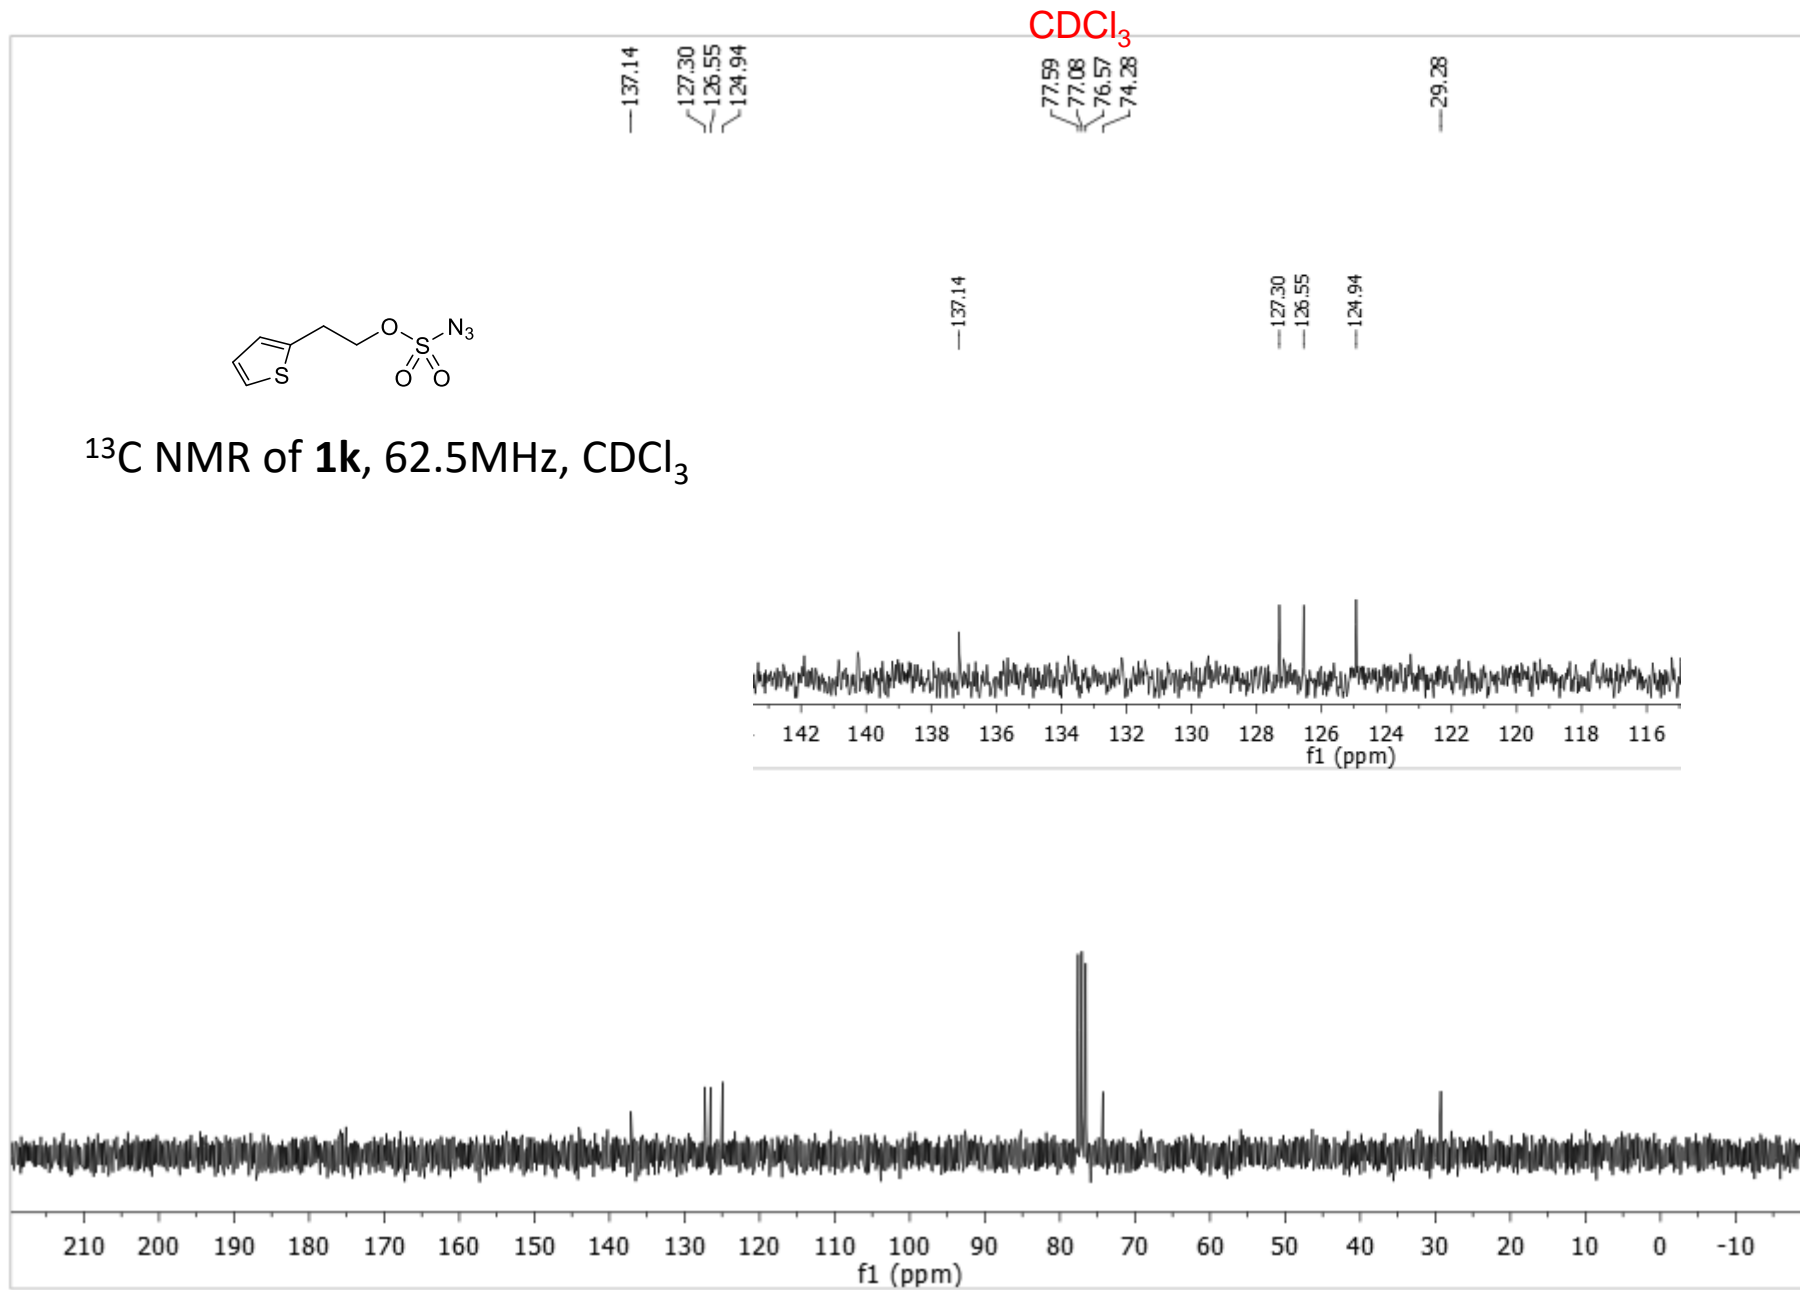

CHCl<sub>3</sub>

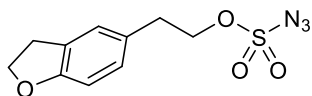

<sup>1</sup>H NMR of **1I**, 600 MHz, CDCl<sub>3</sub>

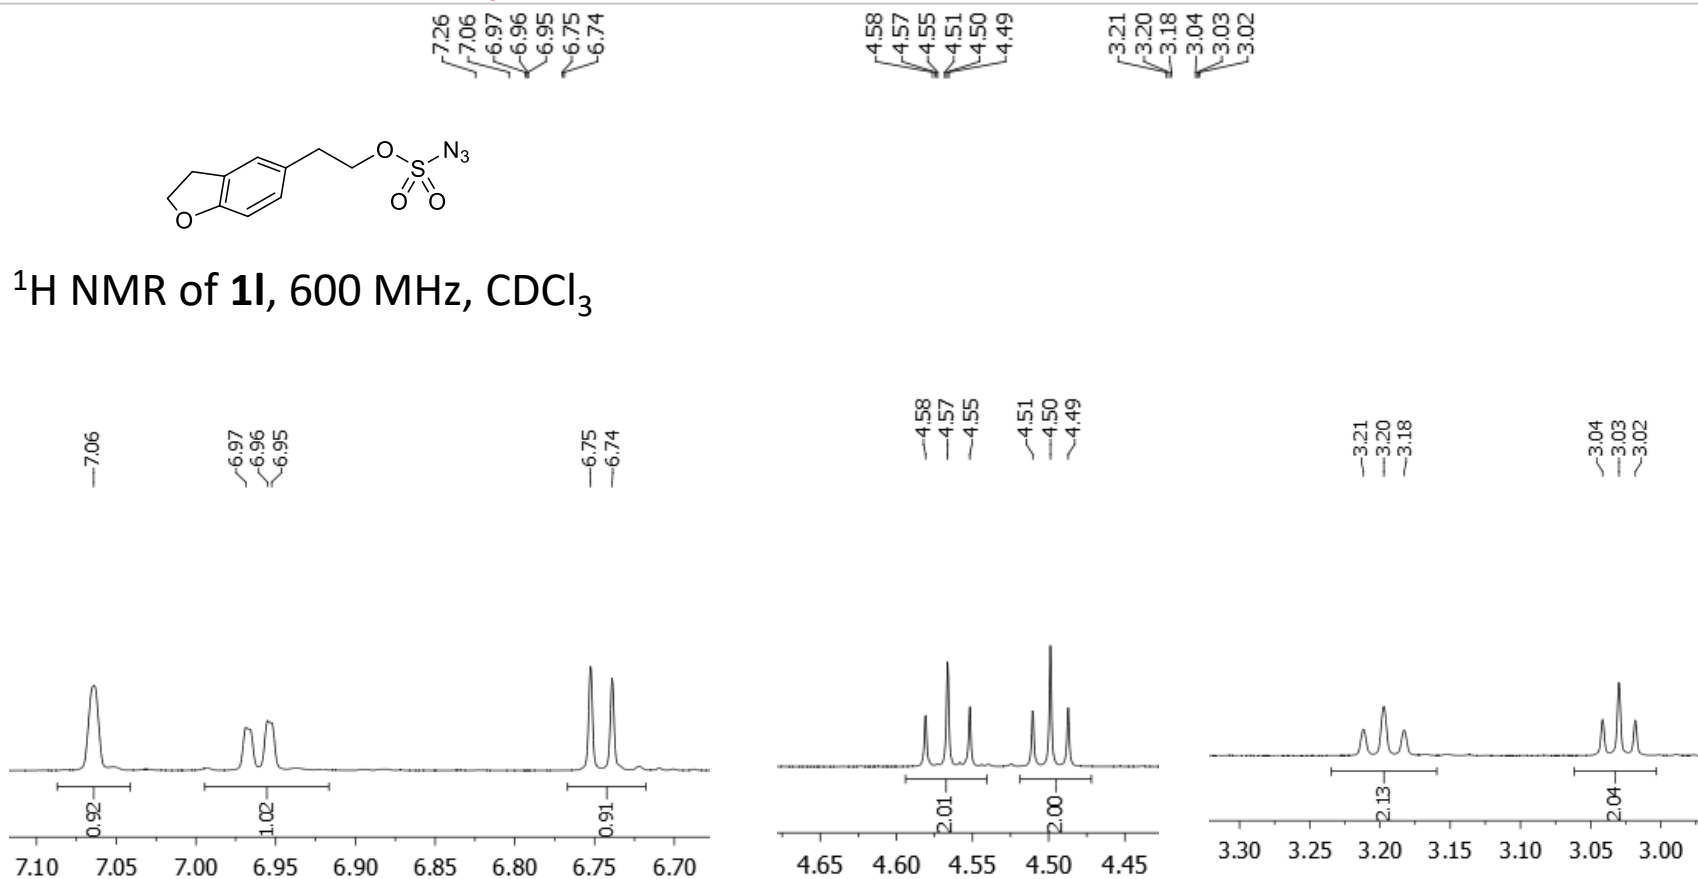

0.92  
1.02  
0.91

2.01  
2.00

2.13  
2.04

10.0 9.5 9.0 8.5 8.0 7.5 7.0 6.5 6.0 5.5 5.0 4.5 4.0 3.5 3.0 2.5 2.0 1.5 1.0 0.5 0.0

f1 (ppm)

TMS

S121

CDCl<sub>3</sub>



<sup>13</sup>C NMR of **1**, 150 MHz, CDCl<sub>3</sub>

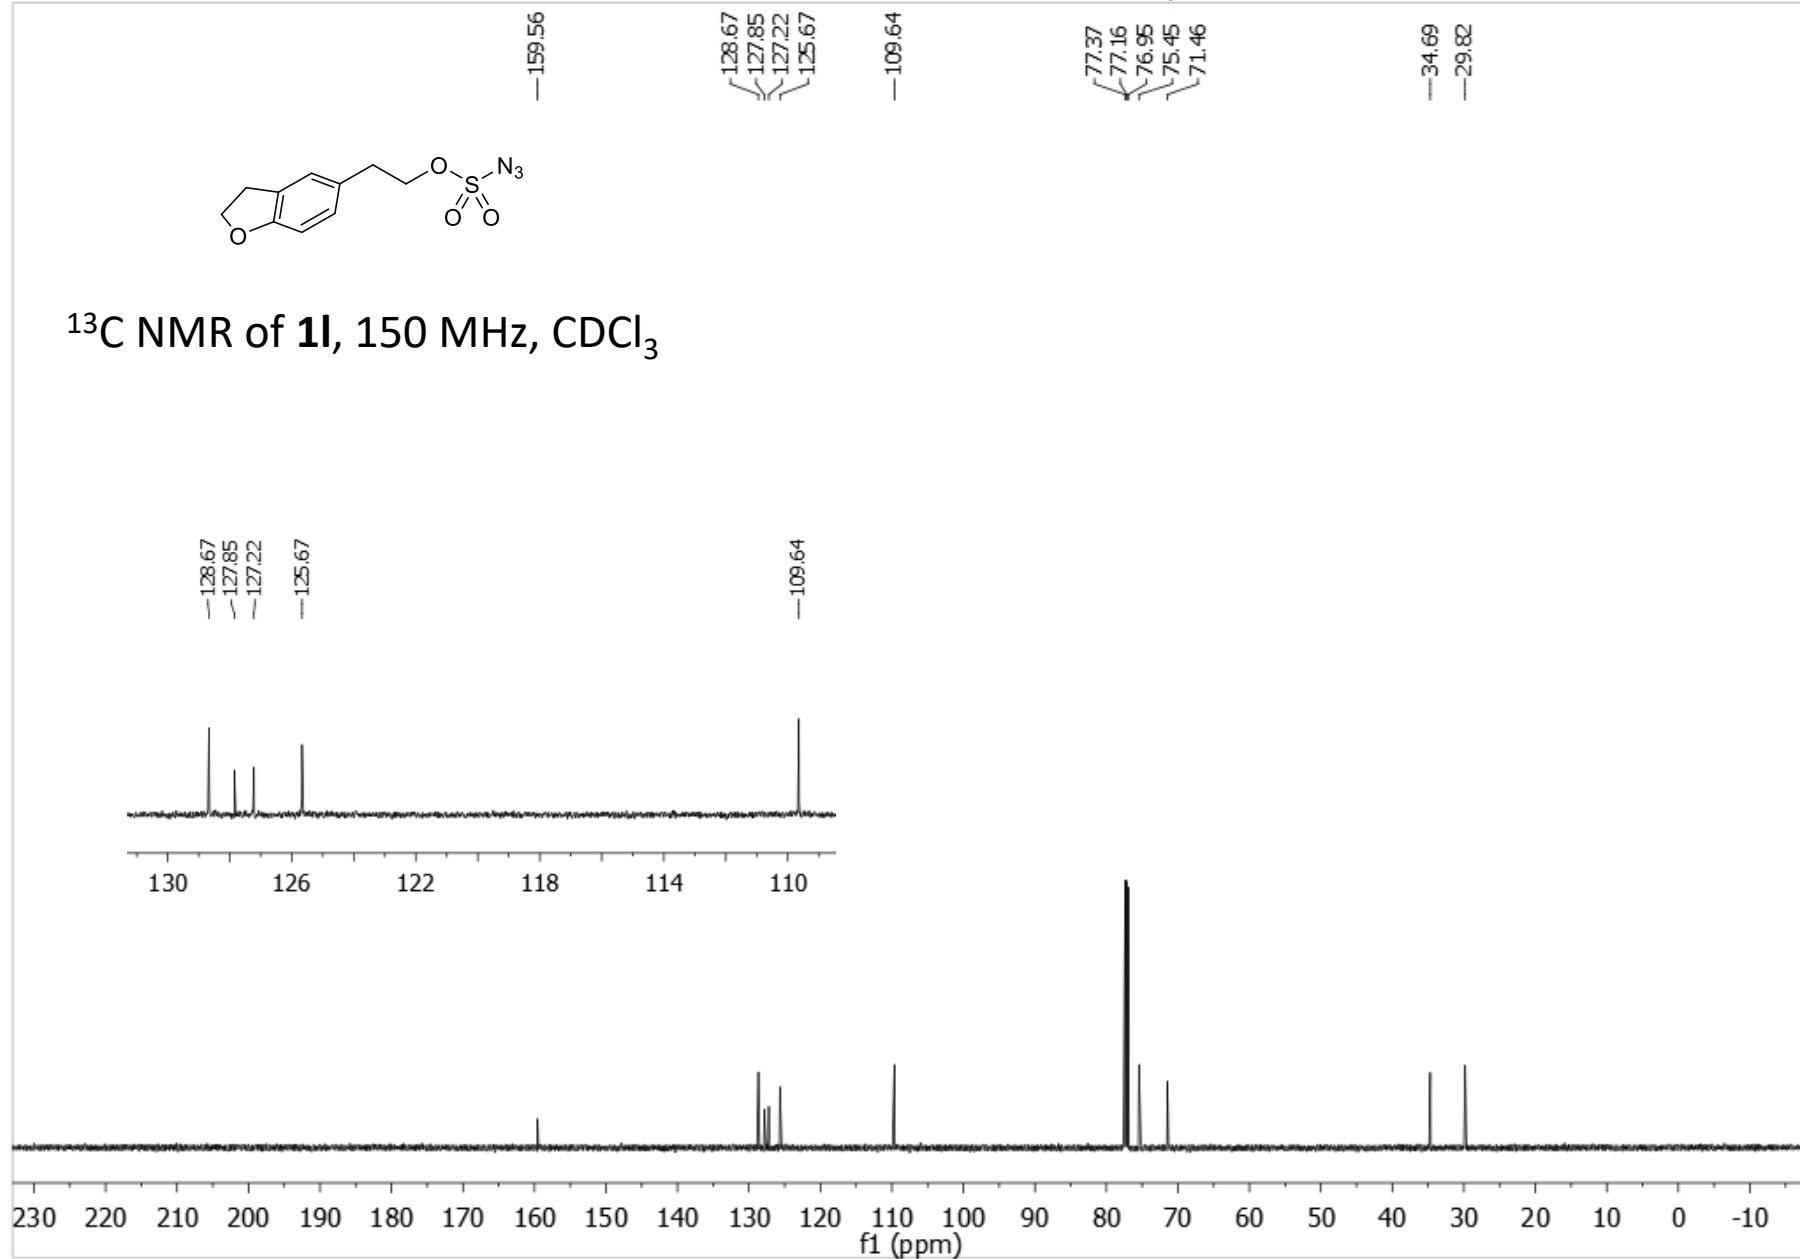

CHCl<sub>3</sub>

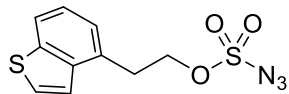

<sup>1</sup>H NMR of **1m**, 600 MHz, CDCl<sub>3</sub>

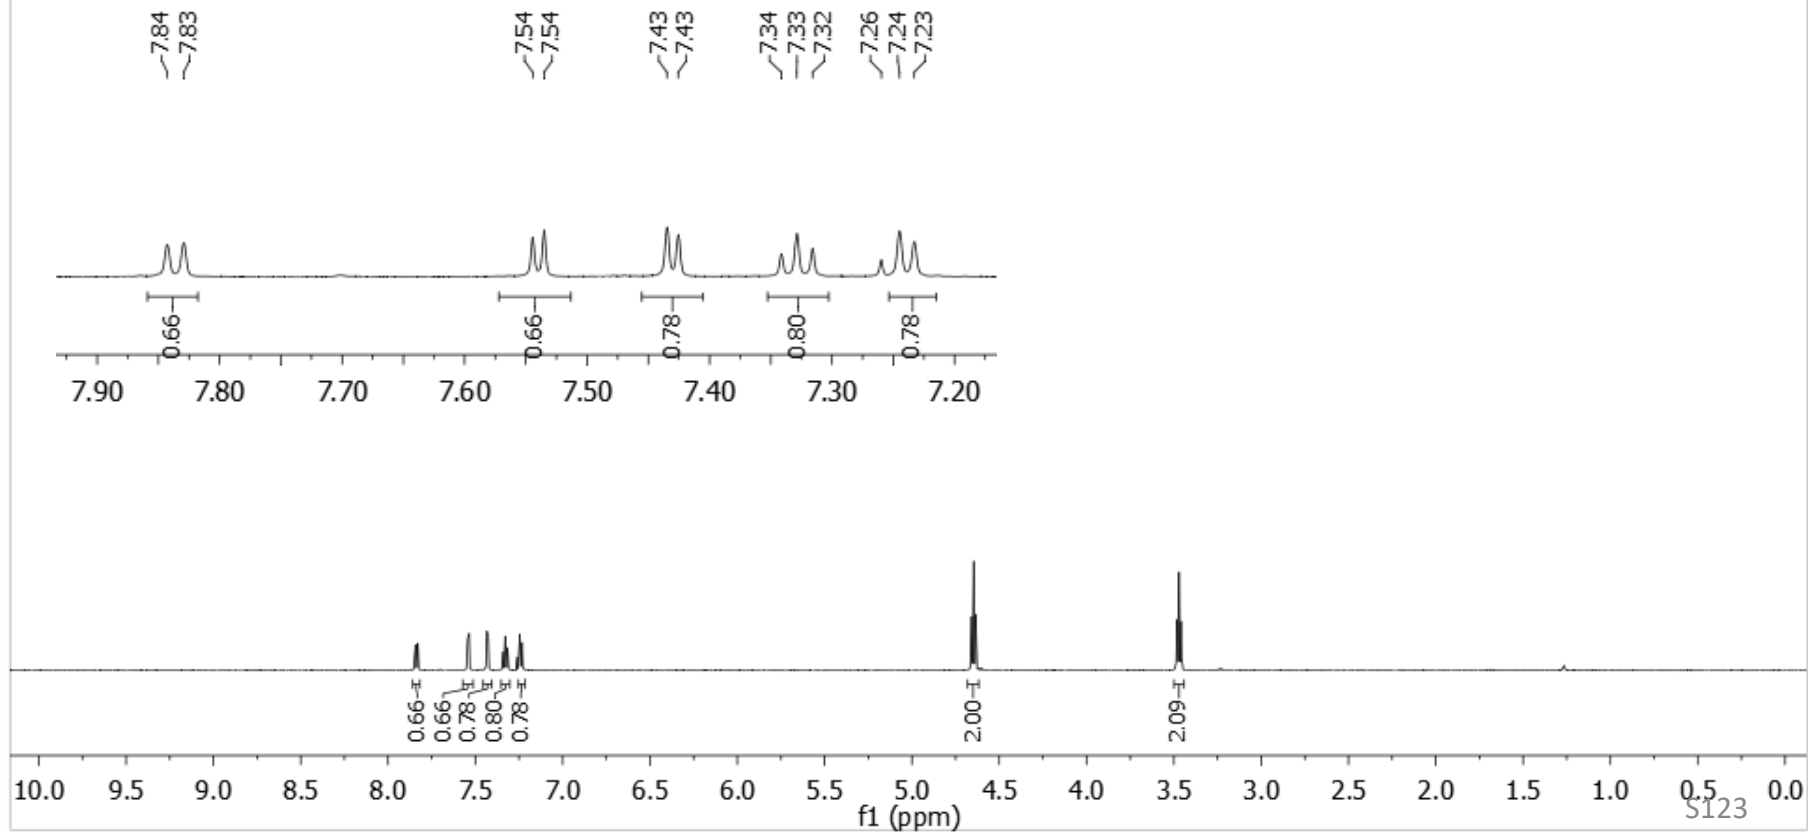

k01-607-C13-2

CDCl<sub>3</sub>

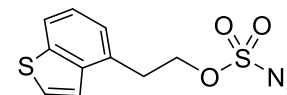

<sup>13</sup>C NMR of **1m**, 150 MHz, CDCl<sub>3</sub>

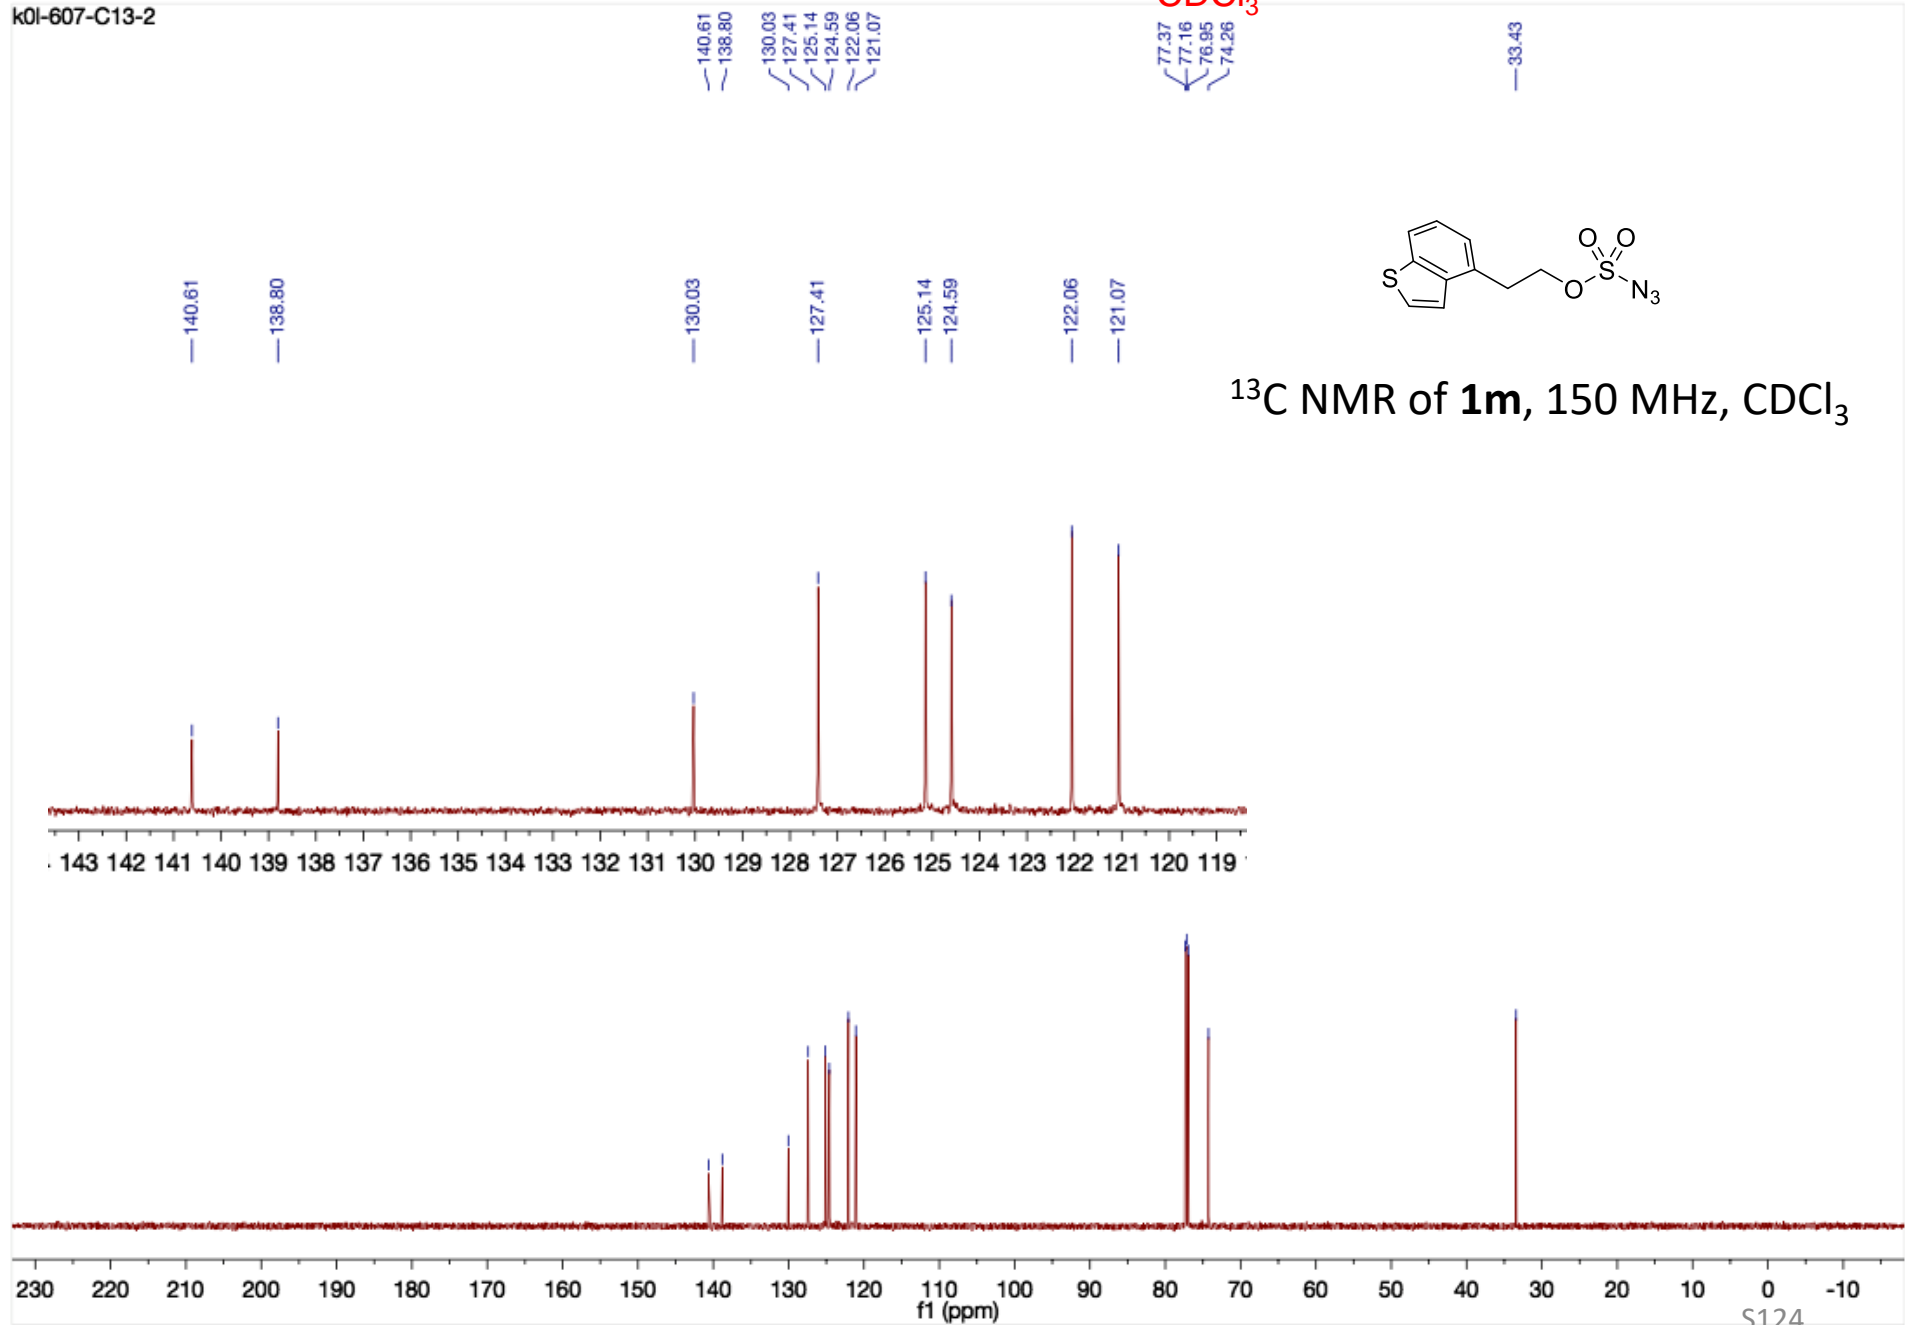

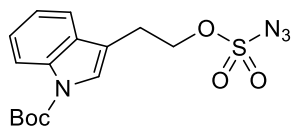

$^1\text{H}$  NMR of **1n**, 400 MHz,  $\text{CDCl}_3$

$\text{CHCl}_3$

7.260

1.682

4.641

4.623

4.606

3.244

3.242

3.227

3.224

3.209

3.207

8.15

8.13

7.52

7.52

7.50

7.50

7.36

7.36

7.32

7.32

7.29

7.28

7.27

7.26

7.25

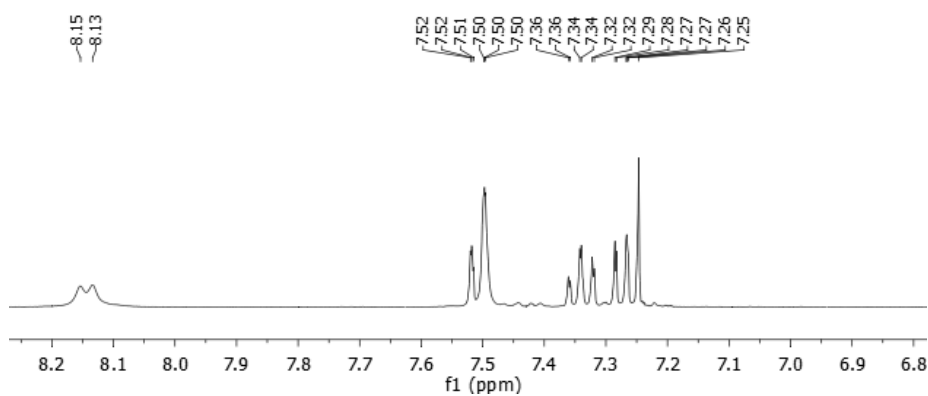

0.75

1.84

1.90

1.02

1.92

2.00

9.92

ppm (f1)

S125

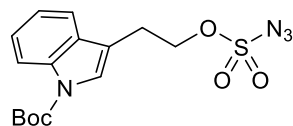

$^{13}\text{C}$  NMR of **1n**, 100 MHz,  $\text{CDCl}_3$

149.459  
135.470  
129.690  
124.774  
124.000  
122.750  
118.415  
115.456  
114.199  
83.891  
73.433  
28.162  
24.758

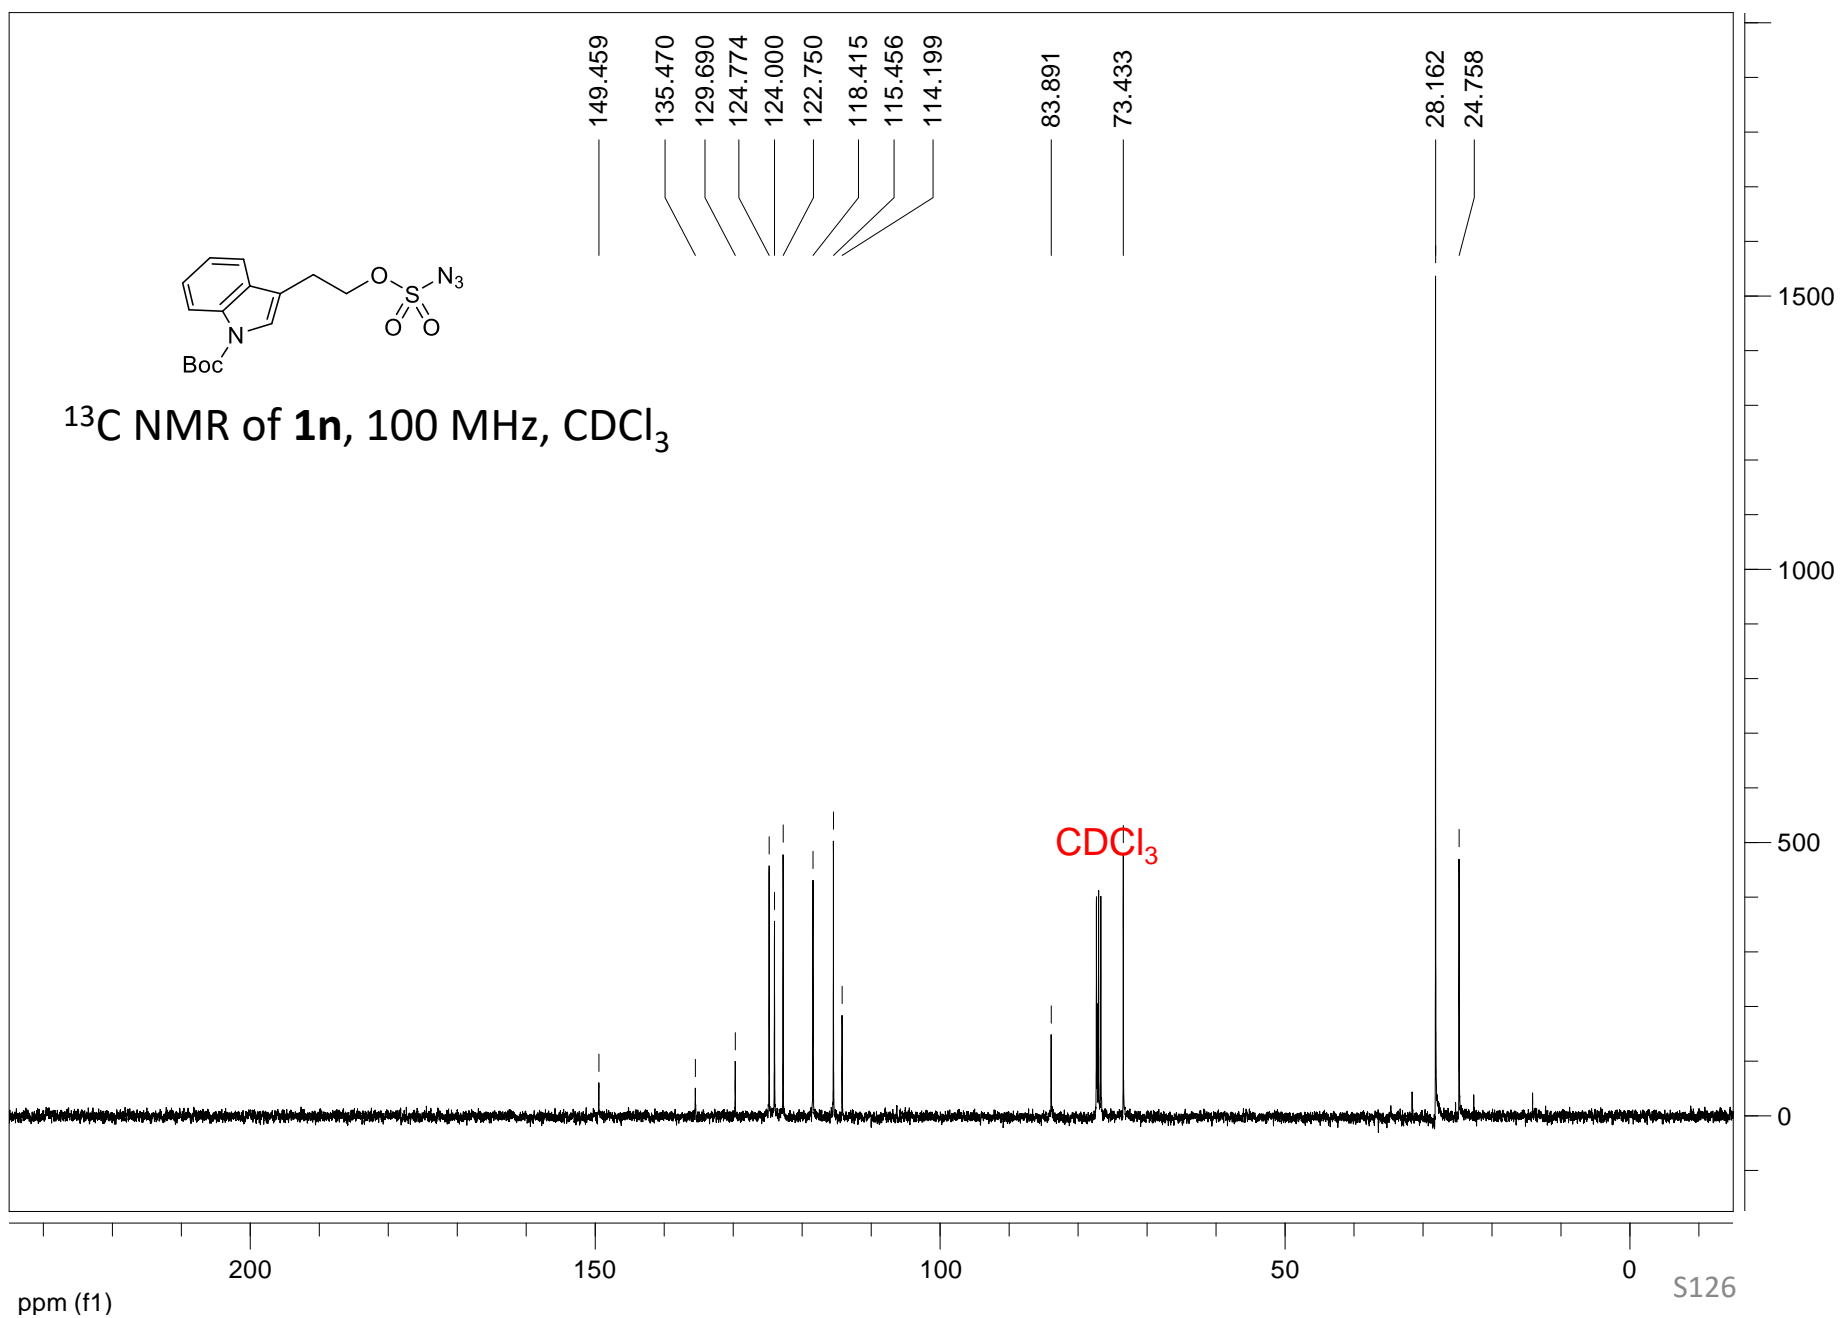

CHCl<sub>3</sub>

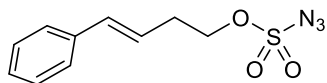

<sup>1</sup>H NMR of **1o**, 600 MHz, CDCl<sub>3</sub>

7.36  
7.35  
7.33  
7.32  
7.30  
7.26  
7.25  
7.25  
7.23  
6.56  
6.53  
6.17  
6.15  
6.14  
6.13  
6.12

4.49  
4.47  
4.46

2.74  
2.73  
2.72  
2.71

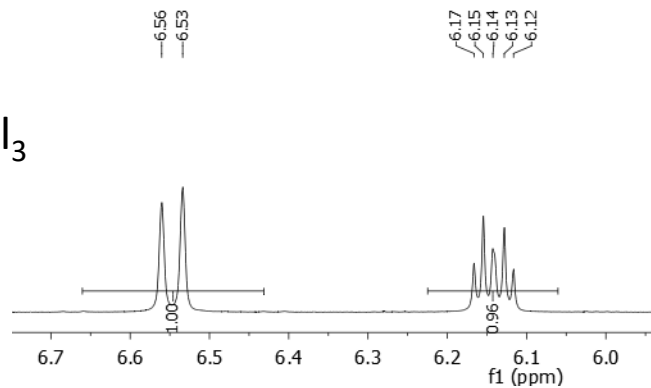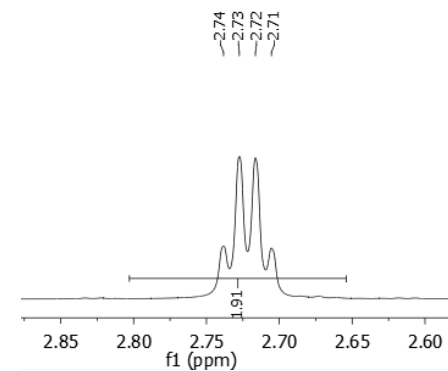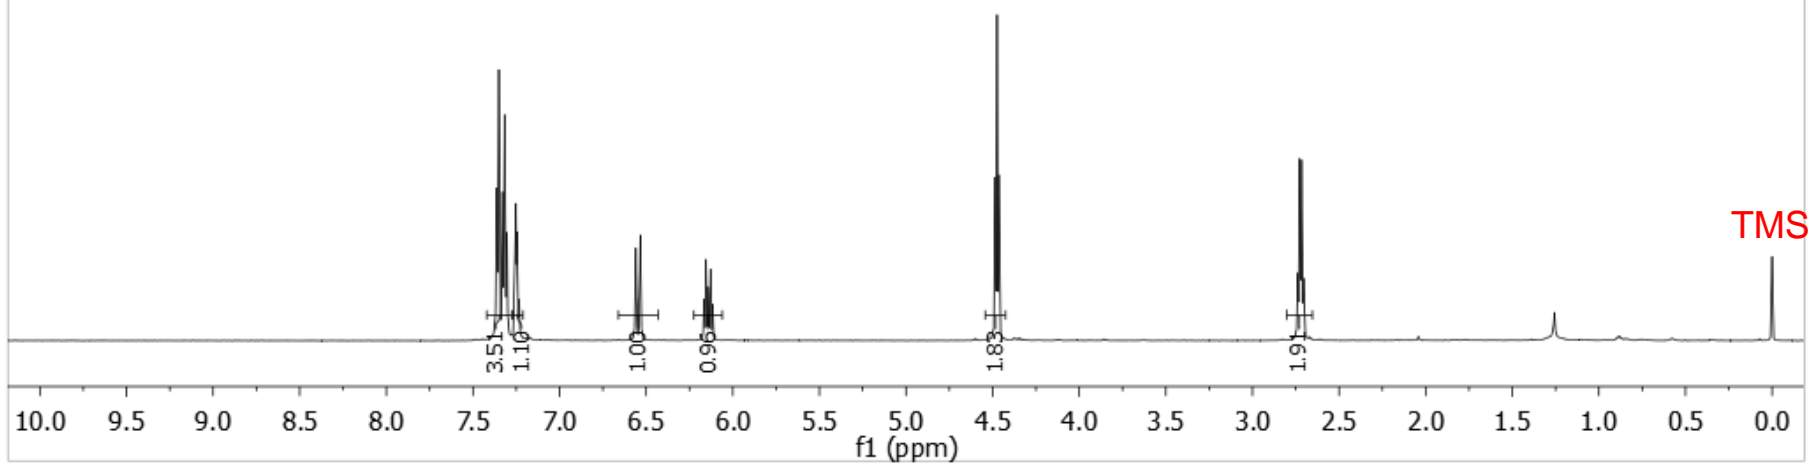





$^{13}\text{C}$  NMR of **1o**, 62.5 MHz,  $\text{CDCl}_3$

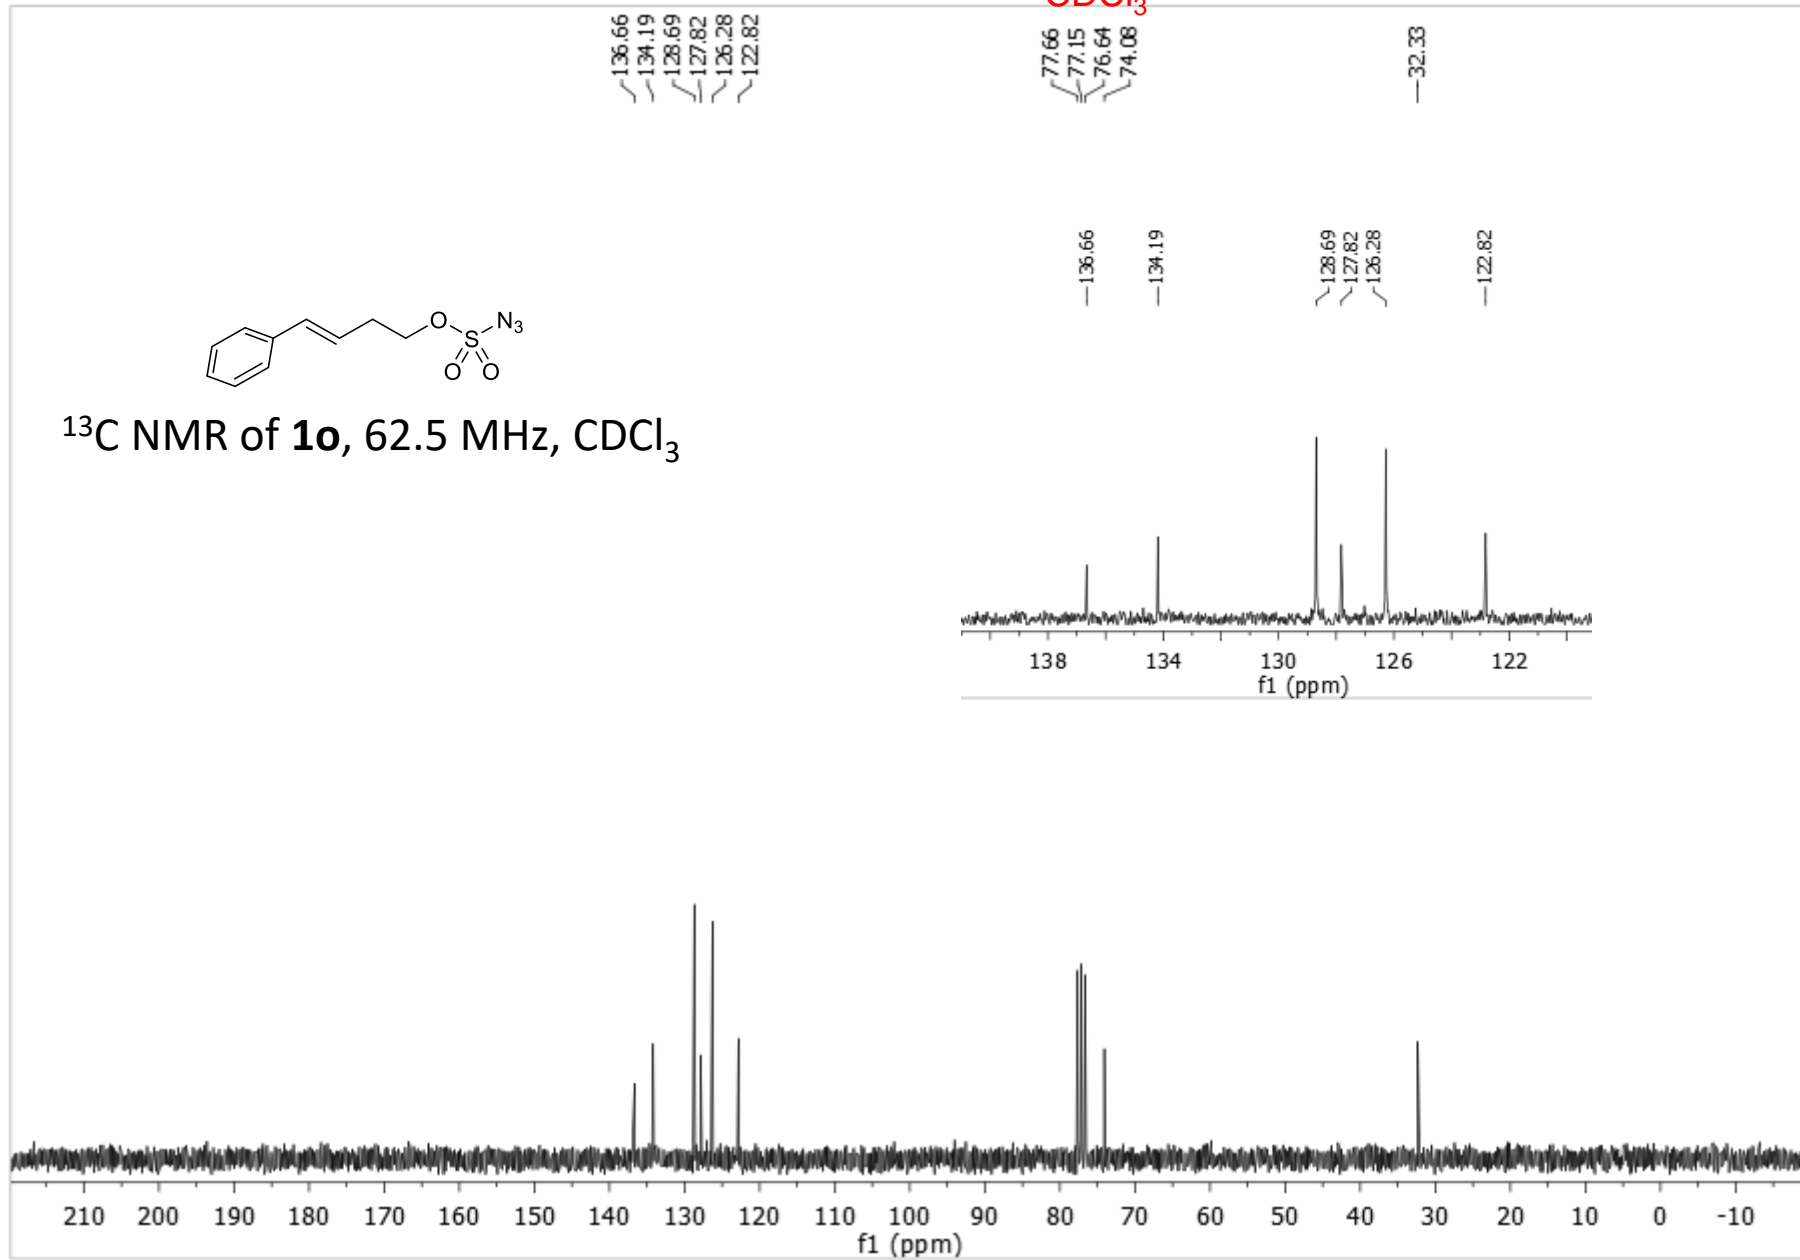

CHCl<sub>3</sub>

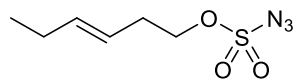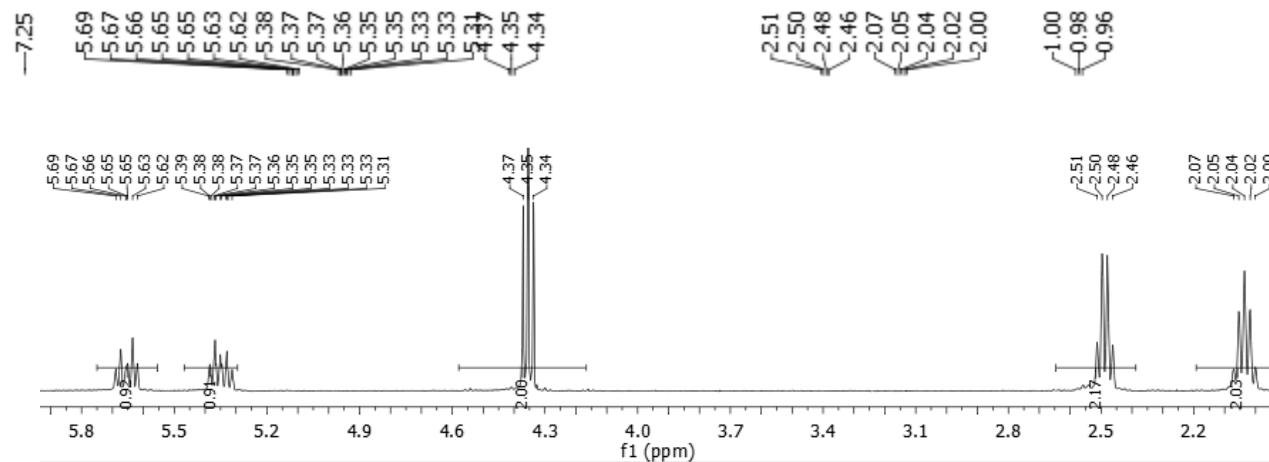

<sup>1</sup>H NMR of **1p**, 400 MHz, CDCl<sub>3</sub>

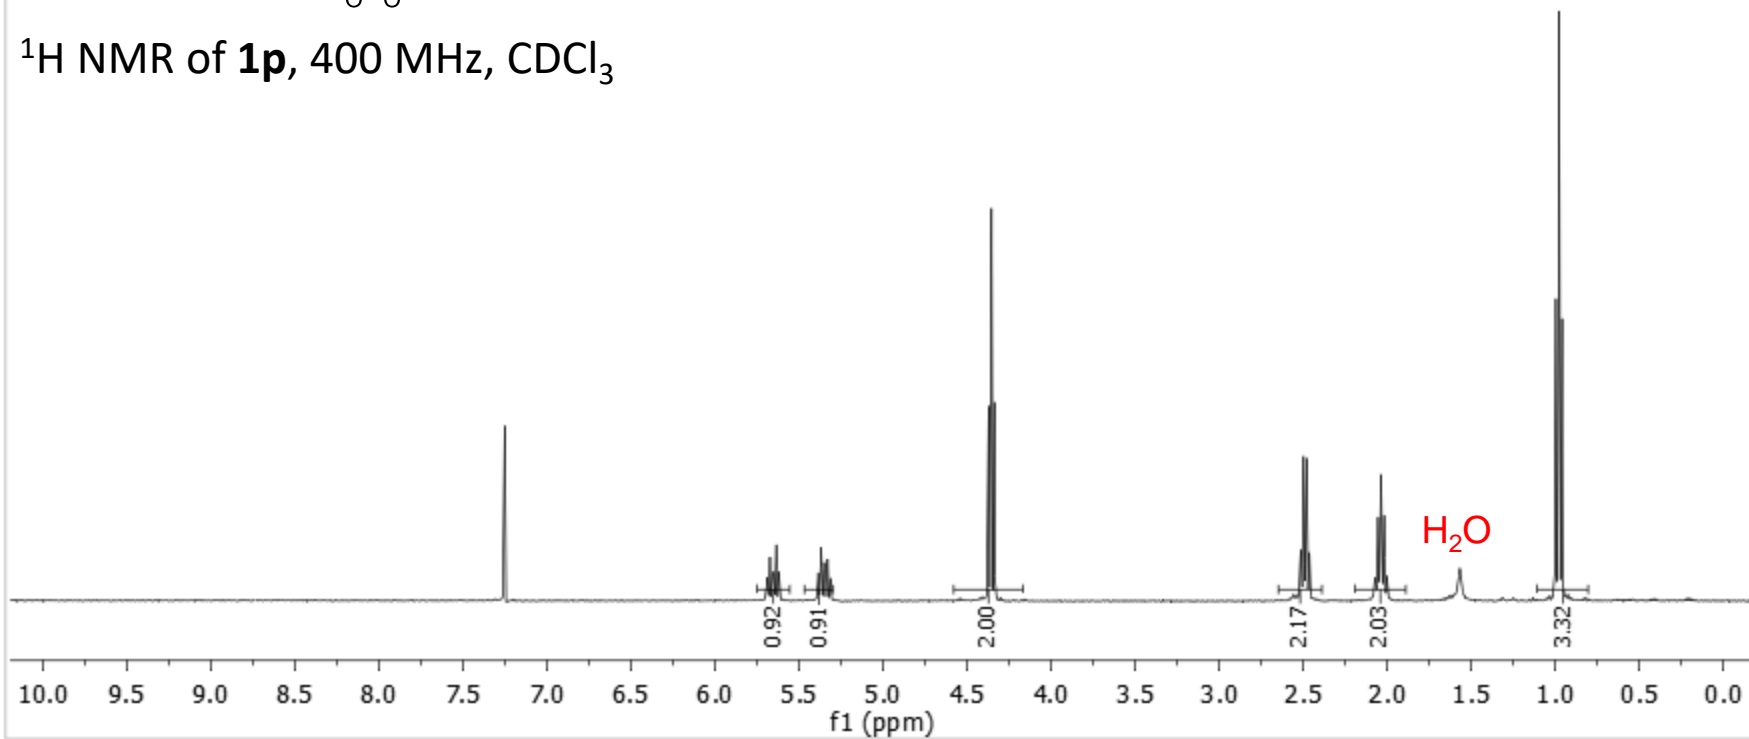

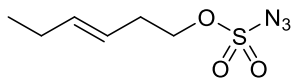

$^{13}\text{C}$  NMR of **1p**, 100 MHz,  $\text{CDCl}_3$

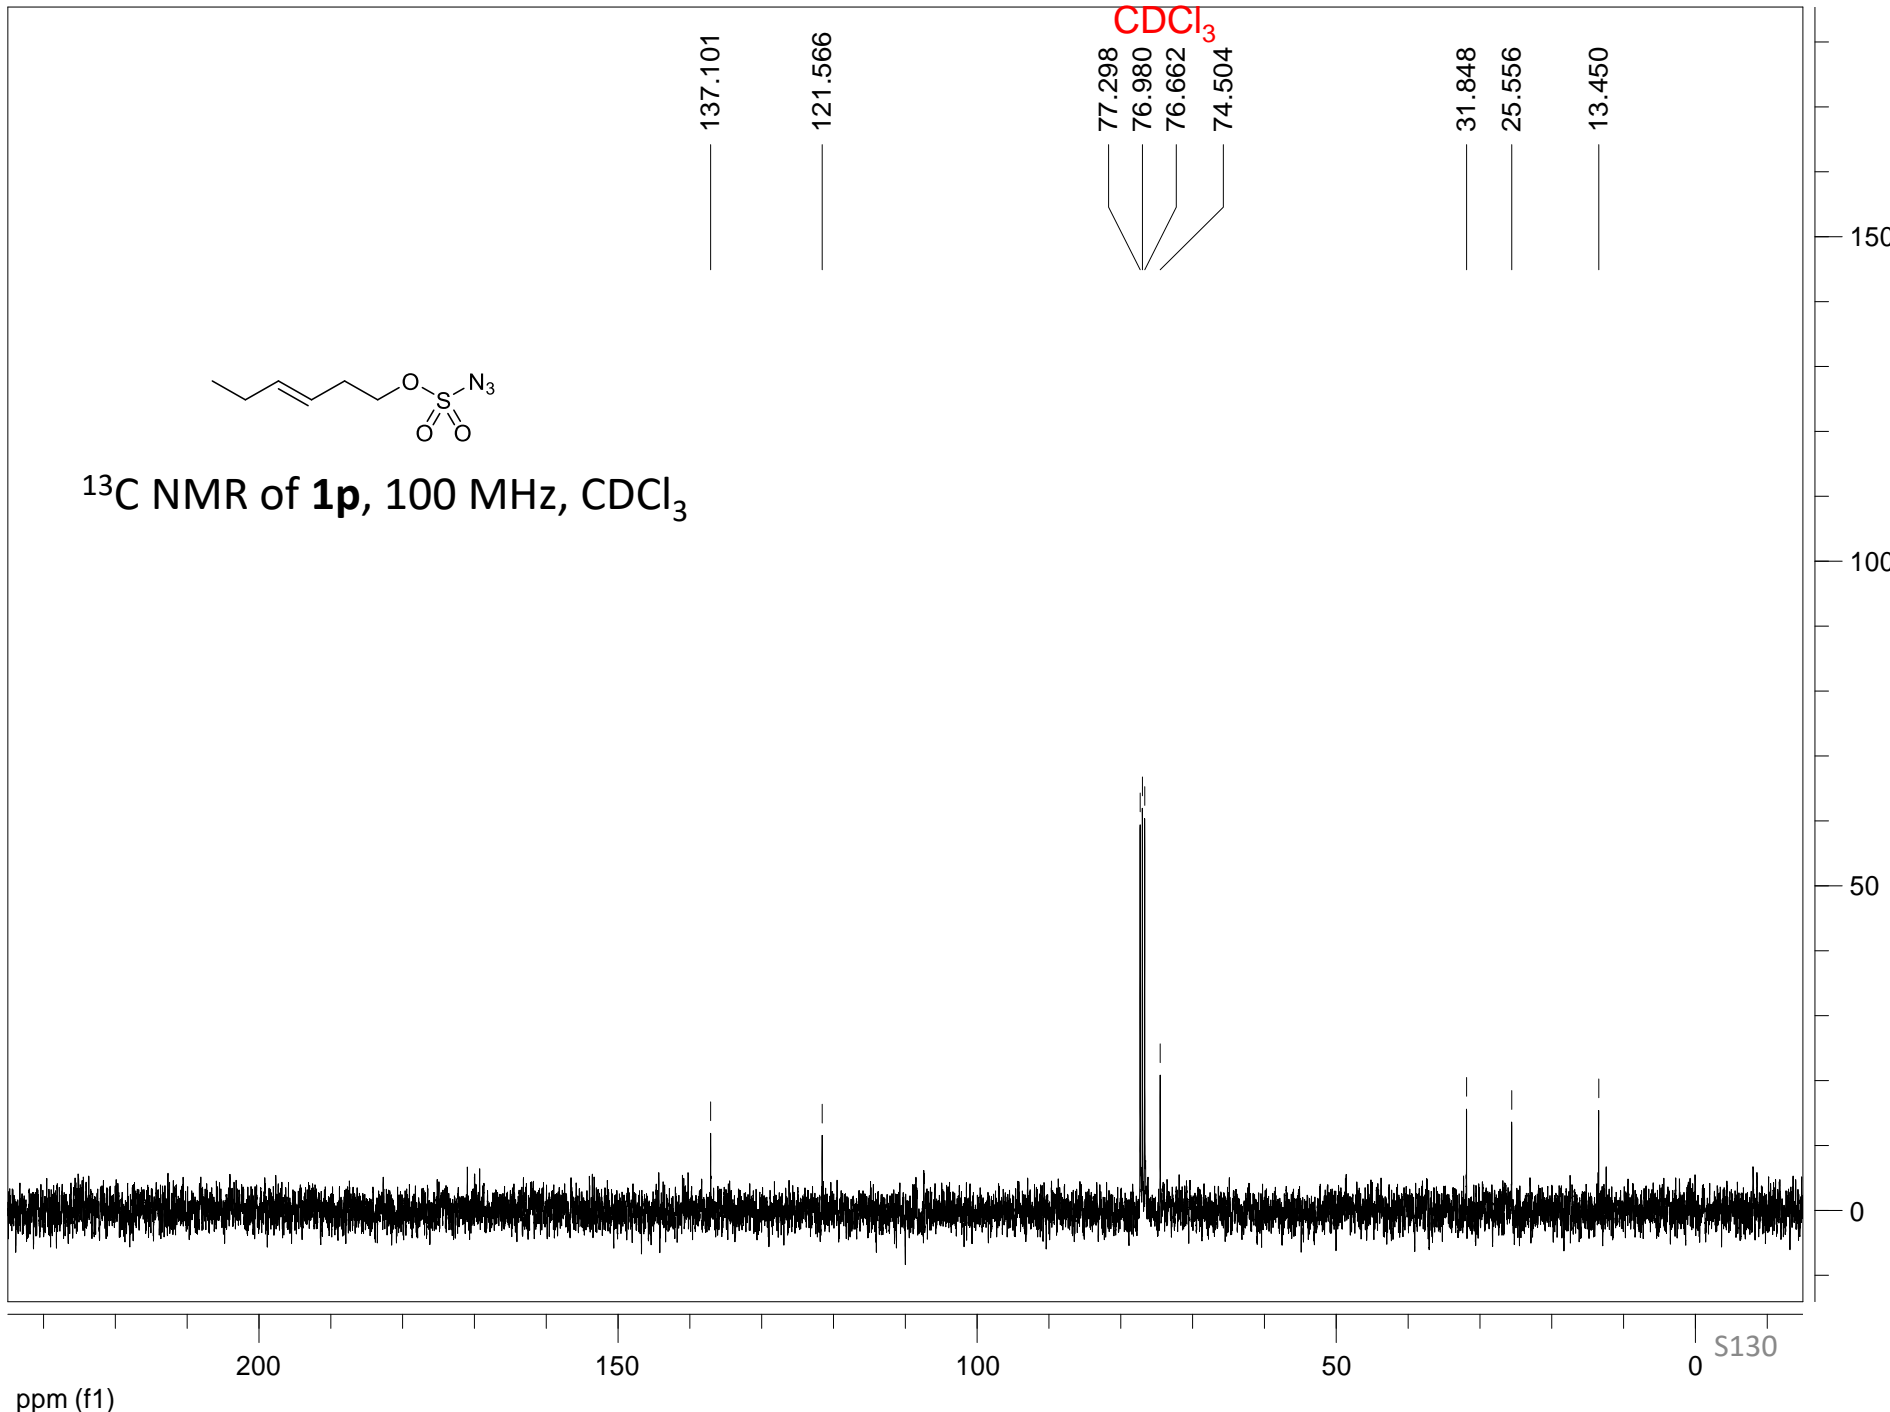

CHCl<sub>3</sub>

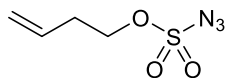

<sup>1</sup>H NMR of **1q**, 400 MHz, CDCl<sub>3</sub>

Product is volatile

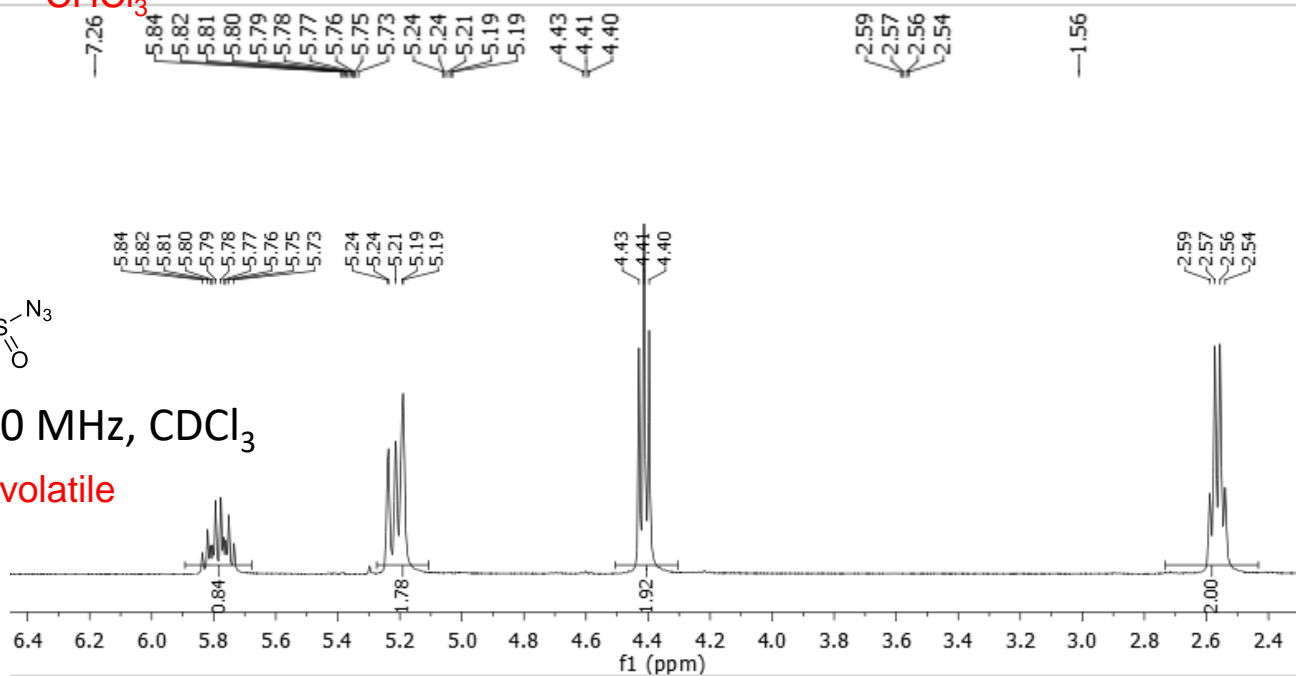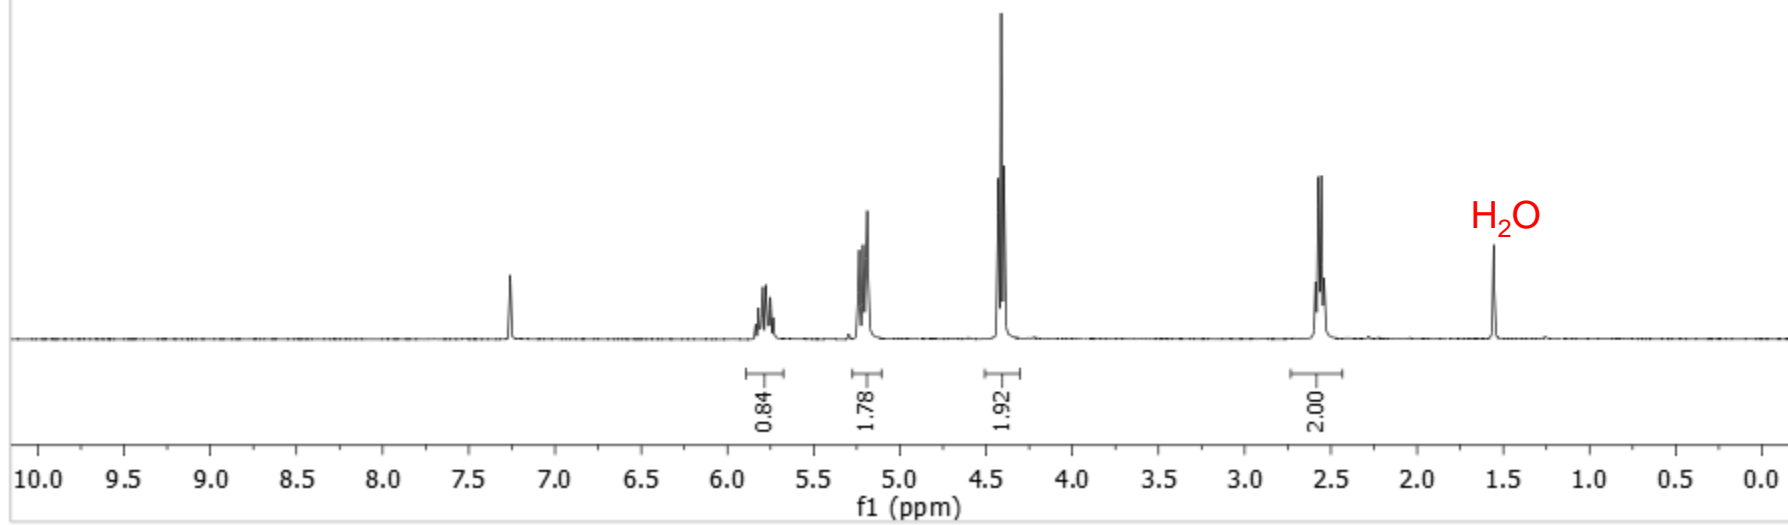

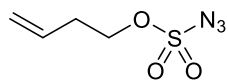

$^{13}\text{C}$  NMR of **1q**, 100 MHz,  $\text{CDCl}_3$

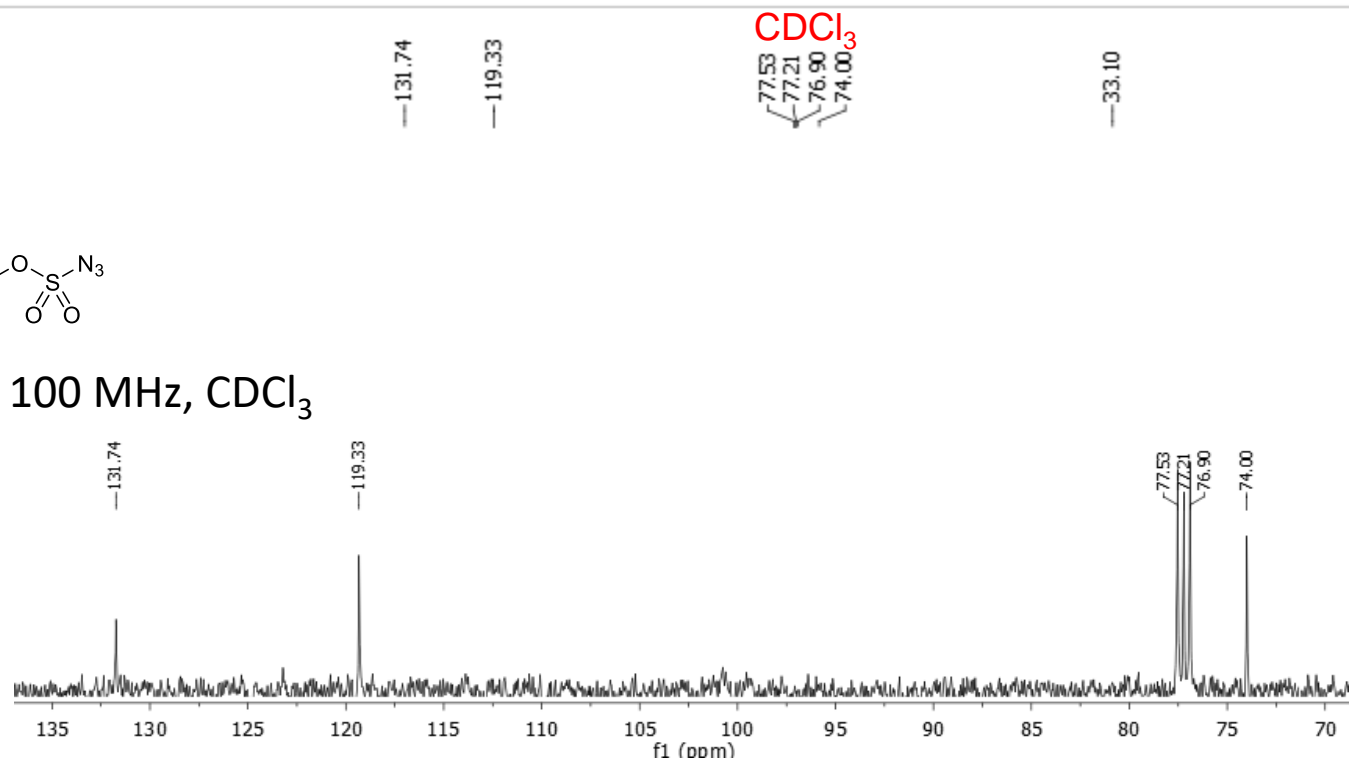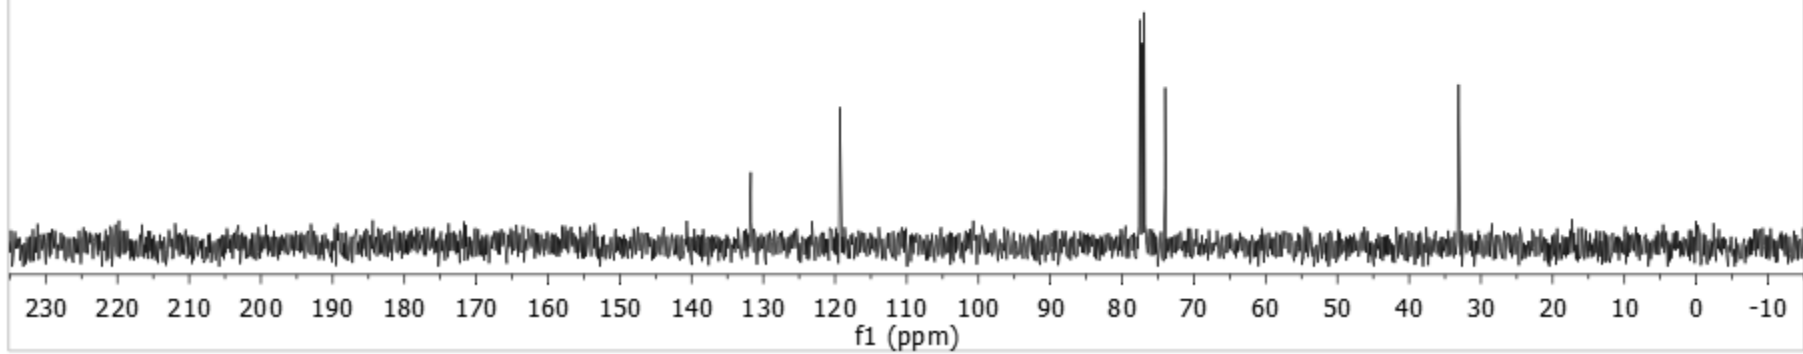

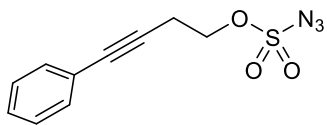

<sup>1</sup>H NMR of **1r**, 400 MHz, CDCl<sub>3</sub>

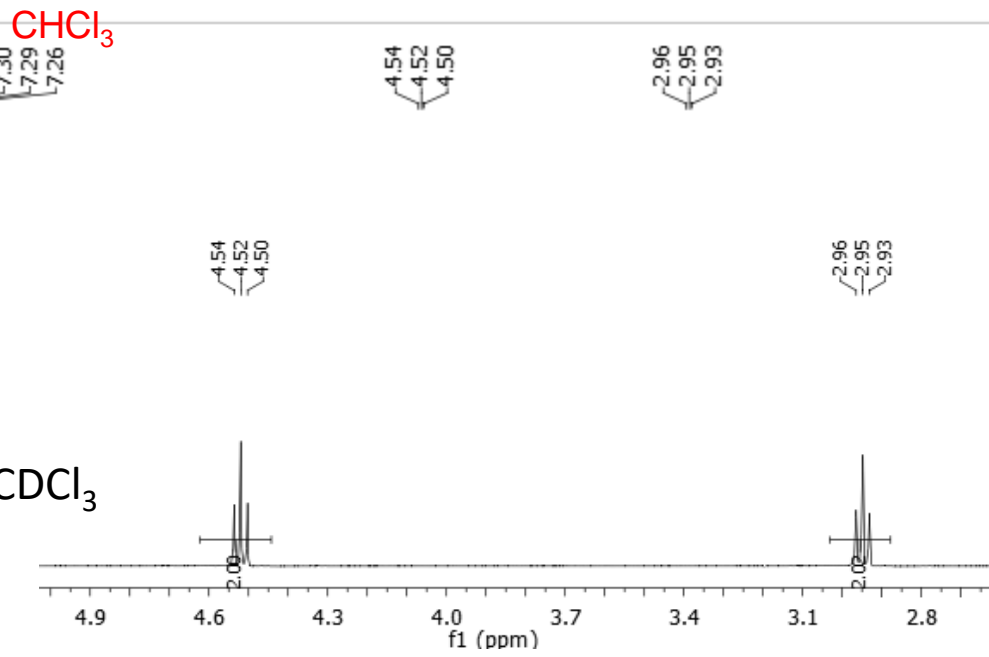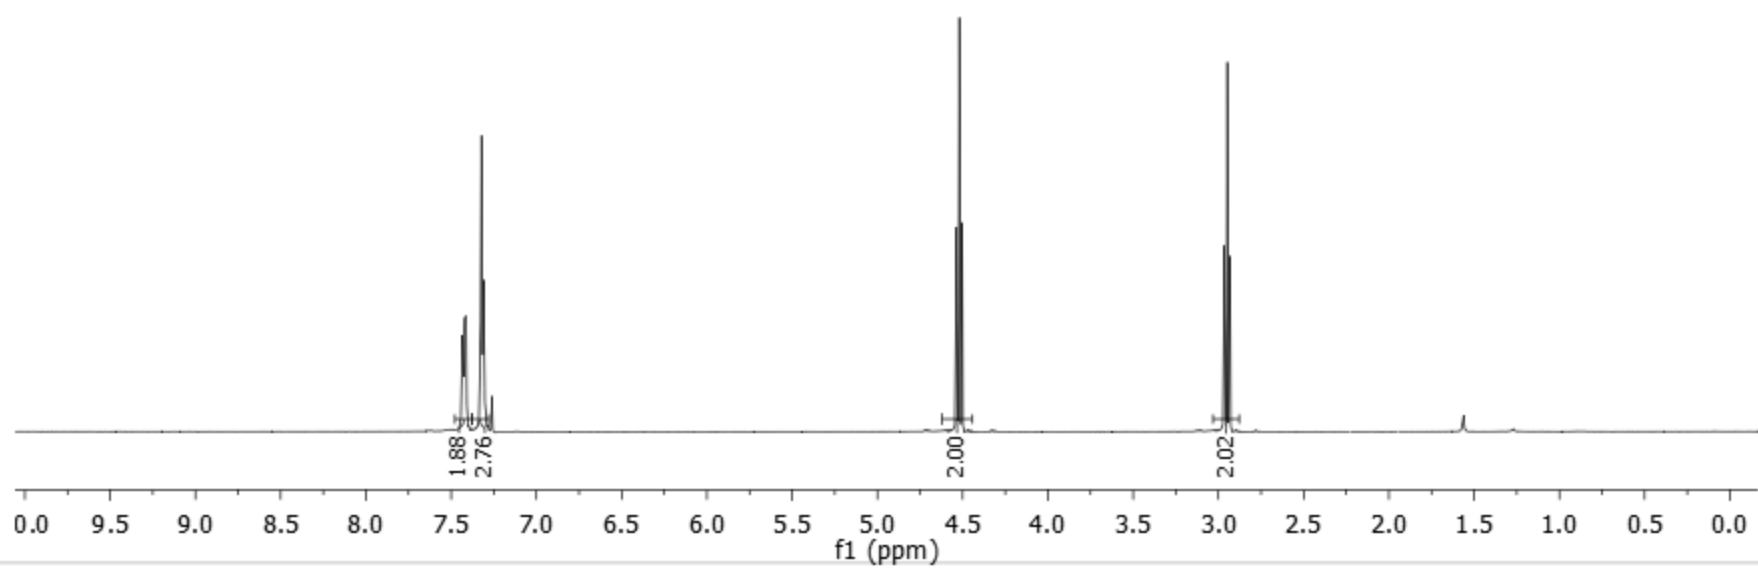

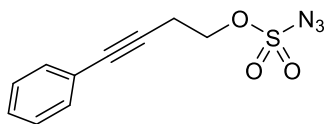

$^{13}\text{C}$  NMR of **1r**, 100 MHz,  $\text{CDCl}_3$

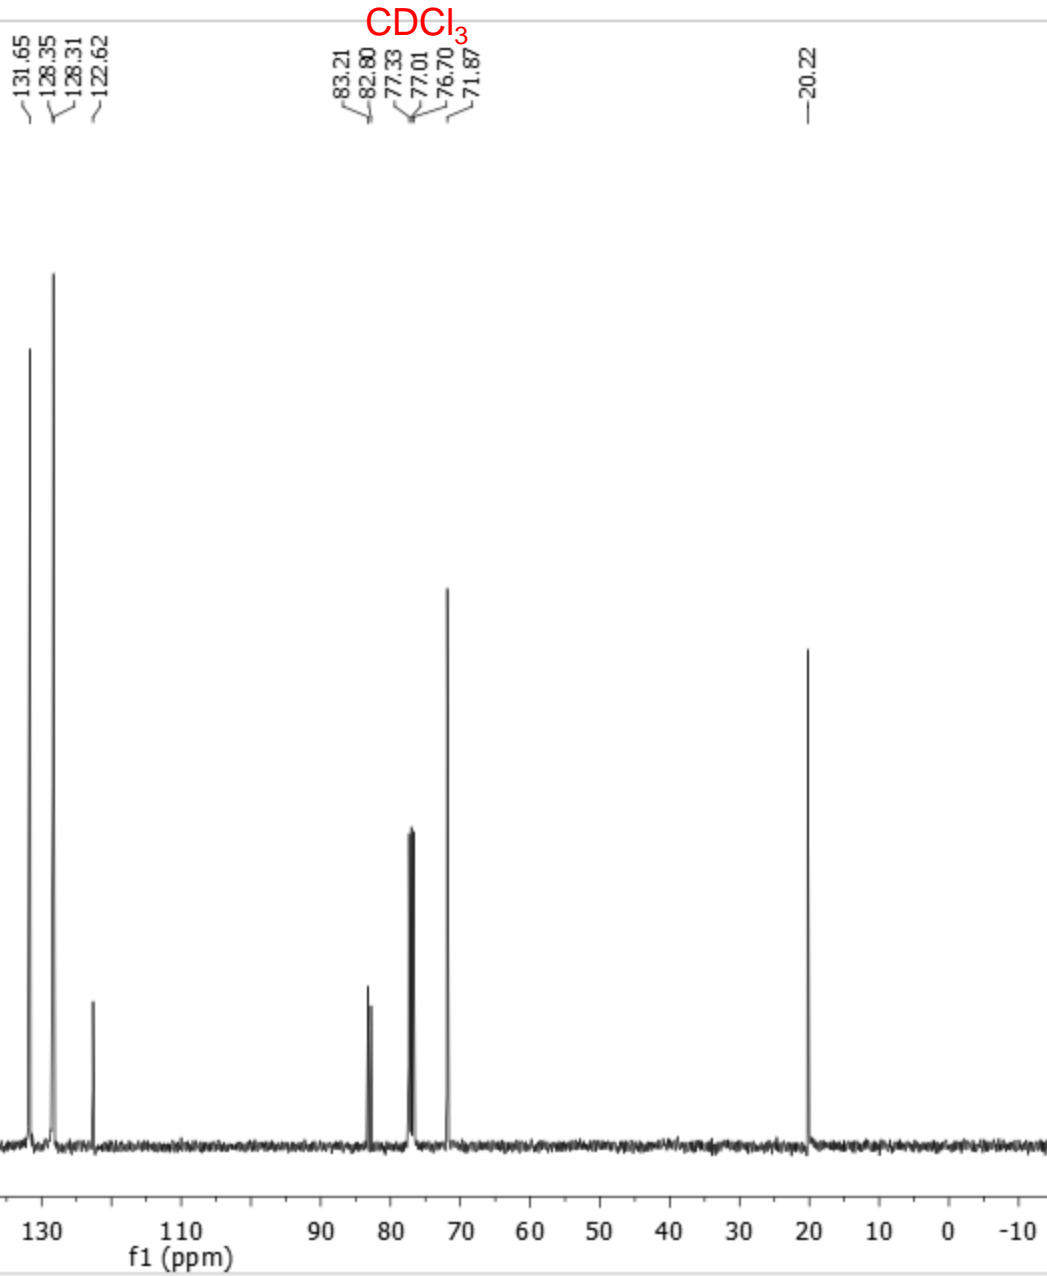

CHCl<sub>3</sub>

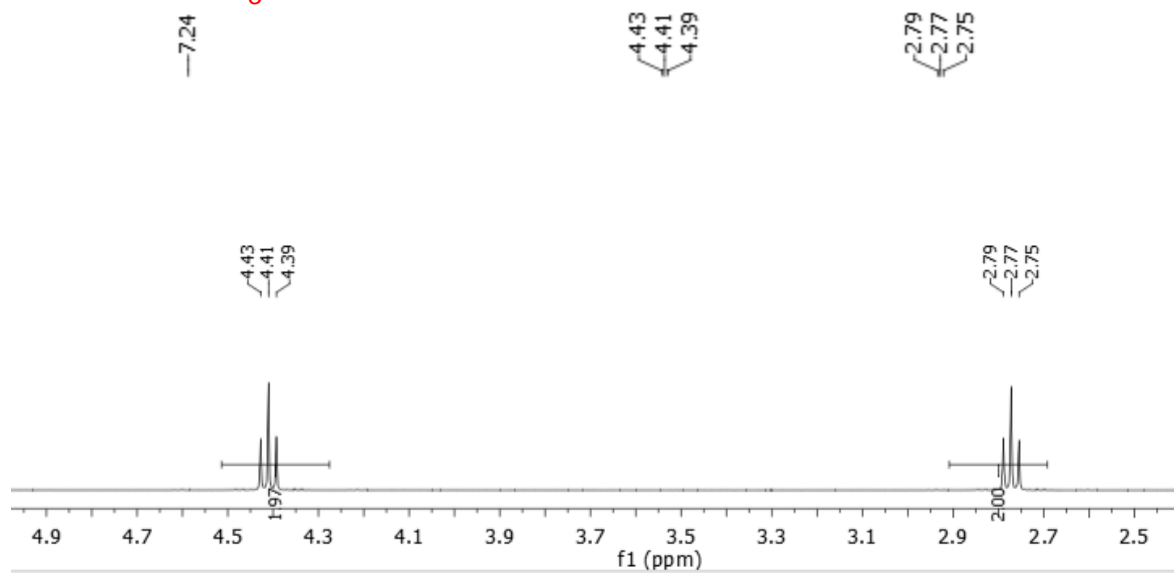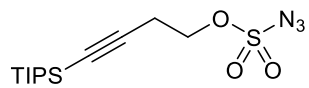

<sup>1</sup>H NMR of **1s**, 400 MHz, CDCl<sub>3</sub>

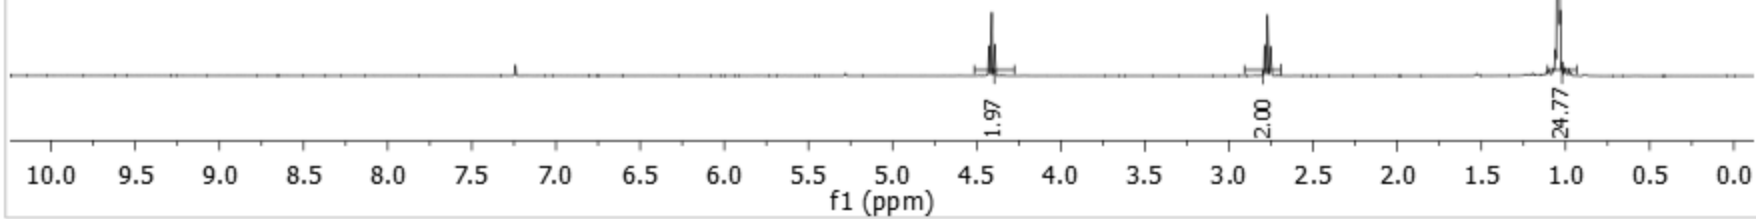



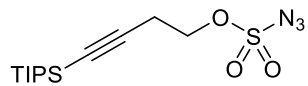

$^{13}\text{C}$  NMR of **1s**, 100 MHz,  $\text{CDCl}_3$

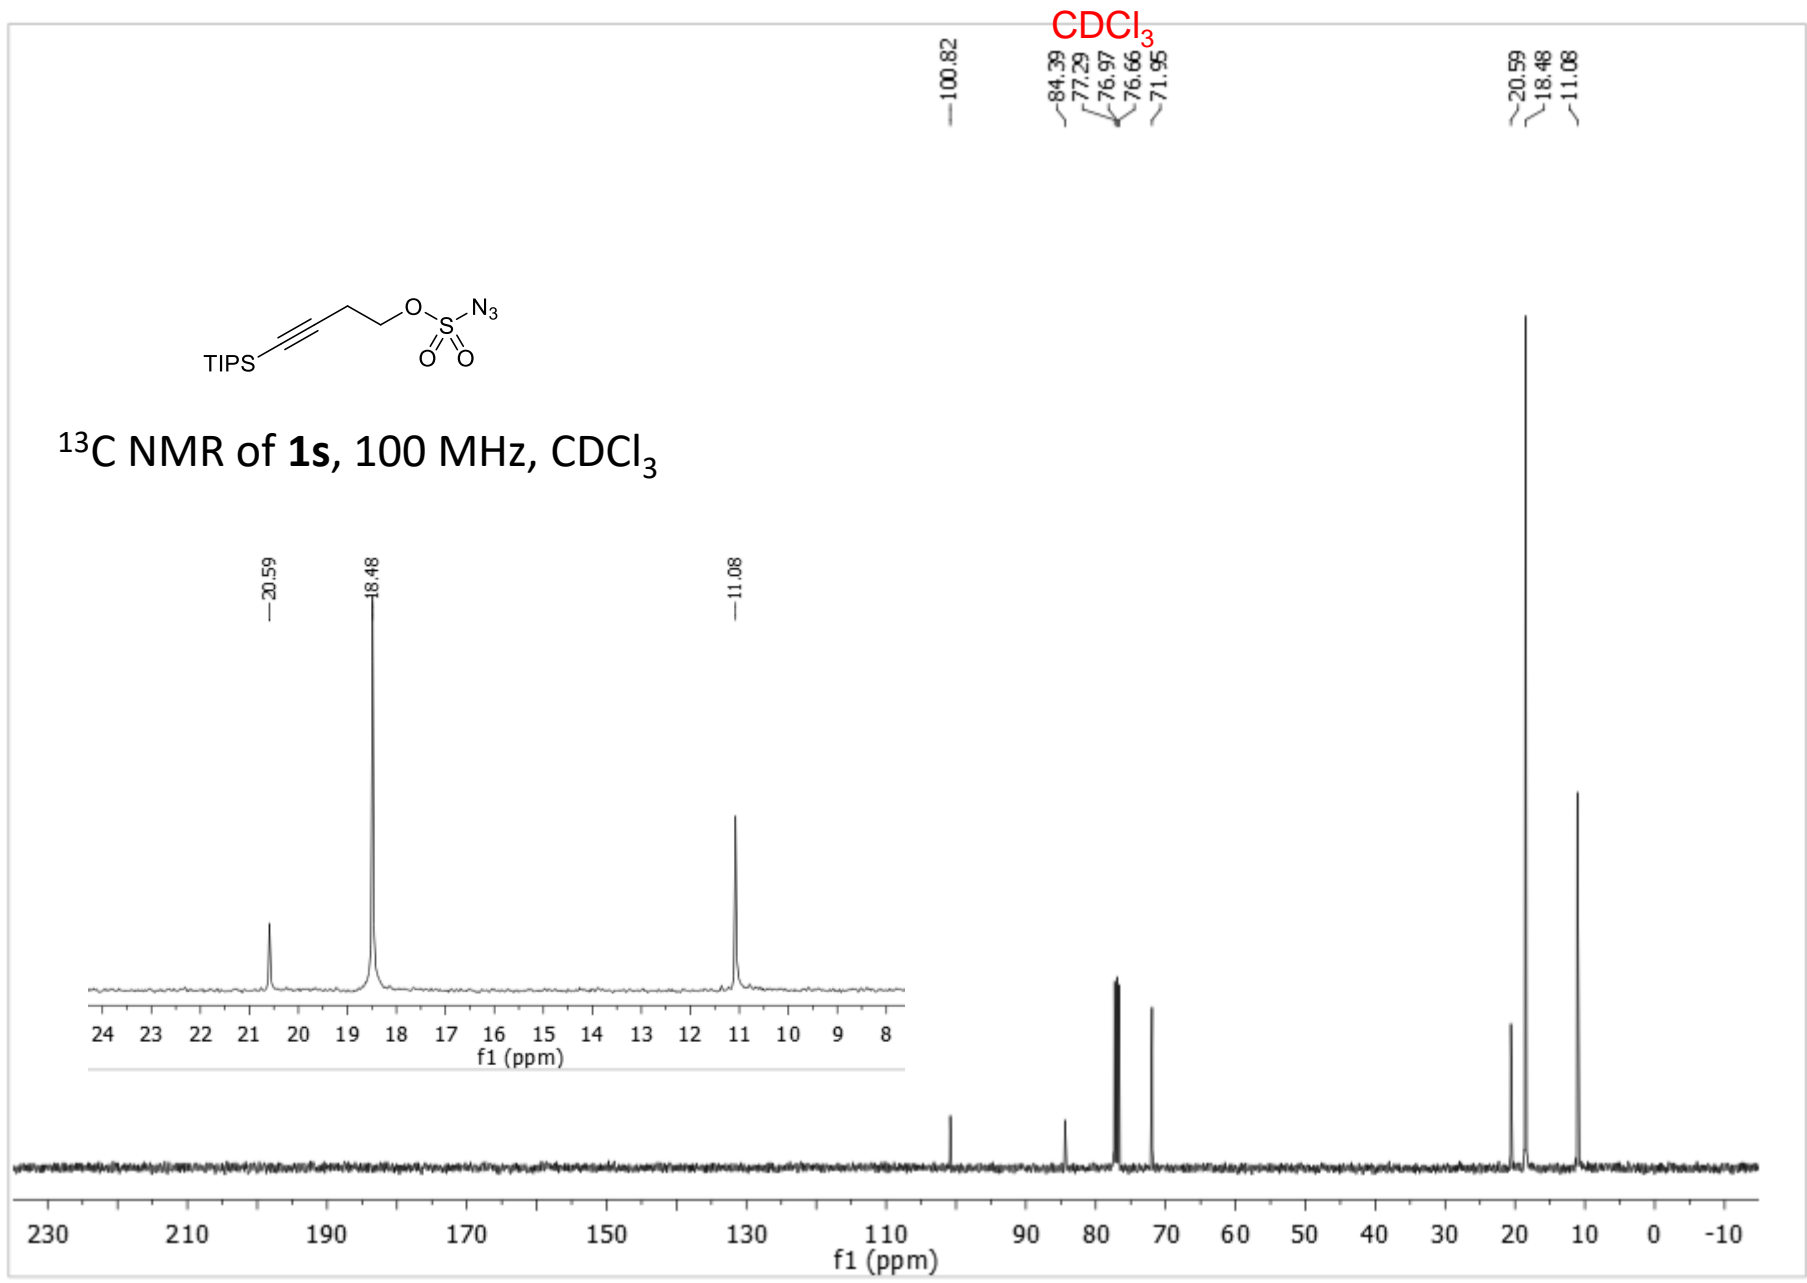

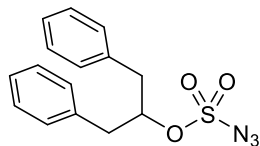

$^1\text{H}$  NMR of **1t**, 600 MHz,  $\text{CDCl}_3$

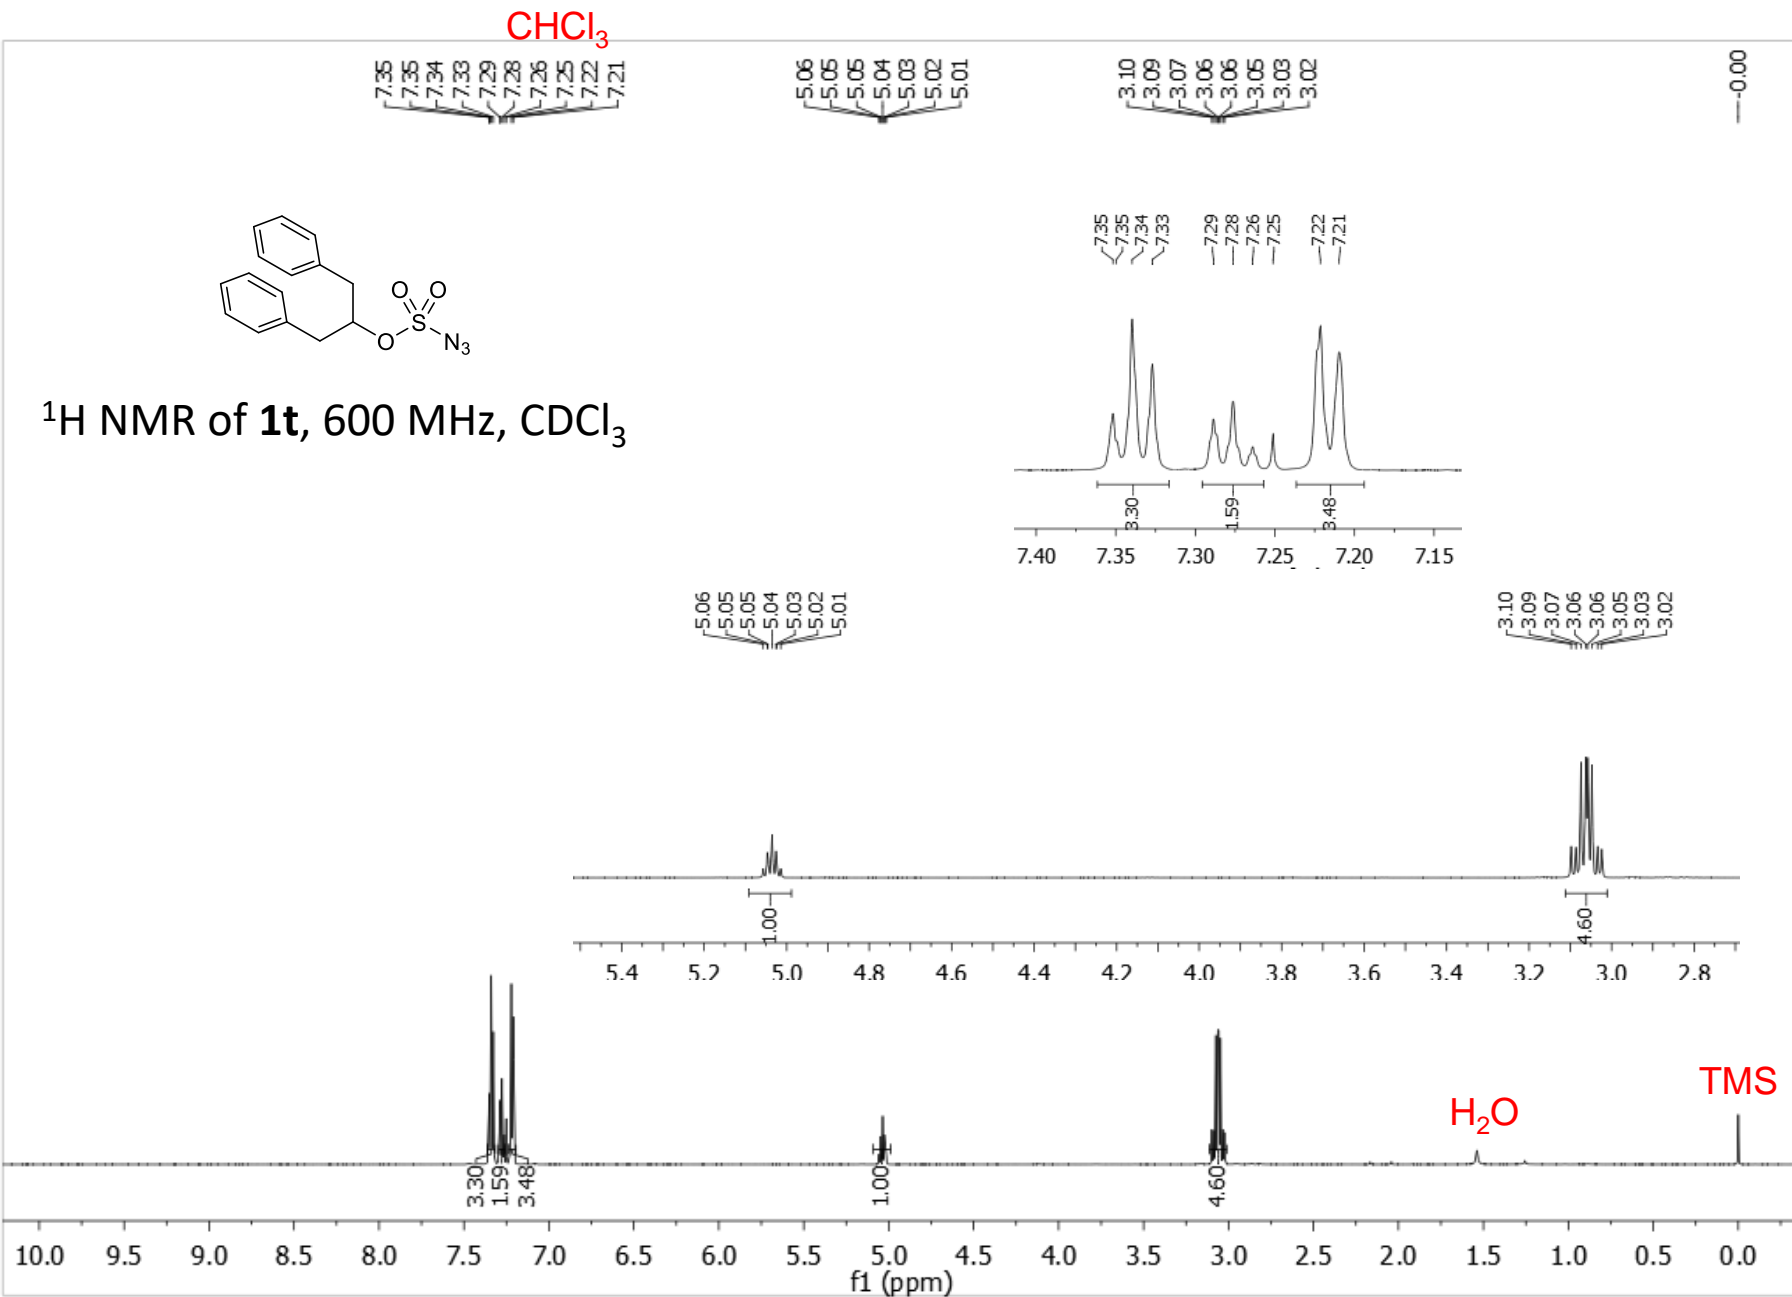

$\text{CDCl}_3$



$^{13}\text{C}$  NMR of **1t**, 150 MHz,  $\text{CDCl}_3$

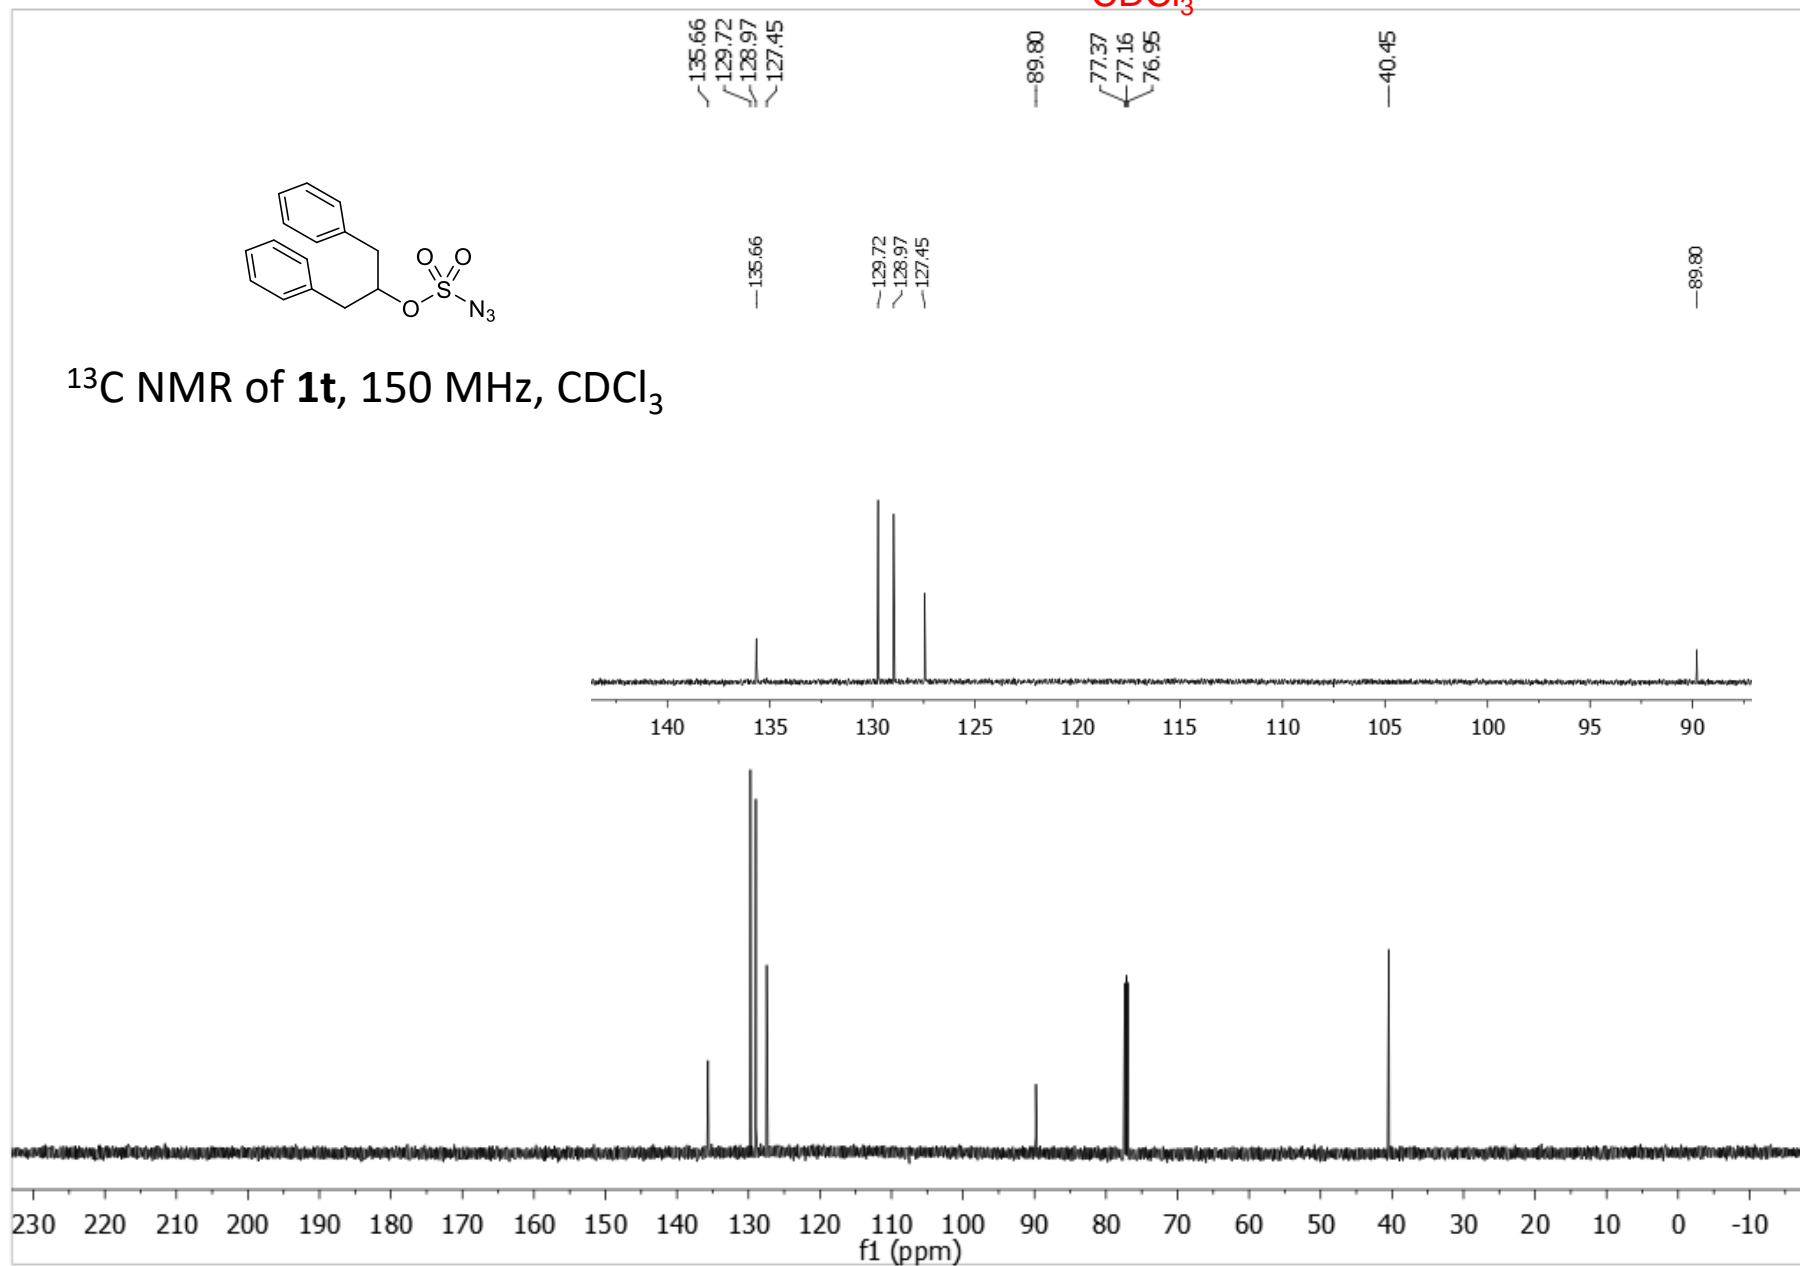



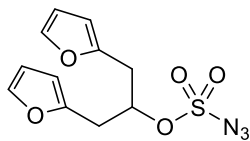

$^{13}\text{C}$  NMR of **1u**, 150 MHz,  $\text{CDCl}_3$

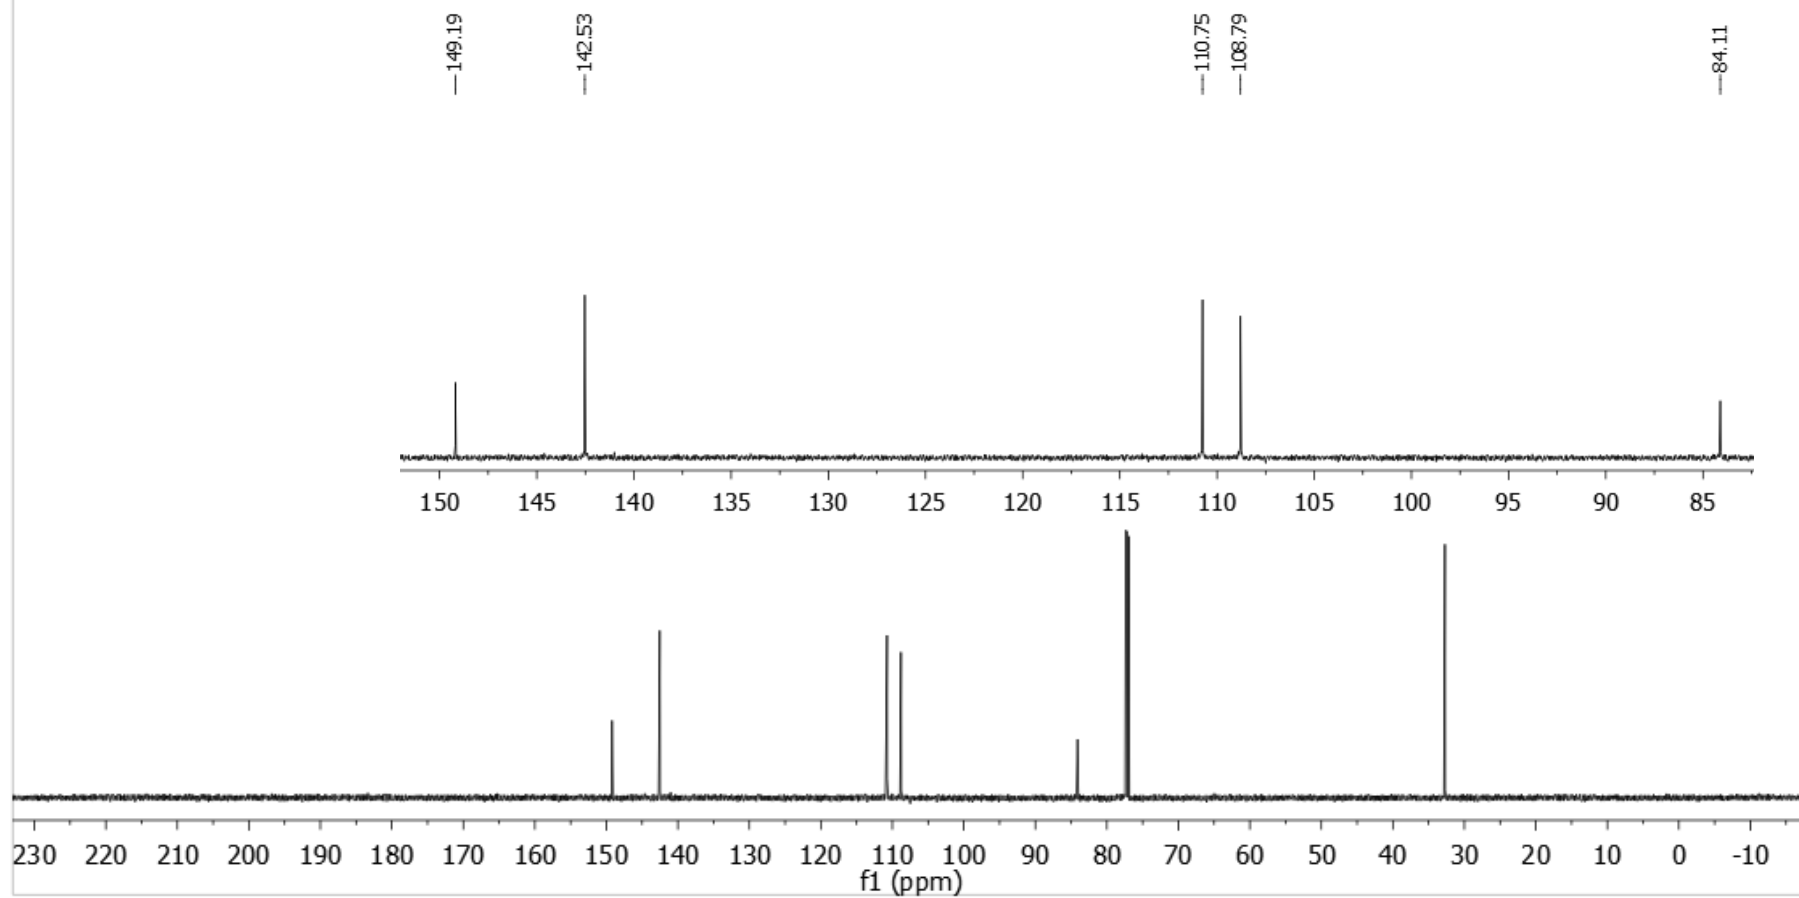

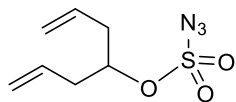

CHCl<sub>3</sub>

<sup>1</sup>H NMR of **1v**, 600 MHz, CDCl<sub>3</sub>

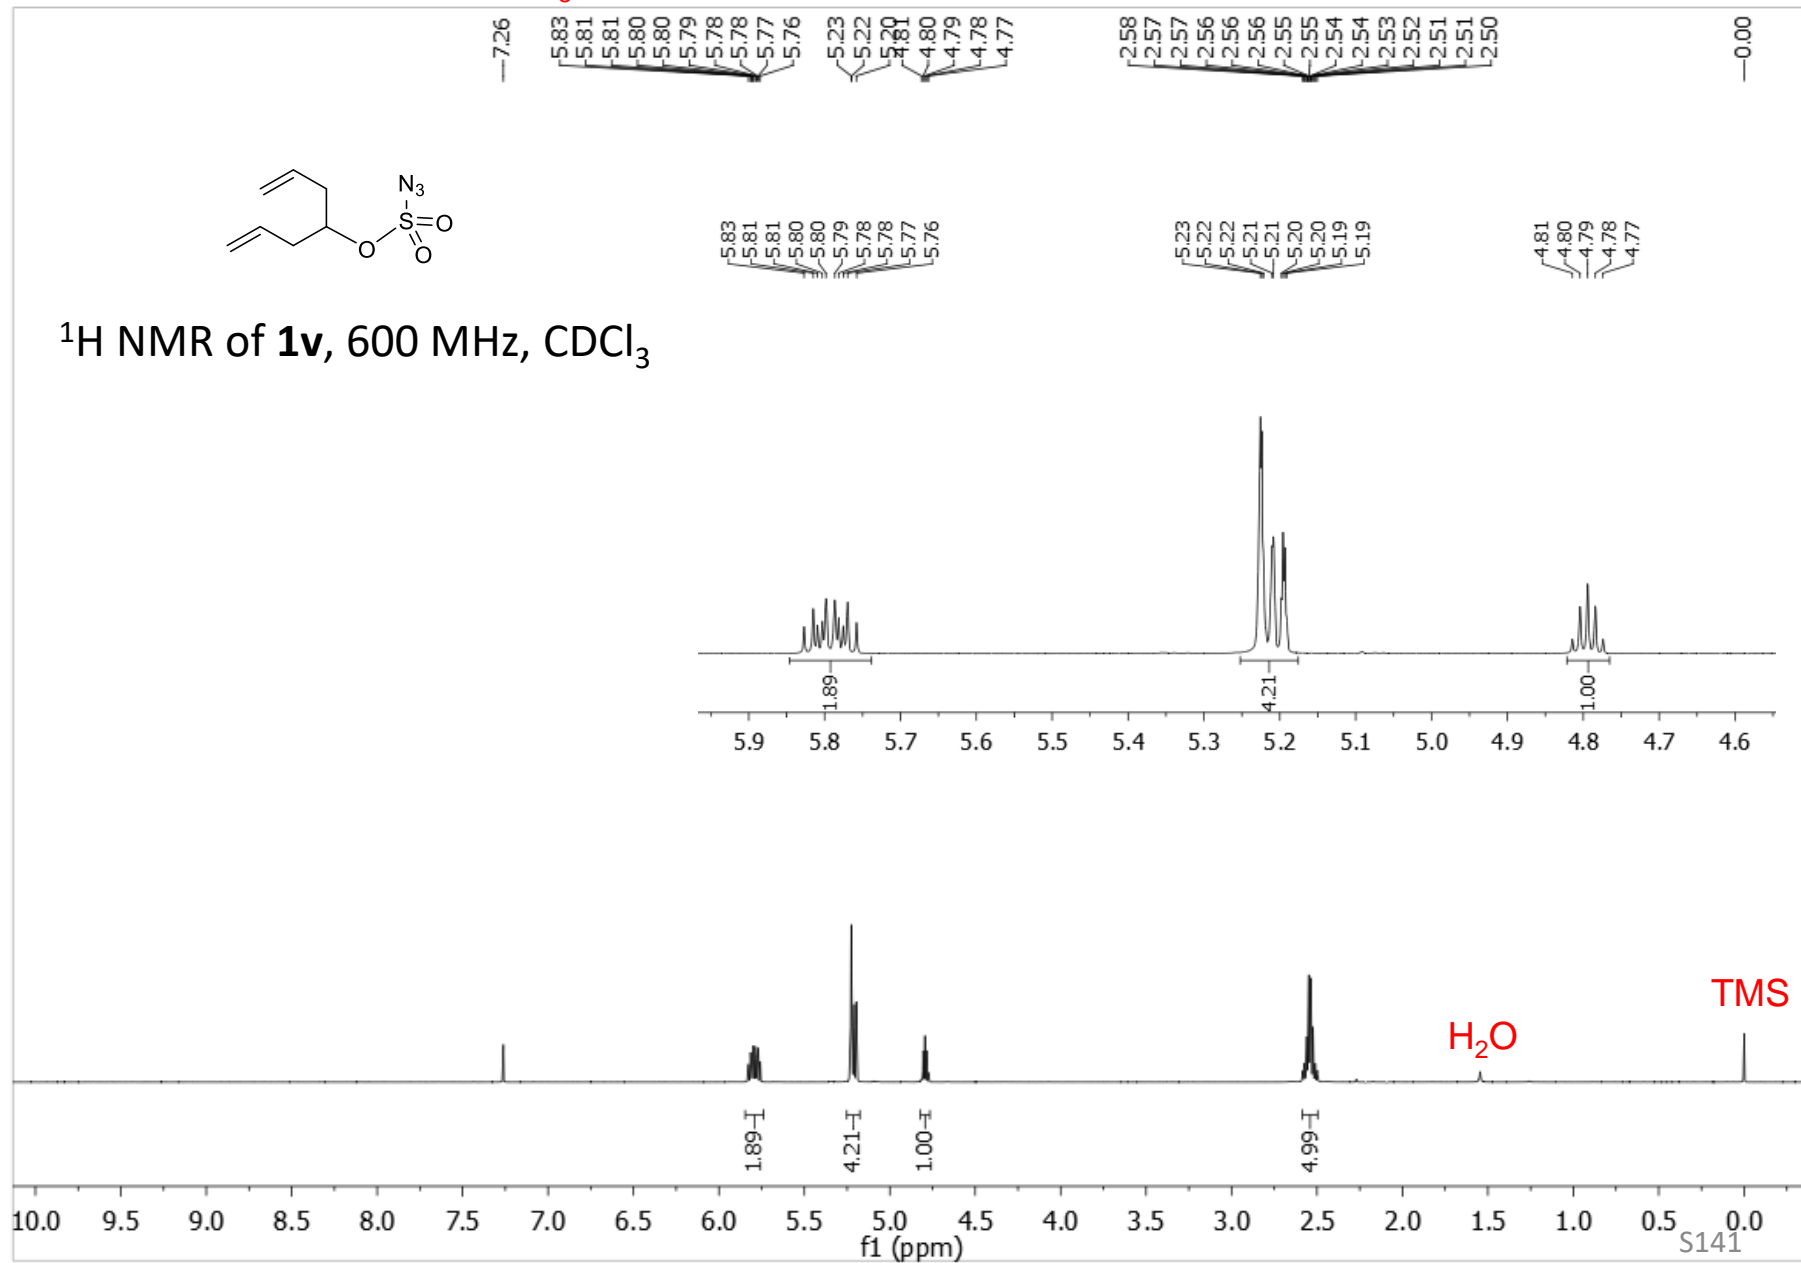



$^{13}\text{C}$  NMR of **1v**, 150 MHz,  $\text{CDCl}_3$

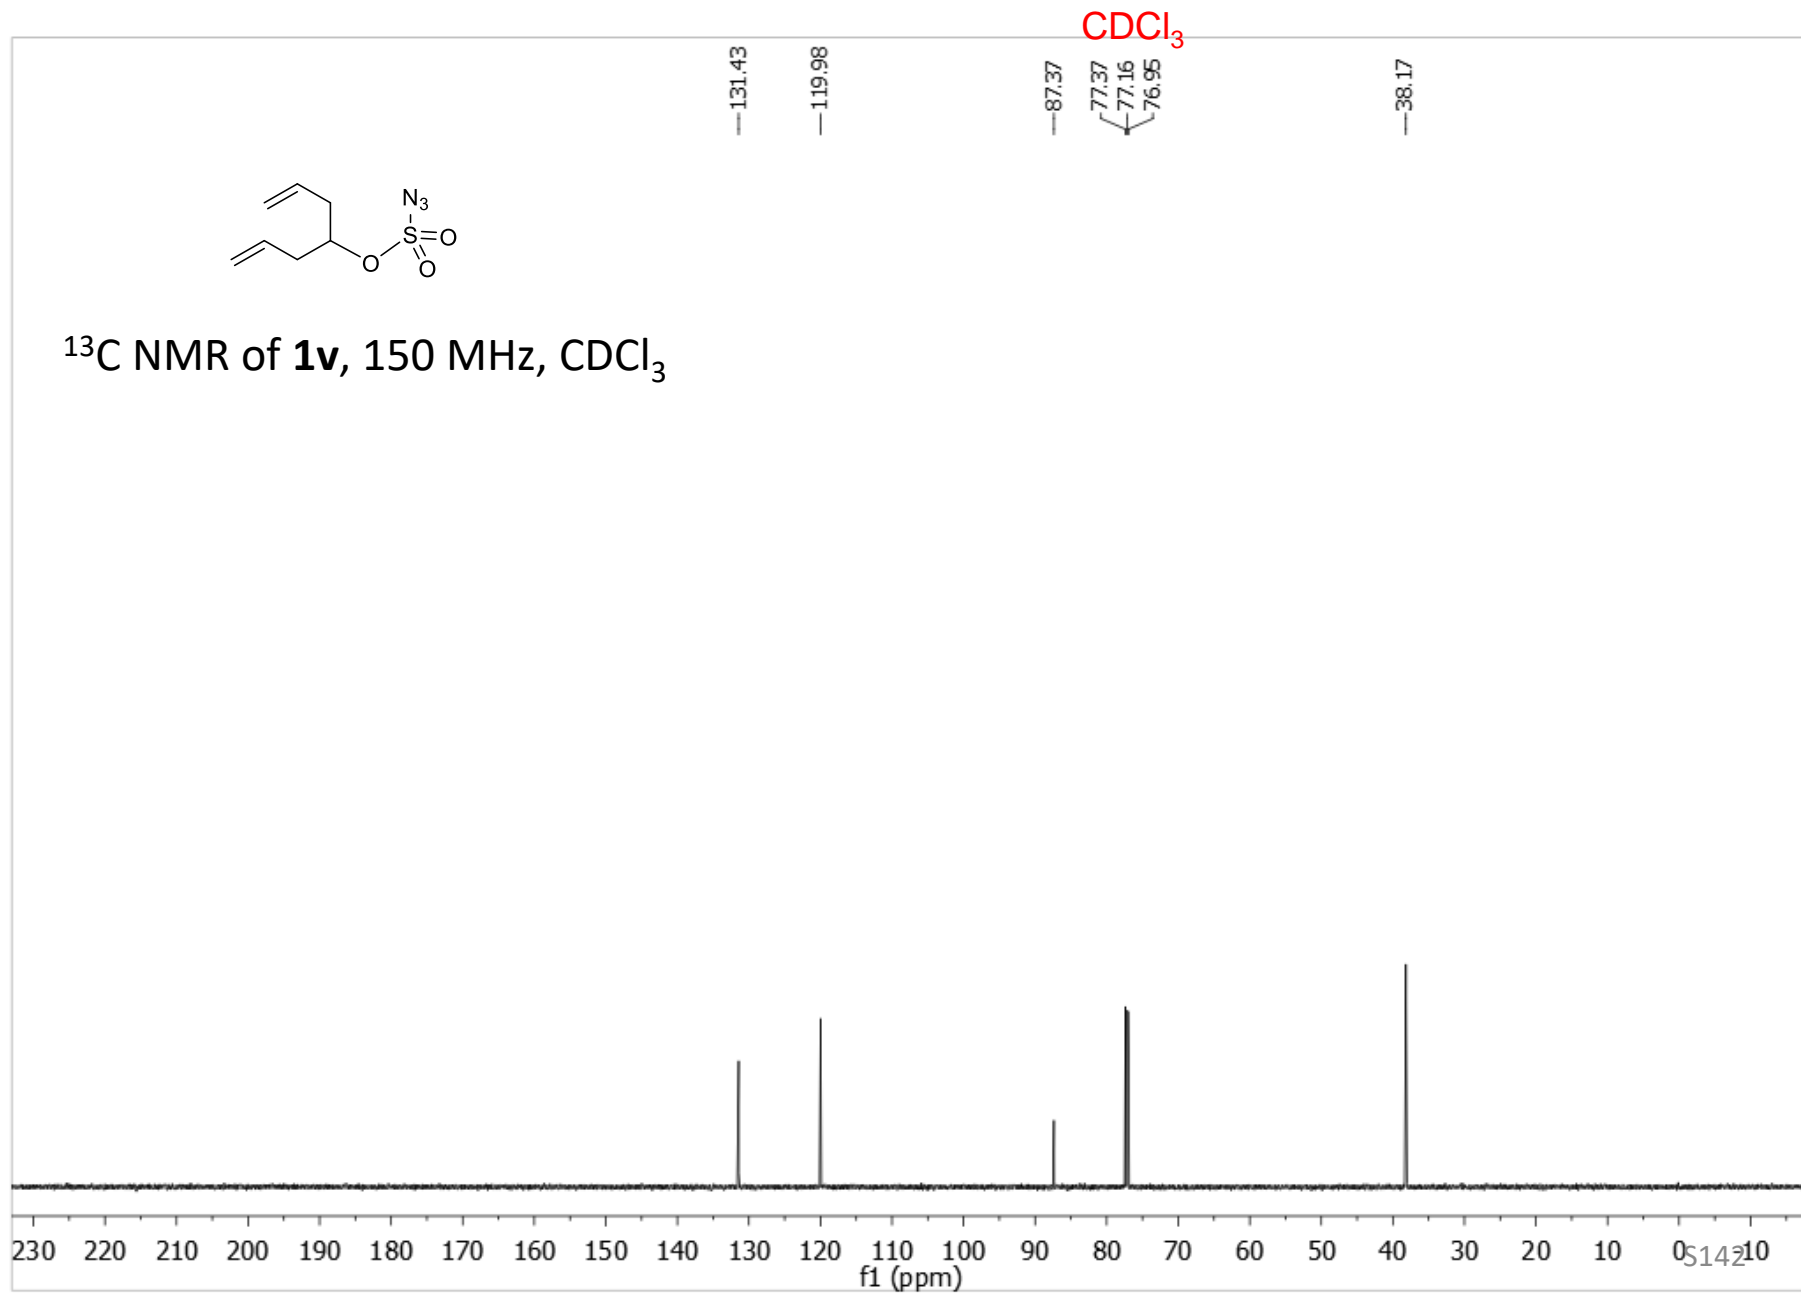

CHCl<sub>3</sub>

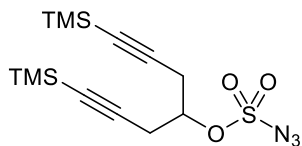

<sup>1</sup>H NMR of **1w**, 600 MHz, CDCl<sub>3</sub>

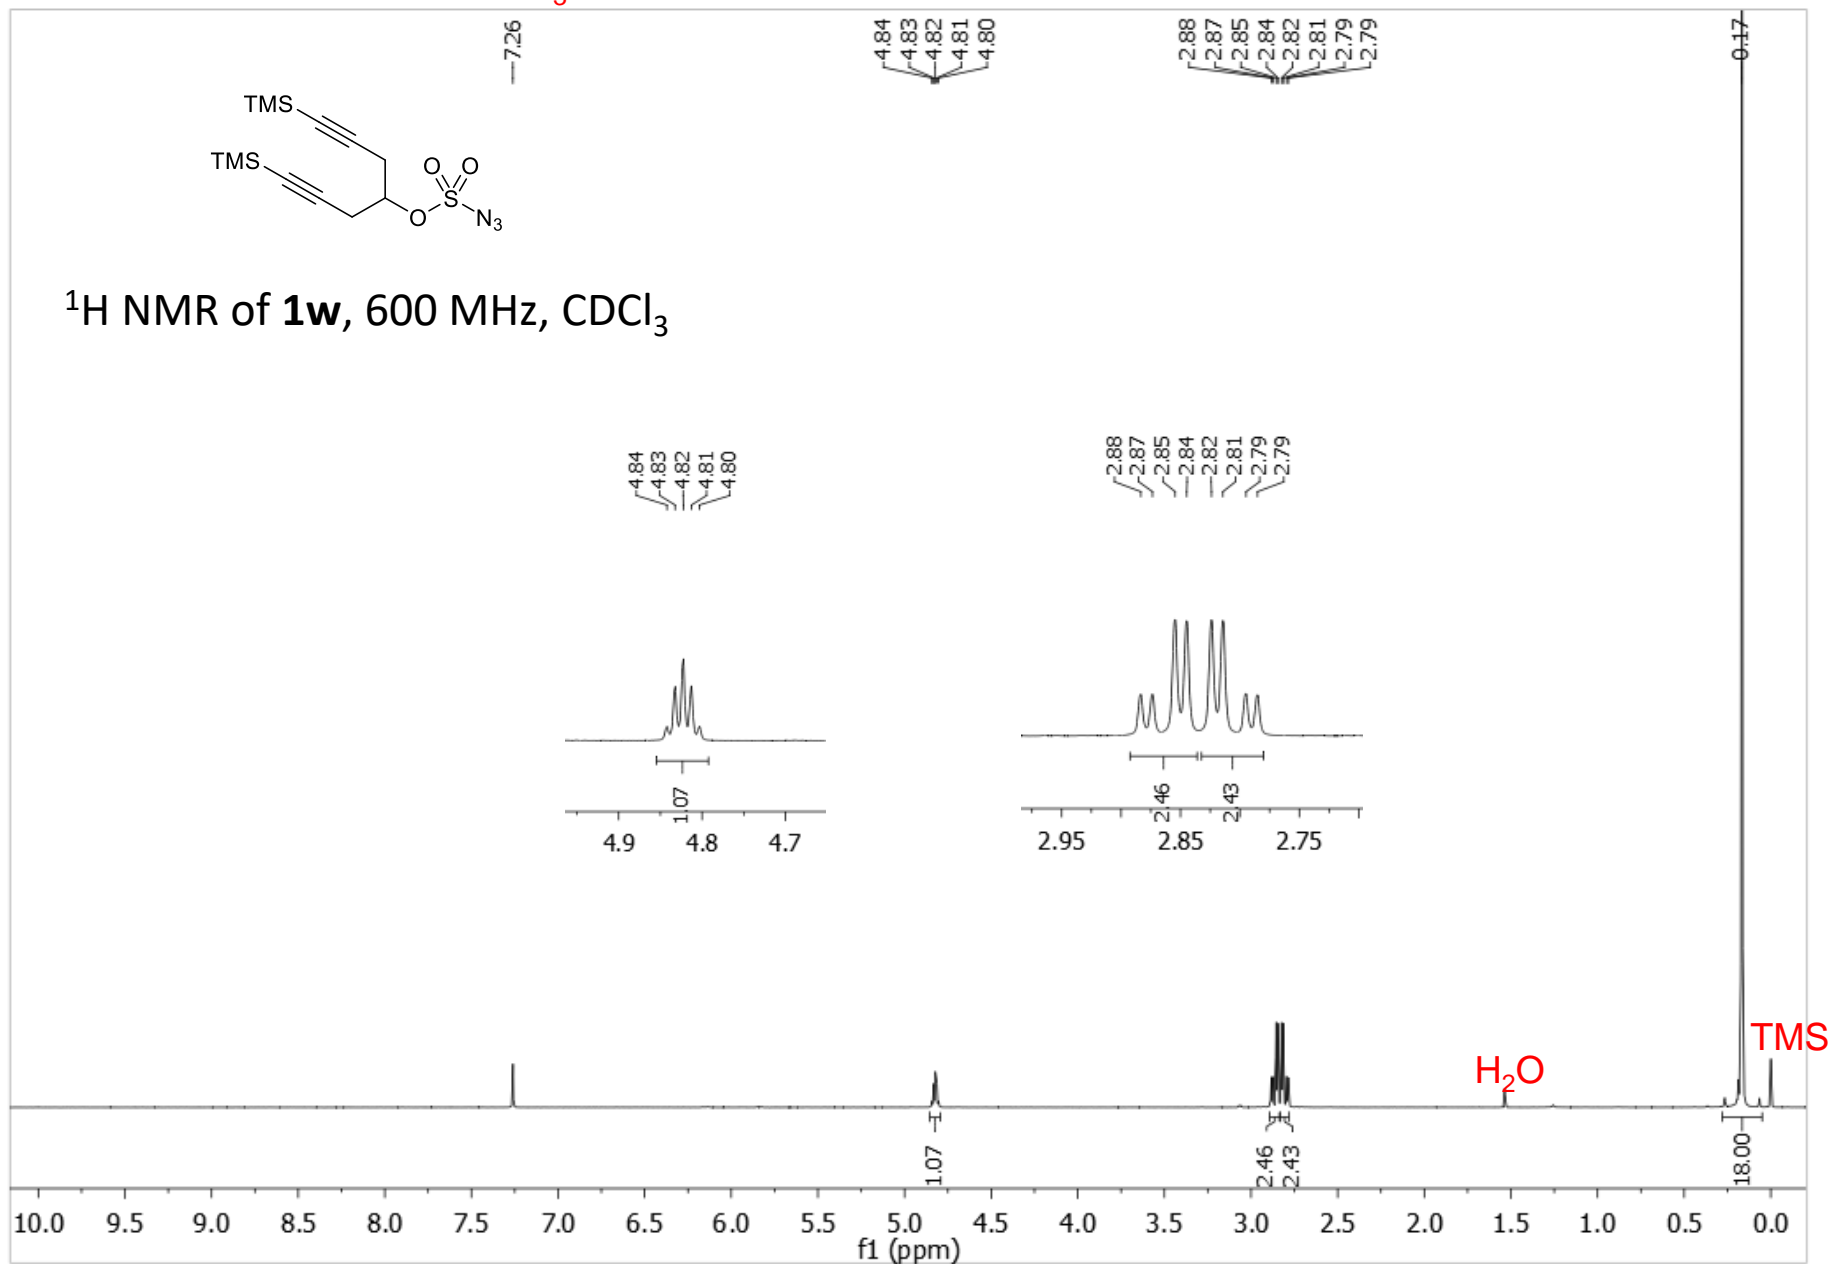



CDCl<sub>3</sub>

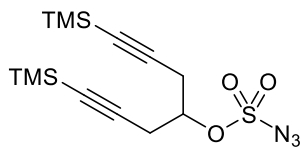

<sup>13</sup>C NMR of **1w**, 150 MHz, CDCl<sub>3</sub>

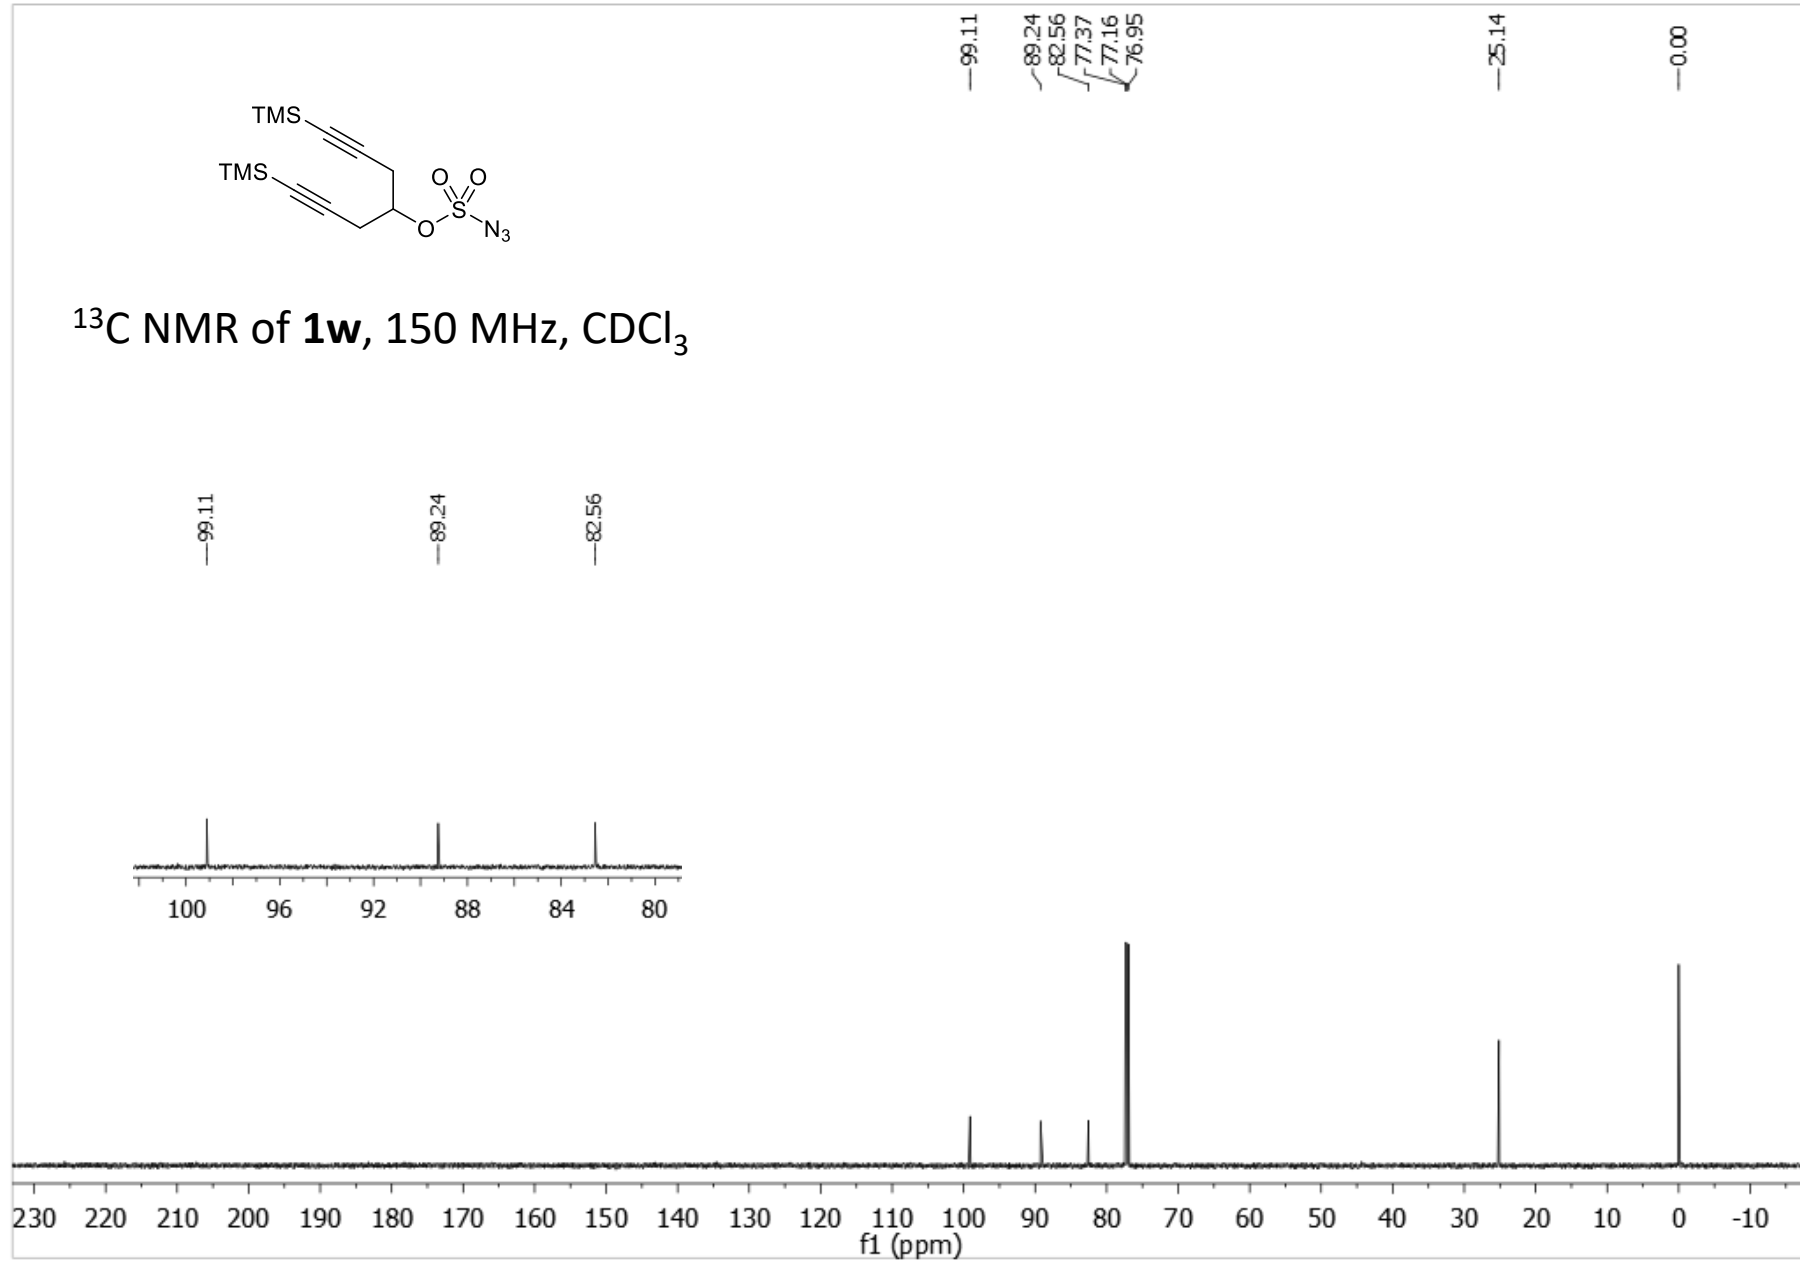

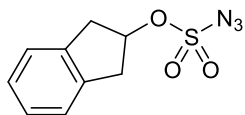

$^1\text{H}$  NMR of **1x**, 600 MHz,  $\text{C}_6\text{D}_6$

$\text{C}_6\text{H}_6$

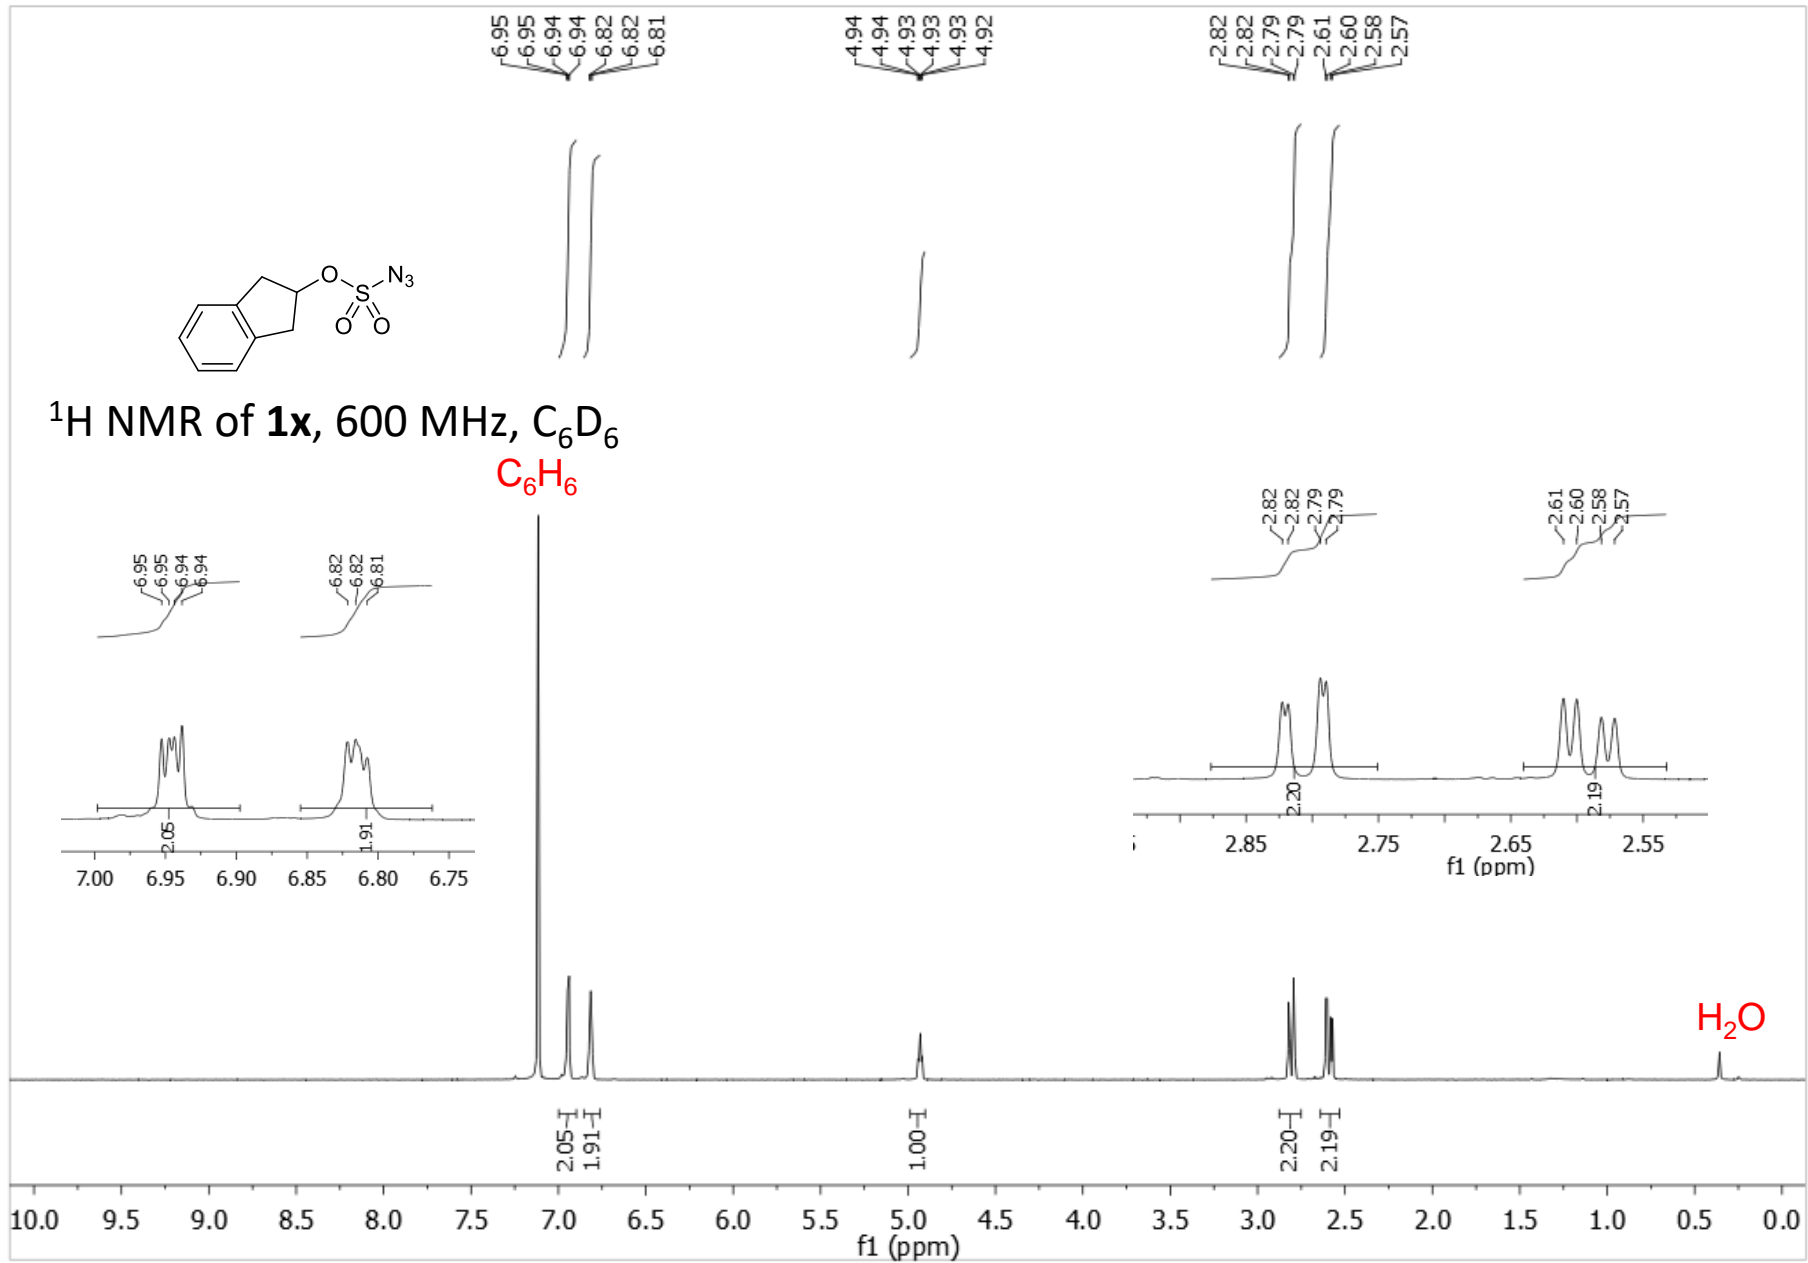

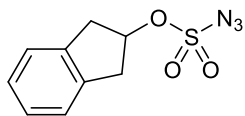

$^{13}\text{C}$  NMR of **1x**, 100 MHz,  $\text{CDCl}_3$

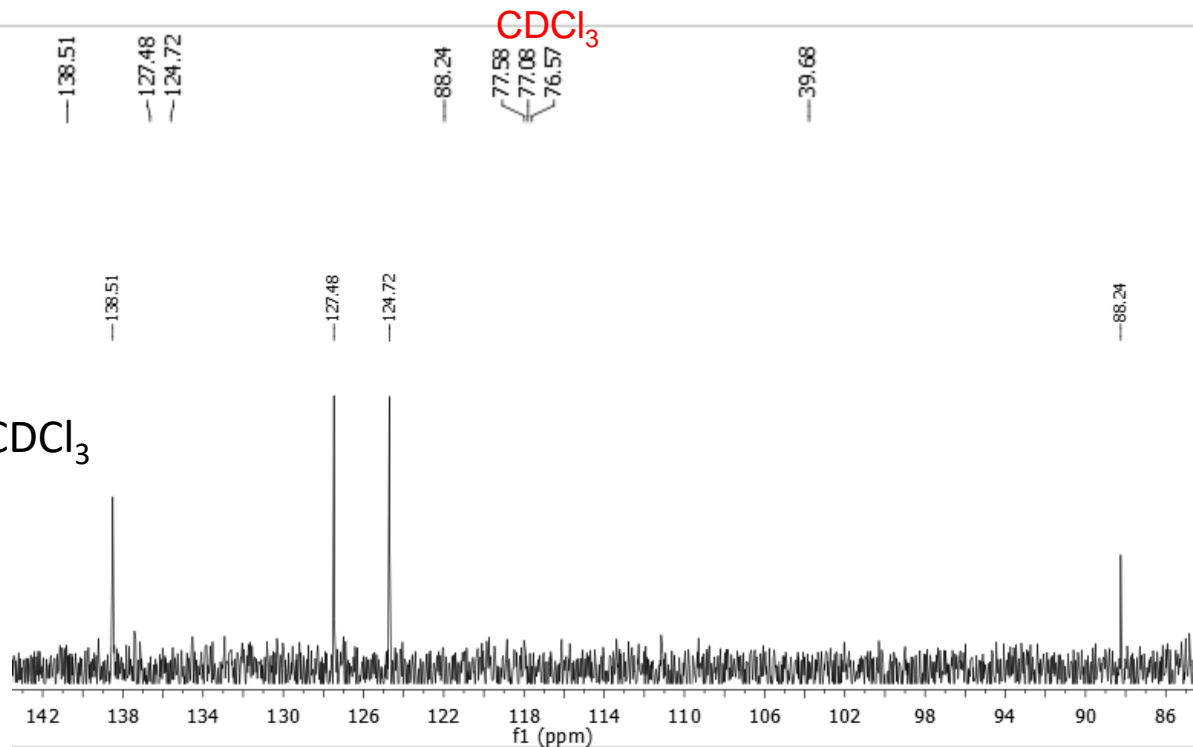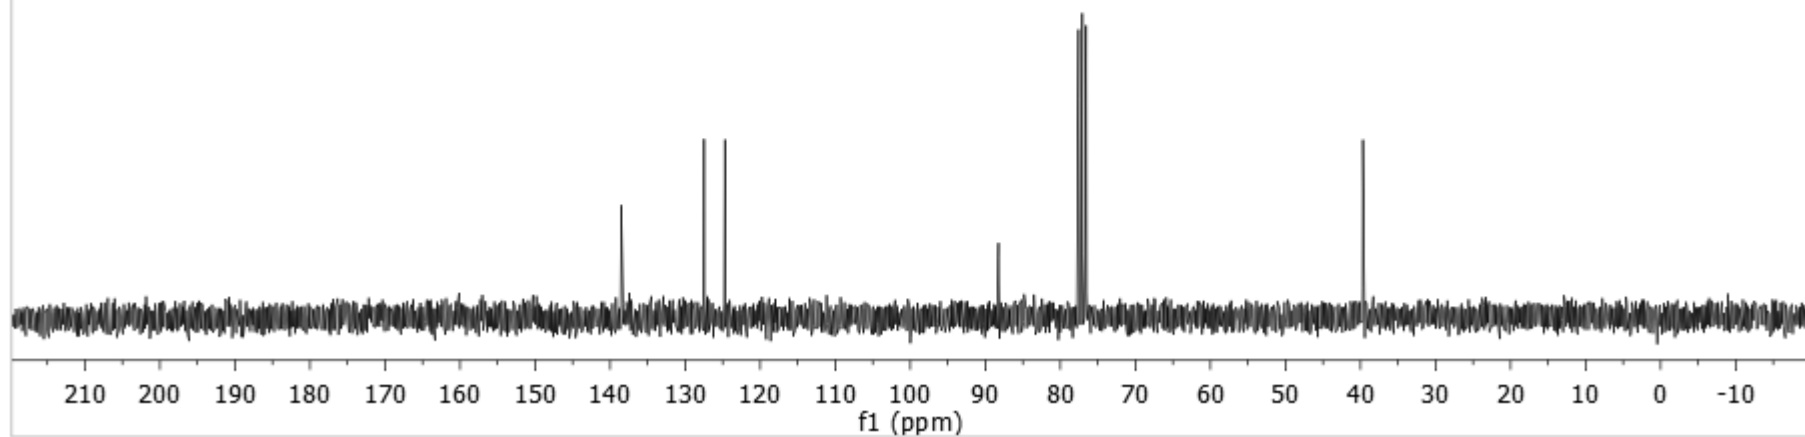

$\text{CHCl}_3$

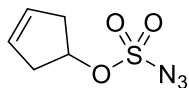

$^1\text{H}$  NMR of **1y**, 500 MHz,  $\text{CDCl}_3$

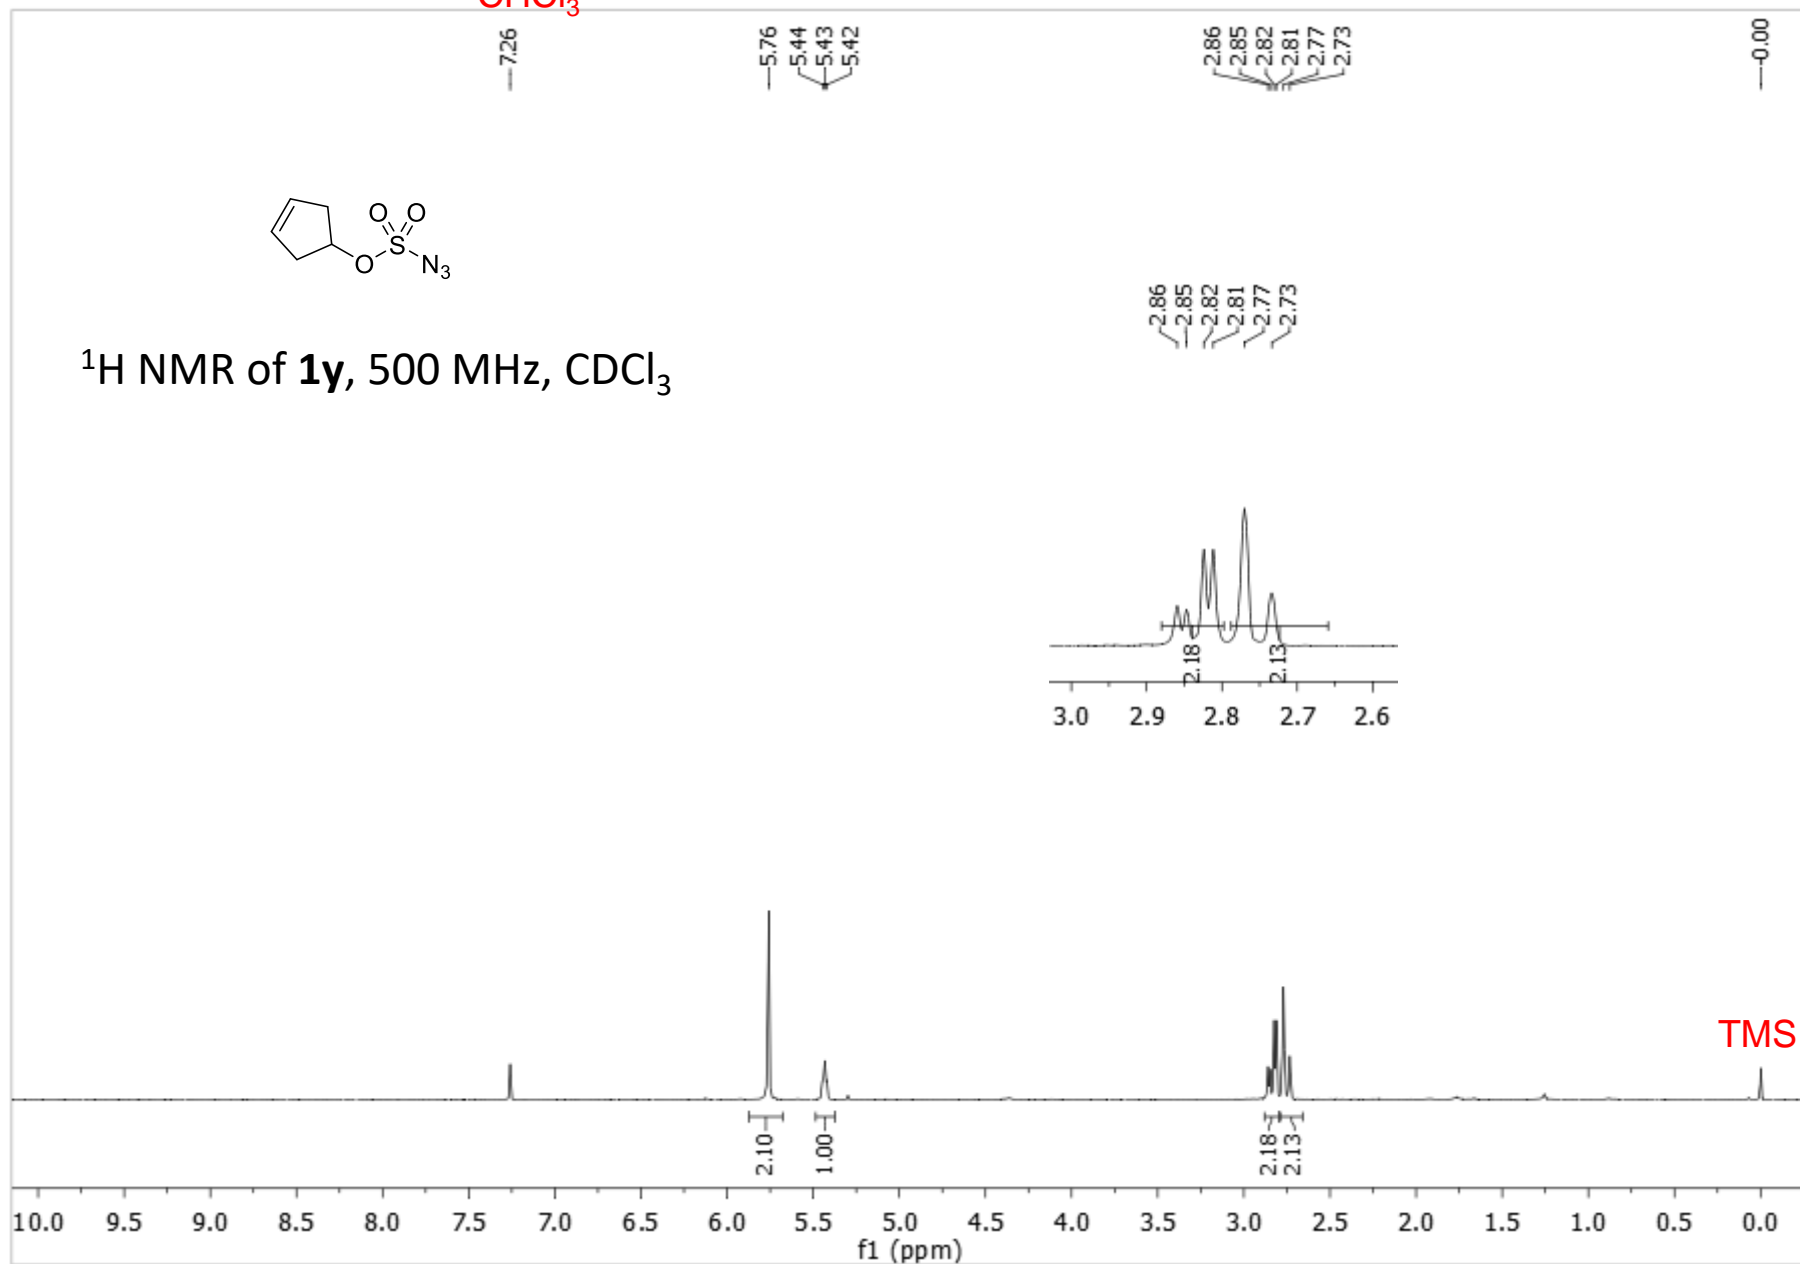

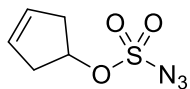

$^{13}\text{C}$  NMR of **1y**, 125 MHz,  $\text{CDCl}_3$

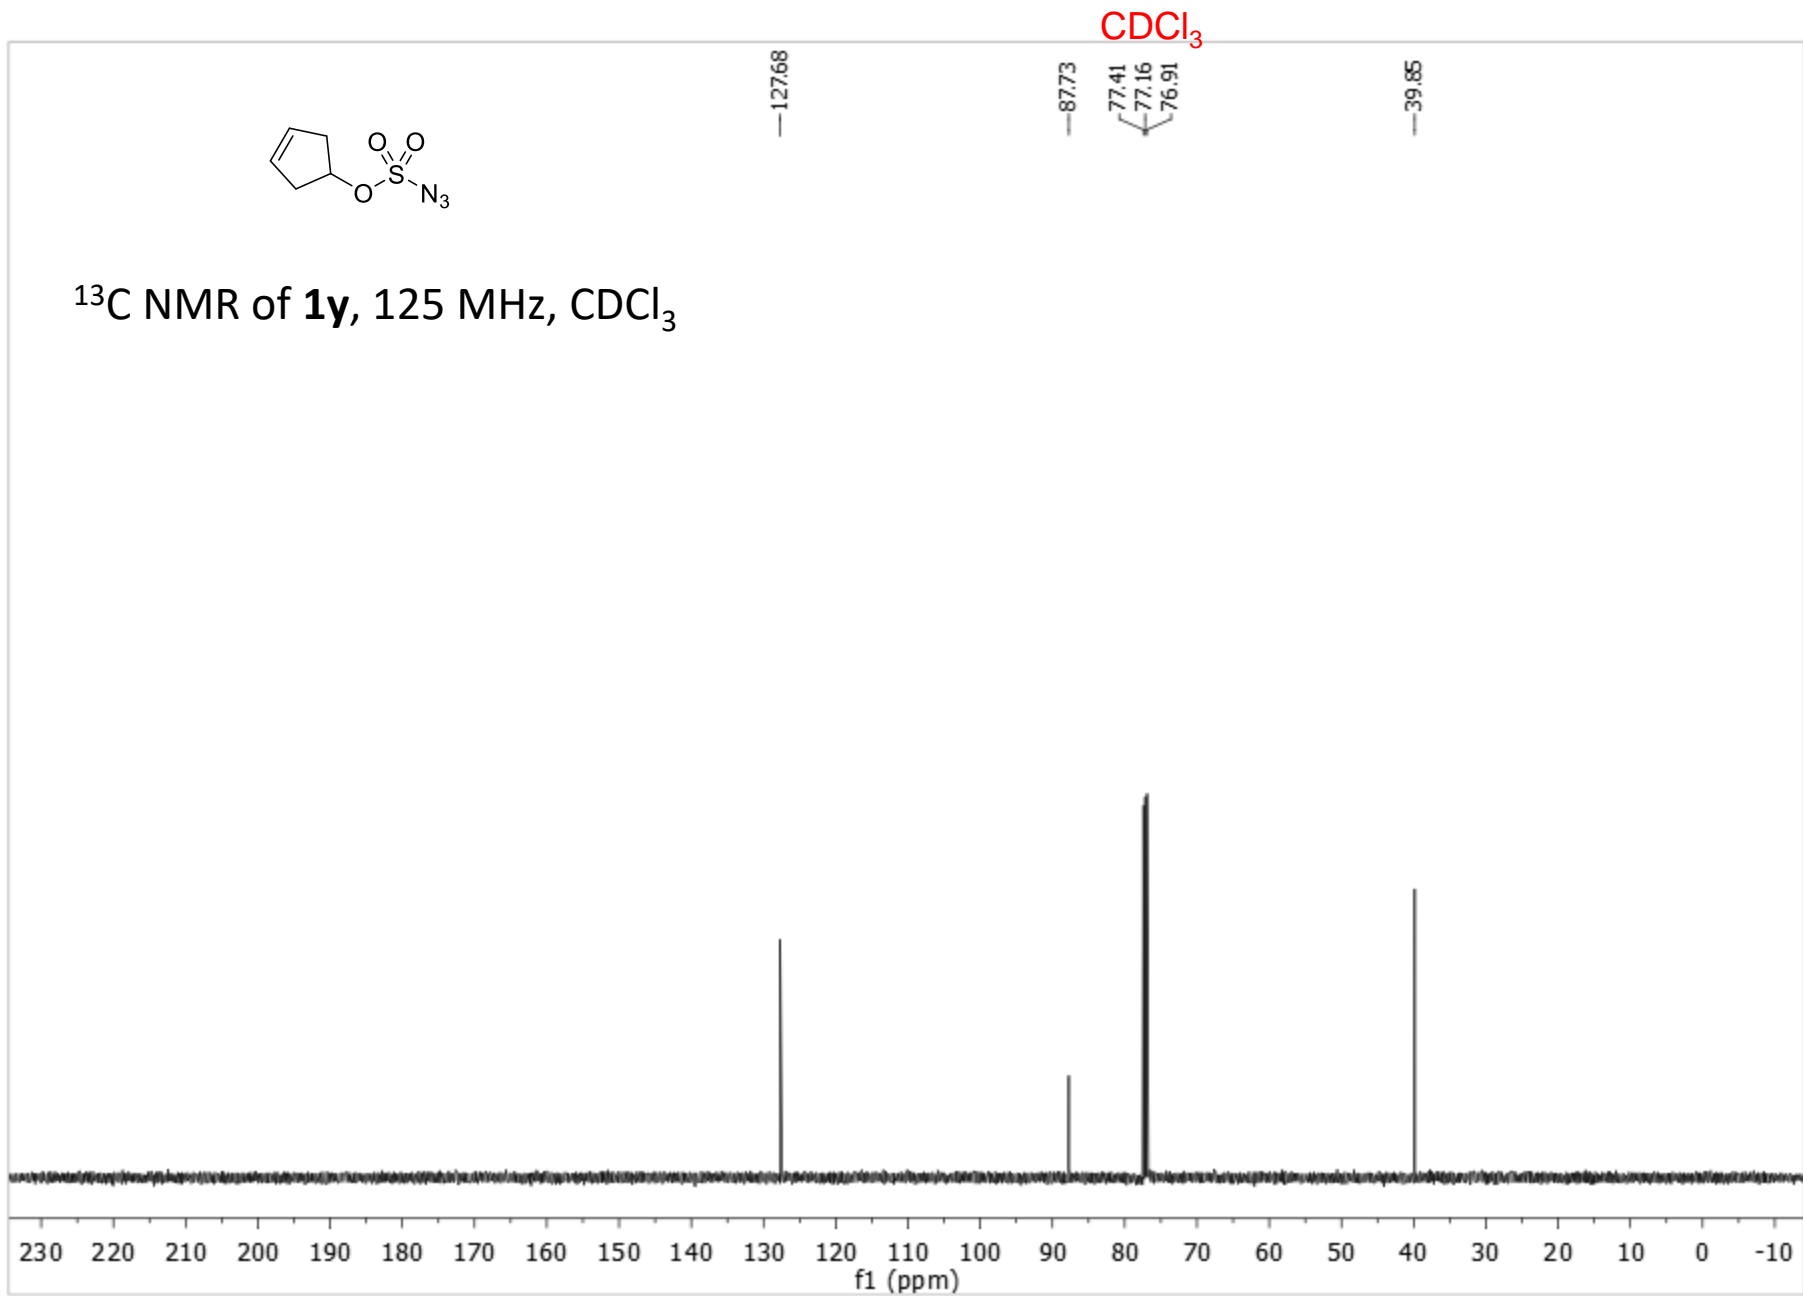

CHCl<sub>3</sub>

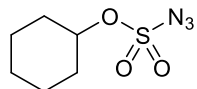

<sup>1</sup>H NMR of **1z**, 400 MHz, CDCl<sub>3</sub>

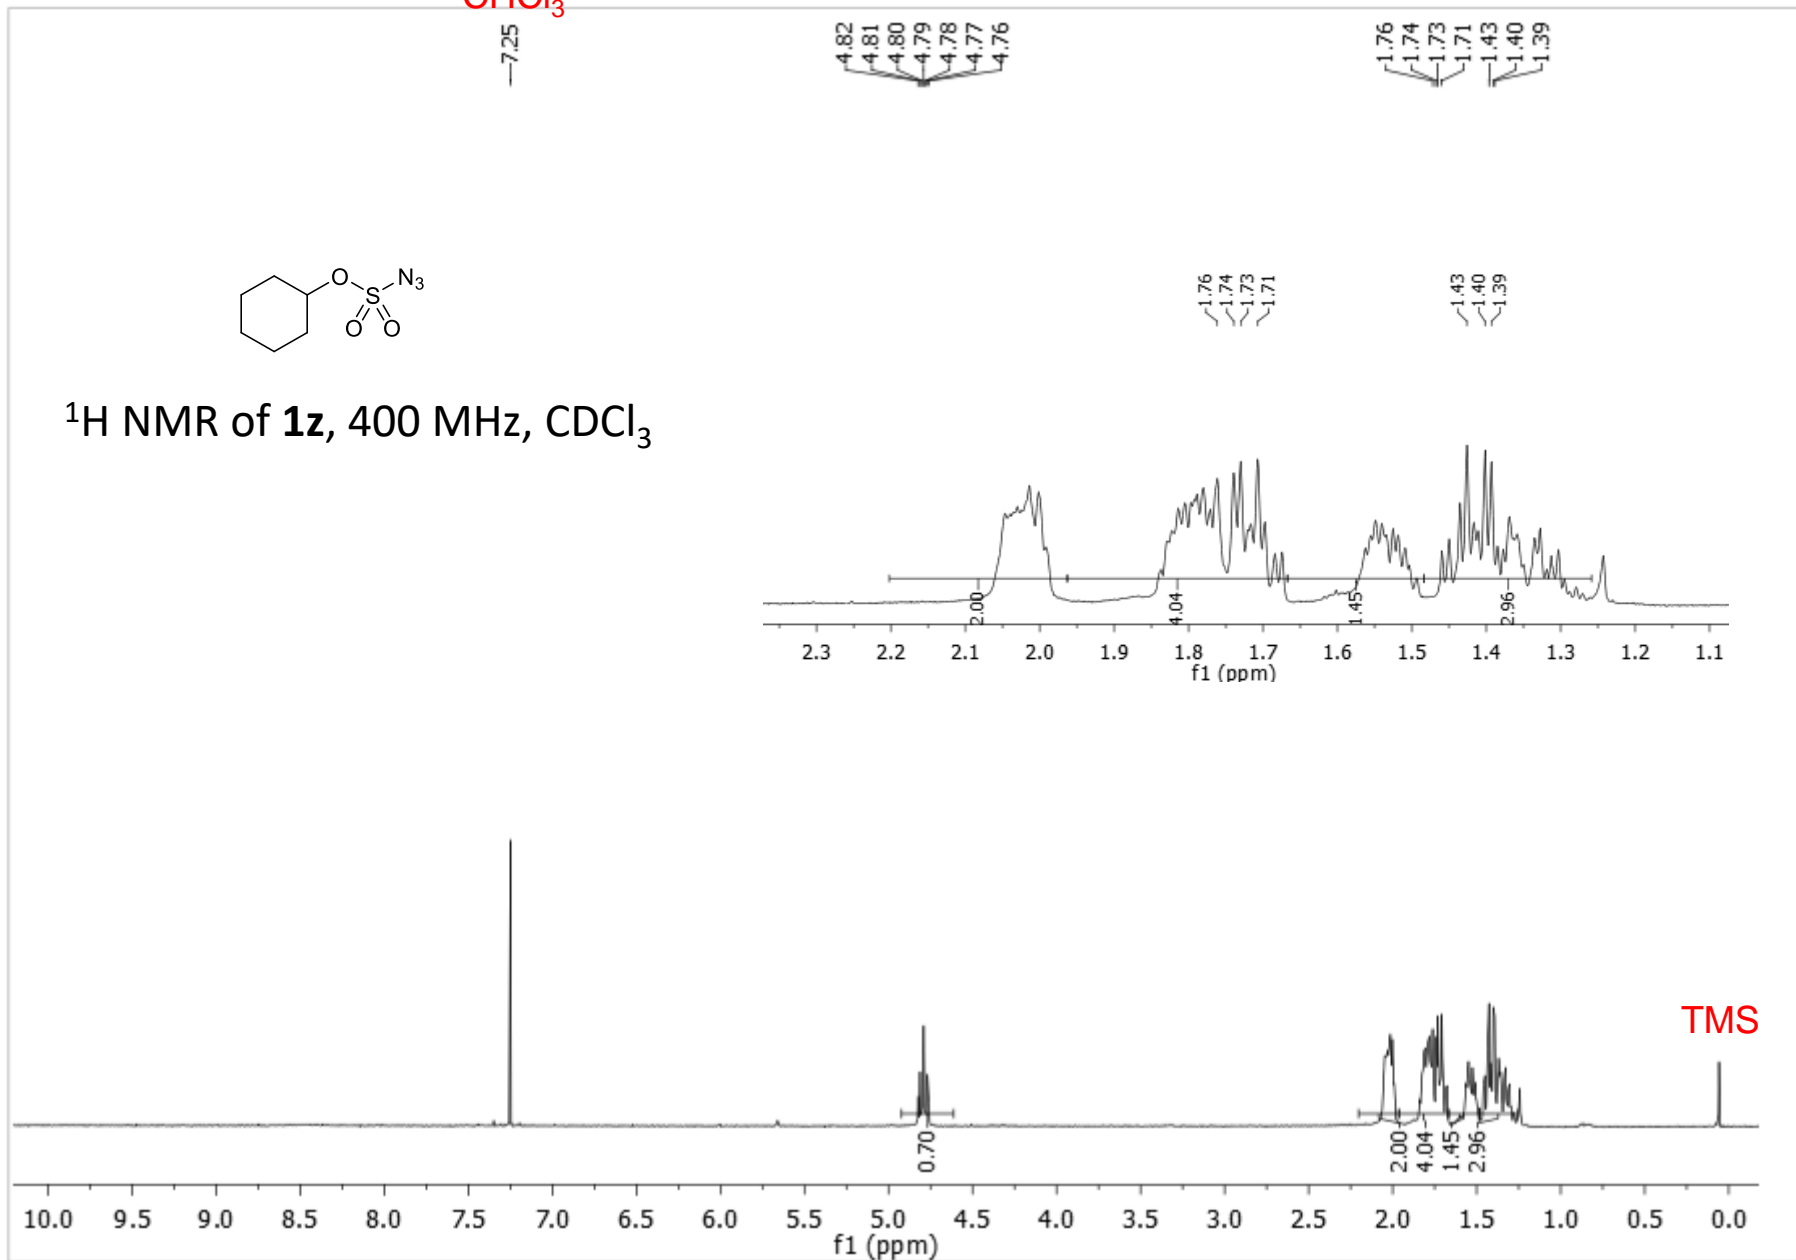

TMS

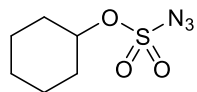

$^{13}\text{C}$  NMR of **1z**, 100 MHz,  $\text{CDCl}_3$

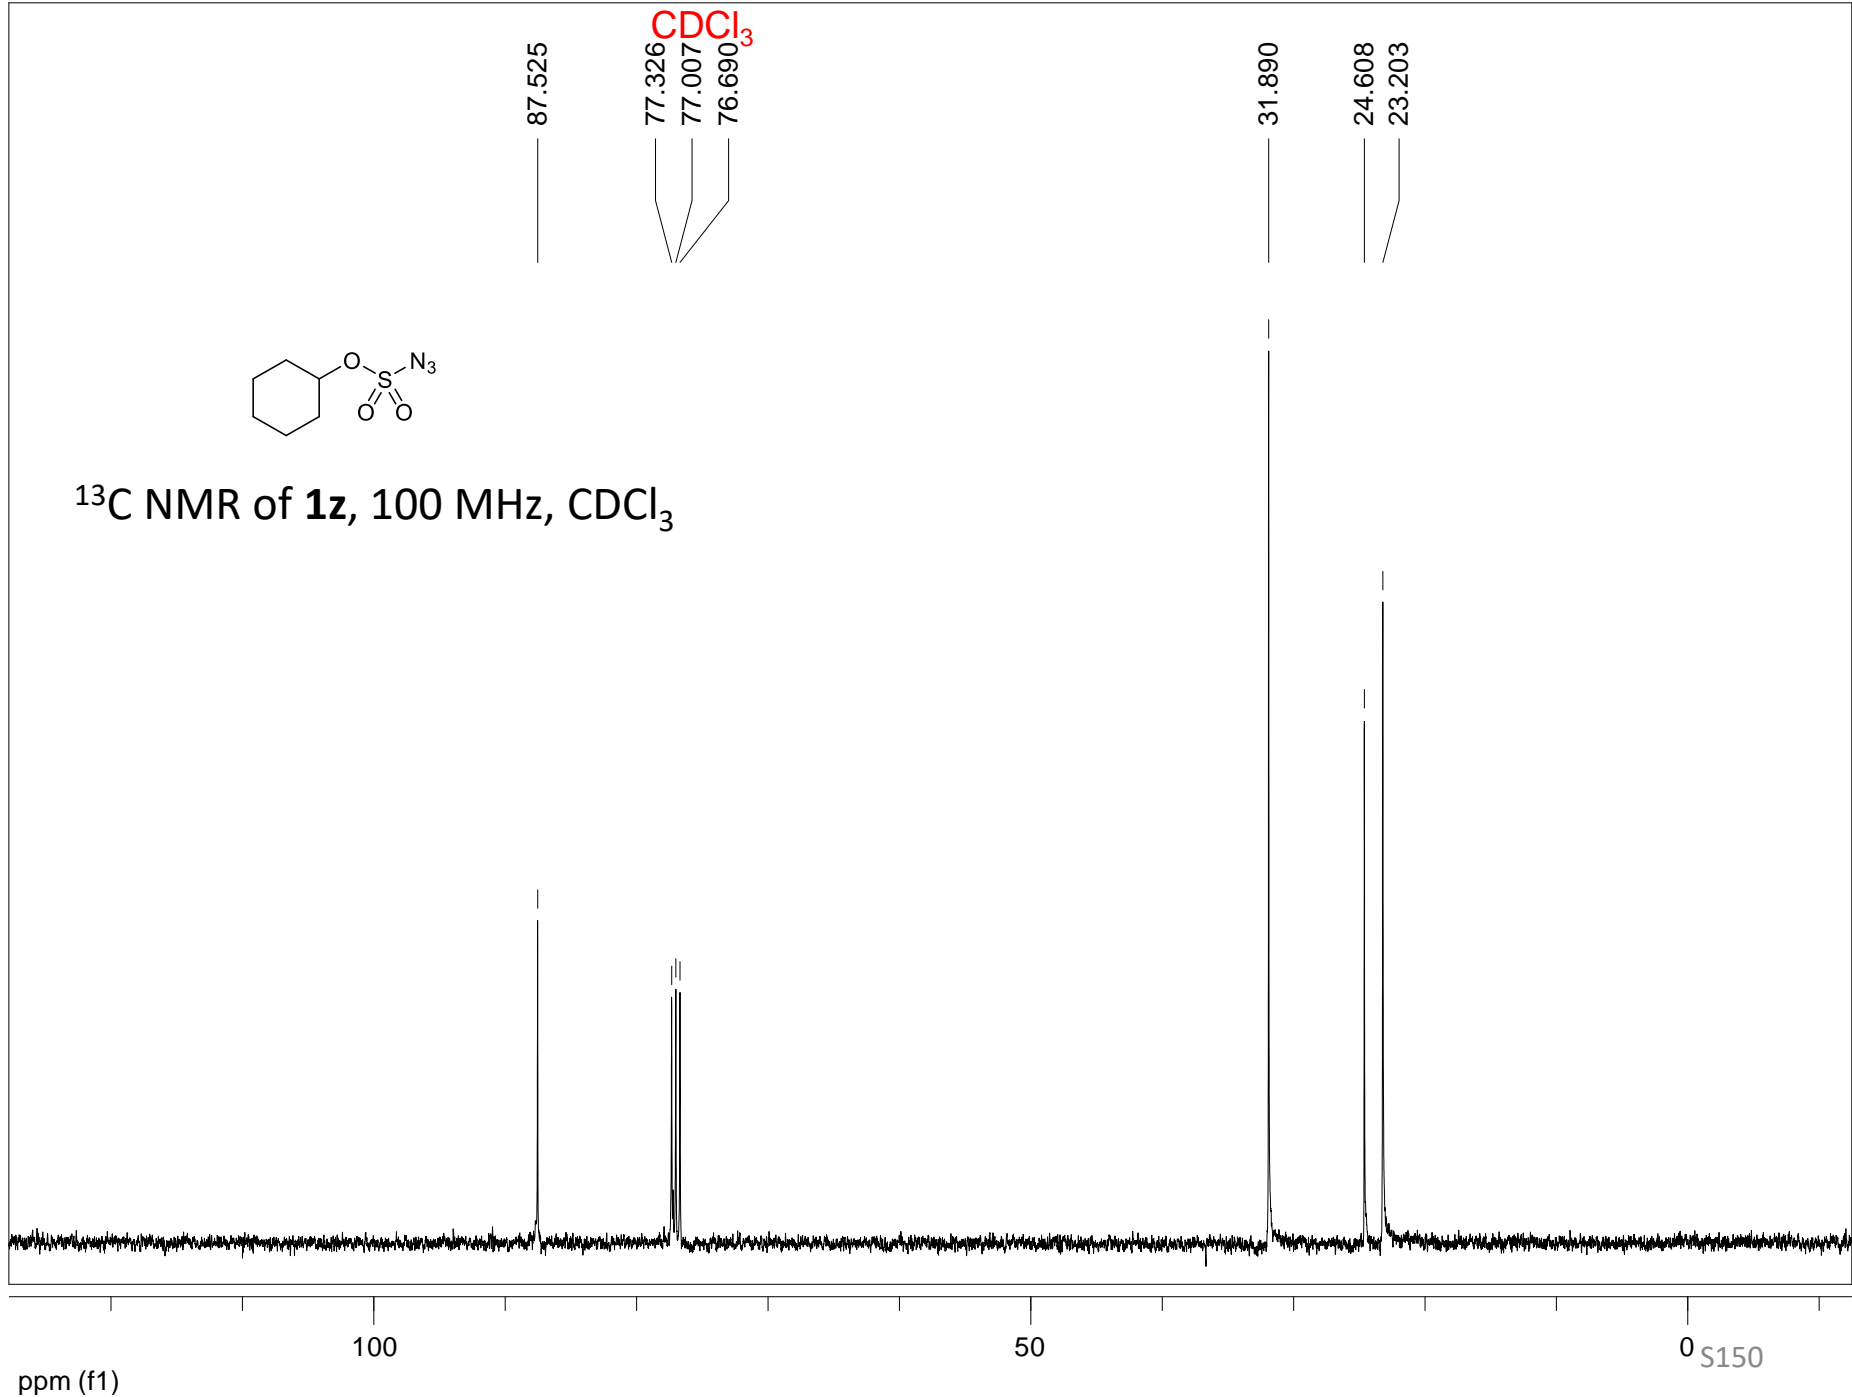

CHCl<sub>3</sub>

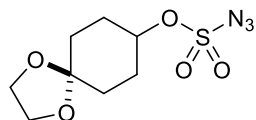

<sup>1</sup>H NMR of **1aa**, 400 MHz, CDCl<sub>3</sub>

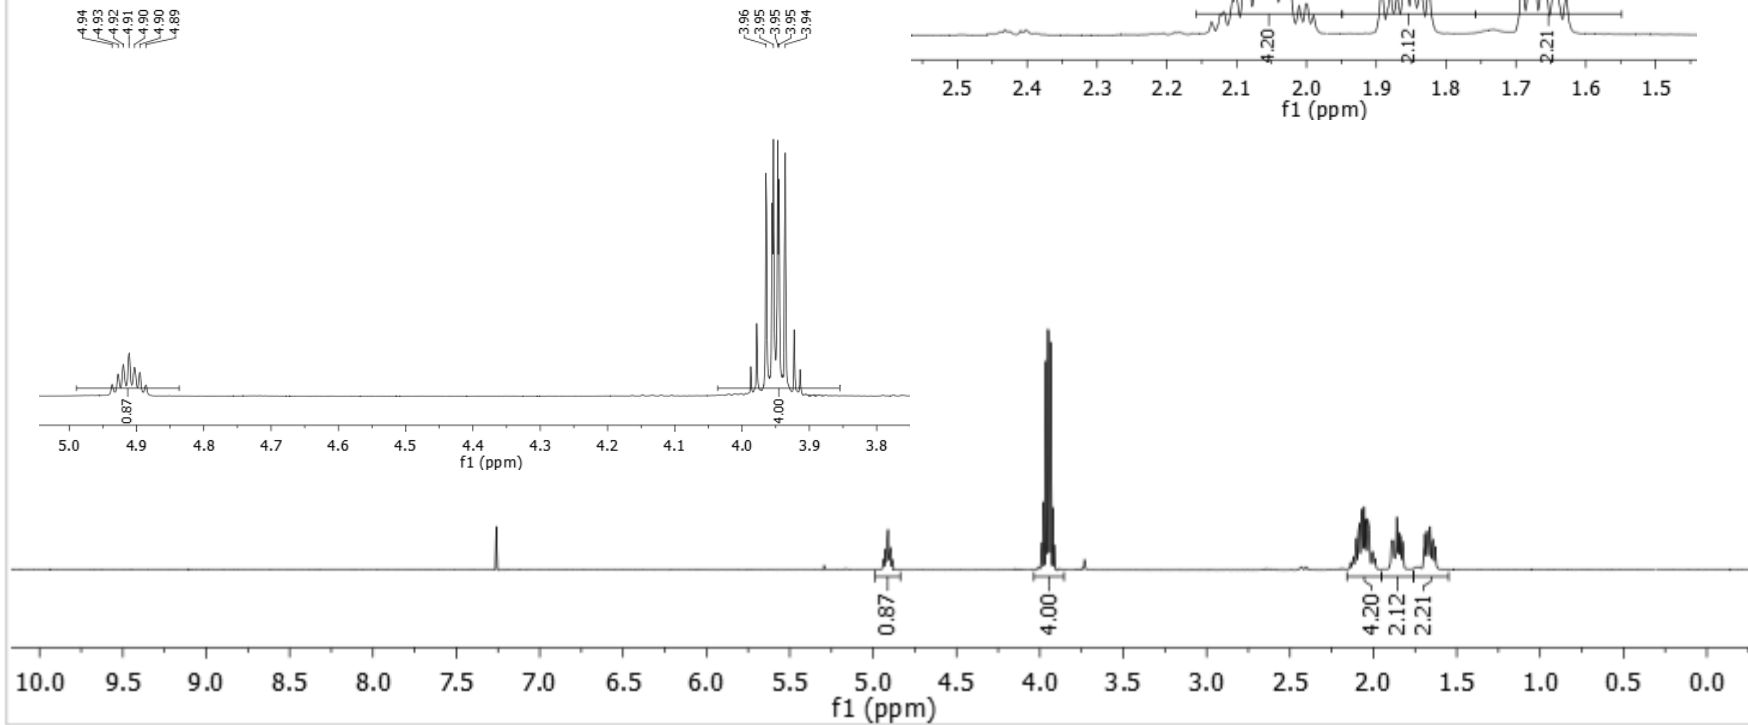



CDCl<sub>3</sub>

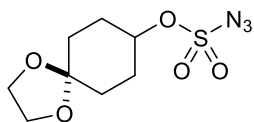

<sup>13</sup>C NMR of **1aa**, 100 MHz, CDCl<sub>3</sub>

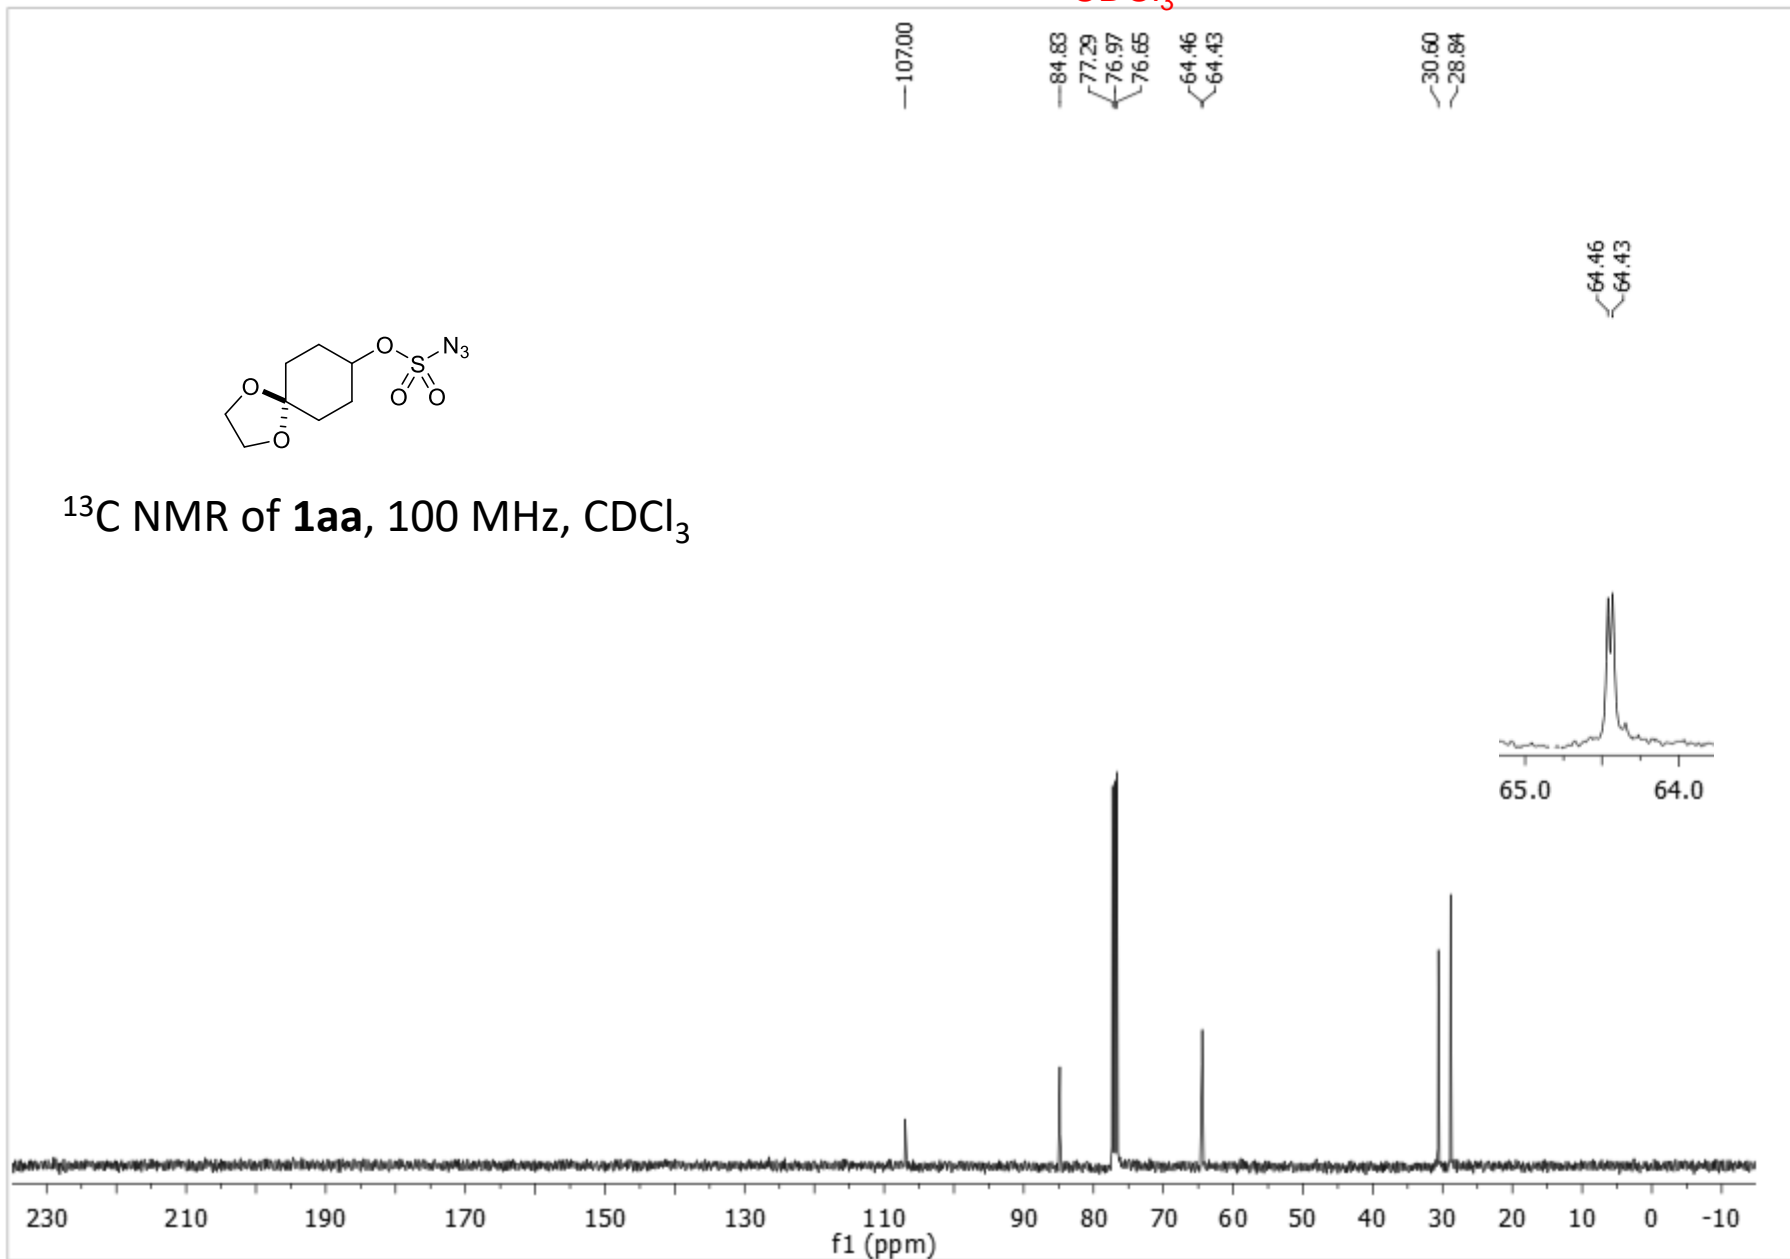

CHCl<sub>3</sub>

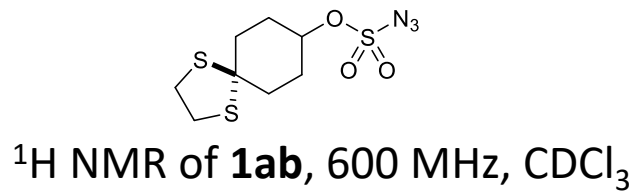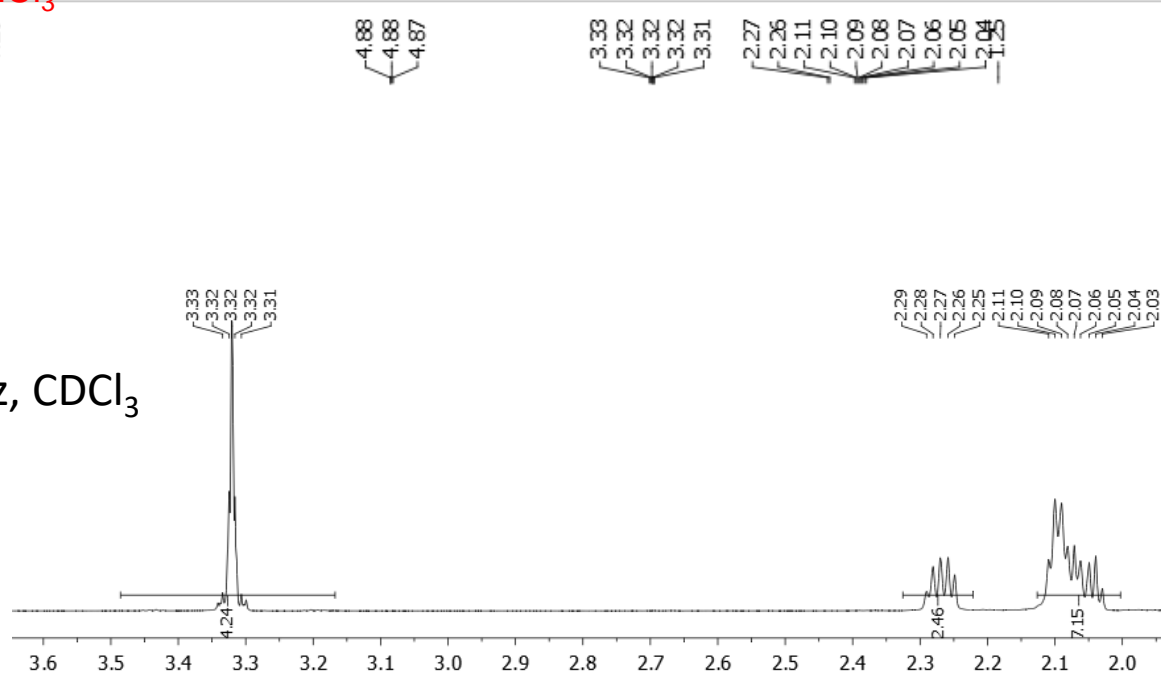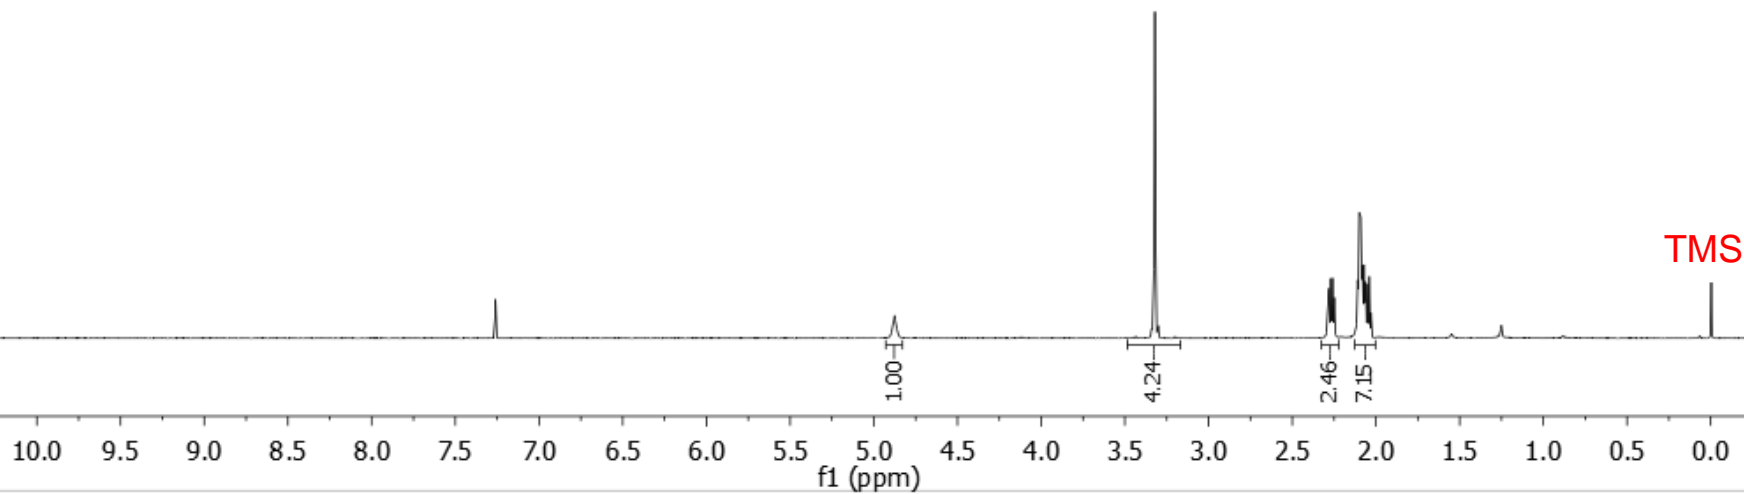

CDCl<sub>3</sub>

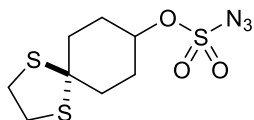

<sup>13</sup>C NMR of **1ab**, 150 MHz, CDCl<sub>3</sub>

38.88  
38.79  
38.30

31.15

84.55  
77.37  
77.16  
76.95  
66.46  
38.88  
38.79  
38.30  
31.15

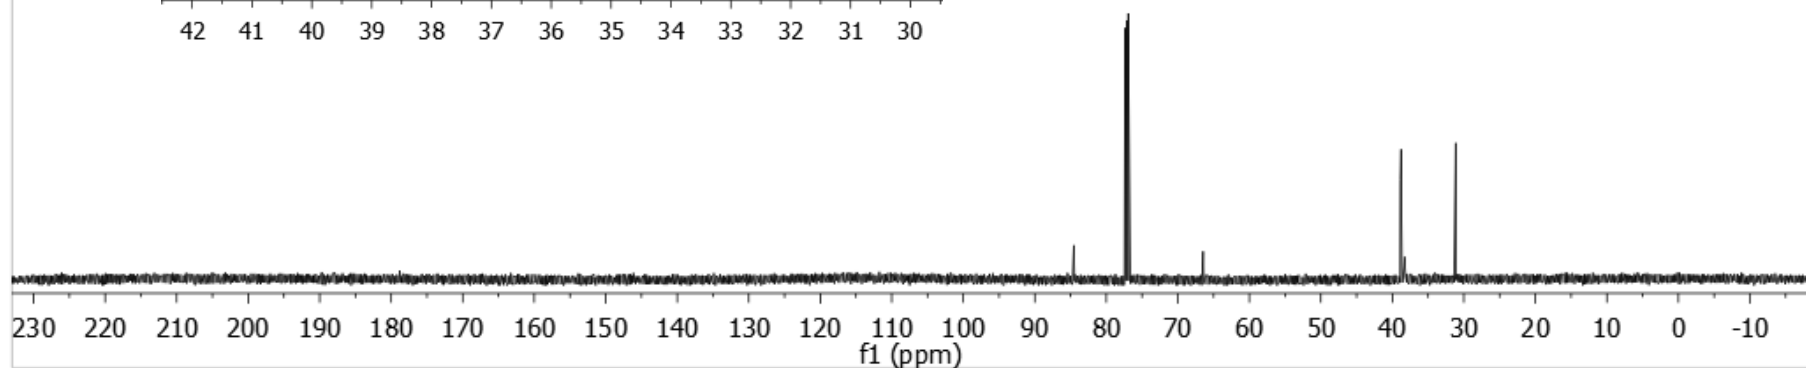

CHCl<sub>3</sub>

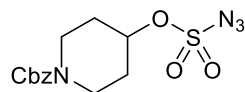

<sup>1</sup>H NMR of **1ac**, 400 MHz, CDCl<sub>3</sub>

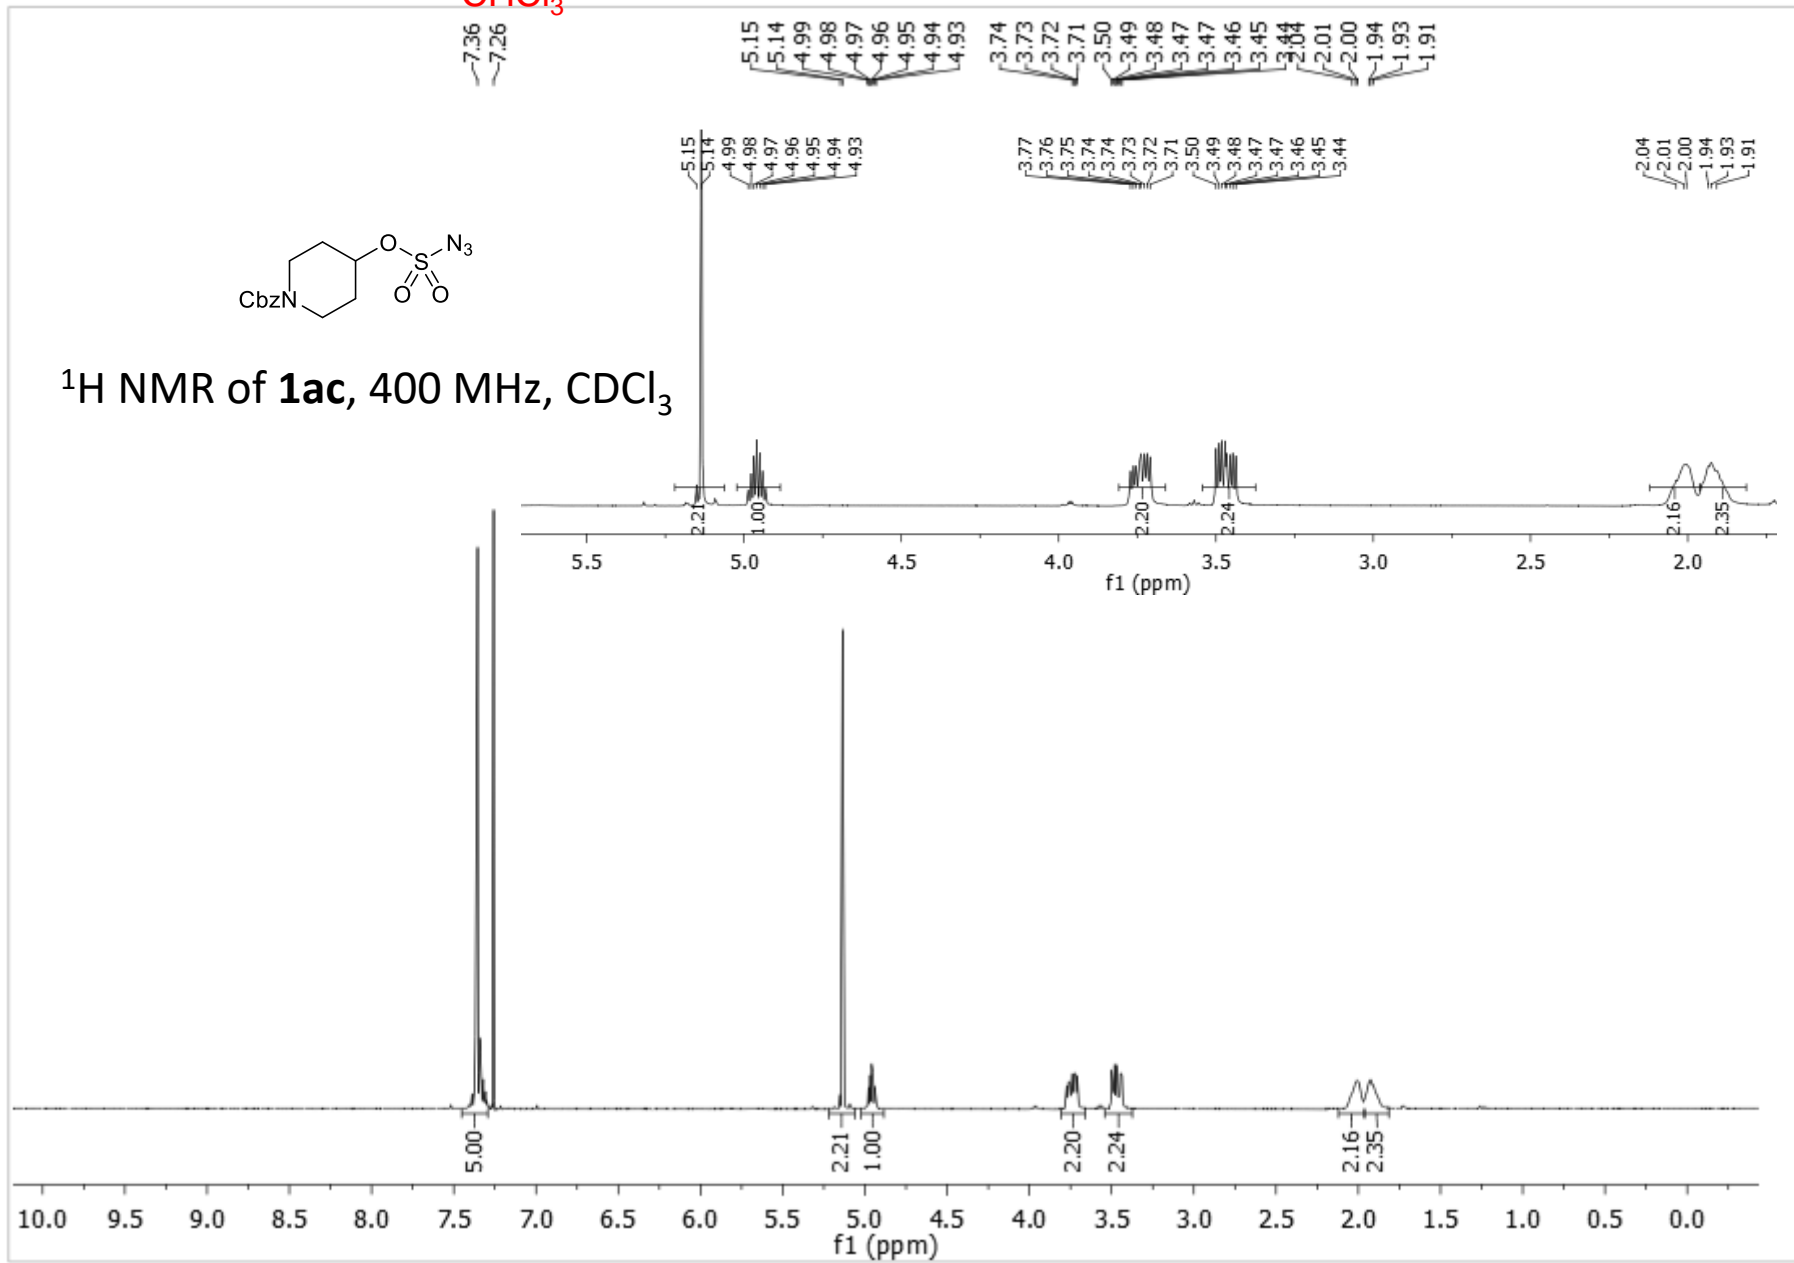

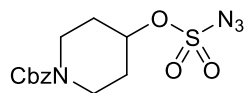

$^{13}\text{C}$  NMR of **1ac**, 100 MHz,  $\text{CDCl}_3$

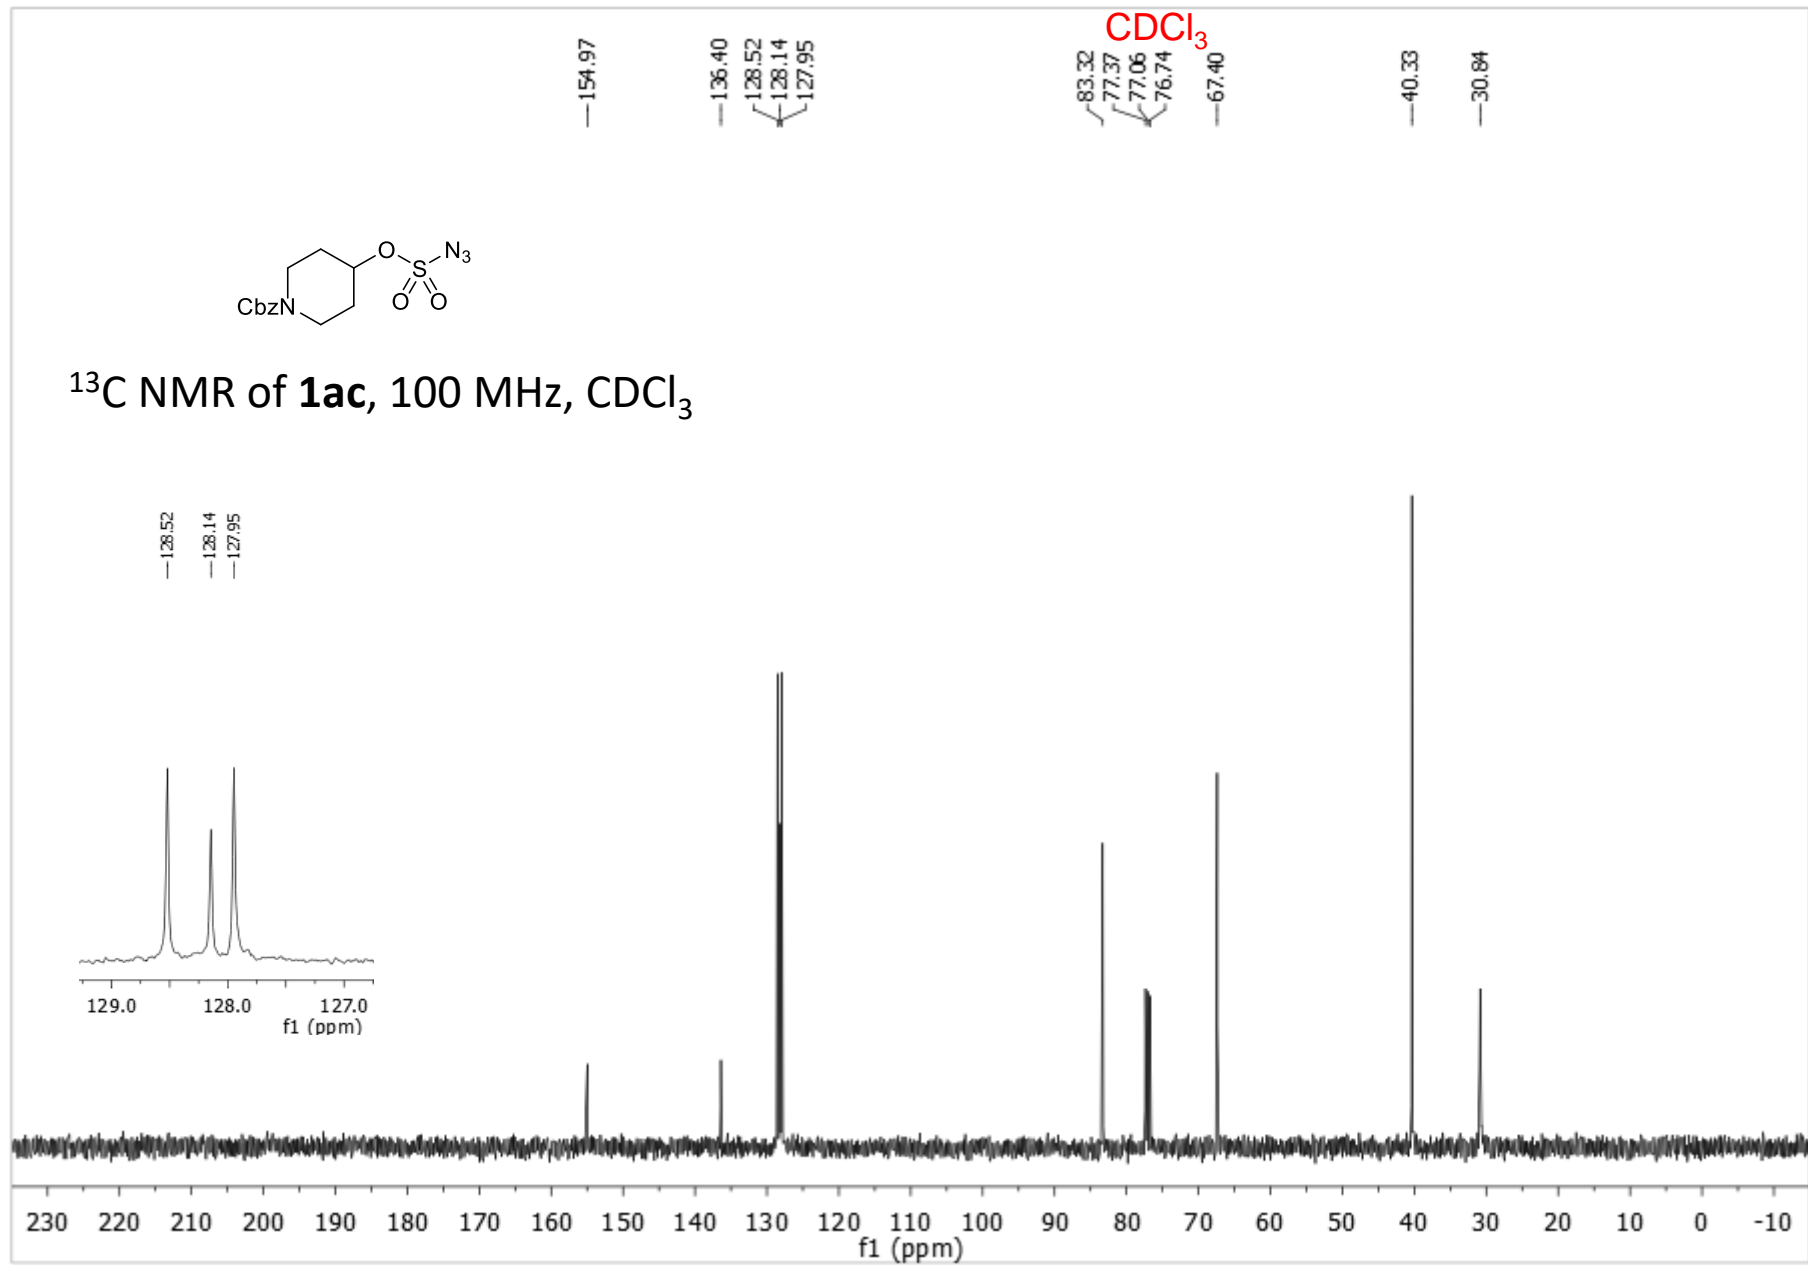

CHCl<sub>3</sub>

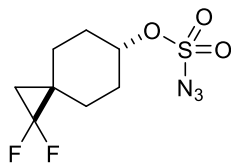

### <sup>1</sup>H NMR of **1ad**, 500 MHz, CDCl<sub>3</sub>

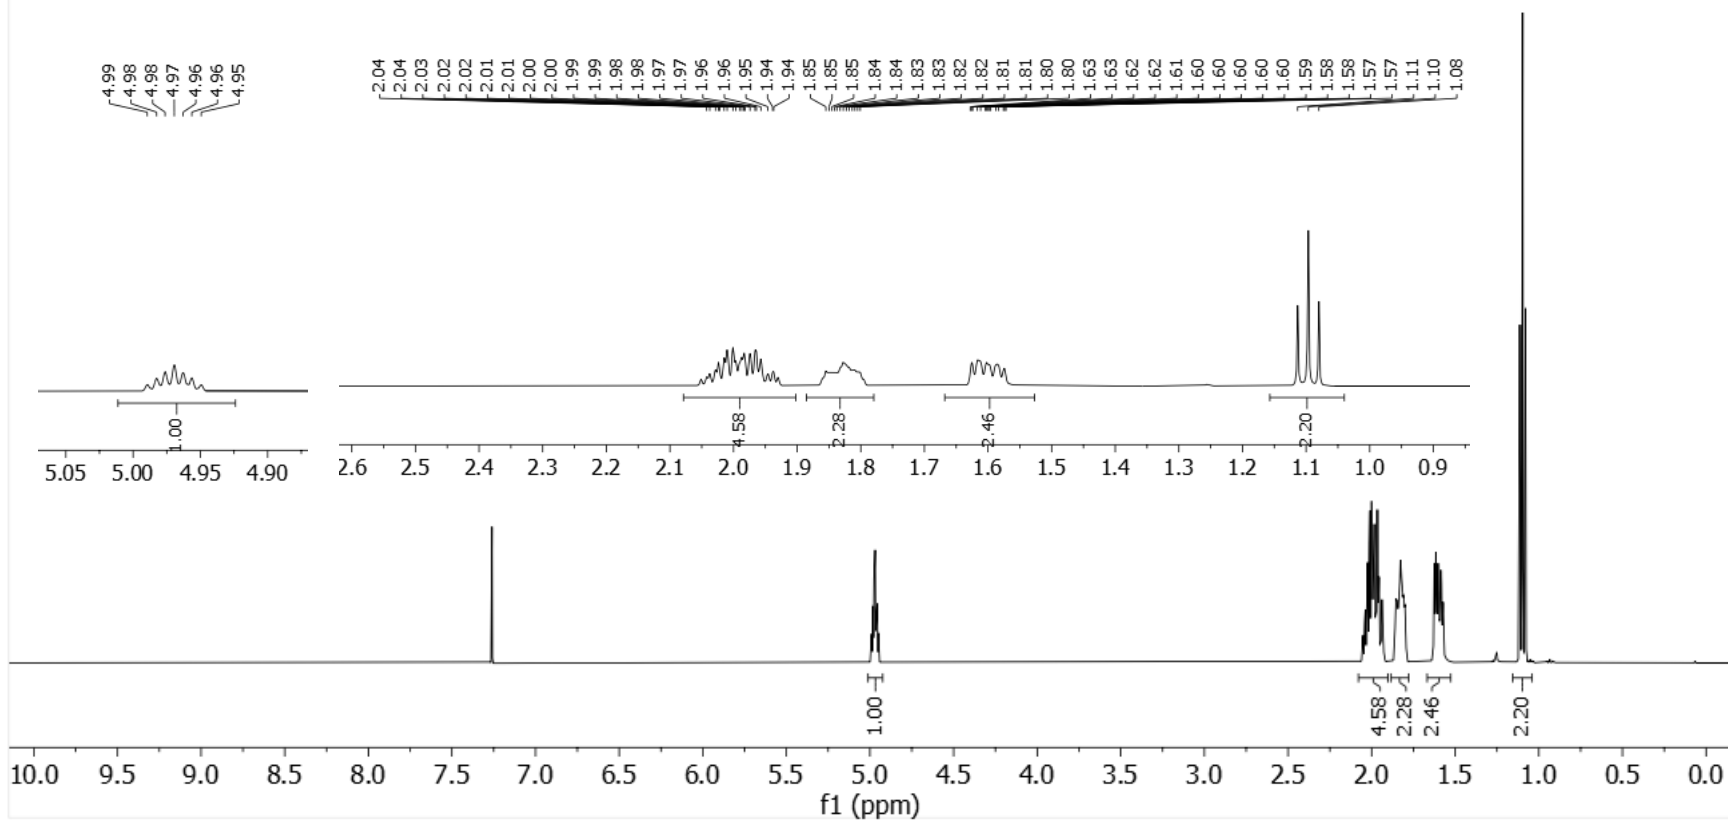



$^{13}\text{C}$  NMR of **1ad**, 125 MHz,  $\text{CDCl}_3$

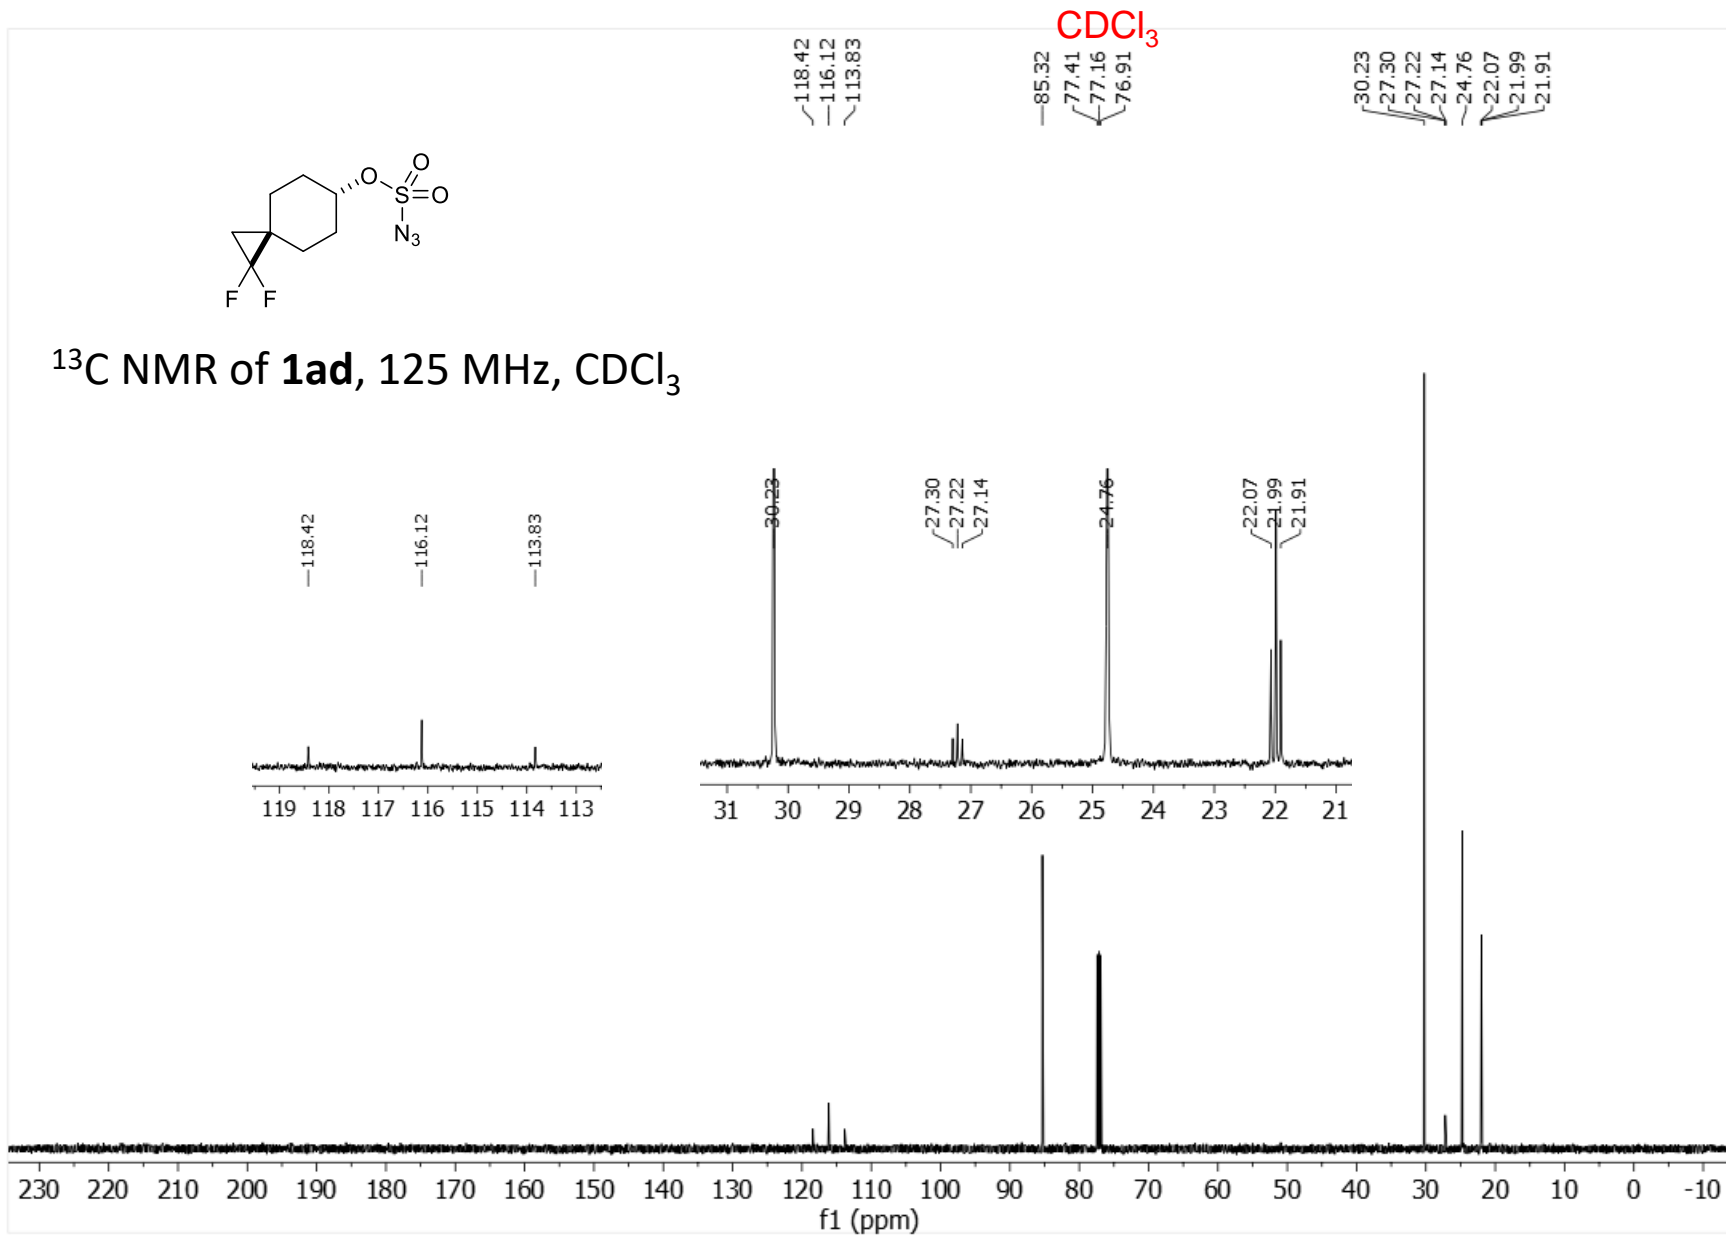

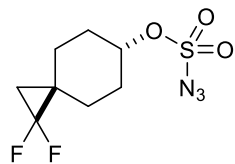

$^{19}\text{F}$  NMR of **1ad**, 470 MHz,  $\text{CDCl}_3$

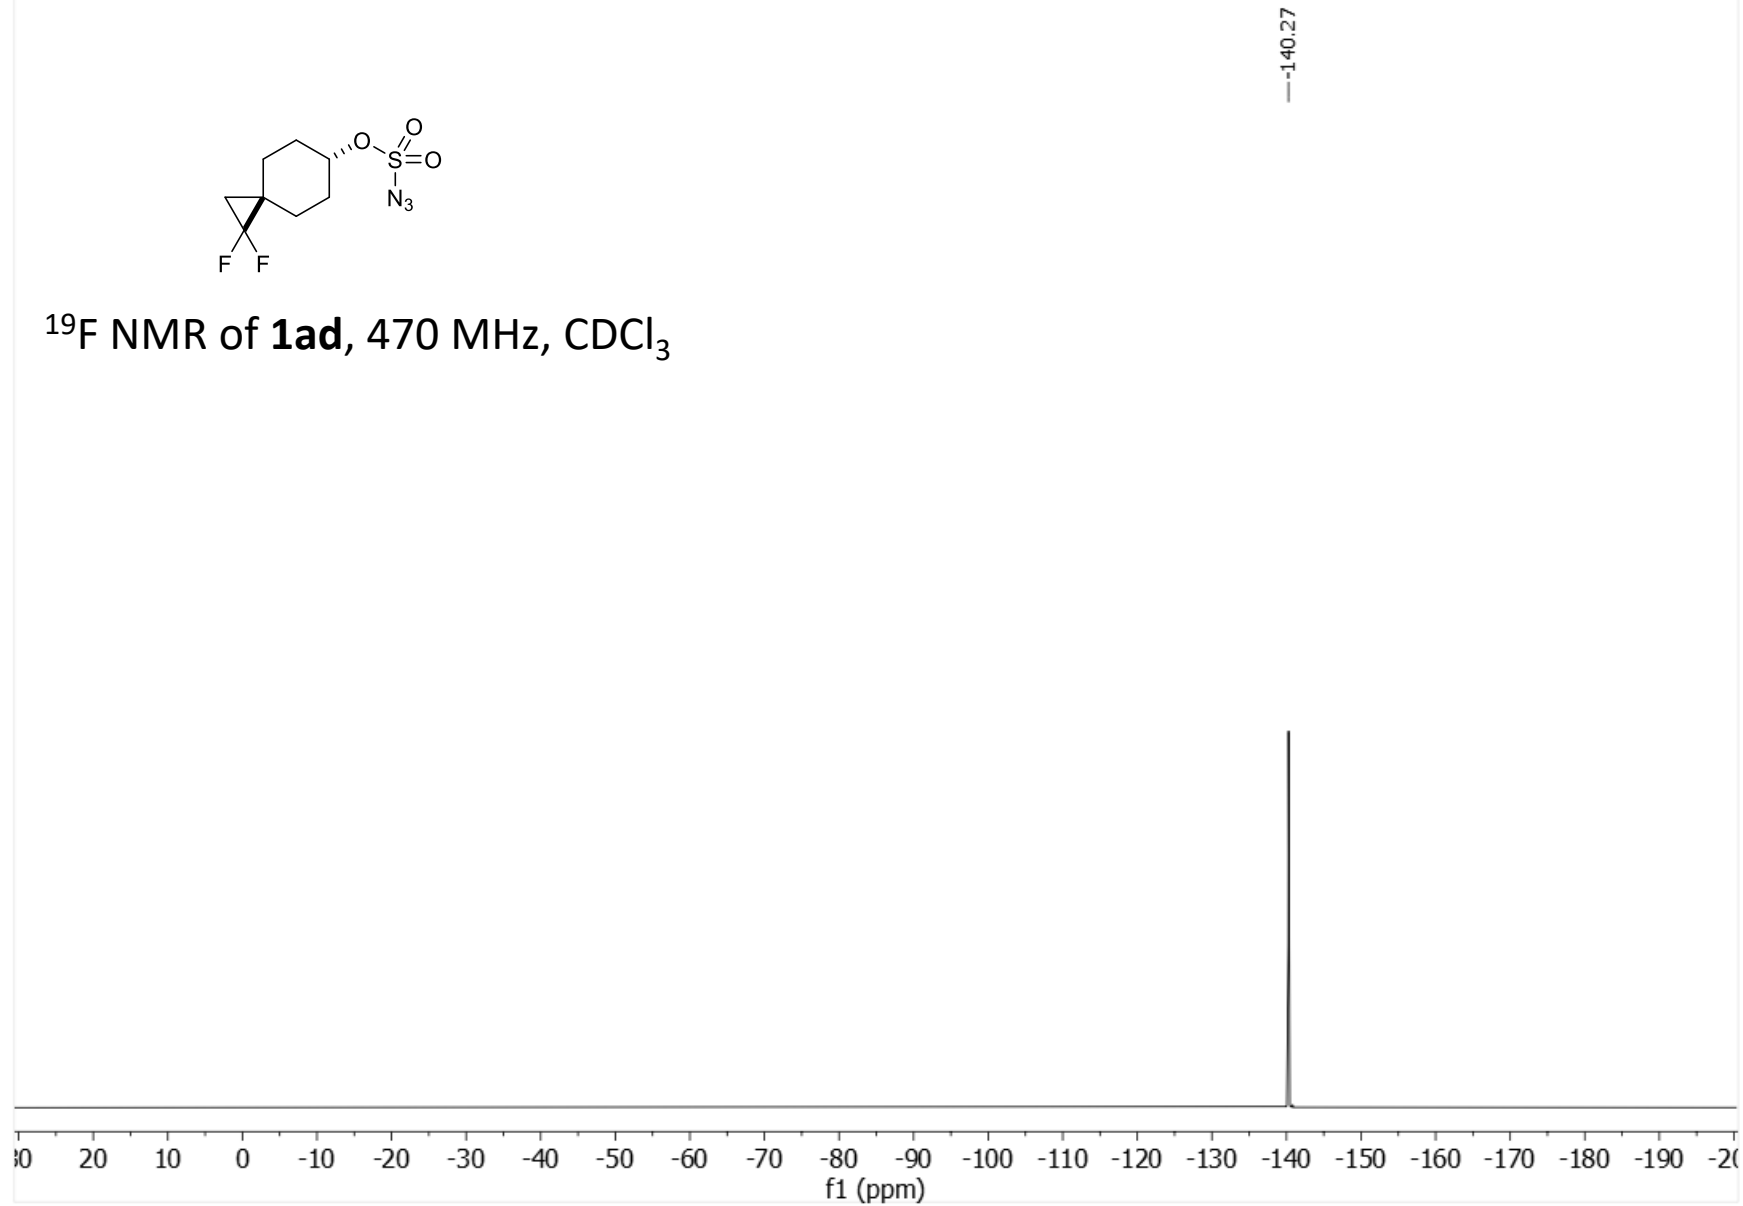



CHCl<sub>3</sub>

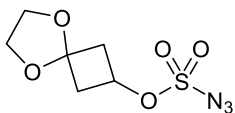

-7.26

<sup>1</sup>H NMR of **1ae**, 600 MHz, CDCl<sub>3</sub>

5.01  
5.00  
5.00  
4.99  
4.98  
4.98  
4.97

3.91  
2.85  
2.85  
2.84  
2.84  
2.84  
2.83  
2.83  
2.82  
2.82  
2.78  
2.78  
2.77  
2.77  
2.77  
2.76  
2.76  
2.75  
2.75

2.85  
2.85  
2.84  
2.84  
2.84  
2.83  
2.83  
2.82  
2.82  
2.81  
2.79  
2.78  
2.78  
2.78  
2.77  
2.77  
2.77  
2.76  
2.76  
2.75  
2.75

5.01  
5.00  
5.00  
4.99  
4.98  
4.98  
4.97

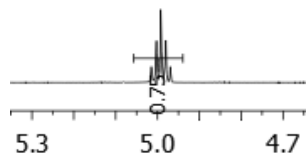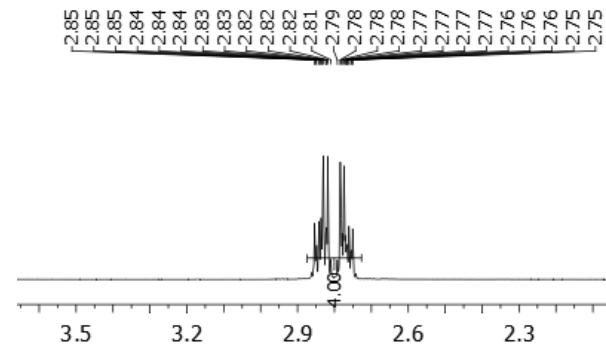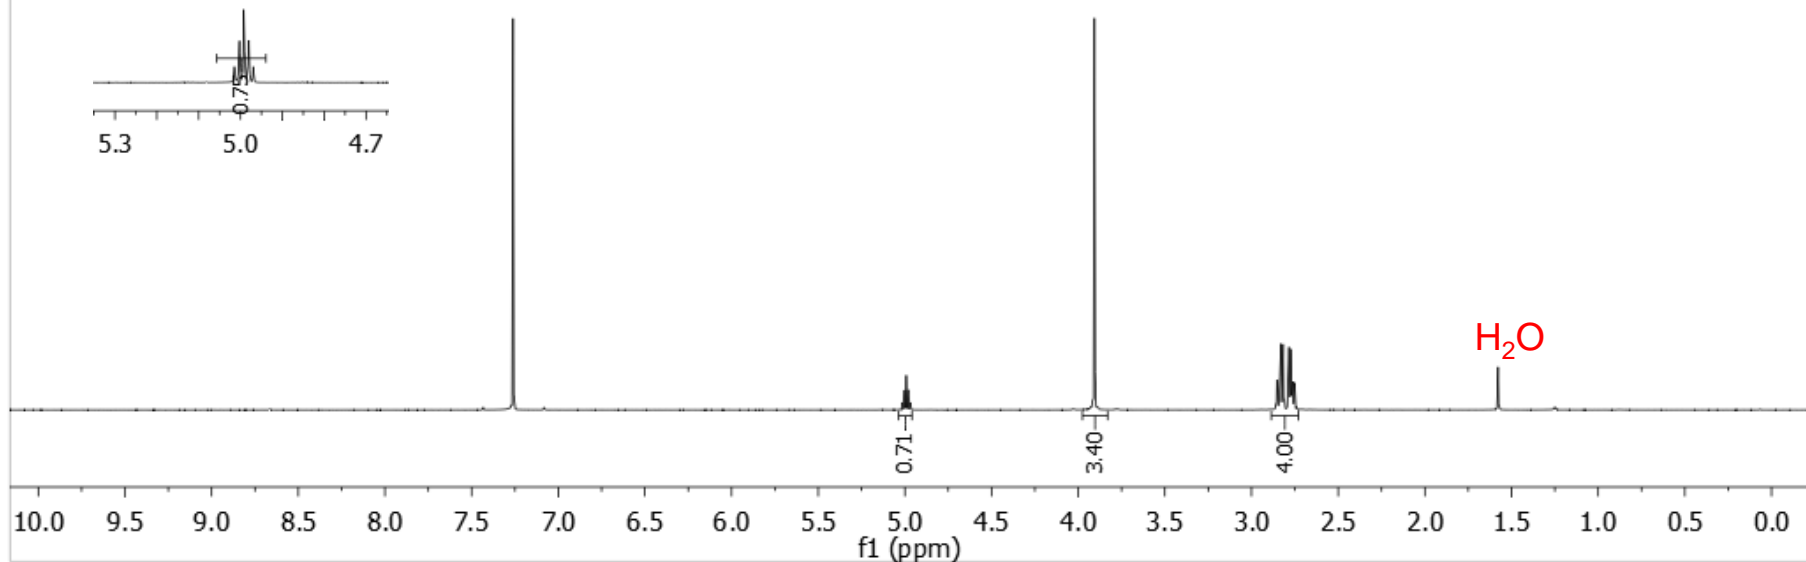

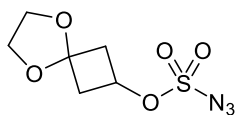

$^{13}\text{C}$  NMR of **1ae**, 150 MHz,  $\text{CDCl}_3$

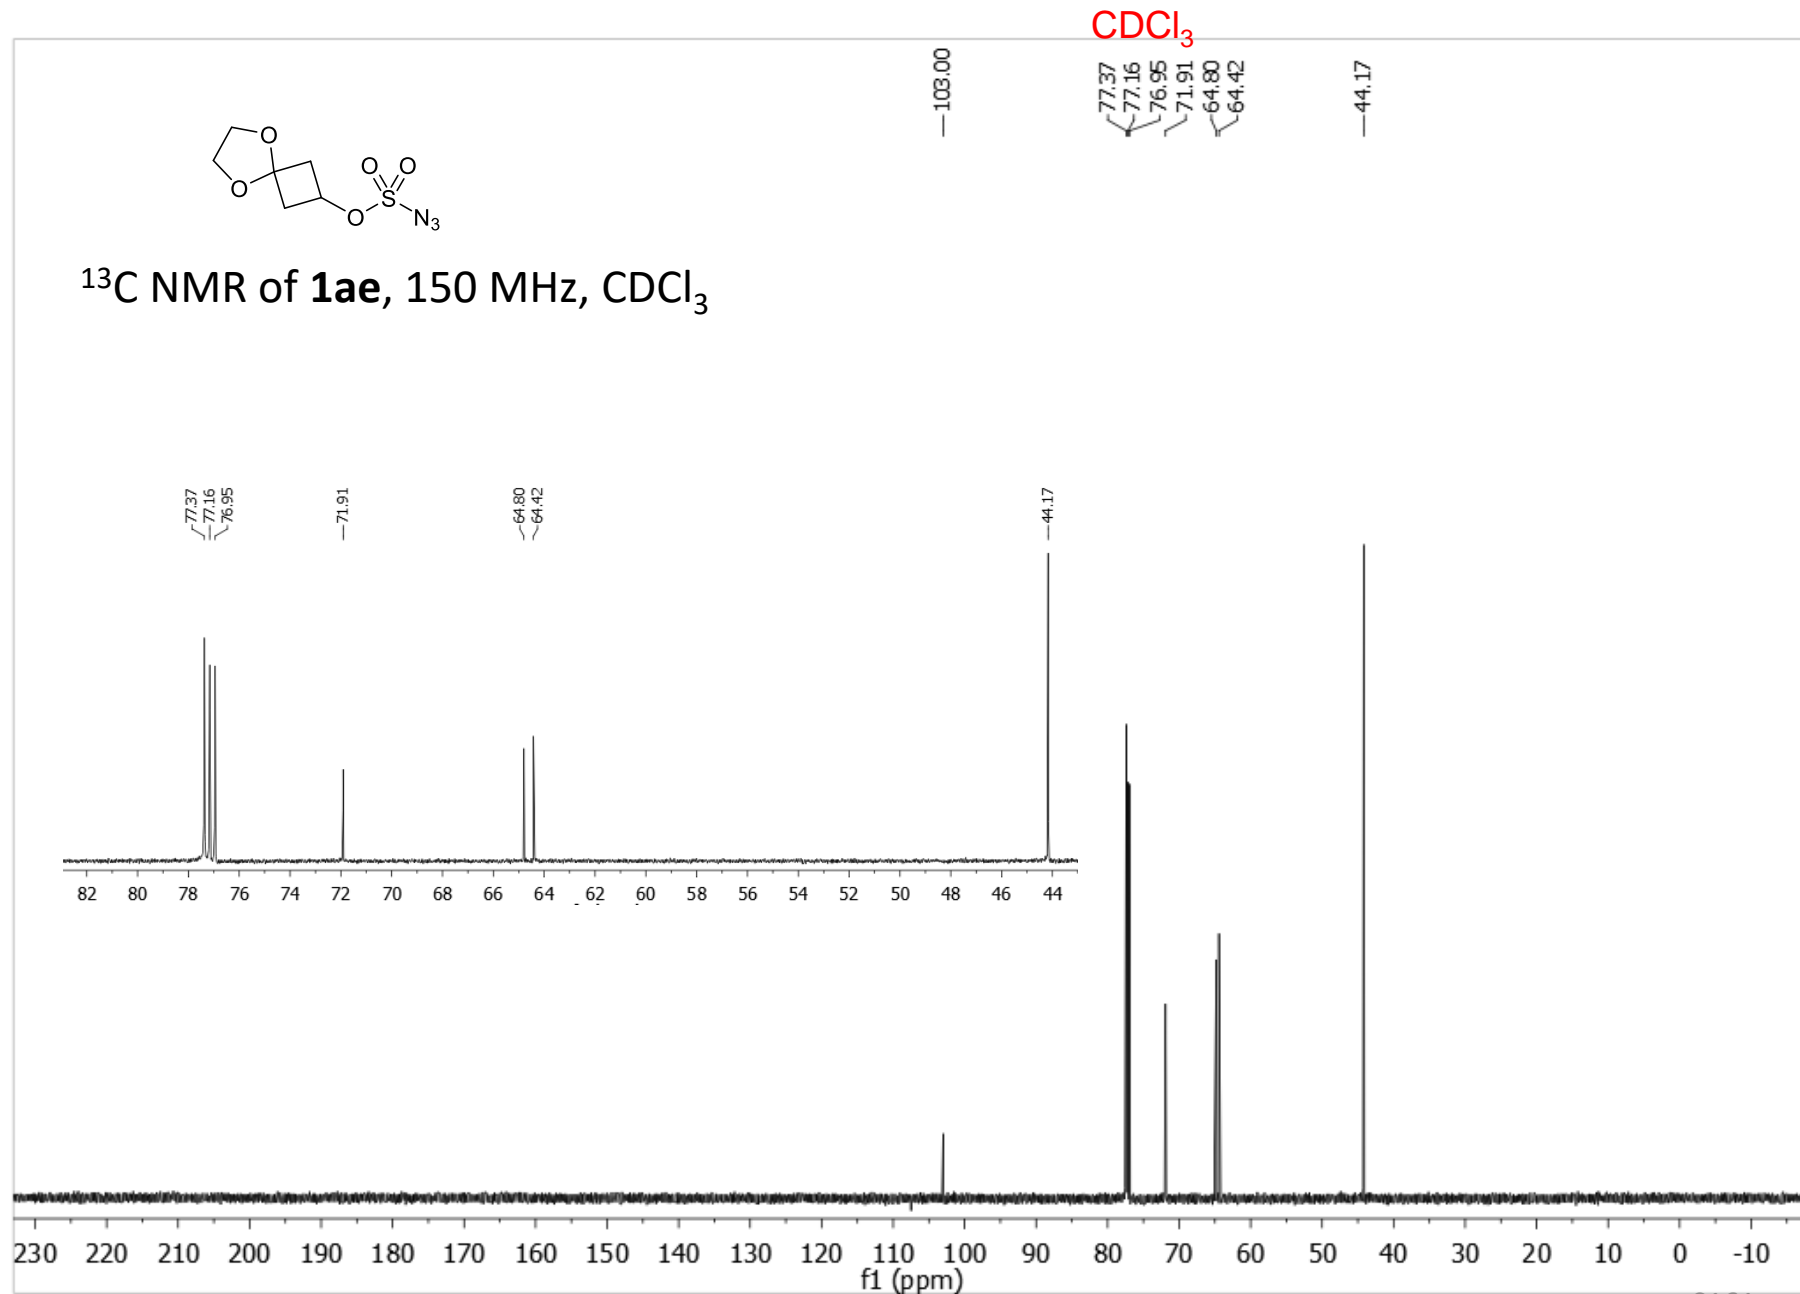

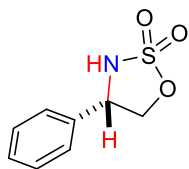

$^1\text{H}$  NMR of **2a**, 500 MHz,  $\text{CDCl}_3$

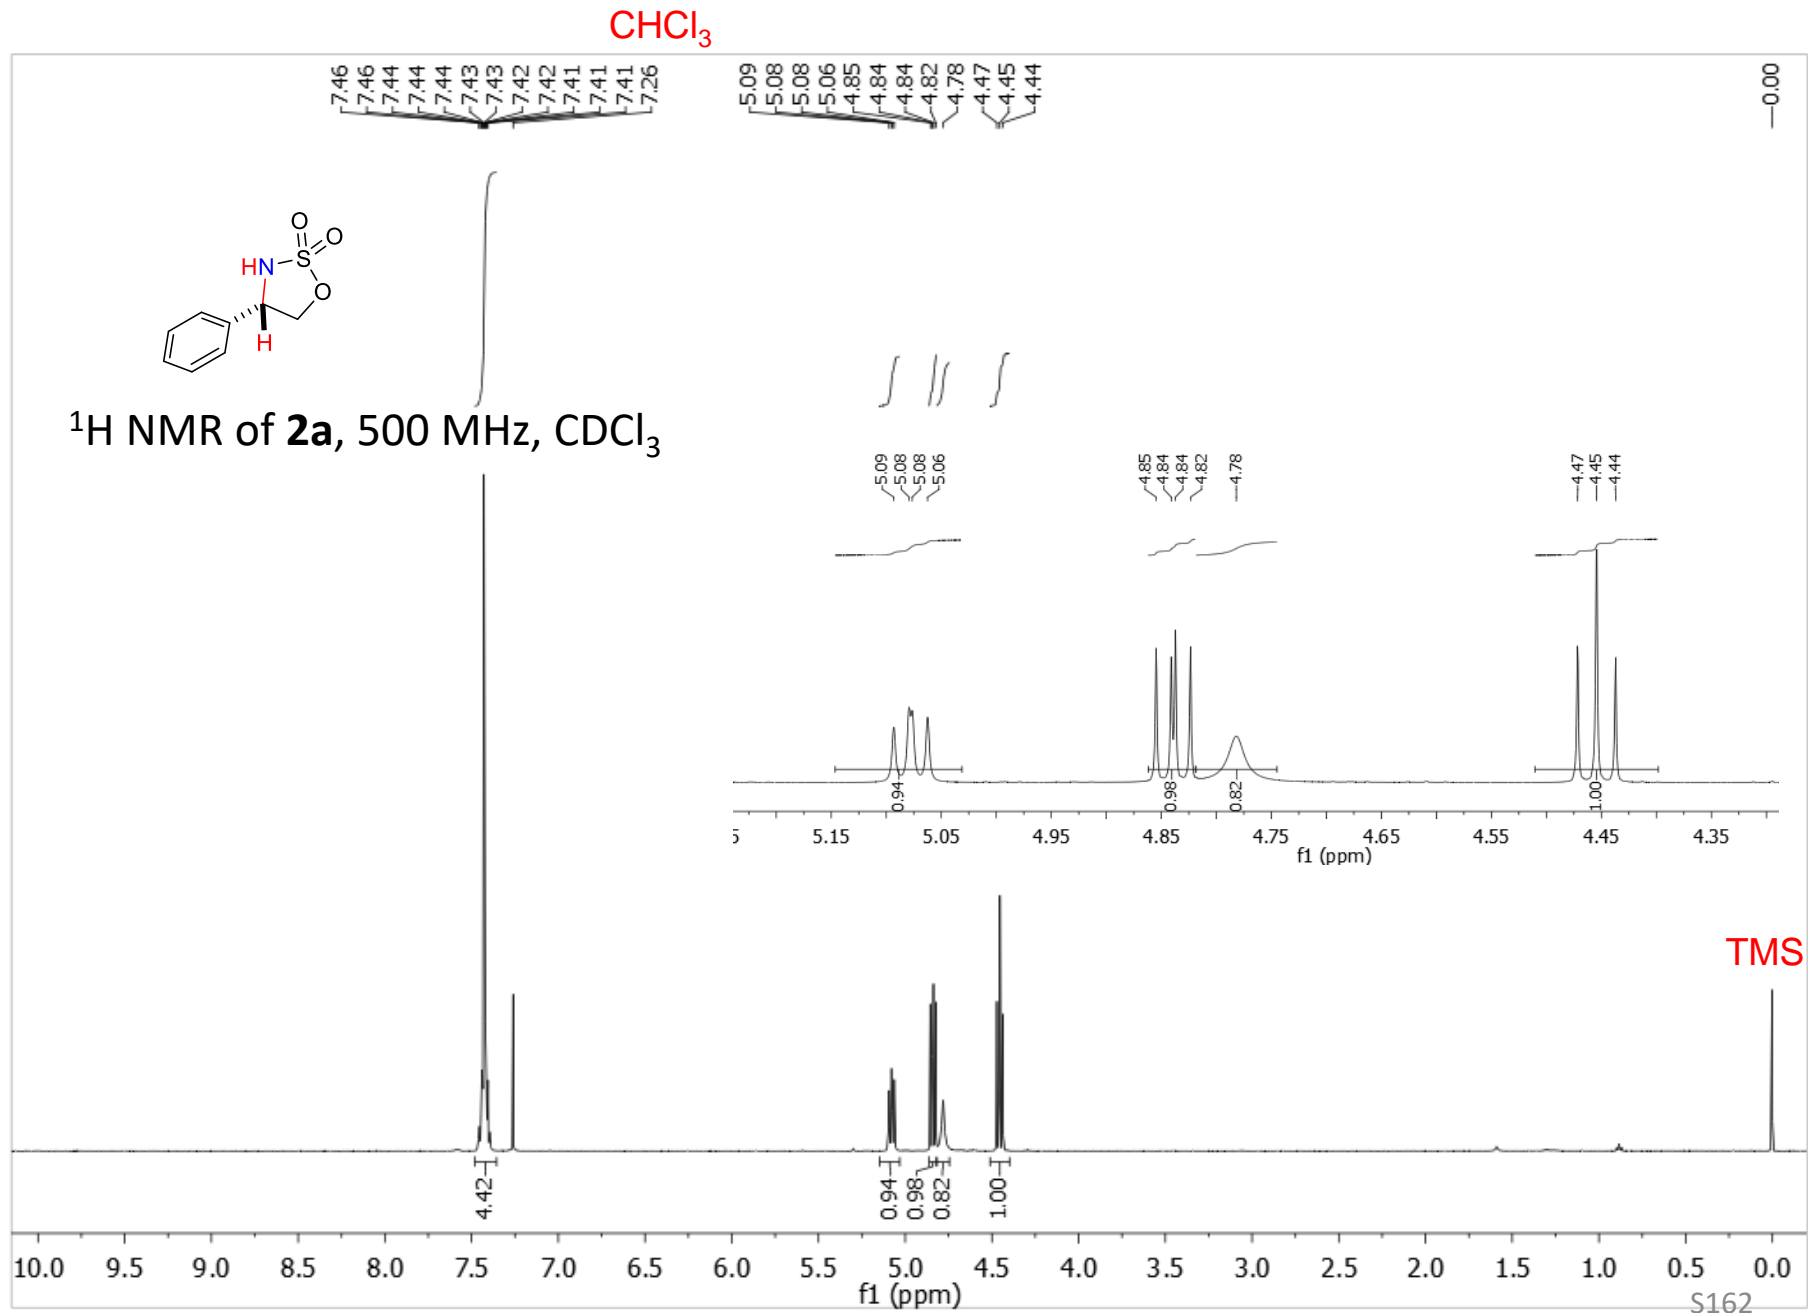

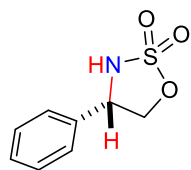

$^{13}\text{C}$  NMR of **2a**, 150 MHz,  $\text{CDCl}_3$

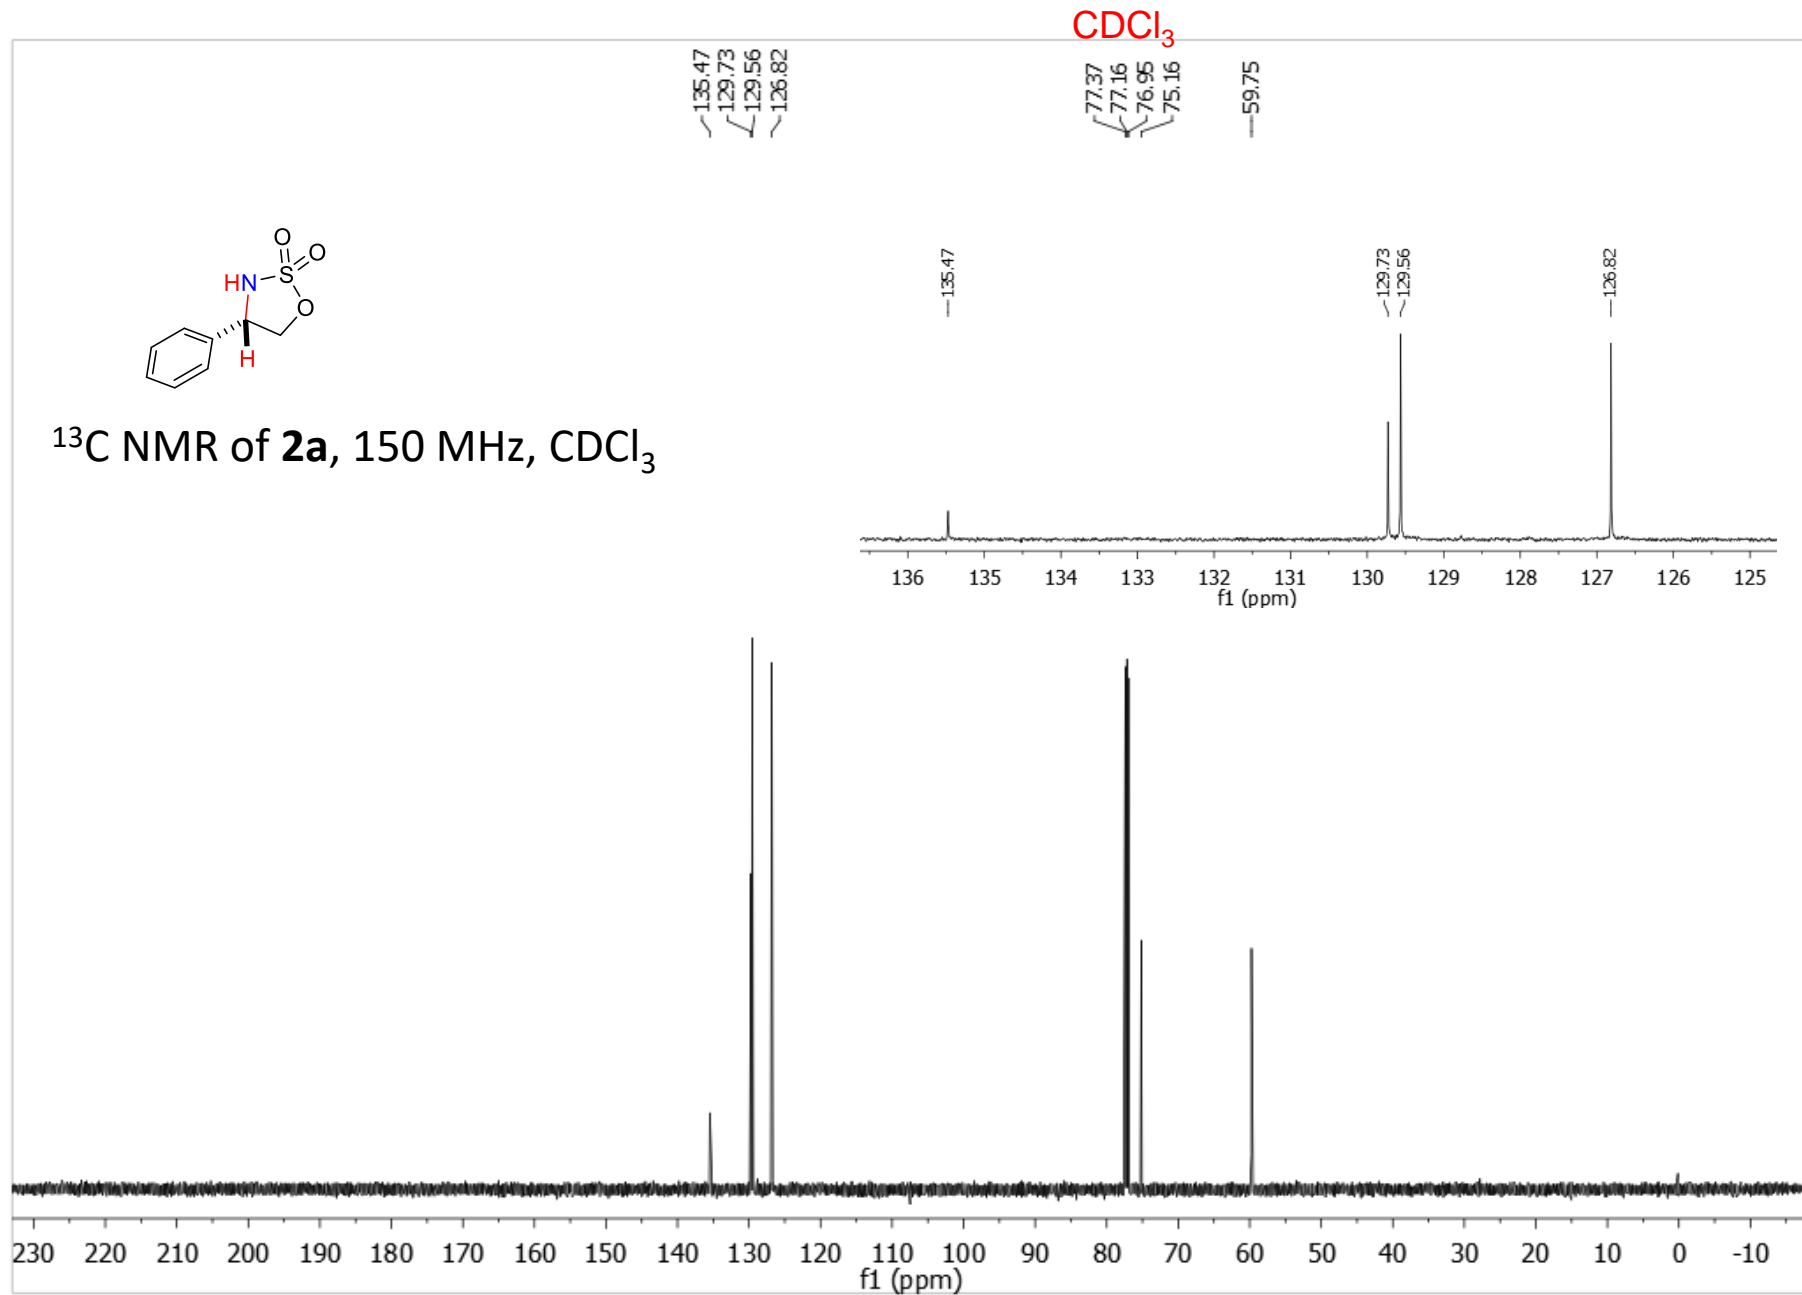

C:\EZStart\Projects\Default\Data\K0L-350-ADH-10%  
C:\Documents and Settings\zhang\Desktop\DSW\0210.met

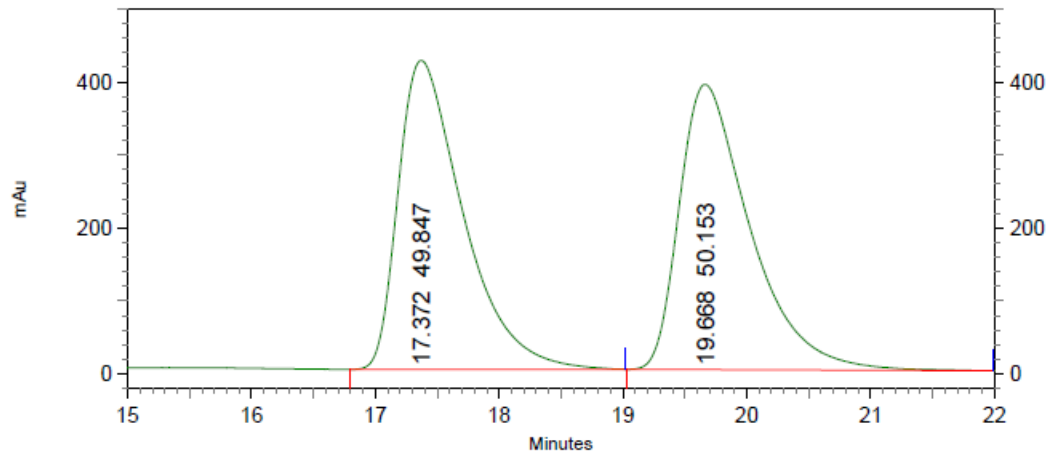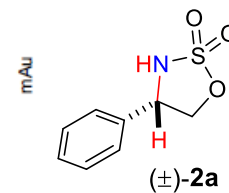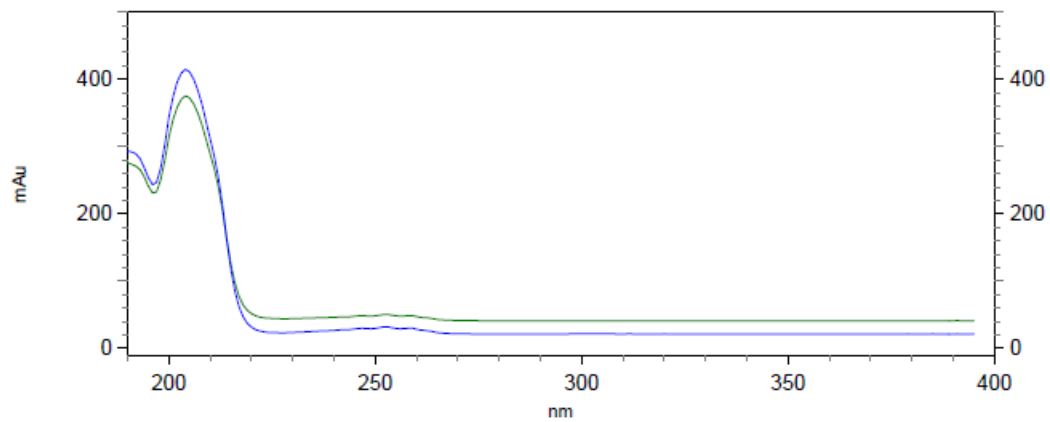

5: 208 nm, 4  
nm Results

| Pk # | Retention Time | Area Percent |
|------|----------------|--------------|
| 1    | 17.372         | 49.847       |
| 2    | 19.668         | 50.153       |

|        |         |
|--------|---------|
| Totals | 100.000 |
|--------|---------|

C:\EZStart\Projects\Default\Data\K0L-349ADH-10%  
C:\Documents and Settings\zhang\Desktop\DSW\0210.met

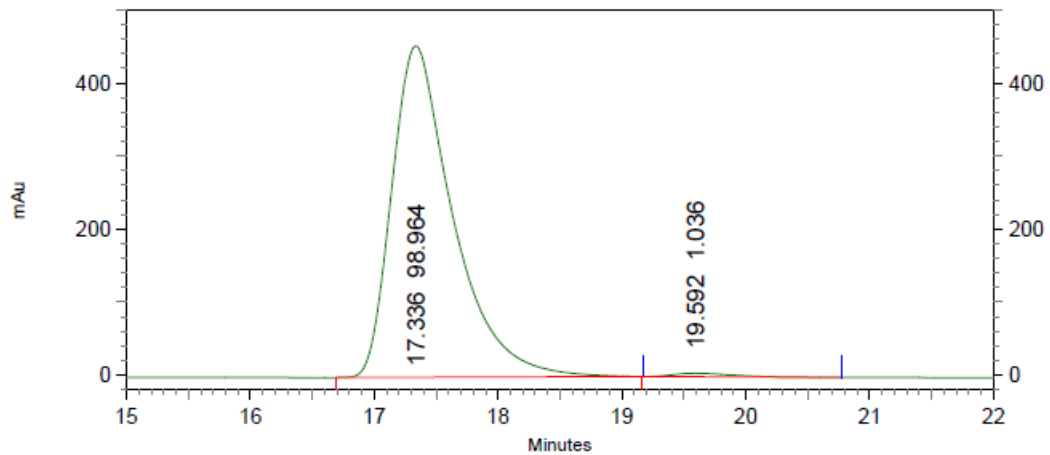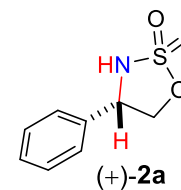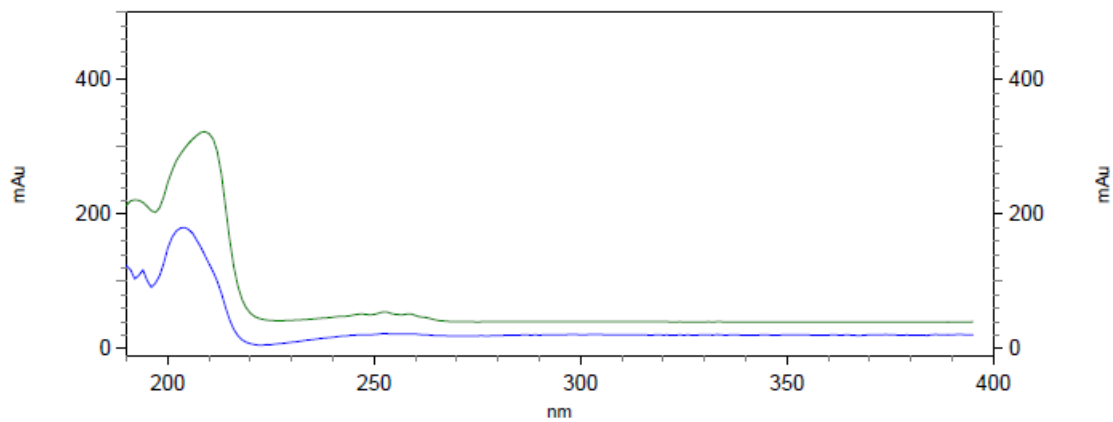

5: 221 nm, 4  
nm Results

| Pk # | Retention Time | Area Percent |
|------|----------------|--------------|
| 1    | 17.336         | 98.964       |
| 2    | 19.592         | 1.036        |

|        |  |         |
|--------|--|---------|
| Totals |  | 100.000 |
|--------|--|---------|

## checkCIF/PLATON report

Structure factors have been supplied for datablock(s) C8H9NO3S

THIS REPORT IS FOR GUIDANCE ONLY. IF USED AS PART OF A REVIEW PROCEDURE FOR PUBLICATION, IT SHOULD NOT REPLACE THE EXPERTISE OF AN EXPERIENCED CRYSTALLOGRAPHIC REFEREE.

No syntax errors found. CIF dictionary Interpreting this report

### Datablock: C8H9NO3S

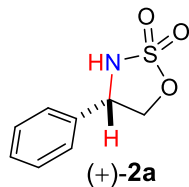

Bond precision: C-C = 0.0030 Å      Wavelength=1.54178  
Cell:            a=4.7540(2)      b=11.9215(4)      c=15.2976(5)  
                  alpha=90      beta=90      gamma=90  
Temperature:    100 K

|                        | Calculated   | Reported     |
|------------------------|--------------|--------------|
| Volume                 | 866.99(5)    | 866.99(5)    |
| Space group            | P 21 21 21   | P 21 21 21   |
| Hall group             | P 2ac 2ab    | P 2ac 2ab    |
| Moiety formula         | C8 H9 N O3 S | C8 H9 N O3 S |
| Sum formula            | C8 H9 N O3 S | C8 H9 N O3 S |
| Mr                     | 199.22       | 199.22       |
| Dx, g cm <sup>-3</sup> | 1.526        | 1.526        |
| Z                      | 4            | 4            |
| Mu (mm <sup>-1</sup> ) | 3.128        | 3.128        |
| F000                   | 416.0        | 416.0        |
| F000'                  | 418.58       |              |
| h, k, lmax             | 5, 14, 18    | 5, 14, 18    |
| Nref                   | 1660 [ 1002] | 1637         |
| Tmin, Tmax             | 0.467, 0.666 | 0.585, 0.753 |
| Tmin'                  | 0.206        |              |

Correction method= # Reported T Limits: Tmin=0.585 Tmax=0.753  
AbsCorr = MULTI-SCAN

Data completeness= 1.63/0.99      Theta(max)= 70.187

R(reflections)= 0.0228( 1625)      wR2(reflections)= 0.0616( 1637)

S = 1.094      Npar= 121

The following ALERTS were generated. Each ALERT has the format  
test-name\_ALERT\_alert-type\_alert-level.  
Click on the hyperlinks for more details of the test.

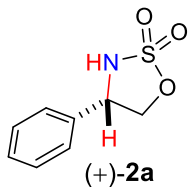

### Alert level G

|                   |                                                  |       |        |
|-------------------|--------------------------------------------------|-------|--------|
| PLAT002_ALERT_2_G | Number of Distance or Angle Restraints on AtSite | 2     | Note   |
| PLAT172_ALERT_4_G | The CIF-Embedded .res File Contains DFIX Records | 1     | Report |
| PLAT395_ALERT_2_G | Deviating X-O-Y Angle From 120 for O1            | 109.9 | Degree |
| PLAT791_ALERT_4_G | Model has Chirality at C2 (Chiral SPGR)          | 5     | Verify |
| PLAT860_ALERT_3_G | Number of Least-Squares Restraints .....         | 1     | Note   |
| PLAT912_ALERT_4_G | Missing # of FCF Reflections Above STh/L= 0.600  | 8     | Note   |
| PLAT978_ALERT_2_G | Number C-C Bonds with Positive Residual Density. | 6     | Info   |

- 
- 0 ALERT level A = Most likely a serious problem - resolve or explain
  - 0 ALERT level B = A potentially serious problem, consider carefully
  - 0 ALERT level C = Check. Ensure it is not caused by an omission or oversight
  - 7 ALERT level G = General information/check it is not something unexpected

- 0 ALERT type 1 CIF construction/syntax error, inconsistent or missing data
  - 3 ALERT type 2 Indicator that the structure model may be wrong or deficient
  - 1 ALERT type 3 Indicator that the structure quality may be low
  - 3 ALERT type 4 Improvement, methodology, query or suggestion
  - 0 ALERT type 5 Informative message, check
- 

It is advisable to attempt to resolve as many as possible of the alerts in all categories. Often the minor alerts point to easily fixed oversights, errors and omissions in your CIF or refinement strategy, so attention to these fine details can be worthwhile. In order to resolve some of the more serious problems it may be necessary to carry out additional measurements or structure refinements. However, the purpose of your study may justify the reported deviations and the more serious of these should normally be commented upon in the discussion or experimental section of a paper or in the "special\_details" fields of the CIF. checkCIF was carefully designed to identify outliers and unusual parameters, but every test has its limitations and alerts that are not important in a particular case may appear. Conversely, the absence of alerts does not guarantee there are no aspects of the results needing attention. It is up to the individual to critically assess their own results and, if necessary, seek expert advice.

### Publication of your CIF in IUCr journals

A basic structural check has been run on your CIF. These basic checks will be run on all CIFs submitted for publication in IUCr journals (*Acta Crystallographica*, *Journal of Applied Crystallography*, *Journal of Synchrotron Radiation*); however, if you intend to submit to *Acta Crystallographica Section C* or *E* or *IUCrData*, you should make sure that full publication checks are run on the final version of your CIF prior to submission.

### Publication of your CIF in other journals

Please refer to the *Notes for Authors* of the relevant journal for any special instructions relating to CIF submission.



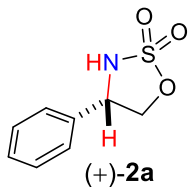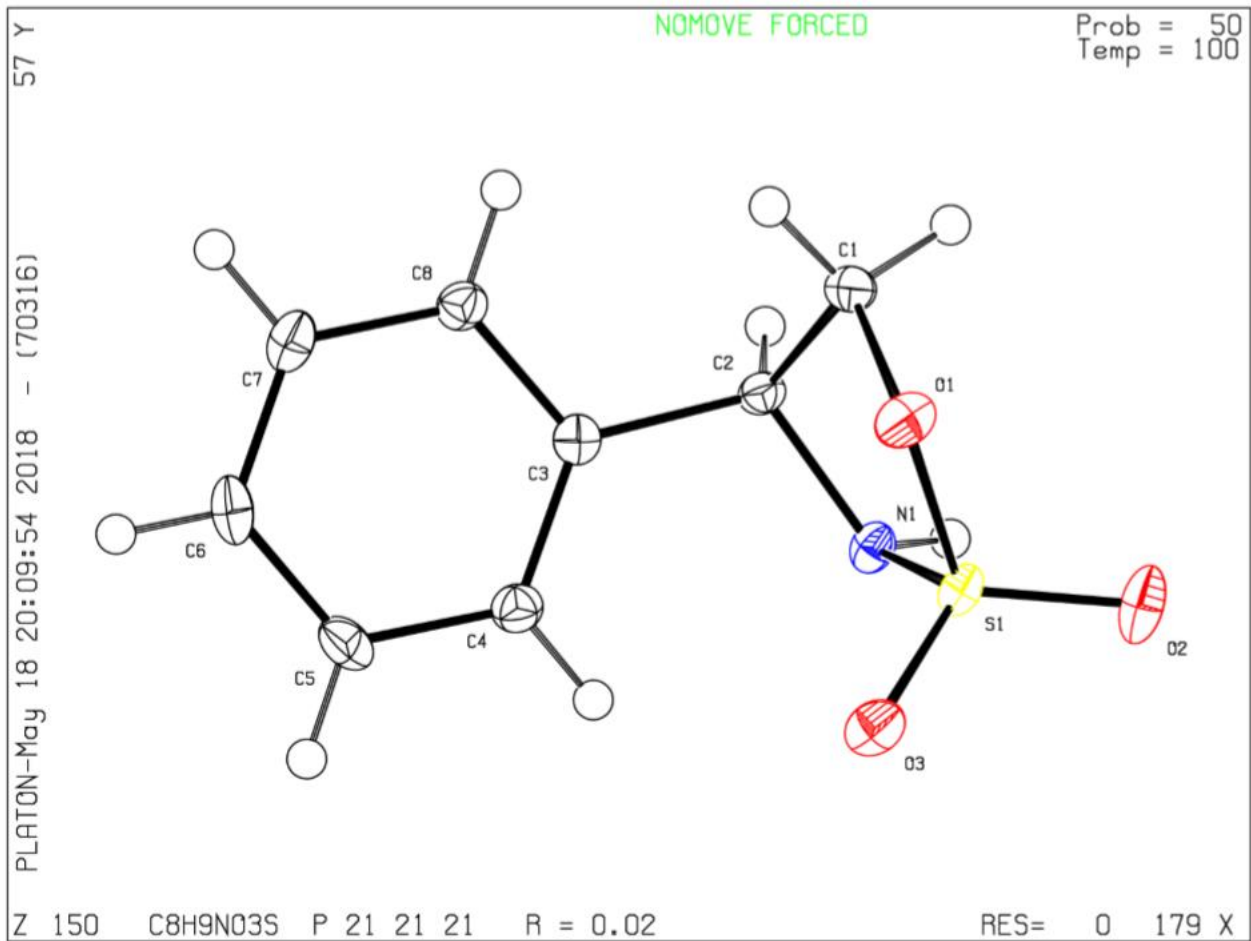

CHCl<sub>3</sub>

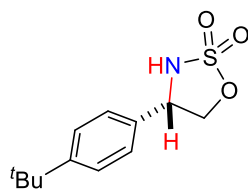

<sup>1</sup>H NMR of **2b**, 250 MHz, CDCl<sub>3</sub>

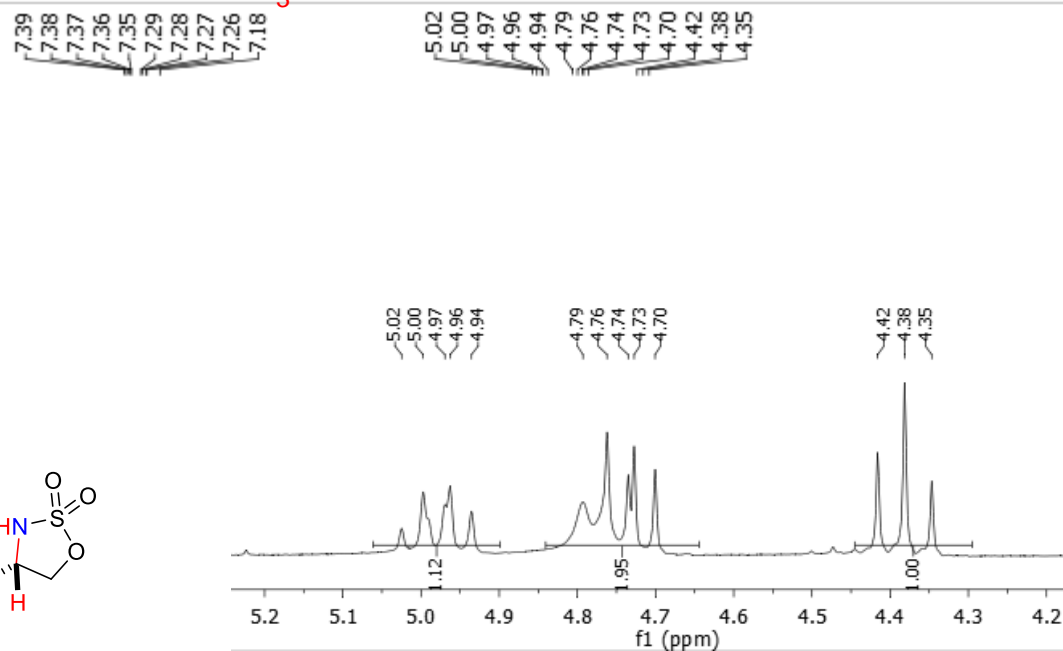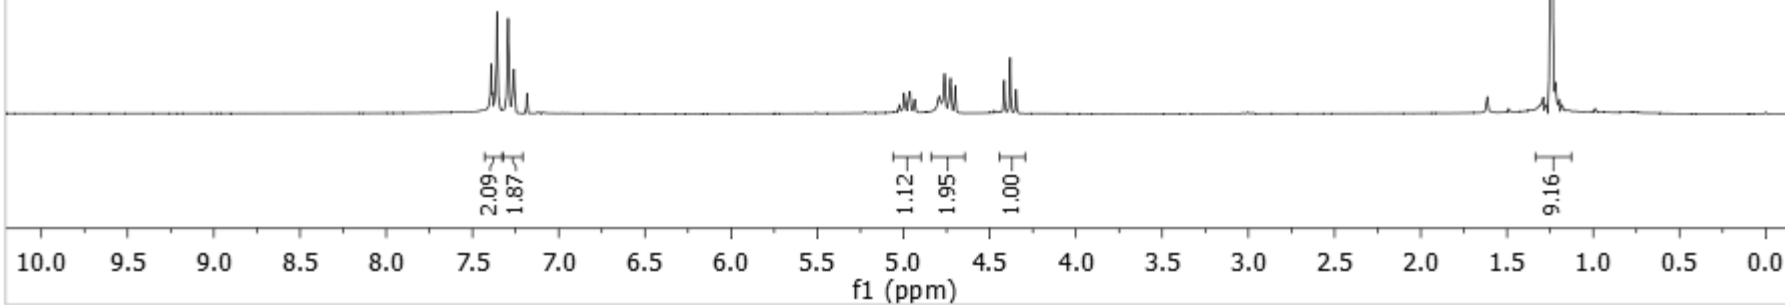

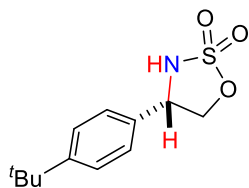

$^{13}\text{C}$  NMR of **2b**, 62.5 MHz,  $\text{CDCl}_3$

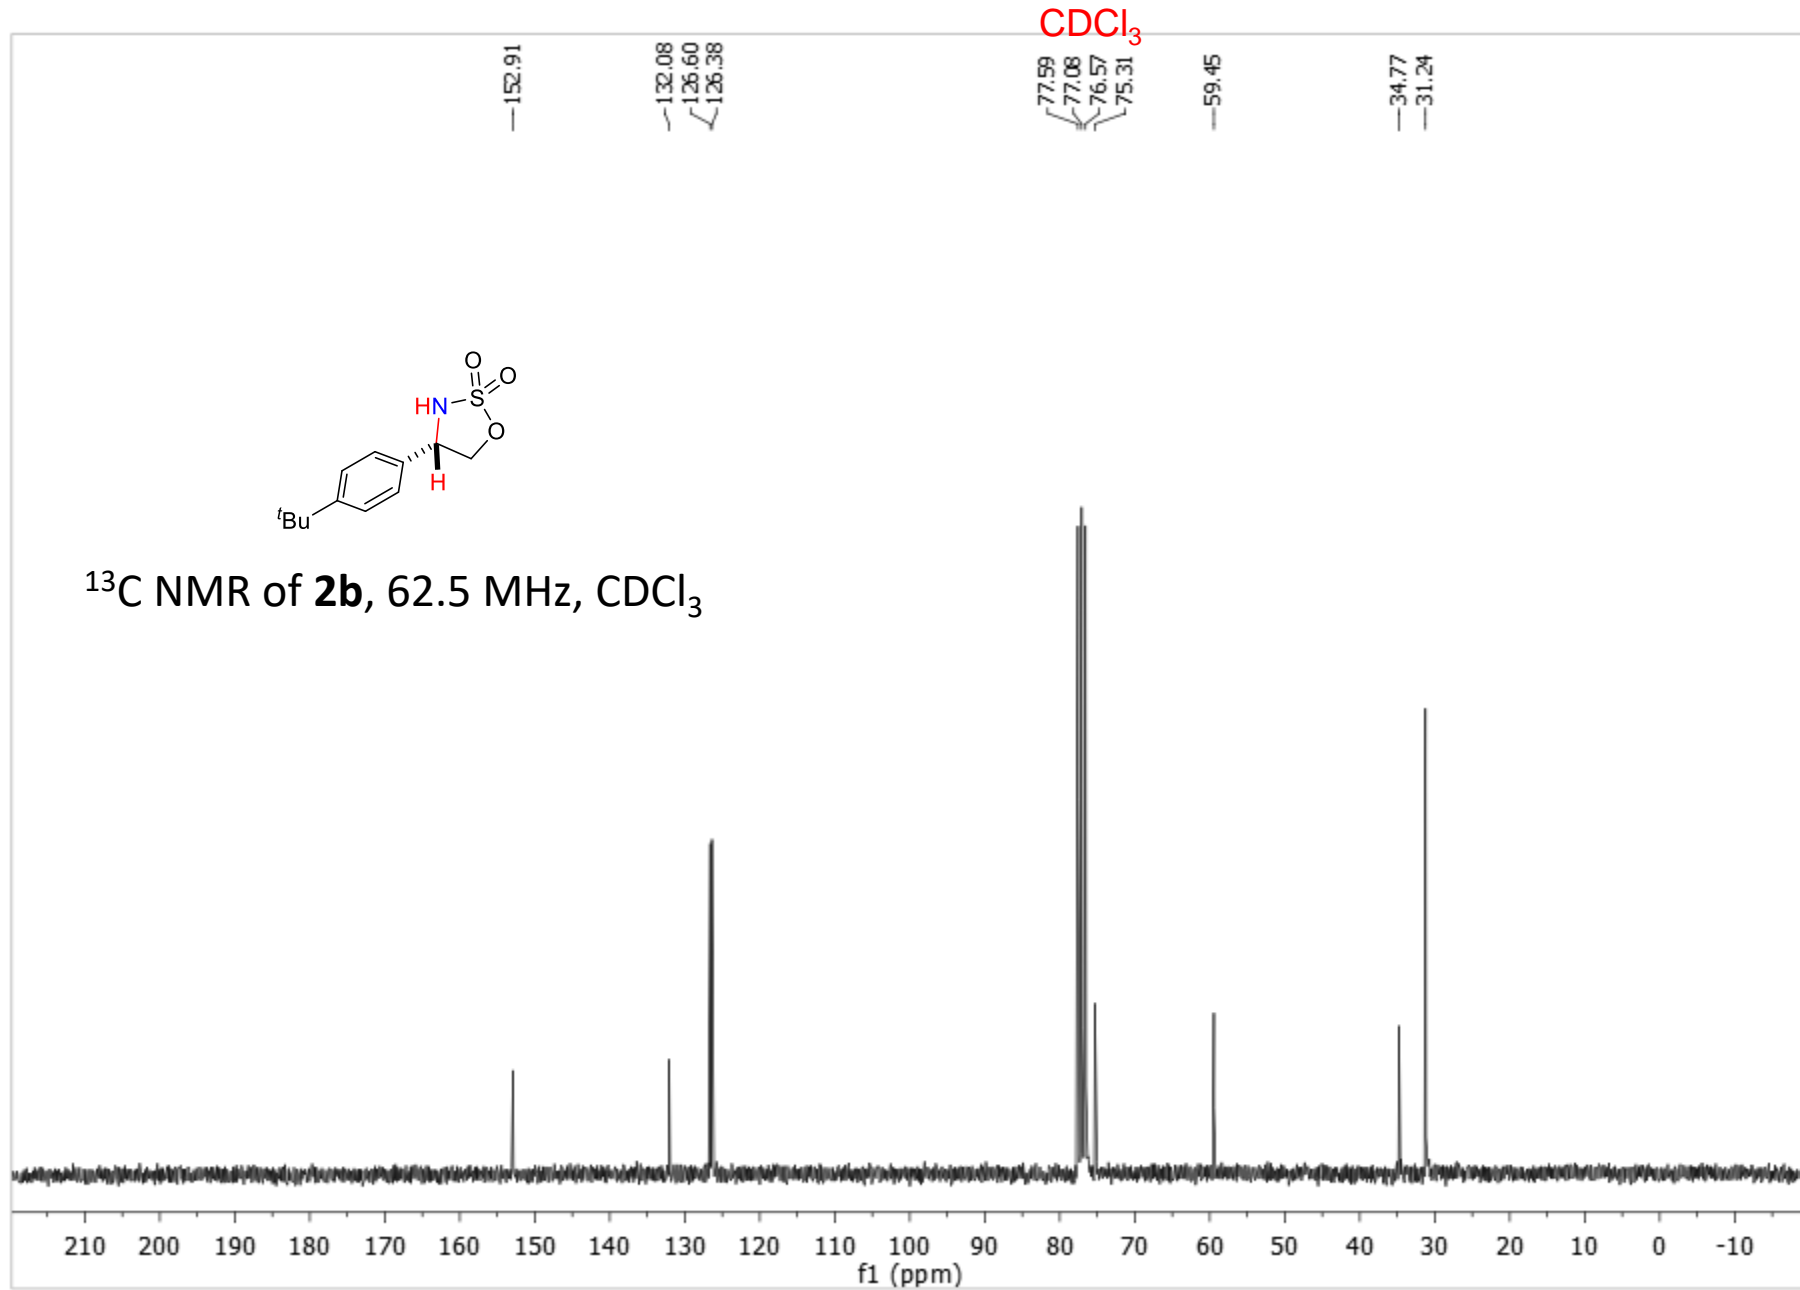

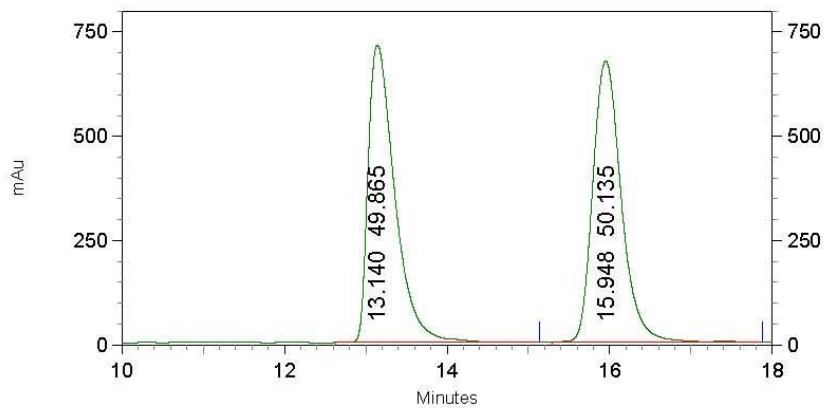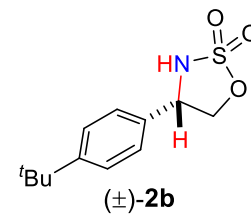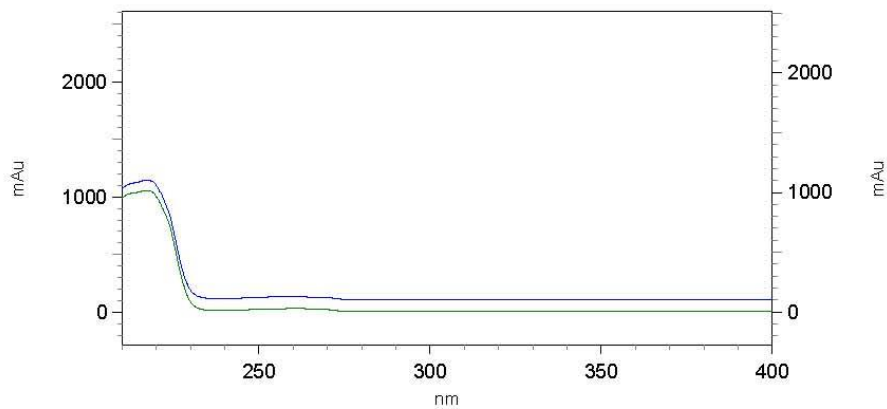

7: 224 nm, 4 nm

Results

| Pk #   | Name | Retention Time | Area Percent |
|--------|------|----------------|--------------|
| 1      |      | 13.140         | 49.865       |
| 2      |      | 15.948         | 50.135       |
| Totals |      |                | 100.000      |

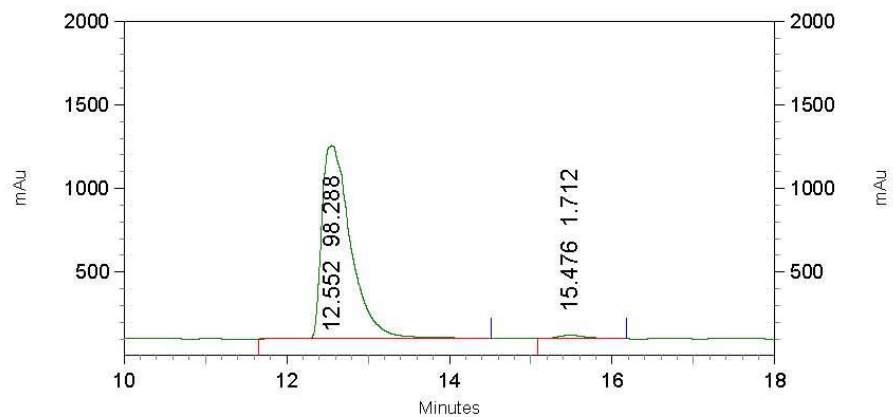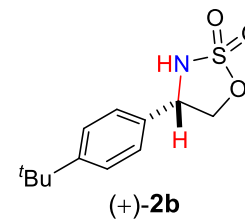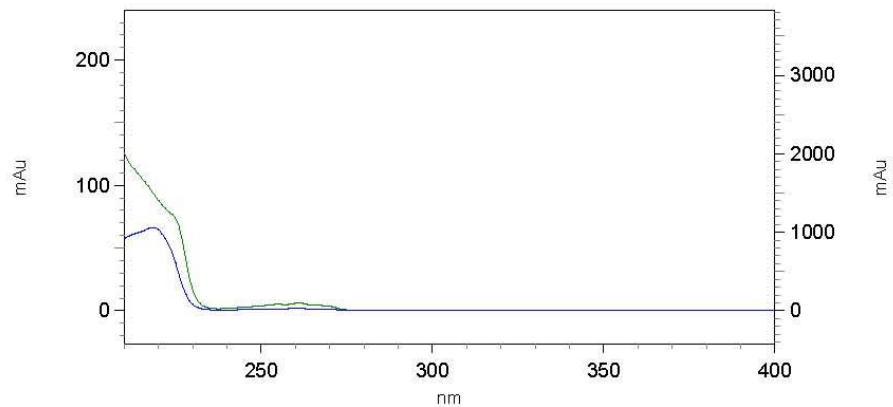

9: 207 nm, 4 nm

Results

| Name | Retention Time | Area Percent | Pk # |
|------|----------------|--------------|------|
|      | 12.552         | 98.288       | 1    |
|      | 15.476         | 1.712        | 2    |

|        |  |         |  |
|--------|--|---------|--|
| Totals |  | 100.000 |  |
|--------|--|---------|--|

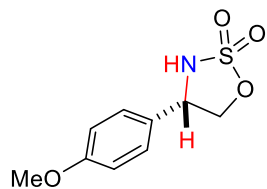

<sup>1</sup>H NMR of **2c**, 600 MHz, CDCl<sub>3</sub>

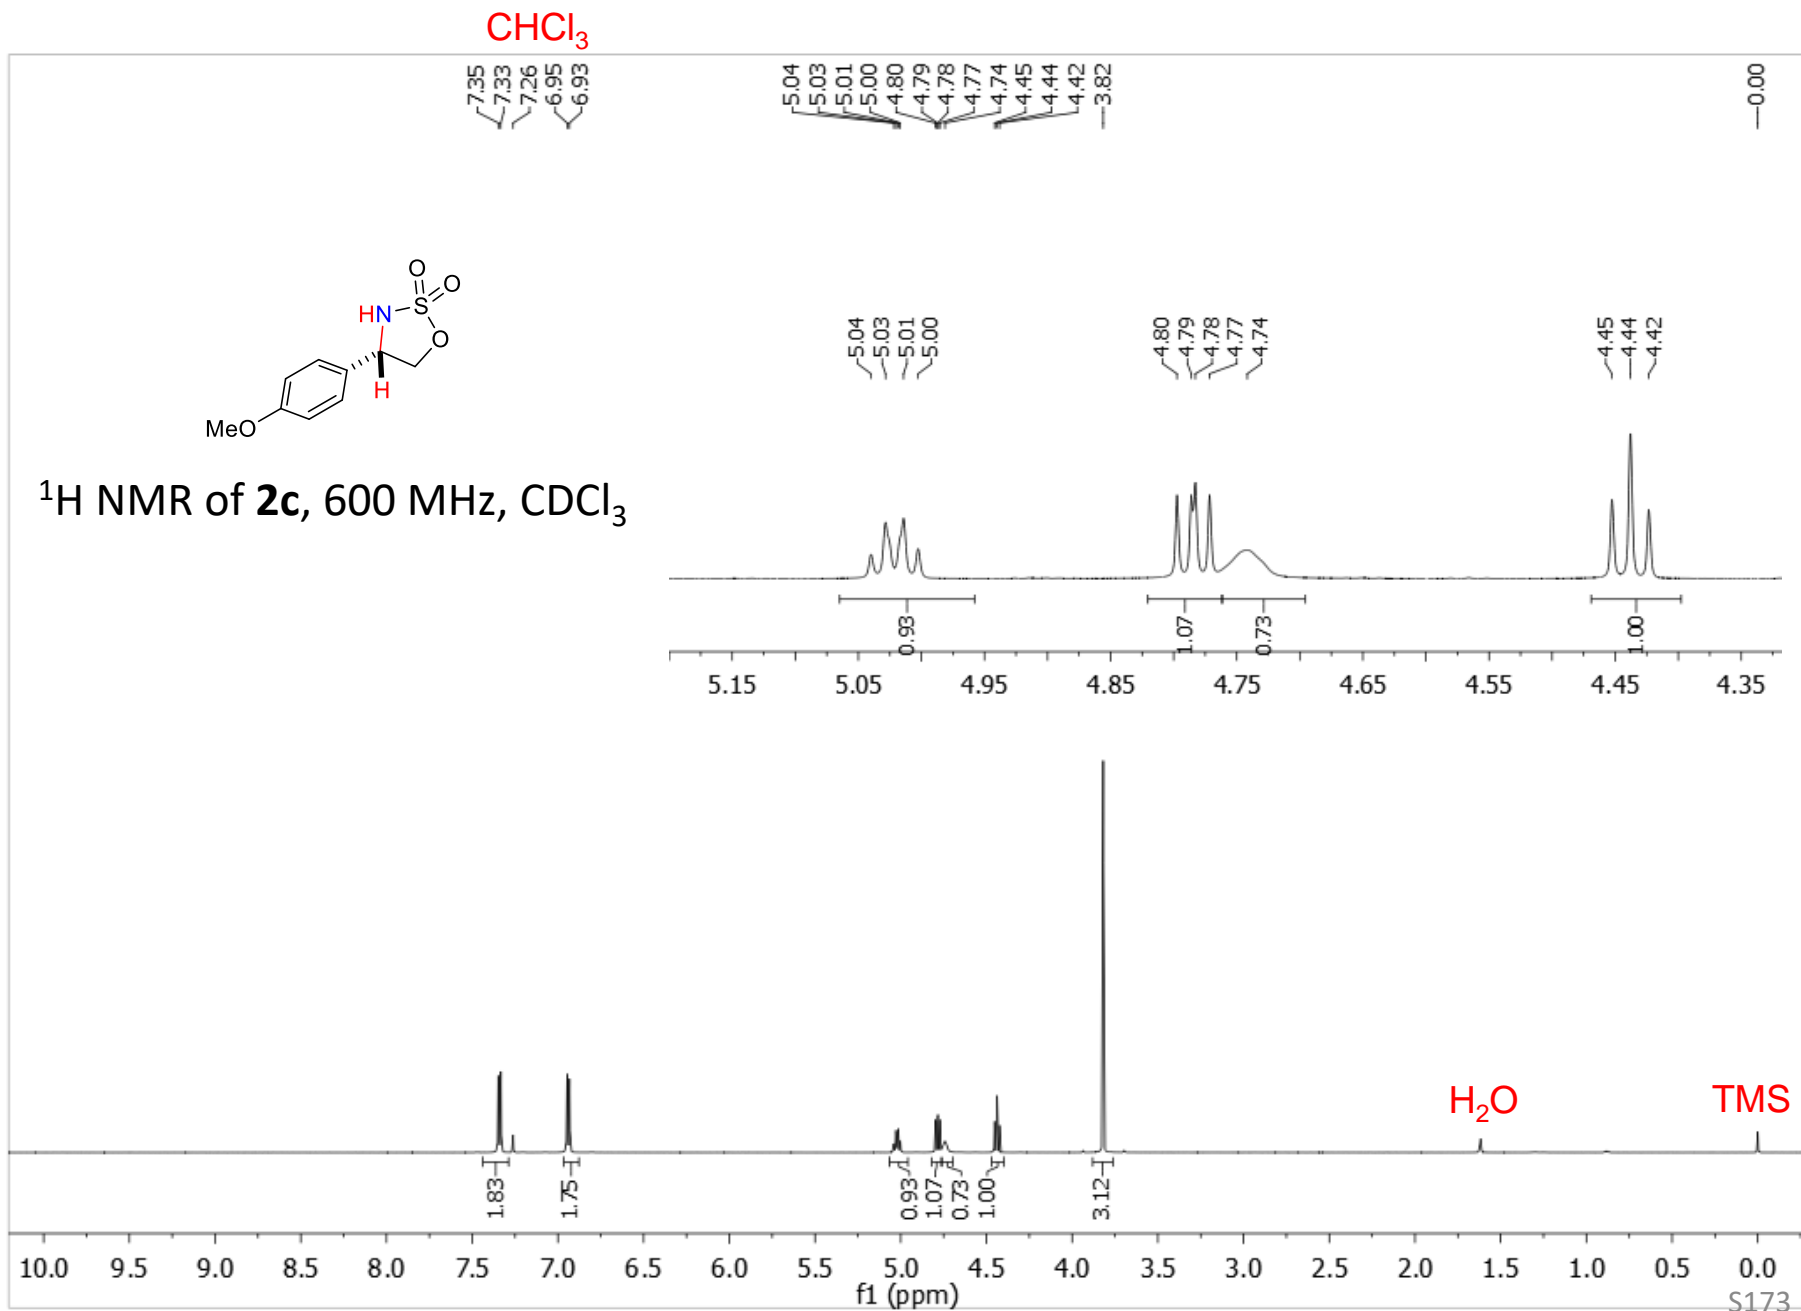

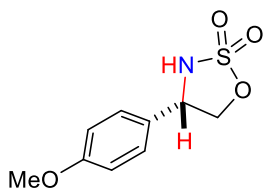

$^{13}\text{C}$  NMR of **2c**, 150 MHz,  $\text{CDCl}_3$

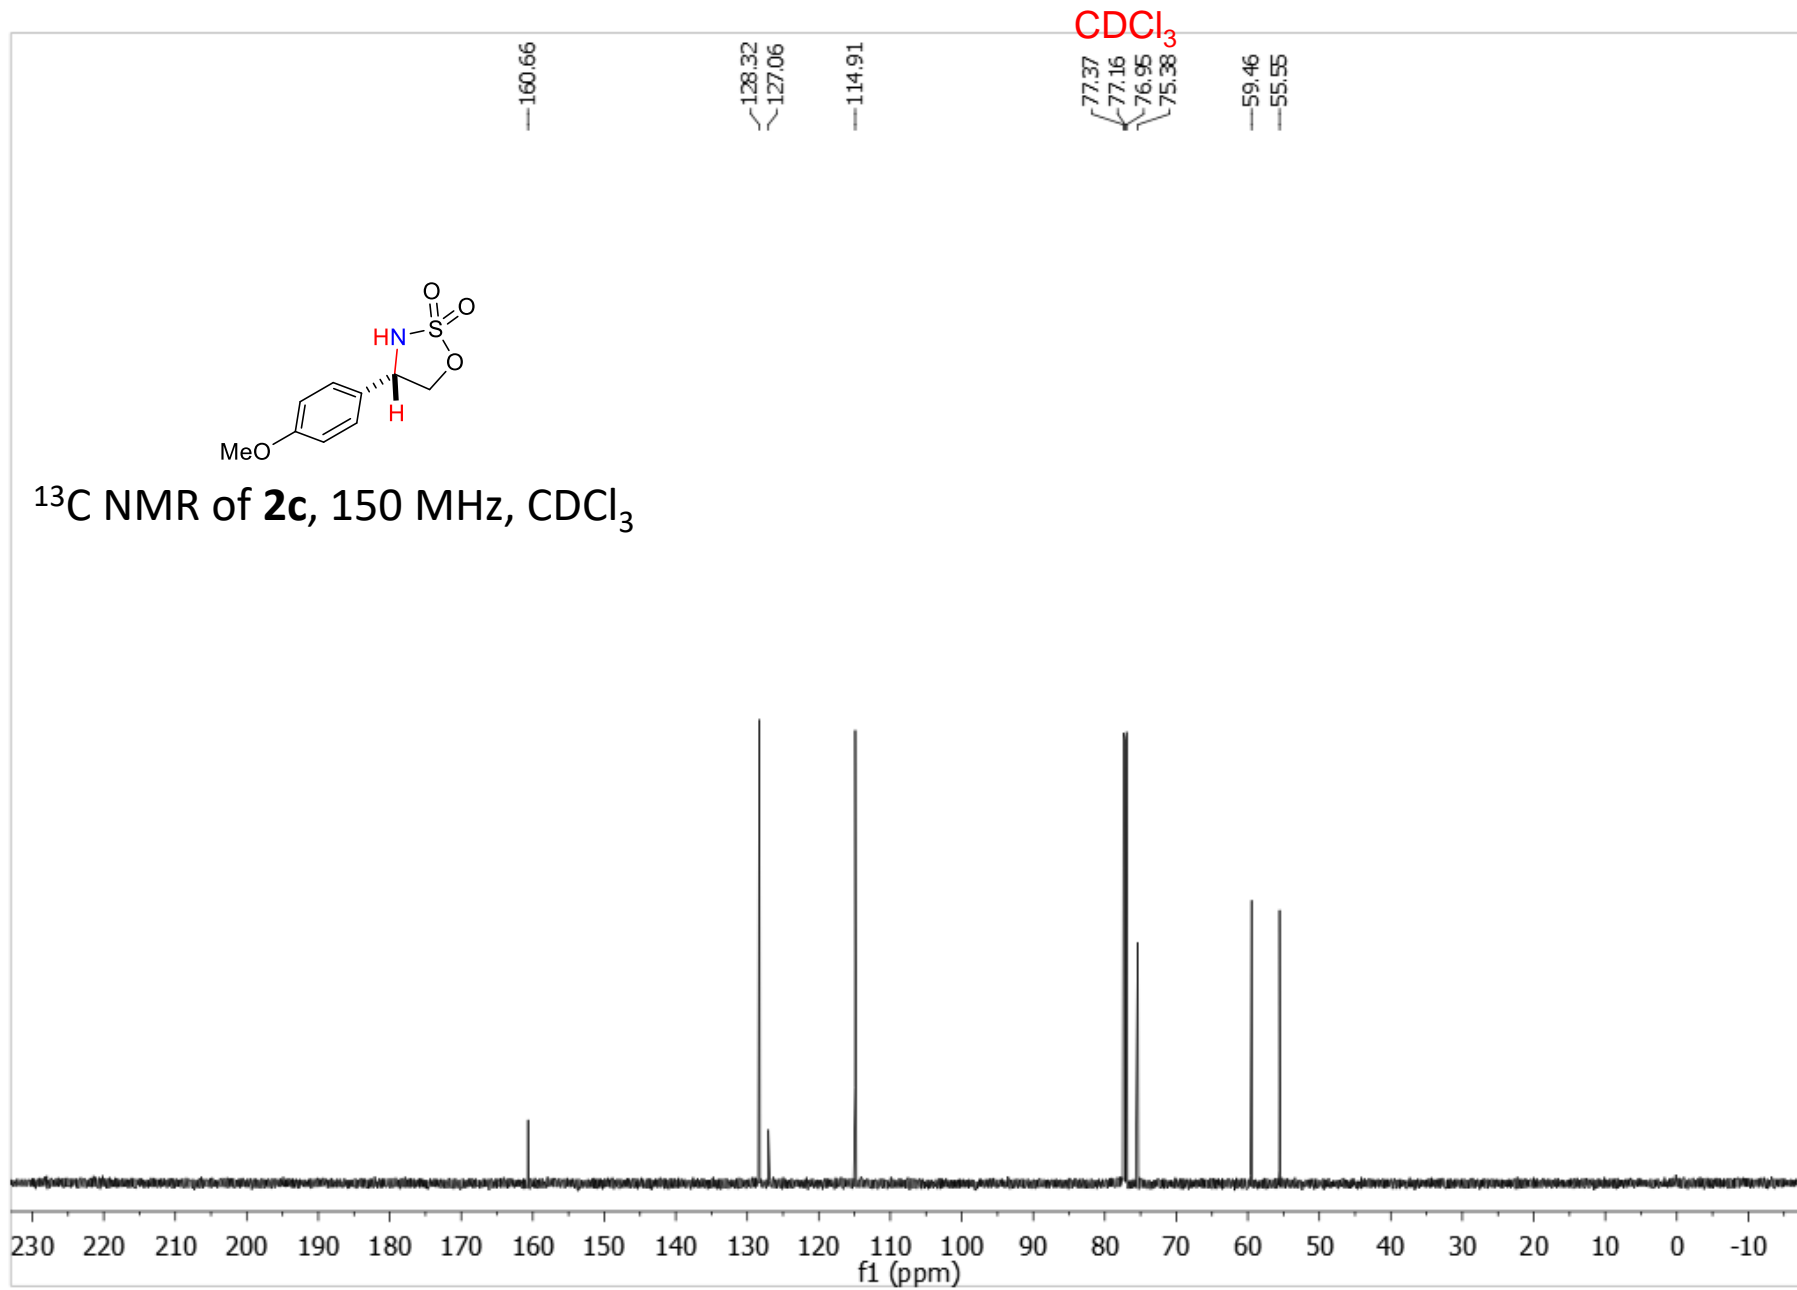

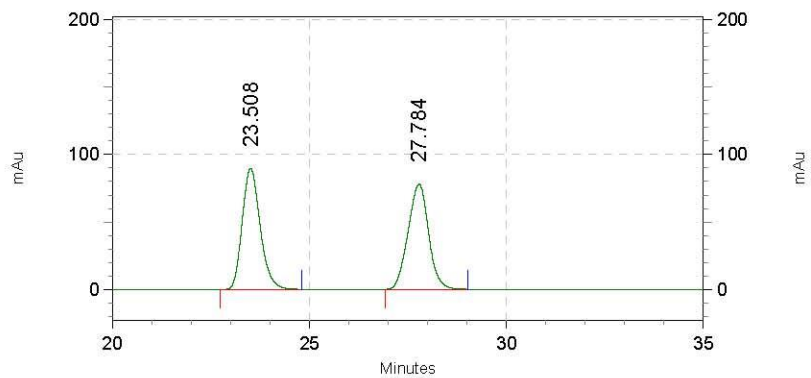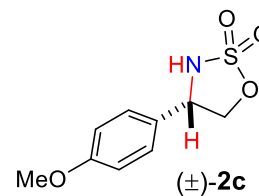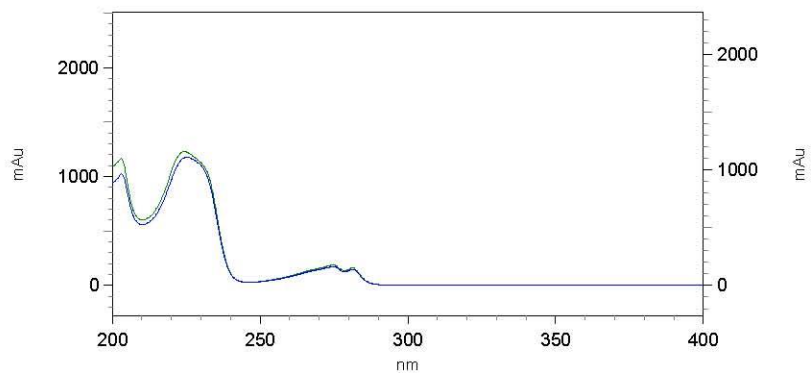

10: 274 nm, 4 nm  
Results

| Pk #   | Name | Retention Time | Area Percent |
|--------|------|----------------|--------------|
| 1      |      | 23.508         | 50.126       |
| 2      |      | 27.784         | 49.874       |
| Totals |      |                | 100.000      |



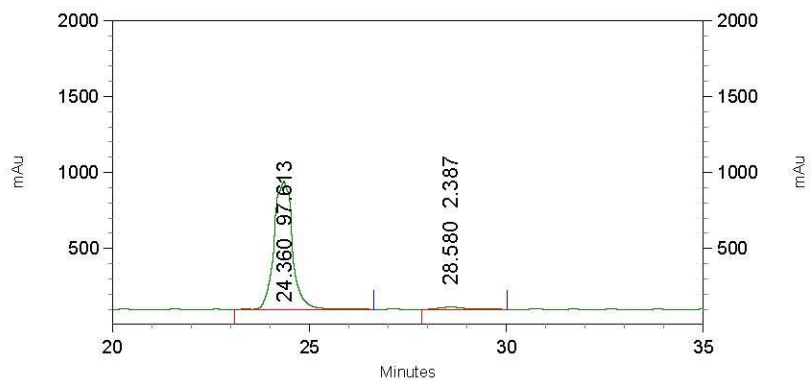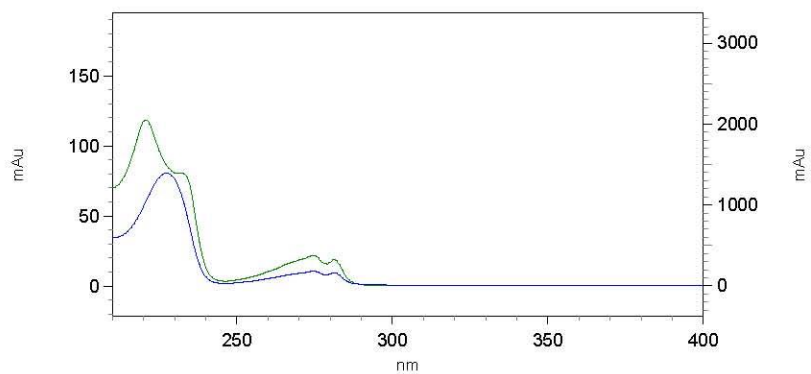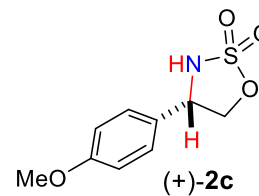

8: 204 nm, 4 nm  
Results

| Name | Retention Time | Area Percent | Pk # |
|------|----------------|--------------|------|
|      | 24.360         | 97.613       | 1    |
|      | 28.580         | 2.387        | 2    |

|        |  |         |  |
|--------|--|---------|--|
| Totals |  | 100.000 |  |
|--------|--|---------|--|

## checkCIF/PLATON report

Structure factors have been supplied for datablock(s) yh\_iv\_56

THIS REPORT IS FOR GUIDANCE ONLY. IF USED AS PART OF A REVIEW PROCEDURE FOR PUBLICATION, IT SHOULD NOT REPLACE THE EXPERTISE OF AN EXPERIENCED CRYSTALLOGRAPHIC REFEREE.

No syntax errors found. CIF dictionary Interpreting this report

### Datablock: yh\_iv\_56

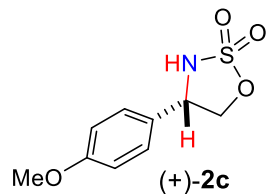

Bond precision: C-C = 0.0040 A Wavelength=1.54178  
Cell: a=5.32350 (9) b=8.2534 (1) c=22.6205 (3)  
alpha=90 beta=90 gamma=90  
Temperature: 228 K

|                        | Calculated    | Reported      |
|------------------------|---------------|---------------|
| Volume                 | 993.88 (2)    | 993.88 (2)    |
| Space group            | P 21 21 21    | P 21 21 21    |
| Hall group             | P 2ac 2ab     | P 2ac 2ab     |
| Moiety formula         | C9 H11 N O4 S | C9 H11 N O4 S |
| Sum formula            | C9 H11 N O4 S | C9 H11 N O4 S |
| Mr                     | 229.25        | 229.25        |
| Dx, g cm <sup>-3</sup> | 1.532         | 1.532         |
| Z                      | 4             | 4             |
| Mu (mm <sup>-1</sup> ) | 2.888         | 2.888         |
| F000                   | 480.0         | 480.0         |
| F000'                  | 482.84        |               |
| h, k, lmax             | 6, 10, 27     | 6, 10, 27     |
| Nref                   | 1912 [ 1152]  | 1817          |
| Tmin, Tmax             | 0.525, 0.561  | 0.621, 1.000  |
| Tmin'                  | 0.300         |               |

Correction method= # Reported T Limits: Tmin=0.621 Tmax=1.000  
AbsCorr = MULTI-SCAN

Data completeness= 1.58/0.95 Theta(max)= 70.942

R(reflections)= 0.0322 ( 1772) wr2(reflections)= 0.0816 ( 1817)

S = 1.076 Npar= 141

The following ALERTS were generated. Each ALERT has the format  
test-name\_ALERT\_alert-type\_alert-level.  
Click on the hyperlinks for more details of the test.

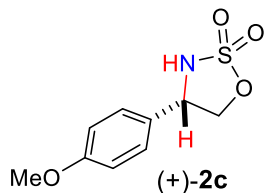


---

| ● Alert level C   |                                                 |              |
|-------------------|-------------------------------------------------|--------------|
| PLAT029_ALERT_3_C | diffn_measured_fraction_theta_full value Low .  | 0.966 Why?   |
| PLAT241_ALERT_2_C | High 'MainMol' Ueq as Compared to Neighbors of  | 011 Check    |
| PLAT242_ALERT_2_C | Low 'MainMol' Ueq as Compared to Neighbors of   | S12 Check    |
| PLAT911_ALERT_3_C | Missing FCF Refl Between Thmin & STh/L= 0.600   | 37 Report    |
| PLAT987_ALERT_1_C | The Flack x is >> 0 - Do a BASF/TWIN Refinement | Please Check |

---

| ● Alert level G   |                                                  |              |
|-------------------|--------------------------------------------------|--------------|
| PLAT033_ALERT_4_G | Flack x Value Deviates > 3.0 * sigma from Zero . | 0.043 Note   |
| PLAT395_ALERT_2_G | Deviating X-O-Y Angle From 120 for O11           | 112.5 Degree |
| PLAT791_ALERT_4_G | Model has Chirality at C9 (Chiral SPGR)          | S Verify     |
| PLAT912_ALERT_4_G | Missing # of FCF Reflections Above STh/L= 0.600  | 14 Note      |
| PLAT978_ALERT_2_G | Number C-C Bonds with Positive Residual Density. | 7 Info       |

---

0 **ALERT level A** = Most likely a serious problem - resolve or explain  
 0 **ALERT level B** = A potentially serious problem, consider carefully  
 5 **ALERT level C** = Check. Ensure it is not caused by an omission or oversight  
 5 **ALERT level G** = General information/check it is not something unexpected

1 ALERT type 1 CIF construction/syntax error, inconsistent or missing data  
 4 ALERT type 2 Indicator that the structure model may be wrong or deficient  
 2 ALERT type 3 Indicator that the structure quality may be low  
 3 ALERT type 4 Improvement, methodology, query or suggestion  
 0 ALERT type 5 Informative message, check

---

It is advisable to attempt to resolve as many as possible of the alerts in all categories. Often the minor alerts point to easily fixed oversights, errors and omissions in your CIF or refinement strategy, so attention to these fine details can be worthwhile. In order to resolve some of the more serious problems it may be necessary to carry out additional measurements or structure refinements. However, the purpose of your study may justify the reported deviations and the more serious of these should normally be commented upon in the discussion or experimental section of a paper or in the "special\_details" fields of the CIF. checkCIF was carefully designed to identify outliers and unusual parameters, but every test has its limitations and alerts that are not important in a particular case may appear. Conversely, the absence of alerts does not guarantee there are no aspects of the results needing attention. It is up to the individual to critically assess their own results and, if necessary, seek expert advice.

#### Publication of your CIF in IUCr journals

A basic structural check has been run on your CIF. These basic checks will be run on all CIFs submitted for publication in IUCr journals (*Acta Crystallographica*, *Journal of Applied Crystallography*, *Journal of Synchrotron Radiation*); however, if you intend to submit to *Acta Crystallographica Section C* or *E* or *IUCrData*, you should make sure that full publication checks are run on the final version of your CIF prior to submission.

#### Publication of your CIF in other journals

Please refer to the *Notes for Authors* of the relevant journal for any special instructions relating to CIF submission.

PLATON version of 30/01/2018; check.def file version of 30/01/2018

Daublecky\_iv\_56 - ellipsoid plot

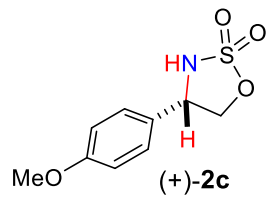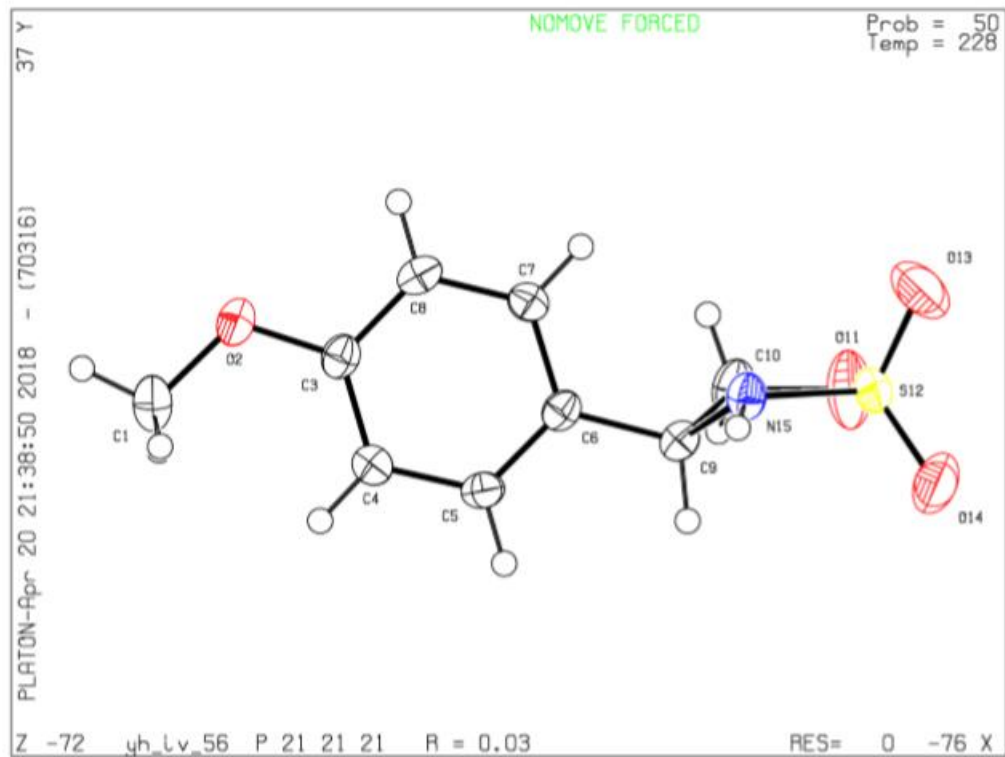

CHCl<sub>3</sub>

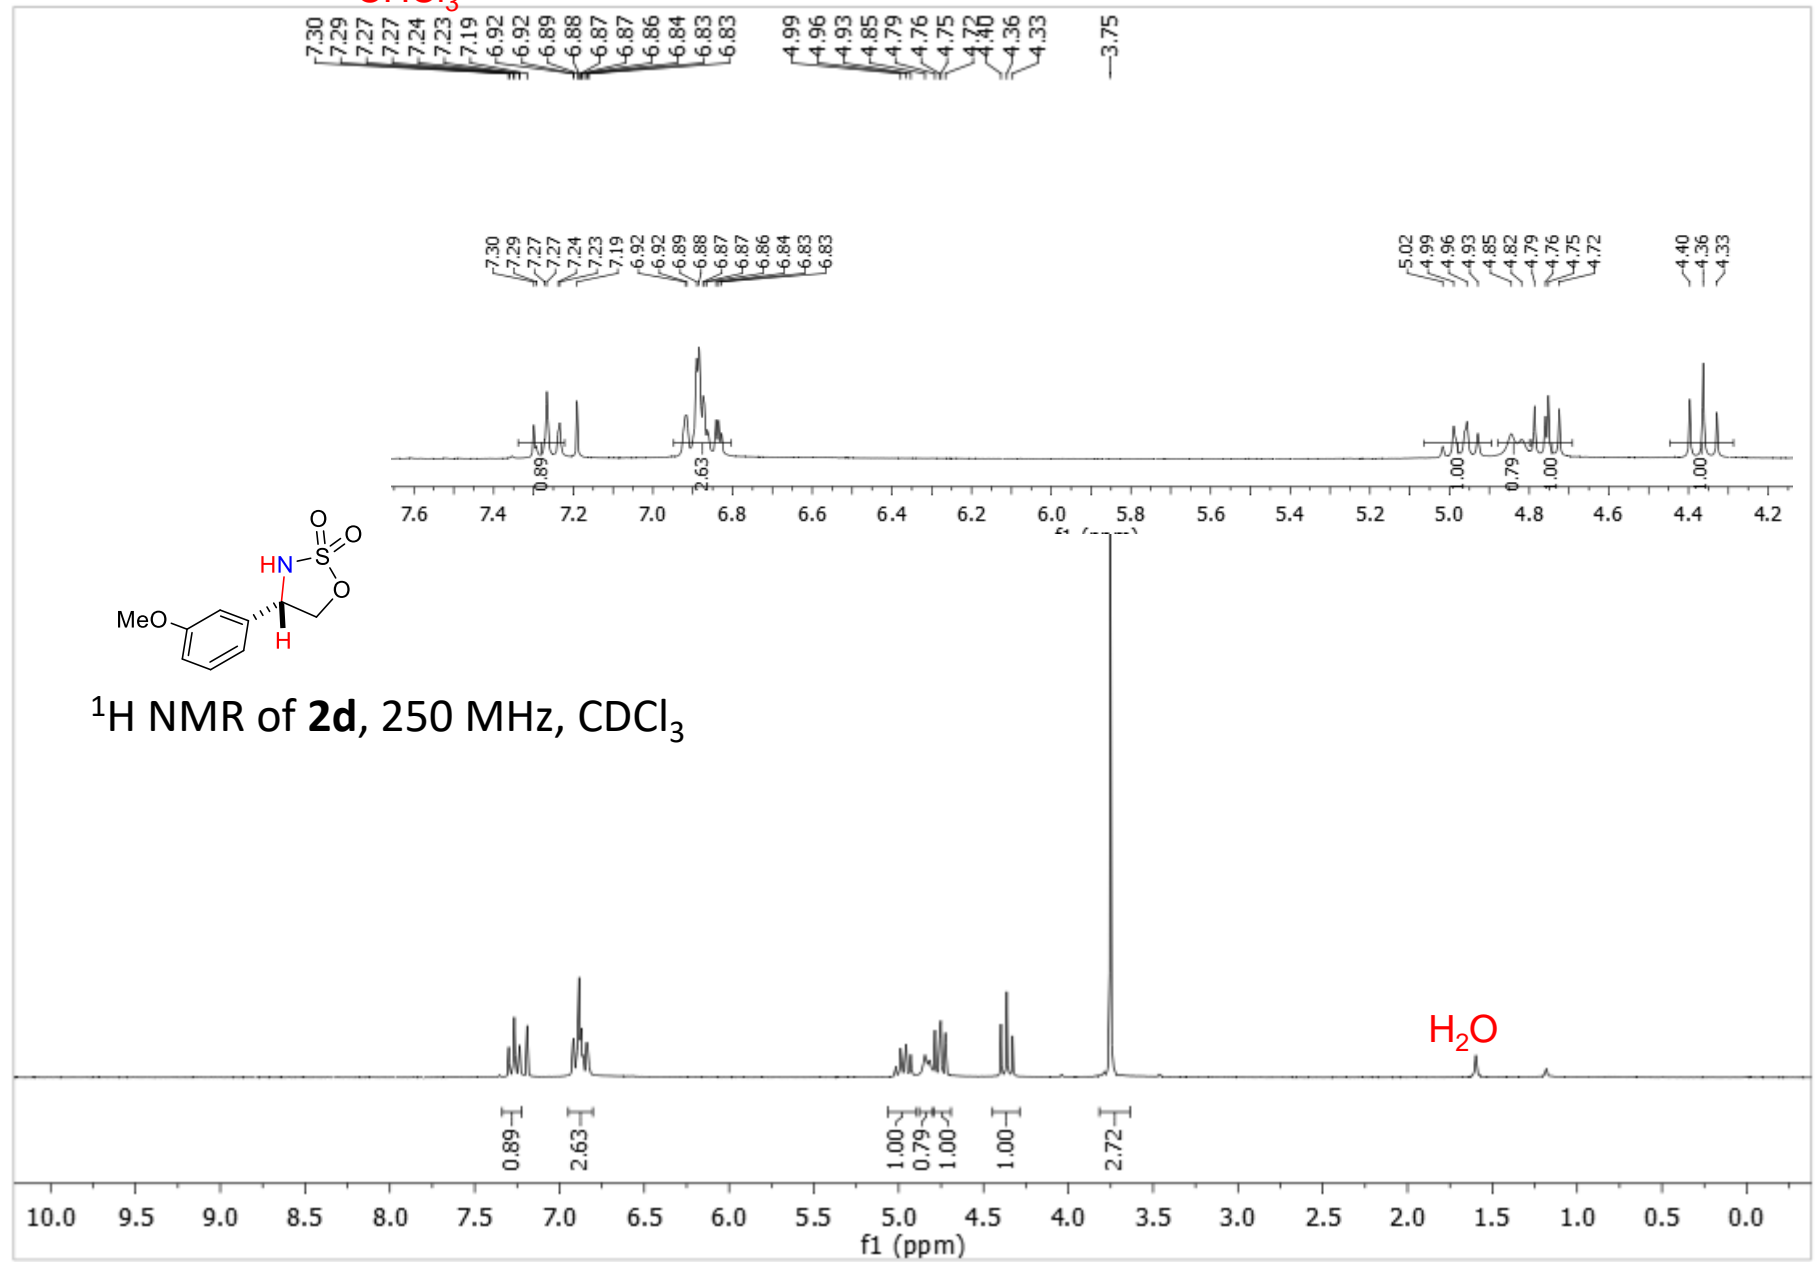

H<sub>2</sub>O

CDCl<sub>3</sub>

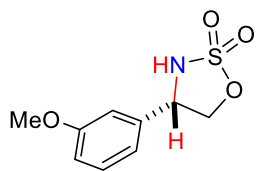

<sup>13</sup>C NMR of **2d**, 62.5 MHz, CDCl<sub>3</sub>

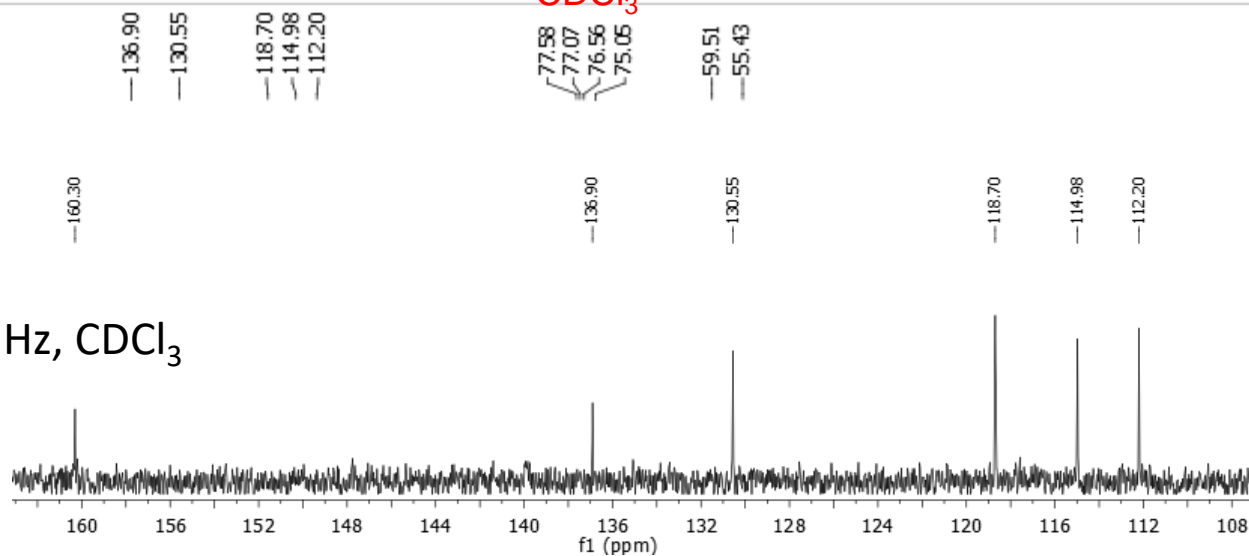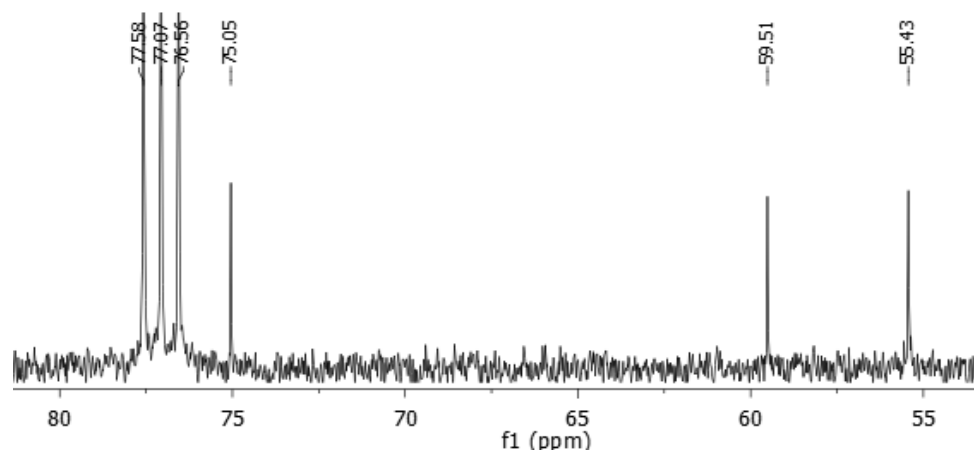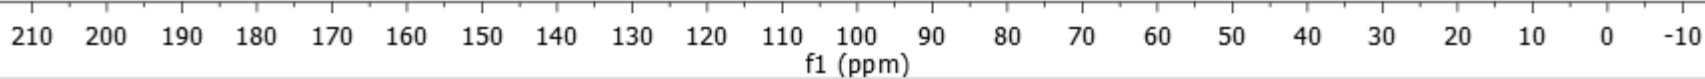

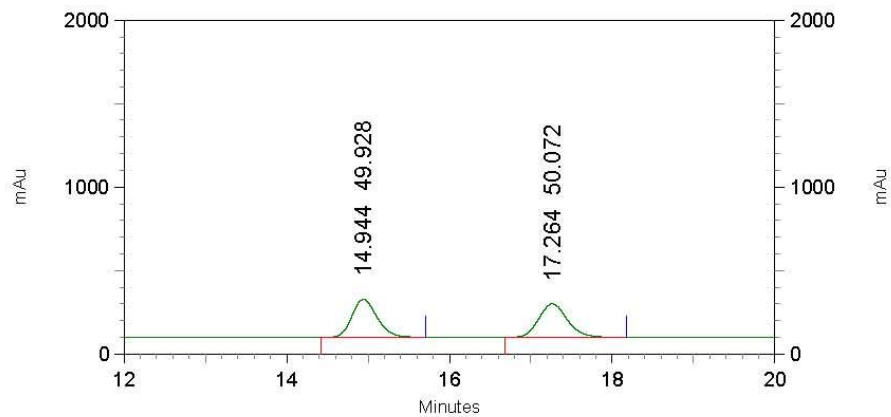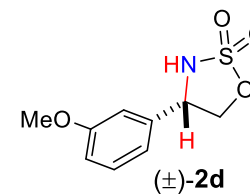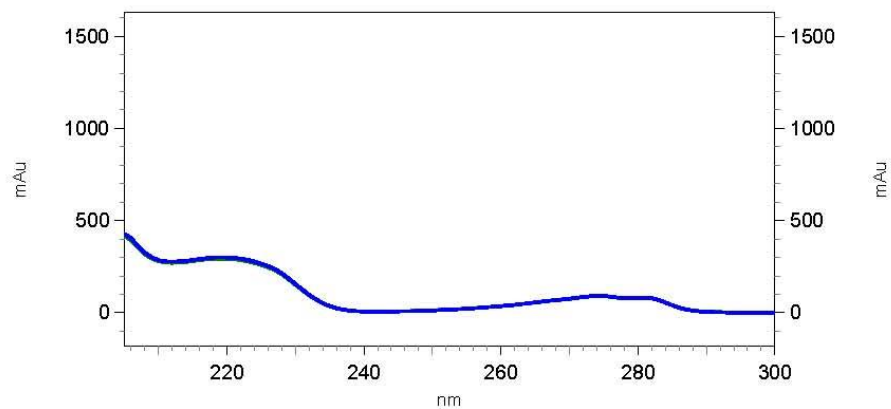

18: 232 nm, 4 nm

Results

| Pk #   | Name | Retention Time | Area Percent |
|--------|------|----------------|--------------|
| 1      |      | 14.944         | 49.928       |
| 2      |      | 17.264         | 50.072       |
| Totals |      |                | 100.000      |

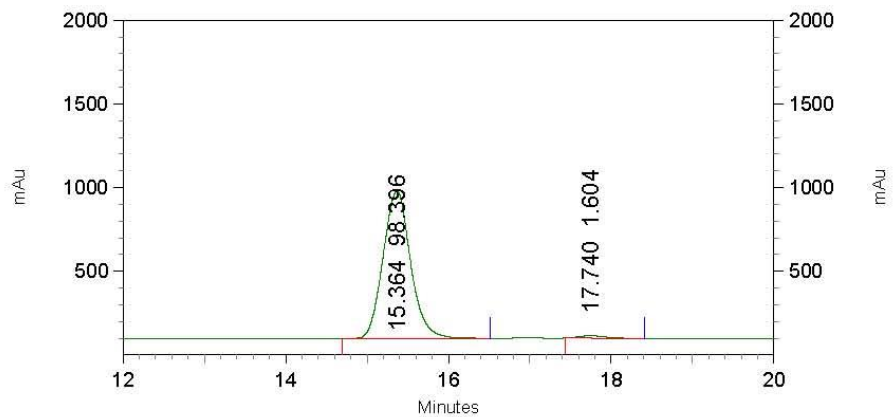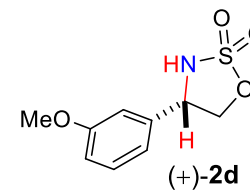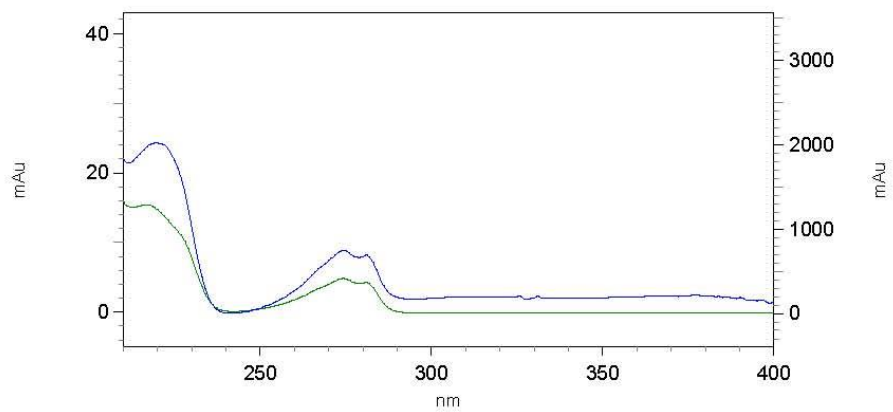

1: 232 nm, 4 nm

Results

| Name | Retention Time | Area Percent | Pk # |
|------|----------------|--------------|------|
|      | 15.364         | 98.396       | 1    |
|      | 17.740         | 1.604        | 2    |

|        |  |         |  |
|--------|--|---------|--|
| Totals |  | 100.000 |  |
|--------|--|---------|--|



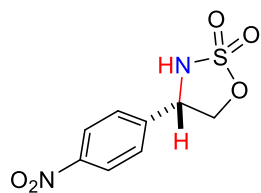

$^1\text{H}$  NMR of **2e**, 400 MHz, Acetone- $D_6$

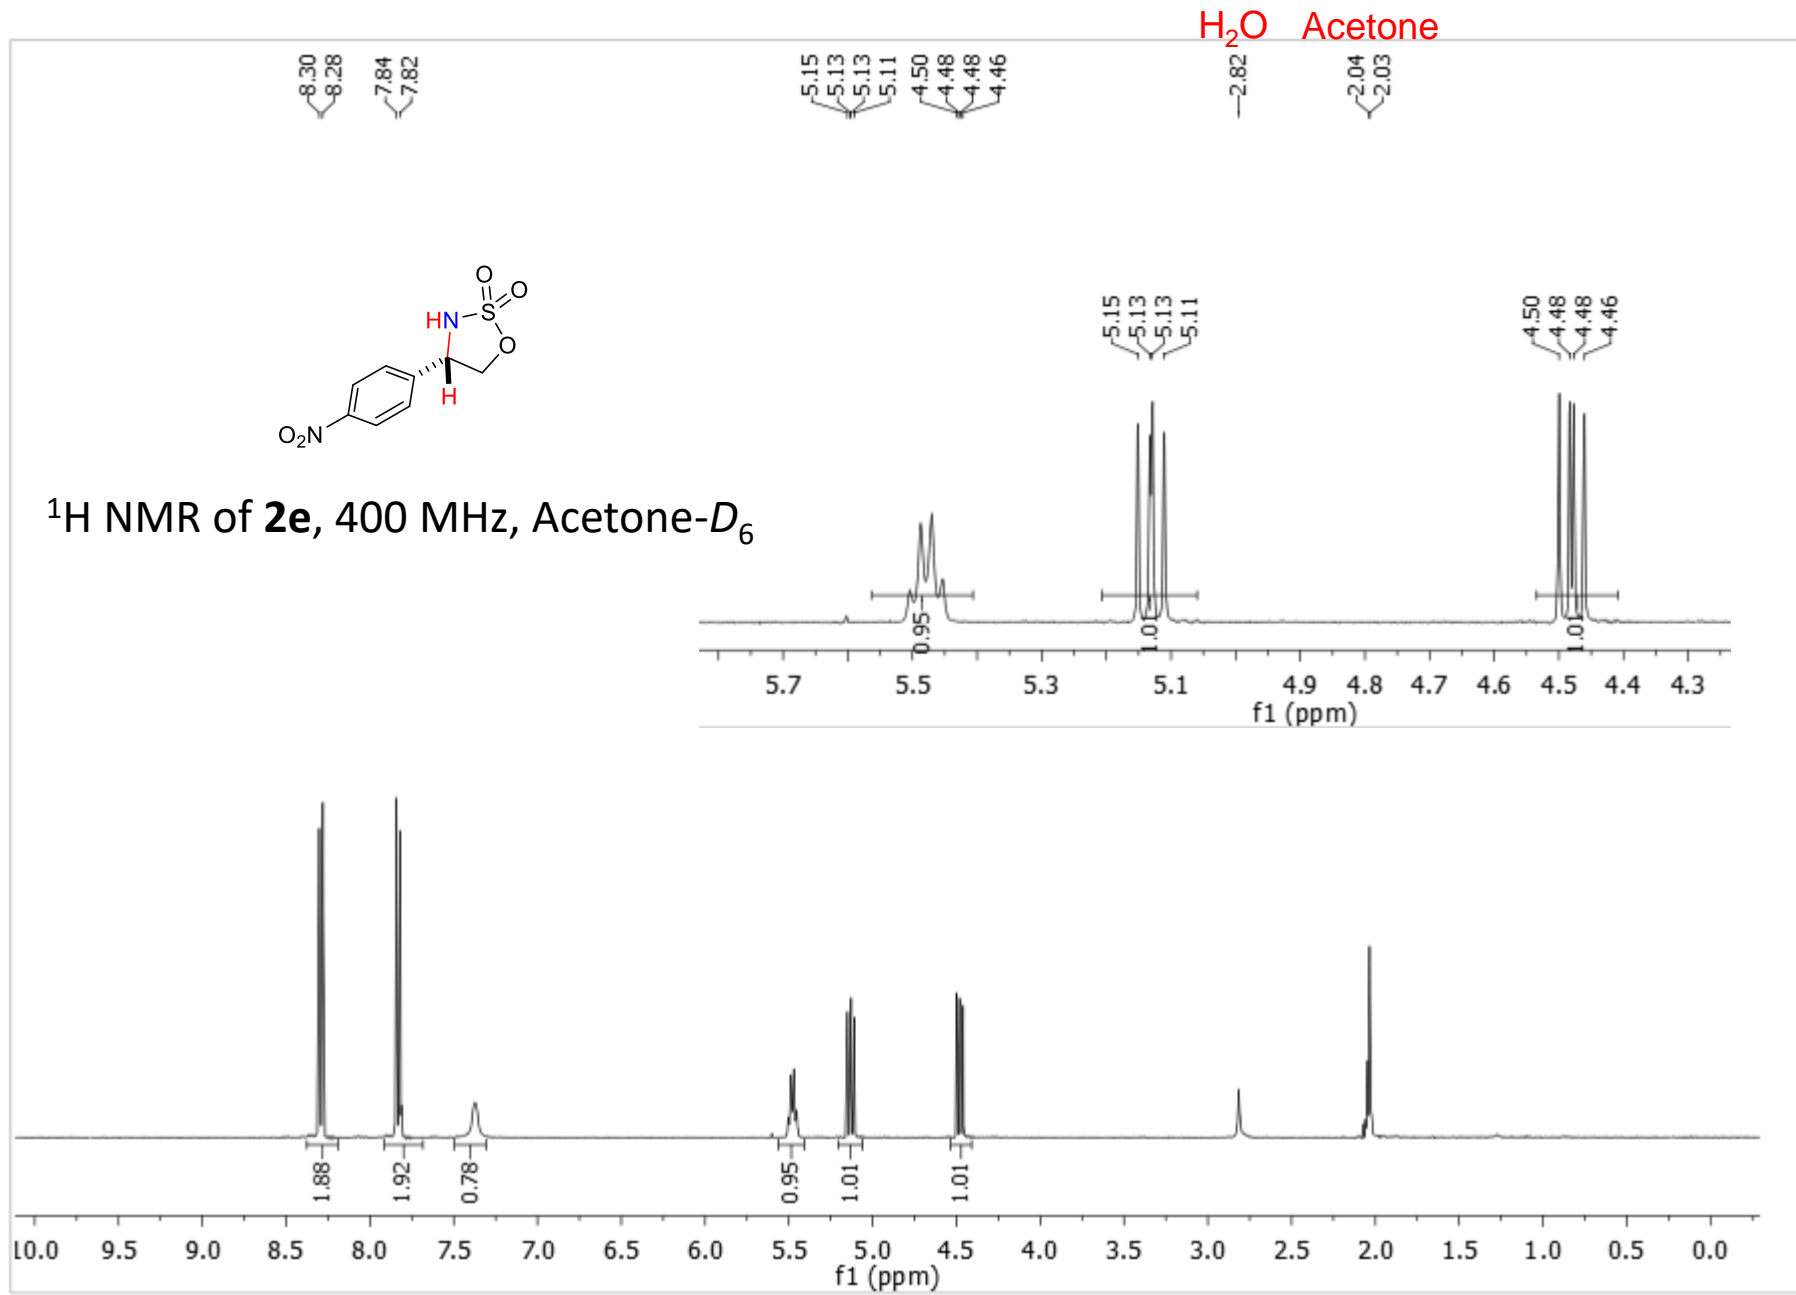

Acetone- $D_6$

Acetone- $D_6$

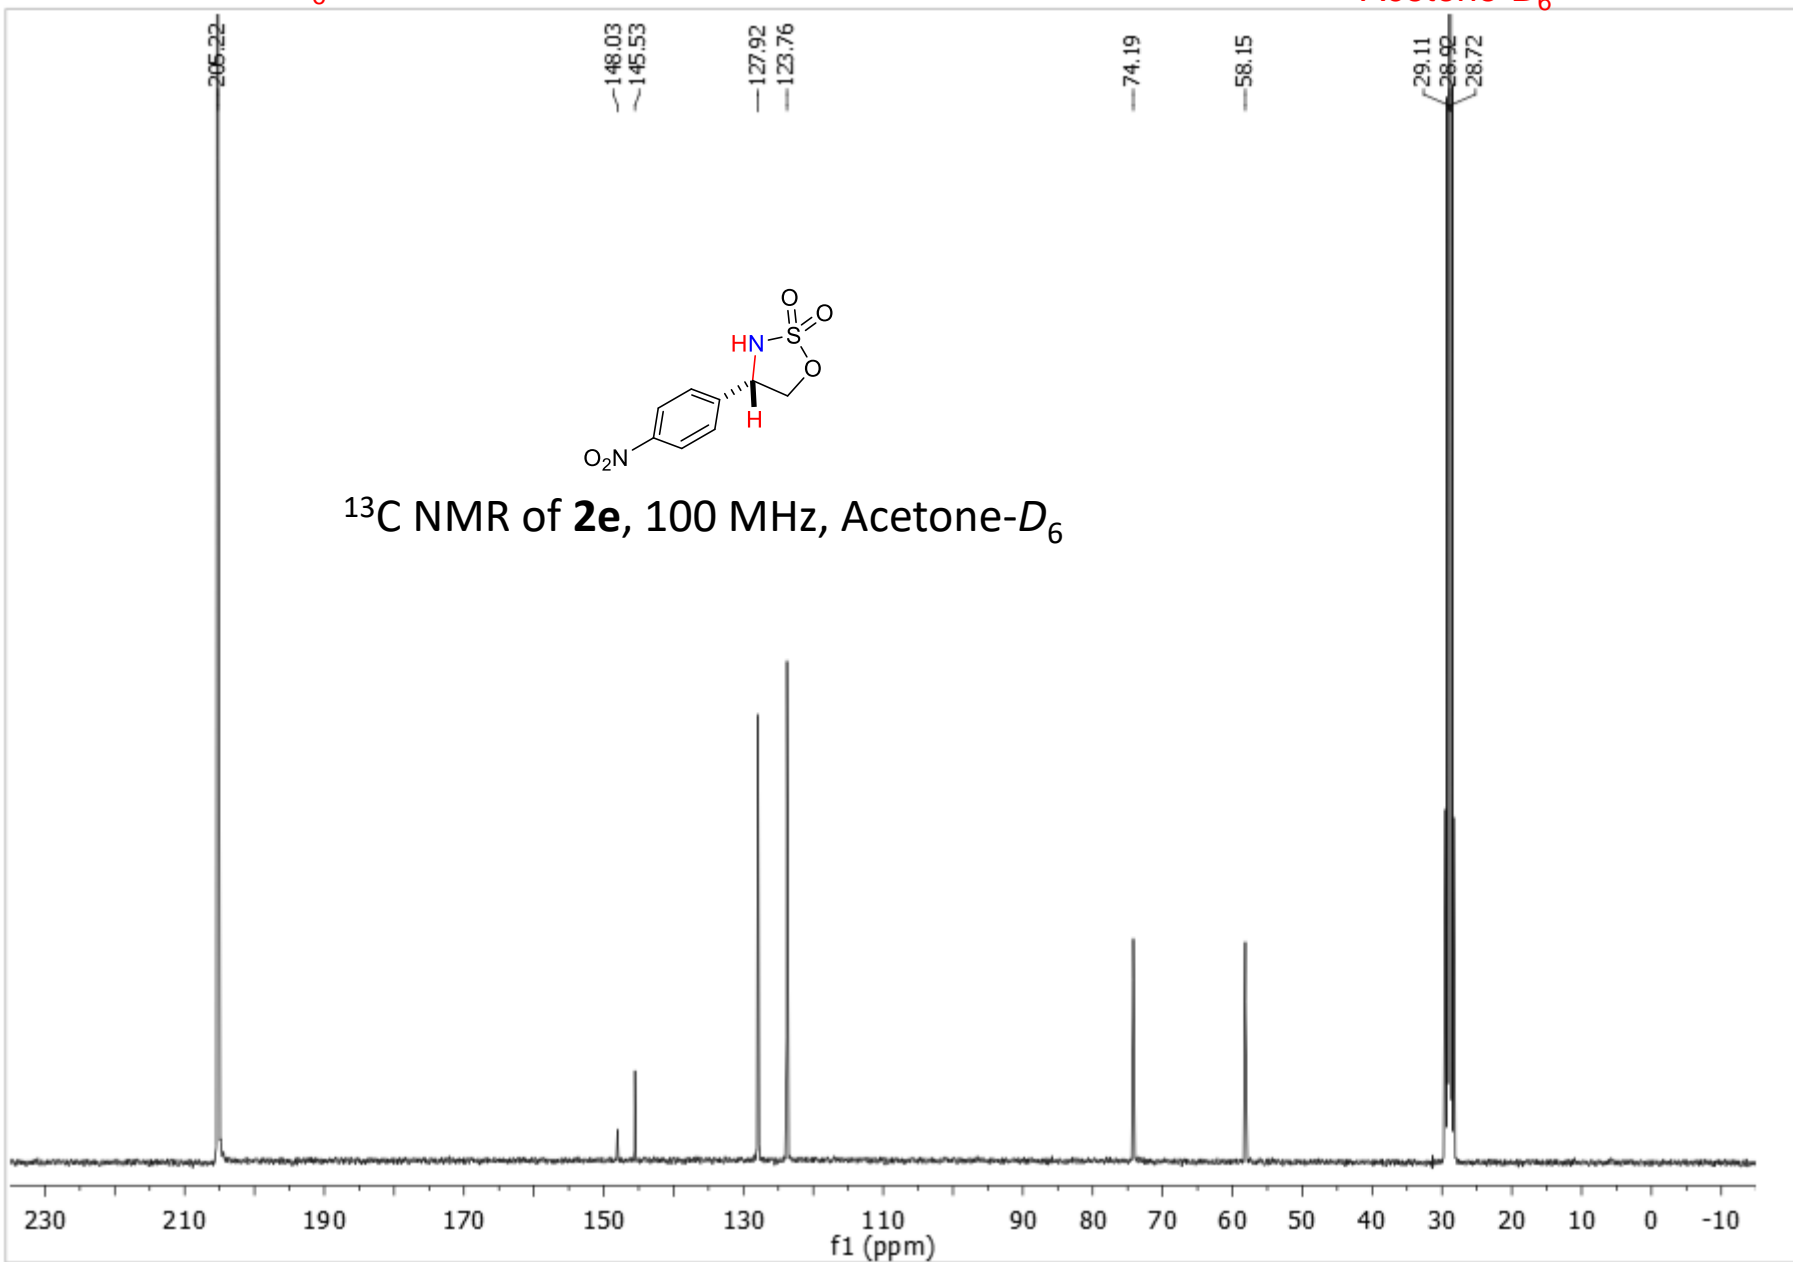

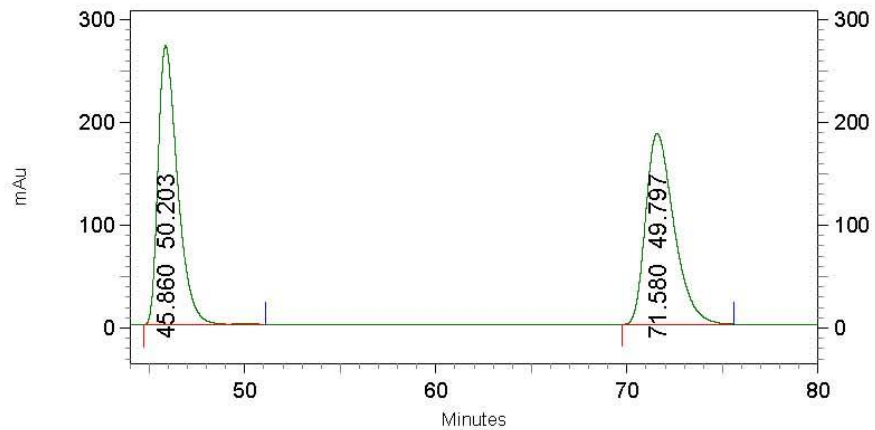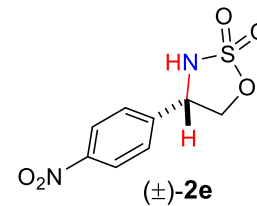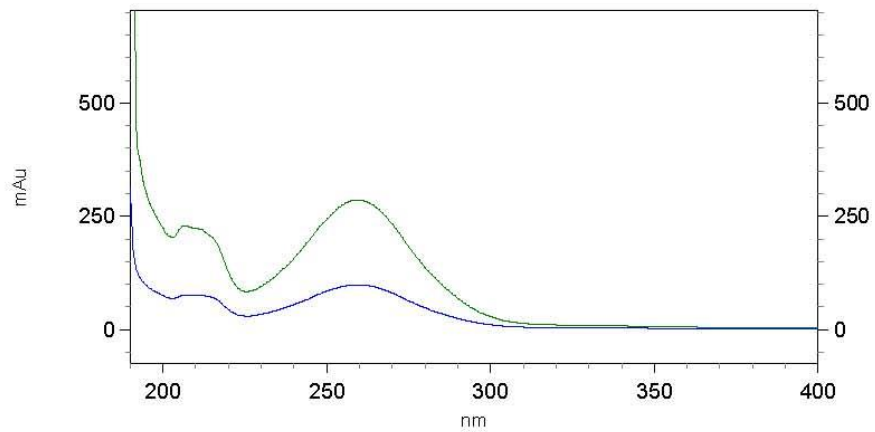

8: 264 nm, 4 nm

Results

| Name | Retention Time | Area Percent | Pk # |
|------|----------------|--------------|------|
|      | 45.860         | 50.203       | 1    |
|      | 71.580         | 49.797       | 2    |

|        |  |         |  |
|--------|--|---------|--|
| Totals |  | 100.000 |  |
|--------|--|---------|--|

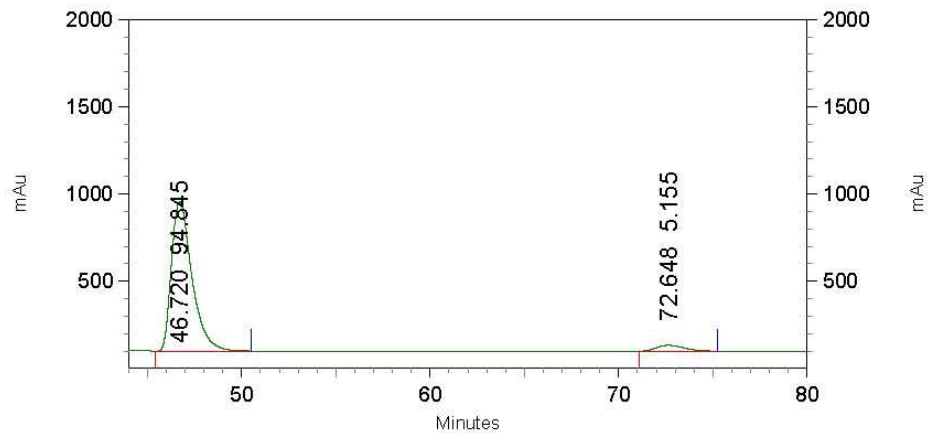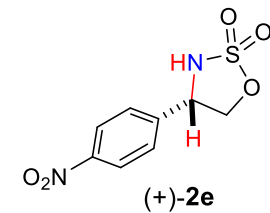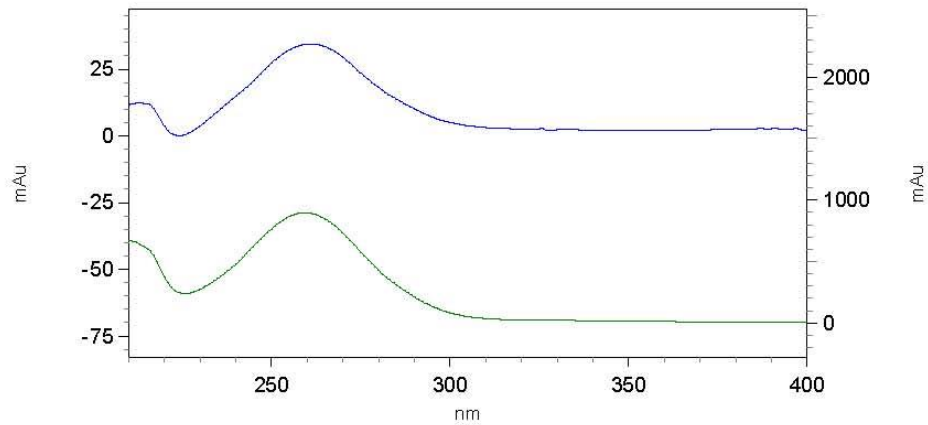

4: 264 nm, 4 nm

Results

| Name | Retention Time | Area Percent | Pk # |
|------|----------------|--------------|------|
|      | 46.720         | 94.845       | 1    |
|      | 72.648         | 5.155        | 2    |

|        |  |         |  |
|--------|--|---------|--|
| Totals |  | 100.000 |  |
|--------|--|---------|--|

## checkCIF/PLATON report

Structure factors have been supplied for datablock(s) C8H8N2O5S

THIS REPORT IS FOR GUIDANCE ONLY. IF USED AS PART OF A REVIEW PROCEDURE FOR PUBLICATION, IT SHOULD NOT REPLACE THE EXPERTISE OF AN EXPERIENCED CRYSTALLOGRAPHIC REFEREE.

No syntax errors found. CIF dictionary Interpreting this report

### Datablock: C8H8N2O5S

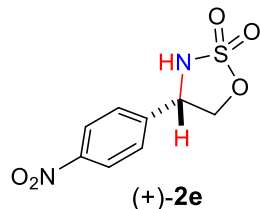

Bond precision: C-C = 0.0048 Å Wavelength=1.54178  
Cell: a=7.1996(2) b=9.8838(3) c=13.6772(5)  
alpha=90 beta=98.770(1) gamma=90  
Temperature: 100 K

|                        | Calculated    | Reported      |
|------------------------|---------------|---------------|
| Volume                 | 961.88(5)     | 961.88(5)     |
| Space group            | P 21          | P 21          |
| Hall group             | P 2yb         | P 2yb         |
| Moiety formula         | C8 H8 N2 O5 S | C8 H8 N2 O5 S |
| Sum formula            | C8 H8 N2 O5 S | C8 H8 N2 O5 S |
| Mr                     | 244.22        | 244.22        |
| Dx, g cm <sup>-3</sup> | 1.686         | 1.686         |
| Z                      | 4             | 4             |
| Mu (mm <sup>-1</sup> ) | 3.144         | 3.144         |
| F000                   | 504.0         | 504.0         |
| F000'                  | 507.07        |               |
| h, k, lmax             | 8, 11, 16     | 8, 11, 16     |
| Nref                   | 3521[ 1871]   | 3496          |
| Tmin, Tmax             | 0.465, 0.533  | 0.592, 0.753  |
| Tmin'                  | 0.318         |               |

Correction method= # Reported I Limits: Tmin=0.592 Tmax=0.753  
AbsCorr = MULTI-SCAN

Data completeness= 1.87/0.99 Theta(max)= 68.271

R(reflections)= 0.0351( 3485) wR2(reflections)= 0.0917( 3496)

S = 1.055 Npar= 323

The following ALERTS were generated. Each ALERT has the format  
test-name\_ALERT\_alert-type\_alert-level.  
Click on the hyperlinks for more details of the test.

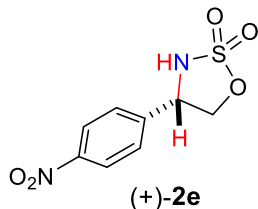

● Alert level C

|                   |                                                  |         |        |
|-------------------|--------------------------------------------------|---------|--------|
| PLAT089_ALERT_3_C | Poor Data / Parameter Ratio (Zmax < 18) .....    | 5.78    | Note   |
| PLAT094_ALERT_2_C | Ratio of Maximum / Minimum Residual Density .... | 2.12    | Report |
| PLAT340_ALERT_3_C | Low Bond Precision on C-C Bonds .....            | 0.00481 | Ang.   |
| PLAT430_ALERT_2_C | Short Inter D...A Contact O5 ..O6X               | 2.90    | Ang.   |
| PLAT911_ALERT_3_C | Missing FCF Refl Between Thmin & STh/L= 0.600    | 4       | Report |

● Alert level G

|                   |                                                  |       |              |
|-------------------|--------------------------------------------------|-------|--------------|
| PLAT002_ALERT_2_G | Number of Distance or Angle Restraints on AtSite | 12    | Note         |
| PLAT172_ALERT_4_G | The CIF-Embedded .res File Contains DFIX Records | 1     | Report       |
| PLAT175_ALERT_4_G | The CIF-Embedded .res File Contains SAME Records | 1     | Report       |
| PLAT176_ALERT_4_G | The CIF-Embedded .res File Contains SADI Records | 4     | Report       |
| PLAT230_ALERT_2_G | Hirshfeld Test Diff for O6 --C9                  | 10.0  | s.u.         |
| PLAT301_ALERT_3_G | Main Residue Disorder .....(Resd 1 )             | 19%   | Note         |
| PLAT395_ALERT_2_G | Deviating X-O-Y Angle From 120 for O6            | 111.1 | Degree       |
| PLAT395_ALERT_2_G | Deviating X-O-Y Angle From 120 for O6X           | 107.8 | Degree       |
| PLAT395_ALERT_2_G | Deviating X-O-Y Angle From 120 for O1            | 106.3 | Degree       |
| PLAT432_ALERT_2_G | Short Inter X...Y Contact O8 ..C9                | 3.01  | Ang.         |
| PLAT791_ALERT_4_G | Model has Chirality at C2 (Chiral SPGR)          | 5     | Verify       |
| PLAT791_ALERT_4_G | Model has Chirality at C10 (Chiral SPGR)         | 5     | Verify       |
| PLAT860_ALERT_3_G | Number of Least-Squares Restraints .....         | 10    | Note         |
| PLAT913_ALERT_3_G | Missing # of Very Strong Reflections in FCF .... | 2     | Note         |
| PLAT961_ALERT_5_G | Dataset Contains no Negative Intensities .....   |       | Please Check |
| PLAT978_ALERT_2_G | Number C-C Bonds with Positive Residual Density. | 5     | Info         |

0 ALERT level A = Most likely a serious problem - resolve or explain  
 0 ALERT level B = A potentially serious problem, consider carefully  
 5 ALERT level C = Check. Ensure it is not caused by an omission or oversight  
 16 ALERT level G = General information/check it is not something unexpected

0 ALERT type 1 CIF construction/syntax error, inconsistent or missing data  
 9 ALERT type 2 Indicator that the structure model may be wrong or deficient  
 6 ALERT type 3 Indicator that the structure quality may be low  
 5 ALERT type 4 Improvement, methodology, query or suggestion  
 1 ALERT type 5 Informative message, check

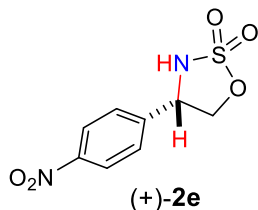

It is advisable to attempt to resolve as many as possible of the alerts in all categories. Often the minor alerts point to easily fixed oversights, errors and omissions in your CIF or refinement strategy, so attention to these fine details can be worthwhile. In order to resolve some of the more serious problems it may be necessary to carry out additional measurements or structure refinements. However, the purpose of your study may justify the reported deviations and the more serious of these should normally be commented upon in the discussion or experimental section of a paper or in the "special\_details" fields of the CIF. checkCIF was carefully designed to identify outliers and unusual parameters, but every test has its limitations and alerts that are not important in a particular case may appear. Conversely, the absence of alerts does not guarantee there are no aspects of the results needing attention. It is up to the individual to critically assess their own results and, if necessary, seek expert advice.

#### Publication of your CIF in IUCr journals

A basic structural check has been run on your CIF. These basic checks will be run on all CIFs submitted for publication in IUCr journals (*Acta Crystallographica*, *Journal of Applied Crystallography*, *Journal of Synchrotron Radiation*); however, if you intend to submit to *Acta Crystallographica Section C* or *E* or *IUCrData*, you should make sure that full publication checks are run on the final version of your CIF prior to submission.

#### Publication of your CIF in other journals

Please refer to the *Notes for Authors* of the relevant journal for any special instructions relating to CIF submission.

---

PLATON version of 23/04/2018; check.def file version of 23/04/2018

Datablock C8H8N2O5S - ellipsoid plot

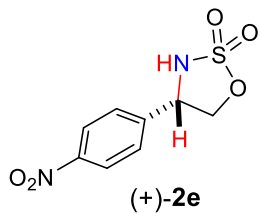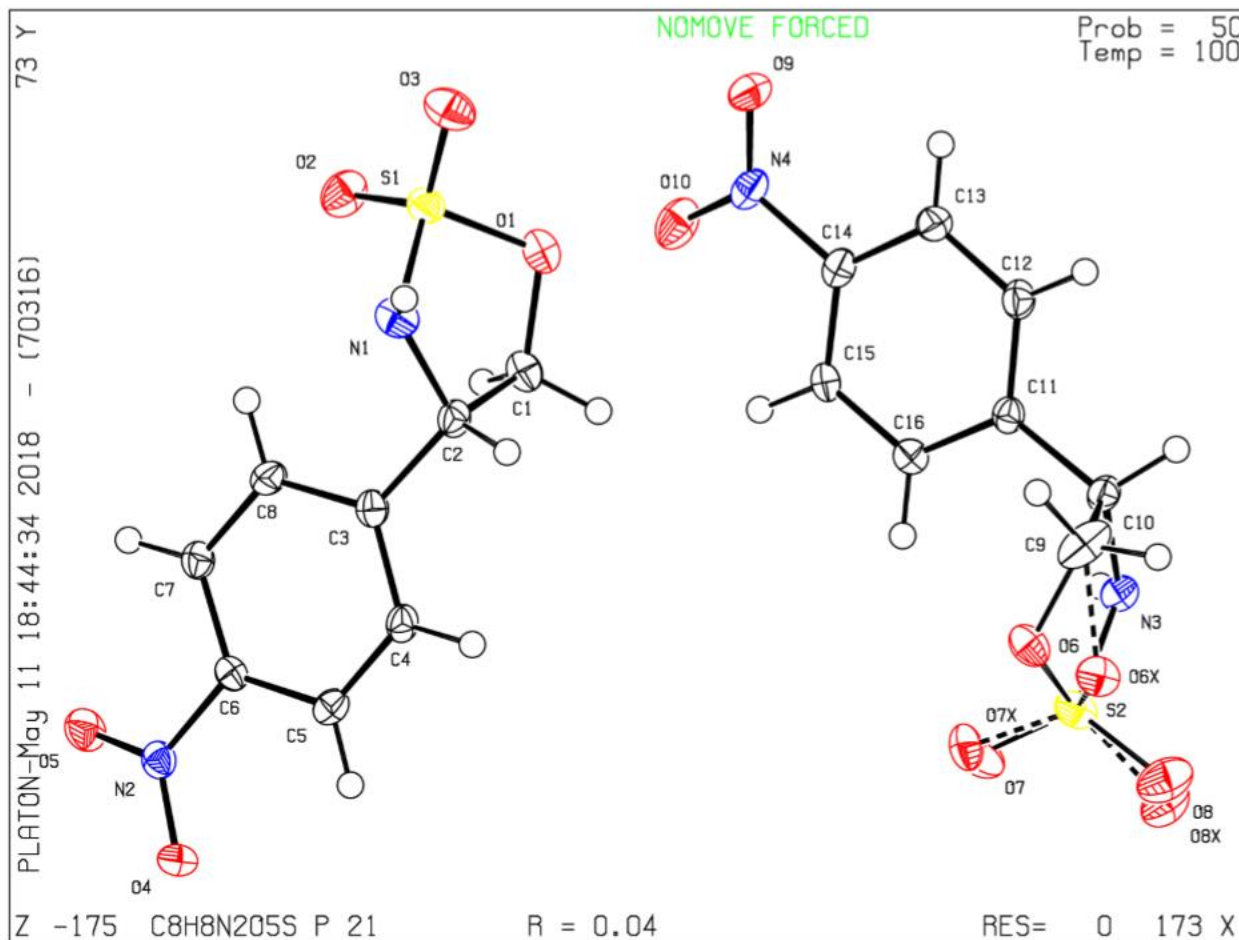



CHCl<sub>3</sub>

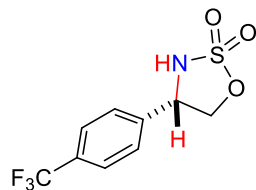

<sup>1</sup>H NMR of **2f**, 250 MHz, CDCl<sub>3</sub>

7.72  
7.68  
7.59  
7.56  
7.26

5.20  
5.18  
5.15  
5.12  
5.05  
5.02  
4.93  
4.91  
4.90  
4.87  
4.44  
4.41  
4.38

5.20  
5.18  
5.15  
5.12  
5.05  
5.02  
4.93  
4.91  
4.90  
4.87

4.44  
4.41  
4.38

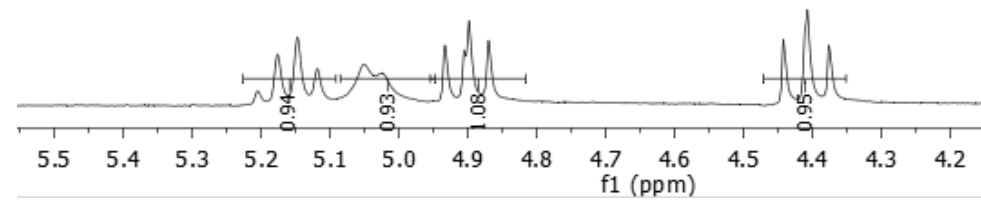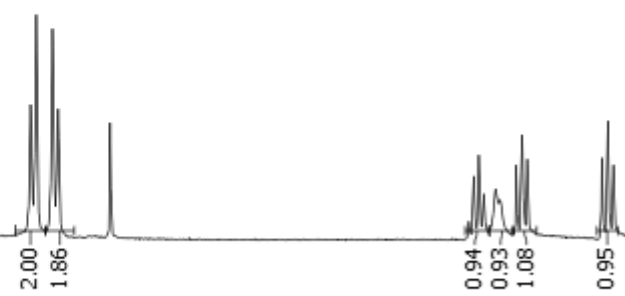

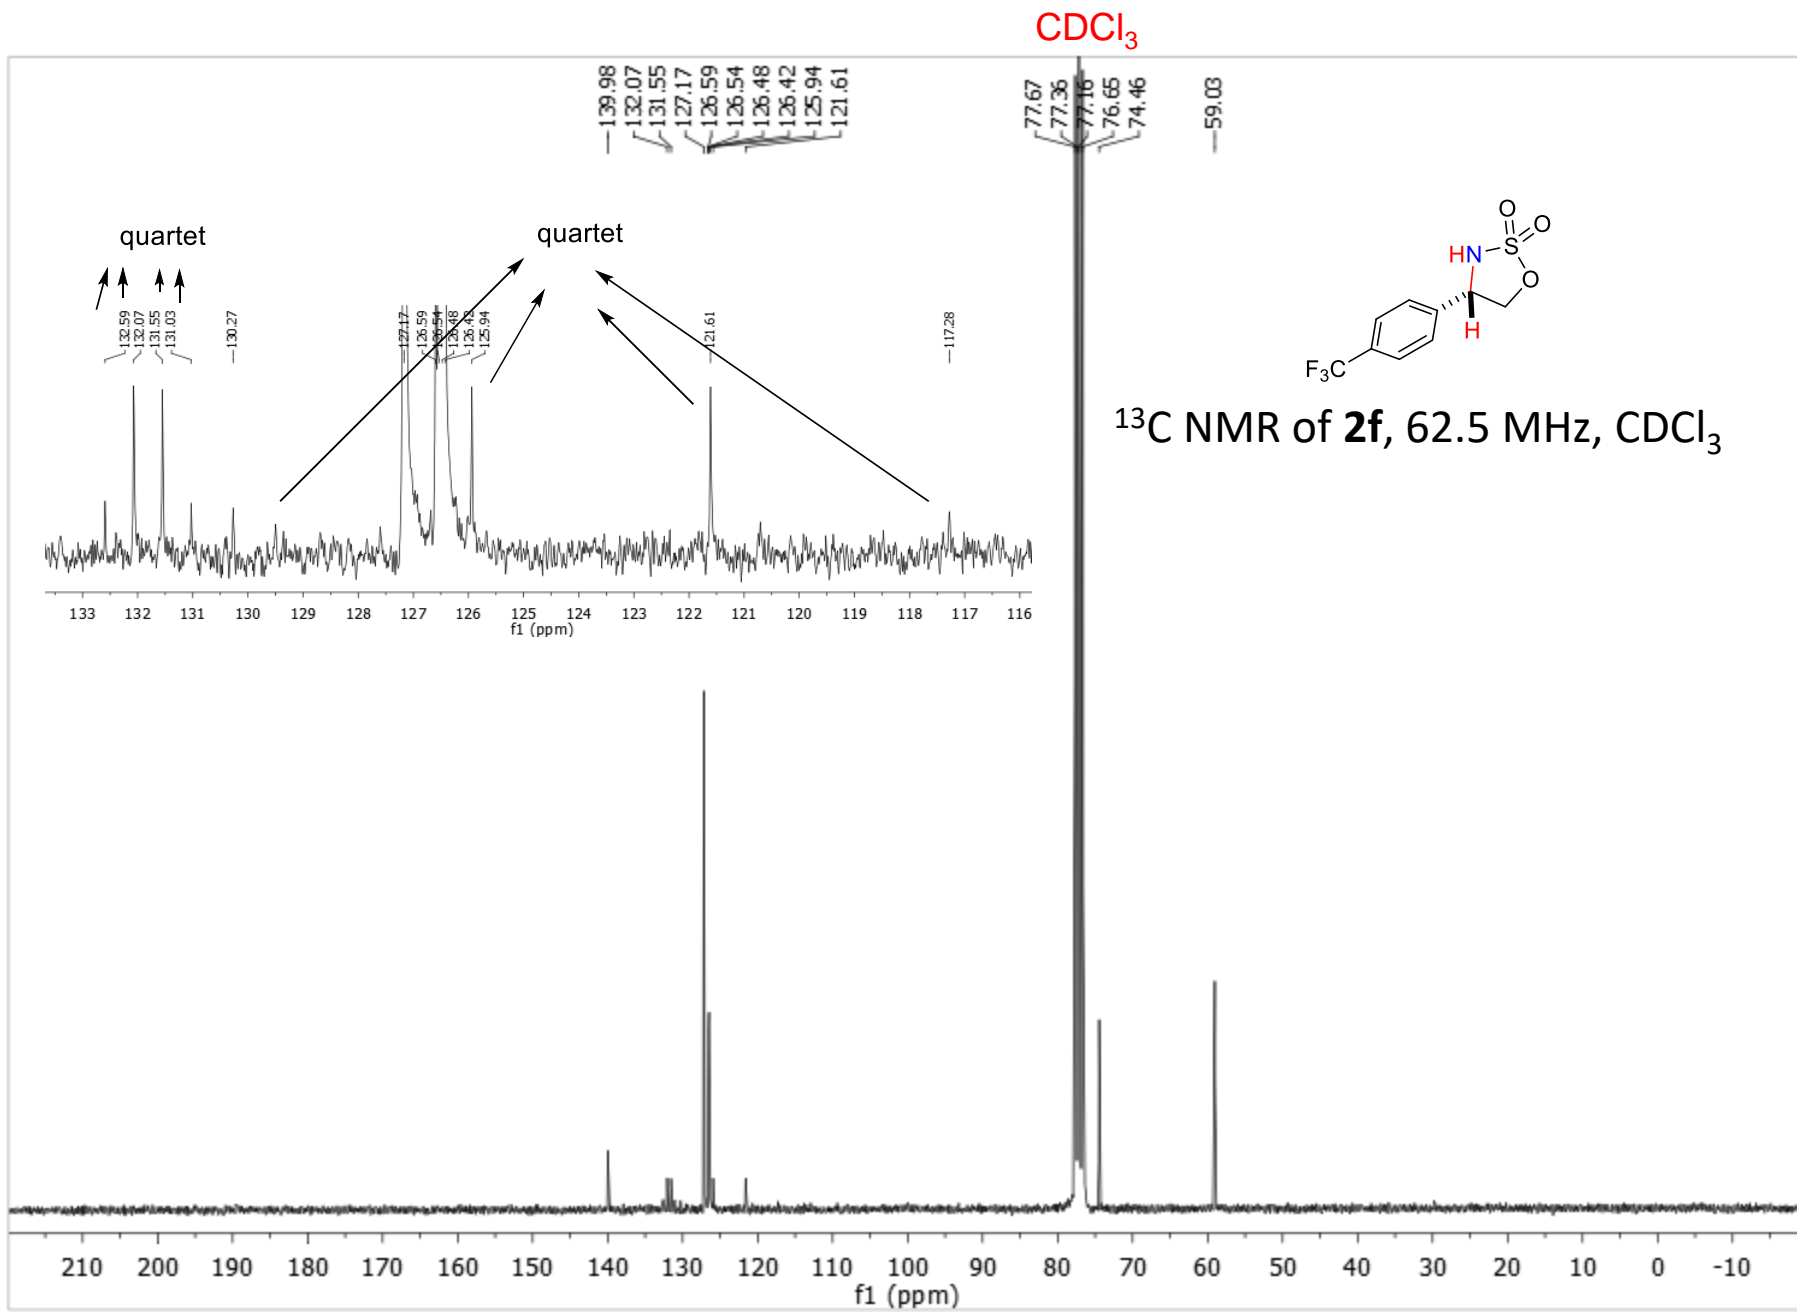

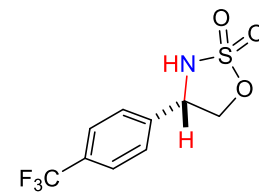

$^{19}\text{F}$  NMR of **2f**, 376 MHz,  $\text{CDCl}_3$

-62.88

0 20 10 0 -10 -20 -30 -40 -50 -60 -70 -80 -90 -110 -130 -150 -170 -190  
f1 (ppm)

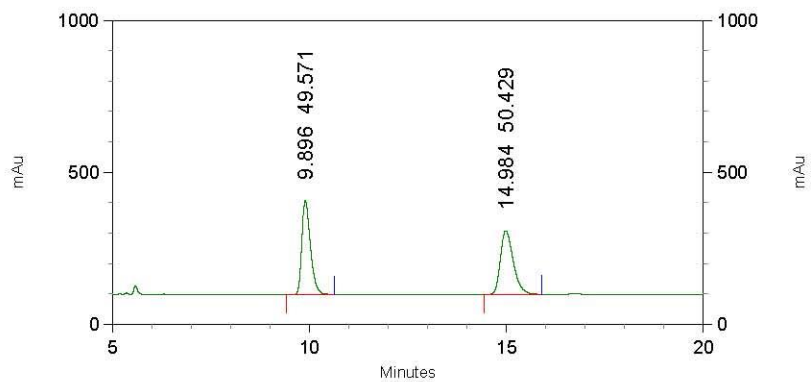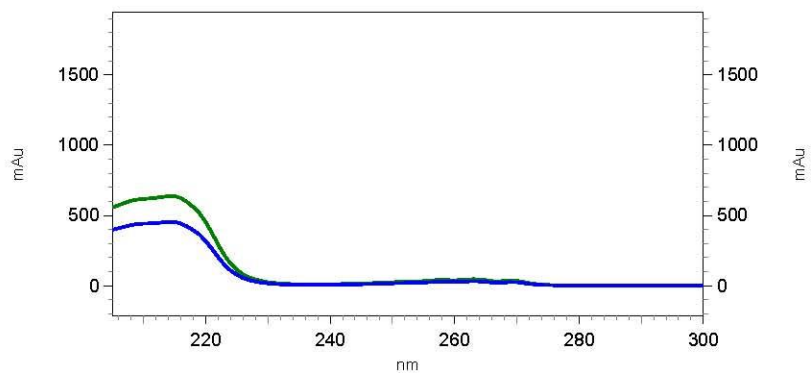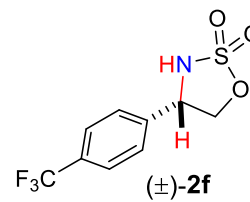

18: 222 nm, 4 nm  
Results

| Pk #   | Name | Retention Time | Area Percent |
|--------|------|----------------|--------------|
| 1      |      | 9.896          | 49.571       |
| 2      |      | 14.984         | 50.429       |
| Totals |      |                | 100.000      |

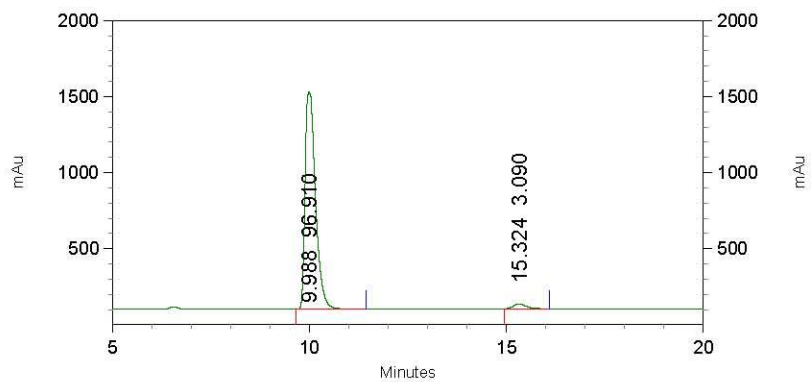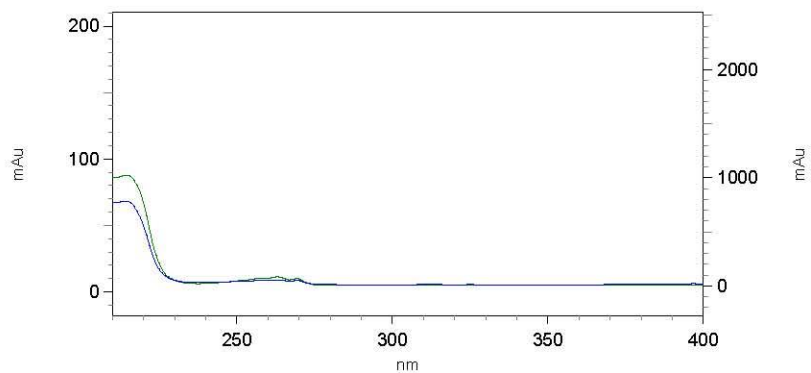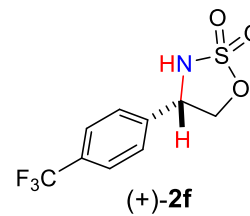

9: 204 nm, 4 nm  
Results

| Name   | Retention Time | Area Percent | Pk # |
|--------|----------------|--------------|------|
|        | 9.988          | 96.910       | 1    |
|        | 15.324         | 3.090        | 2    |
| Totals |                | 100.000      |      |

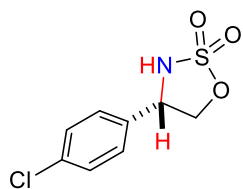

$^1\text{H}$  NMR of **2g**, 500 MHz,  $\text{CDCl}_3$

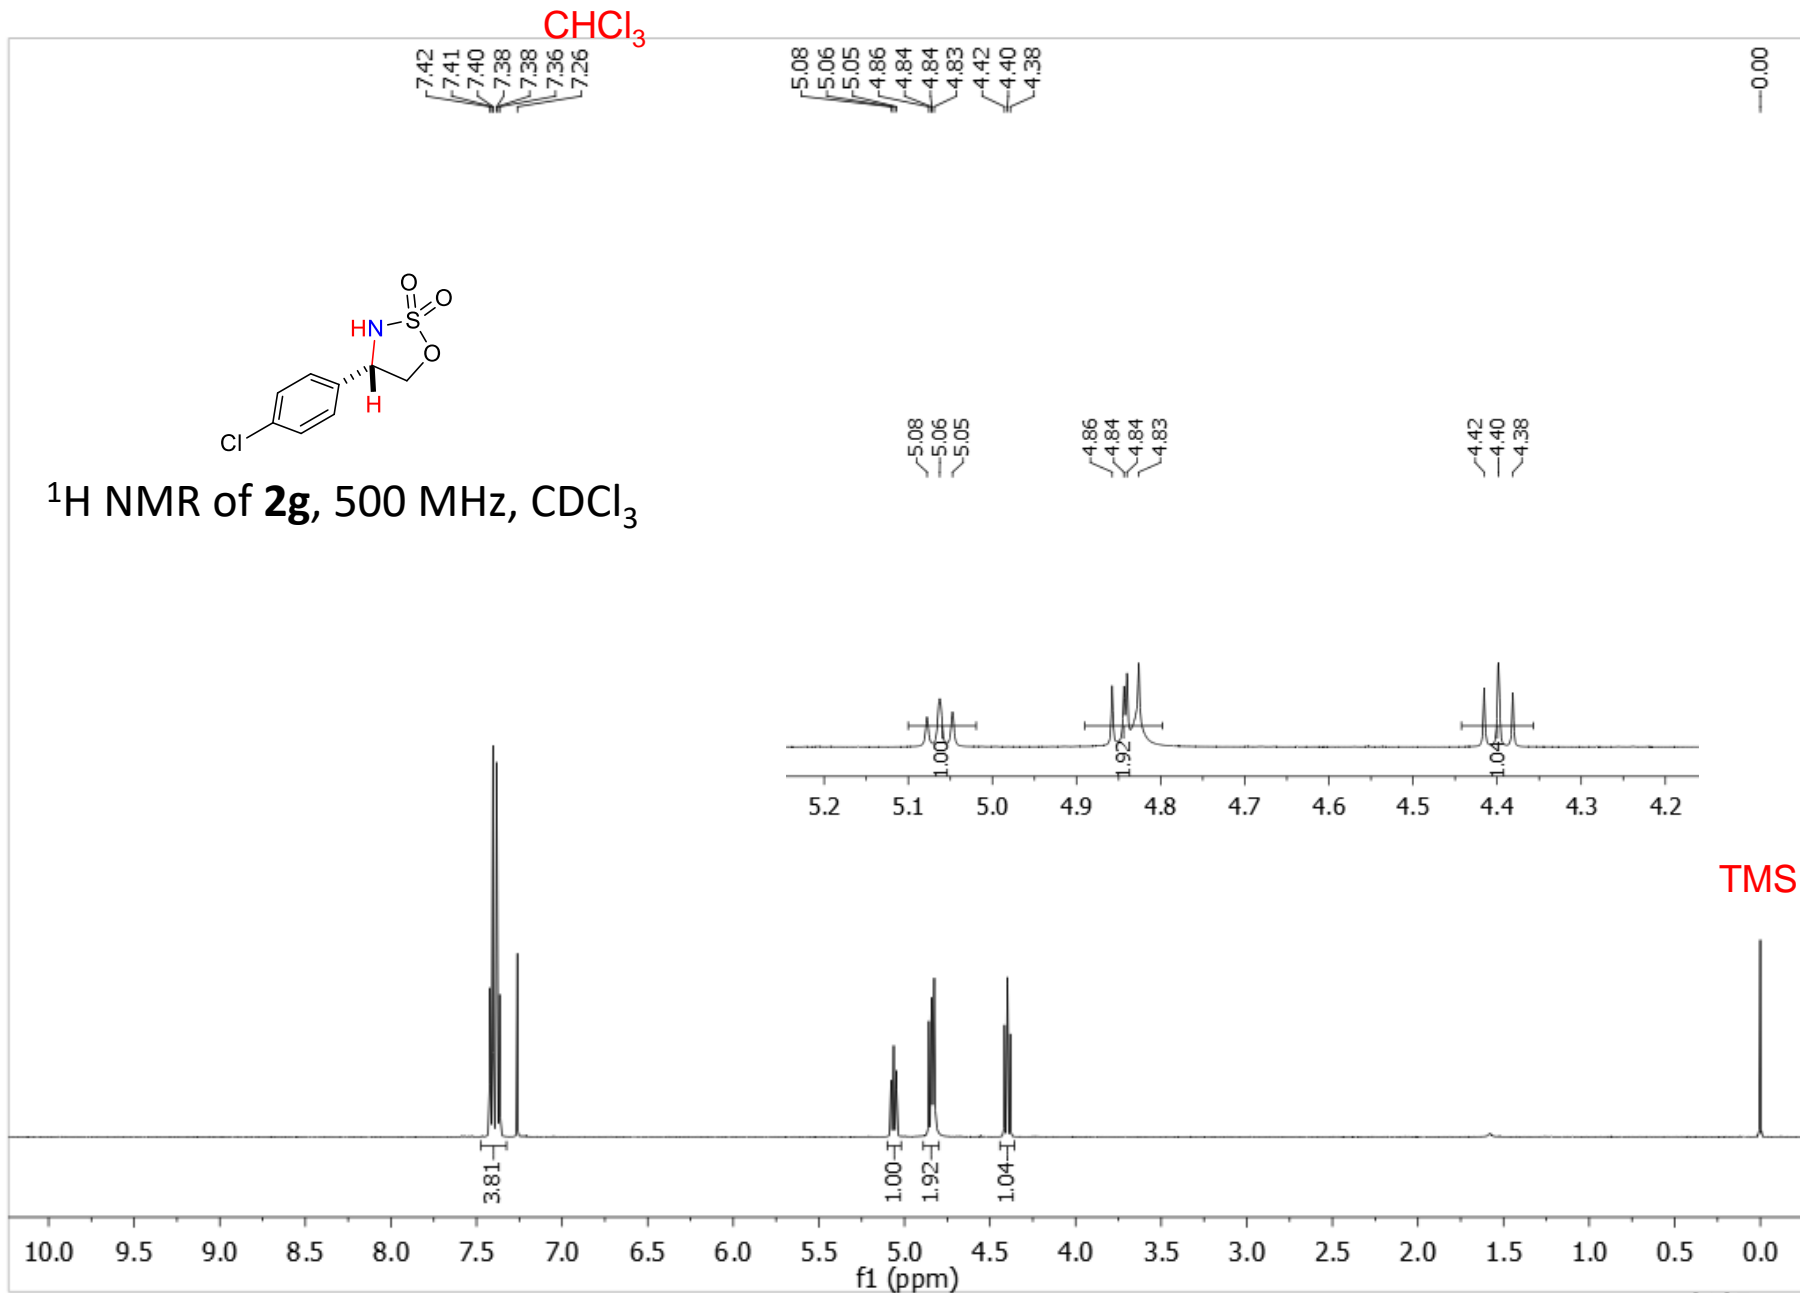

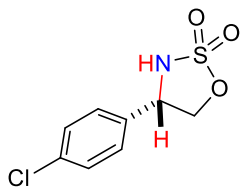

$^{13}\text{C}$  NMR of **2g**, 150 MHz,  $\text{CDCl}_3$

135.71  
134.28  
129.77  
128.18

$\text{CDCl}_3$

77.37  
77.16  
76.95  
74.73

59.07

135.71

134.28

129.77

128.18

140 135 130 125

230 220 210 200 190 180 170 160 150 140 130 120 110 100 90 80 70 60 50 40 30 20 10 0 -10  
f1 (ppm)

K0L-389-ADH-5%1.0

C:\EZStart\Projects\Default\Method\lk-5%1.0.met

C:\EZStart\Projects\Default\Data\K0L-389-ADH-5%1.0

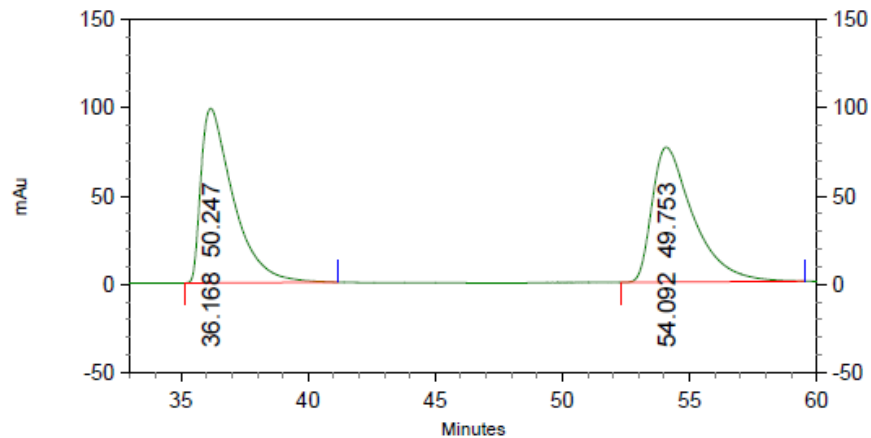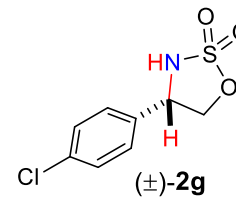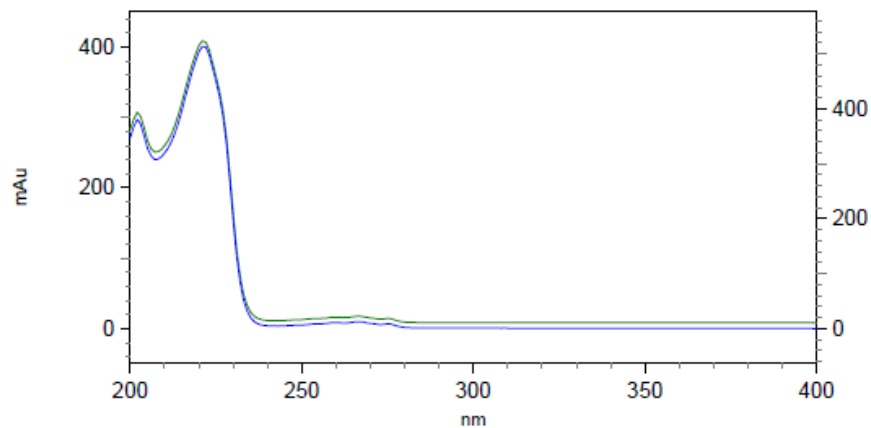

1: 232 nm, 4 nm

Results

| Name | Retention Time | Area Percent | Pk # |
|------|----------------|--------------|------|
|      | 36.168         | 50.247       | 1    |
|      | 54.092         | 49.753       | 2    |

|        |  |         |  |
|--------|--|---------|--|
| Totals |  | 100.000 |  |
|--------|--|---------|--|



K0L-388-ADH-5%1.0

C:\EZStart\Projects\Default\Method\lk-5%1.0.met

C:\EZStart\Projects\Default\Data\K0L-388-ADH-5%1.0

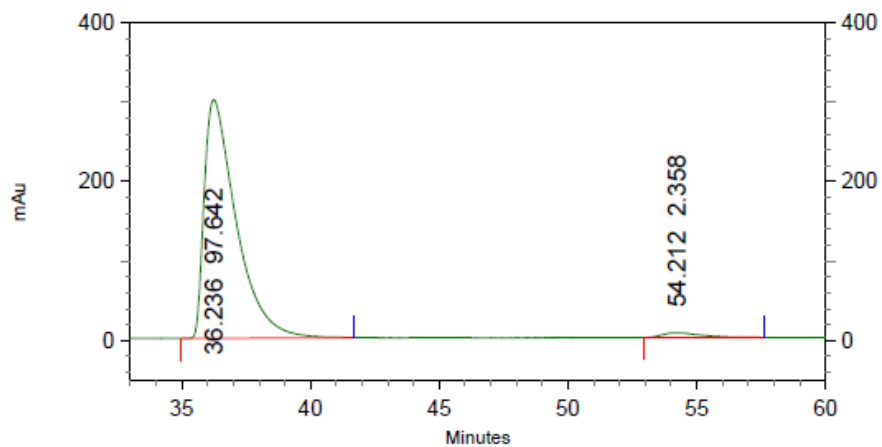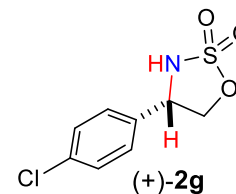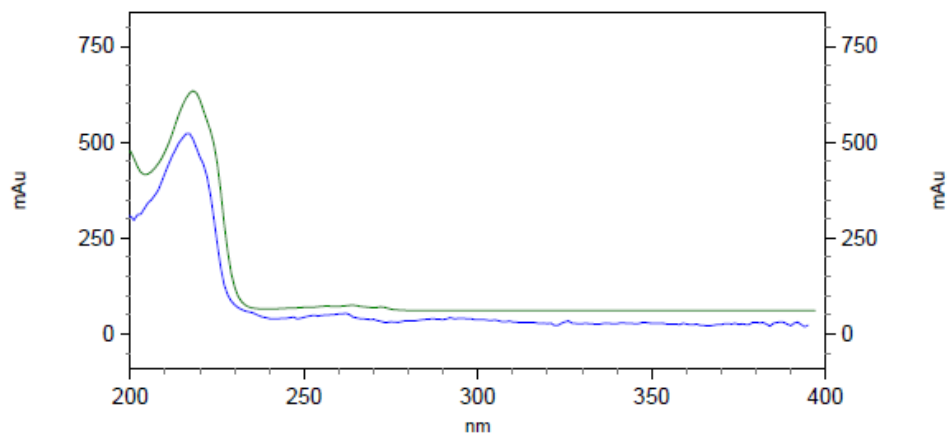

1: 232 nm, 4 nm

Results

| Name | Retention Time | Area Percent | Pk # |
|------|----------------|--------------|------|
|      | 36.236         | 97.642       | 1    |
|      | 54.212         | 2.358        | 2    |

|        |         |
|--------|---------|
| Totals | 100.000 |
|--------|---------|

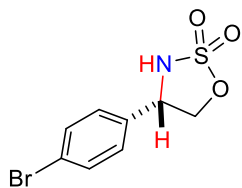

$^1\text{H}$  NMR of **2h**, 400 MHz,  $\text{CDCl}_3$

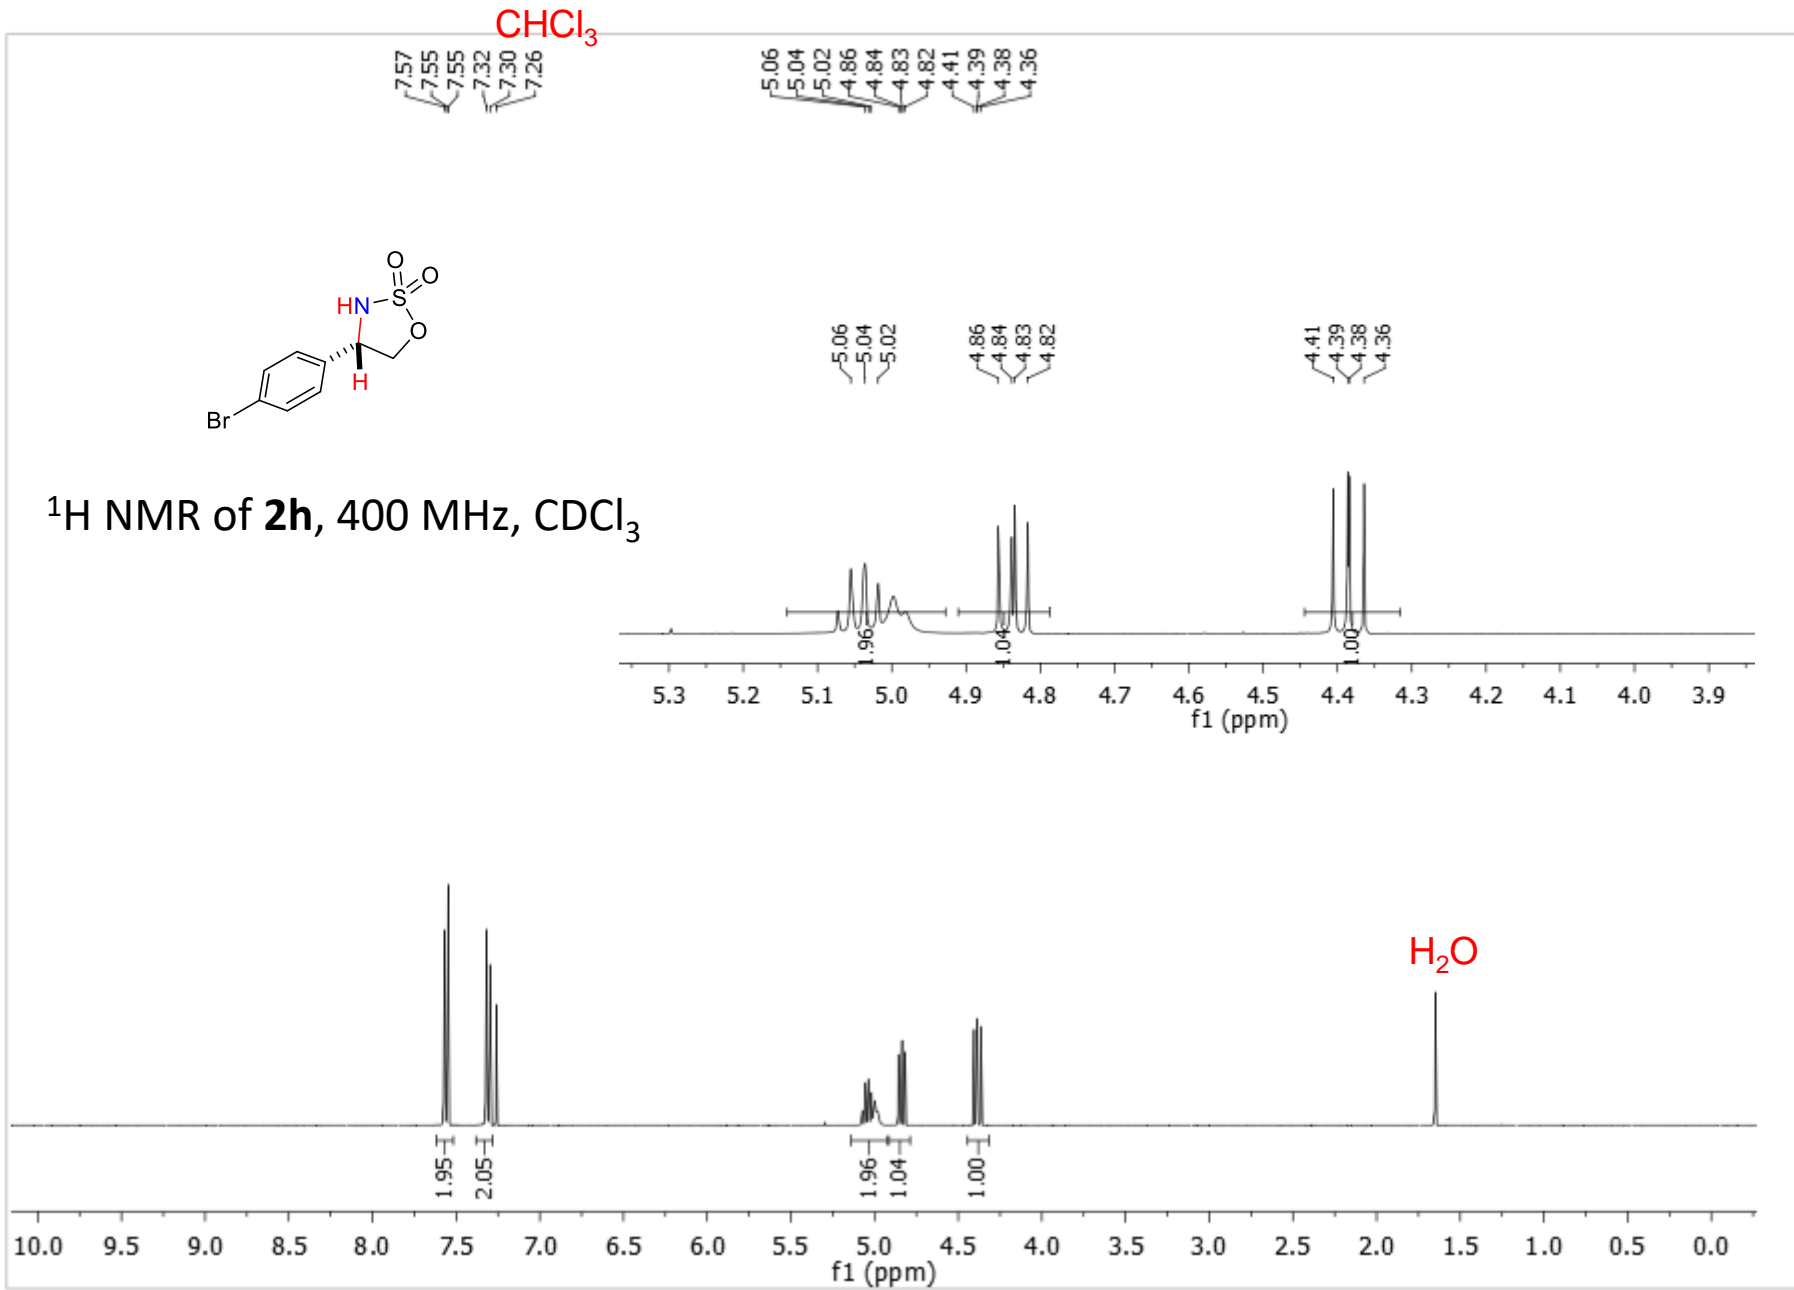

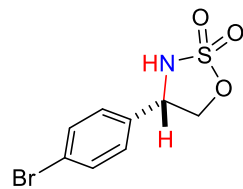

$^{13}\text{C}$  NMR of **2h**, 100 MHz,  $\text{CDCl}_3$

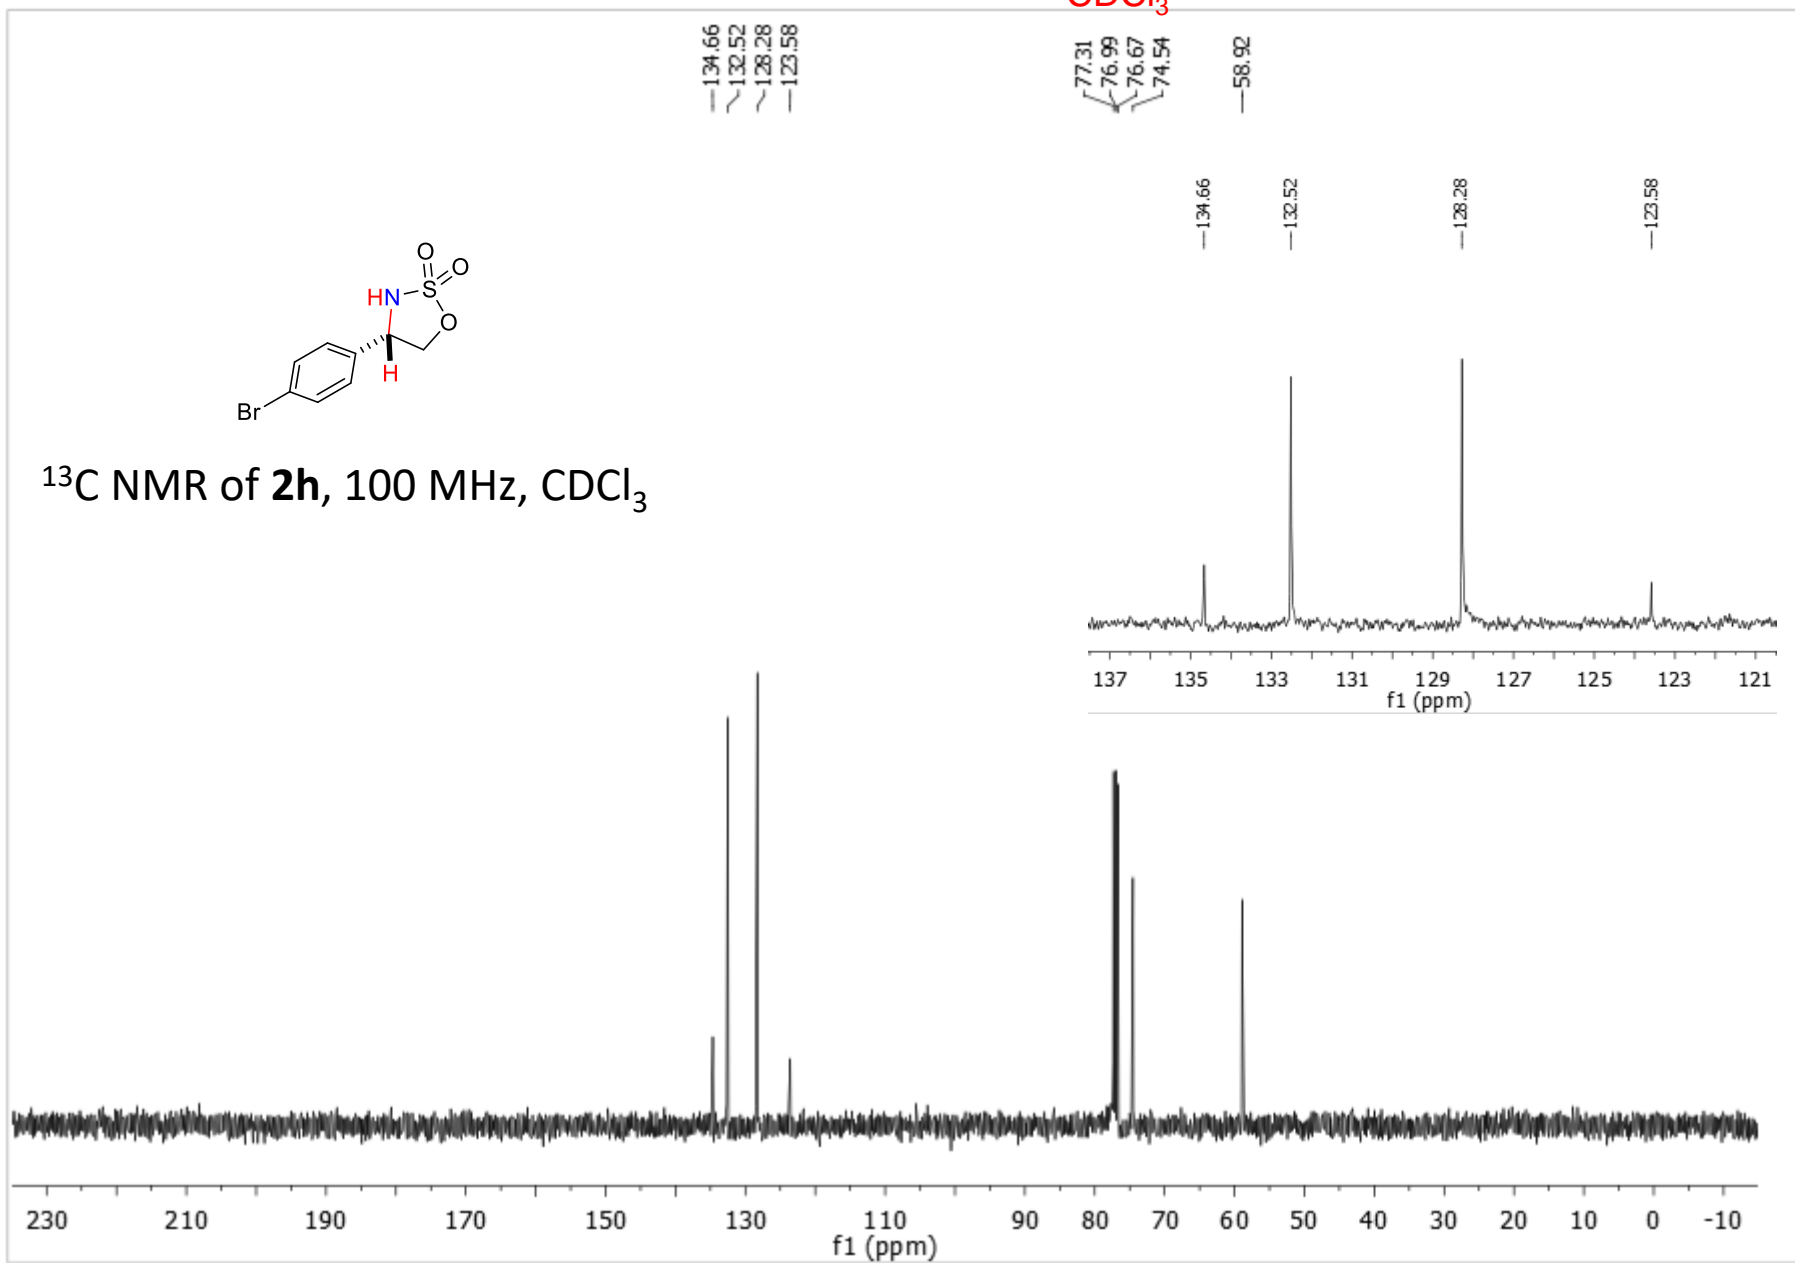

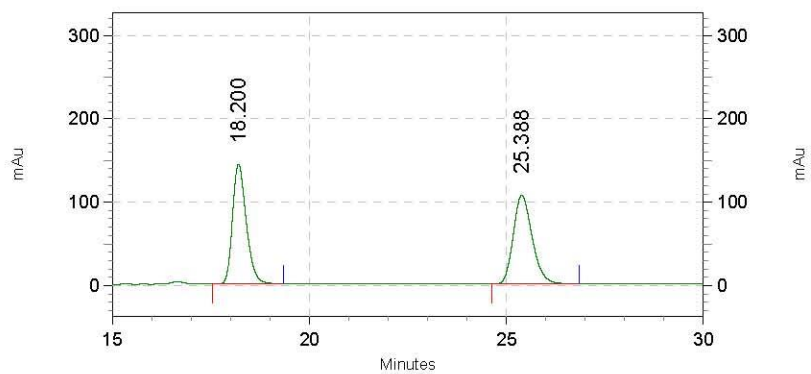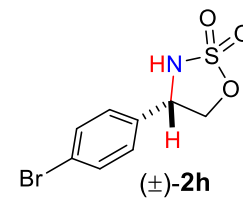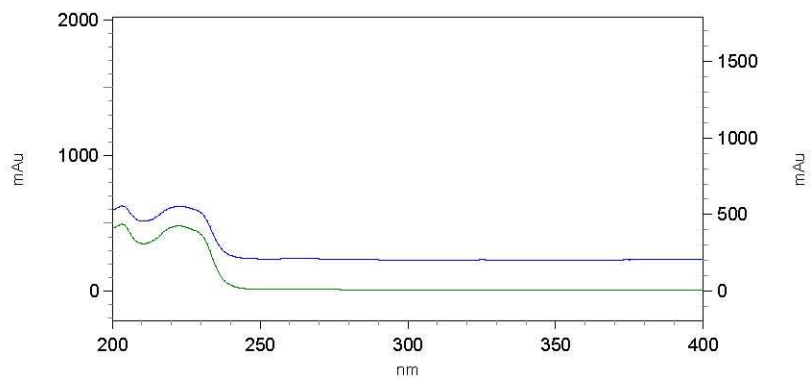

9: 233 nm, 4 nm  
Results

| Pk #   | Name | Retention Time | Area Percent |
|--------|------|----------------|--------------|
| 1      |      | 18.200         | 49.588       |
| 2      |      | 25.388         | 50.412       |
| Totals |      |                | 100.000      |

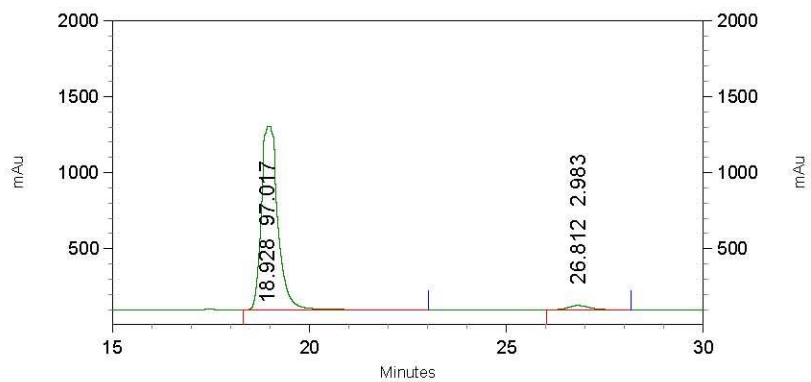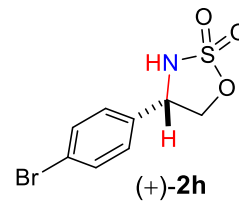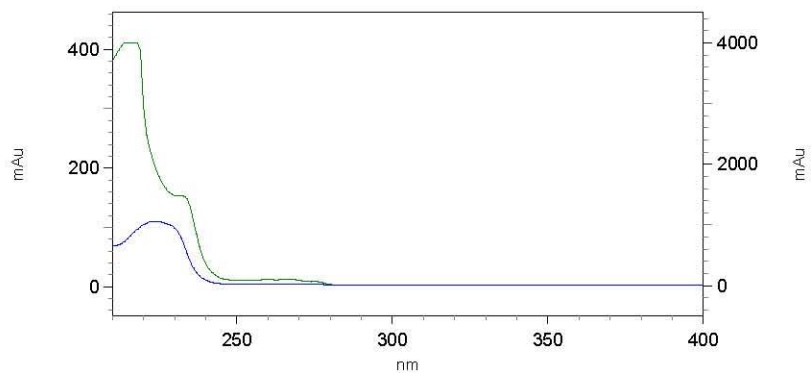

7: 217 nm, 4 nm  
Results

| Name   | Retention Time | Area Percent | Pk # |
|--------|----------------|--------------|------|
|        | 18.928         | 97.017       | 1    |
|        | 26.812         | 2.983        | 2    |
| Totals |                | 100.000      |      |

CHCl<sub>3</sub>

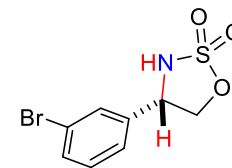

<sup>1</sup>H NMR of **2i**, 500 MHz, CDCl<sub>3</sub>

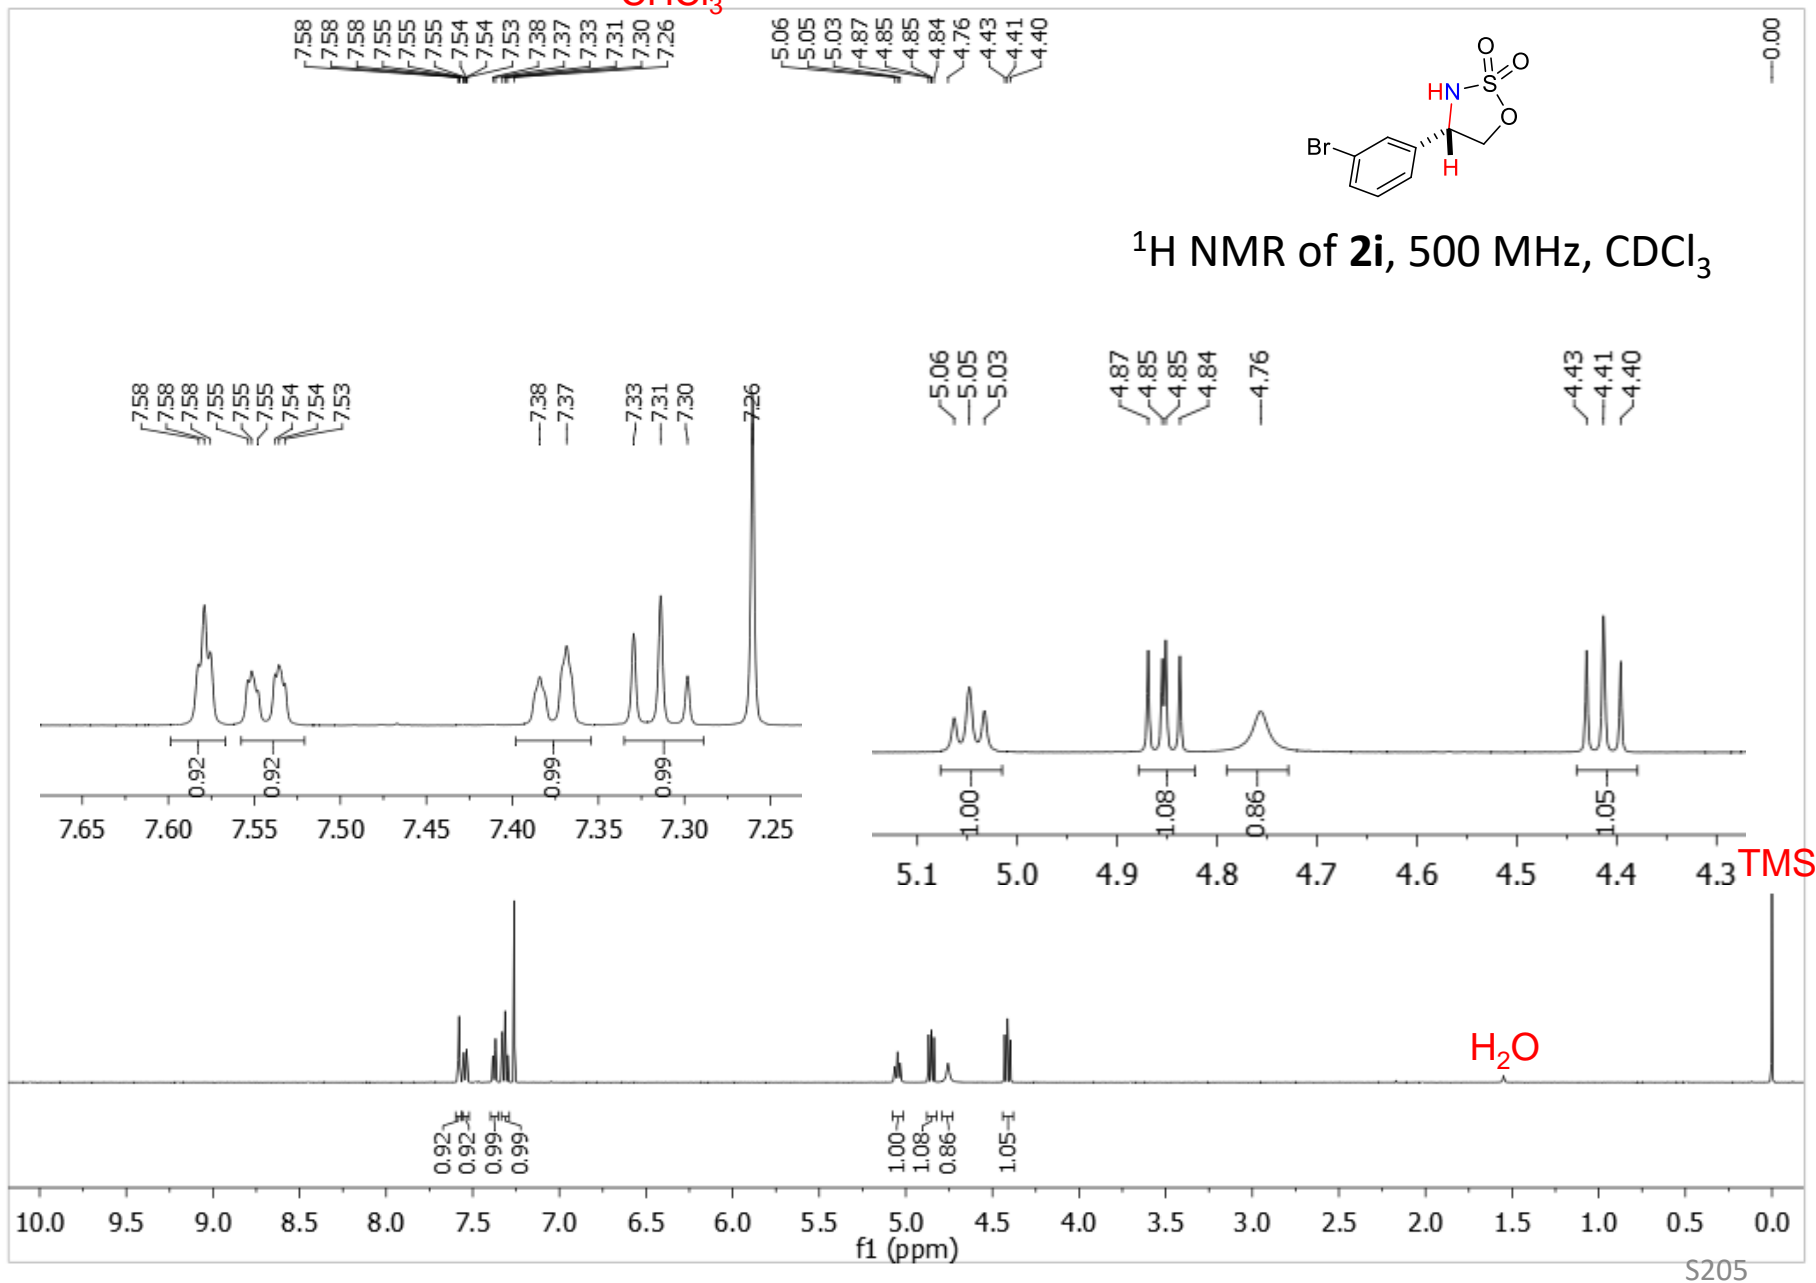

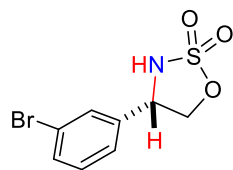

$^{13}\text{C}$  NMR of **2i**, 150 MHz,  $\text{CDCl}_3$

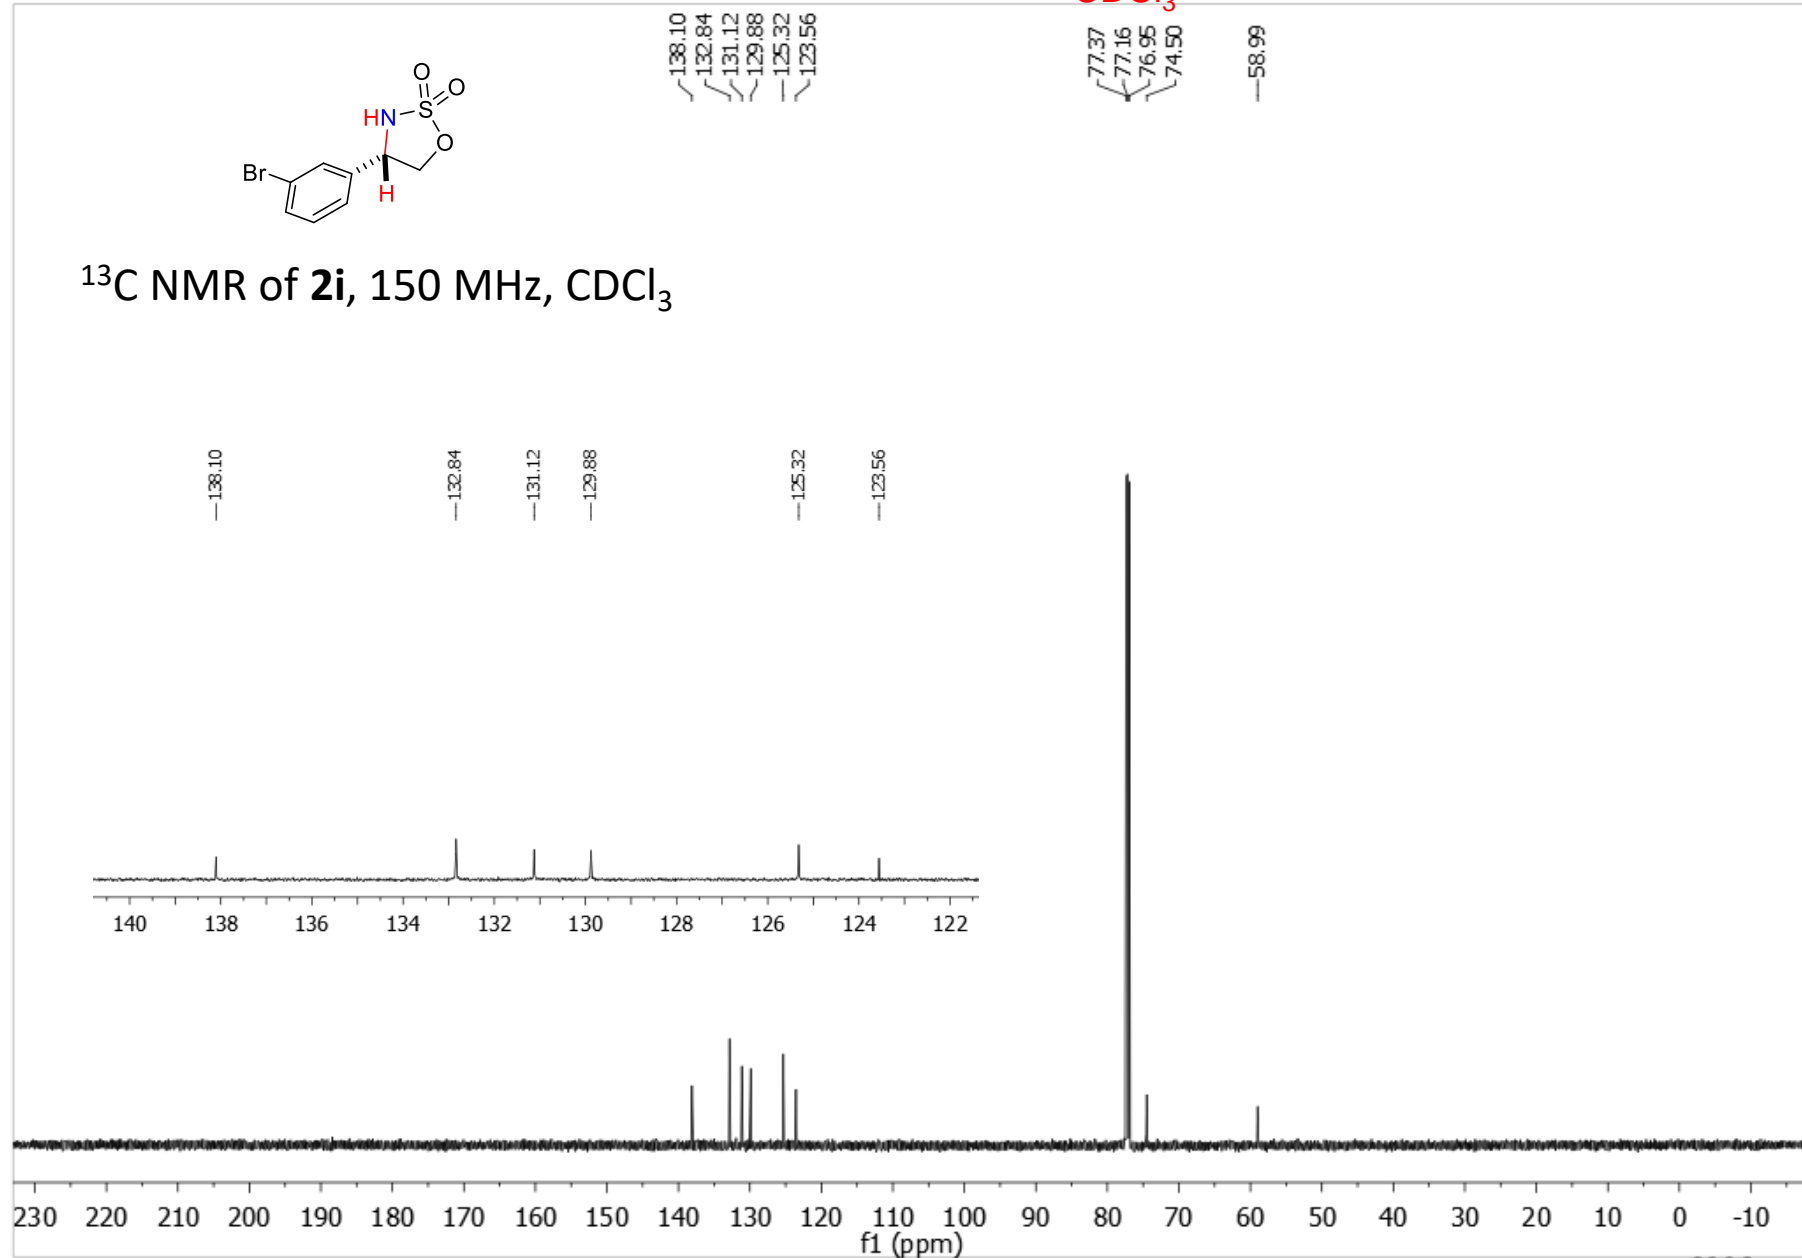

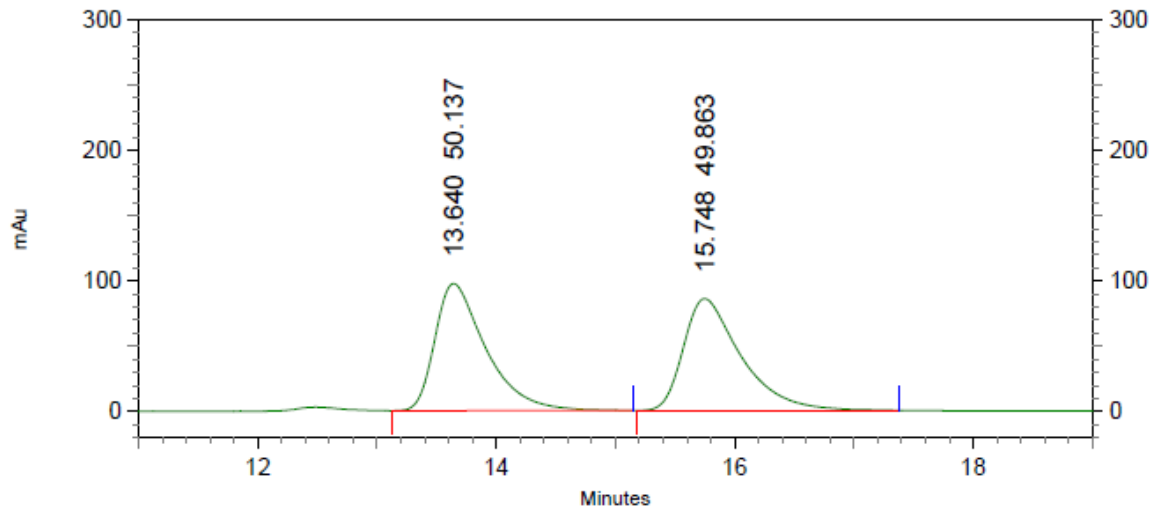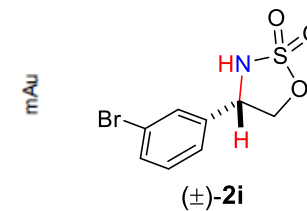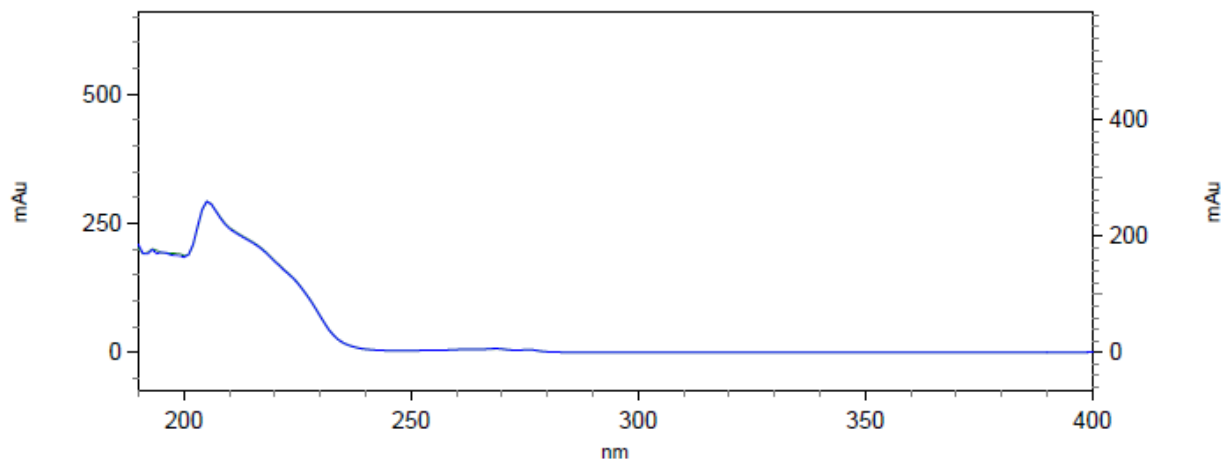

4: 228 nm, 4  
nm Results

| Pk #   | Retention Time | Area Percent |
|--------|----------------|--------------|
| 1      | 13.640         | 50.137       |
| 2      | 15.748         | 49.863       |
| Totals |                | 100.000      |



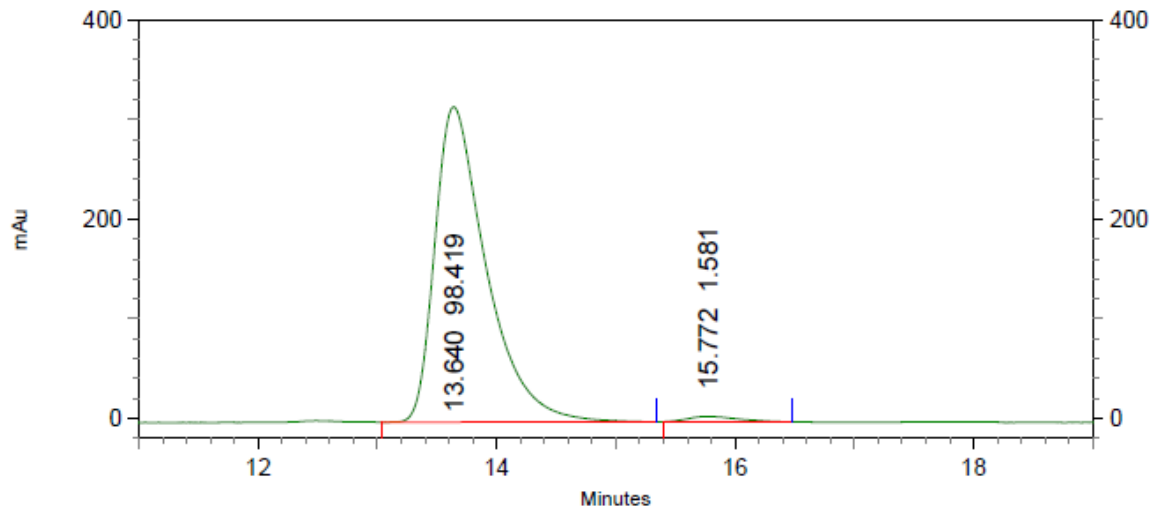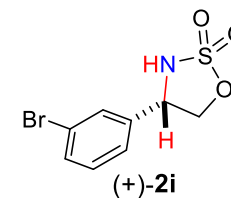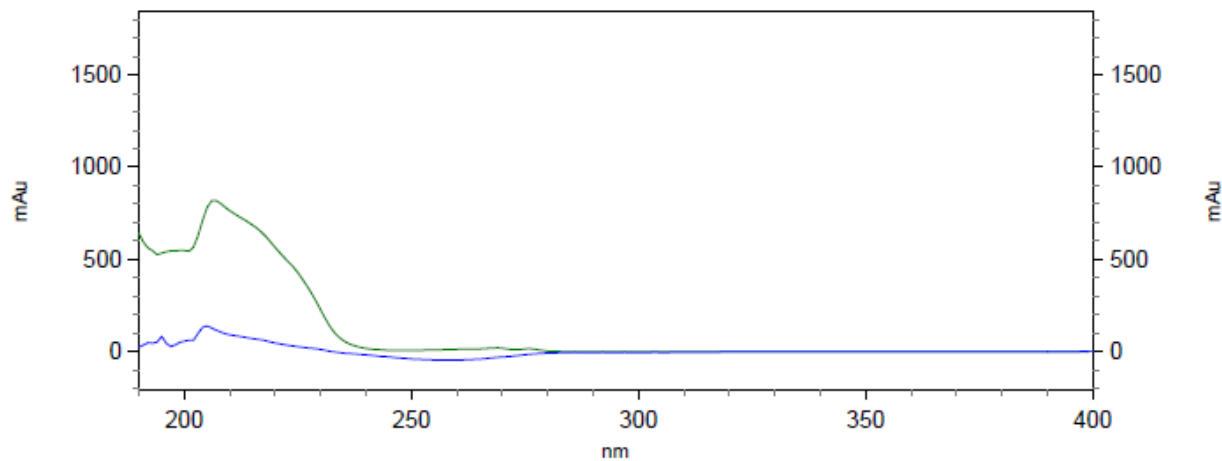

4: 228 nm, 4  
nm Results

| Pk # | Retention Time | Area Percent |
|------|----------------|--------------|
| 1    | 13.640         | 98.419       |
| 2    | 15.772         | 1.581        |

|        |         |
|--------|---------|
| Totals | 100.000 |
|--------|---------|

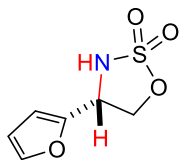

$^1\text{H}$  NMR of **2j**, 600 MHz,  $\text{CDCl}_3$

$\text{CHCl}_3$

7.48  
7.48  
7.26  
6.51  
6.50  
6.42  
6.42  
6.42  
6.41  
5.13  
5.12  
5.11  
5.09  
4.77  
4.76  
4.75  
4.73  
4.67  
4.66  
4.64

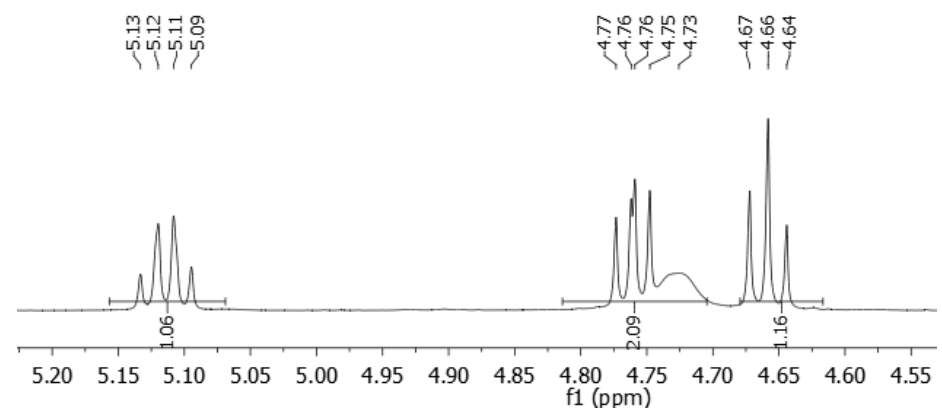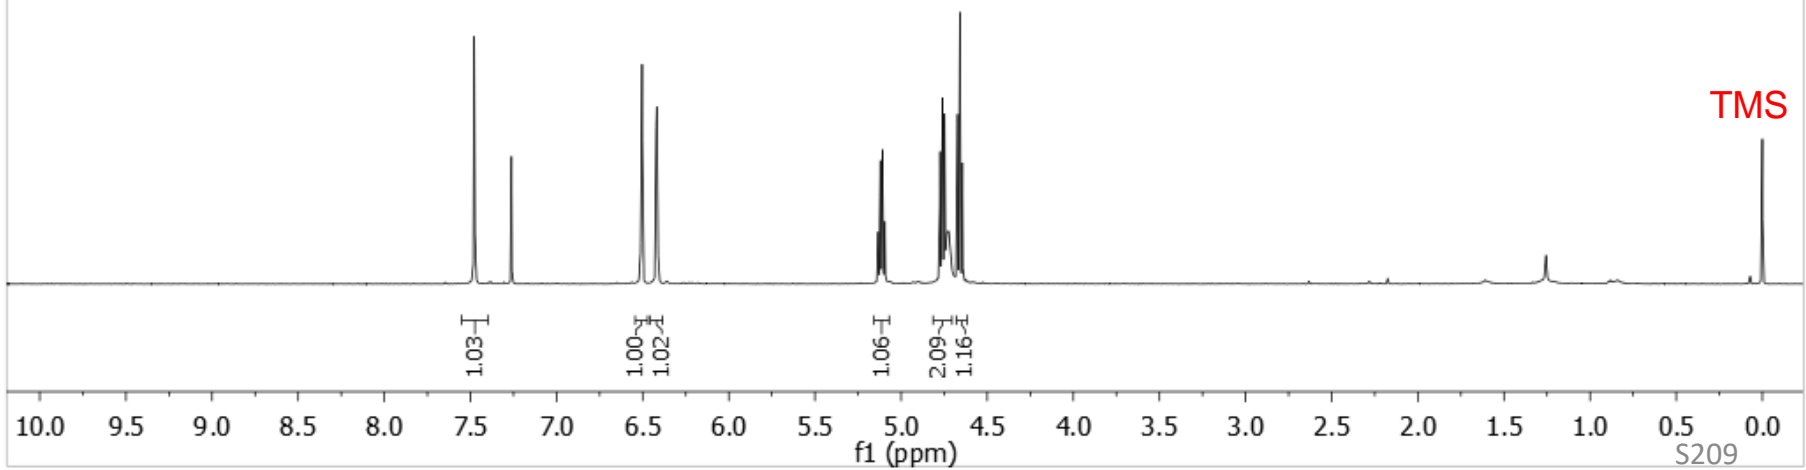



$^{13}\text{C}$  NMR of **2j**, 150 MHz,  $\text{CDCl}_3$

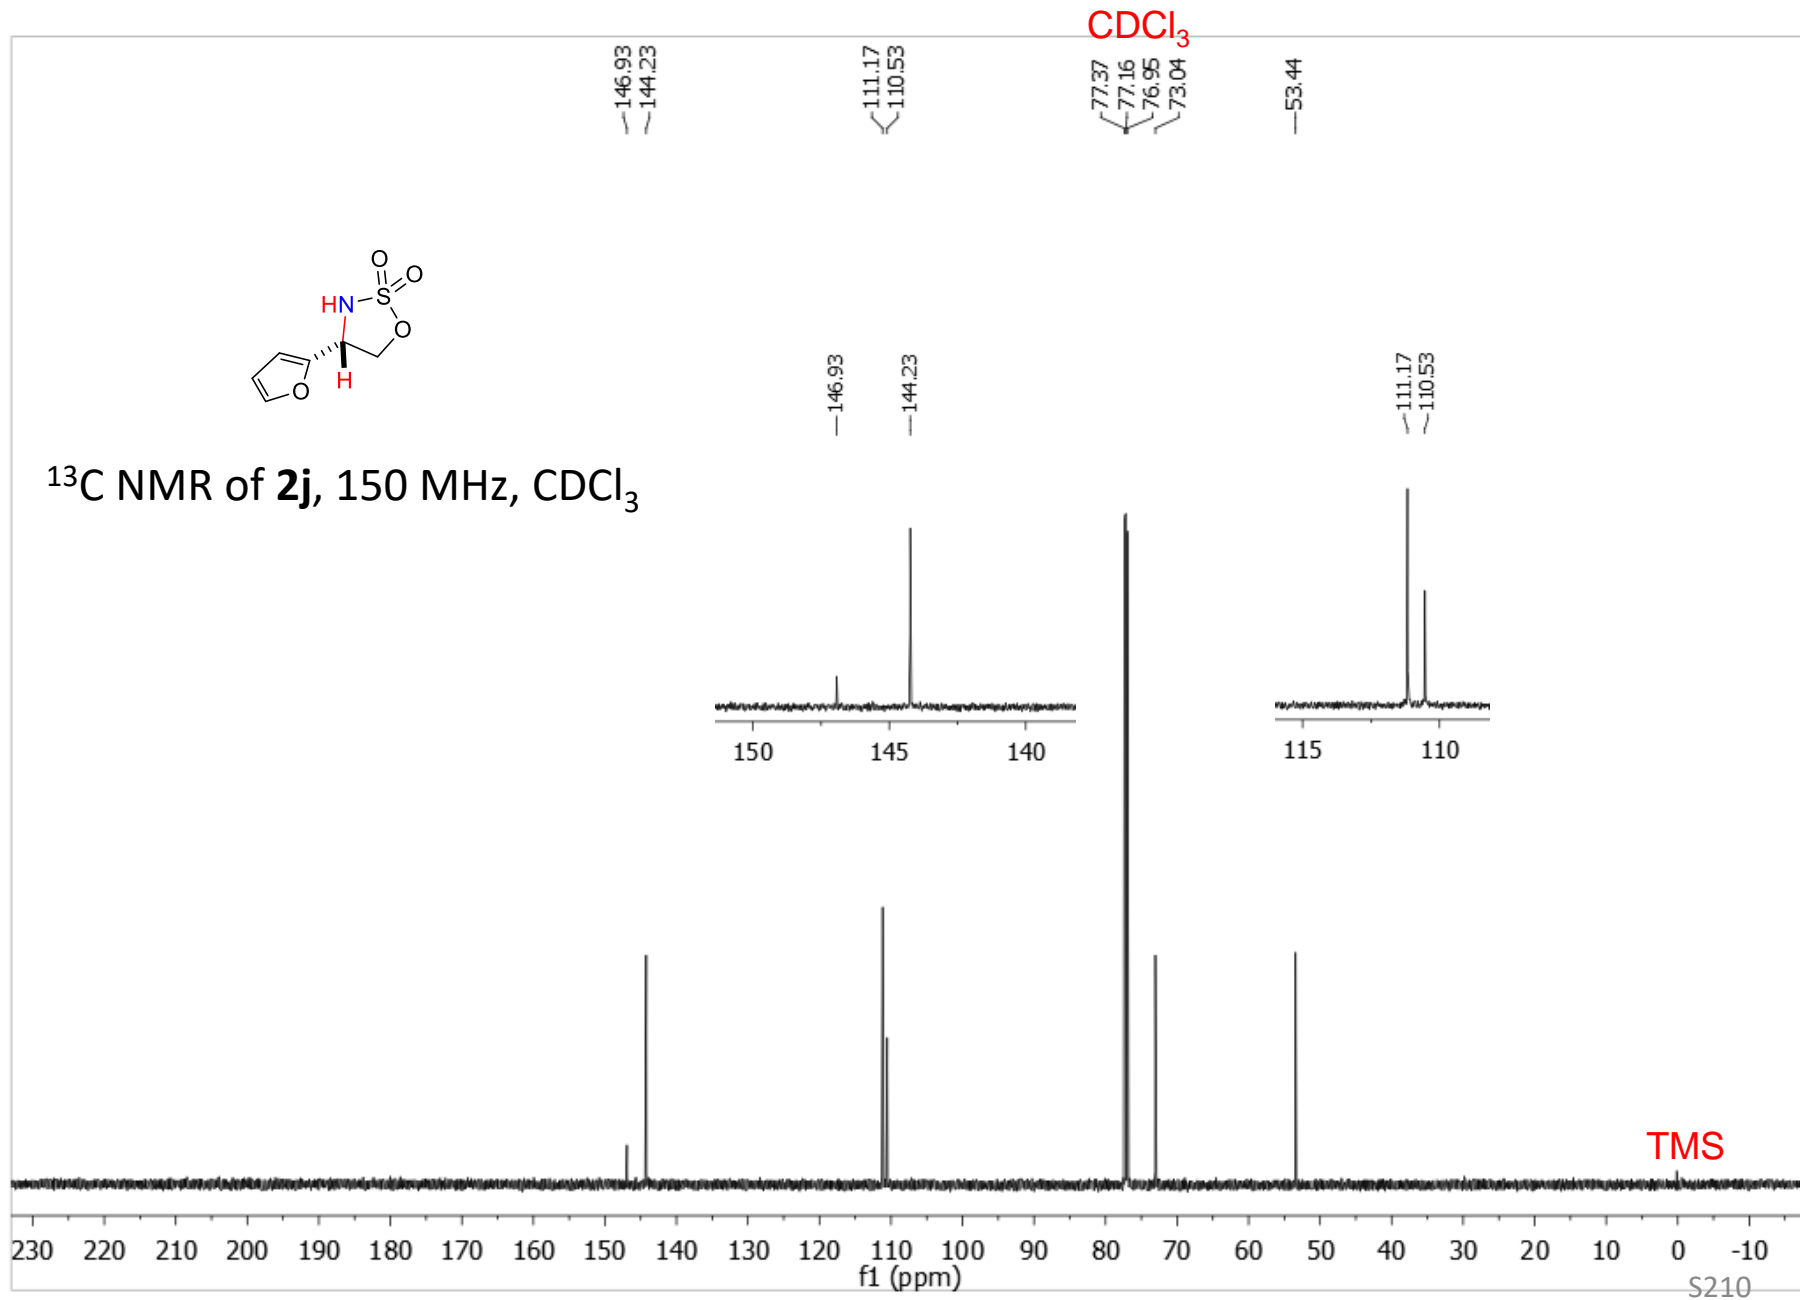

K0L-3580DH-10%

C:\EZStart\Projects\Default\Method\1k7%1.0.met

C:\EZStart\Projects\Default\Data\K0L-3580DH-10%

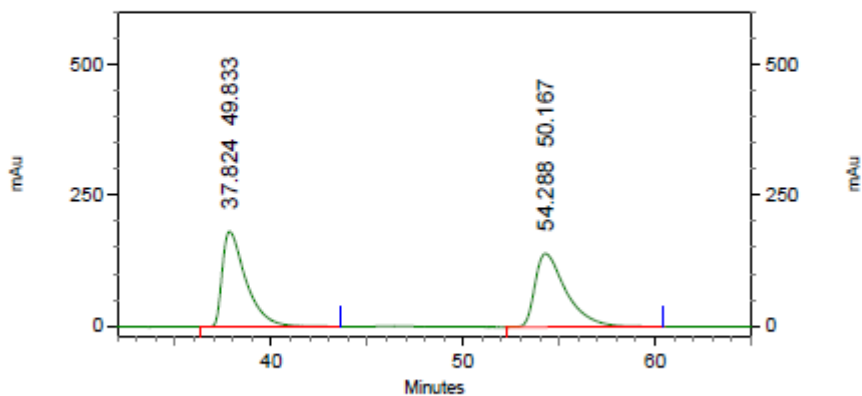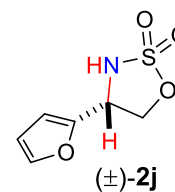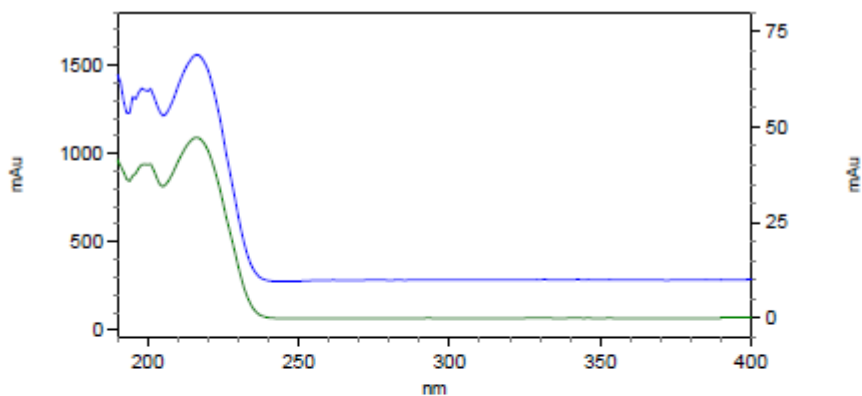

4: 221 nm, 4 nm

Results

| Name | Retention Time | Area Percent | Pk # |
|------|----------------|--------------|------|
|      | 37.824         | 49.833       | 1    |
|      | 54.288         | 50.167       | 2    |

|        |  |         |  |
|--------|--|---------|--|
| Totals |  | 100.000 |  |
|--------|--|---------|--|

K0L-357-ODH-10%-1

C:\EZStart\Projects\Default\Method\lk7%1.0.met

C:\EZStart\Projects\Default\Data\K0L-357-ODH-10%-1

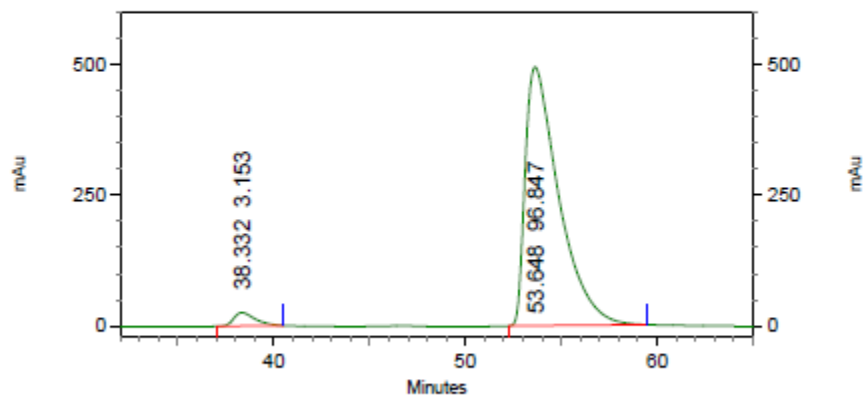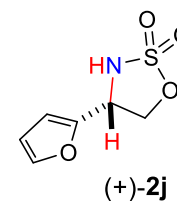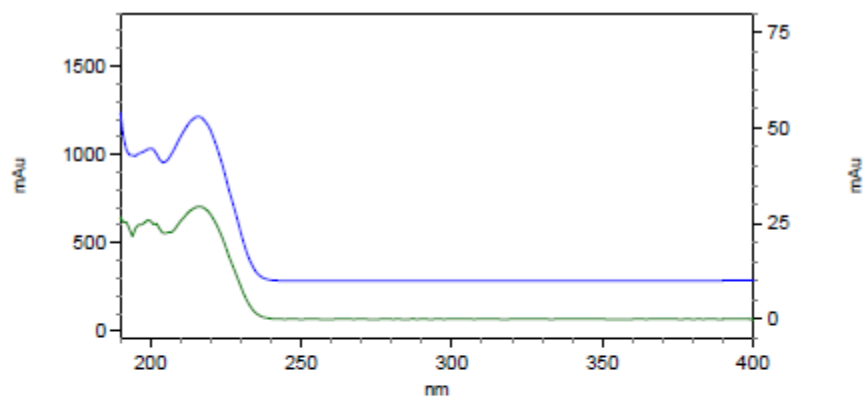

4: 224 nm, 4 nm

Results

| Name | Retention Time | Area Percent | Pk # |
|------|----------------|--------------|------|
|      | 38.332         | 3.153        | 1    |
|      | 53.648         | 96.847       | 2    |

Totals

100.000

CHCl<sub>3</sub>

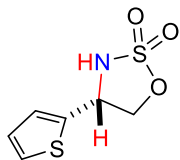

<sup>1</sup>H NMR of **2k**, 400 MHz, CDCl<sub>3</sub>

7.39  
7.38  
7.26  
7.18  
7.17  
7.17  
7.05  
7.04  
7.04  
7.03

5.34  
5.32  
4.86  
4.85  
4.84  
4.82  
4.57  
4.55  
4.53

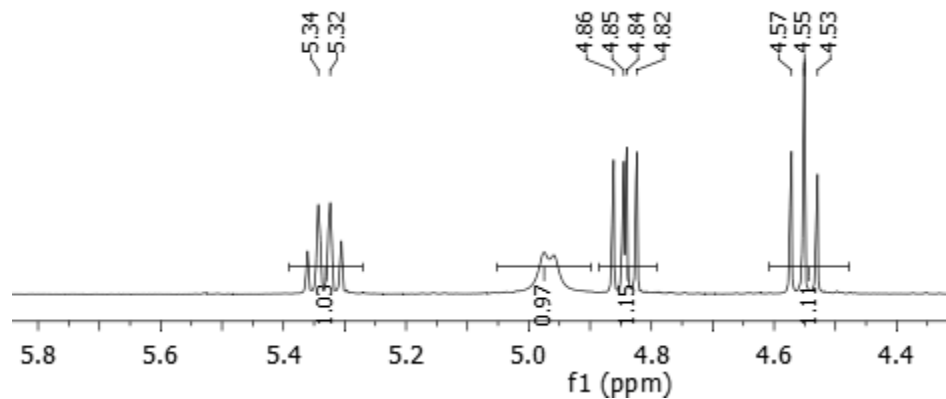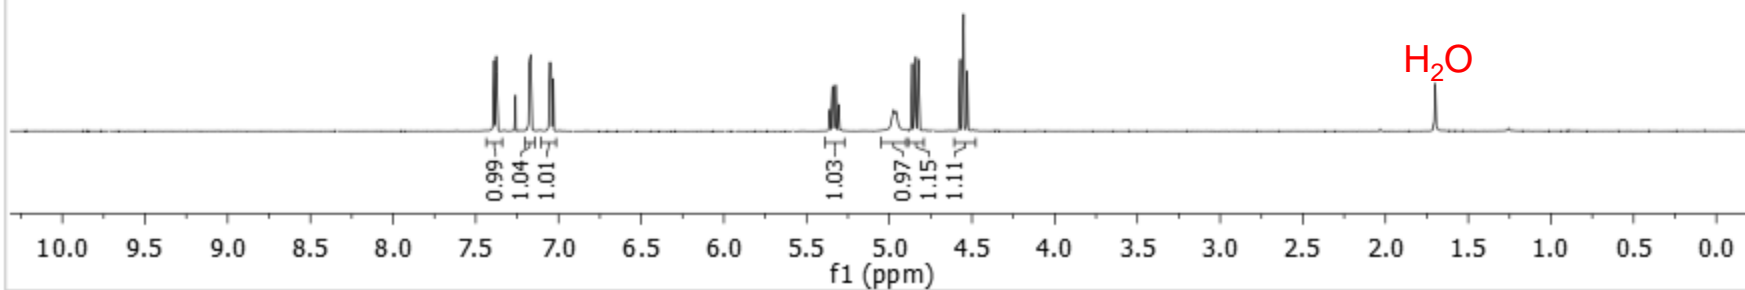

CDCl<sub>3</sub>

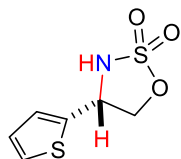

<sup>13</sup>C NMR of **2k**, 100 MHz, CDCl<sub>3</sub>

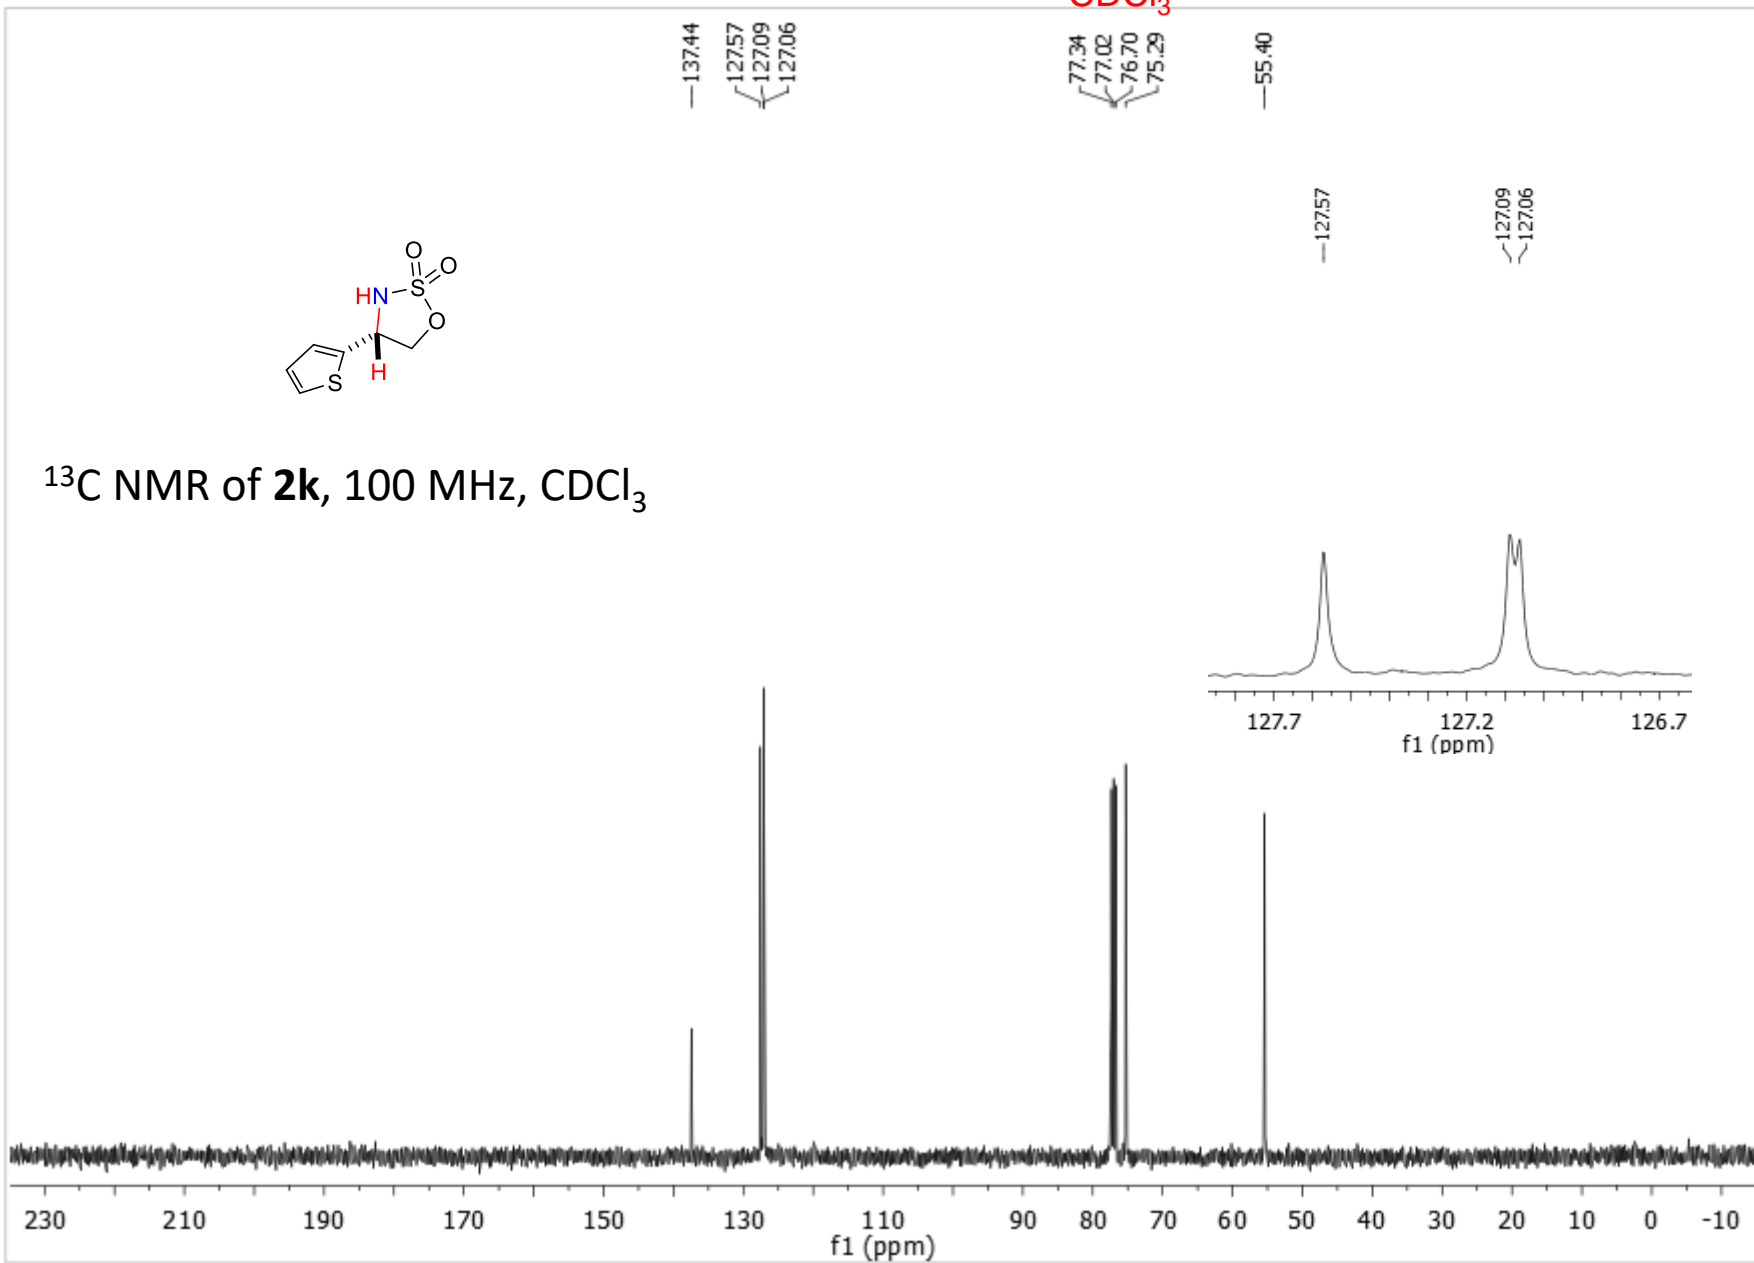

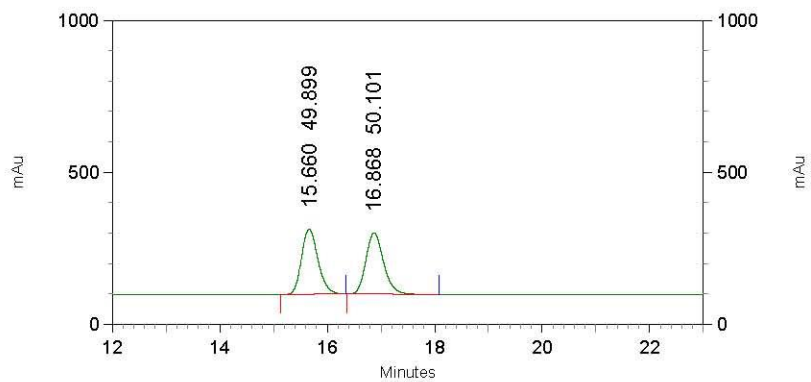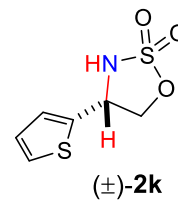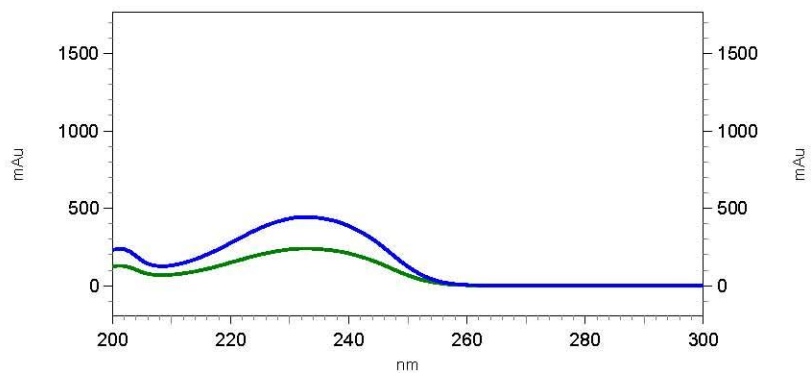

19: 239 nm, 4 nm  
Results

| Pk #   | Name | Retention Time | Area Percent |
|--------|------|----------------|--------------|
| 1      |      | 15.660         | 49.899       |
| 2      |      | 16.868         | 50.101       |
| Totals |      |                | 100.000      |



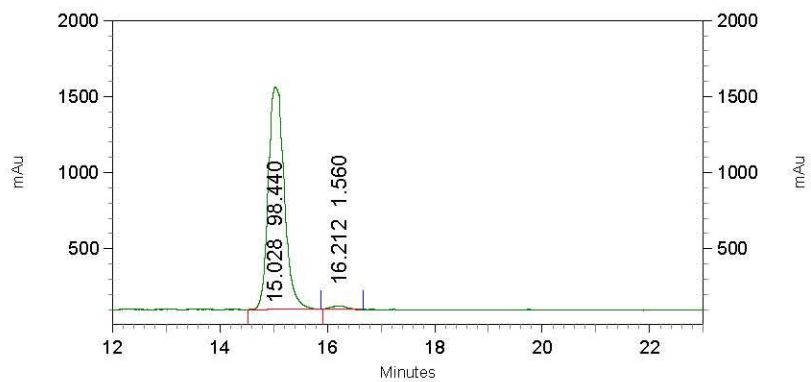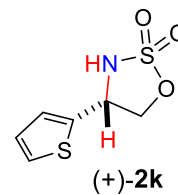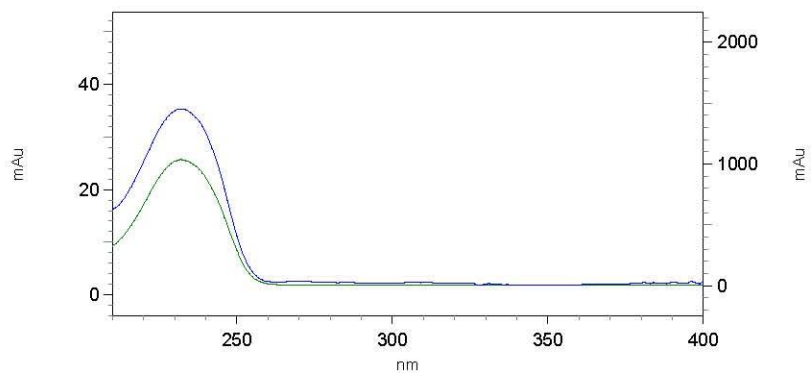

8: 193 nm, 4 nm  
Results

| Name | Retention Time | Area Percent | Pk # |
|------|----------------|--------------|------|
|      | 15.028         | 98.440       | 1    |
|      | 16.212         | 1.560        | 2    |

|        |  |         |  |
|--------|--|---------|--|
| Totals |  | 100.000 |  |
|--------|--|---------|--|

$\text{CHCl}_3$

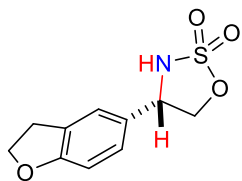

$^1\text{H}$  NMR of **2I**, 600 MHz,  $\text{CDCl}_3$

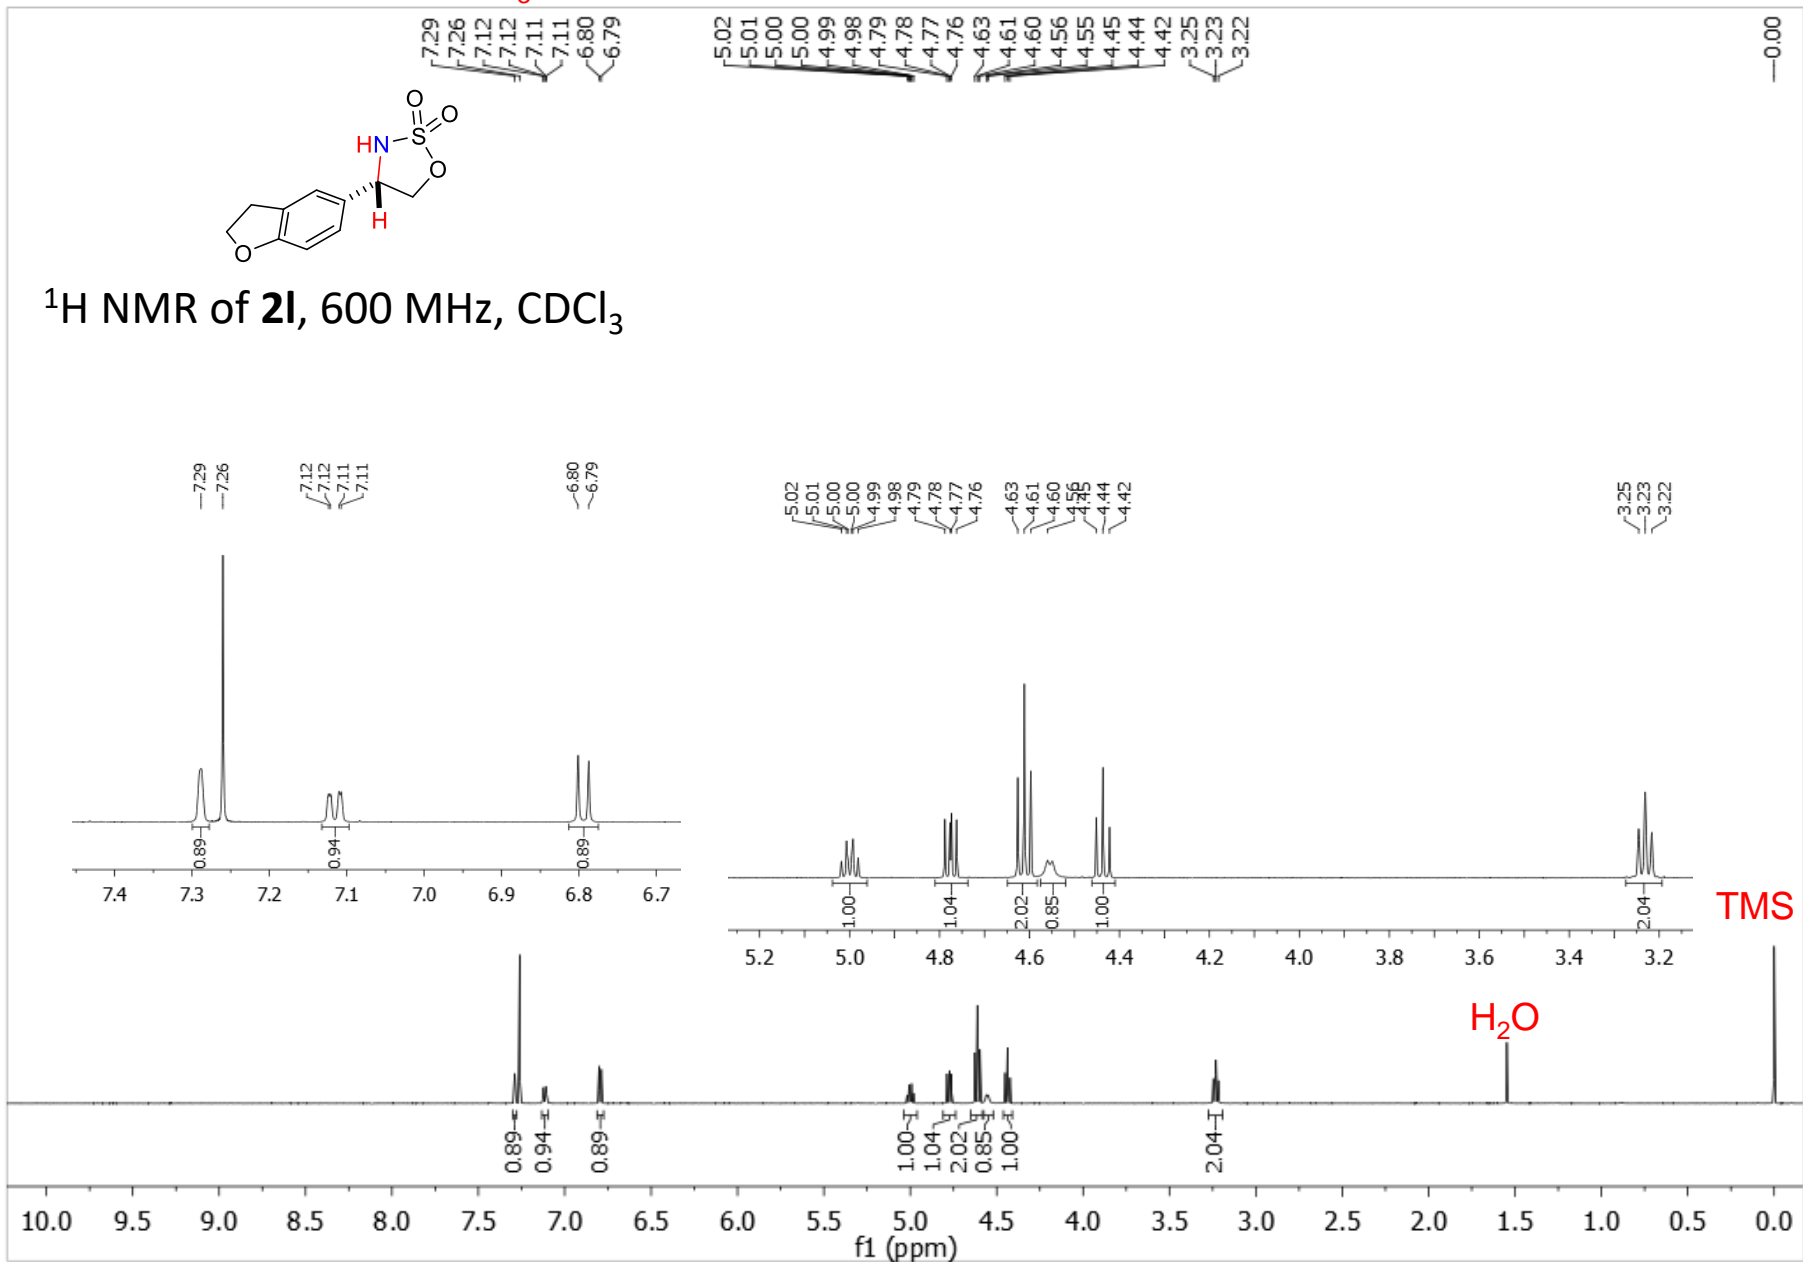

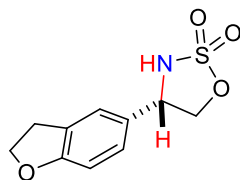

<sup>13</sup>C NMR of **2I**, 150 MHz, CDCl<sub>3</sub>

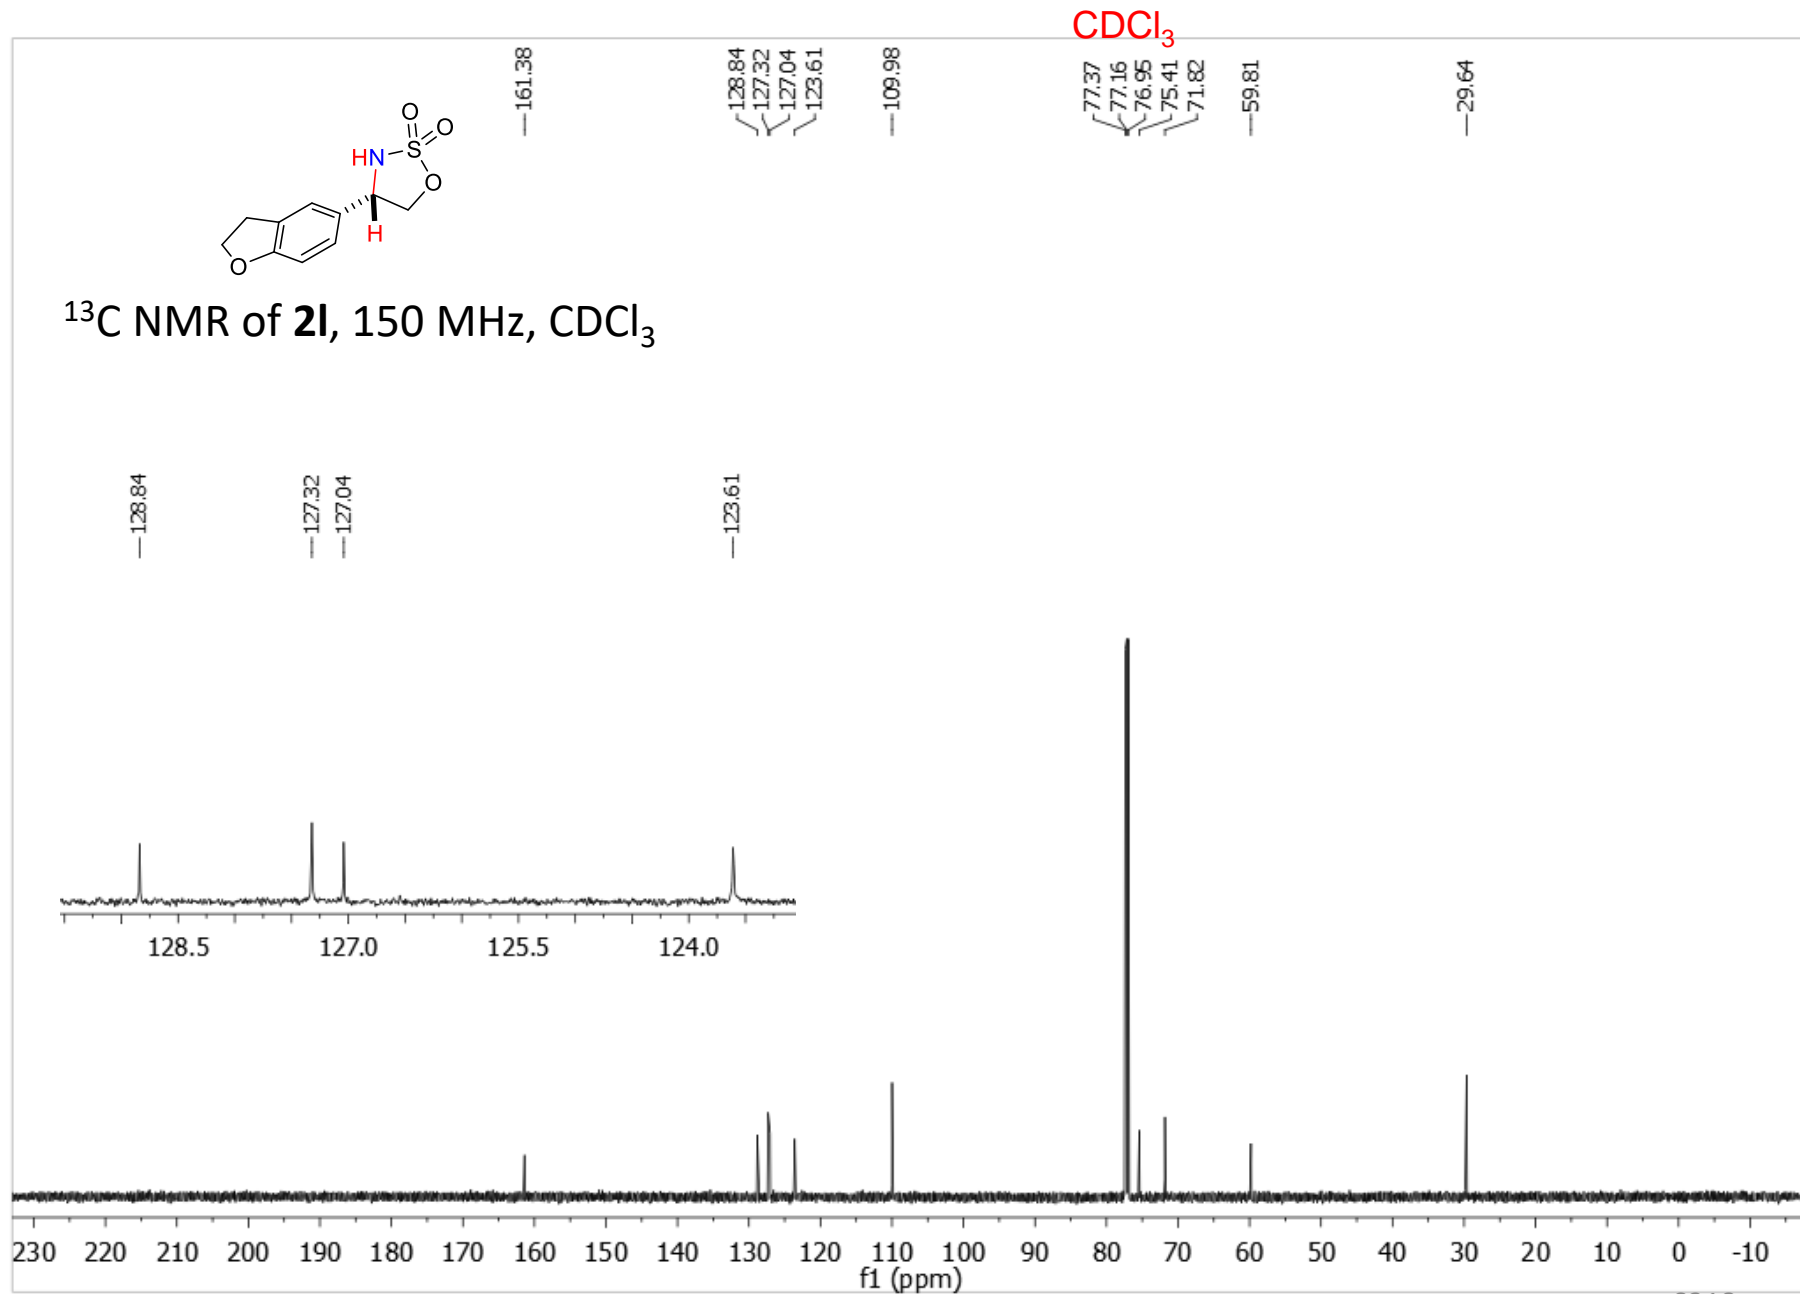

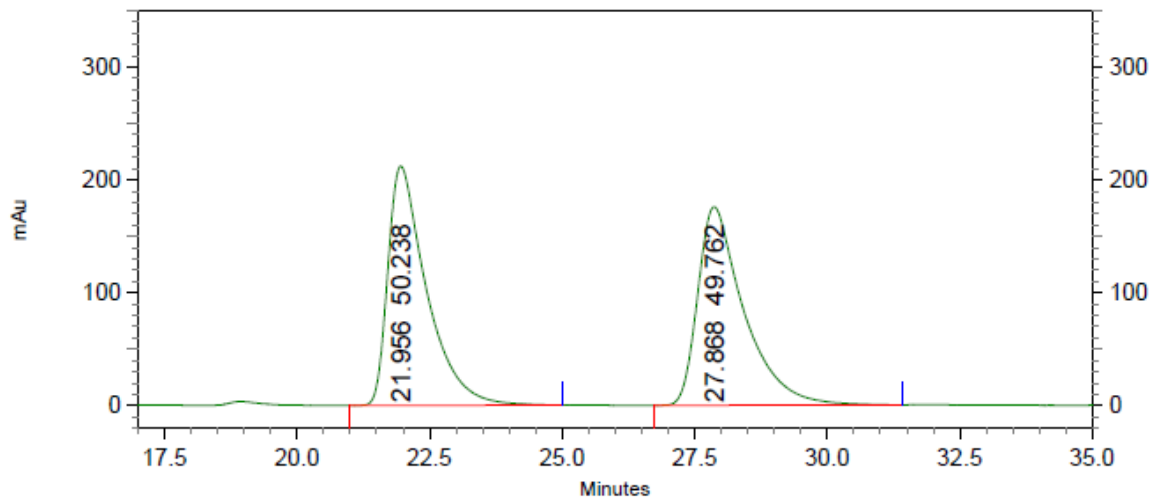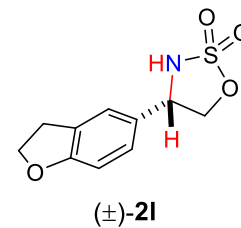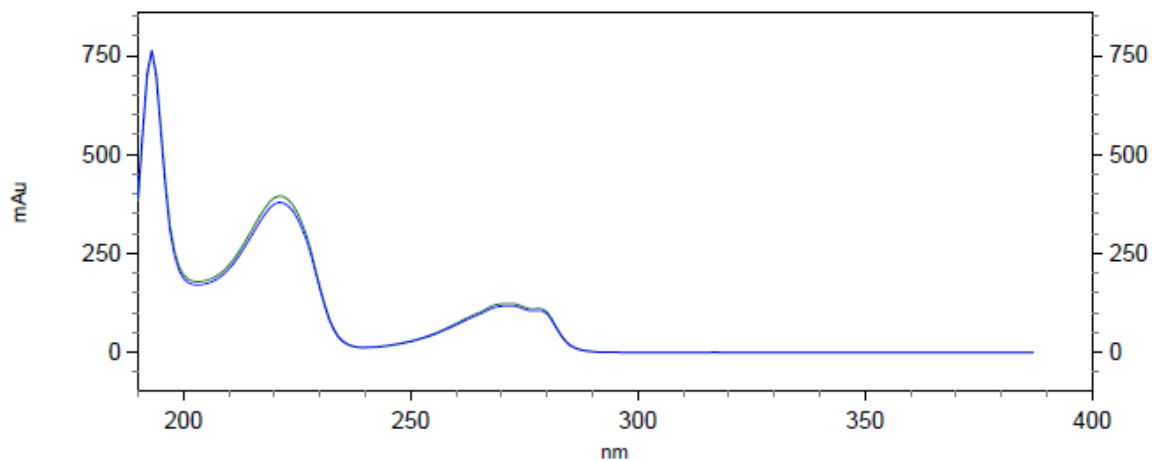

4: 237 nm, 4  
nm Results

| Pk # | Retention Time | Area Percent |
|------|----------------|--------------|
| 1    | 21.956         | 50.238       |
| 2    | 27.868         | 49.762       |

|        |         |
|--------|---------|
| Totals | 100.000 |
|--------|---------|

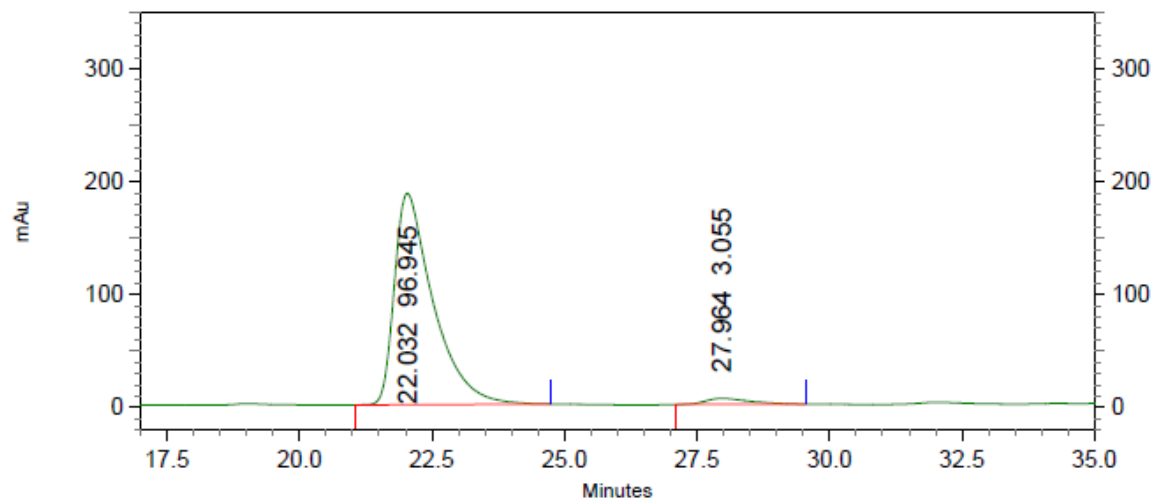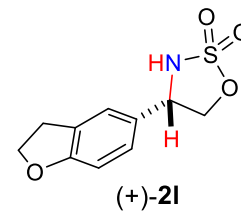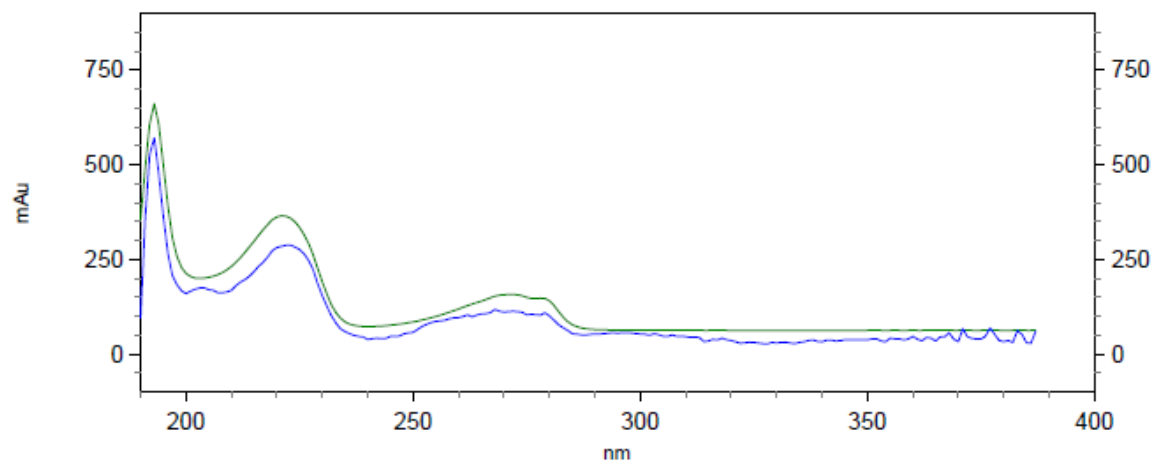

4: 237 nm, 4  
nm Results

| Pk # | Retention Time | Area Percent |
|------|----------------|--------------|
| 1    | 22.032         | 96.945       |
| 2    | 27.964         | 3.055        |

|        |         |
|--------|---------|
| Totals | 100.000 |
|--------|---------|

## checkCIF/PLATON report

Structure factors have been supplied for datablock(s) C10H11NO4S

THIS REPORT IS FOR GUIDANCE ONLY. IF USED AS PART OF A REVIEW PROCEDURE FOR PUBLICATION, IT SHOULD NOT REPLACE THE EXPERTISE OF AN EXPERIENCED CRYSTALLOGRAPHIC REFEREE.

No syntax errors found. CIF dictionary Interpreting this report

### Datablock: C10H11NO4S

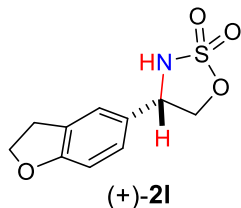

Bond precision: C-C = 0.0044 A Wavelength=1.54178  
Cell: a=7.6416(7) b=6.1950(5) c=10.8388(9)  
alpha=90 beta=91.217(5) gamma=90  
Temperature: 123 K

|                | Calculated     | Reported       |
|----------------|----------------|----------------|
| Volume         | 512.99(8)      | 512.99(8)      |
| Space group    | P 21           | P 21           |
| Hall group     | P 2yb          | P 2yb          |
| Moiety formula | C10 H11 N O4 S | C10 H11 N O4 S |
| Sum formula    | C10 H11 N O4 S | C10 H11 N O4 S |
| Mr             | 241.26         | 241.26         |
| Dx, g cm-3     | 1.562          | 1.562          |
| Z              | 2              | 2              |
| Mu (mm-1)      | 2.832          | 2.832          |
| F000           | 252.0          | 252.0          |
| F000'          | 253.46         |                |
| h, k, lmax     | 9, 7, 12       | 8, 7, 12       |
| Nref           | 1807[ 995]     | 1777           |
| Tmin, Tmax     | 0.434, 0.844   | 0.580, 0.753   |
| Tmin'          | 0.325          |                |

Correction method= # Reported T Limits: Tmin=0.580 Tmax=0.753  
AbsCorr = MULTI-SCAN

Data completeness= 1.79/0.98 Theta(max)= 66.411

R(reflections)= 0.0323( 1740) wR2(reflections)= 0.0845( 1777)

S = 1.036 Npar= 149

The following ALERTS were generated. Each ALERT has the format  
**test-name\_ALERT\_alert-type\_alert-level.**  
Click on the hyperlinks for more details of the test.

| Alert level C     |                                               |             |
|-------------------|-----------------------------------------------|-------------|
| PLAT089_ALERT_3_C | Poor Data / Parameter Ratio (Zmax < 18) ..... | 6.64 Note   |
| PLAT340_ALERT_3_C | Low Bond Precision on C-C Bonds .....         | 0.0044 Ang. |
| PLAT911_ALERT_3_C | Missing FCF Refl Between Thmin & STh/L= 0.594 | 2 Report    |

| Alert level G     |                                                  |              |
|-------------------|--------------------------------------------------|--------------|
| PLAT002_ALERT_2_G | Number of Distance or Angle Restraints on AtSite | 2 Note       |
| PLAT172_ALERT_4_G | The CIF-Embedded .res File Contains DFIX Records | 1 Report     |
| PLAT395_ALERT_2_G | Deviating X-O-Y Angle From 120 for O1            | 109.8 Degree |
| PLAT398_ALERT_2_G | Deviating C-O-C Angle From 120 for O4            | 106.7 Degree |
| PLAT791_ALERT_4_G | Model has Chirality at C2 (Chiral SPGR)          | 5 Verify     |
| PLAT860_ALERT_3_G | Number of Least-Squares Restraints .....         | 2 Note       |
| PLAT909_ALERT_3_G | Percentage of I>2sig(I) Data at Theta(Max) Still | 94% Note     |
| PLAT933_ALERT_2_G | Number of OMIT Records in Embedded .res File ... | 1 Note       |
| PLAT978_ALERT_2_G | Number C-C Bonds with Positive Residual Density. | 7 Info       |

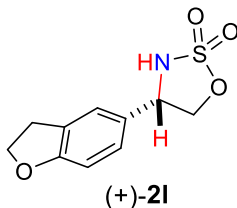

- 
- 0 ALERT level A = Most likely a serious problem - resolve or explain
  - 0 ALERT level B = A potentially serious problem, consider carefully
  - 3 ALERT level C = Check. Ensure it is not caused by an omission or oversight
  - 9 ALERT level G = General information/check it is not something unexpected
- 
- 0 ALERT type 1 CIF construction/syntax error, inconsistent or missing data
  - 5 ALERT type 2 Indicator that the structure model may be wrong or deficient
  - 5 ALERT type 3 Indicator that the structure quality may be low
  - 2 ALERT type 4 Improvement, methodology, query or suggestion
  - 0 ALERT type 5 Informative message, check
- 

It is advisable to attempt to resolve as many as possible of the alerts in all categories. Often the minor alerts point to easily fixed oversights, errors and omissions in your CIF or refinement strategy, so attention to these fine details can be worthwhile. In order to resolve some of the more serious problems it may be necessary to carry out additional measurements or structure refinements. However, the purpose of your study may justify the reported deviations and the more serious of these should normally be commented upon in the discussion or experimental section of a paper or in the "special\_details" fields of the CIF. checkCIF was carefully designed to identify outliers and unusual parameters, but every test has its limitations and alerts that are not important in a particular case may appear. Conversely, the absence of alerts does not guarantee there are no aspects of the results needing attention. It is up to the individual to critically assess their own results and, if necessary, seek expert advice.

#### Publication of your CIF in IUCr journals

A basic structural check has been run on your CIF. These basic checks will be run on all CIFs submitted for publication in IUCr journals (*Acta Crystallographica*, *Journal of Applied Crystallography*, *Journal of Synchrotron Radiation*); however, if you intend to submit to *Acta Crystallographica Section C* or *E* or *IUCrData*, you should make sure that full publication checks are run on the final version of your CIF prior to submission.

#### Publication of your CIF in other journals

Please refer to the *Notes for Authors* of the relevant journal for any special instructions relating to CIF submission.

PLATON version of 17/03/2019; check.def file version of 04/03/2019

Datablock C10H11NO4S - ellipsoid plot

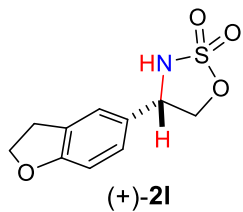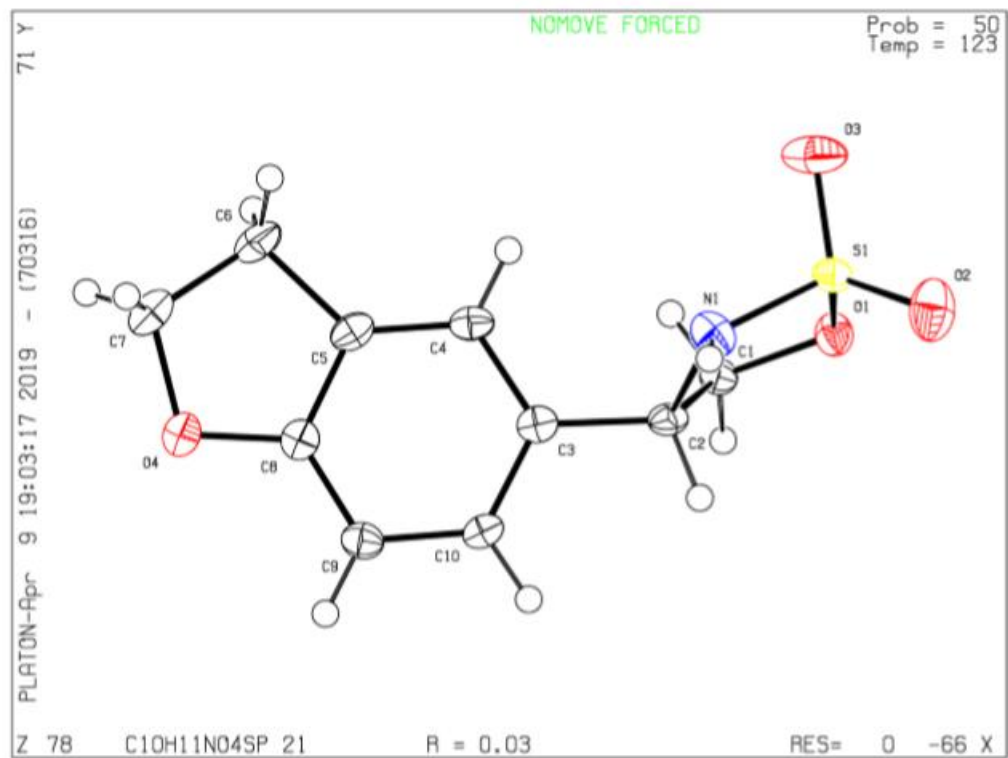



CHCl<sub>3</sub>

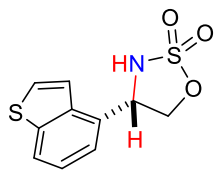

<sup>1</sup>H NMR of **2m**, 600 MHz, CDCl<sub>3</sub>

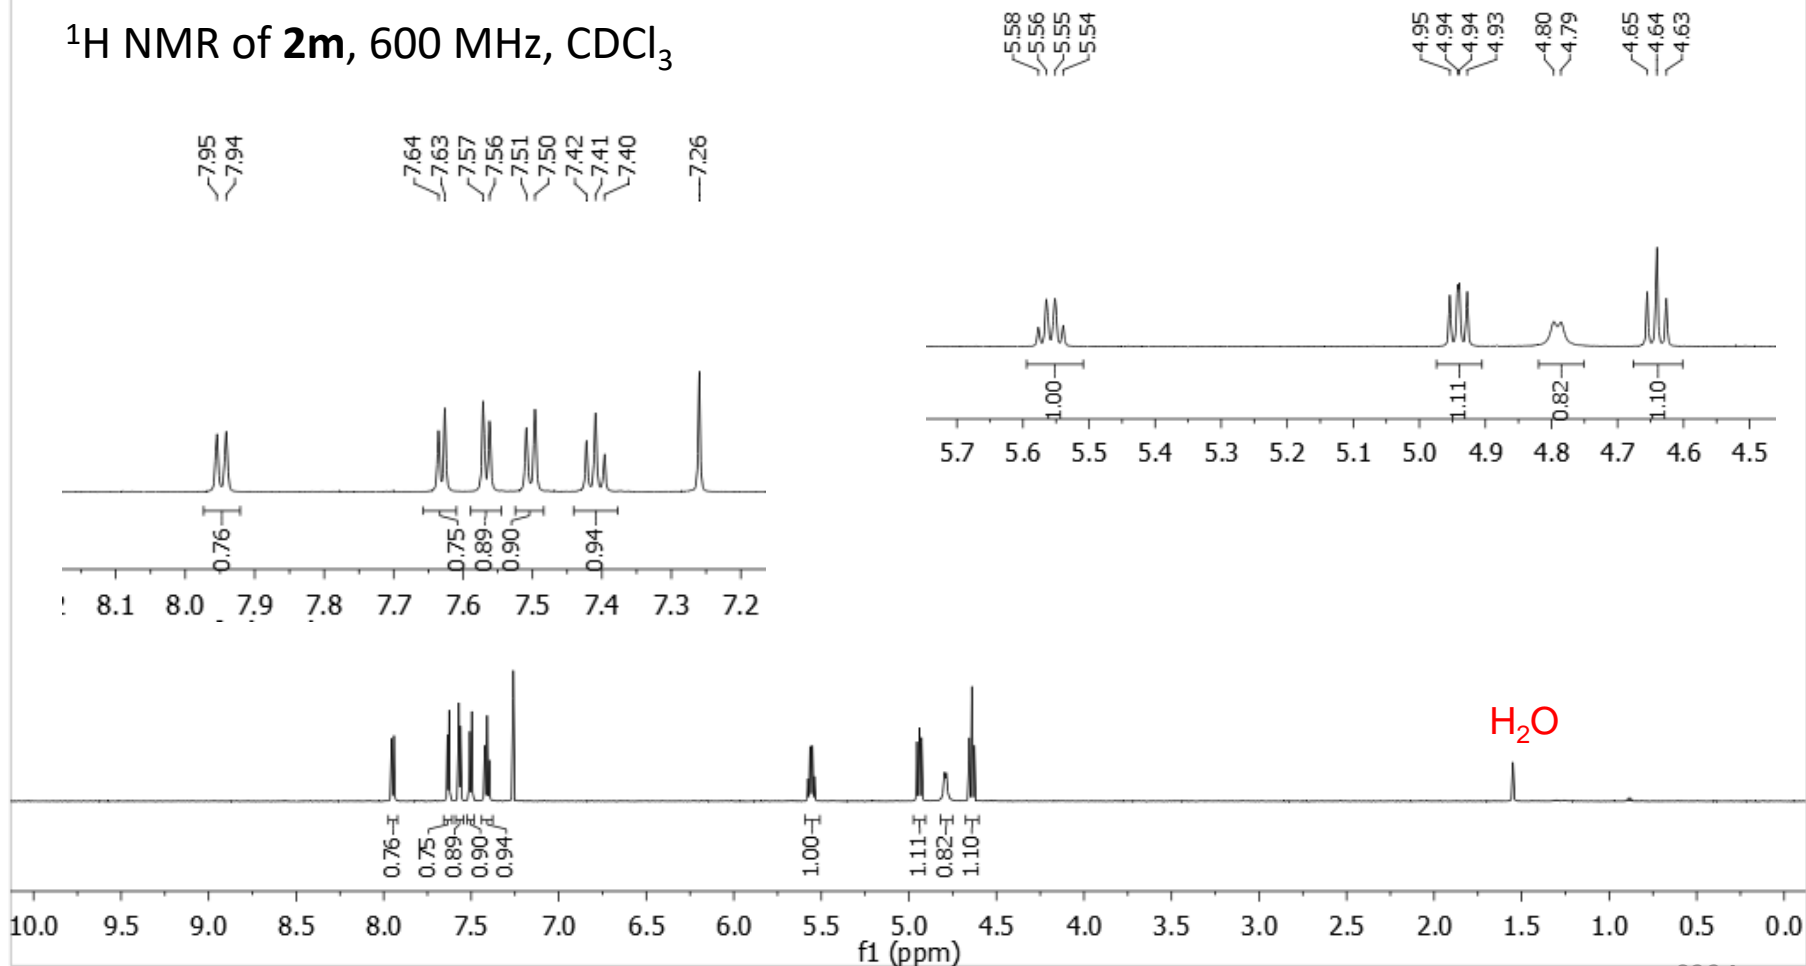

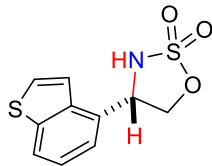

CDCl<sub>3</sub>

<sup>13</sup>C NMR of **2m**, 150 MHz, CDCl<sub>3</sub>

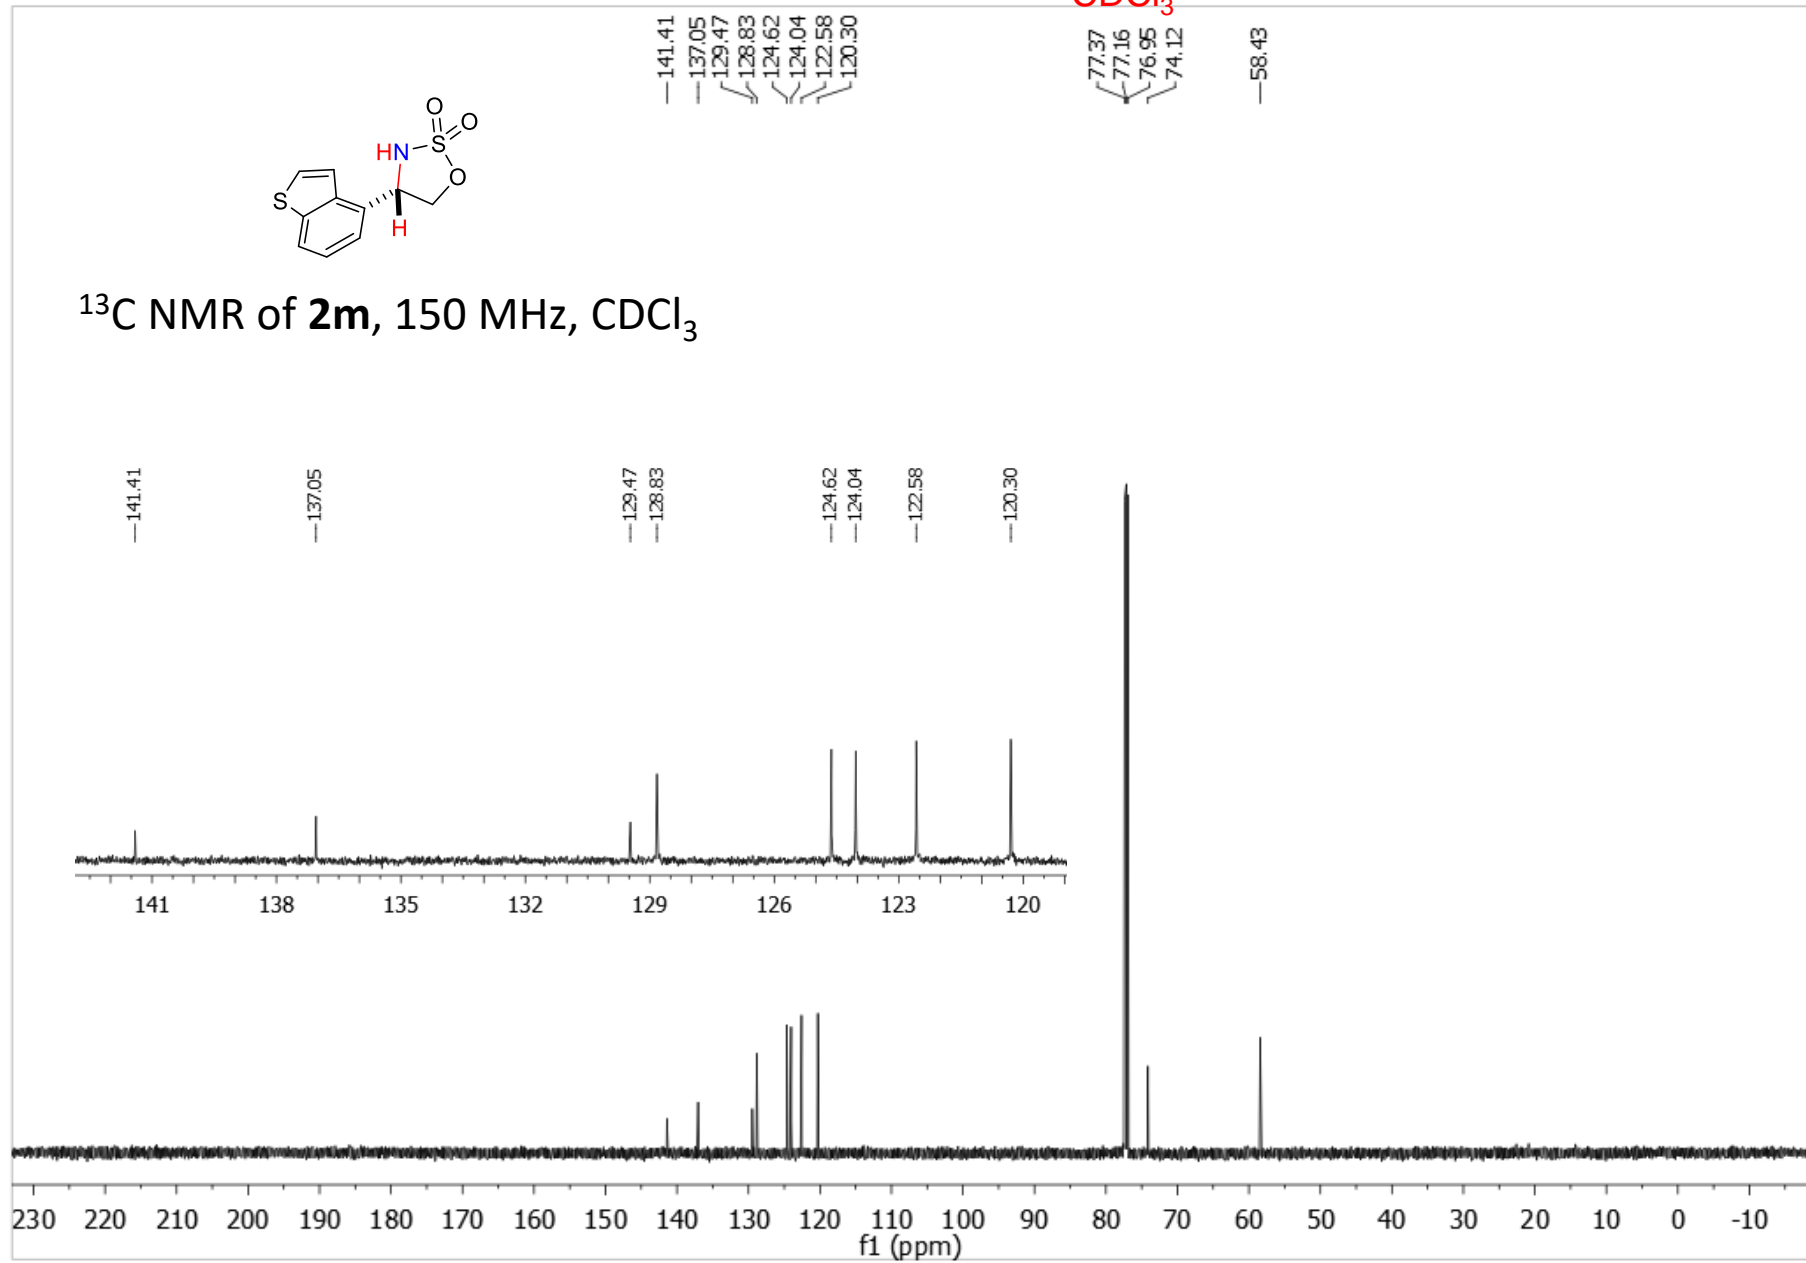

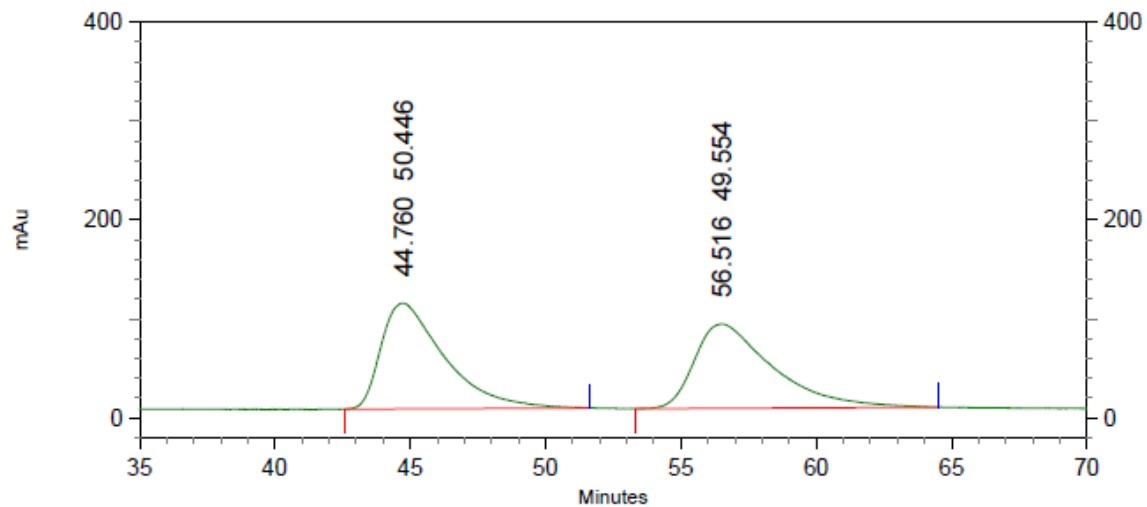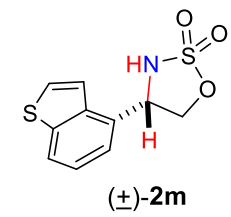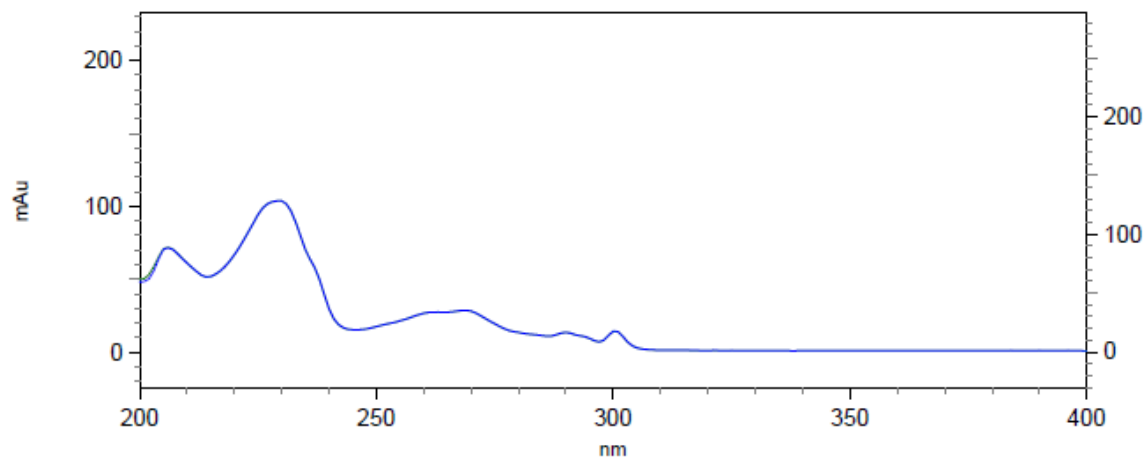

4: 245 nm, 4  
nm Results

| Pk #   | Retention Time | Area Percent |
|--------|----------------|--------------|
| 1      | 44.760         | 50.446       |
| 2      | 56.516         | 49.554       |
| Totals |                | 100.000      |

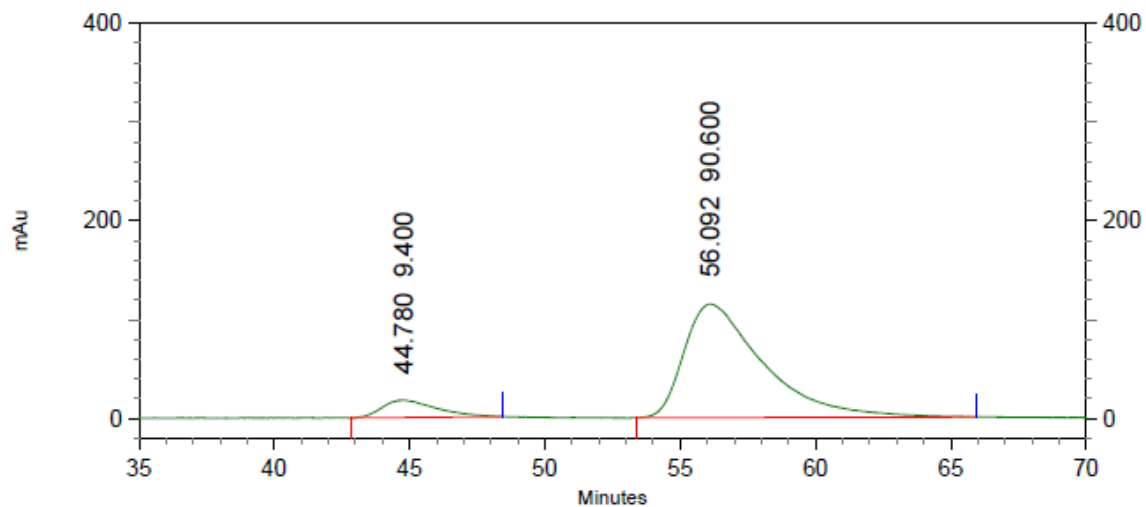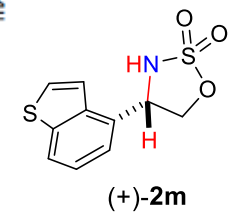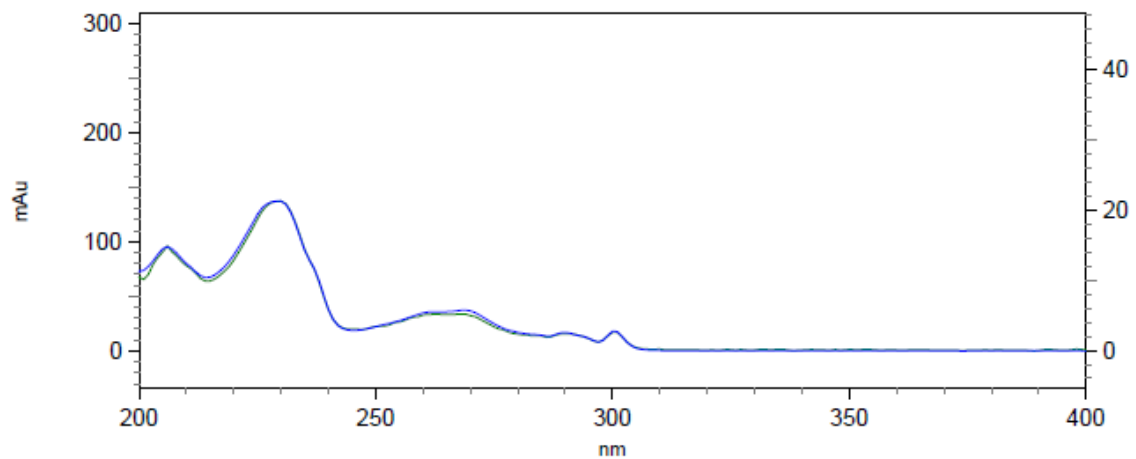

4: 245 nm, 4  
nm Results

| Pk #   | Retention Time | Area Percent |
|--------|----------------|--------------|
| 1      | 44.780         | 9.400        |
| 2      | 56.092         | 90.600       |
| Totals |                | 100.000      |

CHCl<sub>3</sub>

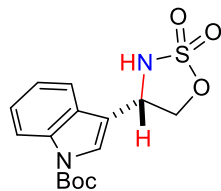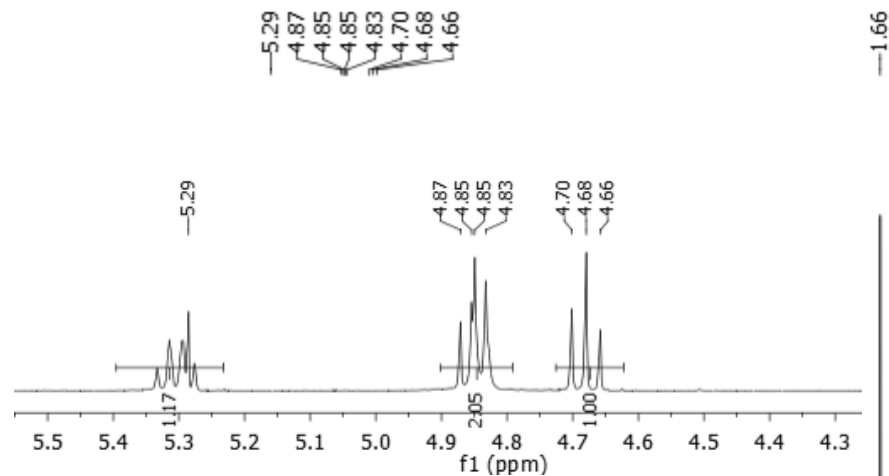

<sup>1</sup>H NMR of **2n**, 400 MHz, CDCl<sub>3</sub>

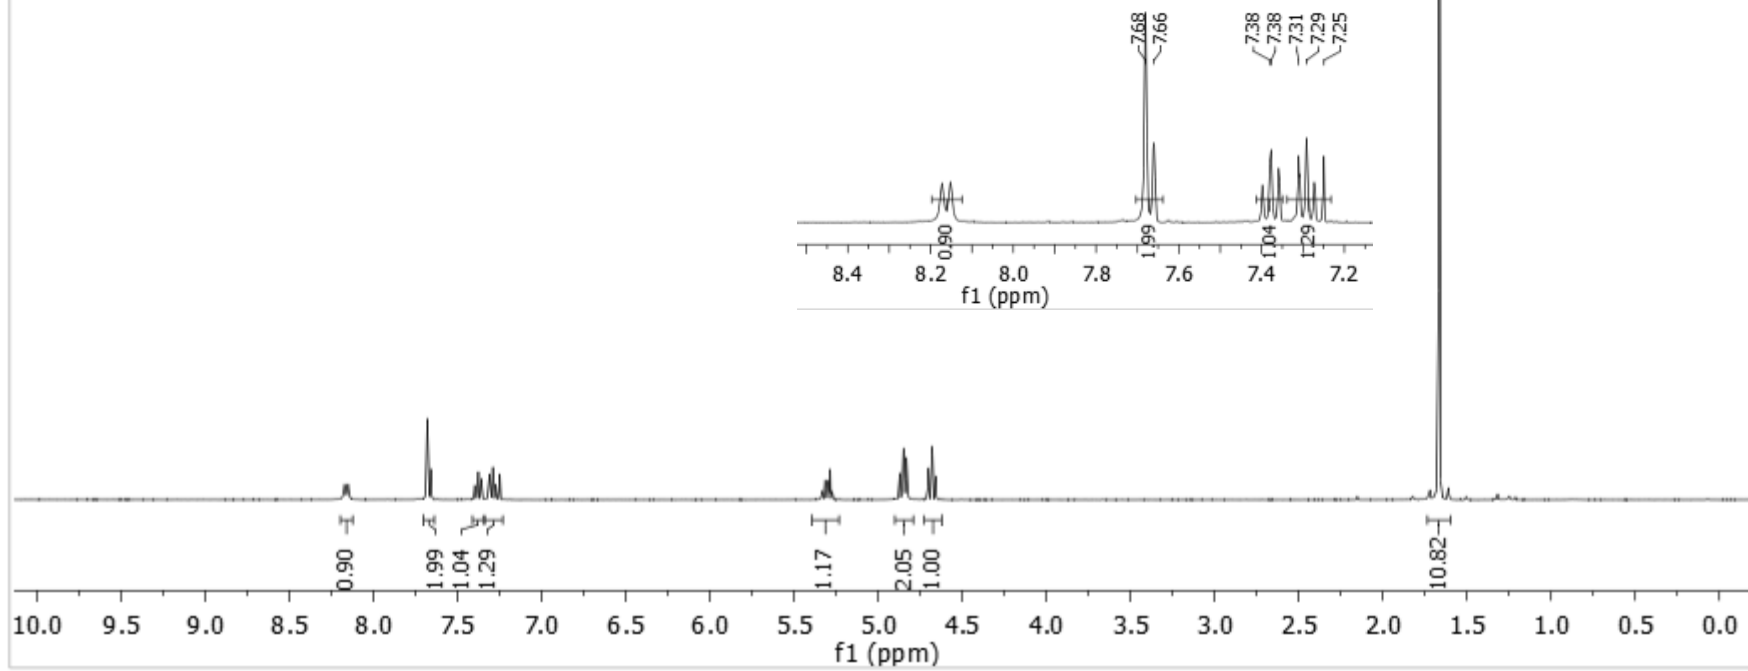

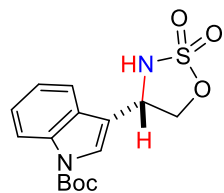

$^{13}\text{C}$  NMR of **2n**, 100 MHz,  $\text{CDCl}_3$

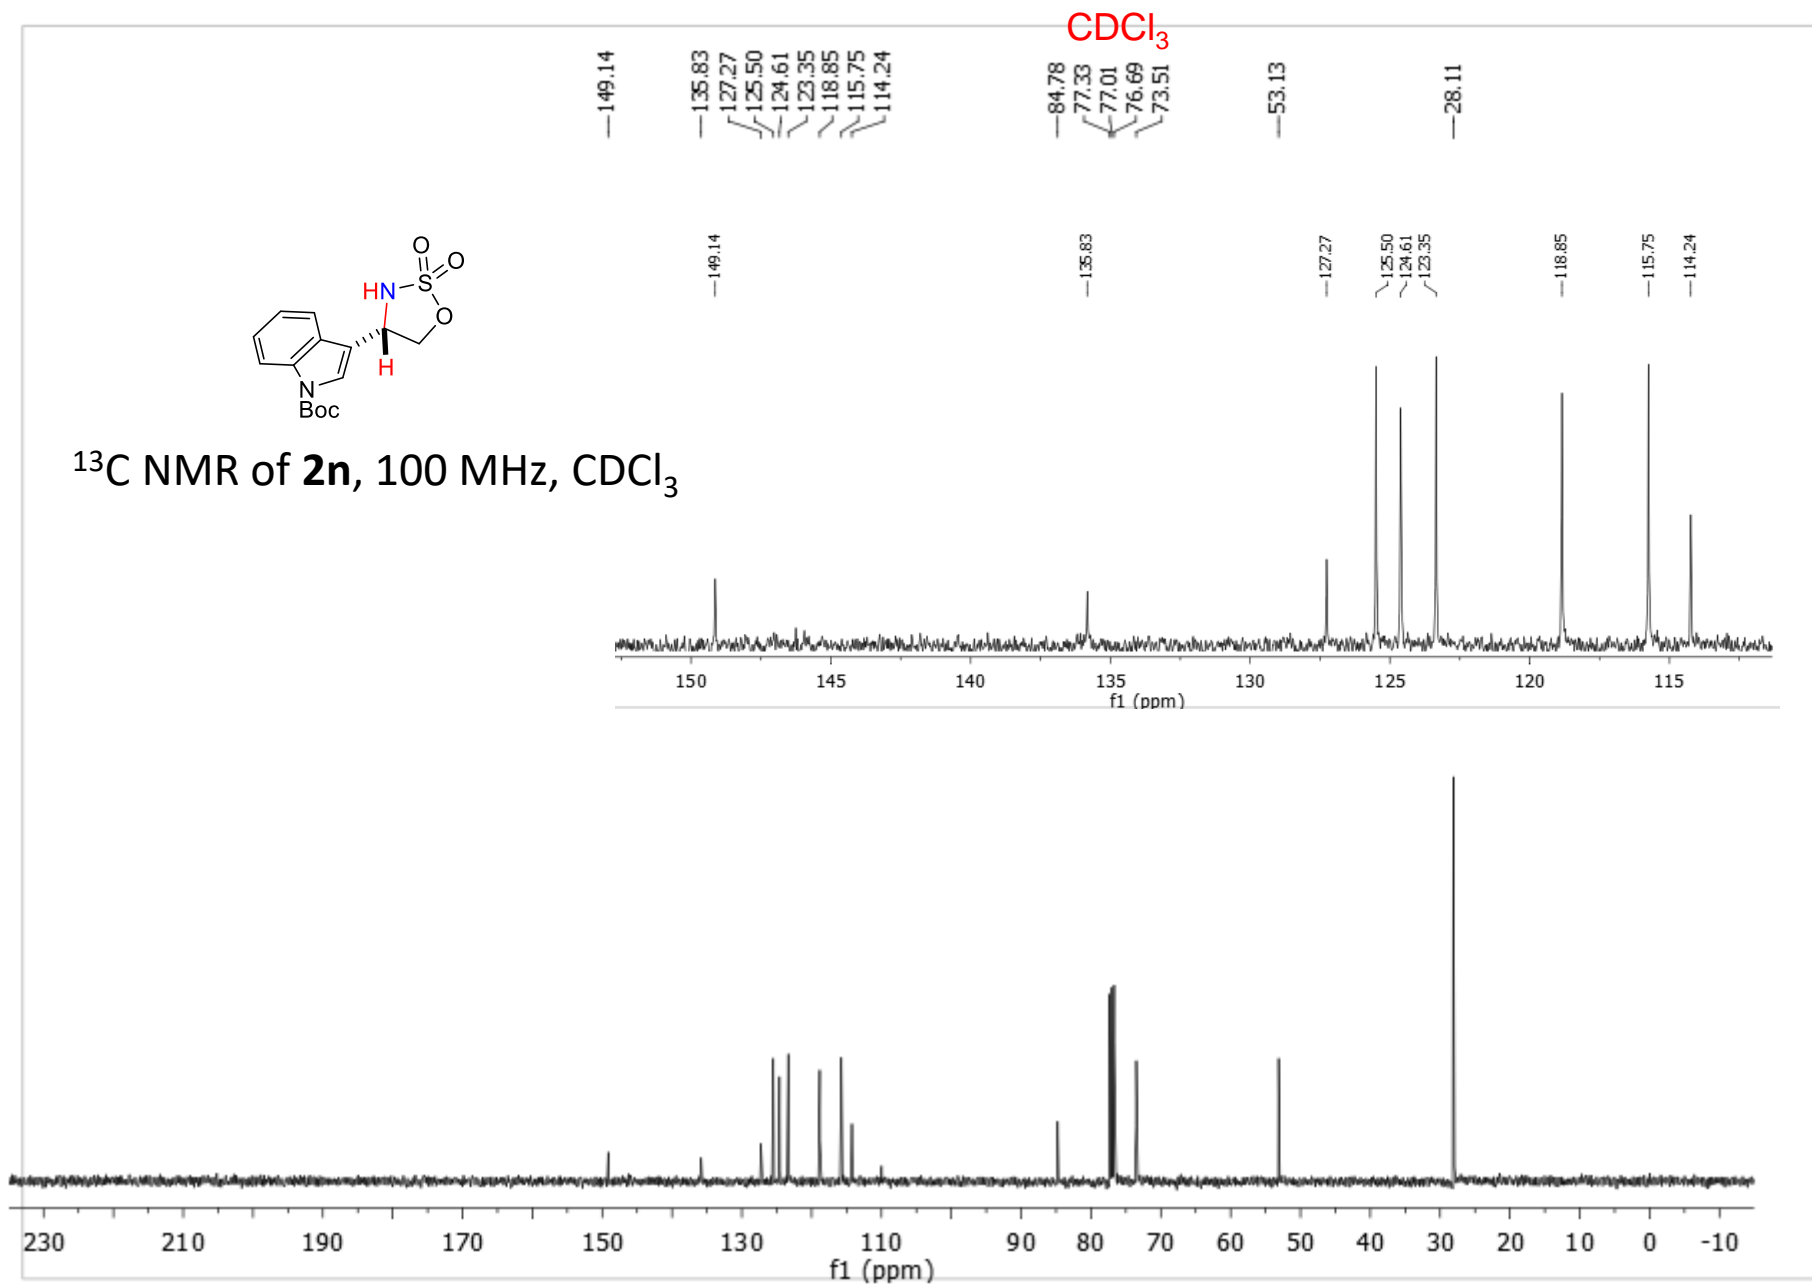

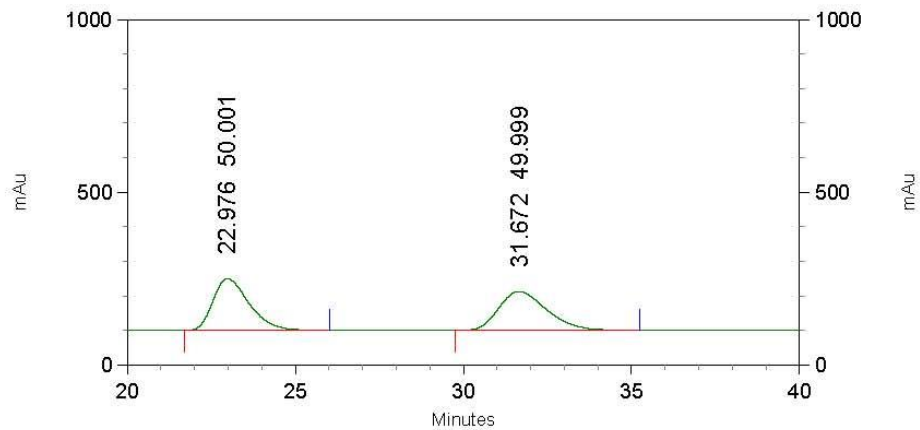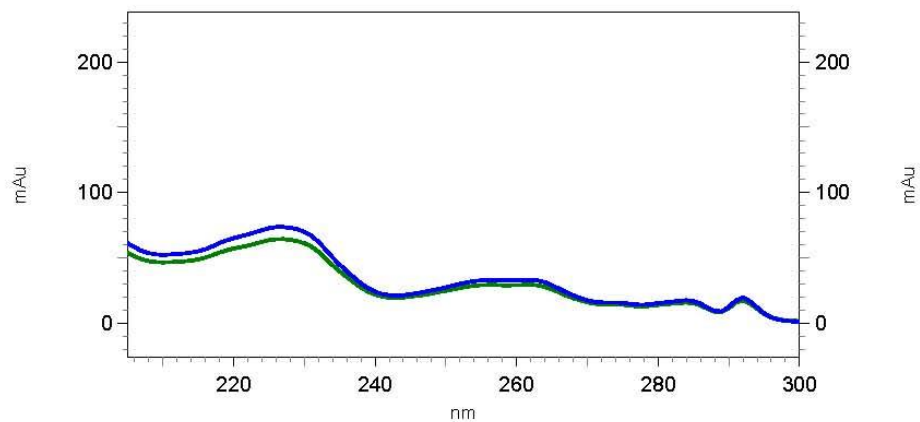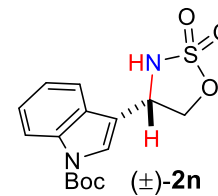

15: 224 nm, 4 nm  
Results

| Pk # | Name | Retention Time | Area Percent |
|------|------|----------------|--------------|
| 1    |      | 22.976         | 50.001       |
| 2    |      | 31.672         | 49.999       |

|        |  |  |         |
|--------|--|--|---------|
| Totals |  |  | 100.000 |
|--------|--|--|---------|

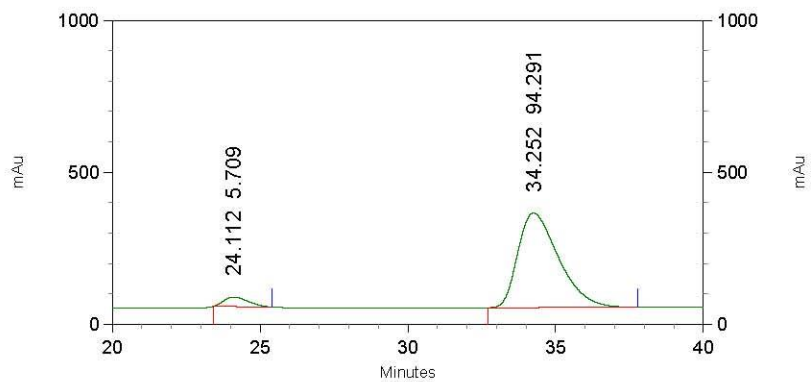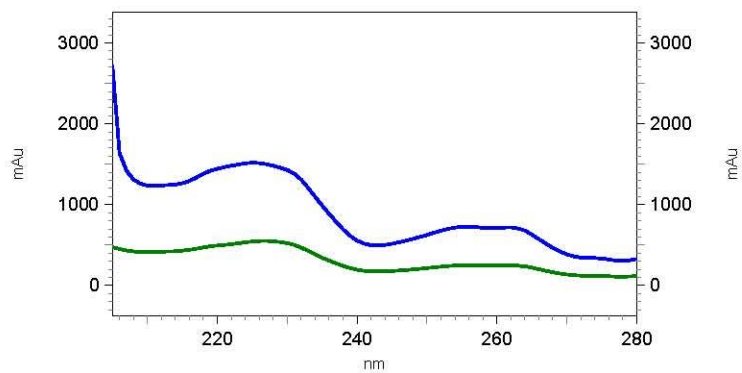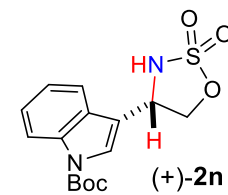

9: 277 nm, 4 nm  
Results

| Pk #   | Name | Retention Time | Area Percent |
|--------|------|----------------|--------------|
| 1      |      | 24.112         | 5.709        |
| 2      |      | 34.252         | 94.291       |
| Totals |      |                | 100.000      |



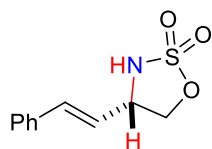

$^1\text{H}$  NMR of **2o**, 600 MHz, Acetone- $D_6$

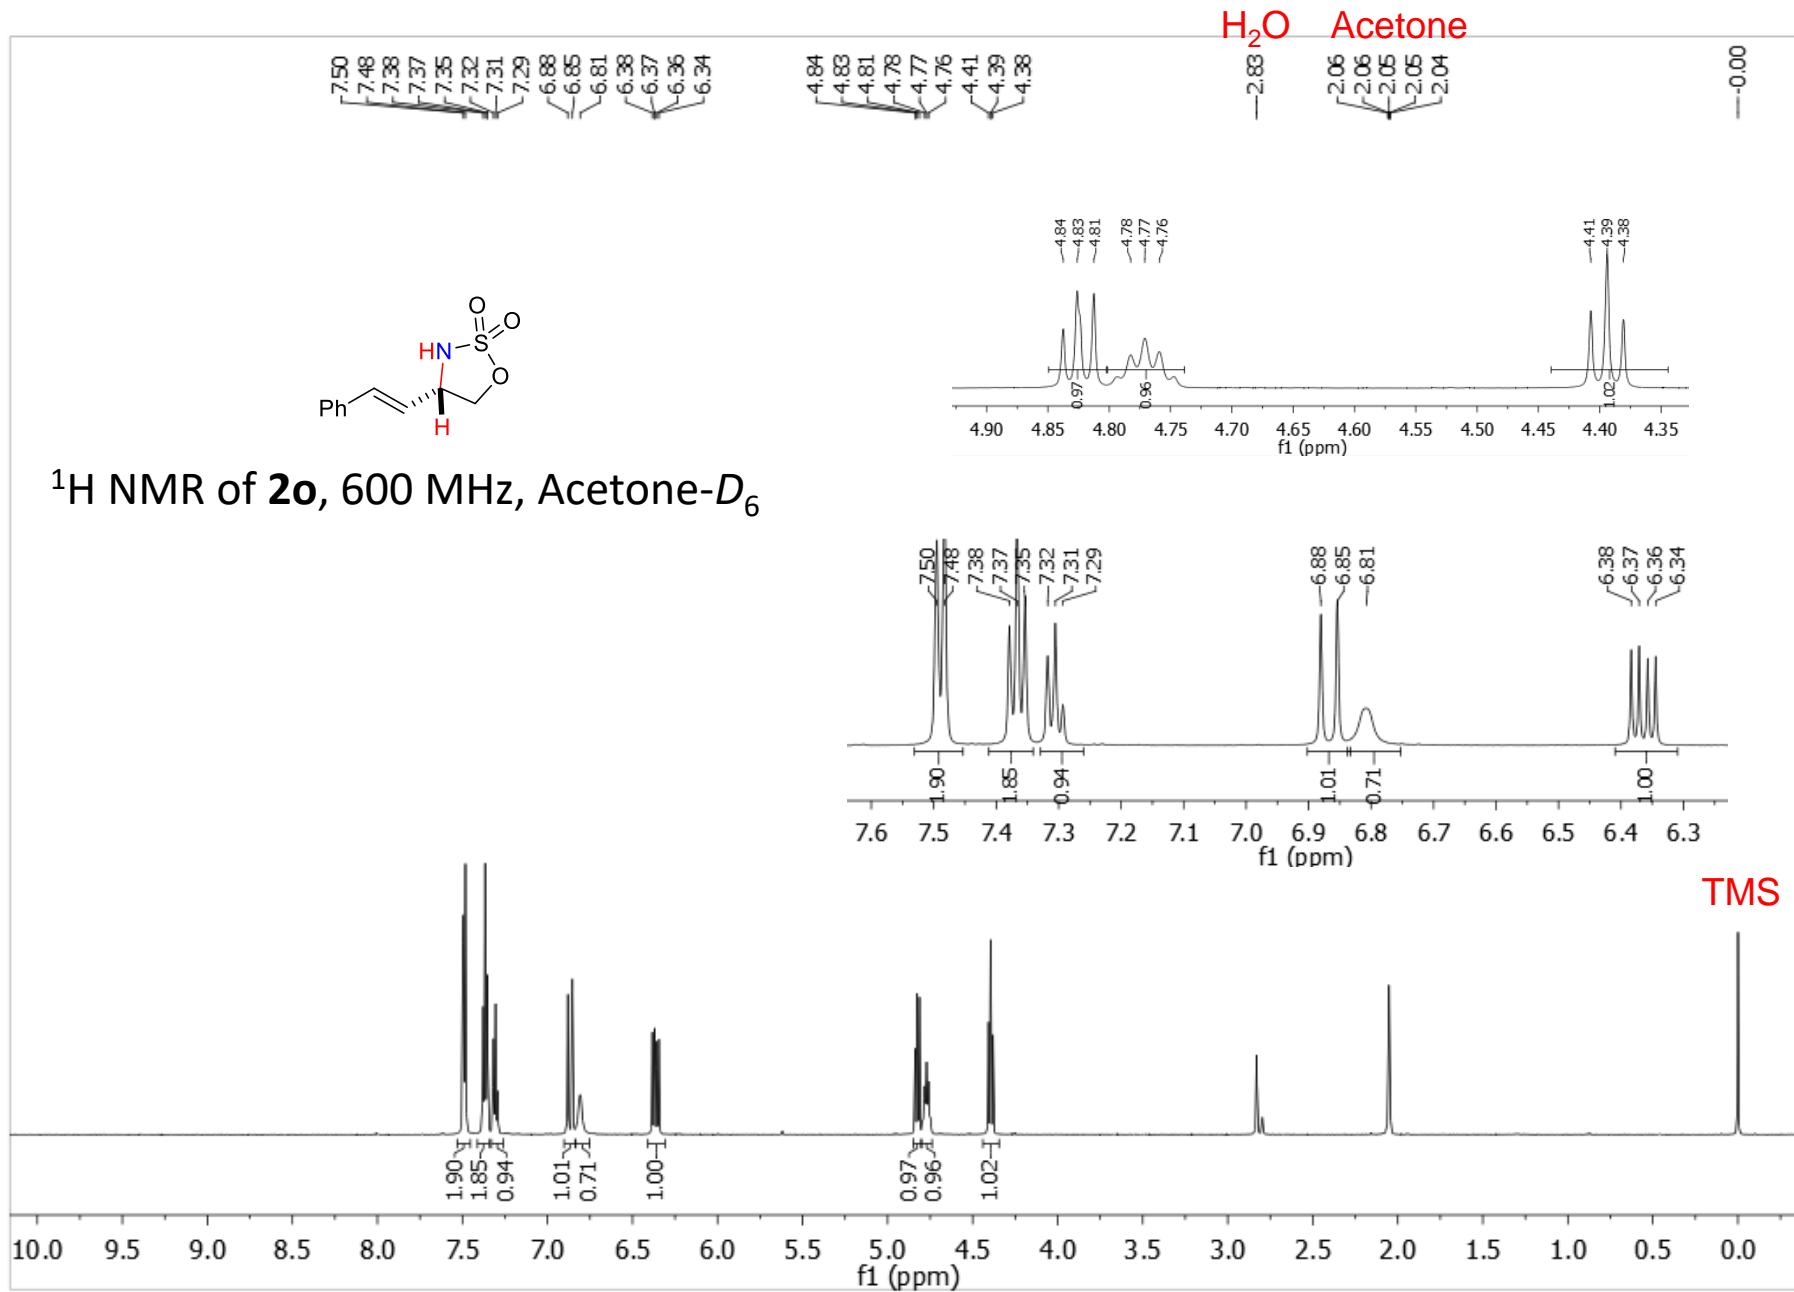

Acetone- $D_6$

Acetone- $D_6$

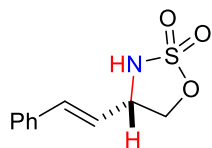

$^{13}\text{C}$  NMR of **2o**, 150 MHz, Acetone- $D_6$

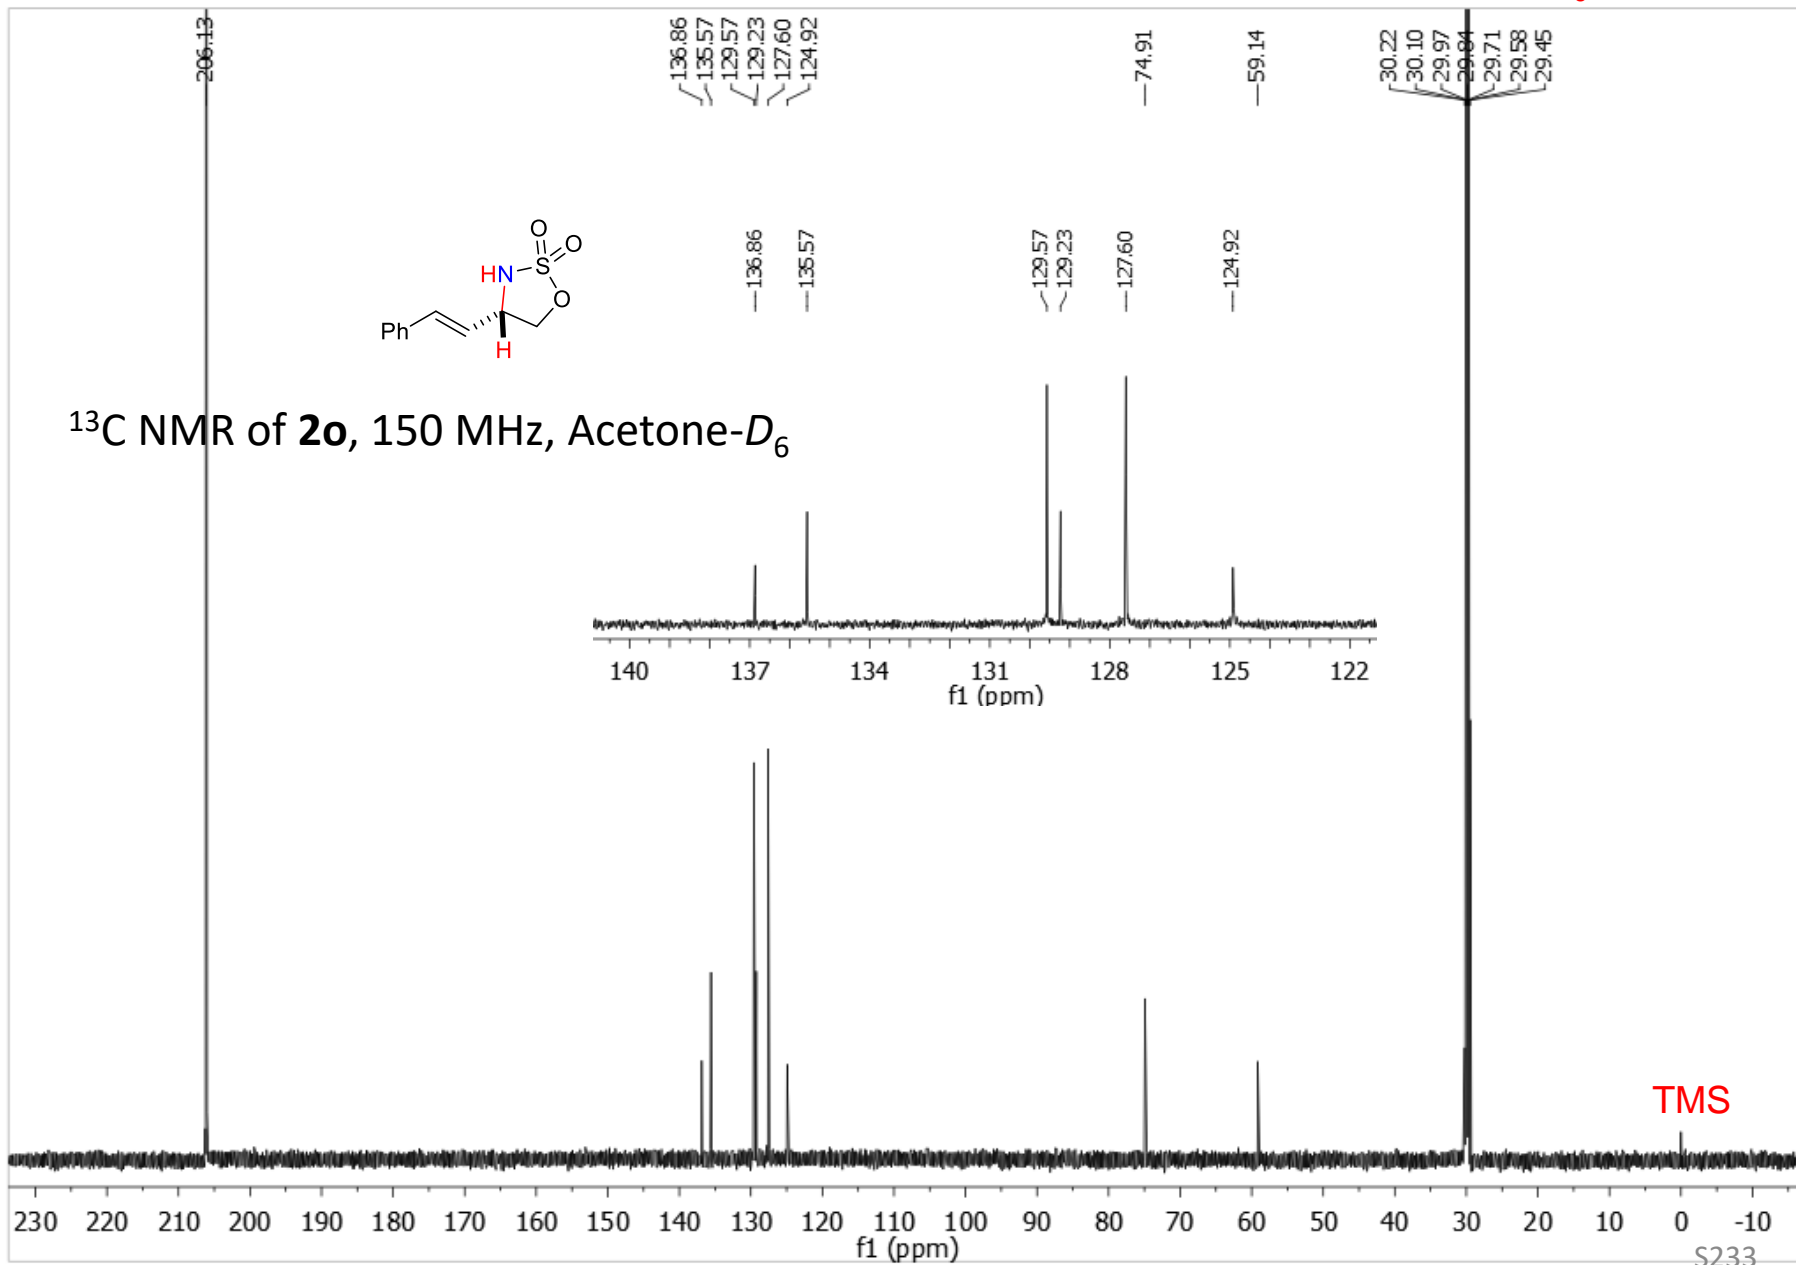

C:\EZStart\Projects\Default\Data\K0L-365-ADH-7%  
 C:\Documents and Settings\zhang\Desktop\DSW\0210.met

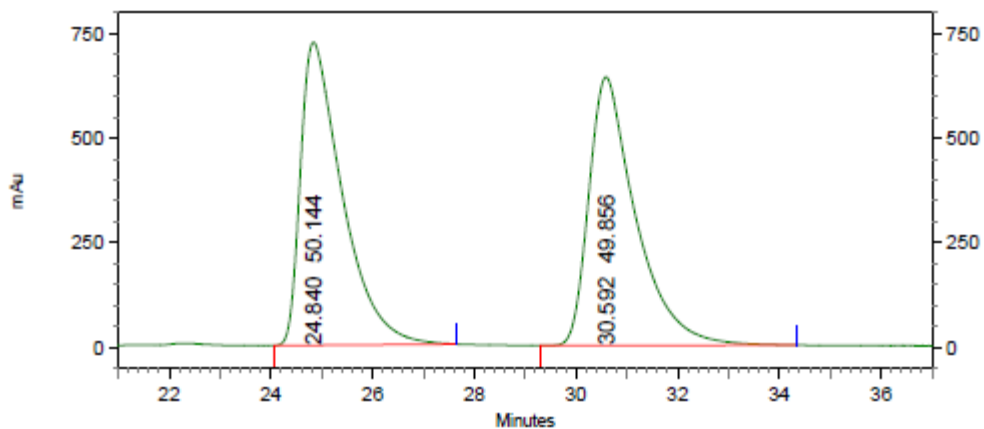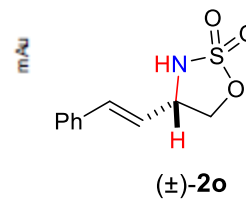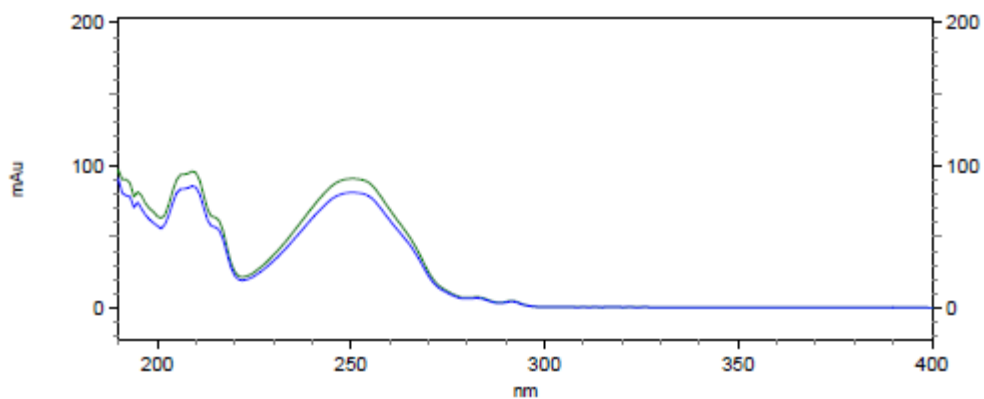

4: 250 nm, 4  
 nm Results

| Pk # | Retention Time | Area Percent |
|------|----------------|--------------|
| 1    | 24.840         | 50.144       |
| 2    | 30.592         | 49.856       |

|        |         |
|--------|---------|
| Totals | 100.000 |
|--------|---------|

C:\EZStart\Projects\Default\Data\K0L-364-ADH-7%  
C:\Documents and Settings\zhang\Desktop\DSW\0210.met

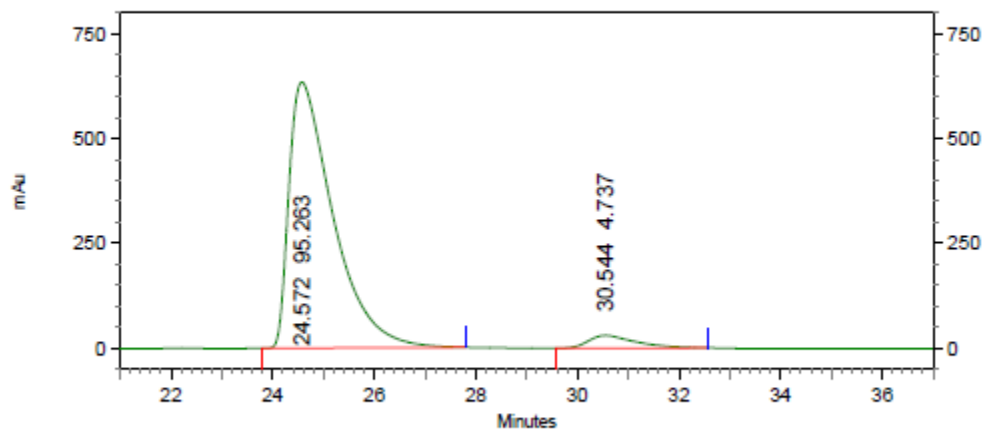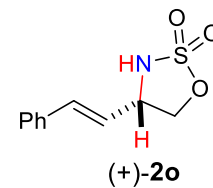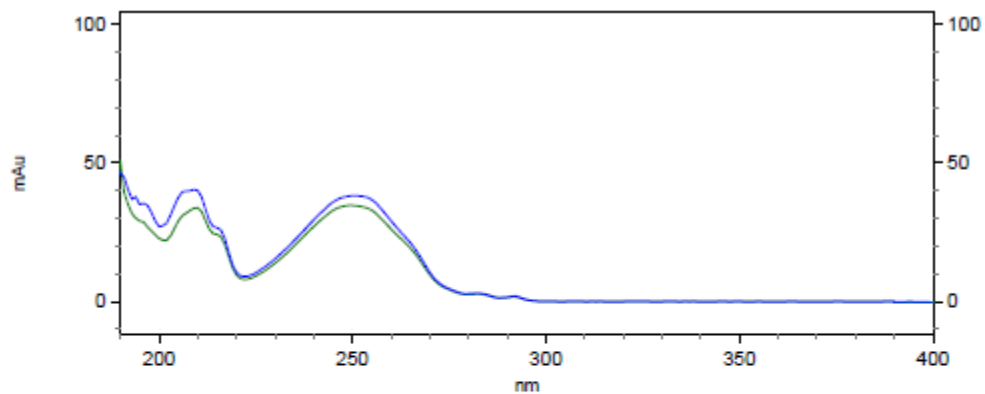

4: 250 nm, 4  
nm Results

| Pk # | Retention Time | Area Percent |
|------|----------------|--------------|
| 1    | 24.572         | 95.263       |
| 2    | 30.544         | 4.737        |

|        |         |
|--------|---------|
| Totals | 100.000 |
|--------|---------|

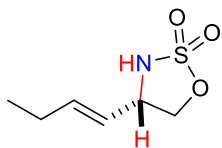

$^1\text{H}$  NMR of **2p**, 400 MHz,  $\text{CDCl}_3$

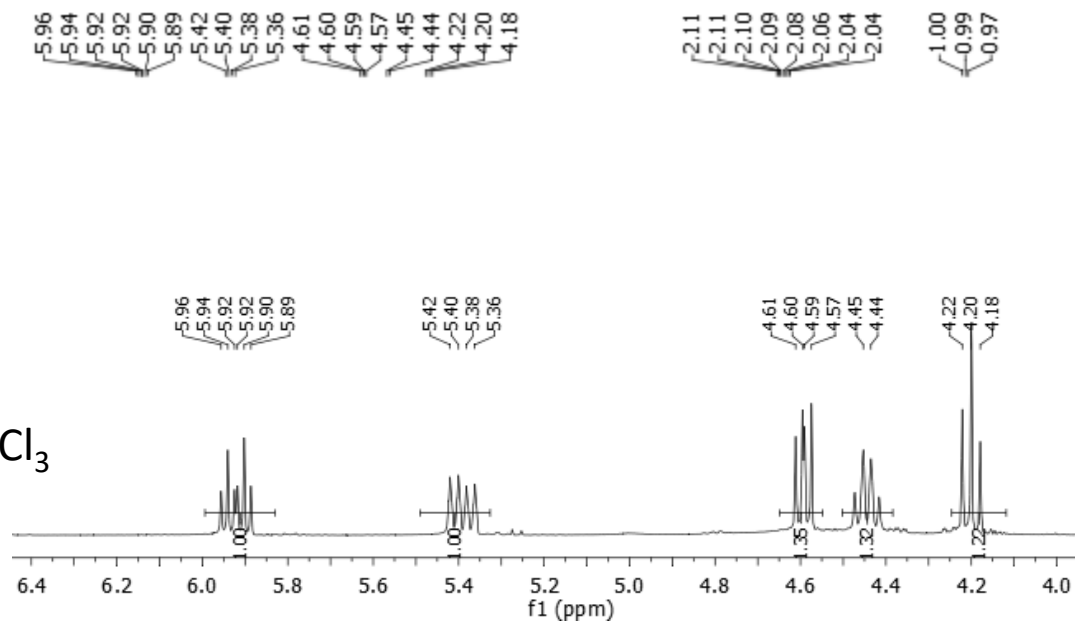

$\text{CHCl}_3$

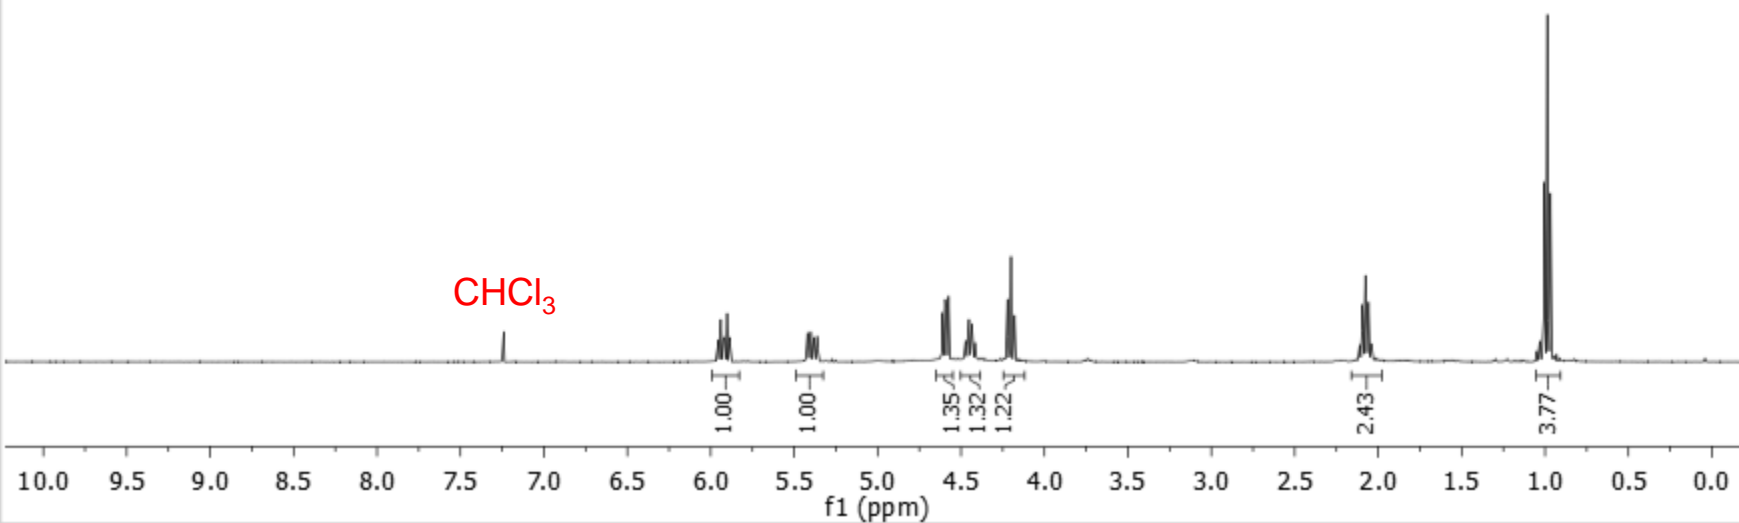

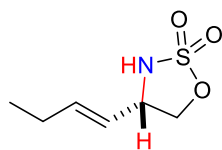

$^{13}\text{C}$  NMR of **2p**, 100 MHz,  $\text{CDCl}_3$

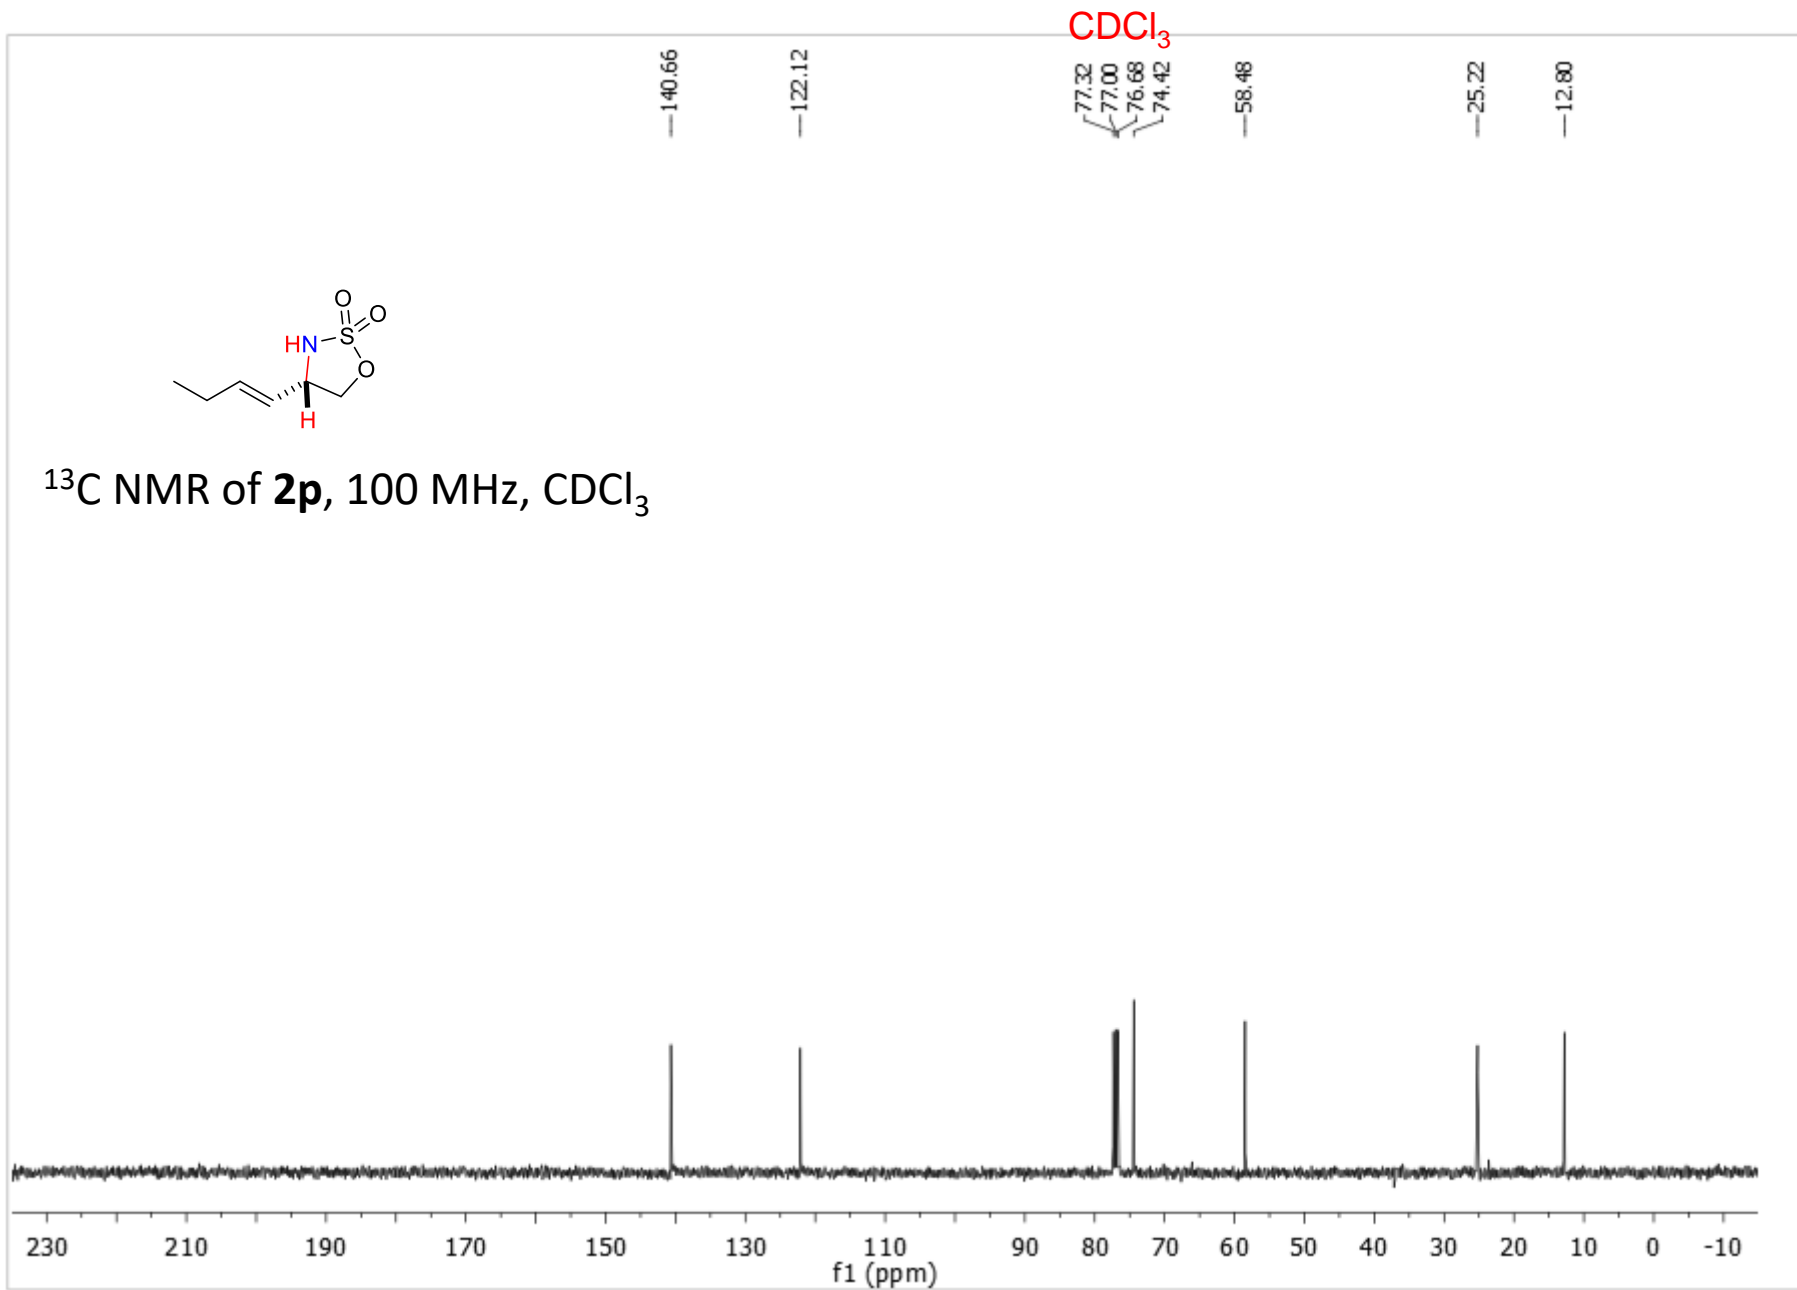

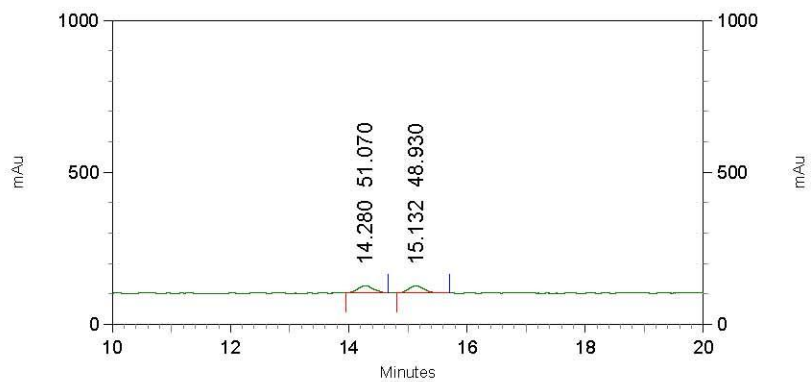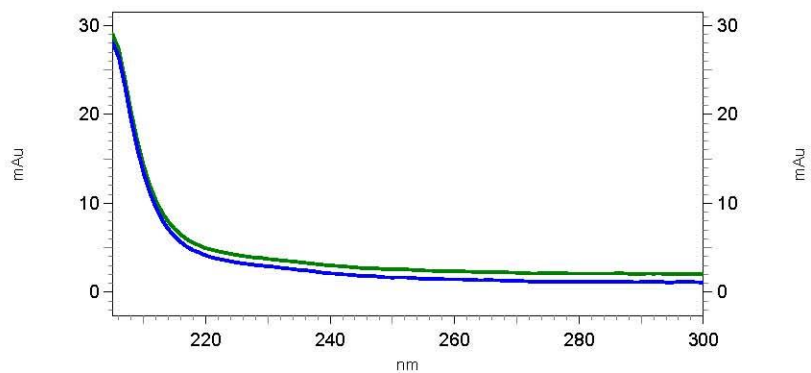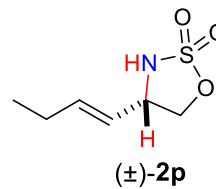

20: 205 nm, 4 nm  
Results

| Pk #   | Name | Retention Time | Area Percent |
|--------|------|----------------|--------------|
| 1      |      | 14.280         | 51.070       |
| 2      |      | 15.132         | 48.930       |
| Totals |      |                | 100.000      |

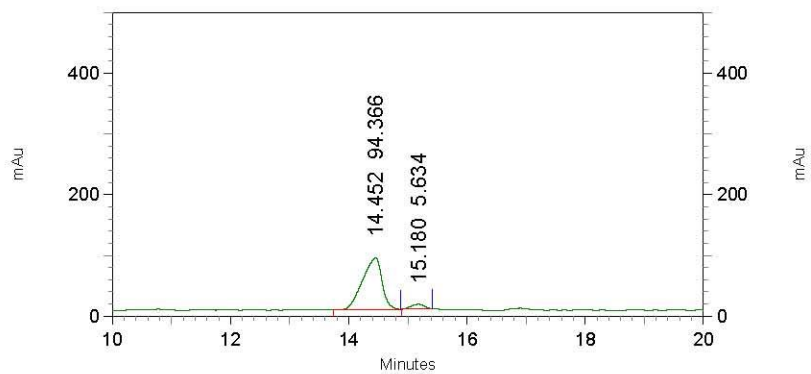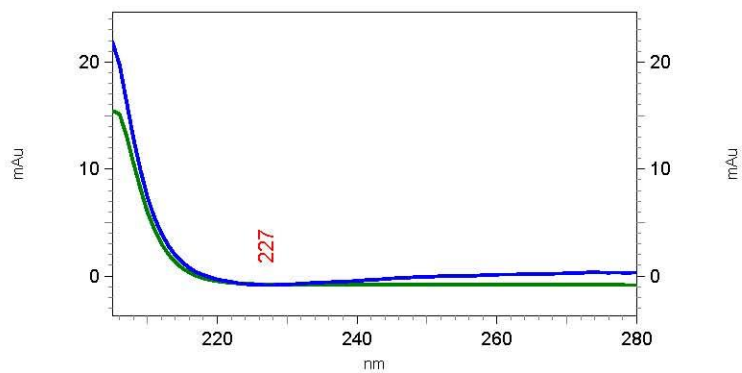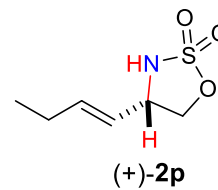

6: 205 nm, 4 nm  
Results

| Pk #   | Name | Retention Time | Area Percent |
|--------|------|----------------|--------------|
| 1      |      | 14.452         | 94.366       |
| 2      |      | 15.180         | 5.634        |
| Totals |      |                | 100.000      |



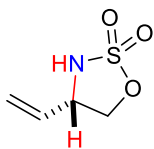

$^1\text{H}$  NMR of **2q**, 500 MHz,  $\text{CDCl}_3$

$\text{CHCl}_3$

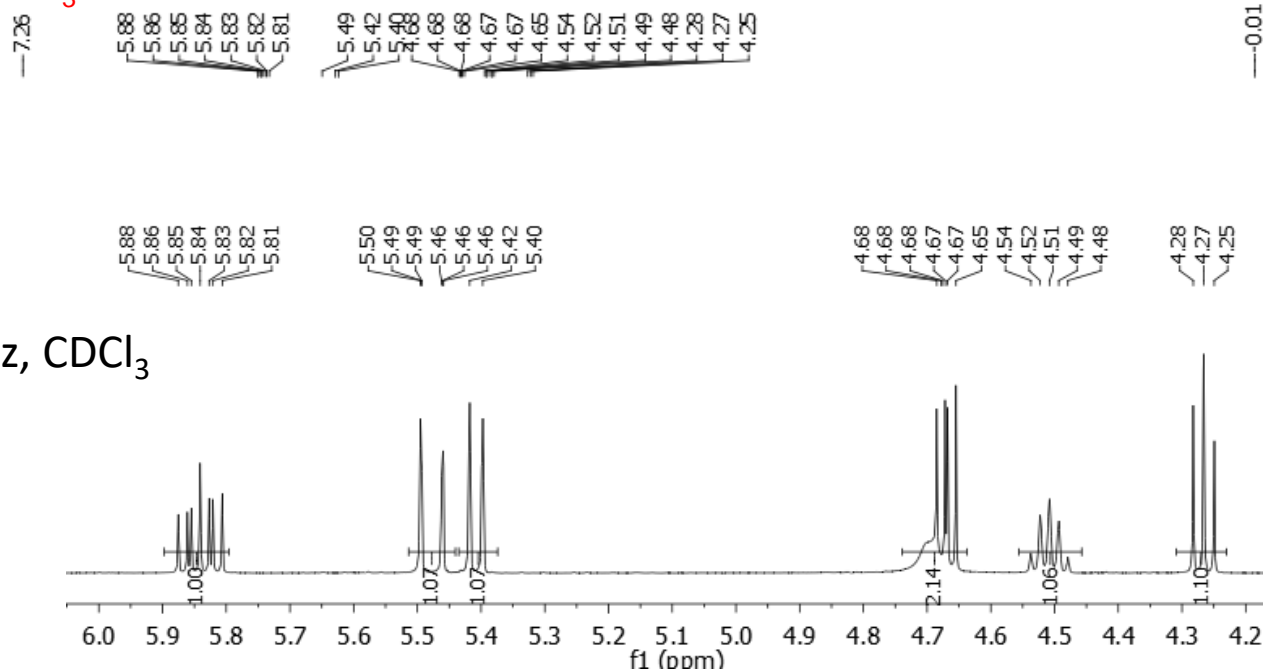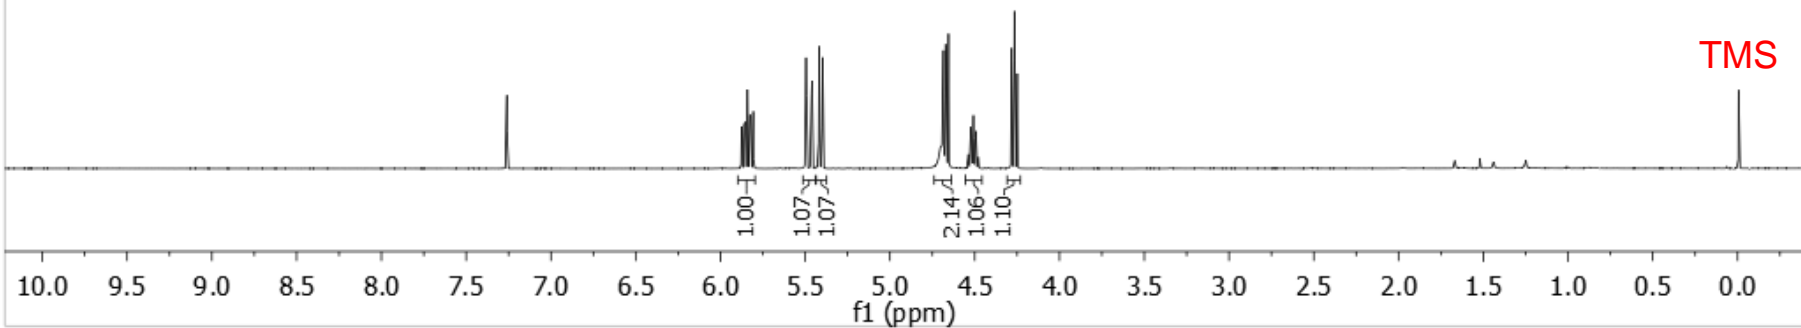



$^{13}\text{C}$  NMR of **2q**, 150 MHz,  $\text{CDCl}_3$

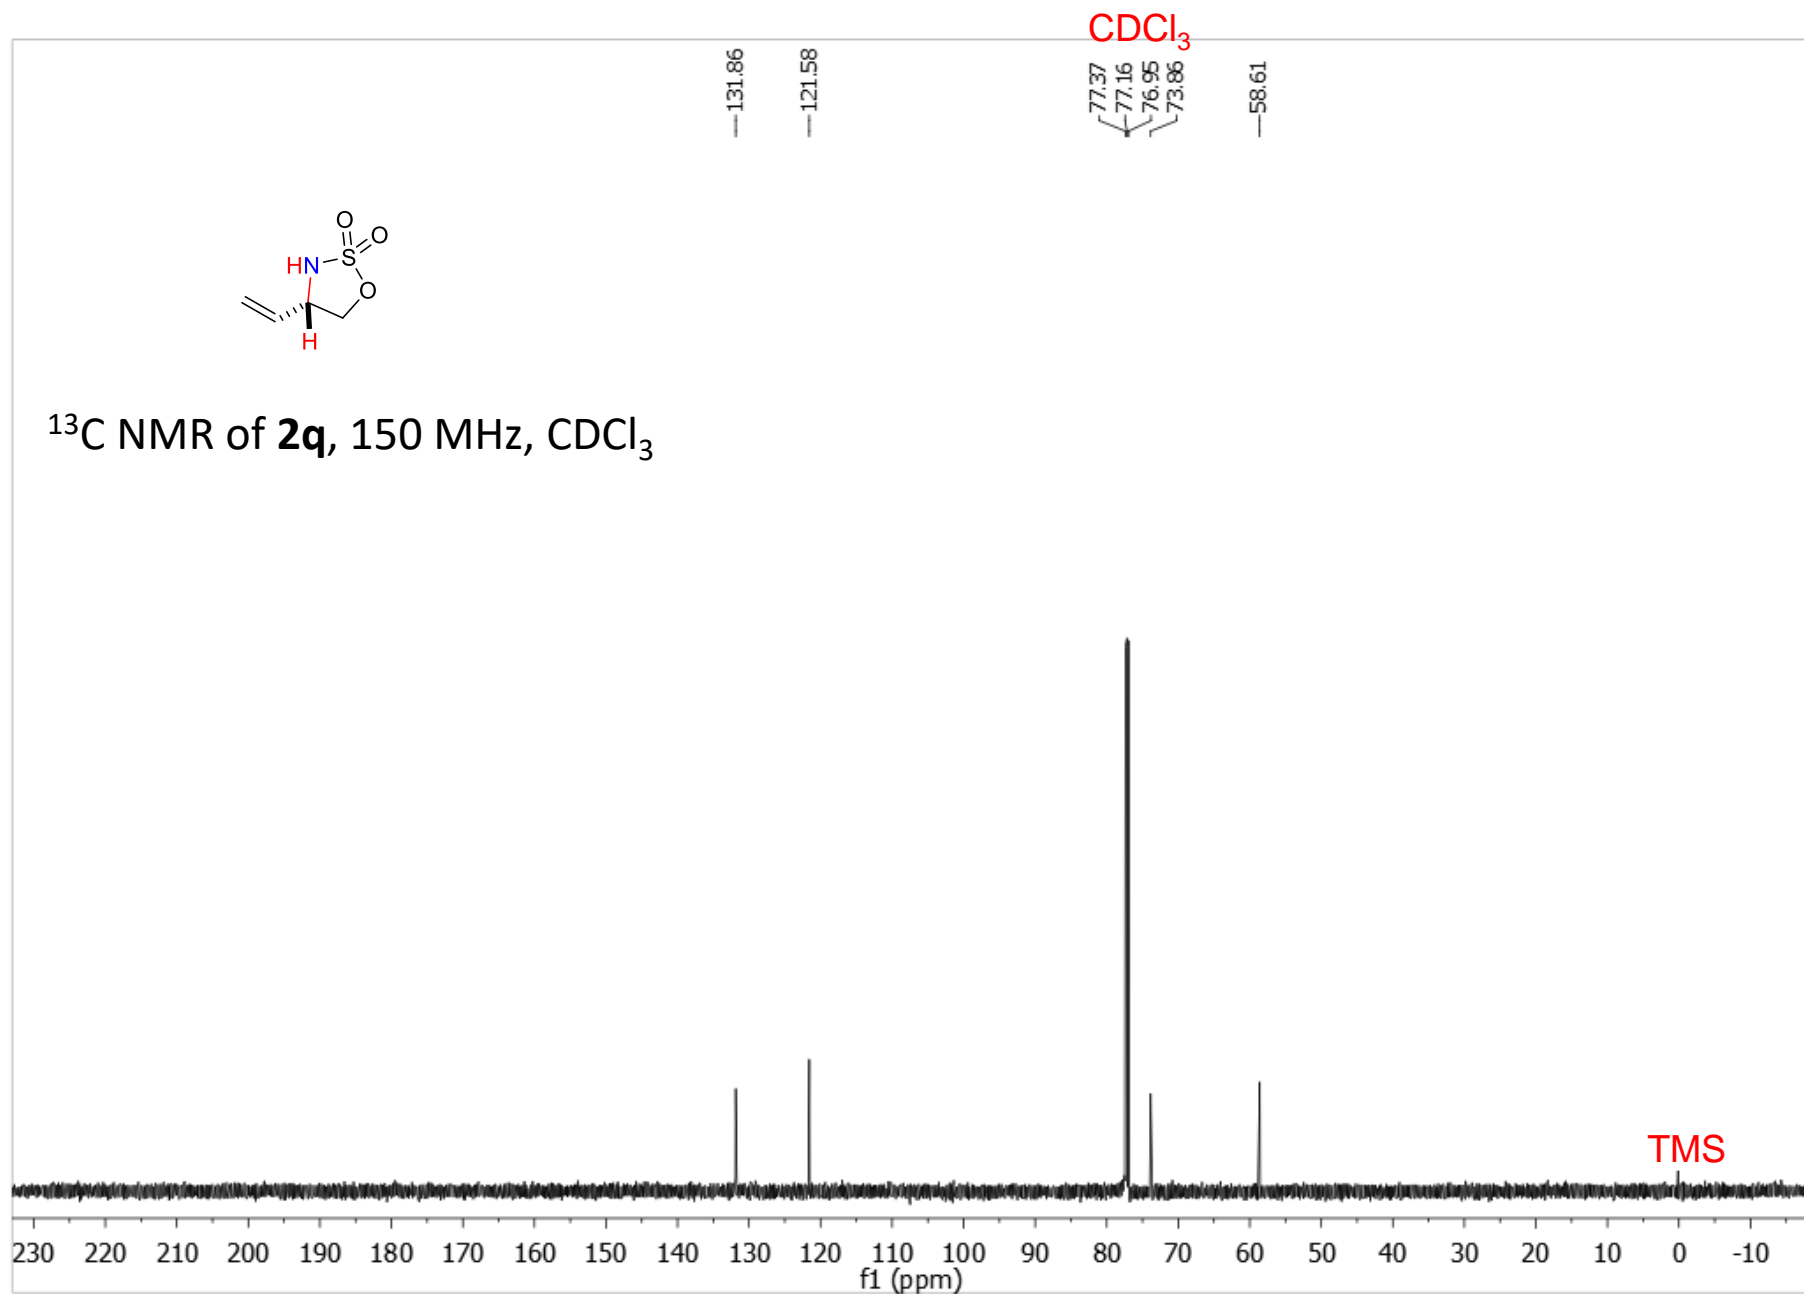

CHCl<sub>3</sub>

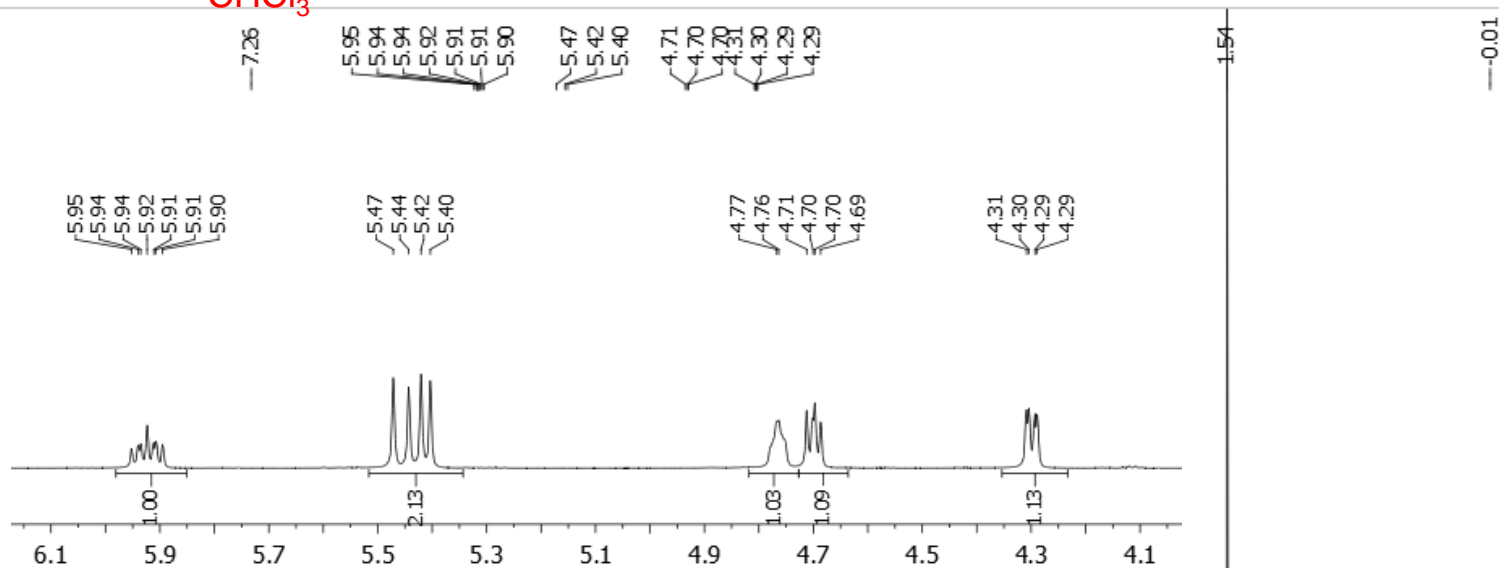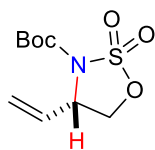

<sup>1</sup>H NMR of *N*-Boc-**2q**, 600 MHz, CDCl<sub>3</sub>

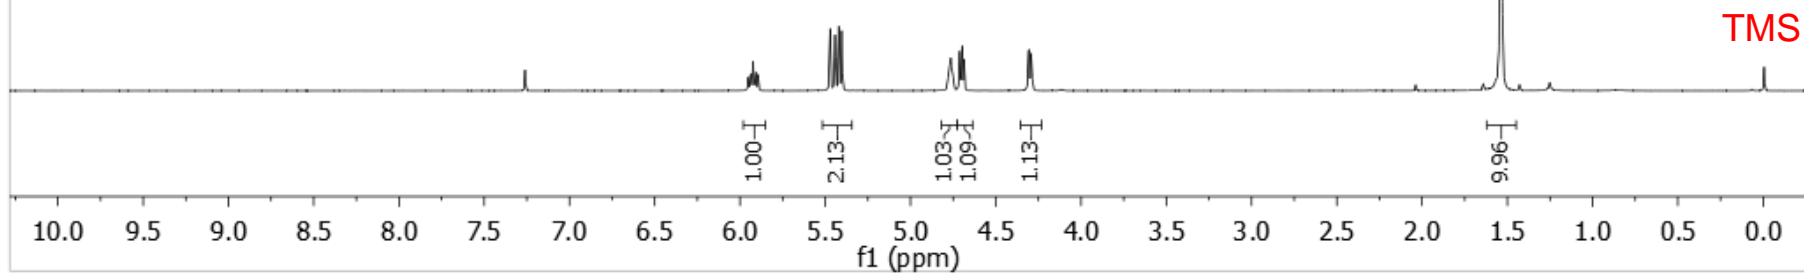

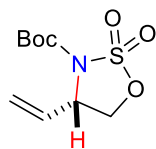

$^{13}\text{C}$  NMR of *N*-Boc-2q, 150 MHz,  $\text{CDCl}_3$

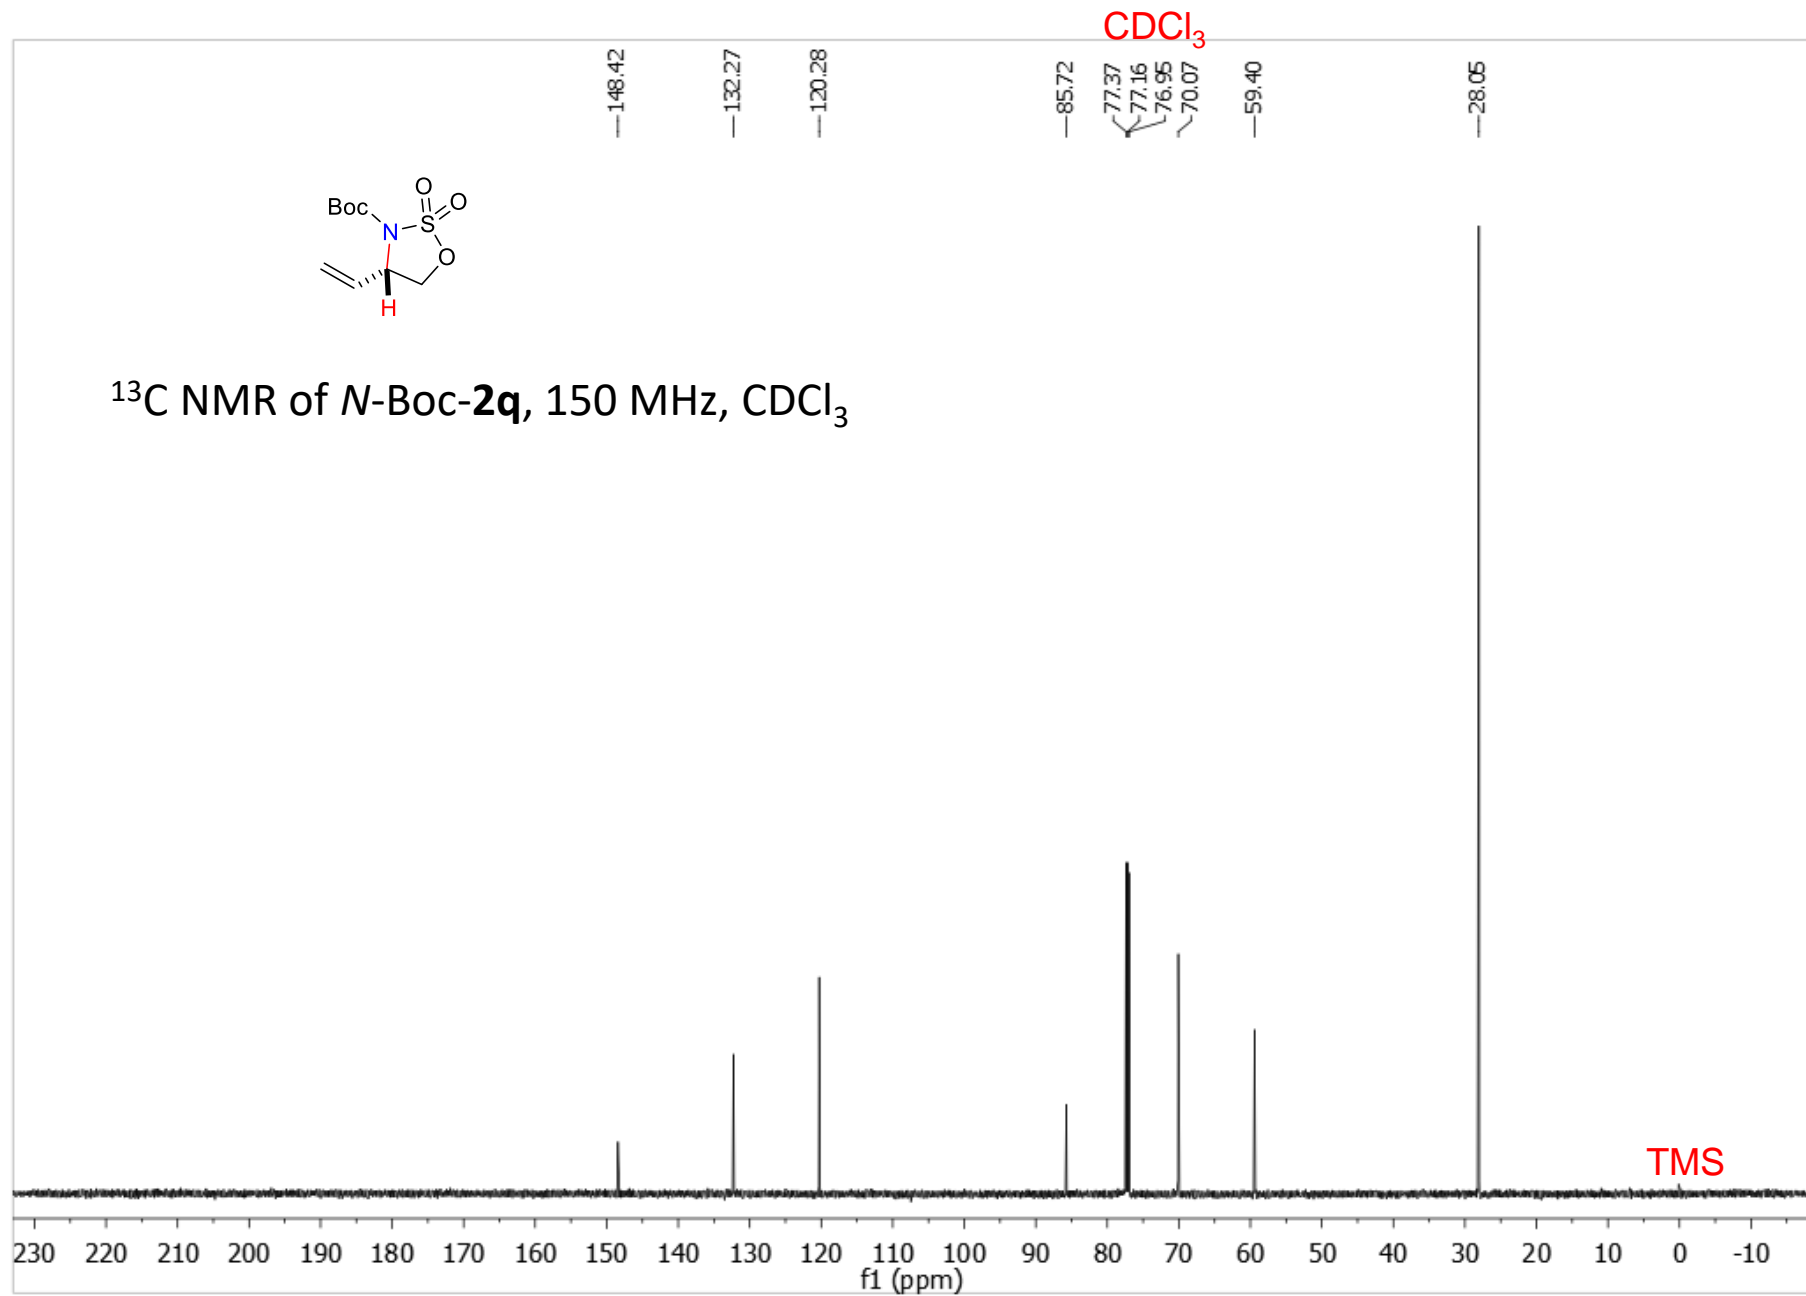

CHCl<sub>3</sub>

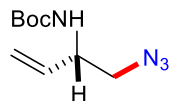

<sup>1</sup>H NMR of N<sub>3</sub>-**3q**, 600 MHz, CDCl<sub>3</sub>

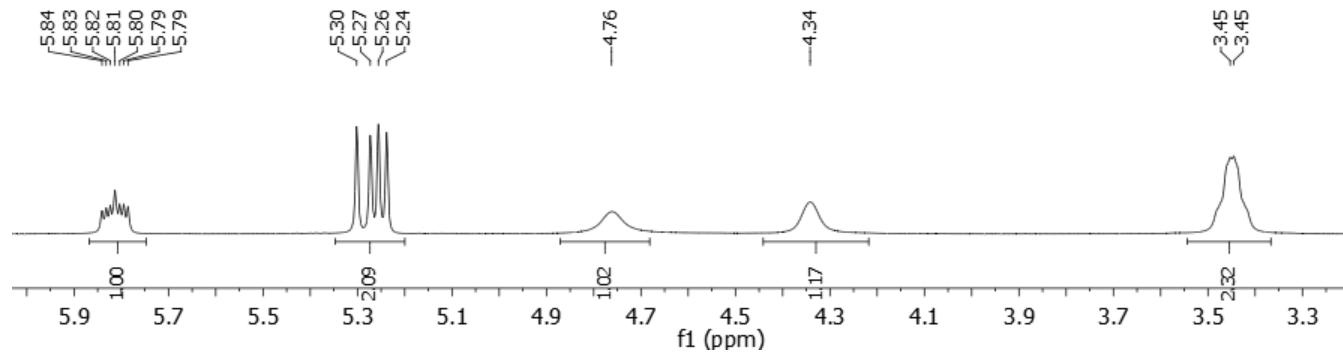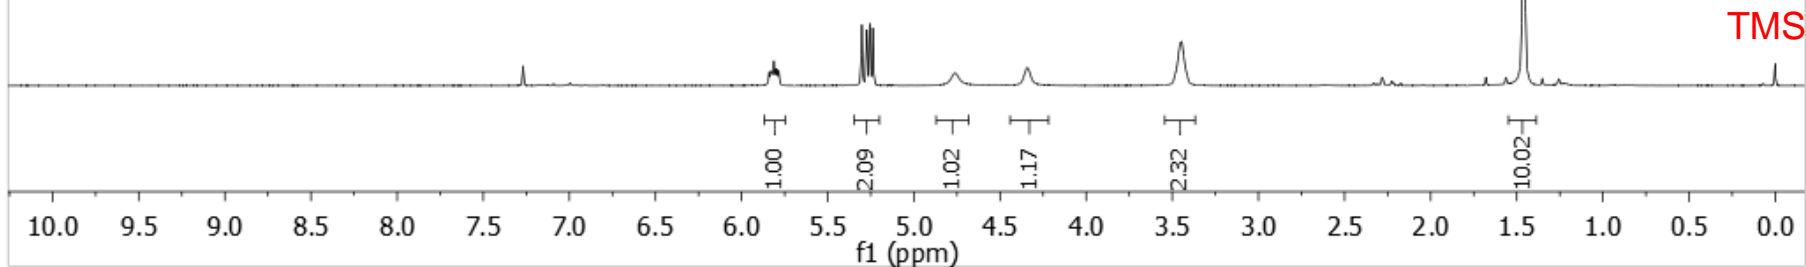

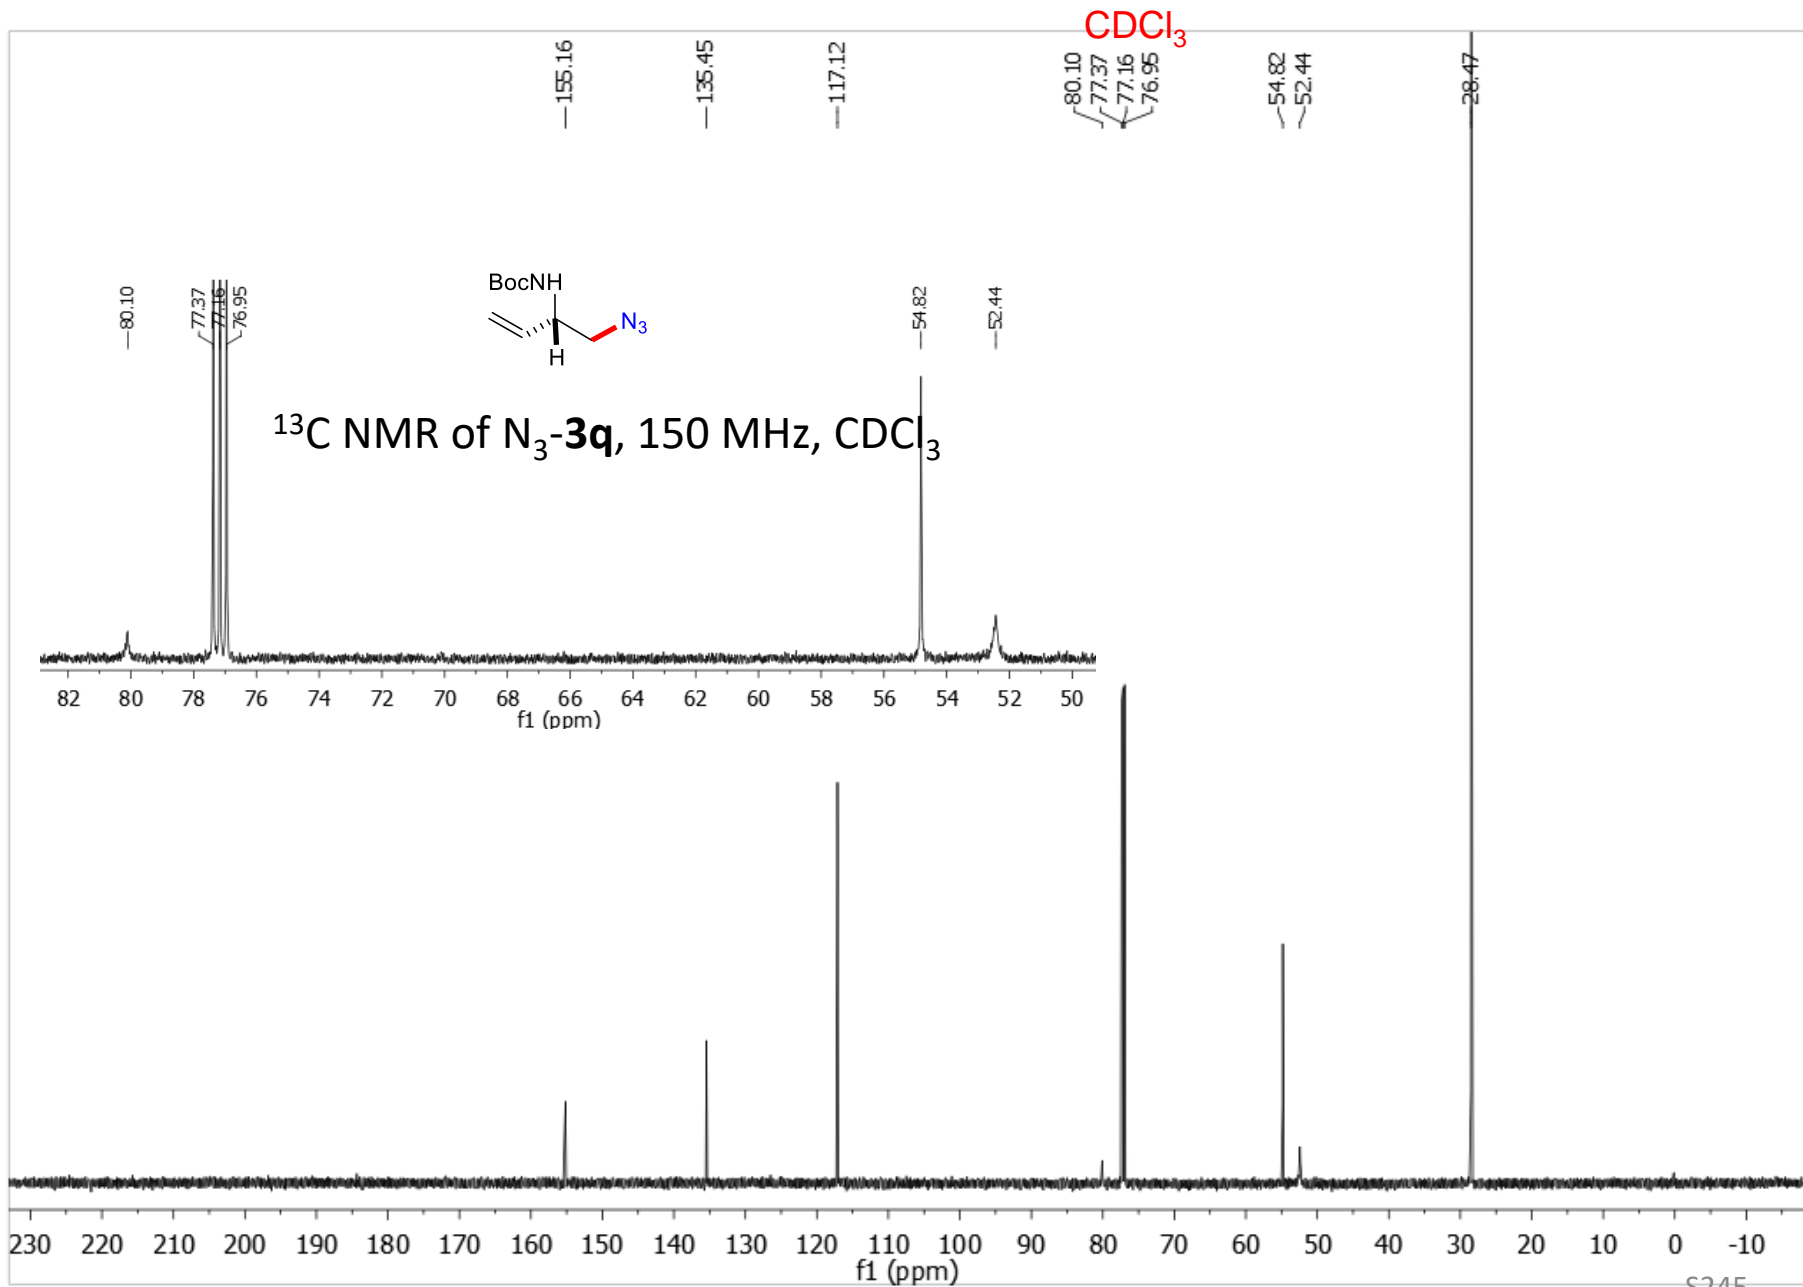

C:\EZStart\Projects\Default\Data\K0L-401-IC-2-1mL-3  
 C:\Documents and Settings\zhang\Desktop\DSW\04042018.met

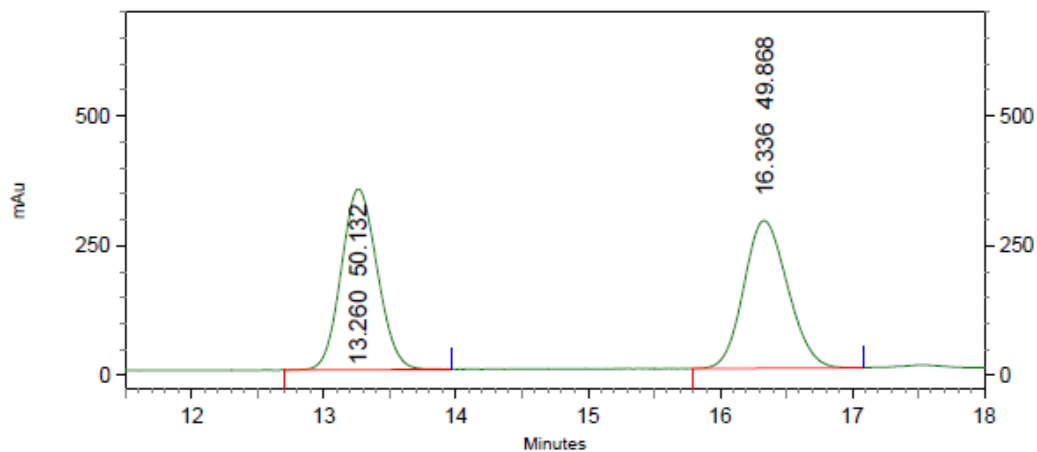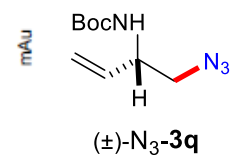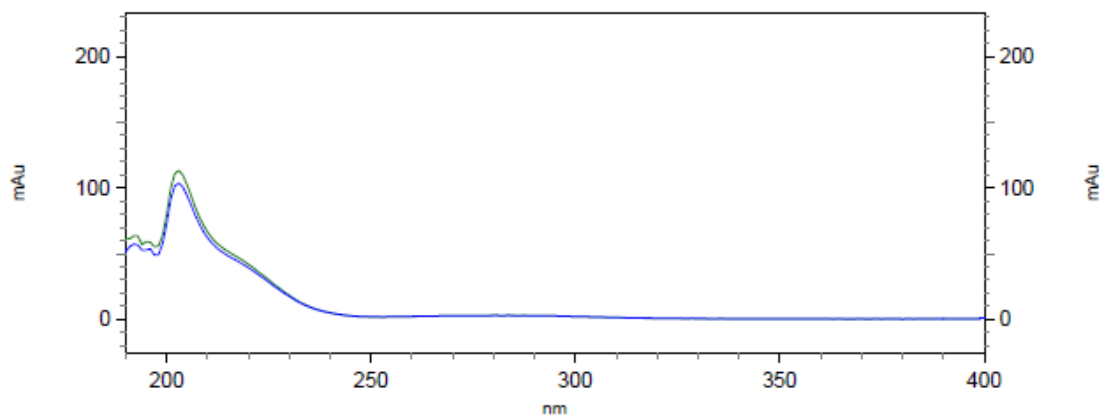

4: 221 nm, 4  
 nm Results

| Pk # | Retention Time | Area Percent |
|------|----------------|--------------|
| 1    | 13.260         | 50.132       |
| 2    | 16.336         | 49.868       |

|        |  |         |
|--------|--|---------|
| Totals |  | 100.000 |
|--------|--|---------|

C:\EZStart\Projects\Default\Data\K0L-400-IC-2%-1mL  
 C:\Documents and Settings\zhang\Desktop\DSW\04042018.met

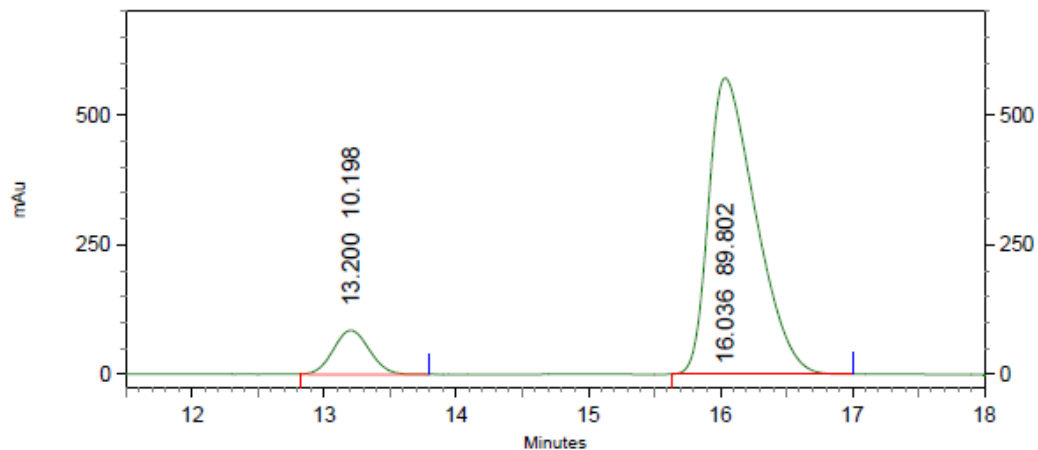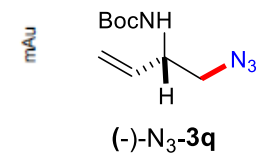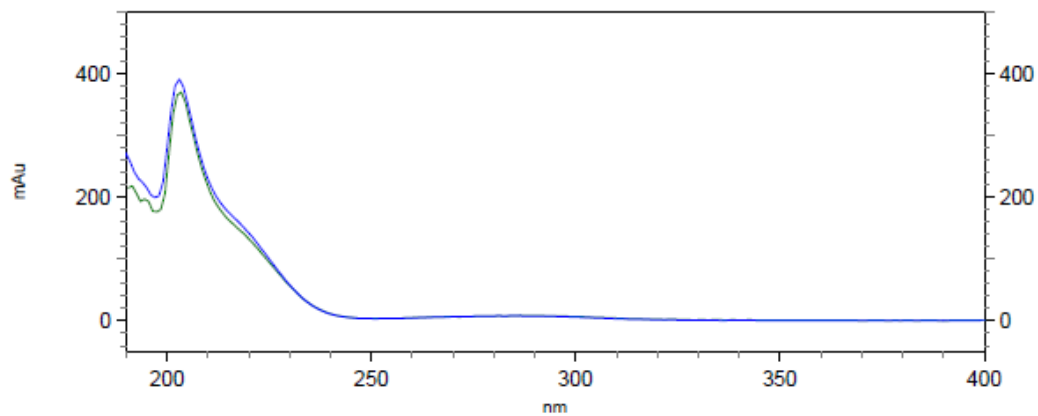

4: 221 nm, 4  
 nm Results

| Pk #   | Retention Time | Area Percent |
|--------|----------------|--------------|
| 1      | 13.200         | 10.198       |
| 2      | 16.036         | 89.802       |
| Totals |                | 100.000      |



CHCl<sub>3</sub>

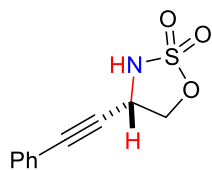

<sup>1</sup>H NMR of **2r**, 400 MHz, CDCl<sub>3</sub>

7.44  
7.43  
7.42  
7.42  
7.36  
7.35  
7.33  
7.24

4.91  
4.89  
4.89  
4.80  
4.78  
4.76  
4.51  
4.49

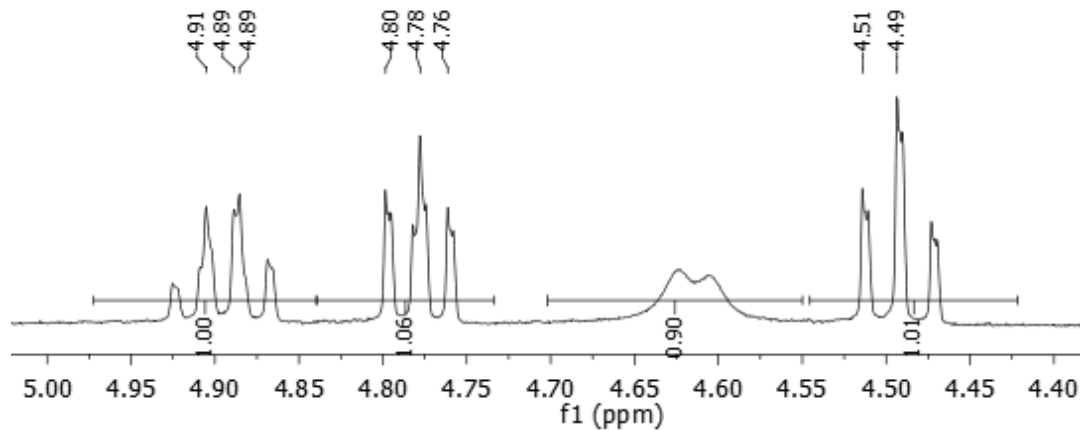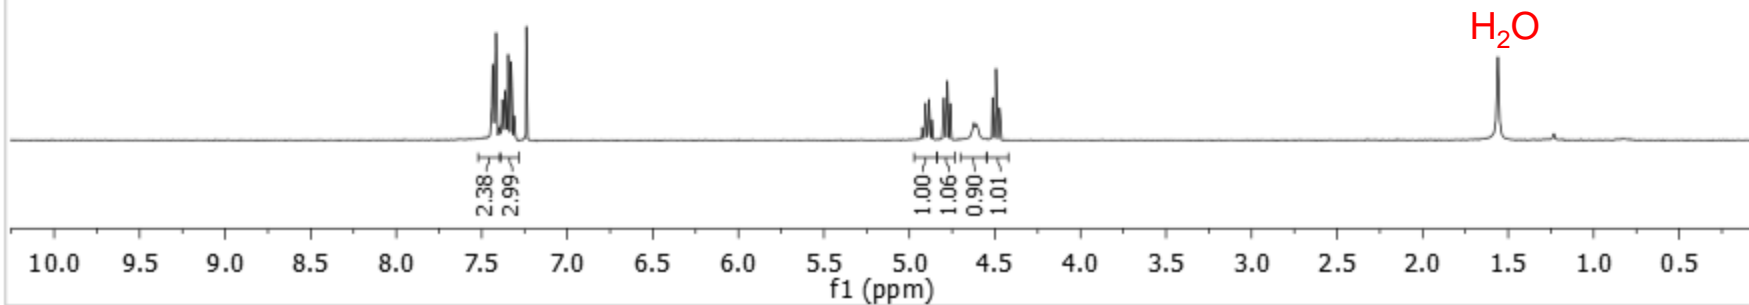

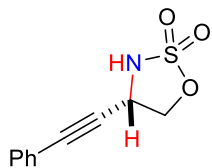

$^{13}\text{C}$  NMR of **2r**, 100 MHz,  $\text{CDCl}_3$

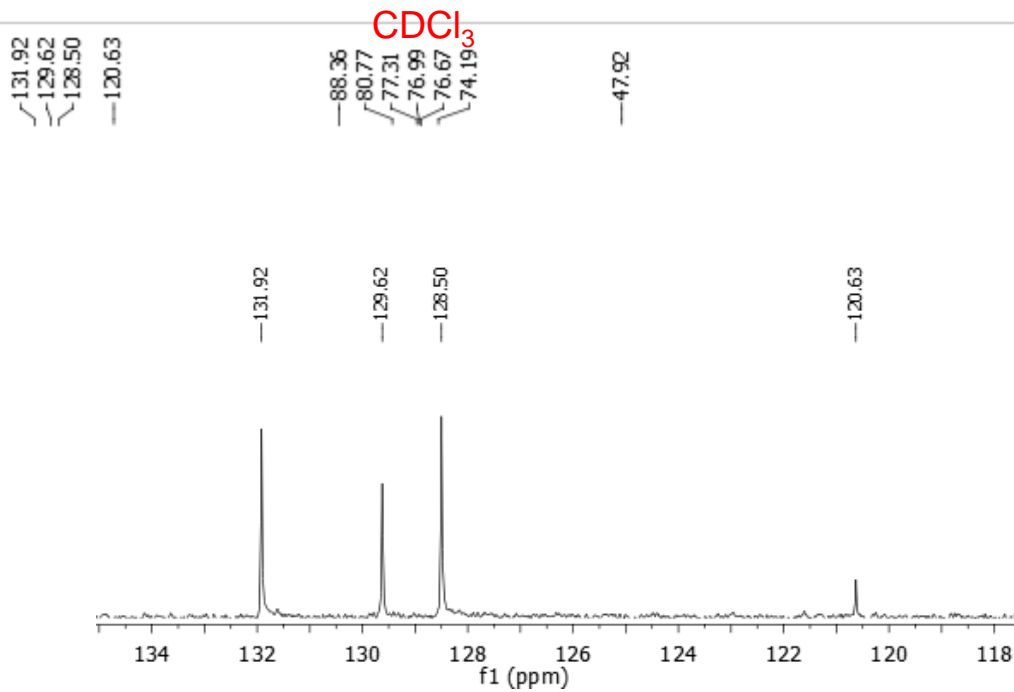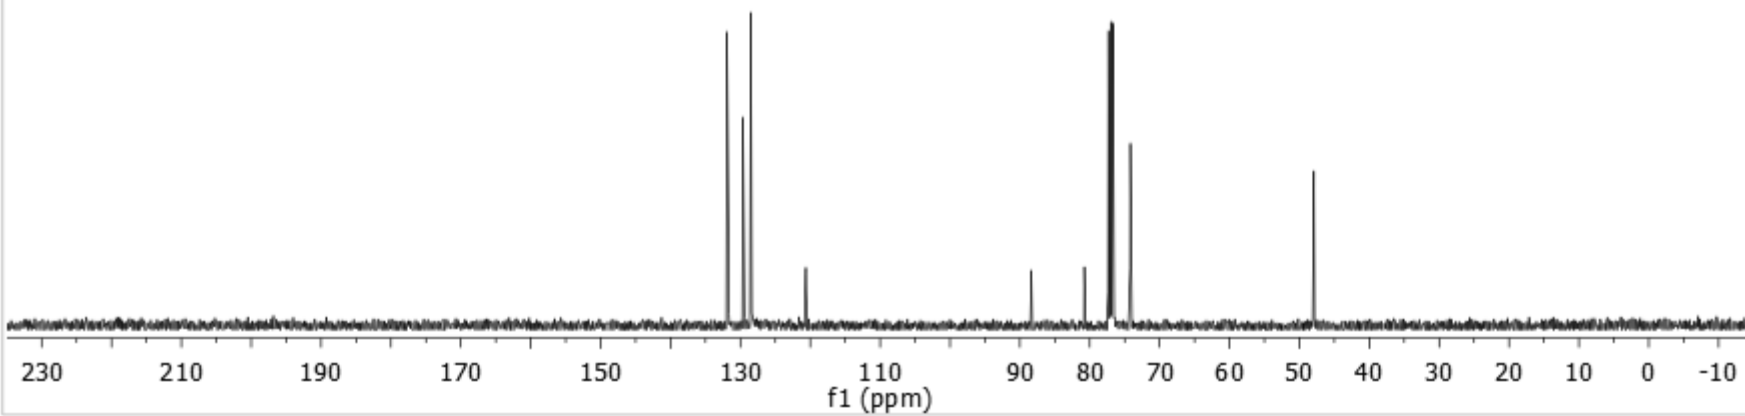

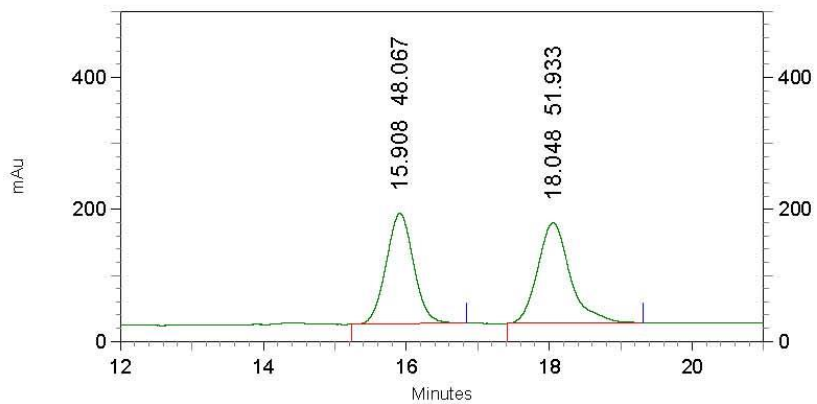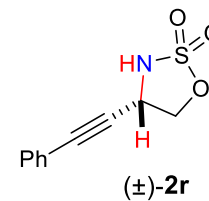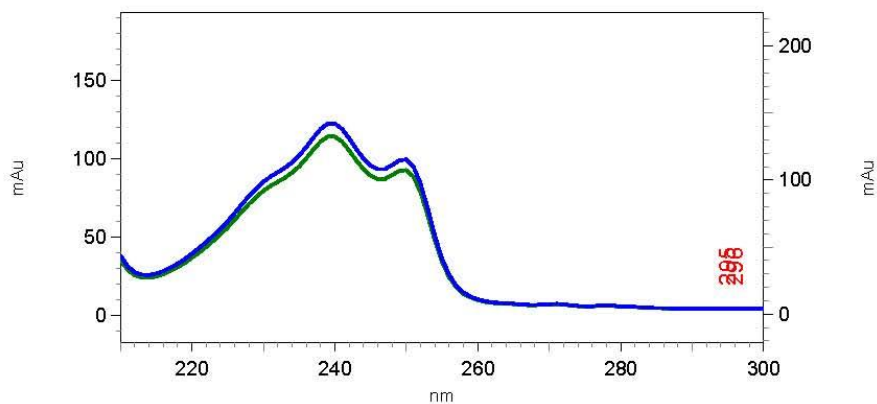

8: 257 nm, 4 nm

Results

| Pk #   | Name | Retention Time | Area Percent |
|--------|------|----------------|--------------|
| 1      |      | 15.908         | 48.067       |
| 2      |      | 18.048         | 51.933       |
| Totals |      |                | 100.000      |

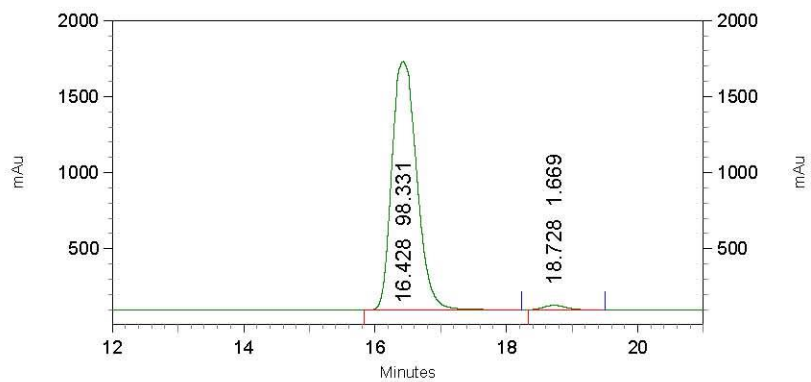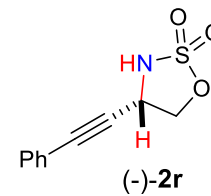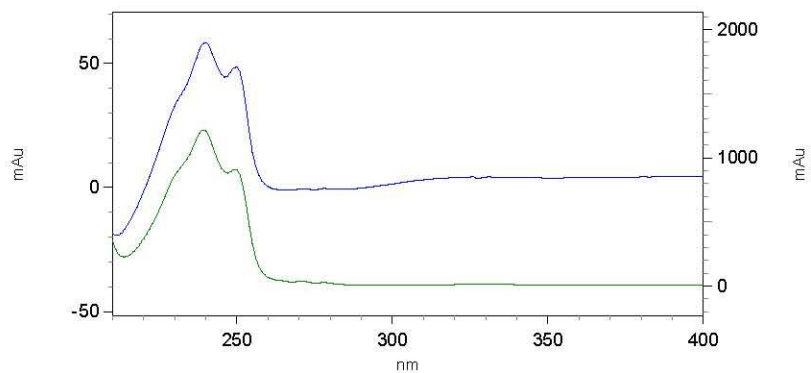

1: 239 nm, 4 nm

Results

| Name | Retention Time | Area Percent | Pk # |
|------|----------------|--------------|------|
|      | 16.428         | 98.331       | 1    |
|      | 18.728         | 1.669        | 2    |

|        |  |         |  |
|--------|--|---------|--|
| Totals |  | 100.000 |  |
|--------|--|---------|--|



---

● **Alert level C**  
PLAT987\_ALERT\_1\_C The Flack x is >> 0 - Do a BASF/TWIN Refinement Please Check

---

● **Alert level G**

|                                                                    |              |
|--------------------------------------------------------------------|--------------|
| PLAT033_ALERT_4_G Flack x Value Deviates > 3.0 * sigma from Zero . | 0.032 Note   |
| PLAT371_ALERT_2_G Long C(sp2)-C(sp1) Bond C6 - C7 .                | 1.44 Ang.    |
| PLAT395_ALERT_2_G Deviating X-O-Y Angle From 120 for O11           | 111.9 Degree |
| PLAT791_ALERT_4_G Model has Chirality at C9 (Chiral SPGR)          | S Verify     |
| PLAT912_ALERT_4_G Missing # of FCF Reflections Above STh/L= 0.600  | 2 Note       |
| PLAT961_ALERT_5_G Dataset Contains no Negative Intensities .....   | Please Check |
| PLAT978_ALERT_2_G Number C-C Bonds with Positive Residual Density. | 6 Info       |

---

0 **ALERT level A** = Most likely a serious problem - resolve or explain  
0 **ALERT level B** = A potentially serious problem, consider carefully  
1 **ALERT level C** = Check. Ensure it is not caused by an omission or oversight  
7 **ALERT level G** = General information/check it is not something unexpected

1 ALERT type 1 CIF construction/syntax error, inconsistent or missing data  
3 ALERT type 2 Indicator that the structure model may be wrong or deficient  
0 ALERT type 3 Indicator that the structure quality may be low  
3 ALERT type 4 Improvement, methodology, query or suggestion  
1 ALERT type 5 Informative message, check

---

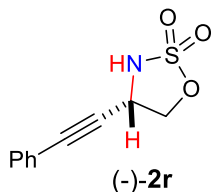

It is advisable to attempt to resolve as many as possible of the alerts in all categories. Often the minor alerts point to easily fixed oversights, errors and omissions in your CIF or refinement strategy, so attention to these fine details can be worthwhile. In order to resolve some of the more serious problems it may be necessary to carry out additional measurements or structure refinements. However, the purpose of your study may justify the reported deviations and the more serious of these should normally be commented upon in the discussion or experimental section of a paper or in the "special\_details" fields of the CIF. checkCIF was carefully designed to identify outliers and unusual parameters, but every test has its limitations and alerts that are not important in a particular case may appear. Conversely, the absence of alerts does not guarantee there are no aspects of the results needing attention. It is up to the individual to critically assess their own results and, if necessary, seek expert advice.

#### Publication of your CIF in IUCr journals

A basic structural check has been run on your CIF. These basic checks will be run on all CIFs submitted for publication in IUCr journals (*Acta Crystallographica*, *Journal of Applied Crystallography*, *Journal of Synchrotron Radiation*); however, if you intend to submit to *Acta Crystallographica Section C* or *E* or *IUCrData*, you should make sure that full publication checks are run on the final version of your CIF prior to submission.

#### Publication of your CIF in other journals

Please refer to the *Notes for Authors* of the relevant journal for any special instructions relating to CIF submission.

---

Datablock: yb\_bx\_91 - ellipsoid plot

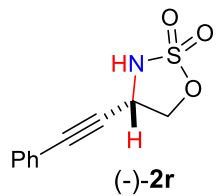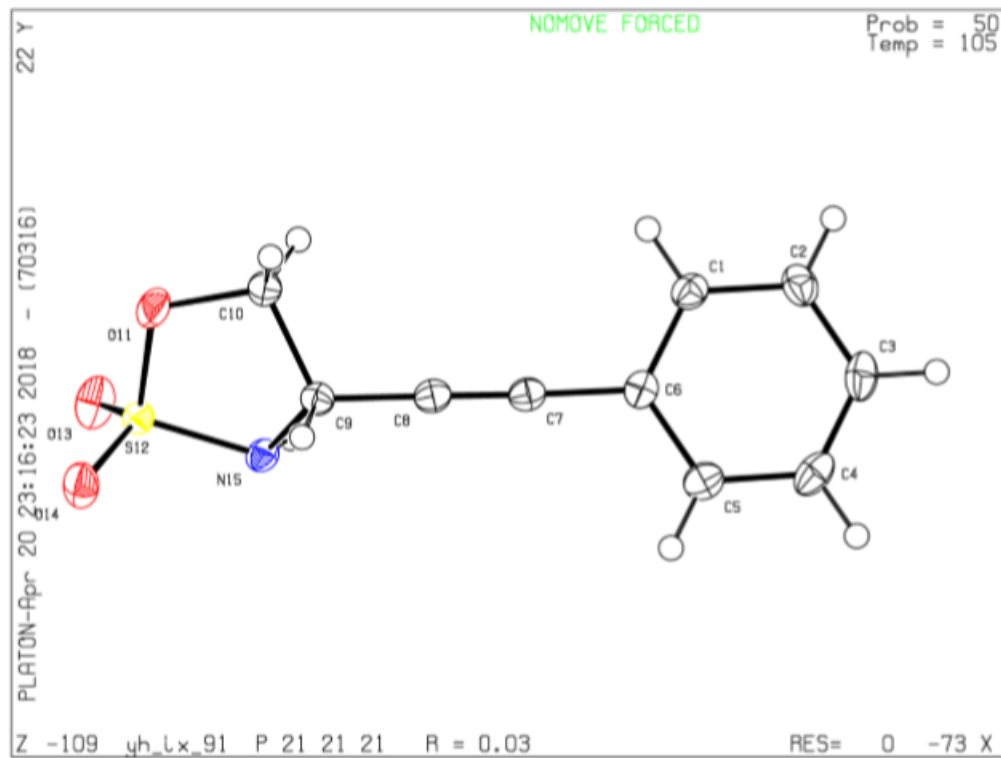

CHCl<sub>3</sub>

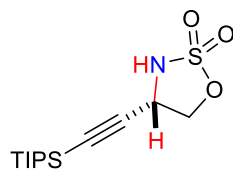

<sup>1</sup>H NMR of **2s**, 250 MHz, CDCl<sub>3</sub>

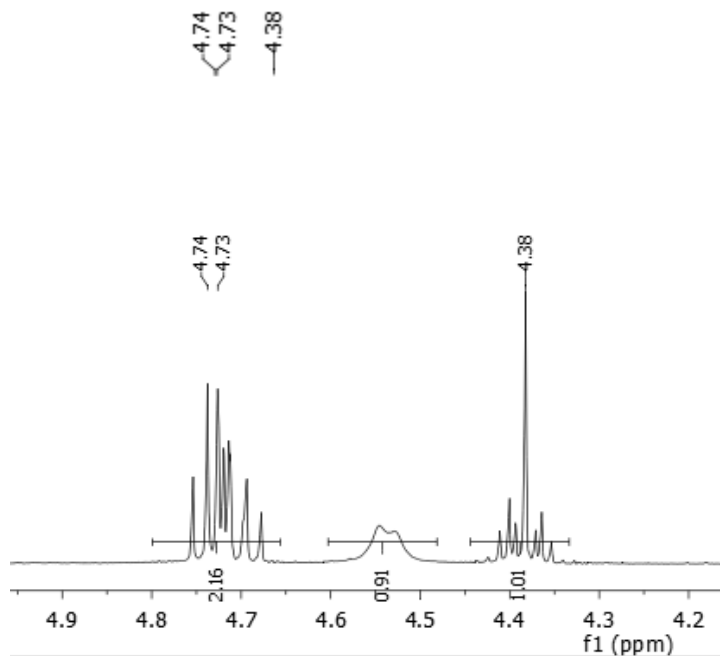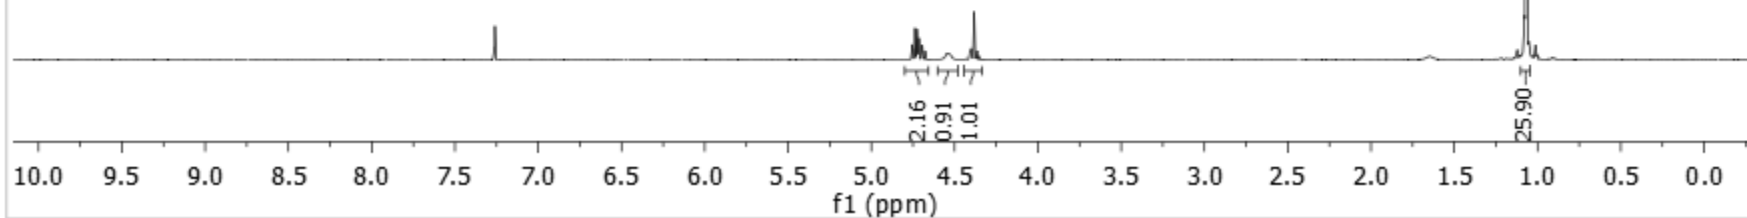



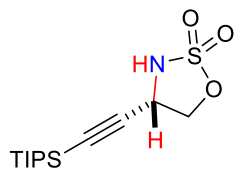

$^{13}\text{C}$  NMR of **2s**, 62.5 MHz,  $\text{CDCl}_3$

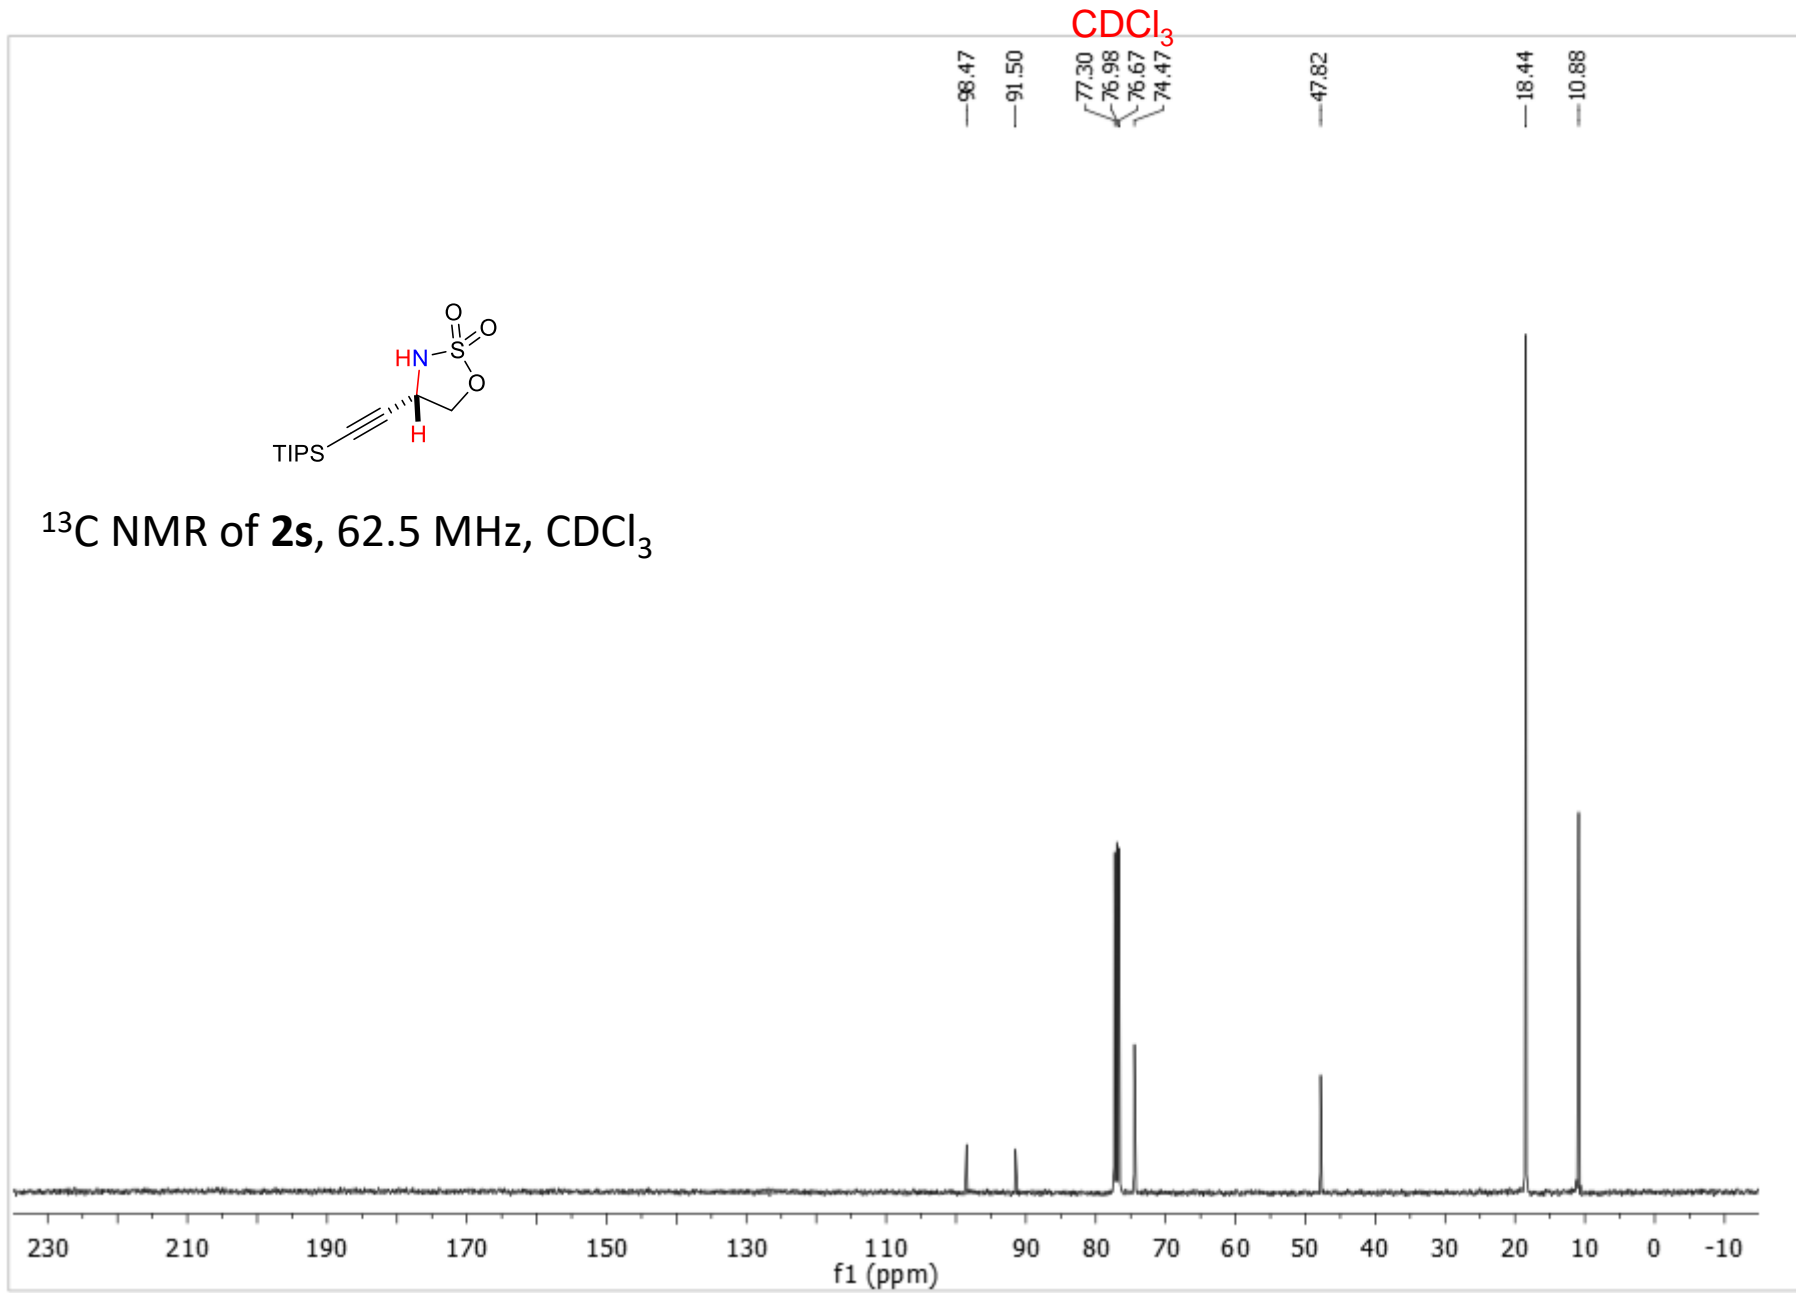

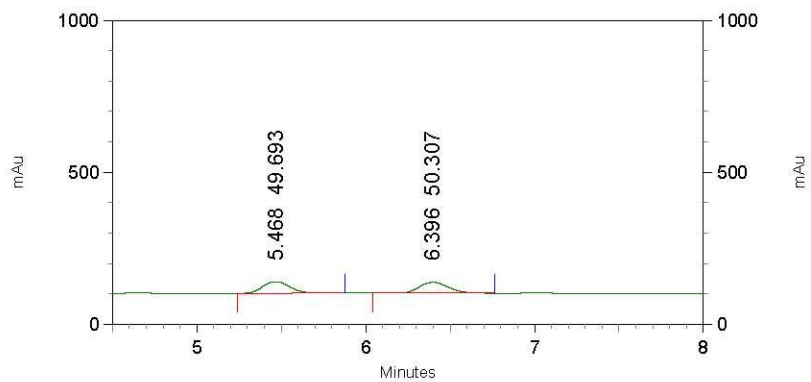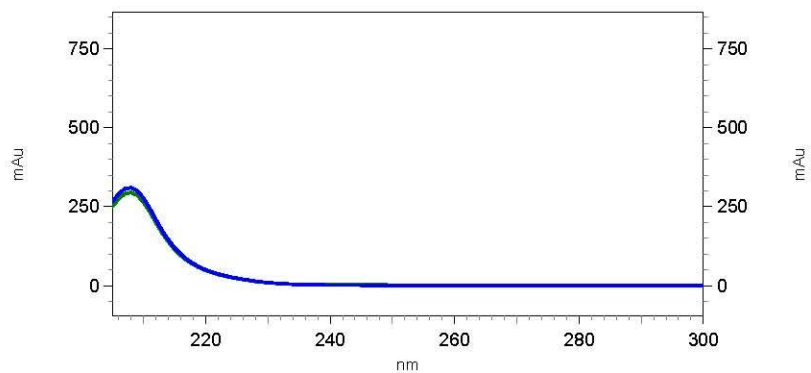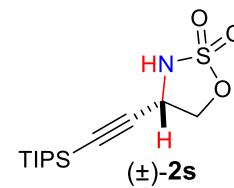

18: 222 nm, 4 nm  
Results

| Pk #   | Name | Retention Time | Area Percent |
|--------|------|----------------|--------------|
| 1      |      | 5.468          | 49.693       |
| 2      |      | 6.396          | 50.307       |
| Totals |      |                | 100.000      |

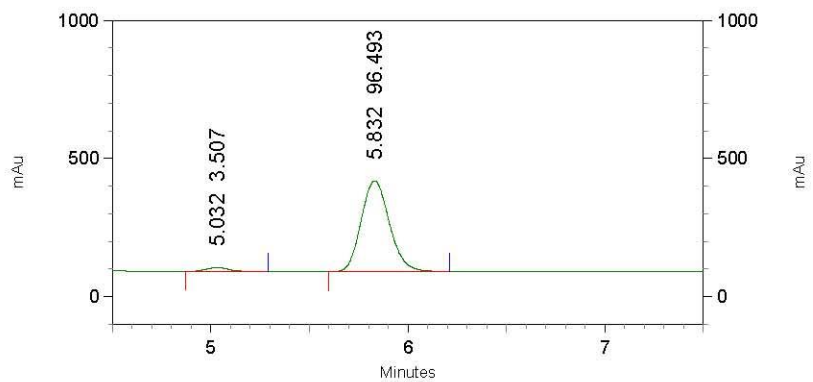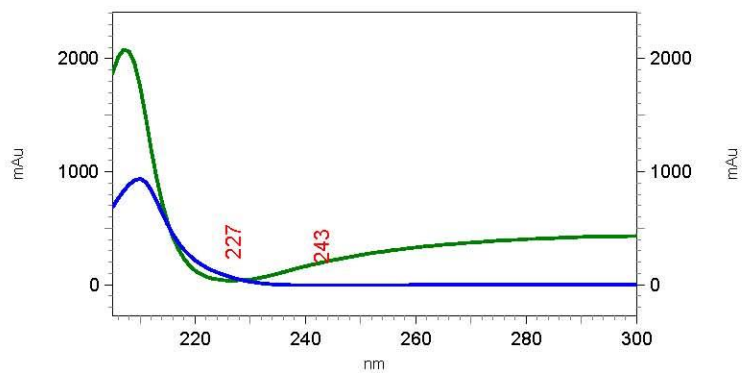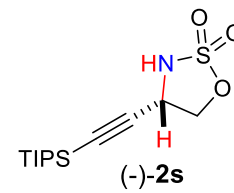

17: 214 nm, 4 nm  
Results

| Pk #   | Name | Retention Time | Area Percent |
|--------|------|----------------|--------------|
| 1      |      | 5.032          | 3.507        |
| 2      |      | 5.832          | 96.493       |
| Totals |      |                | 100.000      |

<sup>1</sup>H NMR of **2t**, 600 MHz, Acetone-D<sub>6</sub>

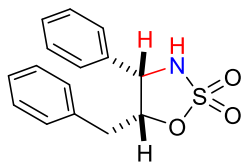

CHCl<sub>3</sub>

-0.00

7.60, 7.58, 7.48, 7.47, 7.46, 7.43, 7.42, 7.29, 7.27, 7.26, 7.23, 7.21, 7.18, 7.17, 5.43, 5.42, 5.42, 5.41, 5.41, 5.41, 5.40, 5.40, 5.32, 5.31, 2.83, 2.69, 2.68, 2.66, 2.66, 2.58, 2.56, 2.55, 2.53, 2.06, 2.05, 2.05, 2.05, 2.04

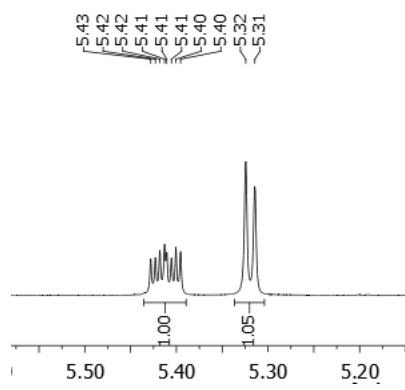

7.60, 7.58, 7.48, 7.47, 7.46, 7.43, 7.42, 7.29, 7.27, 7.26, 7.23, 7.21, 7.18, 7.17

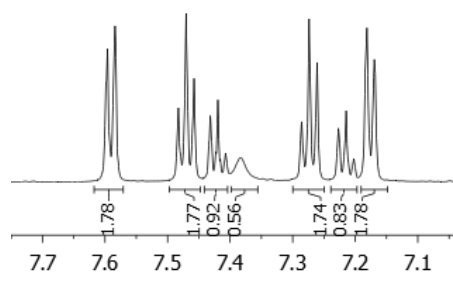

2.83, 2.69, 2.68, 2.66, 2.66, 2.58, 2.56, 2.55, 2.53, 2.06, 2.05, 2.05, 2.05, 2.04

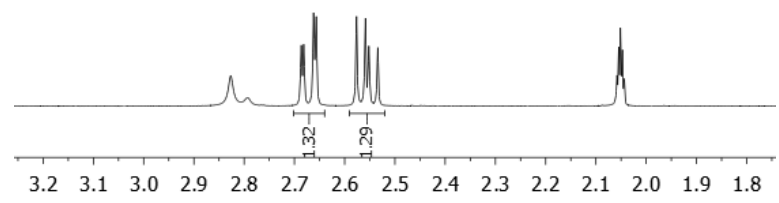

TMS

1.78, 1.77, 0.92, 0.56, 1.74, 0.83, 1.78

1.00, 1.05

1.32, 1.29

10.0, 9.5, 9.0, 8.5, 8.0, 7.5, 7.0, 6.5, 6.0, 5.5, 5.0, 4.5, 4.0, 3.5, 3.0, 2.5, 2.0, 1.5, 1.0, 0.5, 0.0

f1 (ppm)

Acetone- $D_6$

Acetone- $D_6$

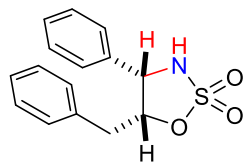

$^{13}\text{C}$  NMR of **2t**, 150 MHz, Acetone- $D_6$

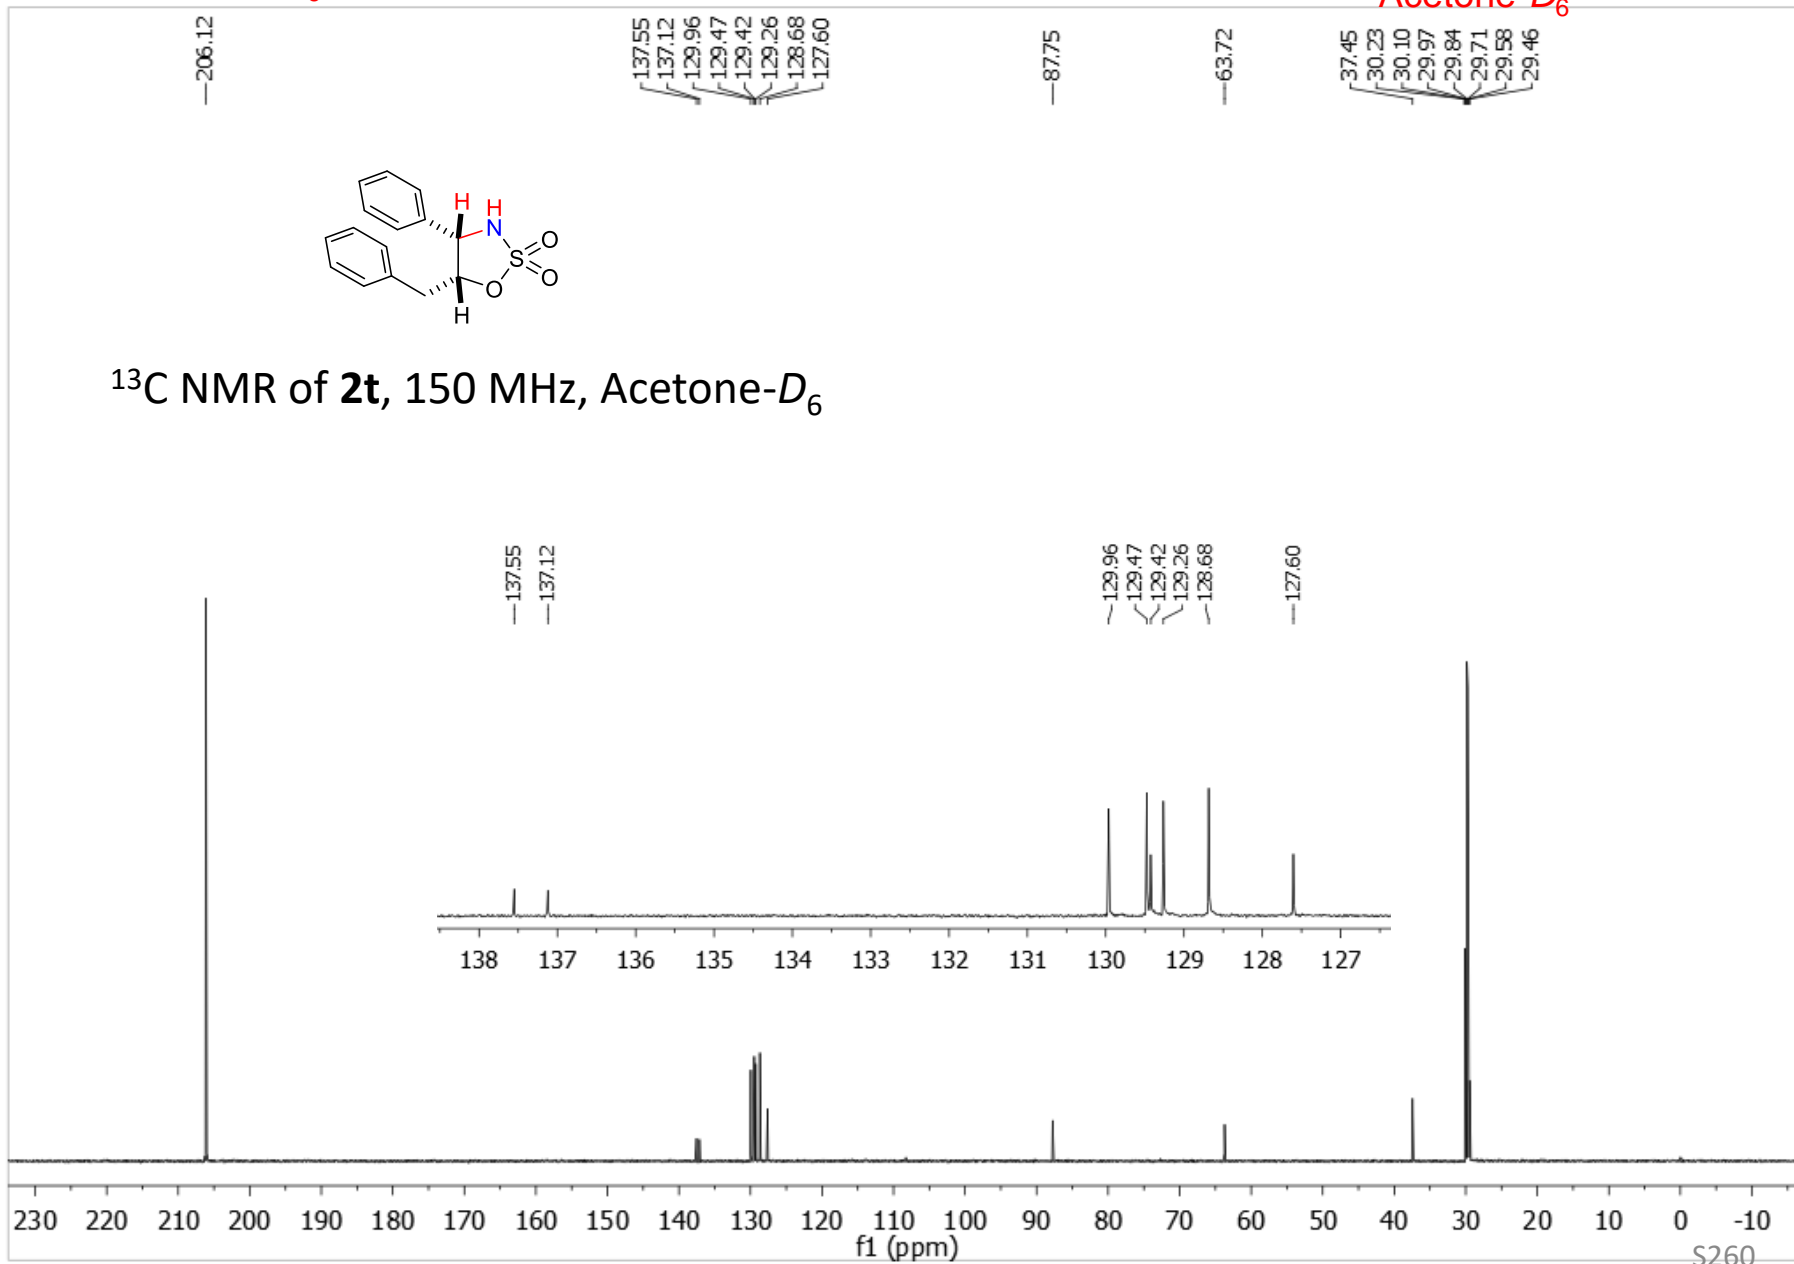

K0L-454-ADH-10%-1.0

C:\EZStart\Projects\Default\Method\lk-5%1.0.met

C:\EZStart\Projects\Default\Data\K0L-454-ADH-10%-1.0

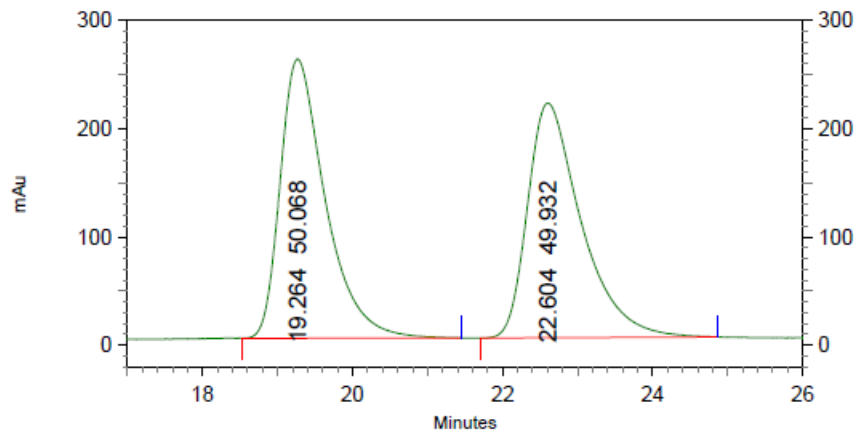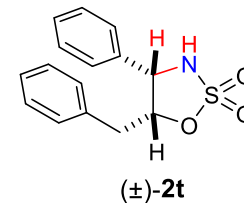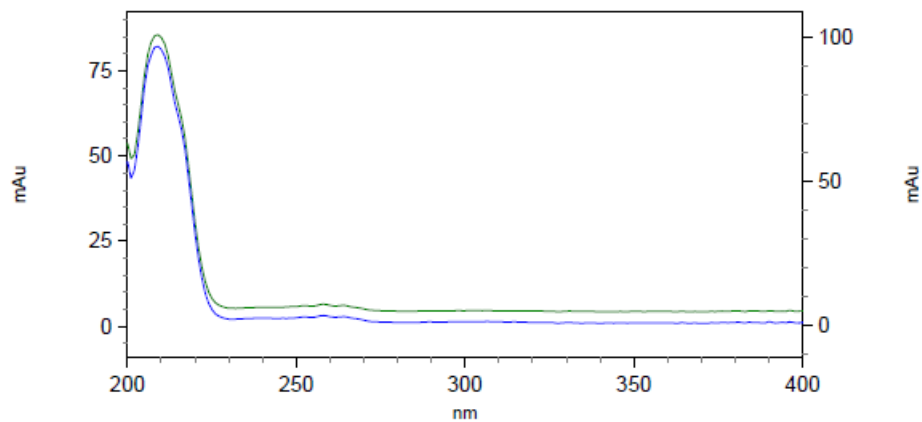

1: 212 nm, 4 nm

Results

| Name | Retention Time | Area Percent | Pk # |
|------|----------------|--------------|------|
|      | 19.264         | 50.068       | 1    |
|      | 22.604         | 49.932       | 2    |

|        |  |         |  |
|--------|--|---------|--|
| Totals |  | 100.000 |  |
|--------|--|---------|--|

K0L-453-ADH-10%-1.0

C:\EZStart\Projects\Default\Method\lk-5%1.0.met

C:\EZStart\Projects\Default\Data\K0L-453-ADH-10%-1.0

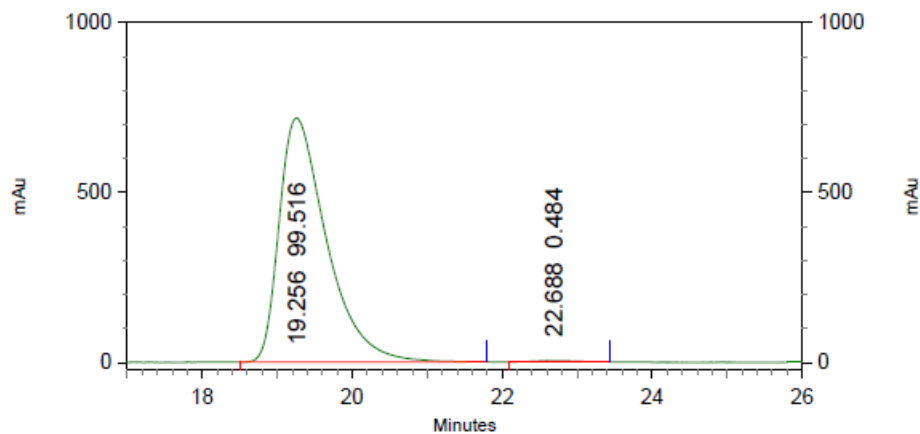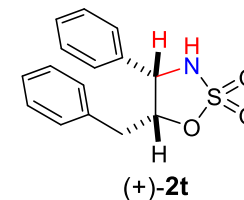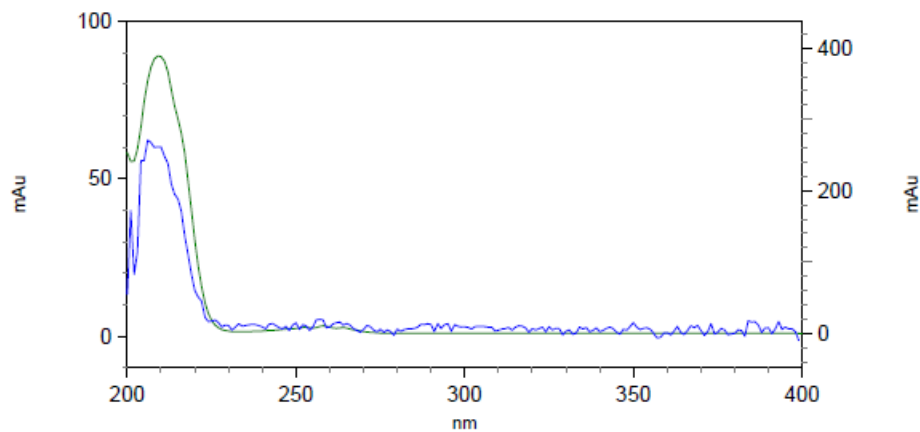

1: 212 nm, 4 nm

Results

| Name | Retention Time | Area Percent | Pk # |
|------|----------------|--------------|------|
|      | 19.256         | 99.516       | 1    |
|      | 22.688         | 0.484        | 2    |

|        |         |
|--------|---------|
| Totals | 100.000 |
|--------|---------|

## checkCIF/PLATON report

Structure factors have been supplied for datablock(s) C15H15NO3S

THIS REPORT IS FOR GUIDANCE ONLY. IF USED AS PART OF A REVIEW PROCEDURE FOR PUBLICATION, IT SHOULD NOT REPLACE THE EXPERTISE OF AN EXPERIENCED CRYSTALLOGRAPHIC REFEREE.

No syntax errors found.    CIF dictionary    Interpreting this report

### Datablock: C15H15NO3S

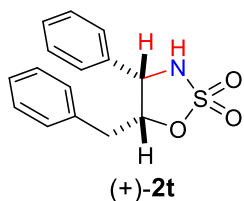

Bond precision: C-C = 0.0037 Å      Wavelength=1.54178  
Cell:                    a=6.1826(3)      b=8.8713(4)      c=24.9596(12)  
                          alpha=90          beta=90          gamma=90  
Temperature:            100 K

|                        | Calculated     | Reported       |
|------------------------|----------------|----------------|
| Volume                 | 1368.98(11)    | 1368.98(11)    |
| Space group            | P 21 21 21     | P 21 21 21     |
| Hall group             | P 2ac 2ab      | P 2ac 2ab      |
| Moiety formula         | C15 H15 N O3 S | C15 H15 N O3 S |
| Sum formula            | C15 H15 N O3 S | C15 H15 N O3 S |
| Mr                     | 289.34         | 289.34         |
| Dx, g cm <sup>-3</sup> | 1.404          | 1.404          |
| Z                      | 4              | 4              |
| Mu (mm <sup>-1</sup> ) | 2.166          | 2.166          |
| F000                   | 608.0          | 608.0          |
| F000'                  | 611.06         |                |
| h, k, lmax             | 7, 10, 29      | 7, 10, 29      |
| Nref                   | 2426[ 1442]    | 2400           |
| Tmin, Tmax             | 0.730, 0.841   | 0.595, 0.753   |
| Tmin'                  | 0.337          |                |

Correction method= # Reported T Limits: Tmin=0.595 Tmax=0.753  
AbsCorr = MULTI-SCAN

Data completeness= 1.66/0.99      Theta(max)= 66.600

R(reflections)= 0.0267( 2353)      wR2(reflections)= 0.0714( 2400)

S = 1.086      Npar= 185

The following ALERTS were generated. Each ALERT has the format  
**test-name\_ALERT\_alert-type\_alert-level.**  
Click on the hyperlinks for more details of the test.



---

**Alert level C**  
PLAT987\_ALERT\_1\_C The Flack x is >> 0 - Do a BASF/TWIN Refinement Please Check

---

**Alert level G**

|                   |                                                  |       |              |
|-------------------|--------------------------------------------------|-------|--------------|
| PLAT002_ALERT_2_G | Number of Distance or Angle Restraints on AtSite | 2     | Note         |
| PLAT033_ALERT_4_G | Flack x Value Deviates > 3.0 * sigma from Zero   | 0.040 | Note         |
| PLAT172_ALERT_4_G | The CIF-Embedded .res File Contains DFIX Records | 1     | Report       |
| PLAT395_ALERT_2_G | Deviating X-O-Y Angle From 120 for O1            | 106.6 | Degree       |
| PLAT432_ALERT_2_G | Short Inter X...Y Contact O2 ..C1                | 3.01  | Ang.         |
| PLAT791_ALERT_4_G | Model has Chirality at C1 (Chiral SPGR)          | R     | Verify       |
| PLAT791_ALERT_4_G | Model has Chirality at C2 (Chiral SPGR)          | S     | Verify       |
| PLAT860_ALERT_3_G | Number of Least-Squares Restraints               | ..... | 1 Note       |
| PLAT909_ALERT_3_G | Percentage of I>2sig(I) Data at Theta(Max) Still | 95%   | Note         |
| PLAT961_ALERT_5_G | Dataset Contains no Negative Intensities         | ..... | Please Check |
| PLAT978_ALERT_2_G | Number C-C Bonds with Positive Residual Density. | 6     | Info         |

---

0 ALERT level A = Most likely a serious problem - resolve or explain  
0 ALERT level B = A potentially serious problem, consider carefully  
1 ALERT level C = Check. Ensure it is not caused by an omission or oversight  
11 ALERT level G = General information/check it is not something unexpected

1 ALERT type 1 CIF construction/syntax error, inconsistent or missing data  
4 ALERT type 2 Indicator that the structure model may be wrong or deficient  
2 ALERT type 3 Indicator that the structure quality may be low  
4 ALERT type 4 Improvement, methodology, query or suggestion  
1 ALERT type 5 Informative message, check

---

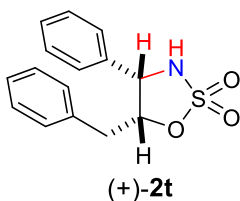

It is advisable to attempt to resolve as many as possible of the alerts in all categories. Often the minor alerts point to easily fixed oversights, errors and omissions in your CIF or refinement strategy, so attention to these fine details can be worthwhile. In order to resolve some of the more serious problems it may be necessary to carry out additional measurements or structure refinements. However, the purpose of your study may justify the reported deviations and the more serious of these should normally be commented upon in the discussion or experimental section of a paper or in the "special\_details" fields of the CIF. checkCIF was carefully designed to identify outliers and unusual parameters, but every test has its limitations and alerts that are not important in a particular case may appear. Conversely, the absence of alerts does not guarantee there are no aspects of the results needing attention. It is up to the individual to critically assess their own results and, if necessary, seek expert advice.

#### Publication of your CIF in IUCr journals

A basic structural check has been run on your CIF. These basic checks will be run on all CIFs submitted for publication in IUCr journals (*Acta Crystallographica*, *Journal of Applied Crystallography*, *Journal of Synchrotron Radiation*); however, if you intend to submit to *Acta Crystallographica Section C* or *E* or *IUCrData*, you should make sure that full publication checks are run on the final version of your CIF prior to submission.

#### Publication of your CIF in other journals

Please refer to the *Notes for Authors* of the relevant journal for any special instructions relating to CIF submission.

PLATON version of 23/04/2018; check.def file version of 23/04/2018

Datablock C15H15NO3S - ellipsoid plot

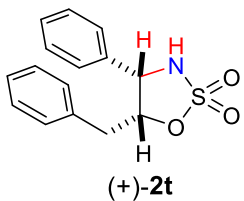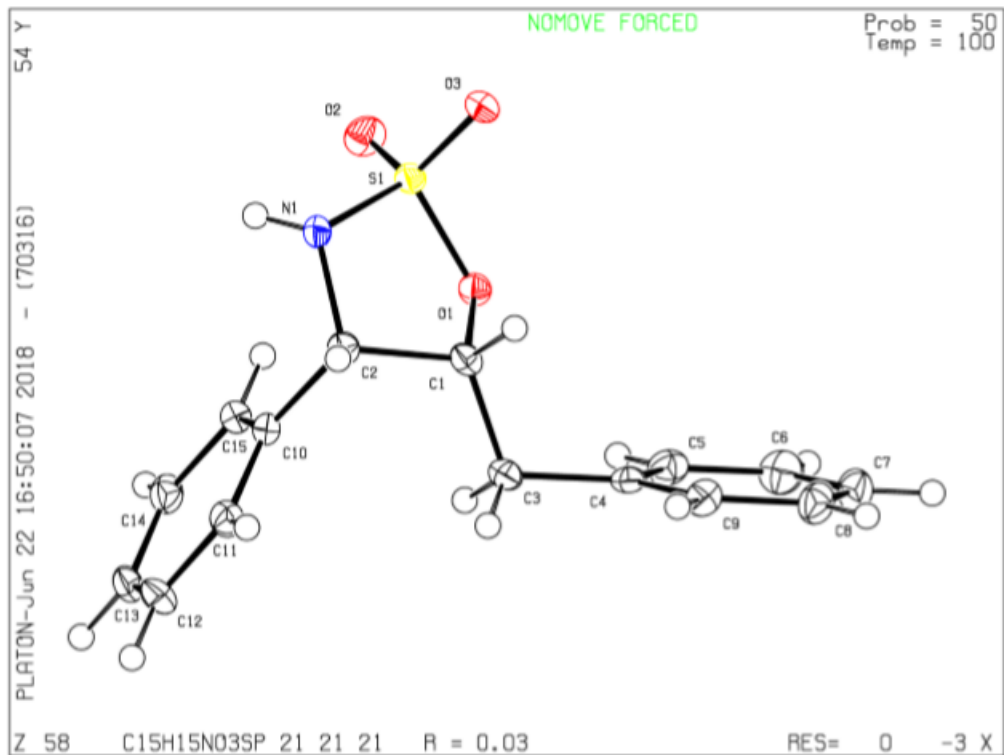

CHCl<sub>3</sub>

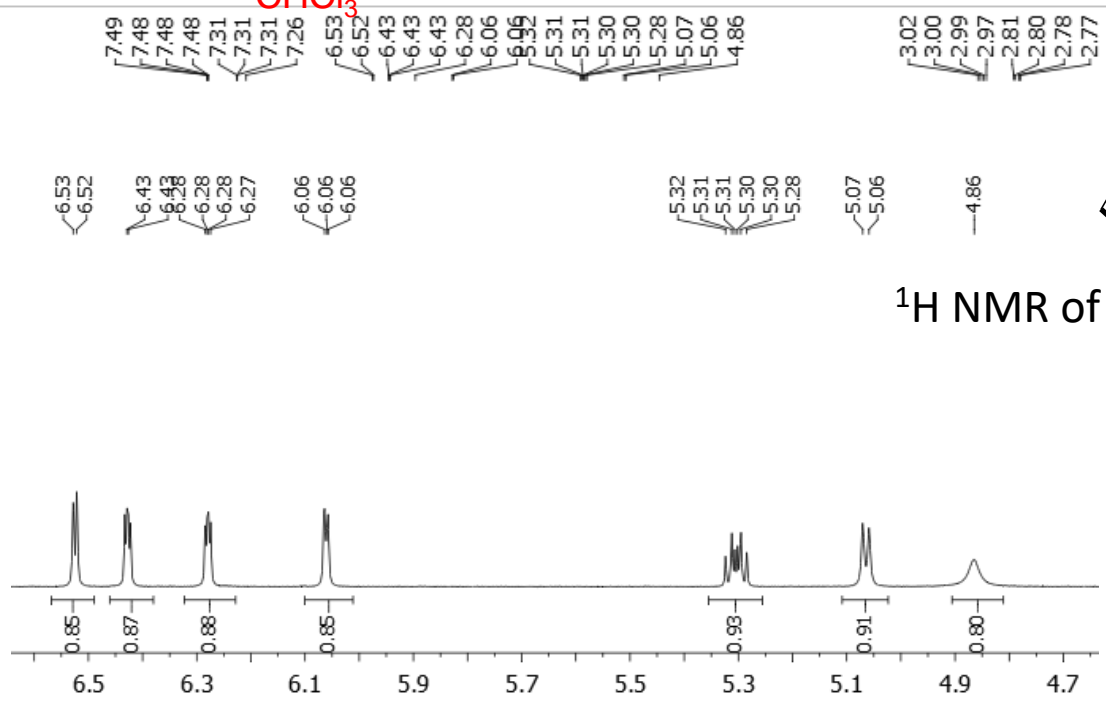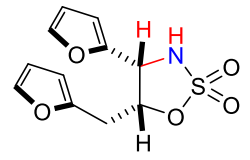

<sup>1</sup>H NMR of **2u**, 500 MHz, CDCl<sub>3</sub>

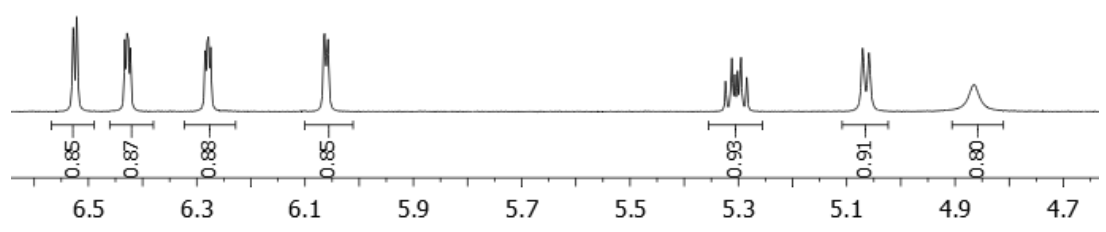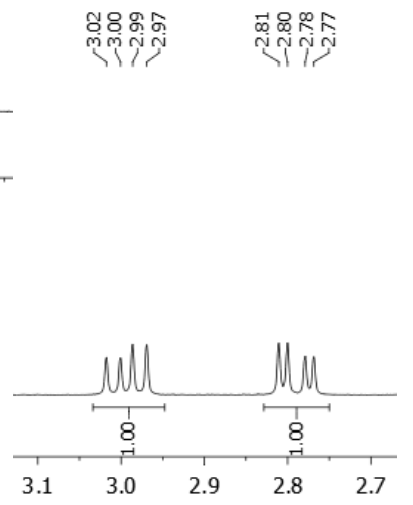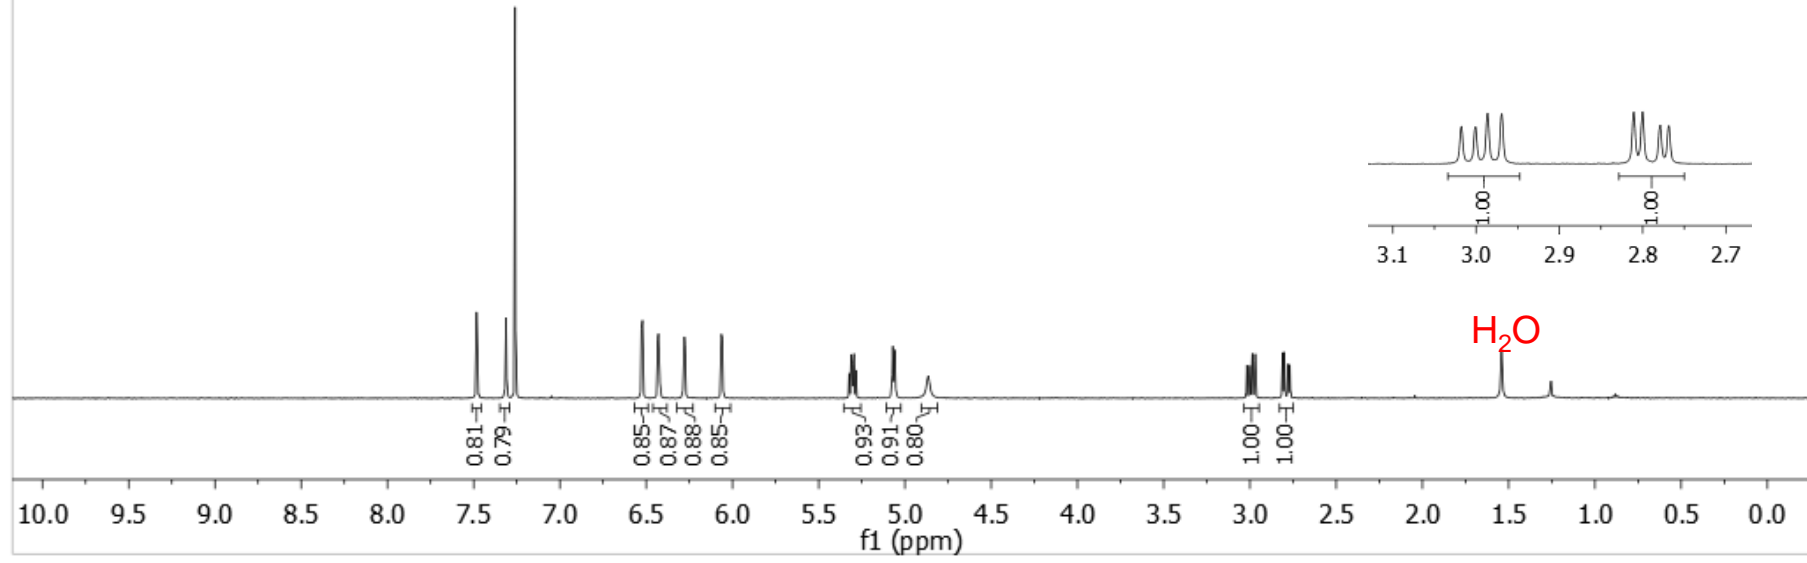

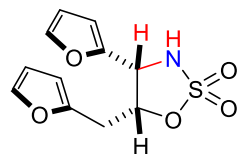

$^{13}\text{C}$  NMR of **2u**, 150 MHz,  $\text{CDCl}_3$

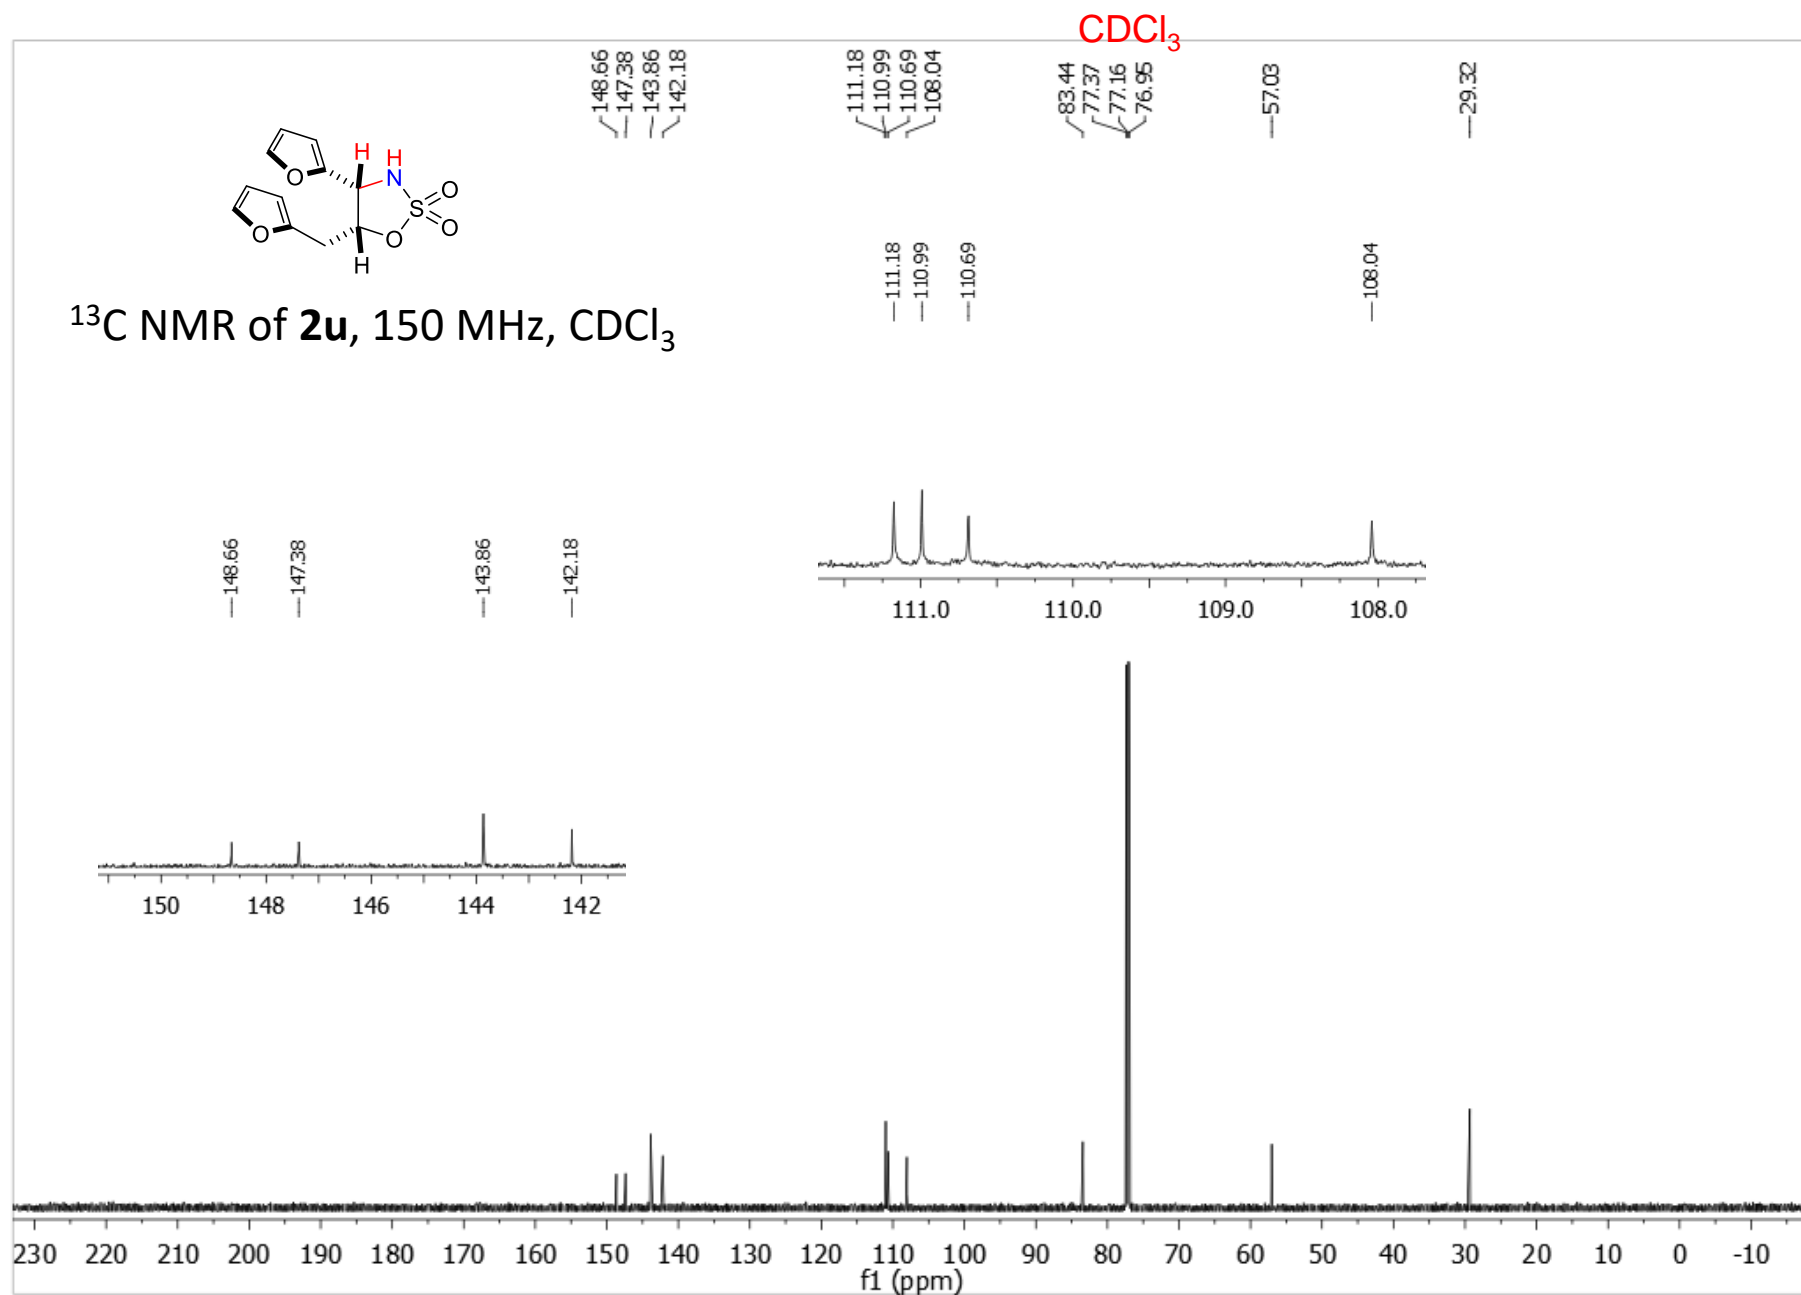

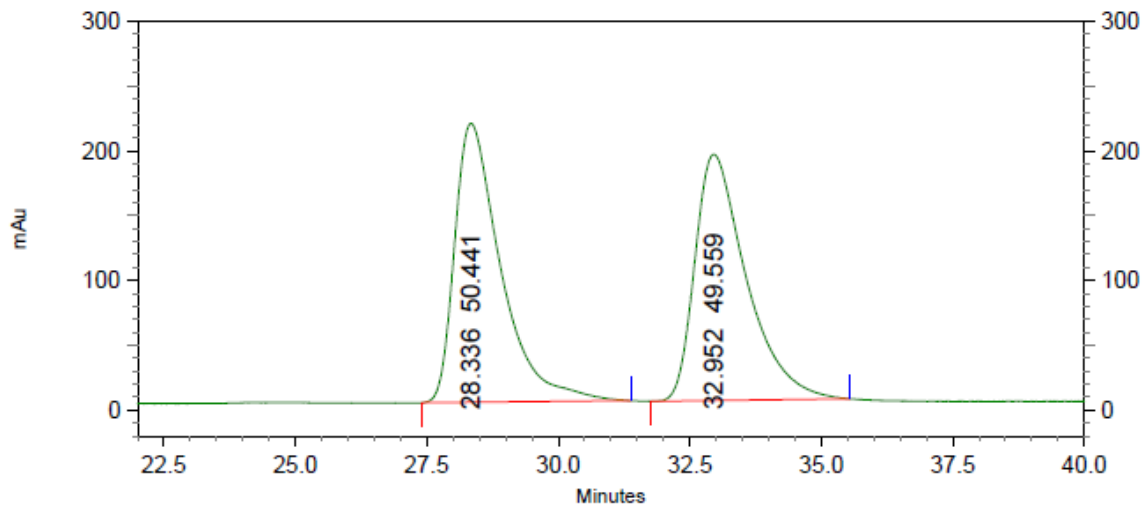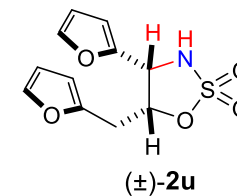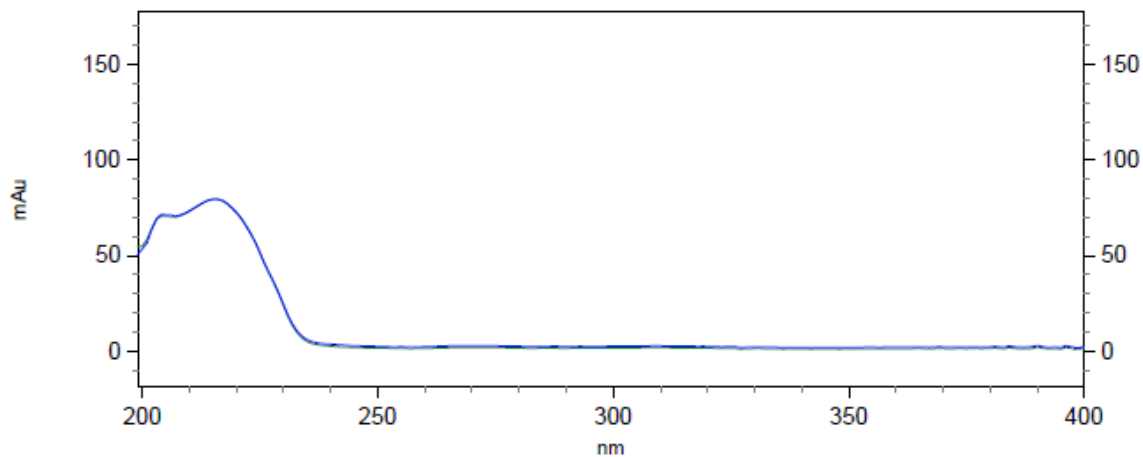

3: 222 nm, 4  
nm Results

| Pk # | Retention Time | Area Percent |
|------|----------------|--------------|
| 1    | 28.336         | 50.441       |
| 2    | 32.952         | 49.559       |

|        |         |
|--------|---------|
| Totals | 100.000 |
|--------|---------|

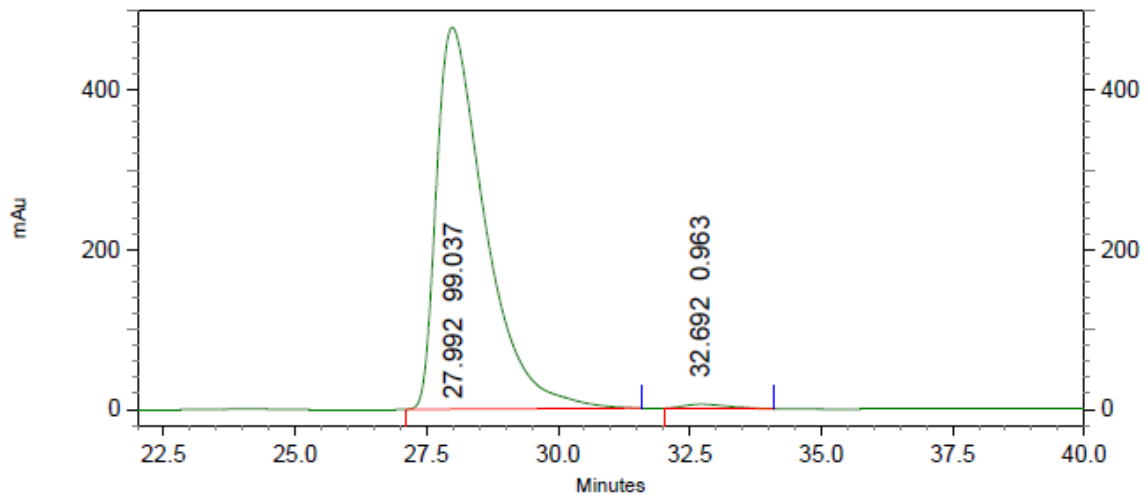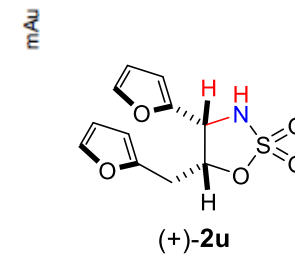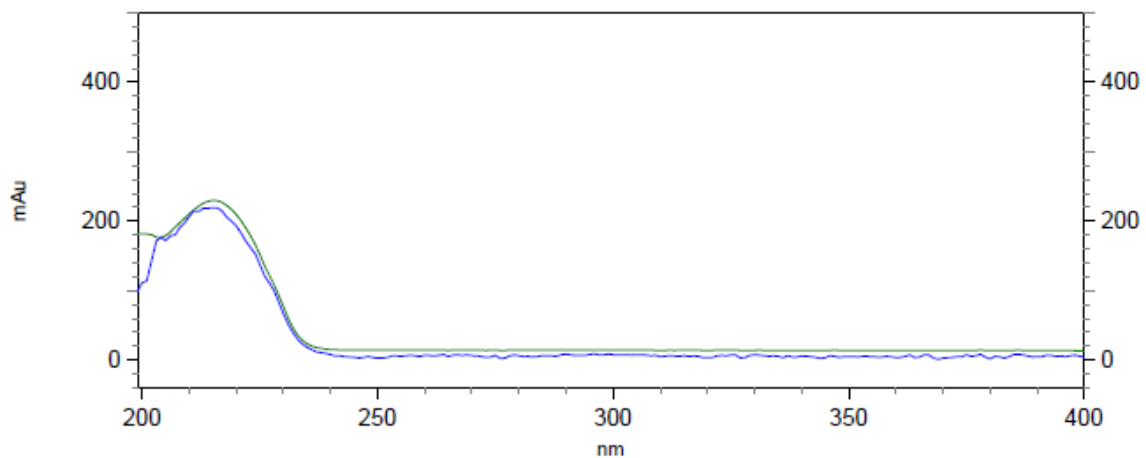

3: 222 nm, 4  
nm Results

| Pk # | Retention Time | Area Percent |
|------|----------------|--------------|
| 1    | 27.992         | 99.037       |
| 2    | 32.692         | 0.963        |

|        |         |
|--------|---------|
| Totals | 100.000 |
|--------|---------|

## checkCIF/PLATON report

Structure factors have been supplied for datablock(s) C11H11NO5S

THIS REPORT IS FOR GUIDANCE ONLY. IF USED AS PART OF A REVIEW PROCEDURE FOR PUBLICATION, IT SHOULD NOT REPLACE THE EXPERTISE OF AN EXPERIENCED CRYSTALLOGRAPHIC REFEREE.

No syntax errors found. CIF dictionary Interpreting this report

### Datablock: C11H11NO5S

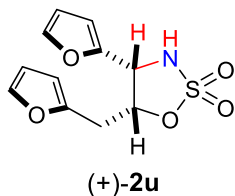

Bond precision: C-C = 0.0061 Å

Wavelength=1.54178

Cell: a=17.9291(12) b=5.4403(4) c=14.8271(9)

alpha=90 beta=124.469(3) gamma=90

Temperature: 123 K

|                        | Calculated     | Reported       |
|------------------------|----------------|----------------|
| Volume                 | 1192.32(15)    | 1192.32(14)    |
| Space group            | C 2            | C 2            |
| Hall group             | C 2y           | C 2y           |
| Moiety formula         | C11 H11 N O5 S | C11 H11 N O5 S |
| Sum formula            | C11 H11 N O5 S | C11 H11 N O5 S |
| Mr                     | 269.27         | 269.27         |
| Dx, g cm <sup>-3</sup> | 1.500          | 1.500          |
| Z                      | 4              | 4              |
| Mu (mm <sup>-1</sup> ) | 2.569          | 2.569          |
| F000                   | 560.0          | 560.0          |
| F000'                  | 563.18         |                |
| h, k, lmax             | 21, 6, 17      | 21, 6, 17      |
| Nref                   | 2117[ 1181]    | 2078           |
| Tmin, Tmax             | 0.725, 0.773   | 0.551, 0.753   |
| Tmin'                  | 0.278          |                |

Correction method= # Reported T Limits: Tmin=0.551 Tmax=0.753

AbsCorr = MULTI-SCAN

Data completeness= 1.76/0.98

Theta(max)= 66.693

R(reflections)= 0.0377( 2048)

wR2(reflections)= 0.1046( 2078)

S = 1.105

Npar= 166

The following ALERTS were generated. Each ALERT has the format

**test-name\_ALERT\_alert-type\_alert-level.**

Click on the hyperlinks for more details of the test.

| Alert level C     |                                               |             |
|-------------------|-----------------------------------------------|-------------|
| PLAT089_ALERT_3_C | Poor Data / Parameter Ratio (Zmax < 18) ..... | 7.11 Note   |
| PLAT340_ALERT_3_C | Low Bond Precision on C-C Bonds .....         | 0.0061 Ang. |

| Alert level G     |                                                  |              |
|-------------------|--------------------------------------------------|--------------|
| PLAT002_ALERT_2_G | Number of Distance or Angle Restraints on AtSite | 2 Note       |
| PLAT128_ALERT_4_G | Alternate Setting for Input Space Group C2       | I2 Note      |
| PLAT172_ALERT_4_G | The CIF-Embedded .res File Contains DFIX Records | 1 Report     |
| PLAT395_ALERT_2_G | Deviating X-O-Y Angle From 120 for O1            | 109.0 Degree |
| PLAT398_ALERT_2_G | Deviating C-O-C Angle From 120 for O4            | 106.1 Degree |
| PLAT398_ALERT_2_G | Deviating C-O-C Angle From 120 for O5            | 106.3 Degree |
| PLAT791_ALERT_4_G | Model has Chirality at C1 (Chiral SPGR)          | R Verify     |
| PLAT791_ALERT_4_G | Model has Chirality at C2 (Chiral SPGR)          | R Verify     |
| PLAT860_ALERT_3_G | Number of Least-Squares Restraints .....         | 2 Note       |

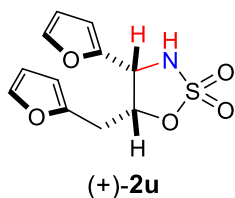

- 0 ALERT level A = Most likely a serious problem - resolve or explain  
 0 ALERT level B = A potentially serious problem, consider carefully  
 2 ALERT level C = Check. Ensure it is not caused by an omission or oversight  
 9 ALERT level G = General information/check it is not something unexpected
- 0 ALERT type 1 CIF construction/syntax error, inconsistent or missing data  
 4 ALERT type 2 Indicator that the structure model may be wrong or deficient  
 3 ALERT type 3 Indicator that the structure quality may be low  
 4 ALERT type 4 Improvement, methodology, query or suggestion  
 0 ALERT type 5 Informative message, check

It is advisable to attempt to resolve as many as possible of the alerts in all categories. Often the minor alerts point to easily fixed oversights, errors and omissions in your CIF or refinement strategy, so attention to these fine details can be worthwhile. In order to resolve some of the more serious problems it may be necessary to carry out additional measurements or structure refinements. However, the purpose of your study may justify the reported deviations and the more serious of these should normally be commented upon in the discussion or experimental section of a paper or in the "special\_details" fields of the CIF. checkCIF was carefully designed to identify outliers and unusual parameters, but every test has its limitations and alerts that are not important in a particular case may appear. Conversely, the absence of alerts does not guarantee there are no aspects of the results needing attention. It is up to the individual to critically assess their own results and, if necessary, seek expert advice.

#### Publication of your CIF in IUCr journals

A basic structural check has been run on your CIF. These basic checks will be run on all CIFs submitted for publication in IUCr journals (*Acta Crystallographica*, *Journal of Applied Crystallography*, *Journal of Synchrotron Radiation*); however, if you intend to submit to *Acta Crystallographica Section C* or *E* or *IUCrData*, you should make sure that full publication checks are run on the final version of your CIF prior to submission.

#### Publication of your CIF in other journals

Please refer to the *Notes for Authors* of the relevant journal for any special instructions relating to CIF submission.



PLATON version of 18/02/2019; check.def file version of 18/02/2019

Datablock C11H11NO5S - ellipsoid plot

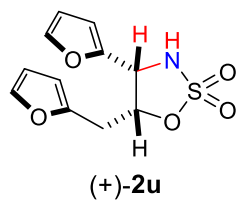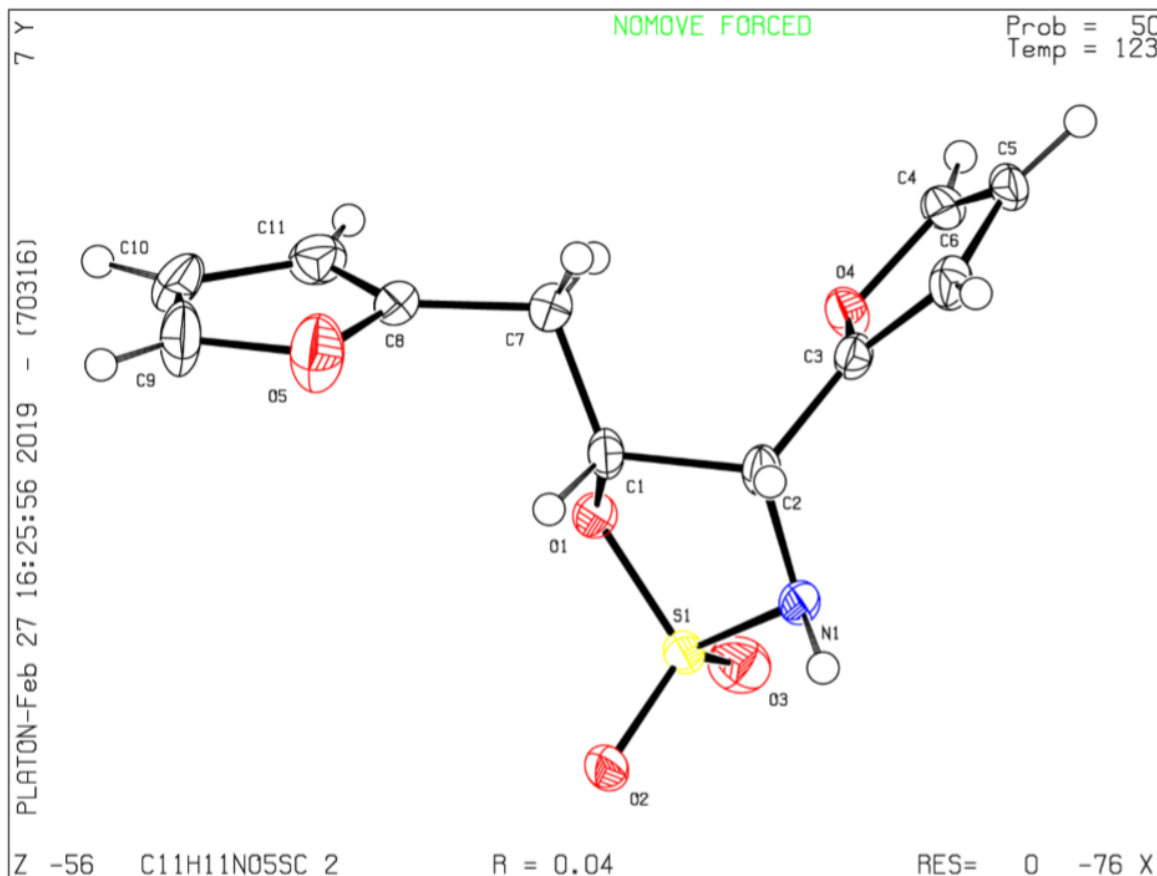

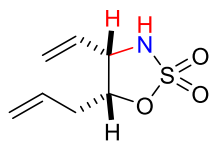

$^1\text{H}$  NMR of **2v**, 500 MHz,  $\text{CDCl}_3$

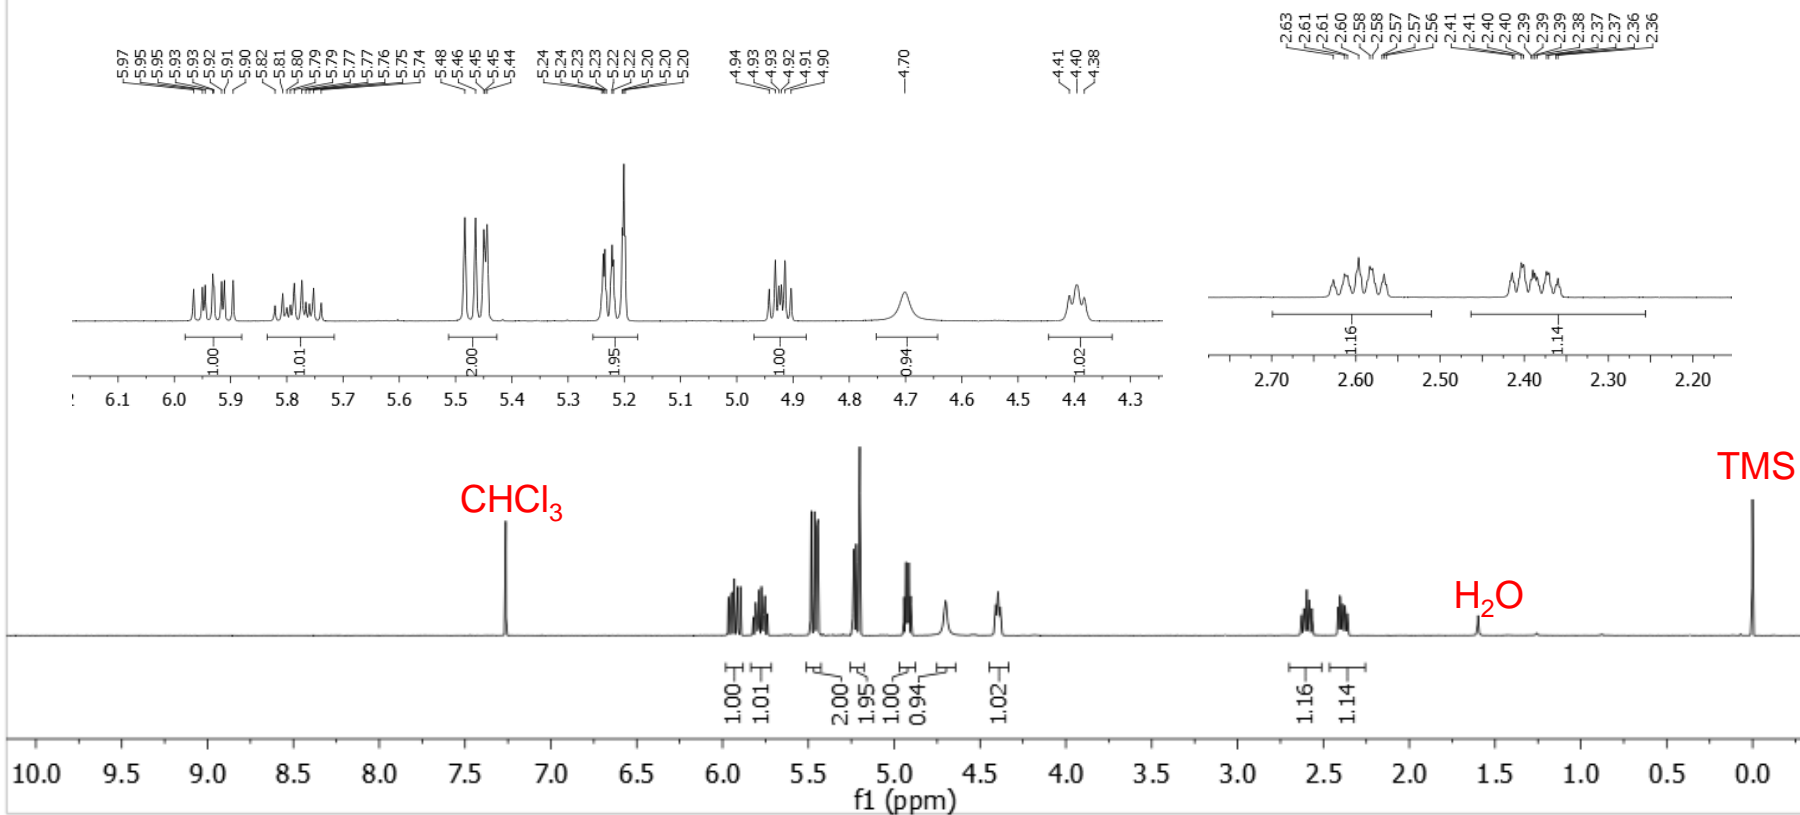



$^{13}\text{C}$  NMR of **2v**, 150 MHz,  $\text{CDCl}_3$

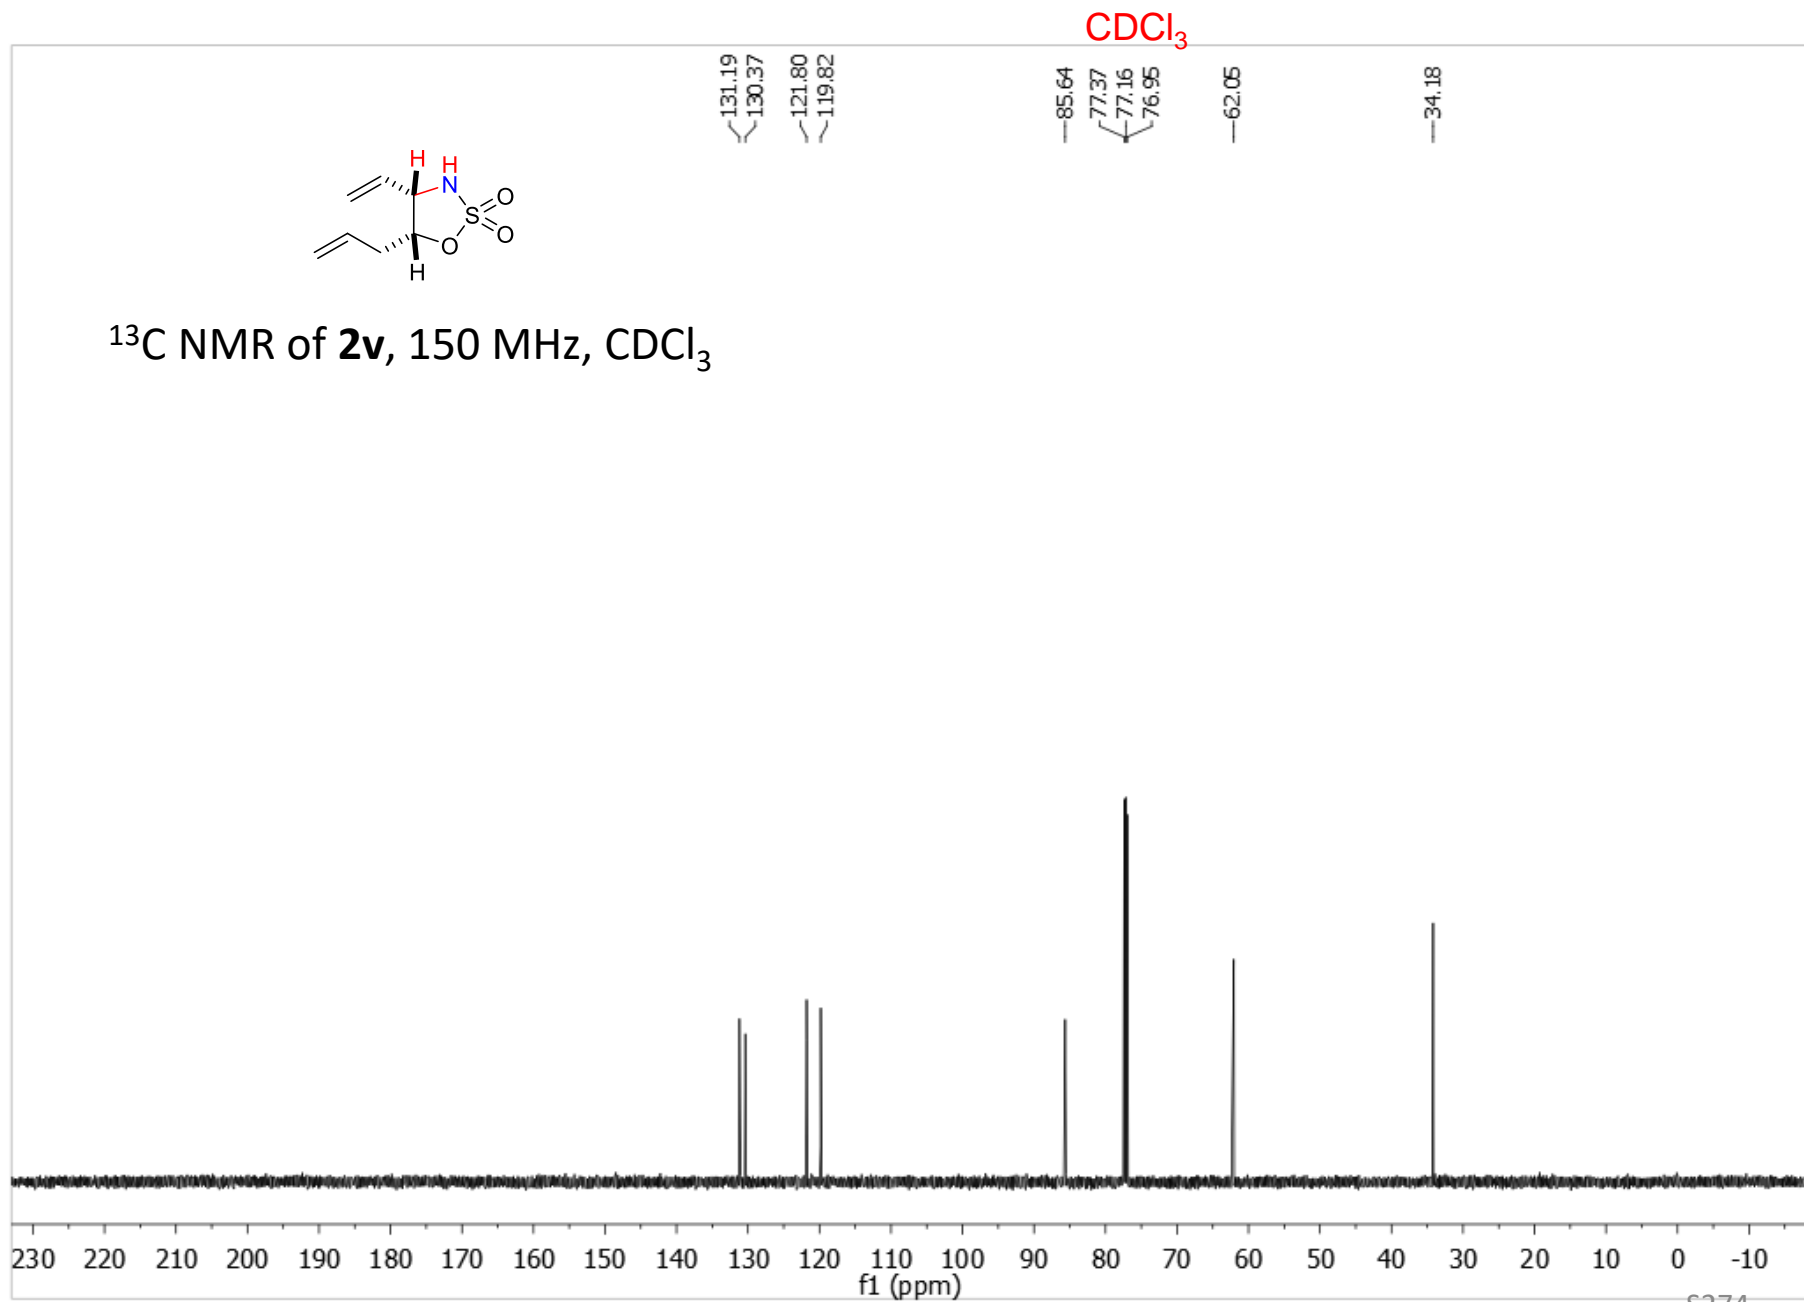

CHCl<sub>3</sub>

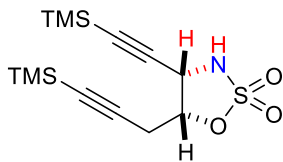

<sup>1</sup>H NMR of **2w**, 600 MHz, CDCl<sub>3</sub>

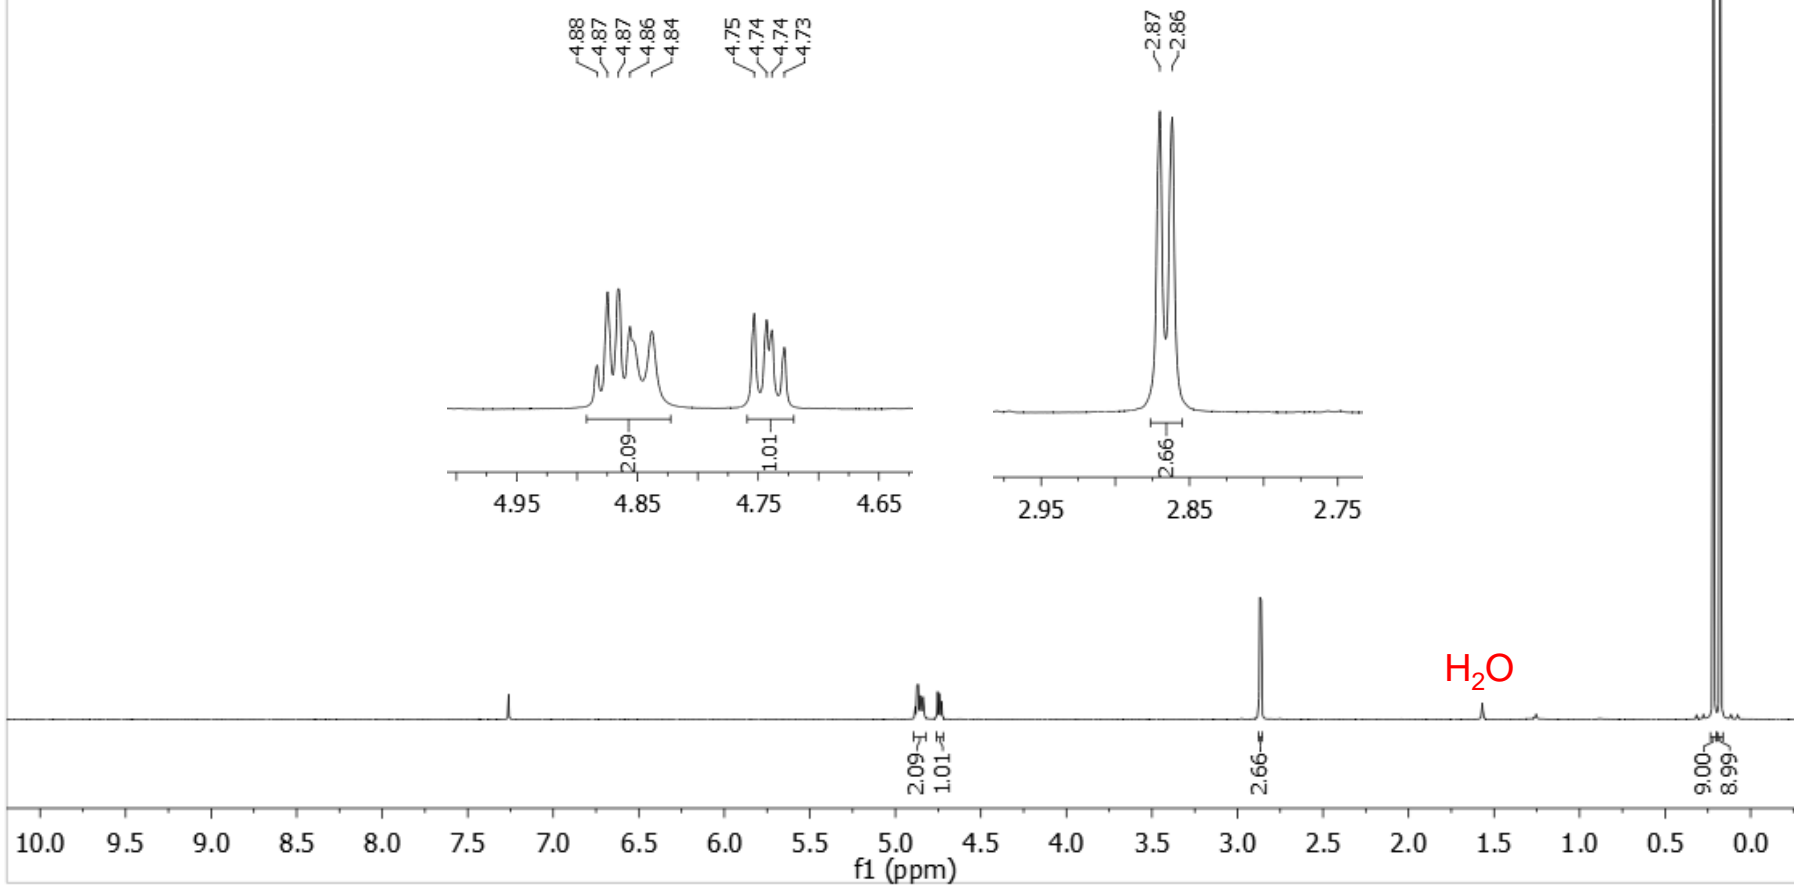

$\text{CDCl}_3$

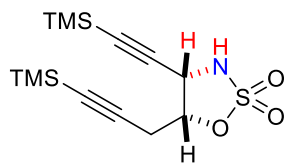

$^{13}\text{C}$  NMR of **2w**, 150 MHz,  $\text{CDCl}_3$

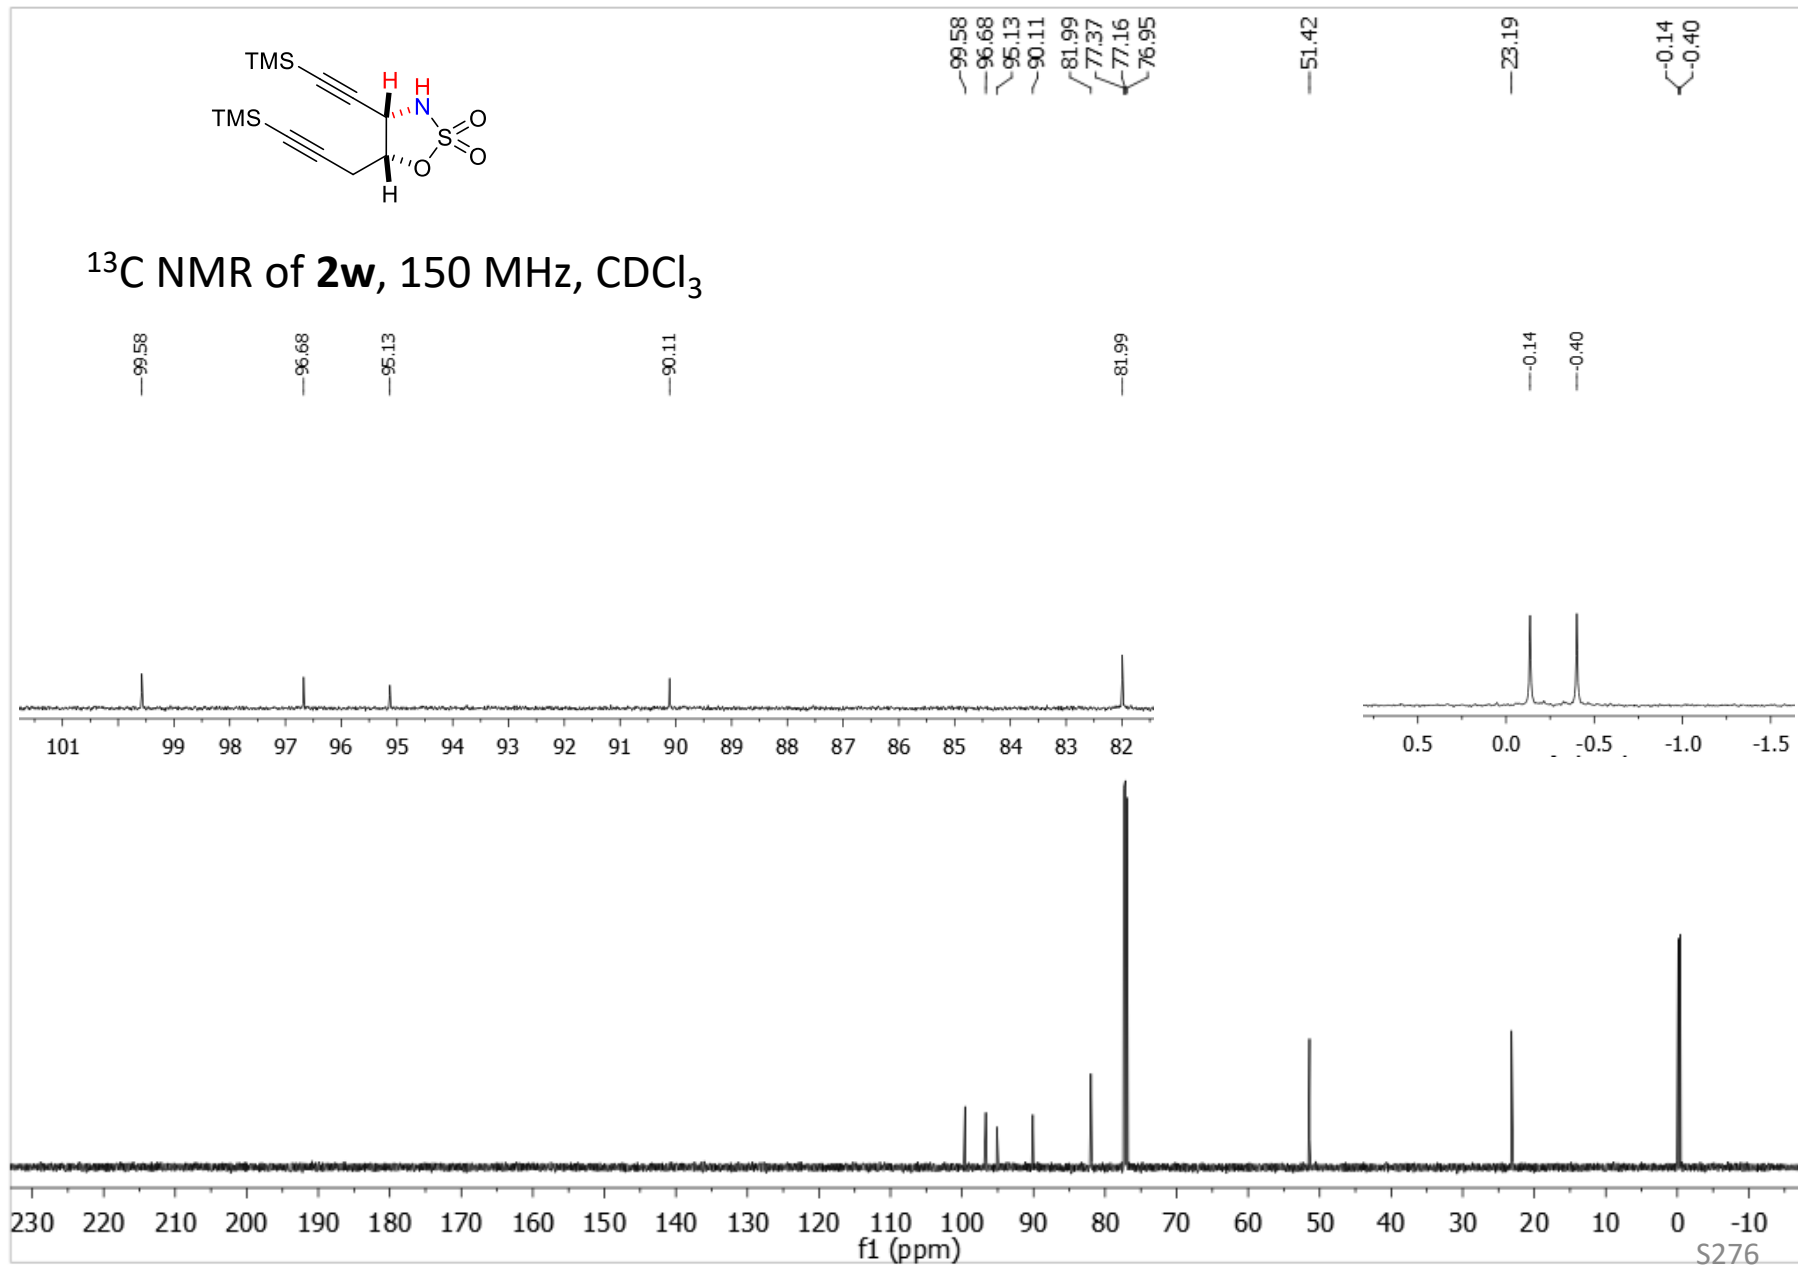

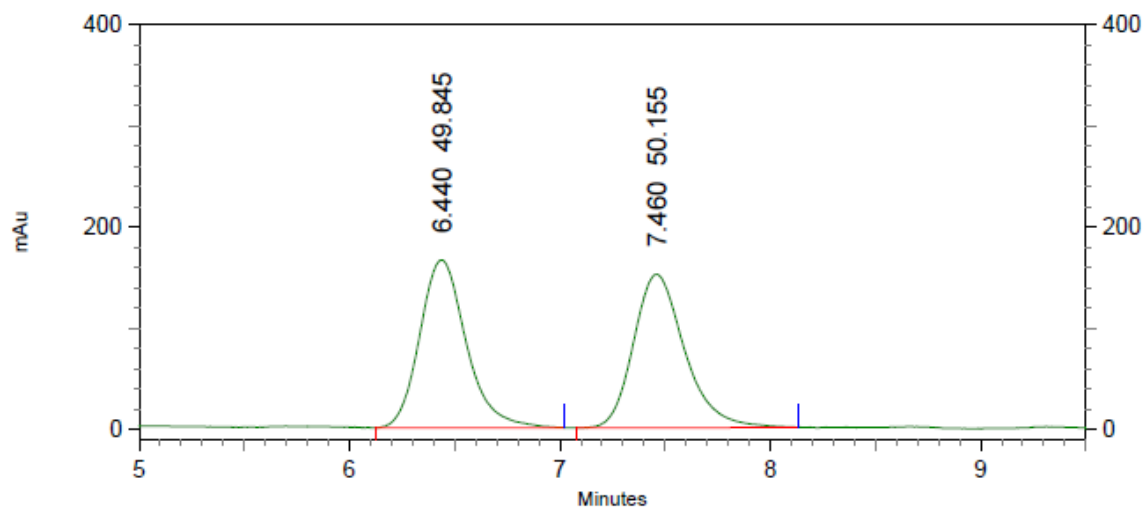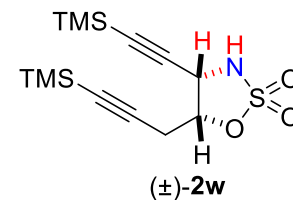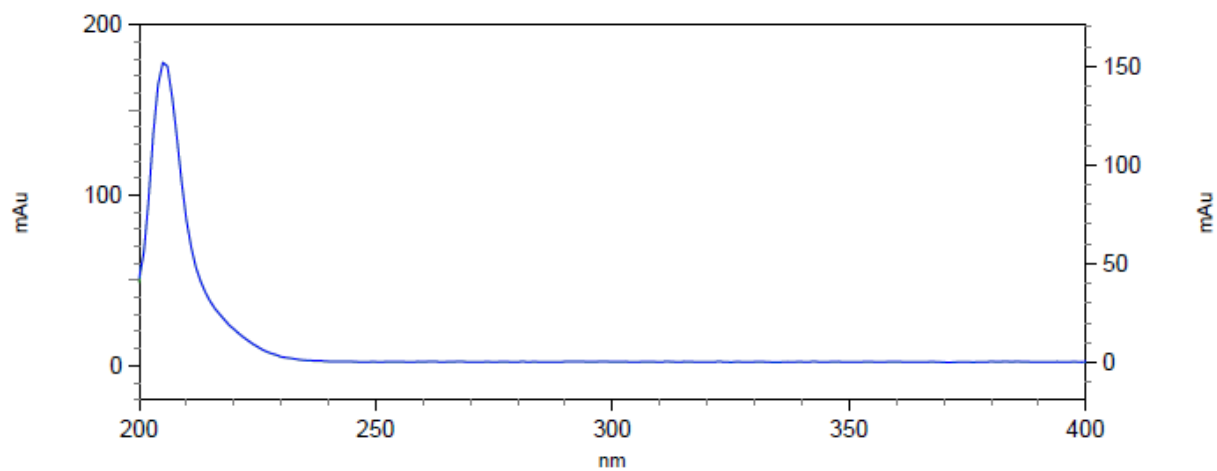

3: 210 nm, 4  
nm Results

| Pk # | Retention Time | Area Percent |
|------|----------------|--------------|
| 1    | 6.440          | 49.845       |
| 2    | 7.460          | 50.155       |

|        |  |         |
|--------|--|---------|
| Totals |  | 100.000 |
|--------|--|---------|

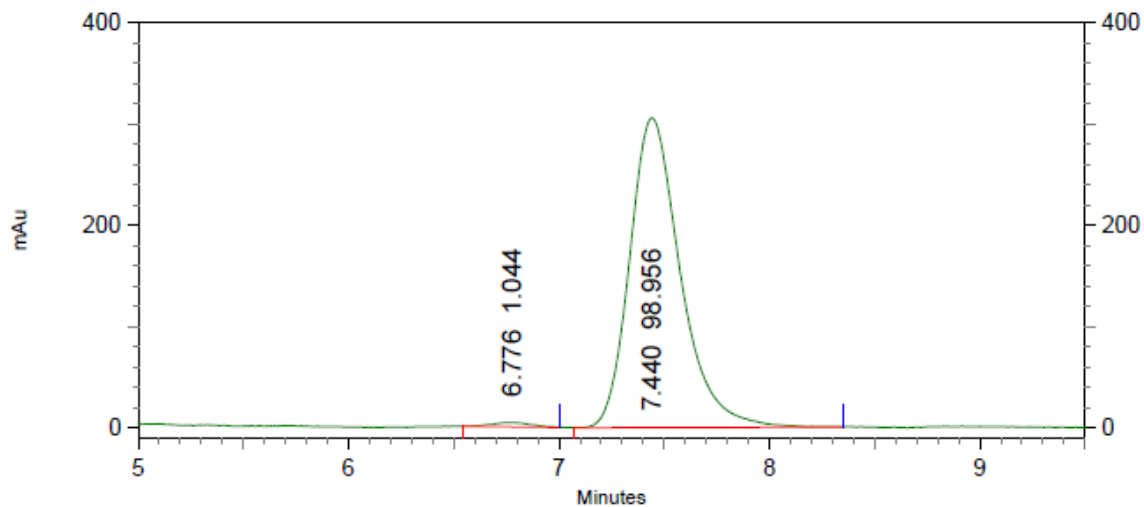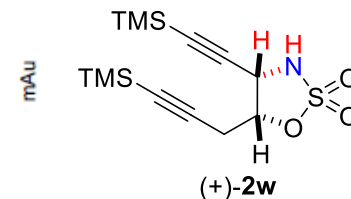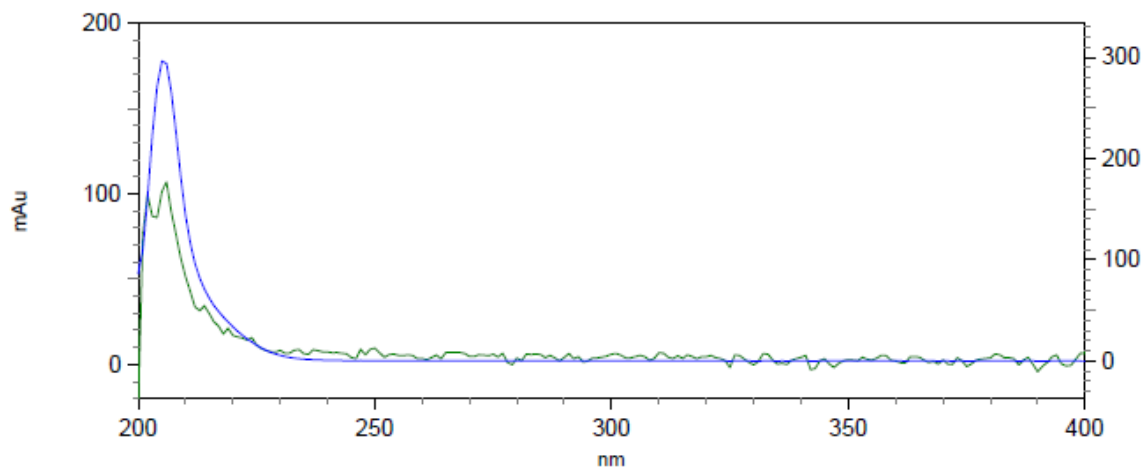

3: 210 nm, 4  
nm Results

| Pk # | Retention Time | Area Percent |
|------|----------------|--------------|
| 1    | 6.776          | 1.044        |
| 2    | 7.440          | 98.956       |

|        |         |
|--------|---------|
| Totals | 100.000 |
|--------|---------|

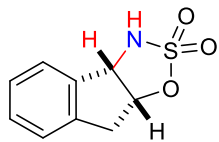

$^1\text{H}$  NMR of **2x**, 500 MHz,  
Acetone- $D_6$

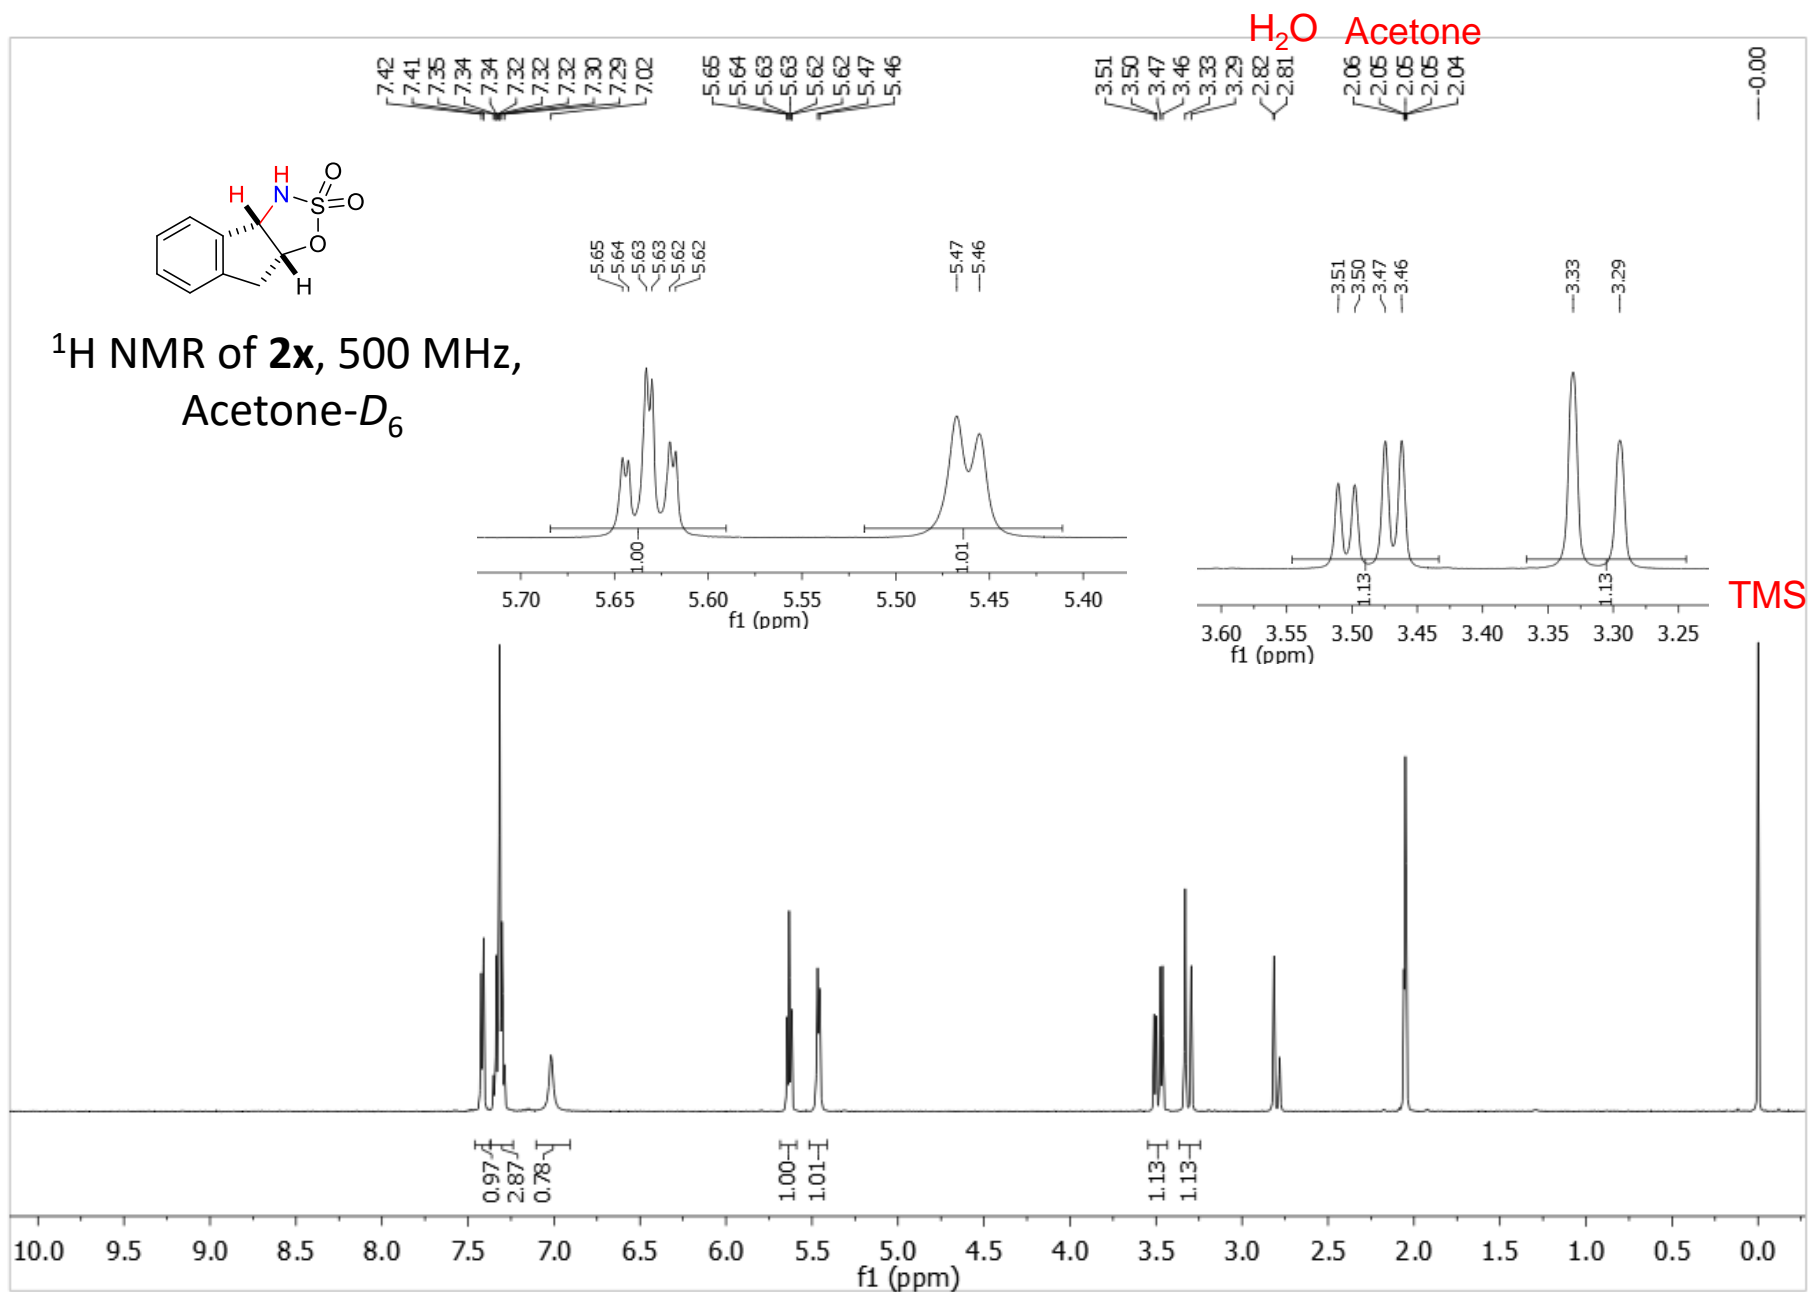



Acetone- $D_6$

Acetone- $D_6$

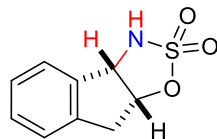

$^1\text{H}$  NMR of **2x**, 150 MHz,  
Acetone- $D_6$

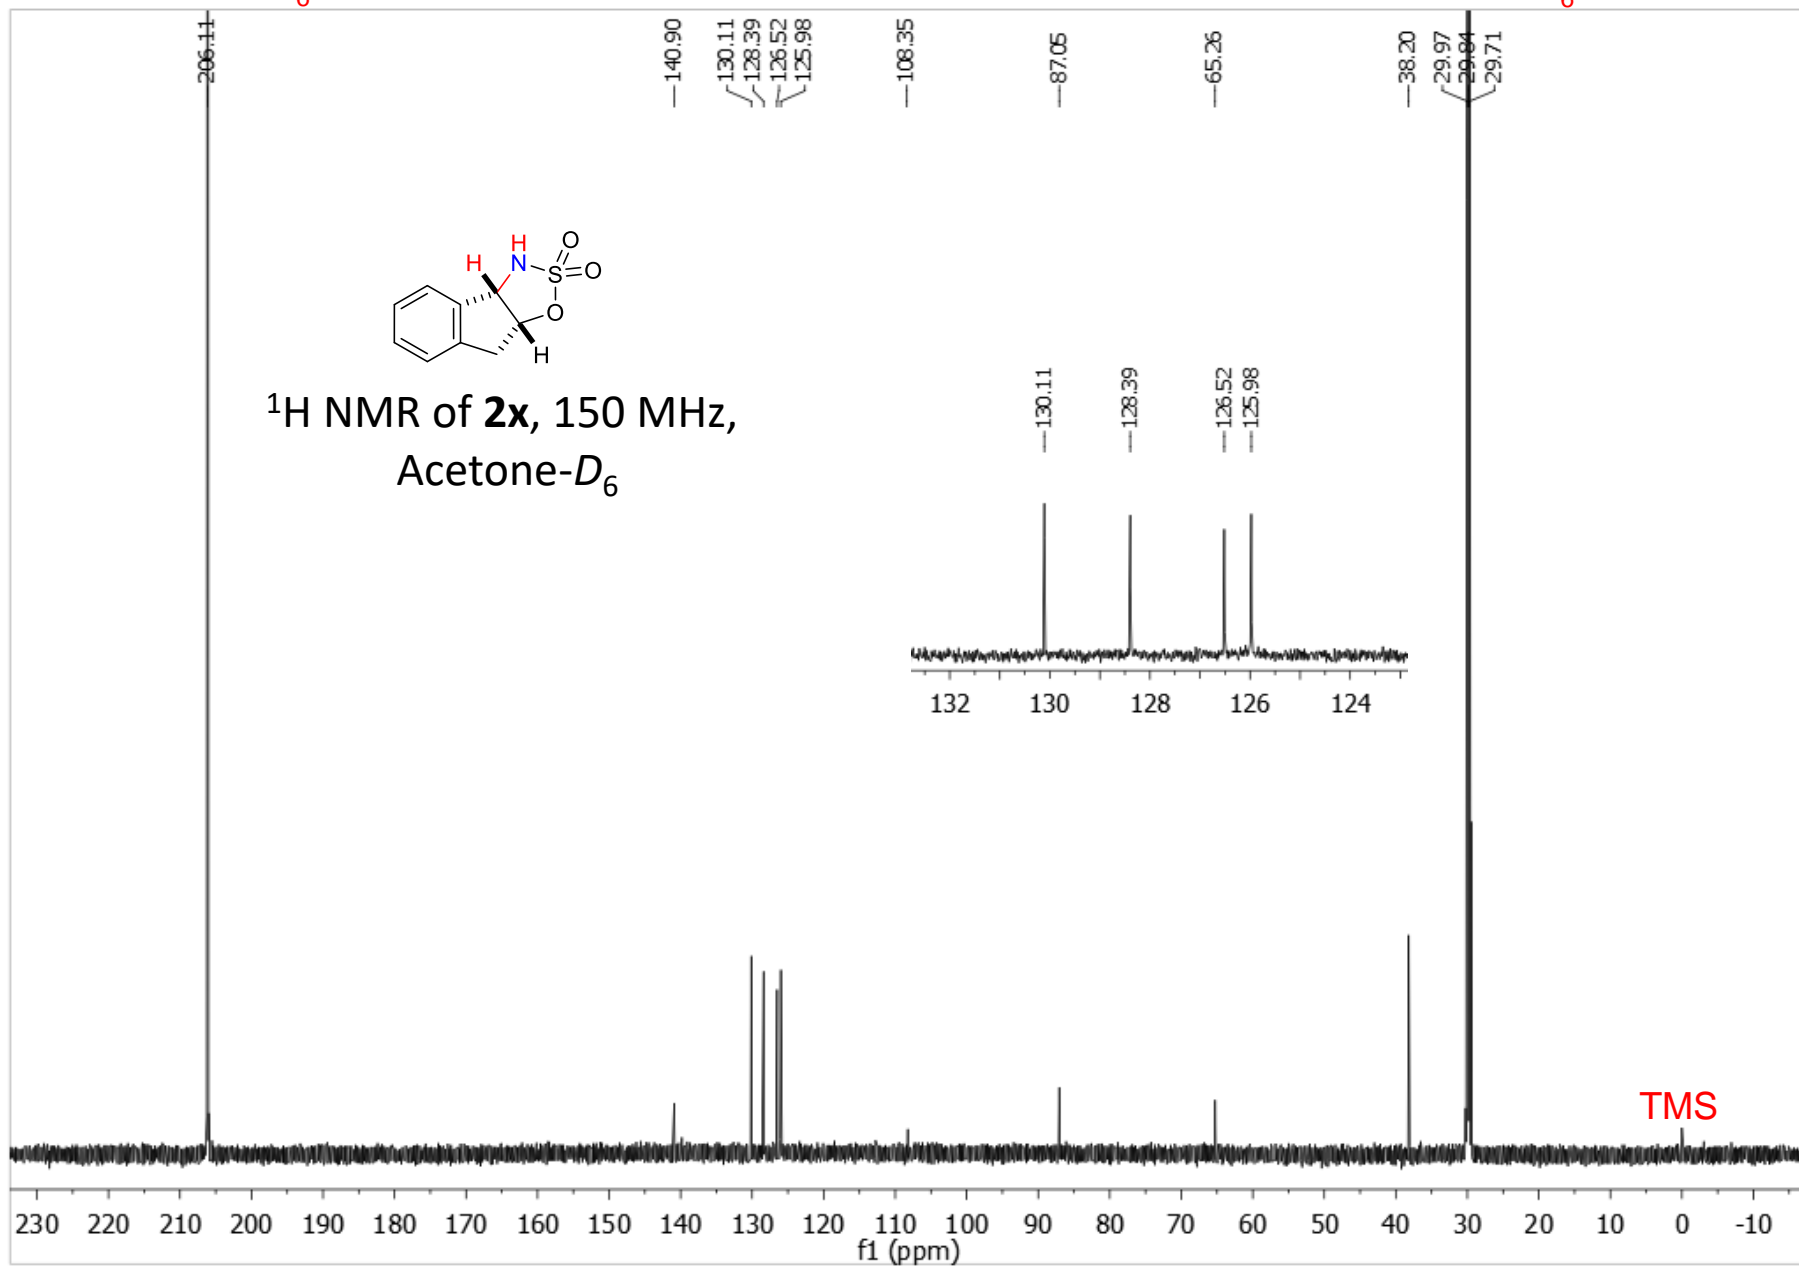

K0L-361-ODH-10%

C:\EZStart\Projects\Default\Method\1k7%1.0.met

C:\EZStart\Projects\Default\Data\K0L-361-ODH-10%

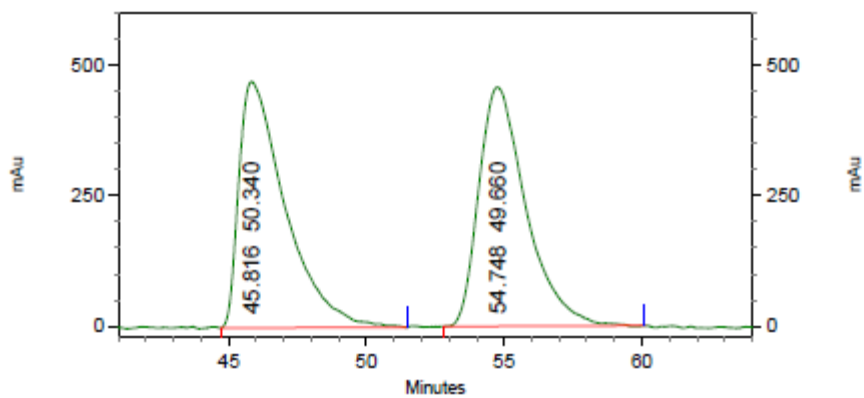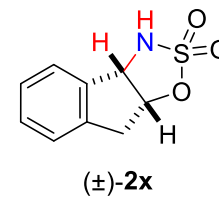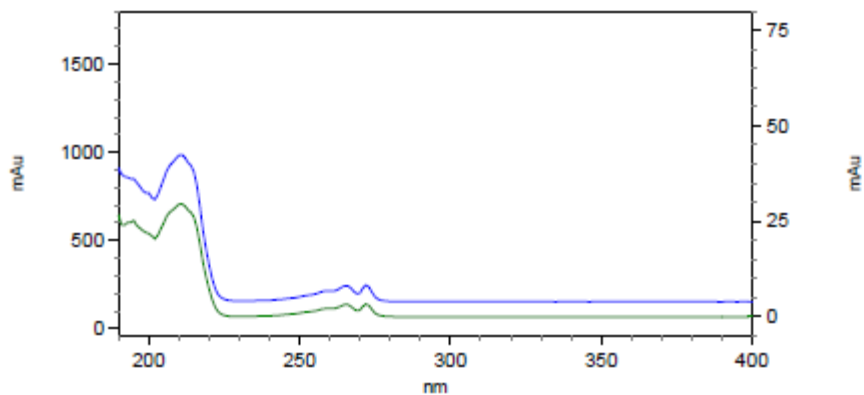

4: 208 nm, 4 nm

Results

| Name | Retention Time | Area Percent | Pk # |
|------|----------------|--------------|------|
|      | 45.816         | 50.340       | 1    |
|      | 54.748         | 49.660       | 2    |

Totals

100.000

K0L-360-ODH-10%

C:\EZStart\Projects\Default\Method\lk7%1.0.met

C:\EZStart\Projects\Default\Data\K0L-360-ODH-10%

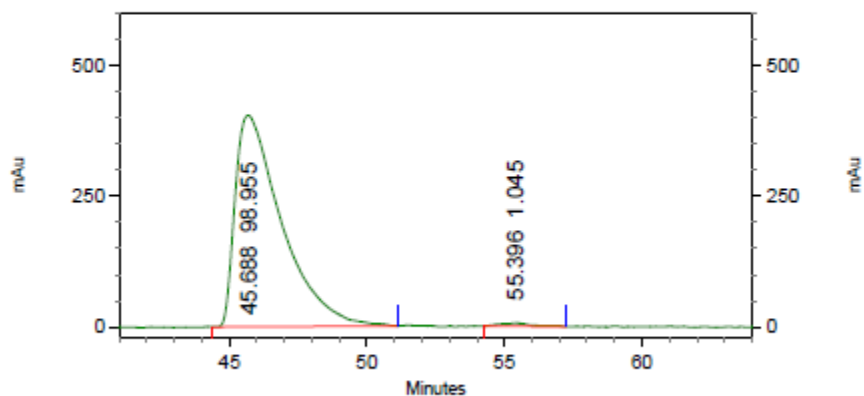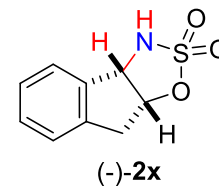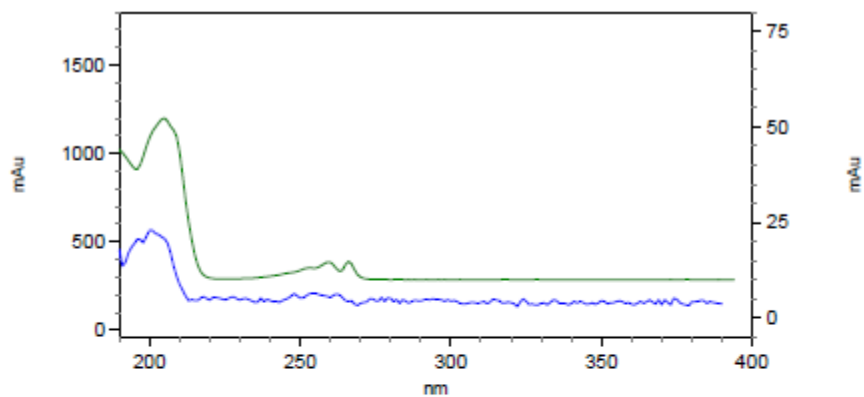

4: 208 nm, 4 nm

Results

| Name | Retention Time | Area Percent | Pk # |
|------|----------------|--------------|------|
|      | 45.688         | 98.955       | 1    |
|      | 55.396         | 1.045        | 2    |

Totals

100.000

CHCl<sub>3</sub>

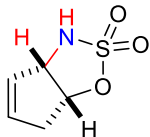

<sup>1</sup>H NMR of **2y**, 400 MHz, CDCl<sub>3</sub>

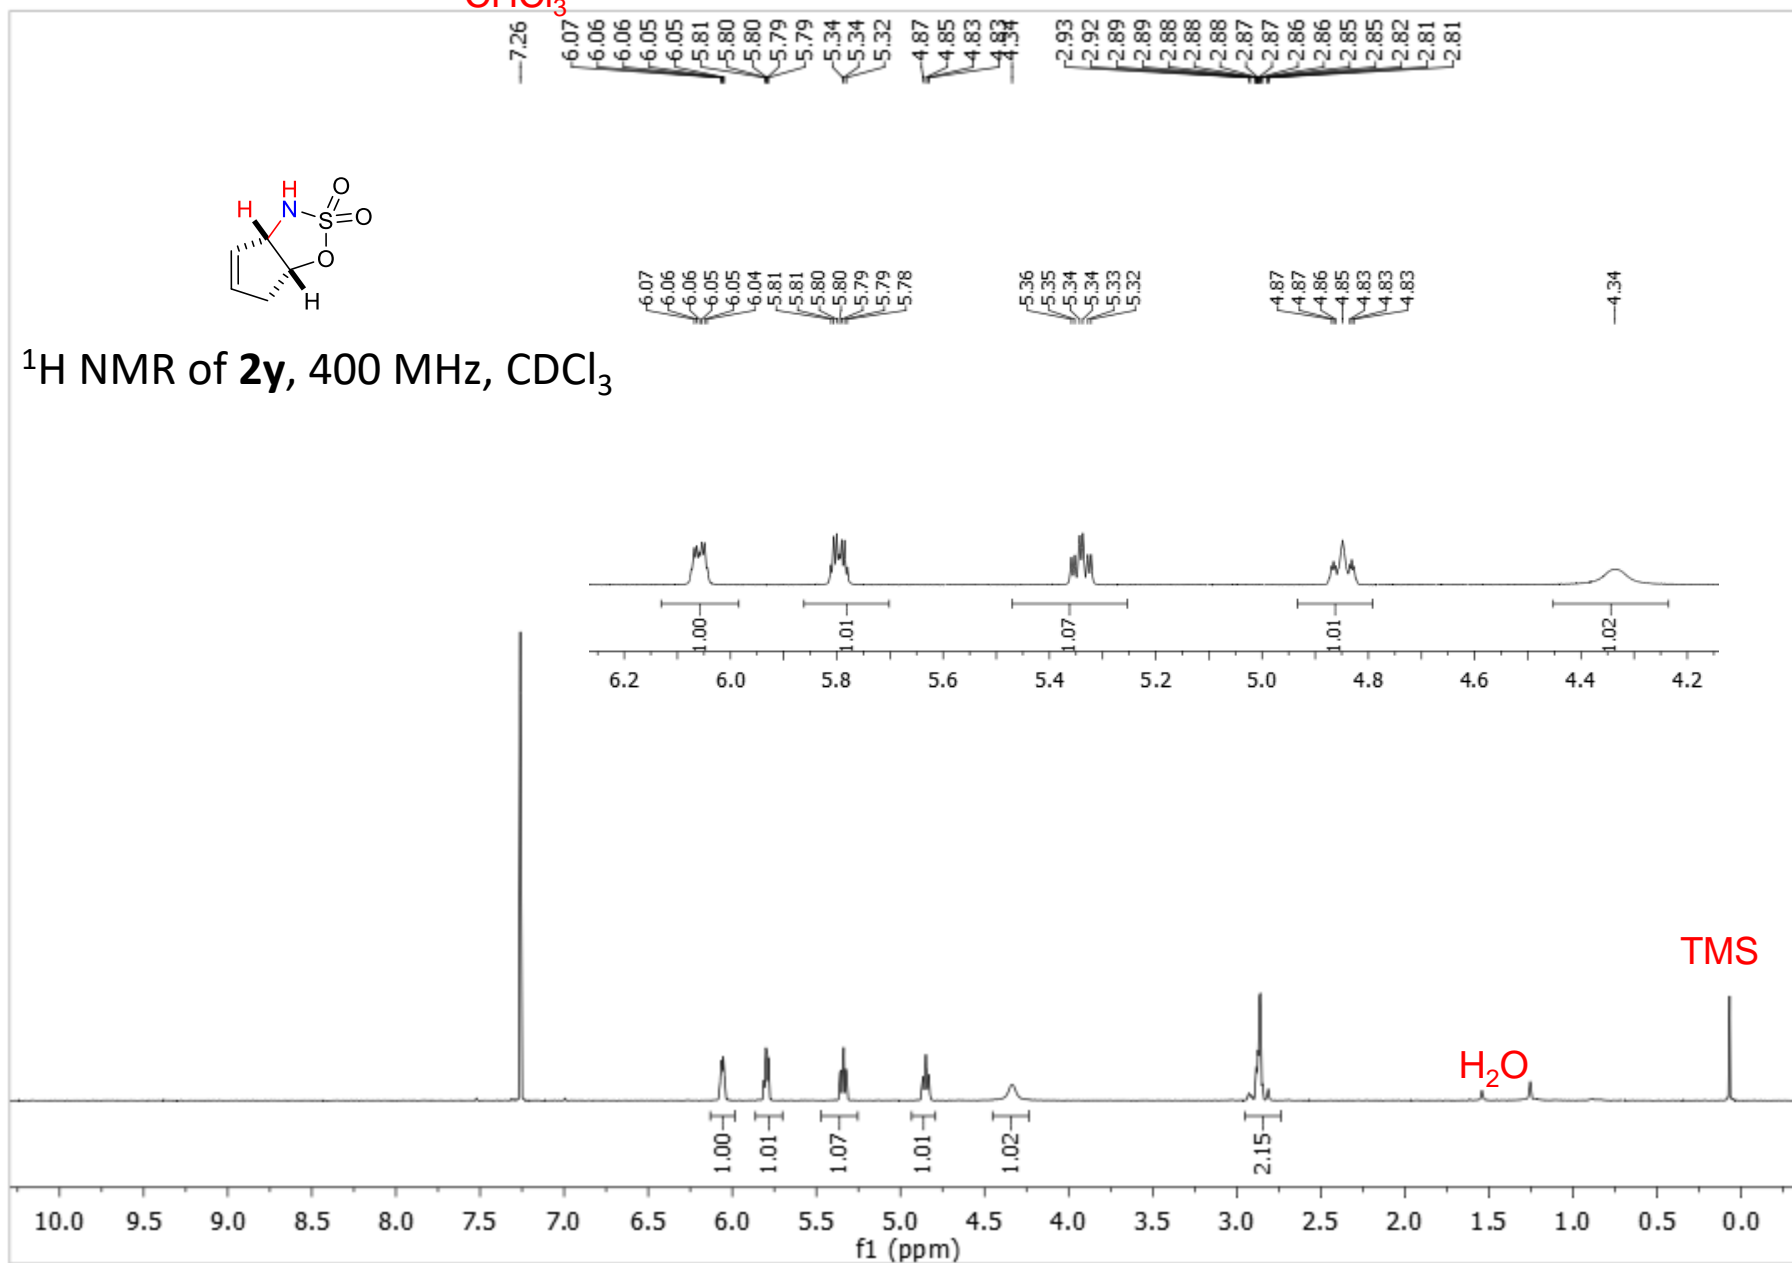

TMS

H<sub>2</sub>O

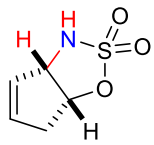

$^{13}\text{C}$  NMR of **2y**, 125 MHz,  $\text{CDCl}_3$

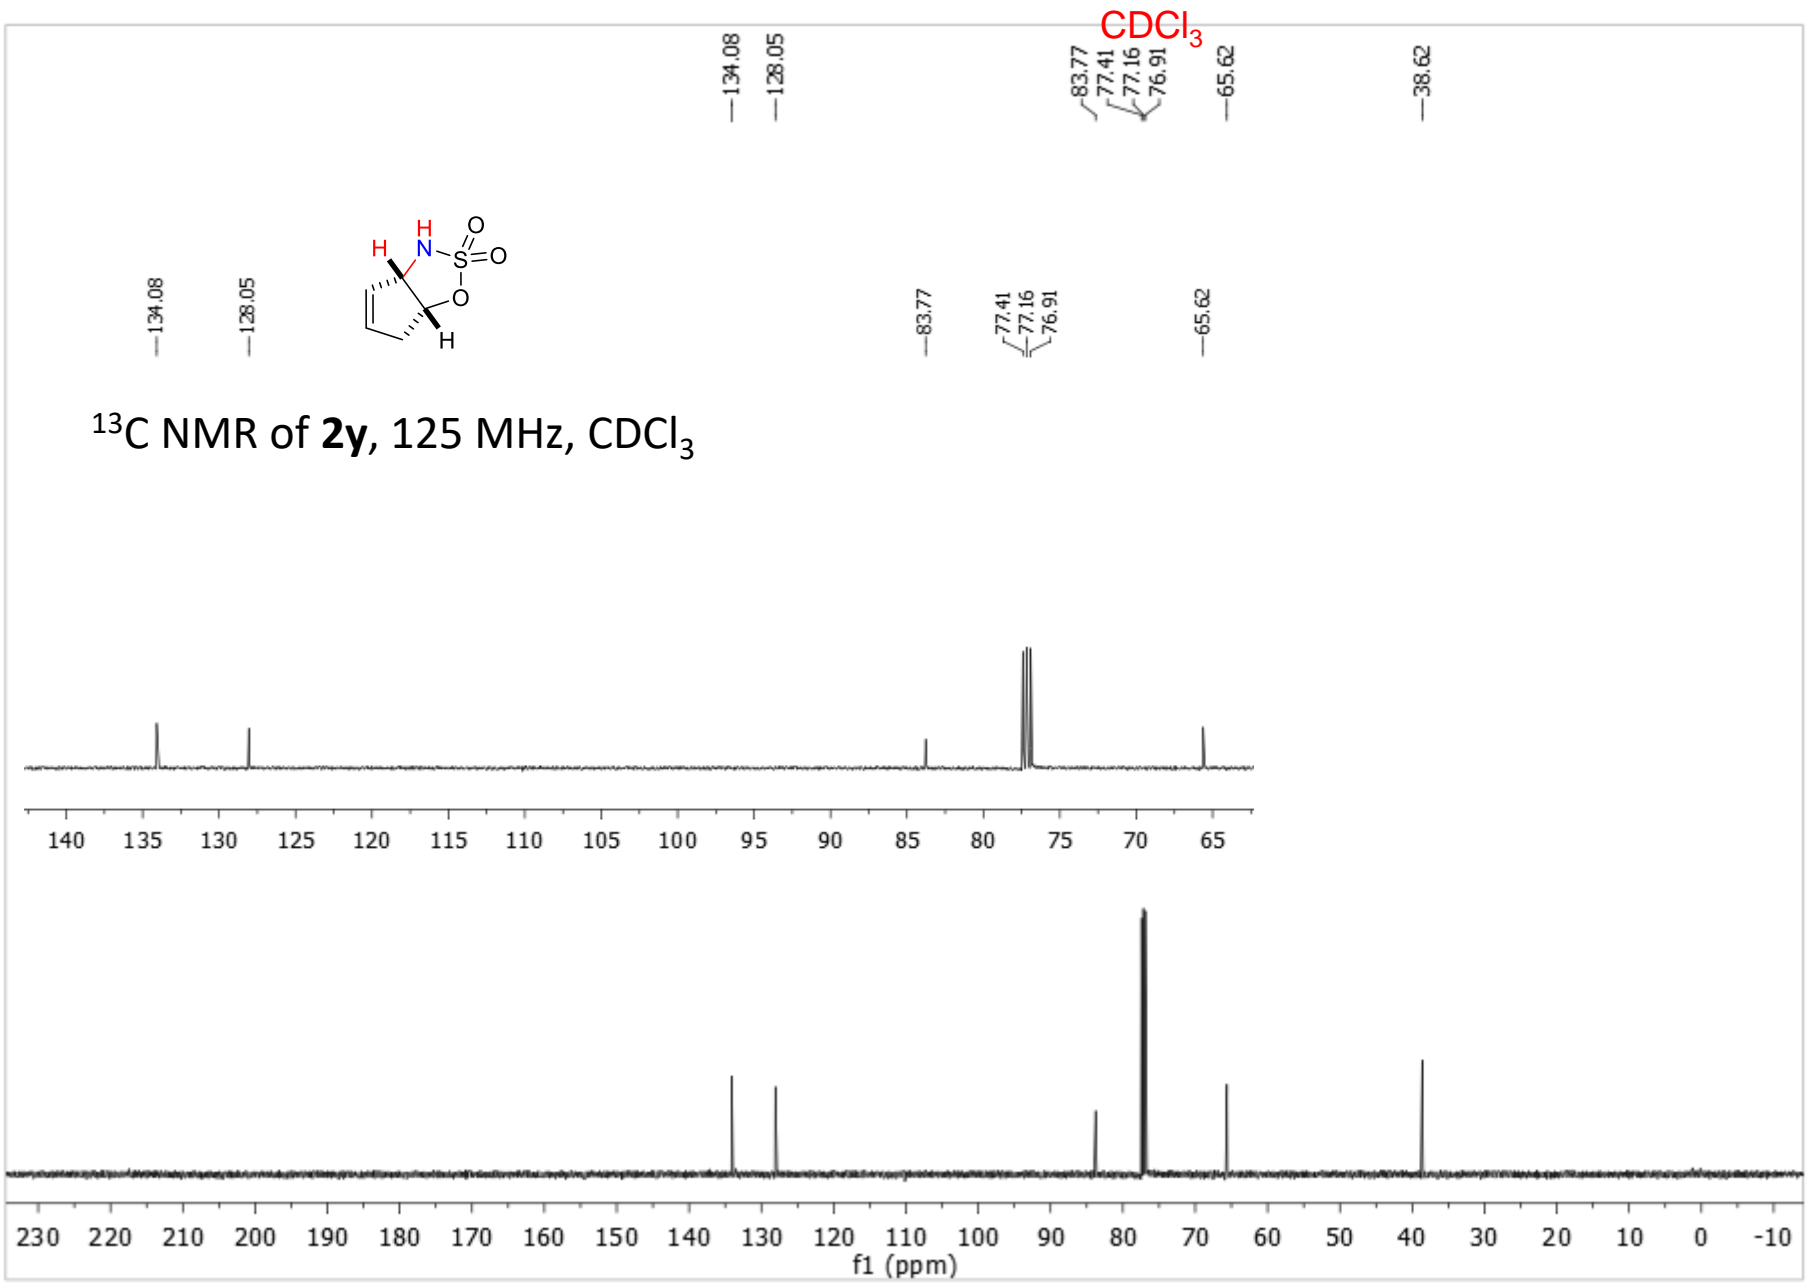

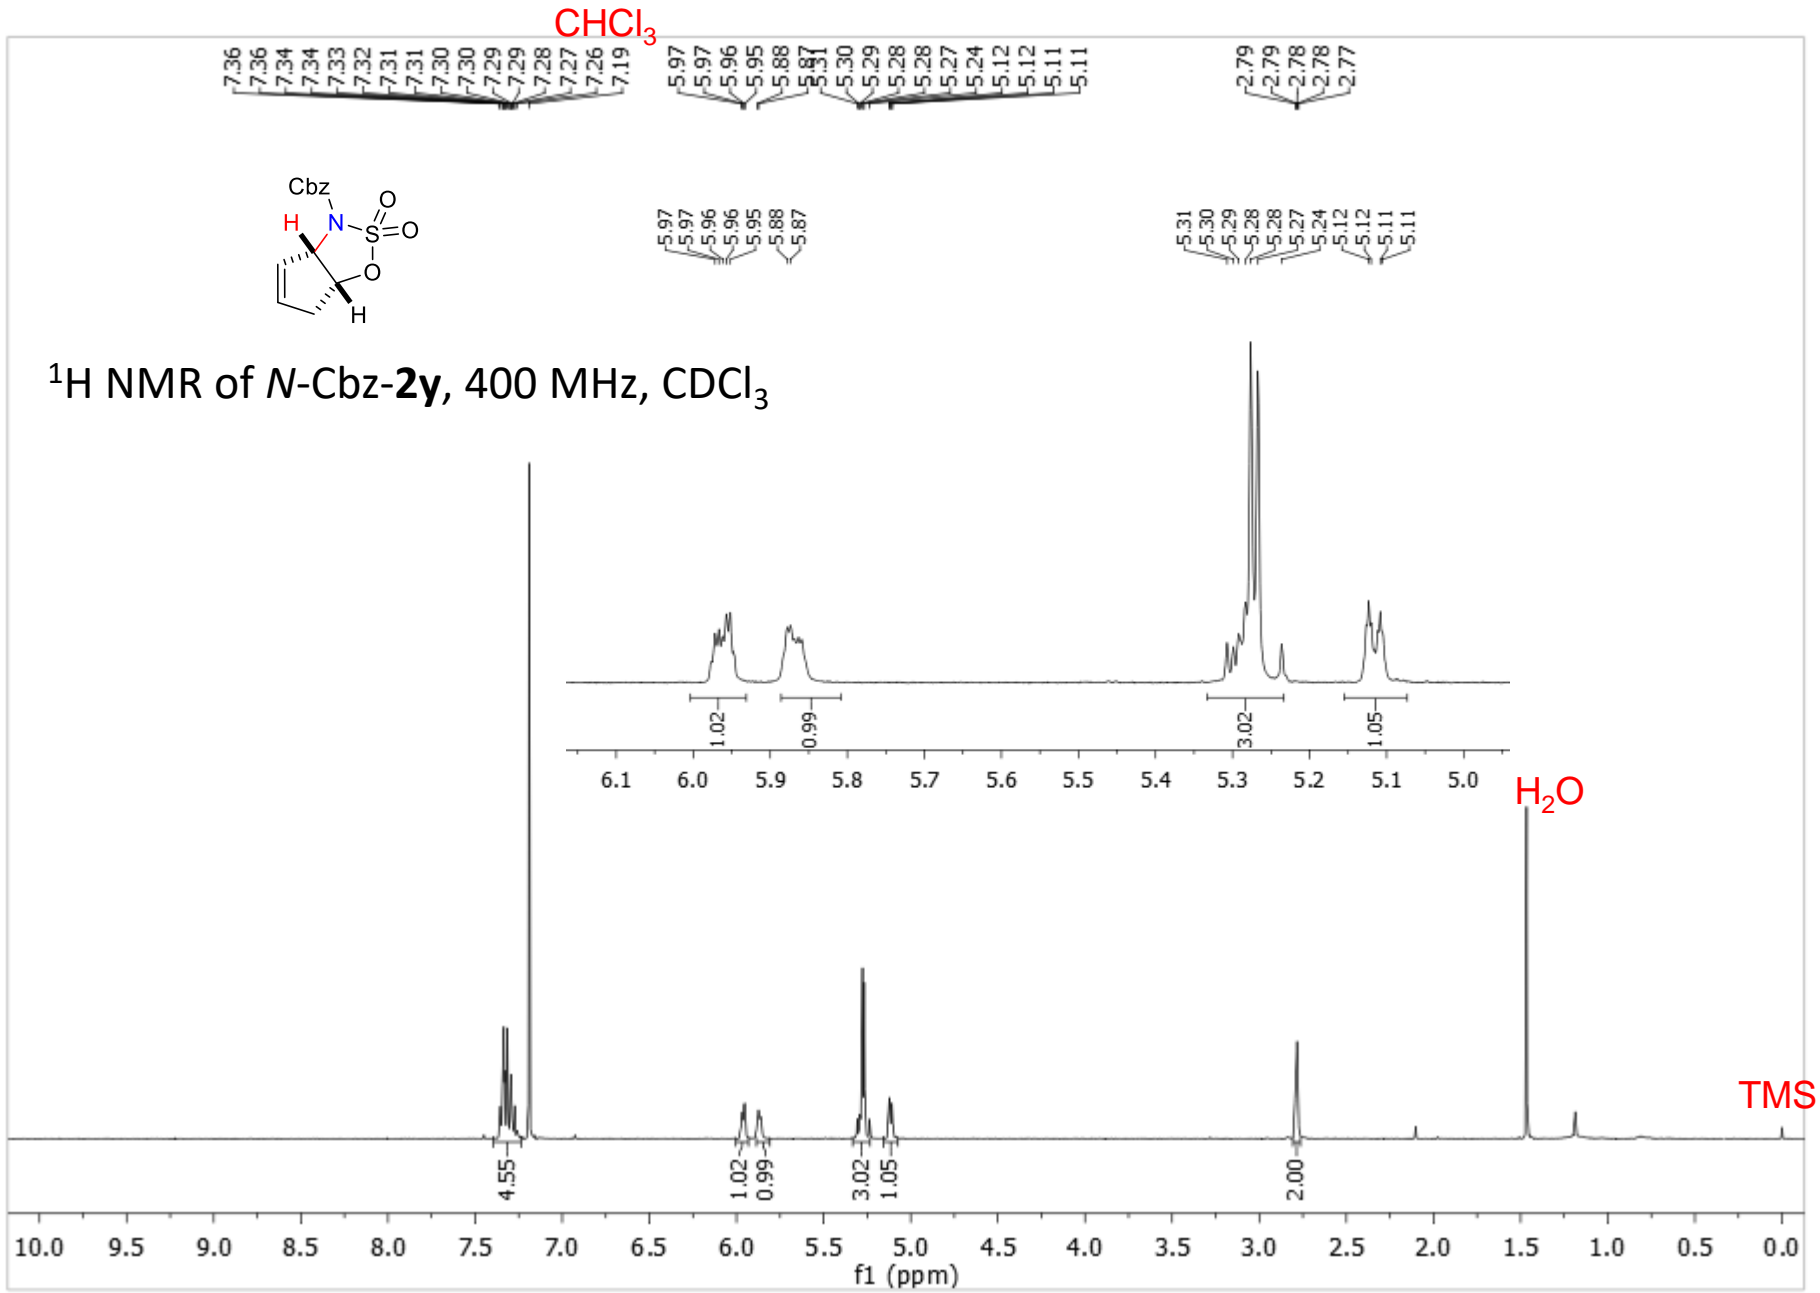

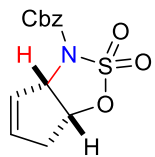

CDCl<sub>3</sub>

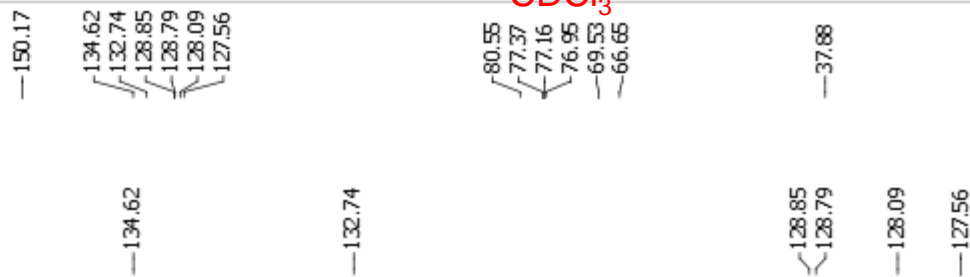

<sup>13</sup>C NMR of *N*-Cbz-**2y**, 150 MHz, CDCl<sub>3</sub>

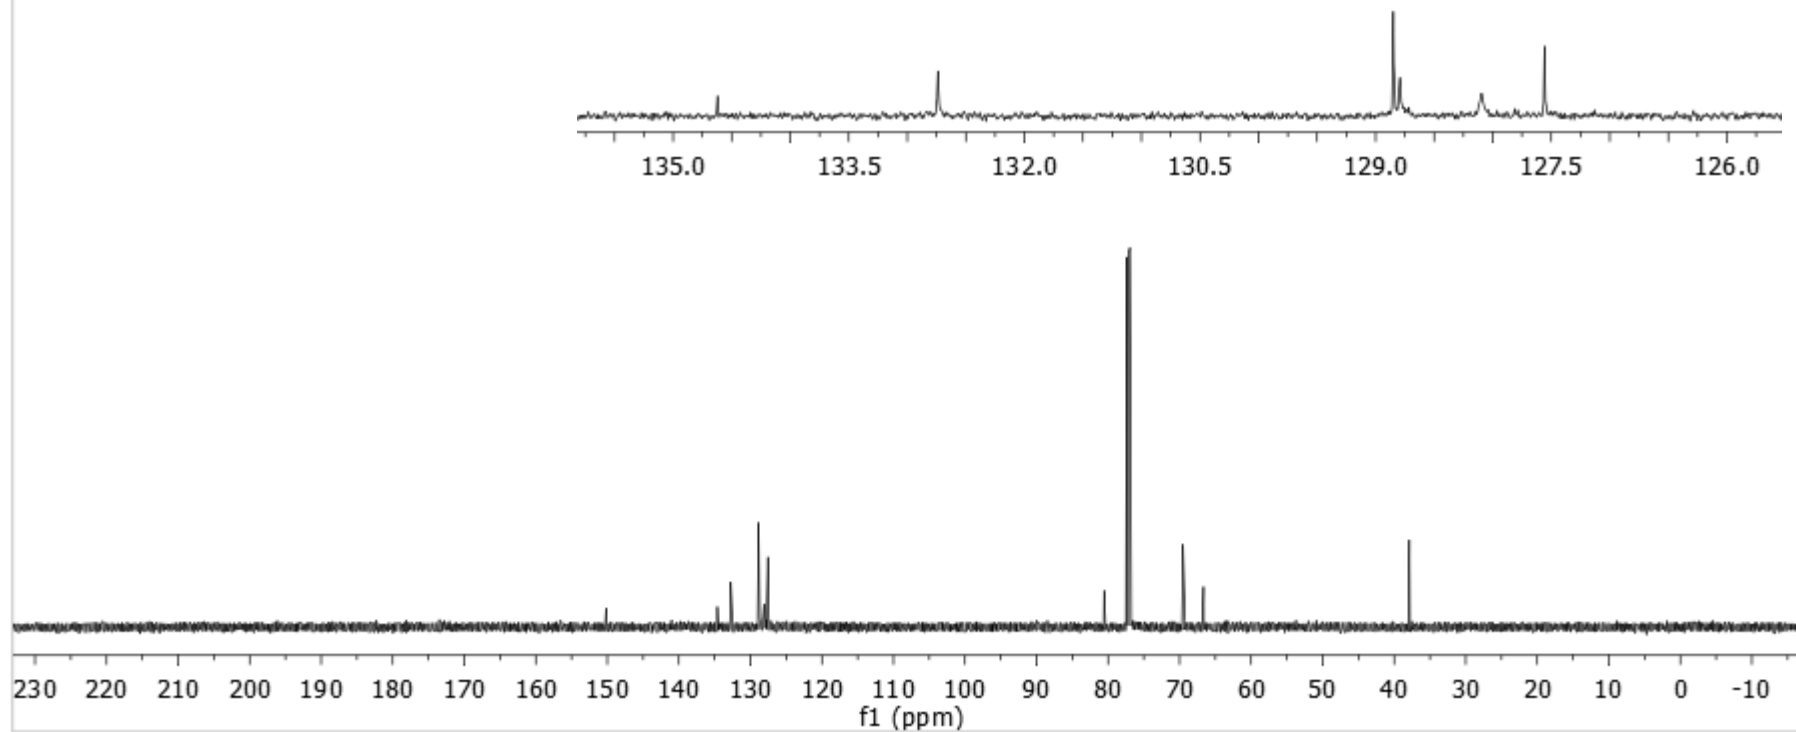

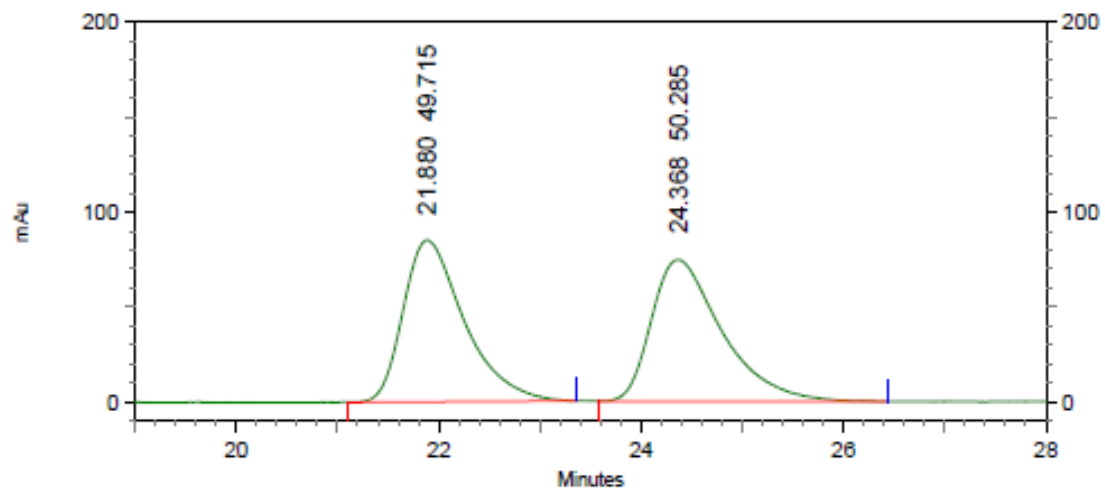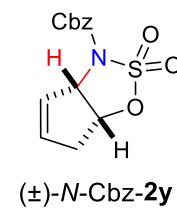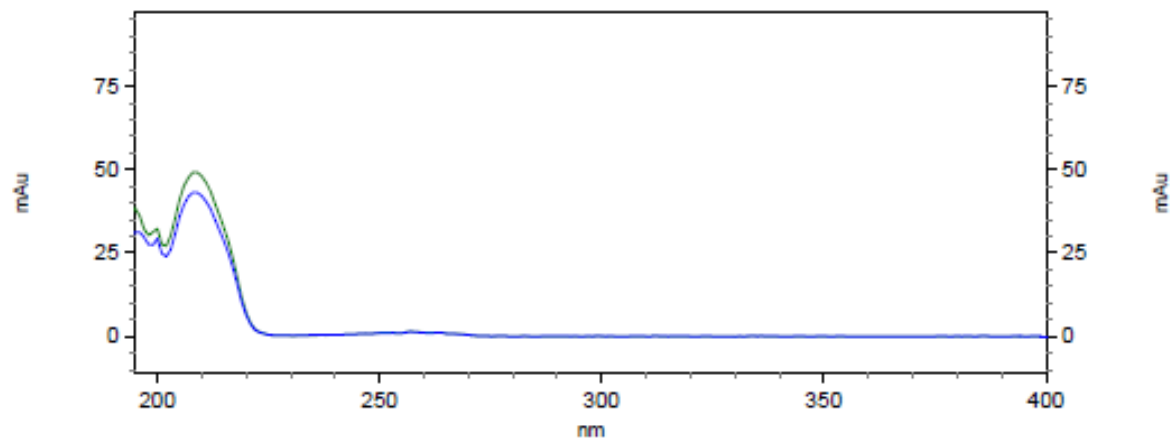

4: 212 nm, 4  
nm Results

| Pk #   | Retention Time | Area Percent |
|--------|----------------|--------------|
| 1      | 21.880         | 49.715       |
| 2      | 24.368         | 50.285       |
| Totals |                | 100.000      |



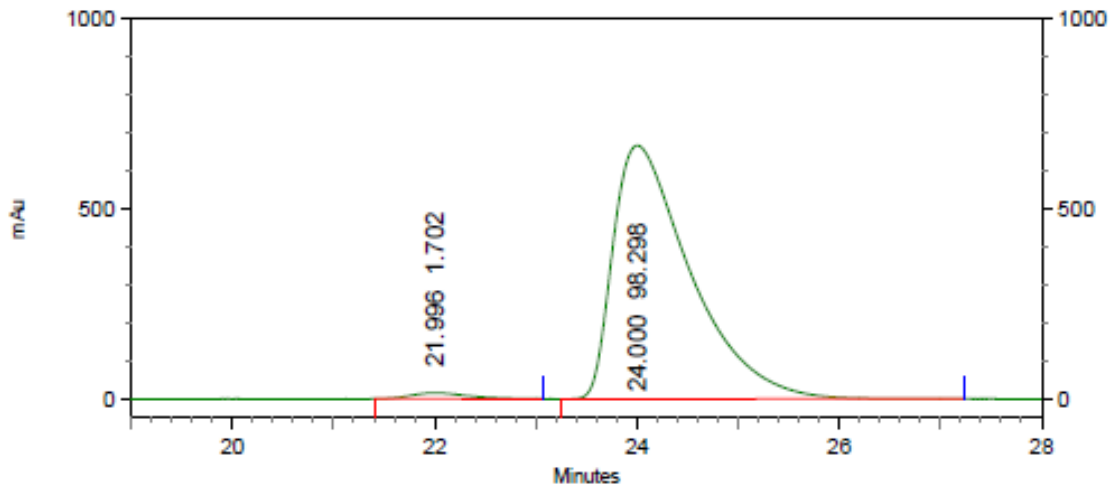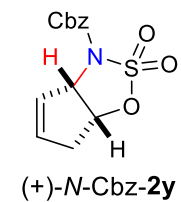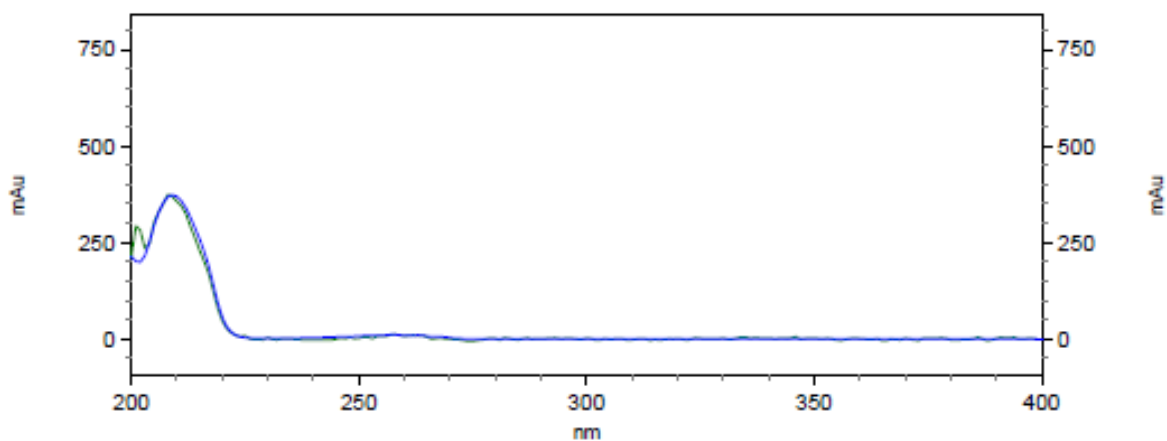

4: 212 nm, 4  
 nm Results

| Pk #   | Retention Time | Area Percent |
|--------|----------------|--------------|
| 1      | 21.996         | 1.702        |
| 2      | 24.000         | 98.298       |
| Totals |                | 100.000      |

CHCl<sub>3</sub>

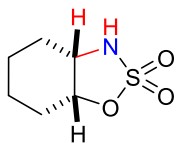

<sup>1</sup>H NMR of **2z**, 400 MHz, CDCl<sub>3</sub>

4.90  
4.89  
4.88  
4.87

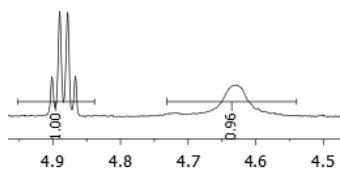

7.25  
7.25

4.90  
4.89  
4.88  
4.87

3.83  
3.81  
3.80  
3.80  
3.78  
3.77

1.94  
1.93  
1.92  
1.92  
1.91  
1.89  
1.84  
1.81  
1.80  
1.78

1.66  
1.65  
1.63  
1.62  
1.61  
1.60  
1.59  
1.58  
1.56  
1.50  
1.49  
1.48  
1.47  
1.46  
1.45  
1.44  
1.38  
1.36  
1.35  
1.34  
1.33  
1.32  
1.31  
1.30  
1.24

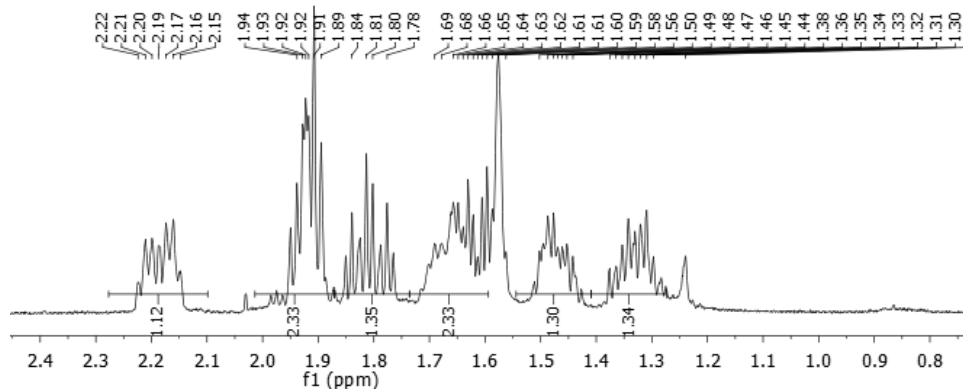

10.0 9.5 9.0 8.5 8.0 7.5 7.0 6.5 6.0 5.5 5.0 4.5 4.0 3.5 3.0 2.5 2.0 1.5 1.0 0.5 0.0

1.00

0.96

1.00

1.12

2.33

1.35

2.33

1.34

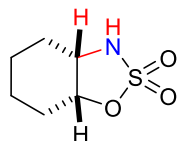

$^{13}\text{C}$  NMR of **2z**, 100 MHz,  $\text{CDCl}_3$

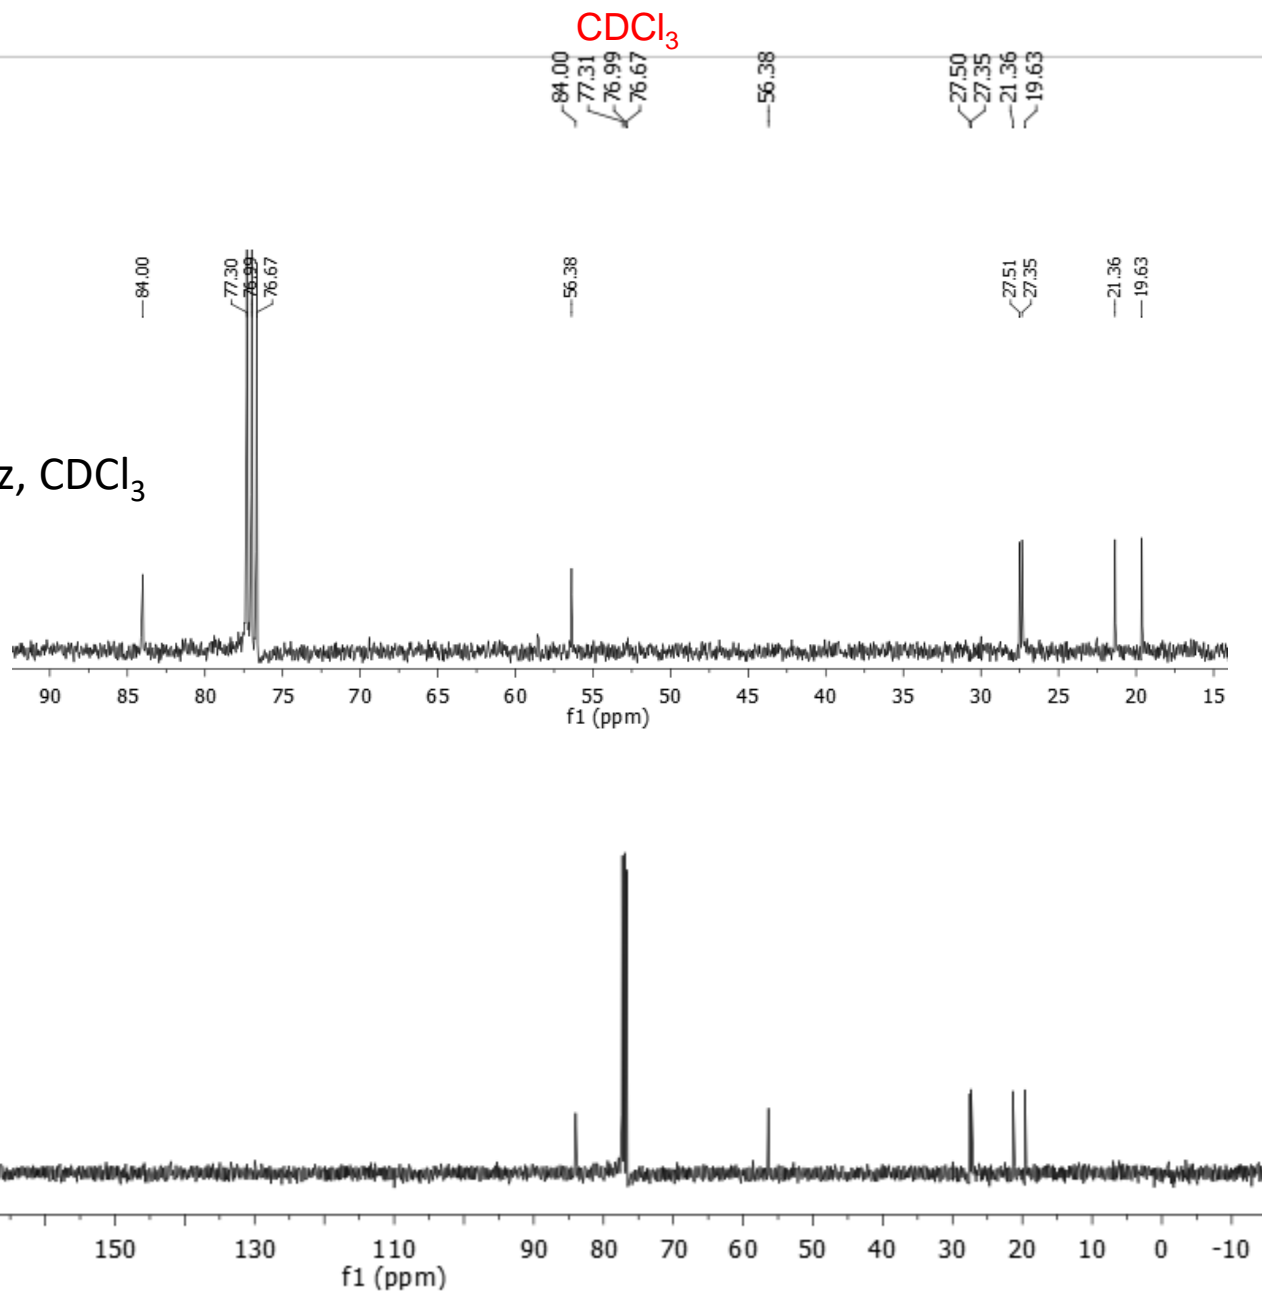

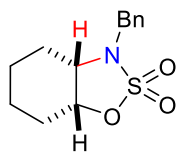

$^1\text{H}$  NMR of *N*-Bn-**2z**, 250 MHz,  $\text{CDCl}_3$

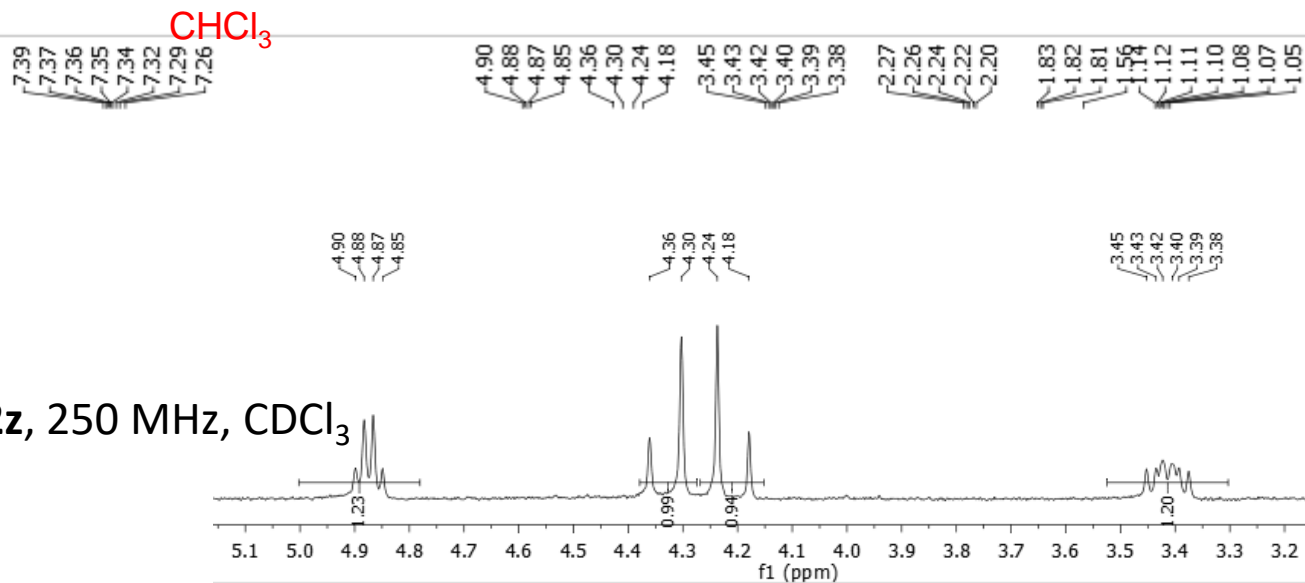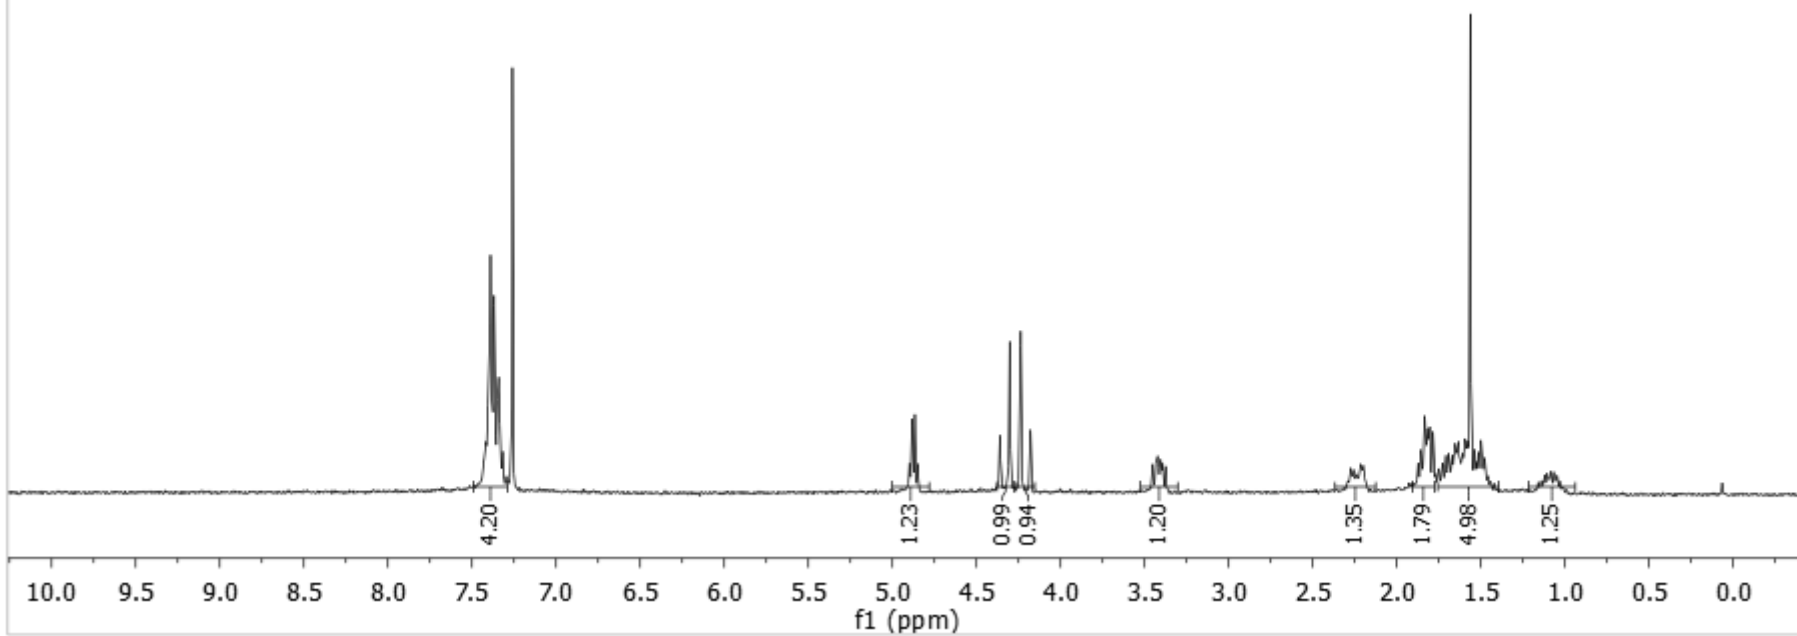

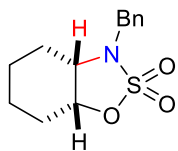

$^{13}\text{C}$  NMR of N-Bn-2z, 62.5 MHz,  $\text{CDCl}_3$

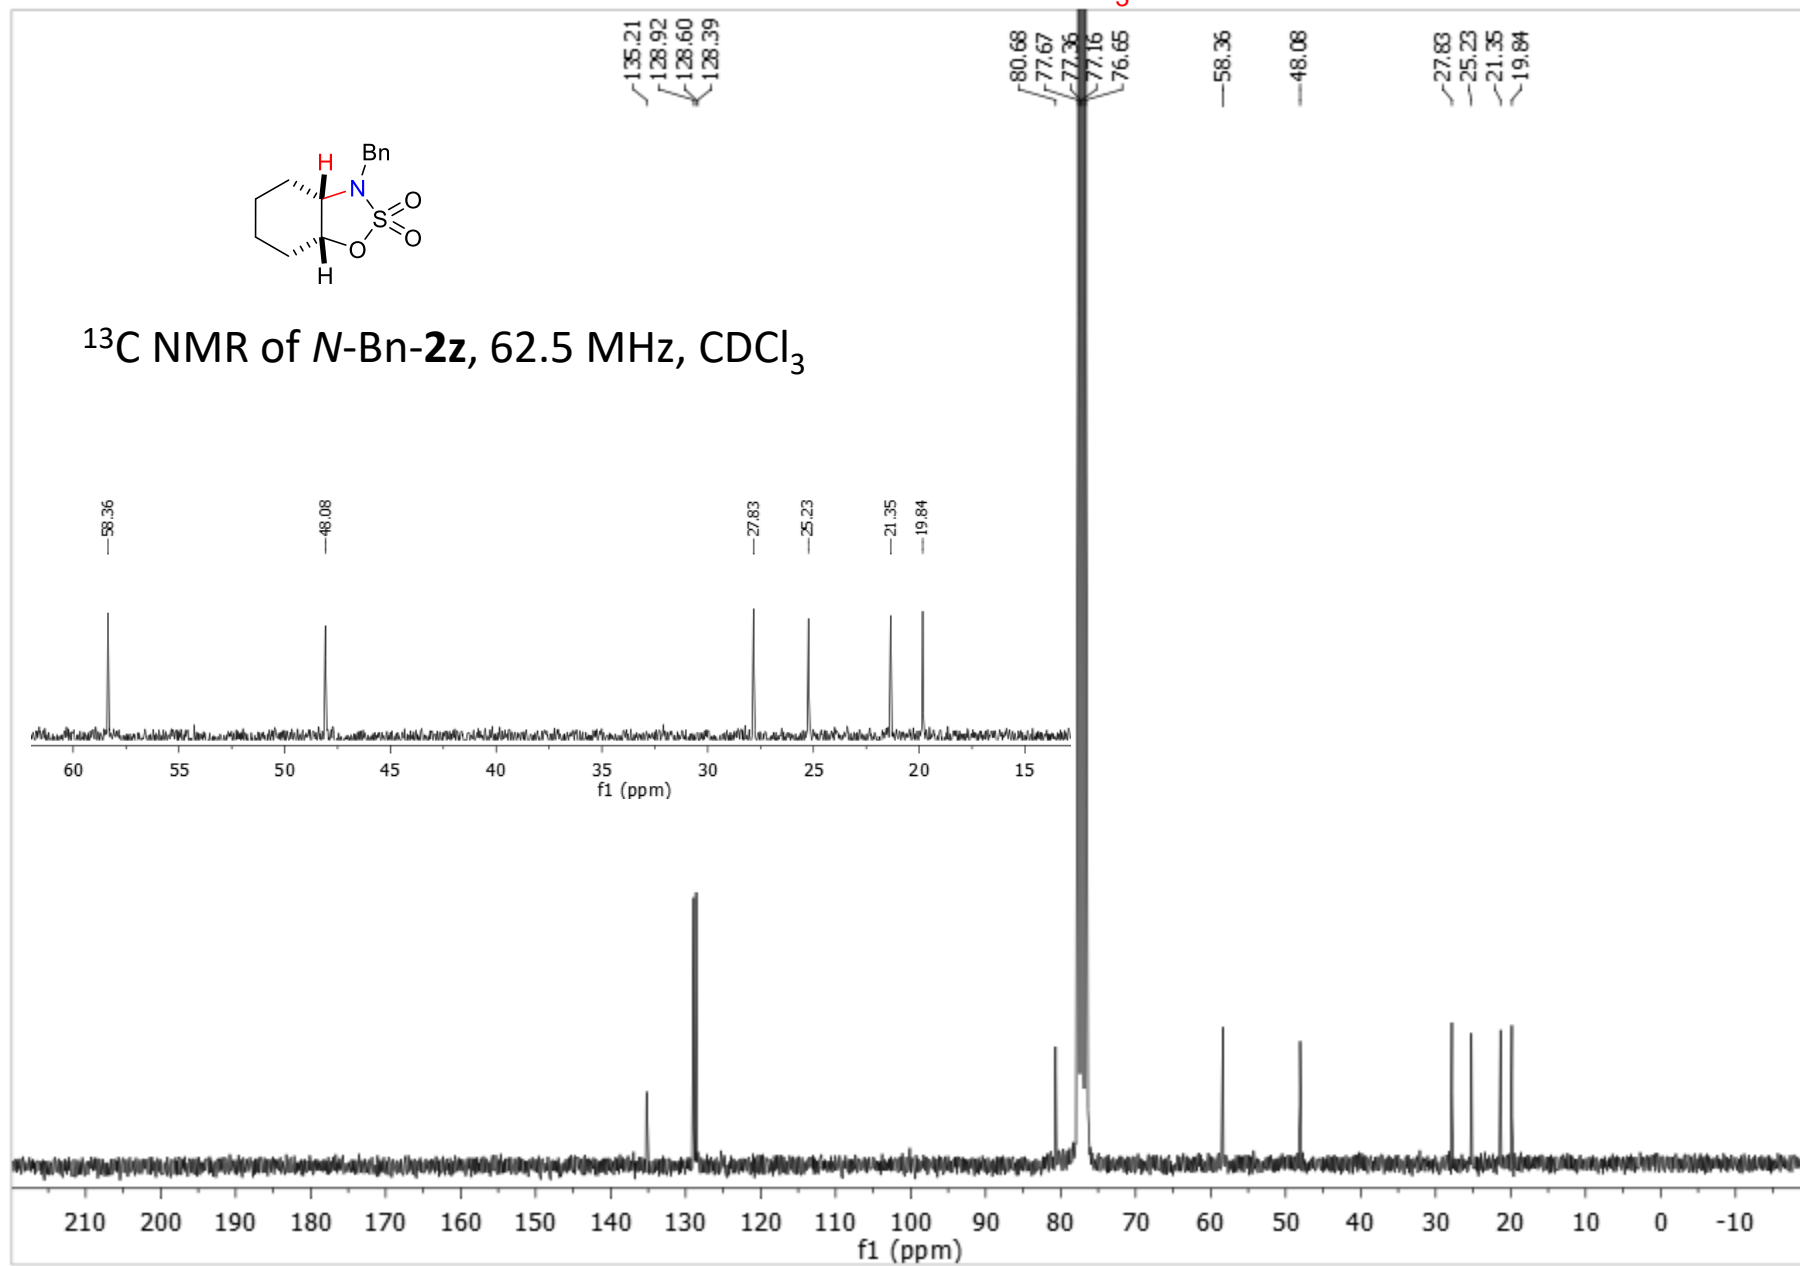

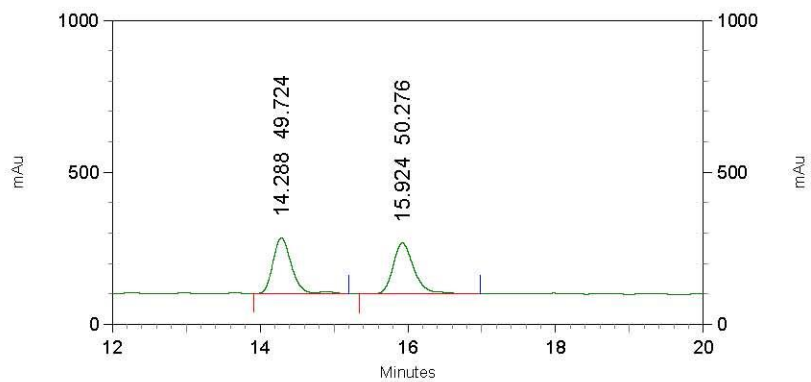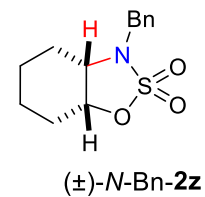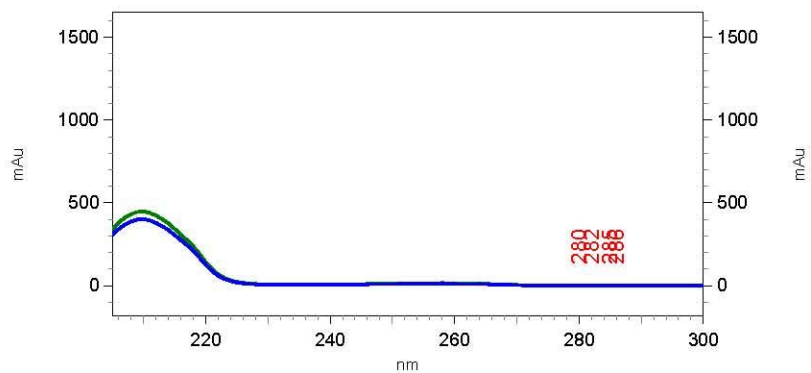

18: 219 nm, 4 nm  
Results

| Pk #   | Name | Retention Time | Area Percent |
|--------|------|----------------|--------------|
| 1      |      | 14.288         | 49.724       |
| 2      |      | 15.924         | 50.276       |
| Totals |      |                | 100.000      |

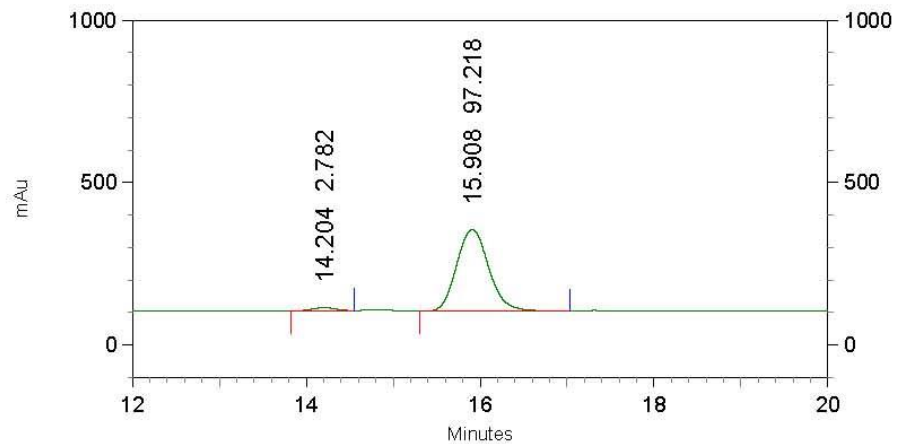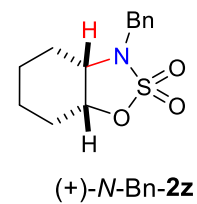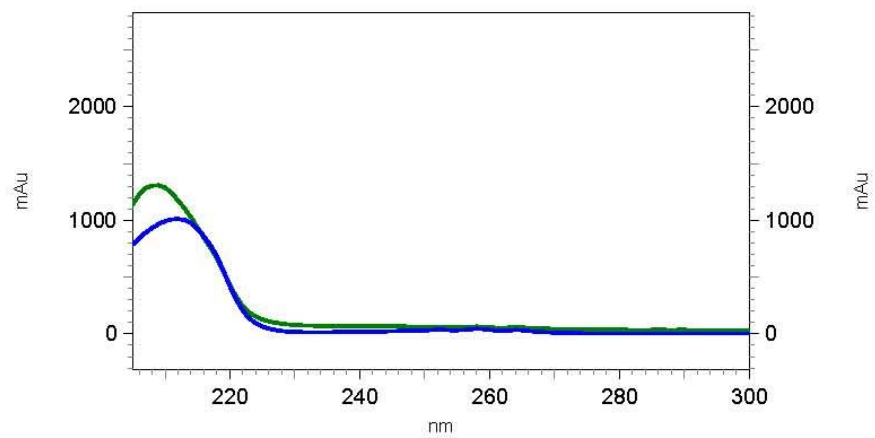

17: 221 nm, 4 nm

Results

| Pk #   | Name | Retention Time | Area Percent |
|--------|------|----------------|--------------|
| 1      |      | 14.204         | 2.782        |
| 2      |      | 15.908         | 97.218       |
| Totals |      |                | 100.000      |

CHCl<sub>3</sub>

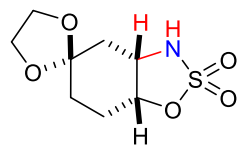

<sup>1</sup>H NMR of **2aa**, 400 MHz, CDCl<sub>3</sub>

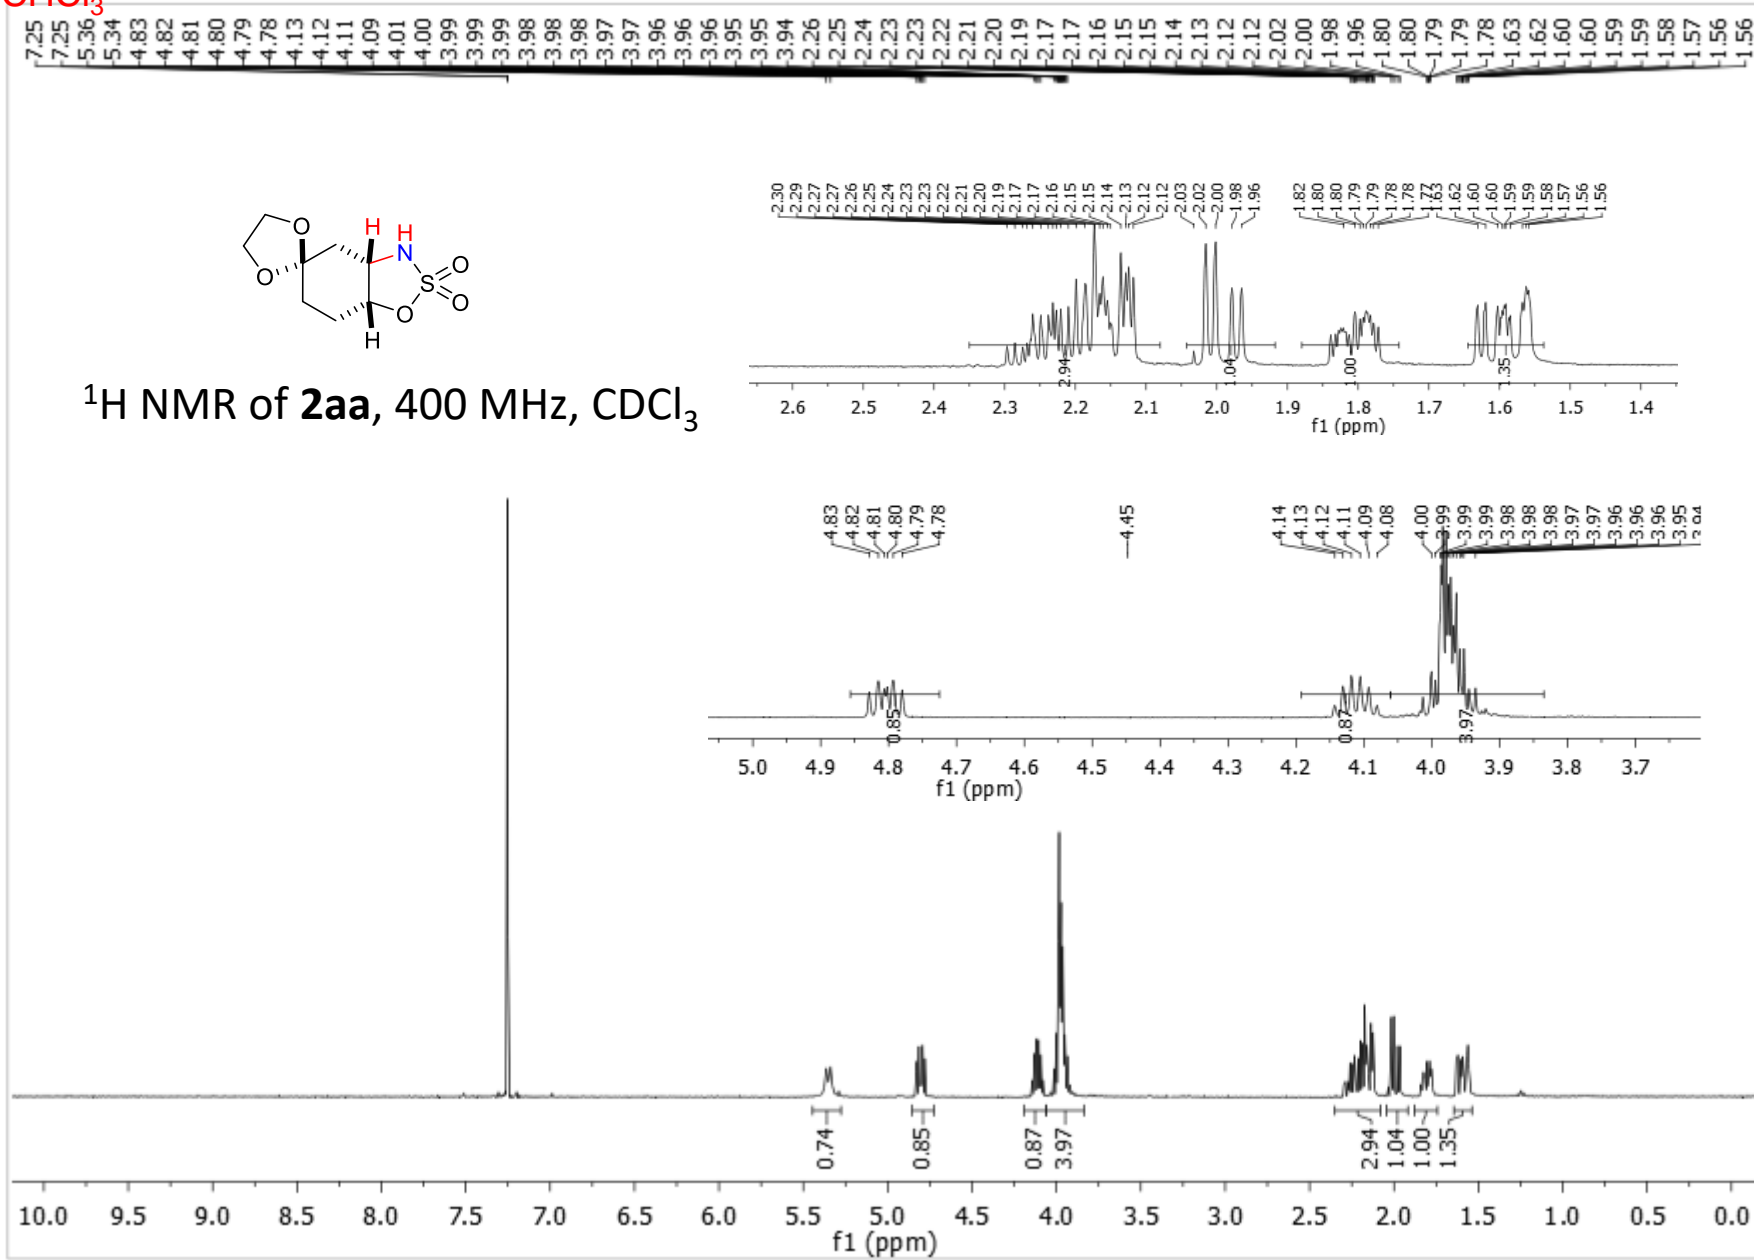



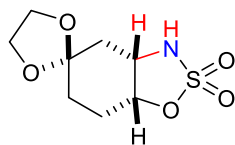

$^{13}\text{C}$  NMR of **2aa**, 100 MHz,  $\text{CDCl}_3$

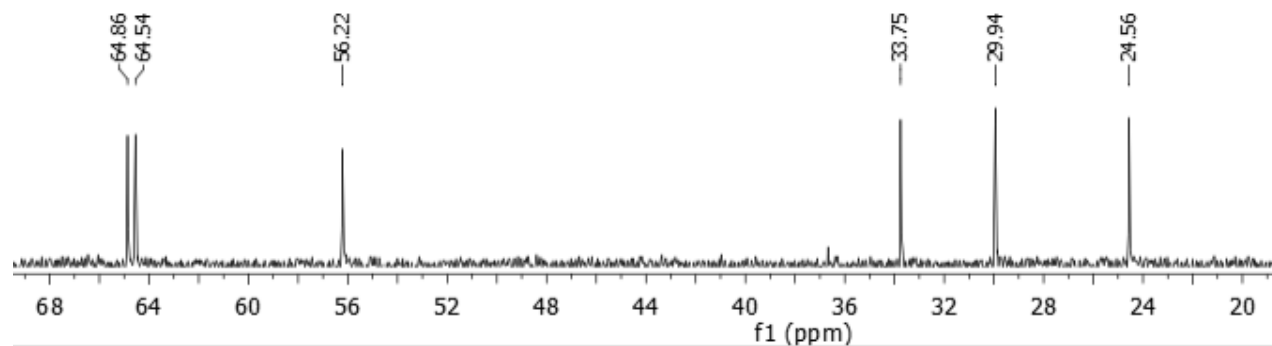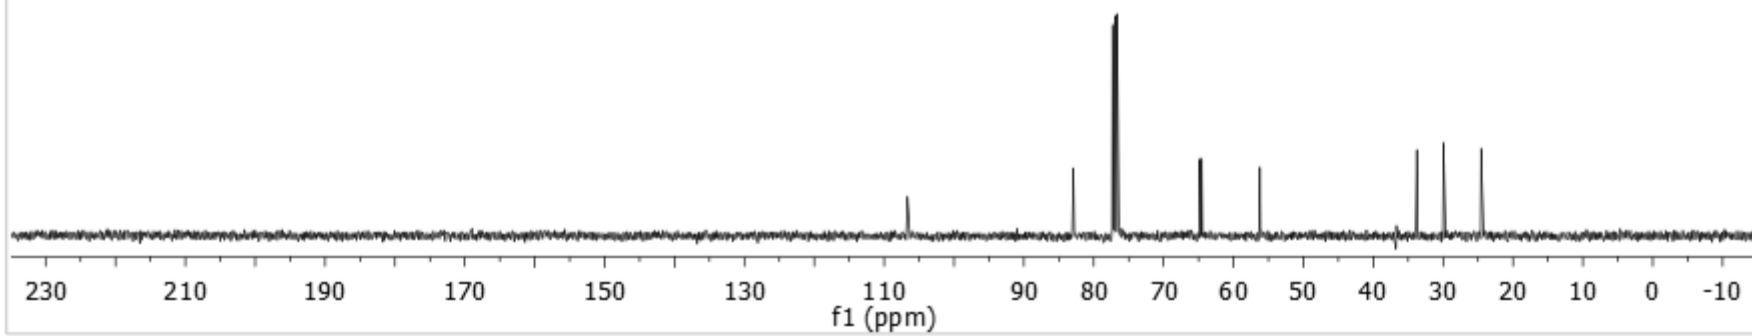

$\text{CDCl}_3$

106.66

82.92

77.29

76.98

76.66

64.86

64.54

56.22

33.75

29.94

24.56

CHCl<sub>3</sub>

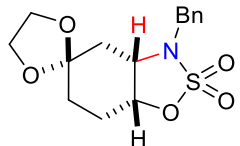

<sup>1</sup>H NMR of *N*-Bn-2aa,  
400 MHz, CDCl<sub>3</sub>

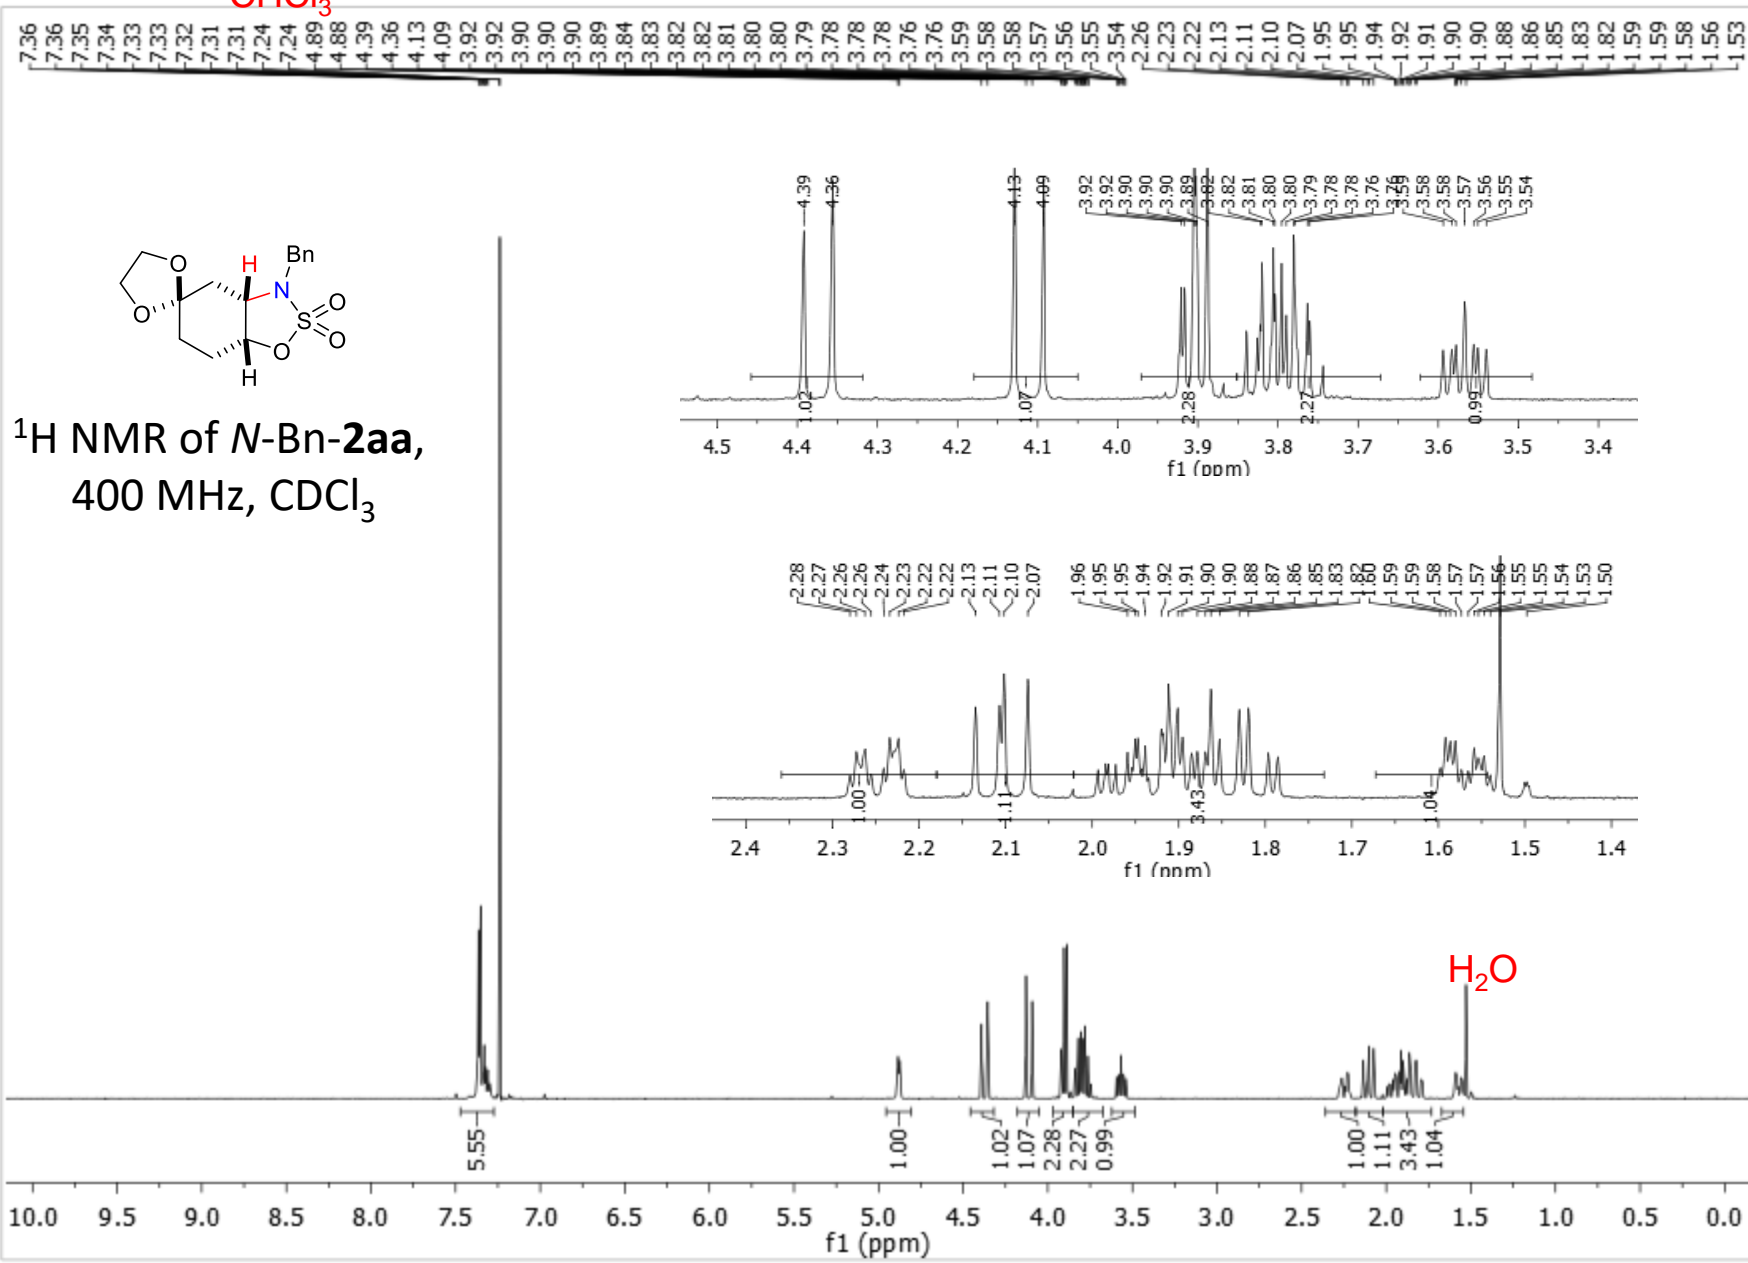

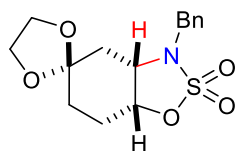

$^{13}\text{C}$  NMR of *N*-Bn-2aa,  
100 MHz,  $\text{CDCl}_3$

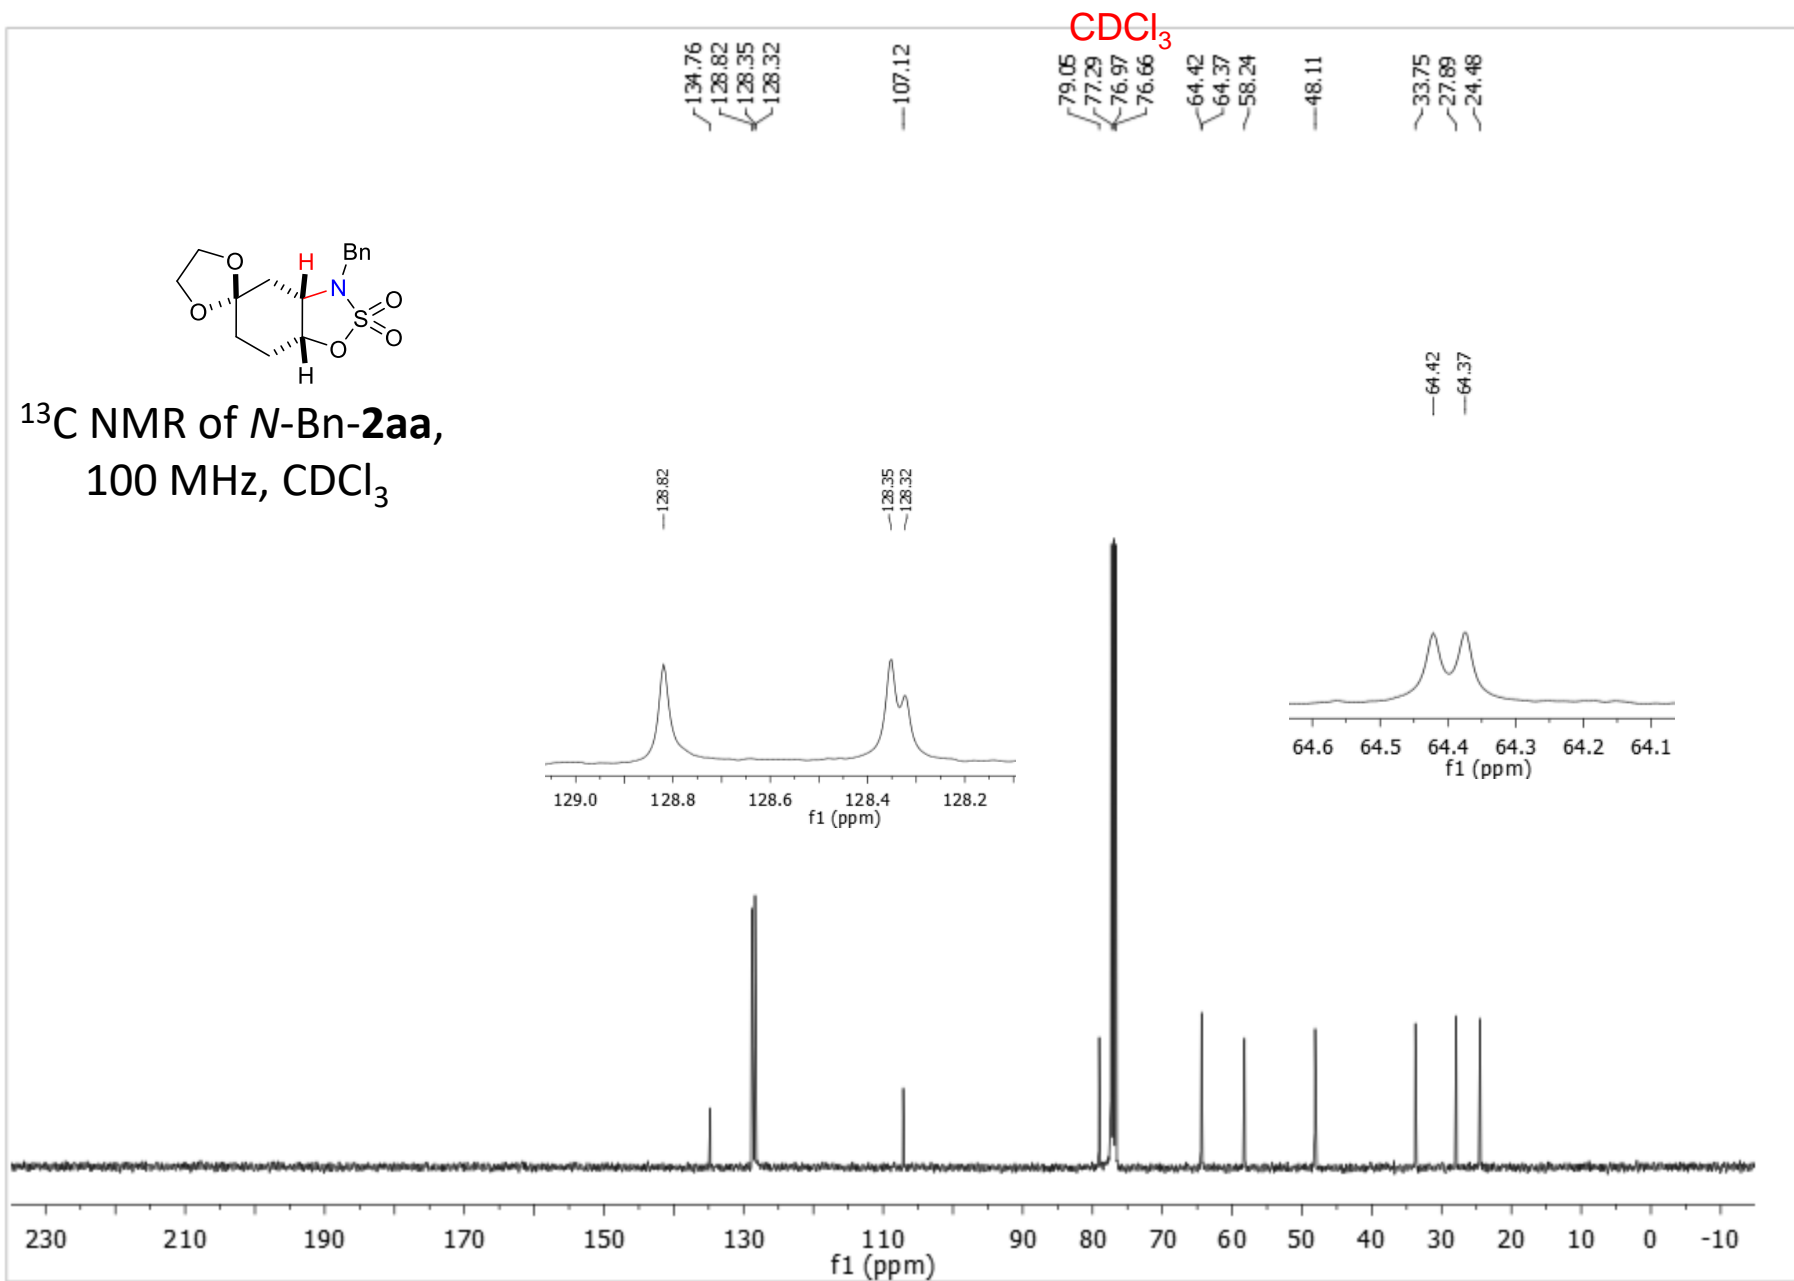

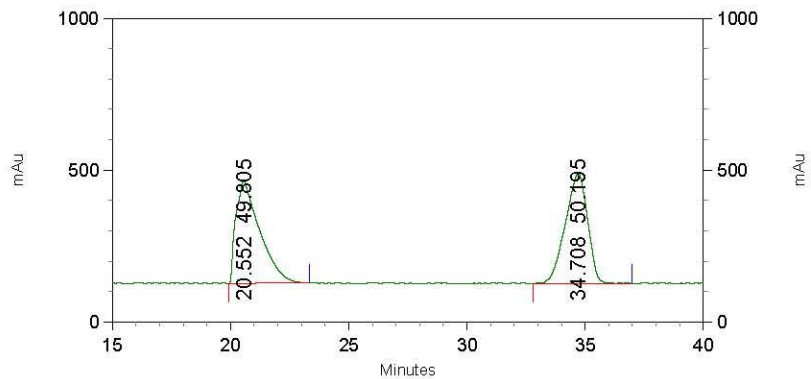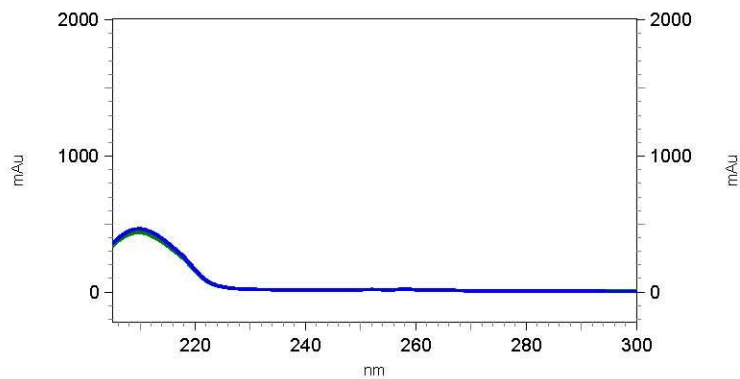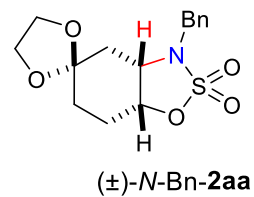

17: 214 nm, 4 nm  
Results

| Pk #   | Name | Retention Time | Area Percent |
|--------|------|----------------|--------------|
| 1      |      | 20.552         | 49.805       |
| 2      |      | 34.708         | 50.195       |
| Totals |      |                | 100.000      |

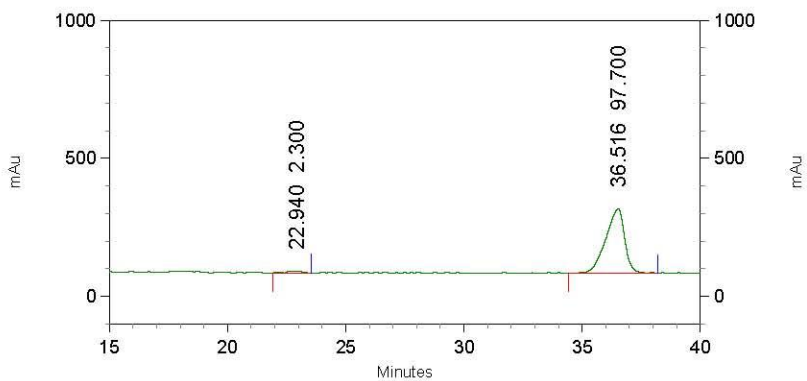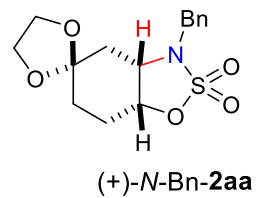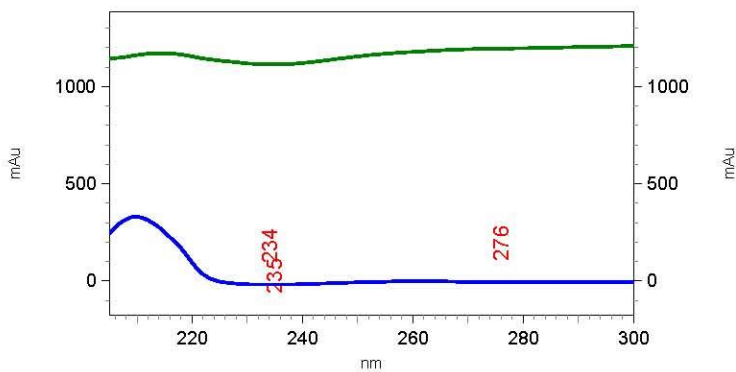

19: 214 nm, 4 nm

Results

| Pk #   | Name | Retention Time | Area Percent |
|--------|------|----------------|--------------|
| 1      |      | 22.940         | 2.300        |
| 2      |      | 36.516         | 97.700       |
| Totals |      |                | 100.000      |

CHCl<sub>3</sub>

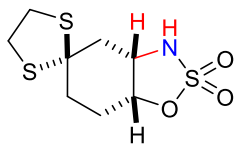

<sup>1</sup>H NMR of **2ab**, 600 MHz, CDCl<sub>3</sub>

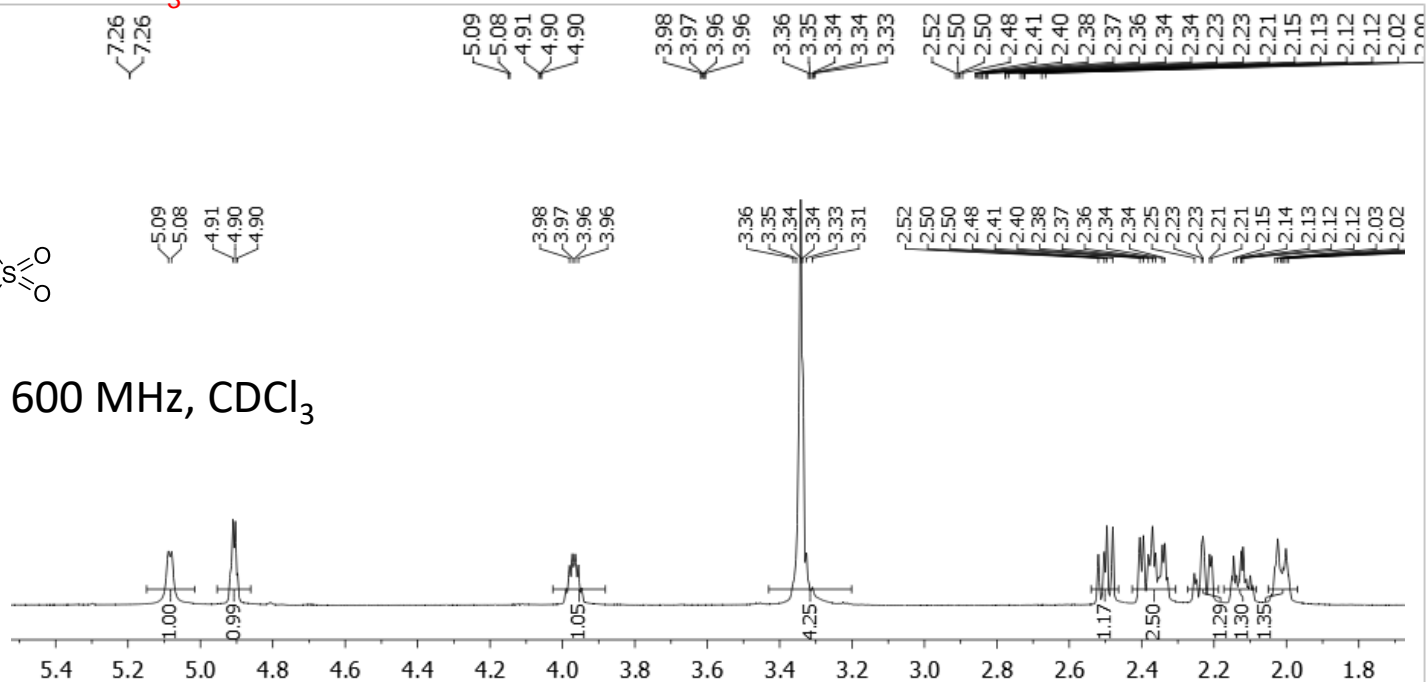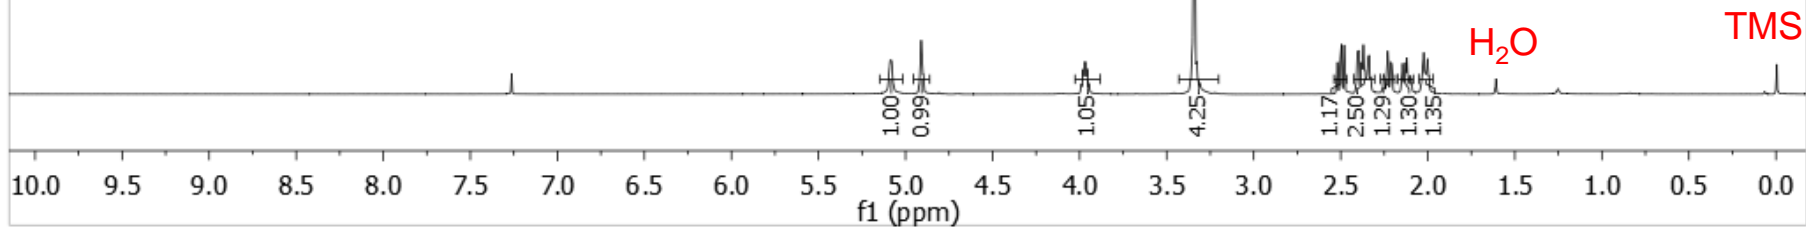

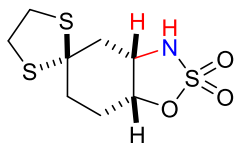

$^{13}\text{C}$  NMR of **2ab**, 150 MHz,  $\text{CDCl}_3$

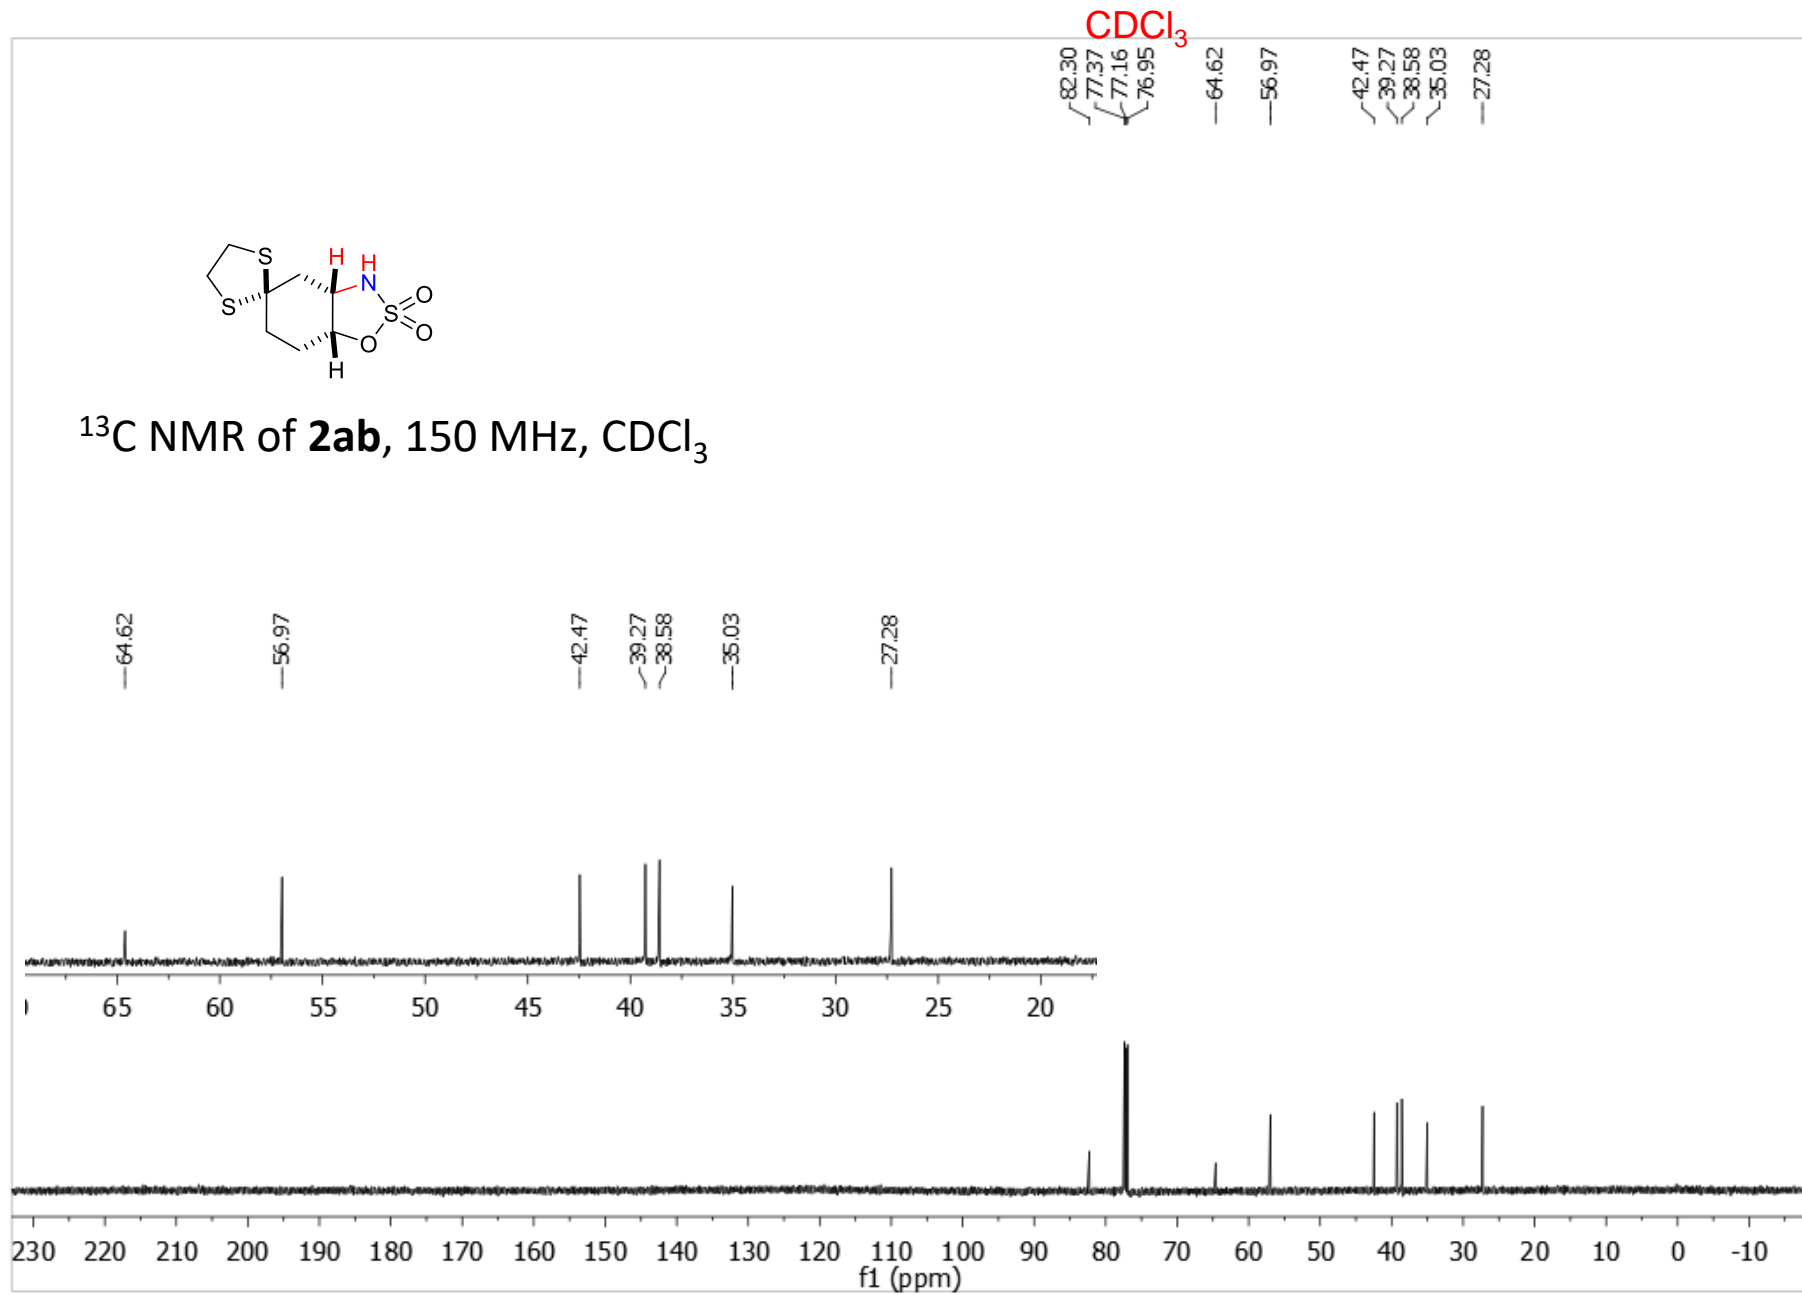

CHCl<sub>3</sub>

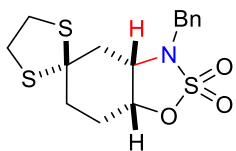

<sup>1</sup>H NMR of *N*-Bn-2ab, 600 MHz, CDCl<sub>3</sub>

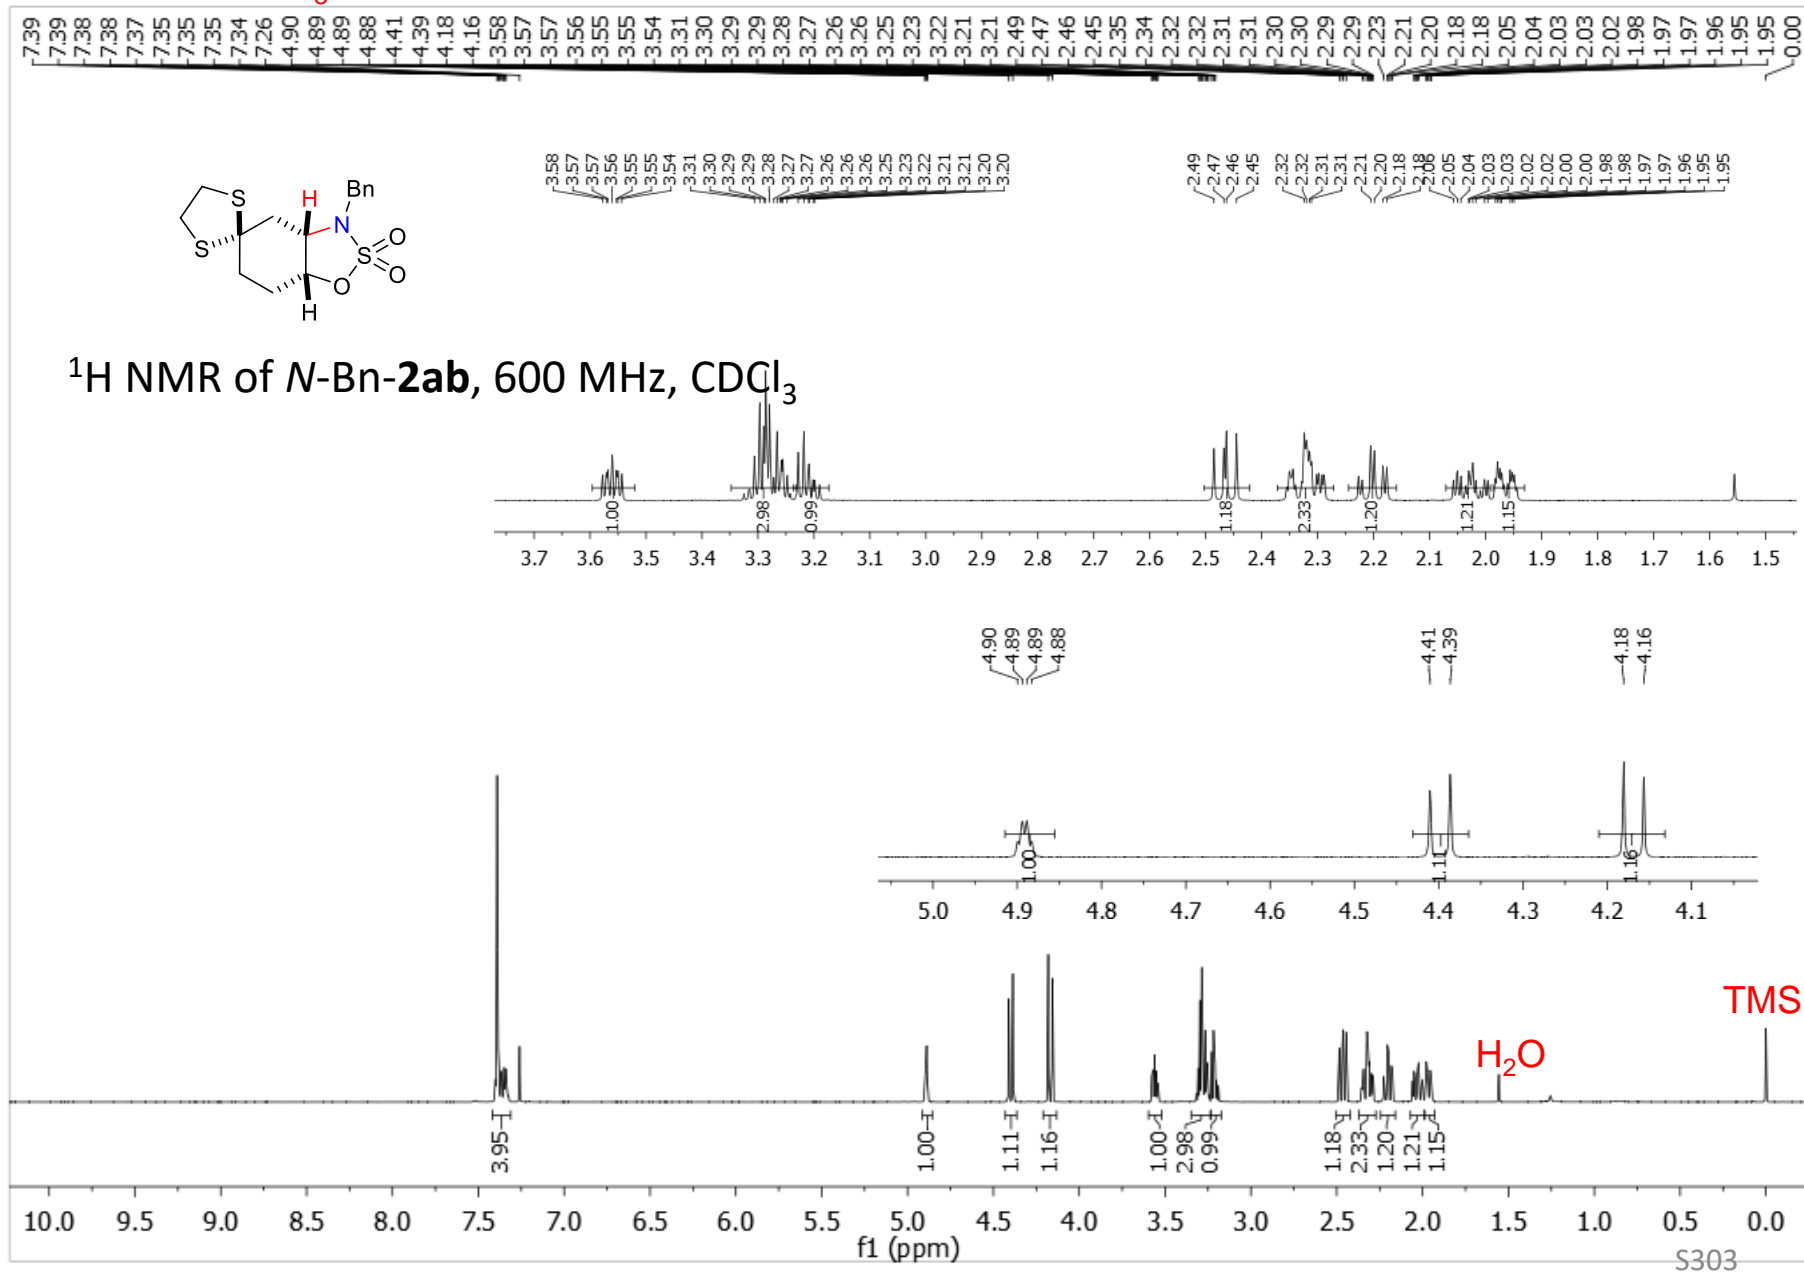



$\text{CDCl}_3$

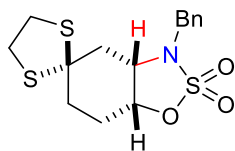

$^{13}\text{C}$  NMR of *N*-Bn-**2ab**, 150 MHz,  $\text{CDCl}_3$

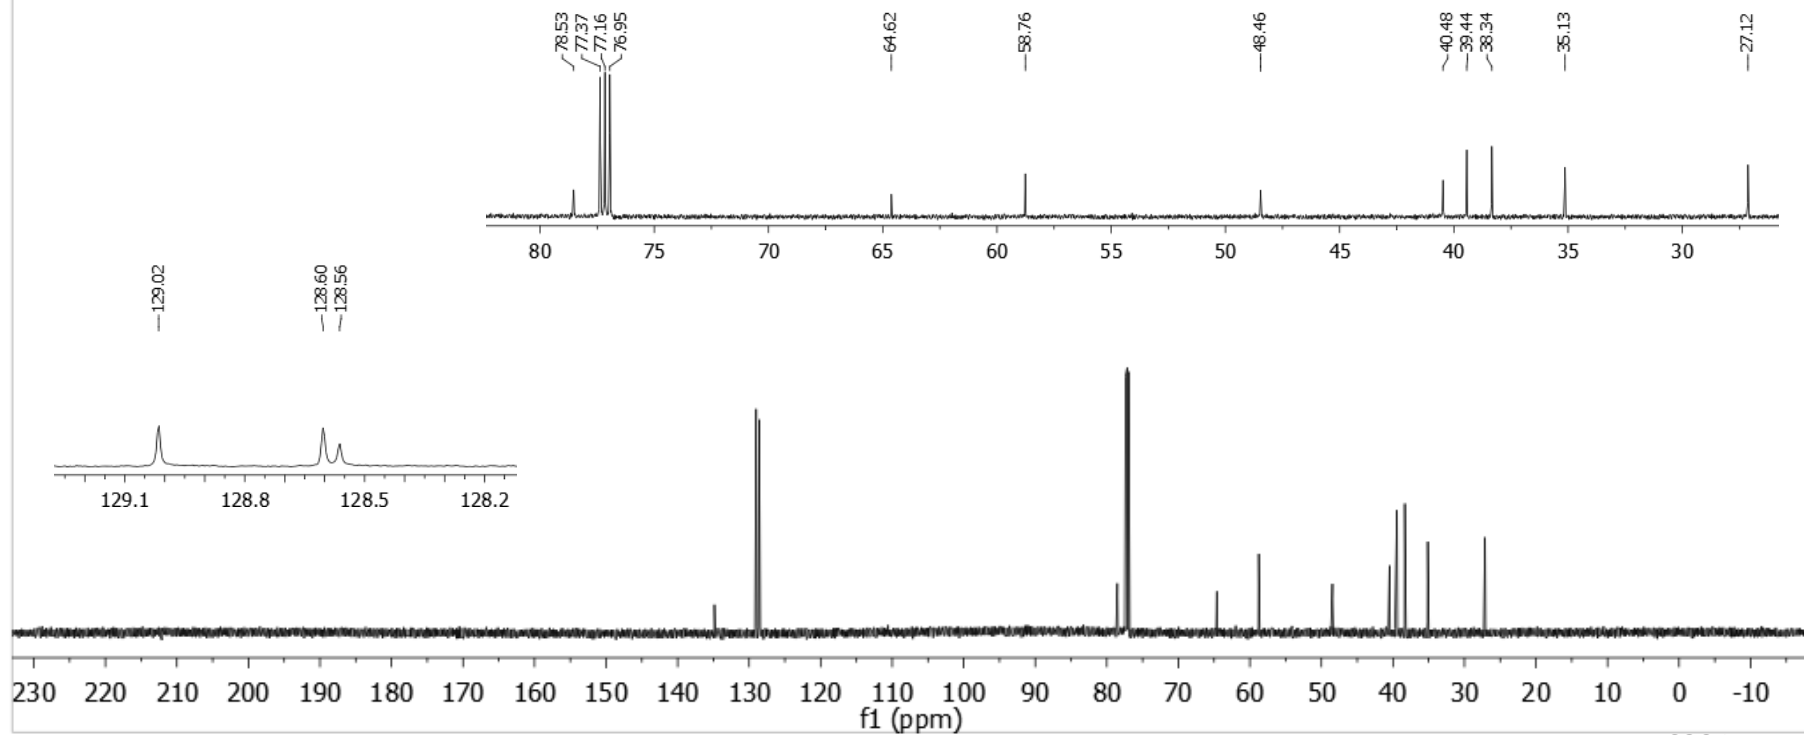

C:\EZStart\Projects\Default\Data\K0L-459-ADH-20%1.0  
 C:\Documents and Settings\zhang\Desktop\DSW\06052018.met

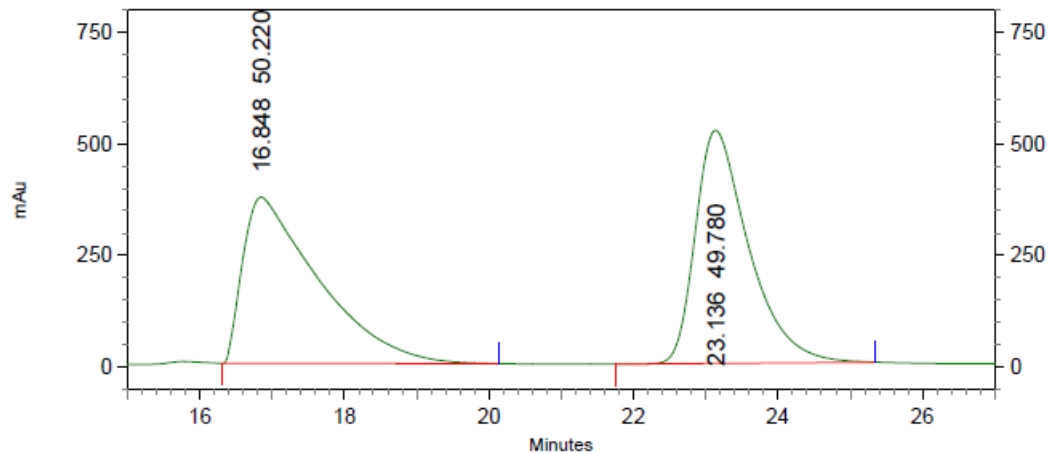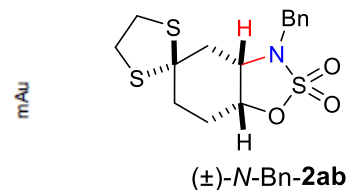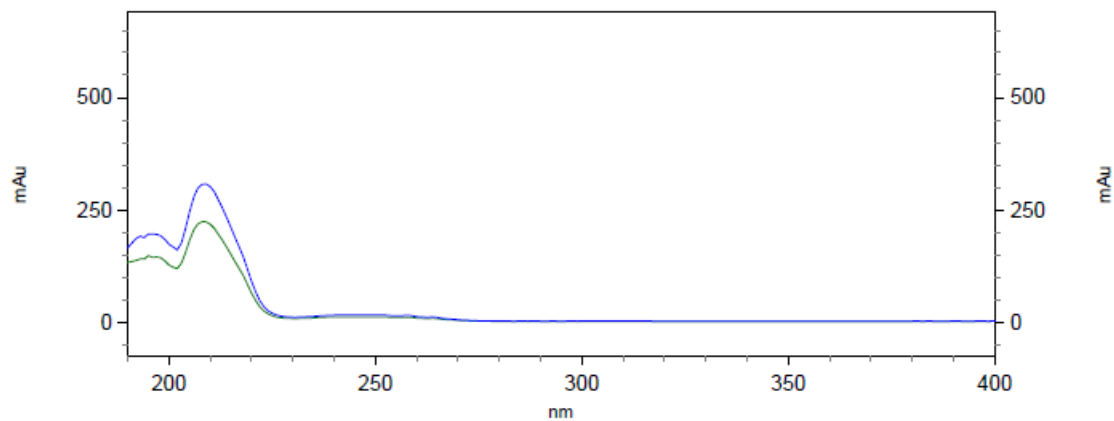

4: 215 nm, 4  
 nm Results

| Pk # | Retention Time | Area Percent |
|------|----------------|--------------|
| 1    | 16.848         | 50.220       |
| 2    | 23.136         | 49.780       |

|        |  |         |
|--------|--|---------|
| Totals |  | 100.000 |
|--------|--|---------|

C:\EZStart\Projects\Default\Data\K0L-458-ADH-20%1.0  
C:\Documents and Settings\zhang\Desktop\DSW\06052018.met

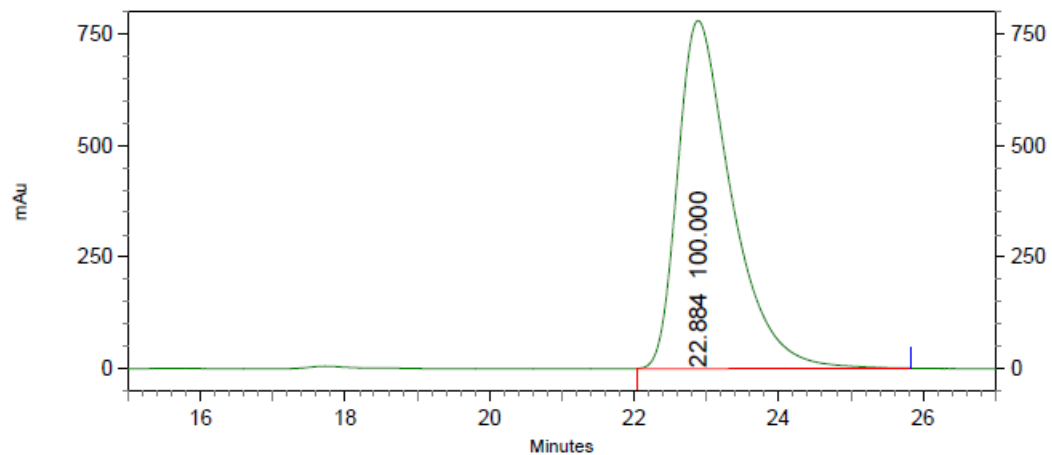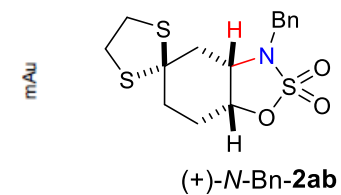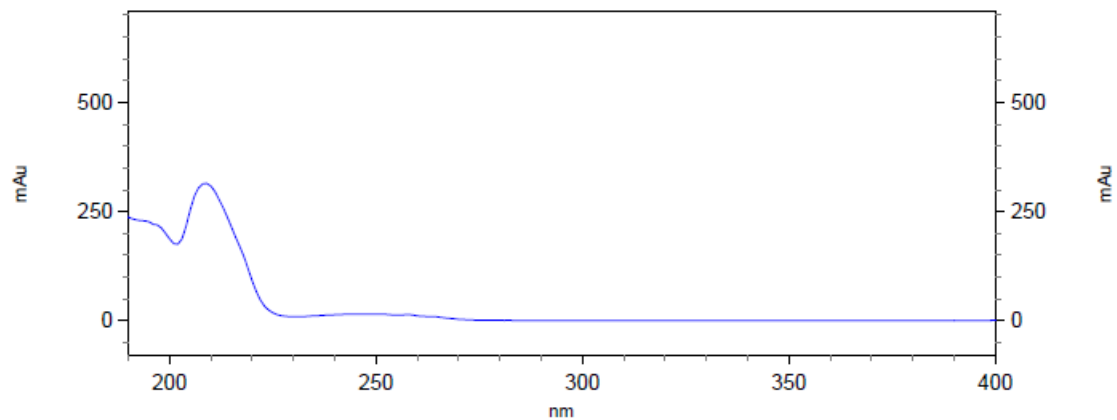

4: 213 nm, 4  
nm Results

| Pk #   | Retention Time | Area Percent |
|--------|----------------|--------------|
| 1      | 22.884         | 100.000      |
| Totals |                | 100.000      |

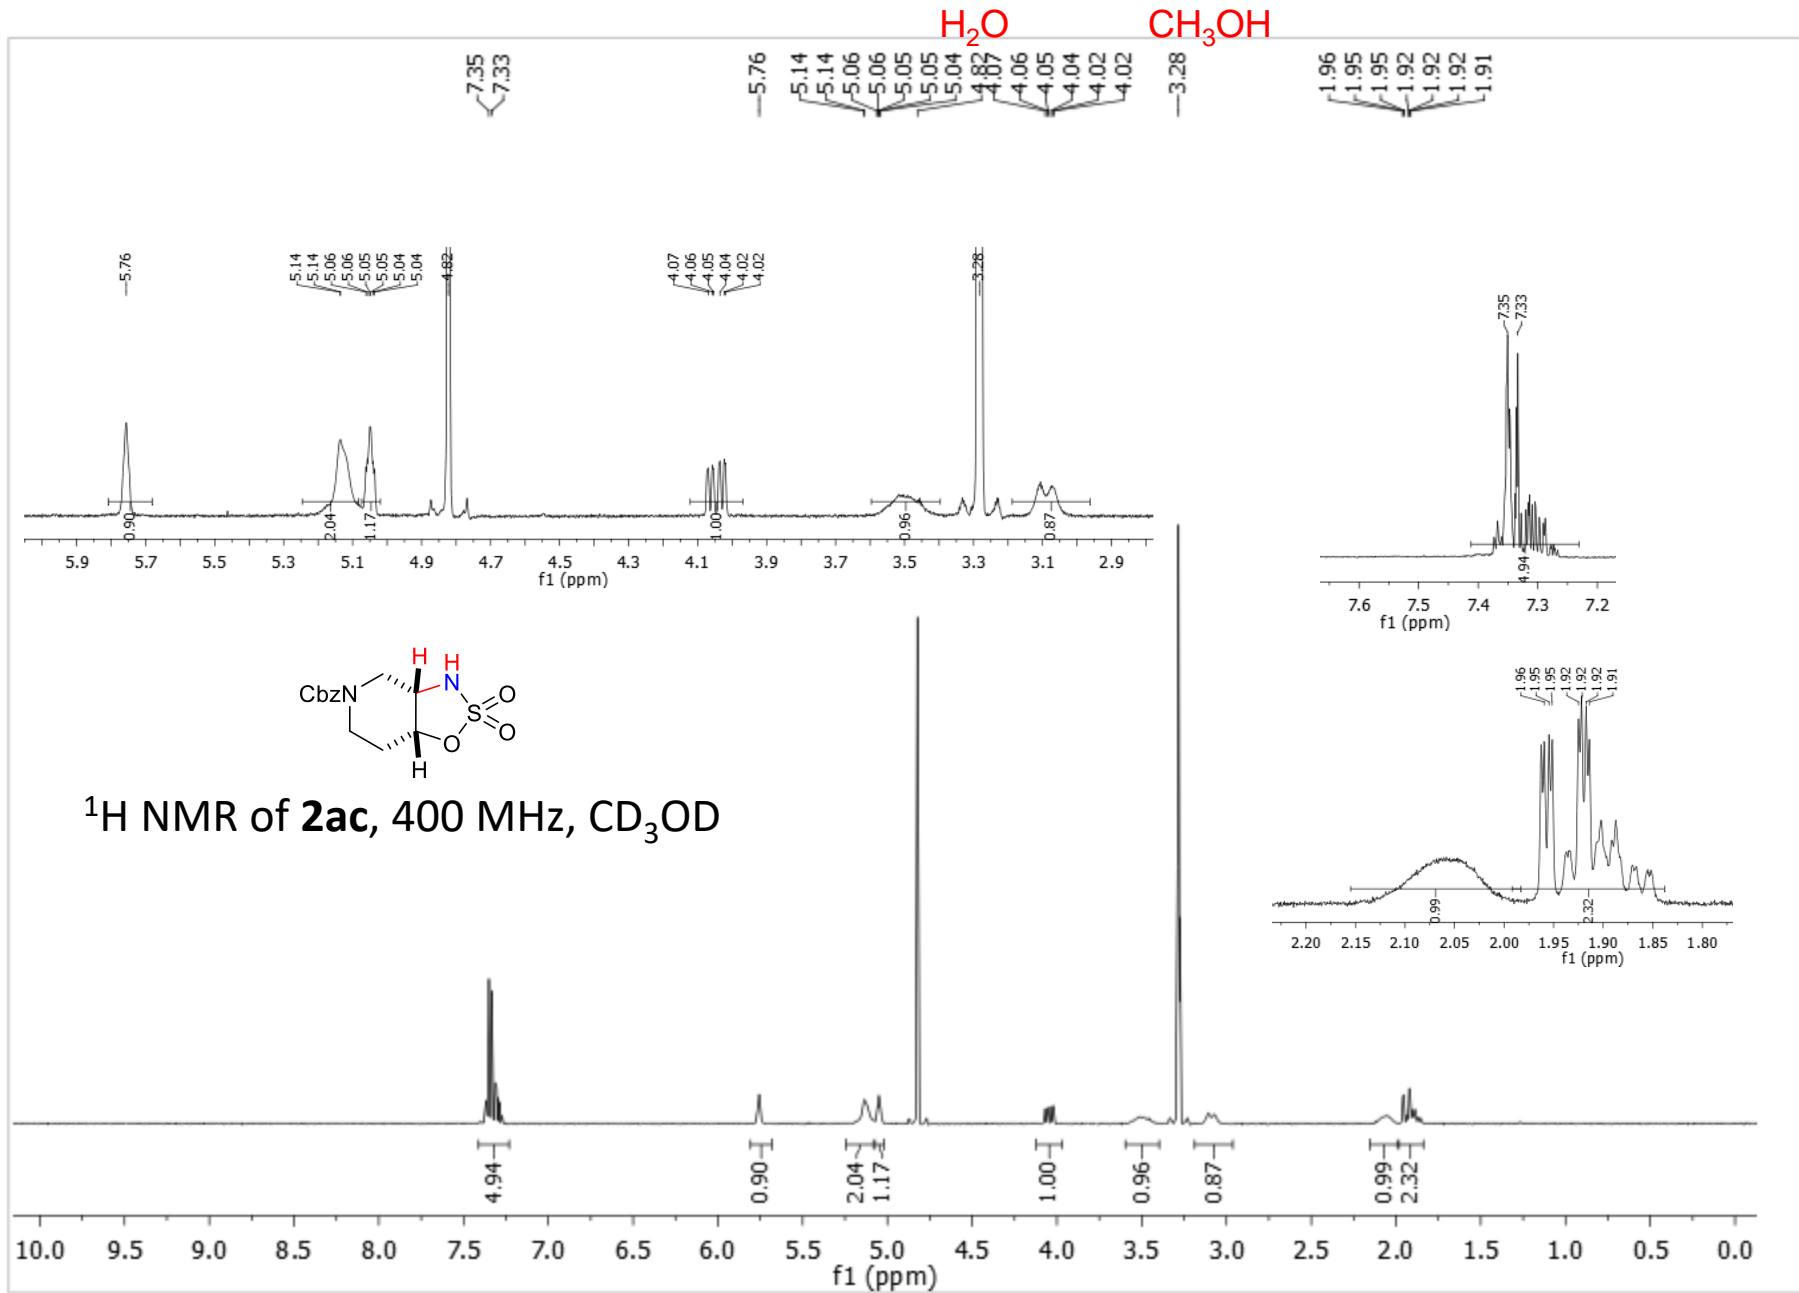

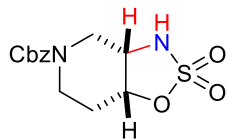

$^{13}\text{C}$  NMR of **2ac**, 150 MHz,  $\text{C}_6\text{D}_6$

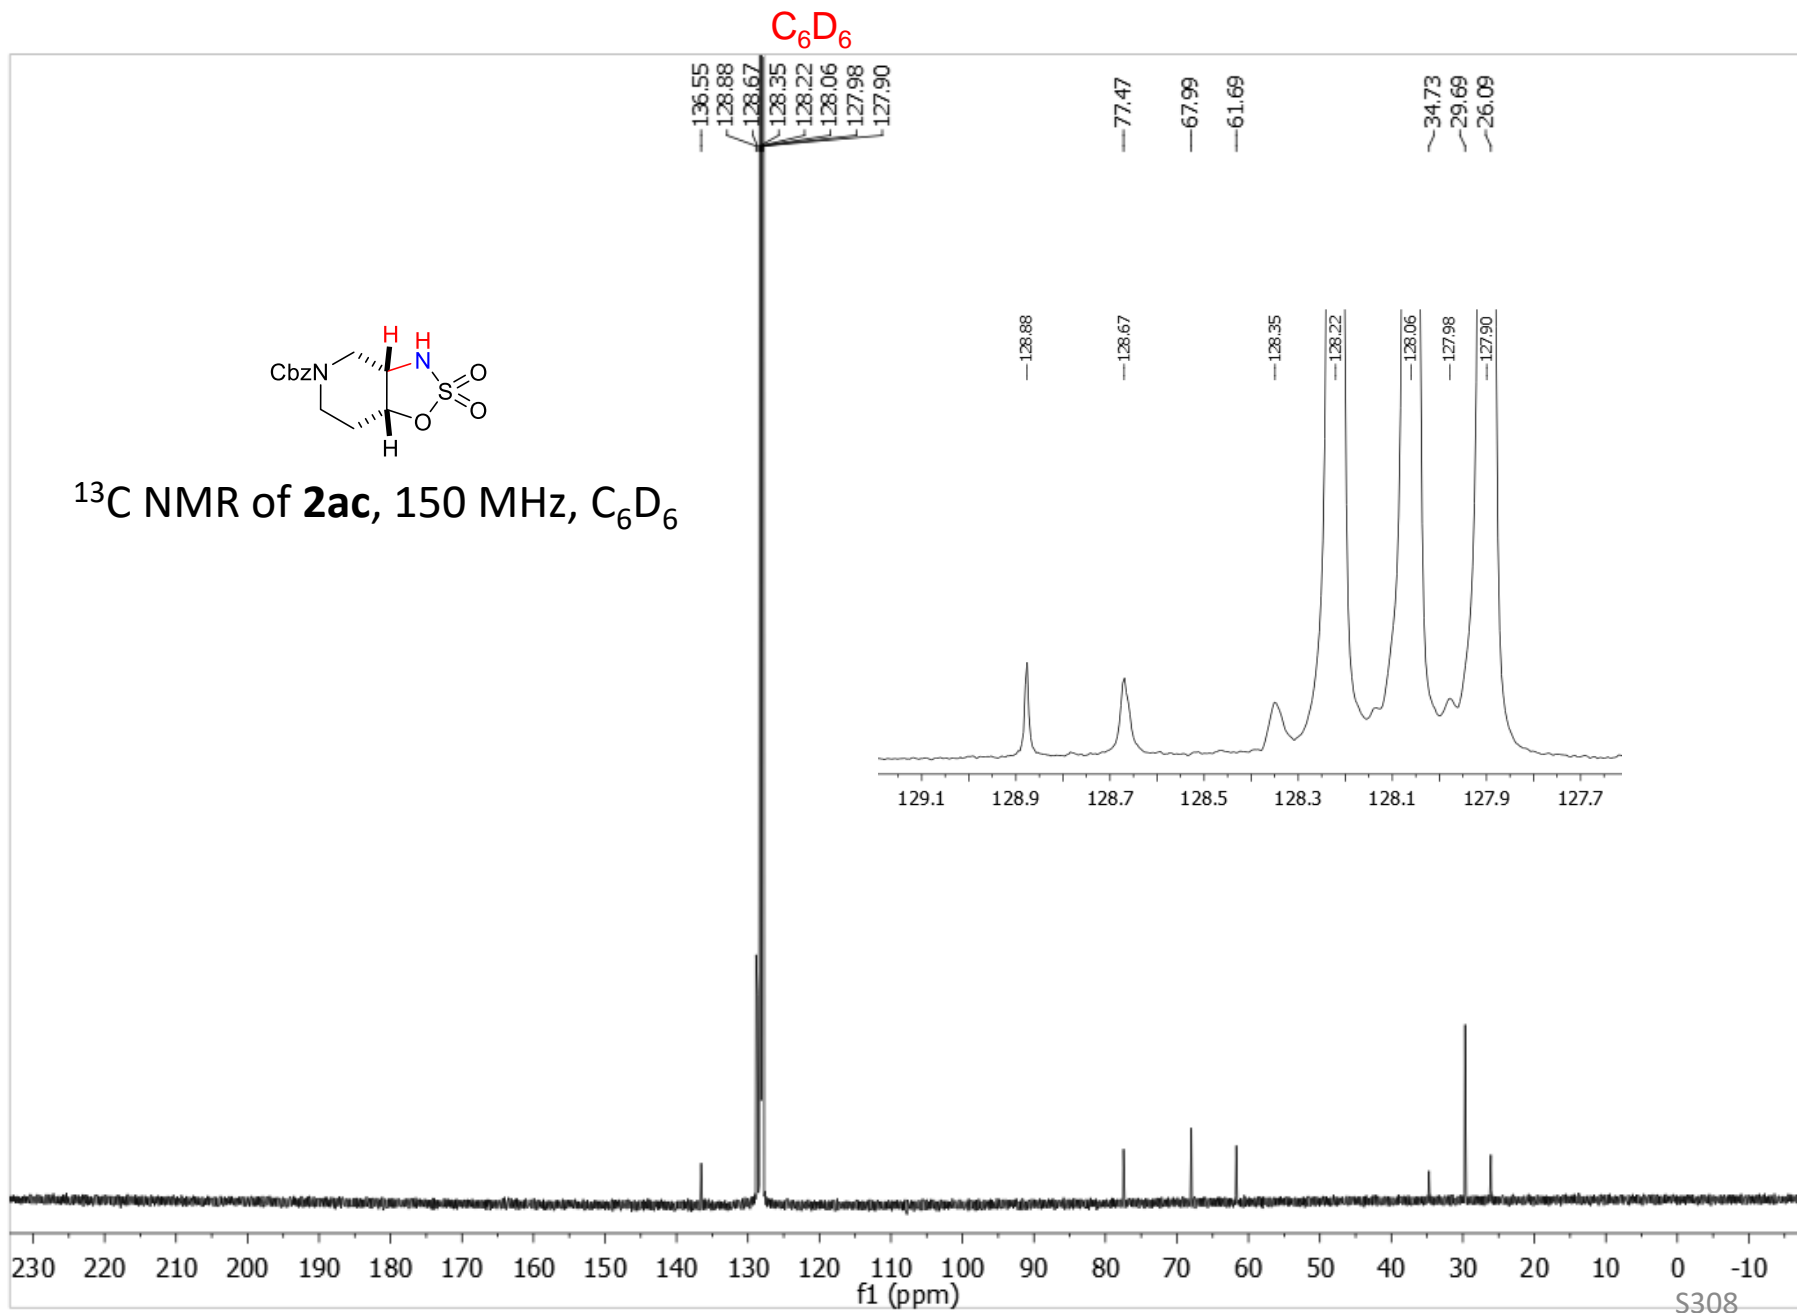

K0L-374-ODH-20%

C:\EZStart\Projects\Default\Method\LK-2%1mL60MIN.met

C:\EZStart\Projects\Default\Data\K0L-374-ODH-20%

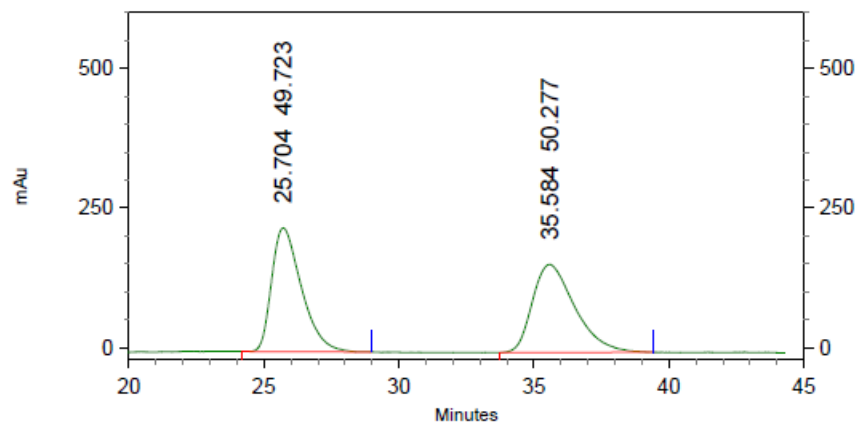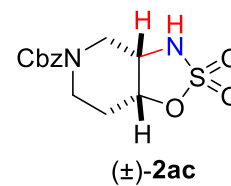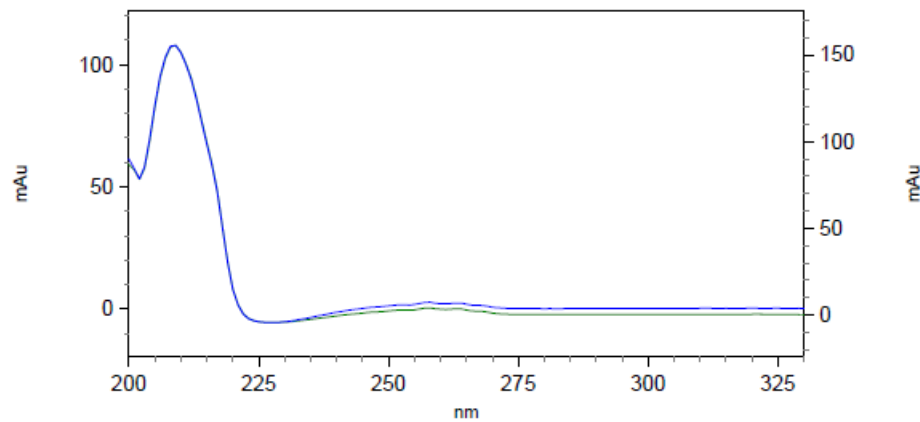

3: 207 nm, 4 nm

Results

| Name | Retention Time | Area Percent | Pk # |
|------|----------------|--------------|------|
|      | 25.704         | 49.723       | 1    |
|      | 35.584         | 50.277       | 2    |

|        |  |         |  |
|--------|--|---------|--|
| Totals |  | 100.000 |  |
|--------|--|---------|--|

K0L-373-ODH-20%

C:\EZStart\Projects\Default\Method\LK-2%1mL60MIN.met

C:\EZStart\Projects\Default\Data\K0L-373-ODH-20%

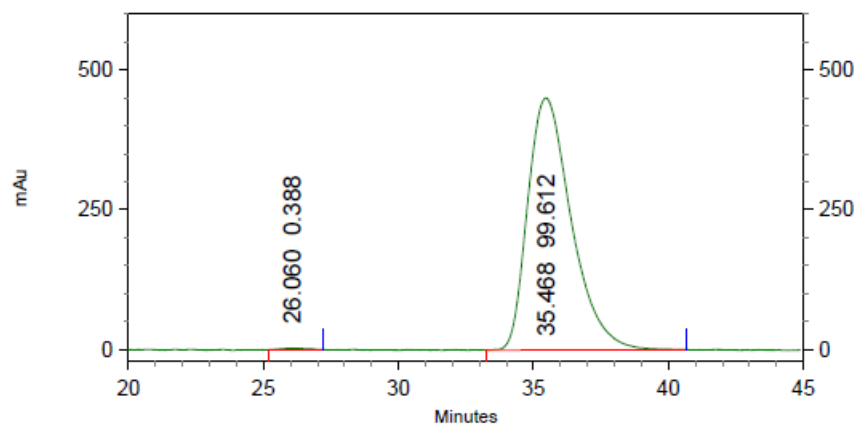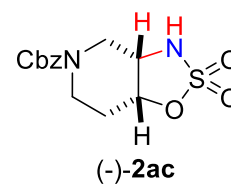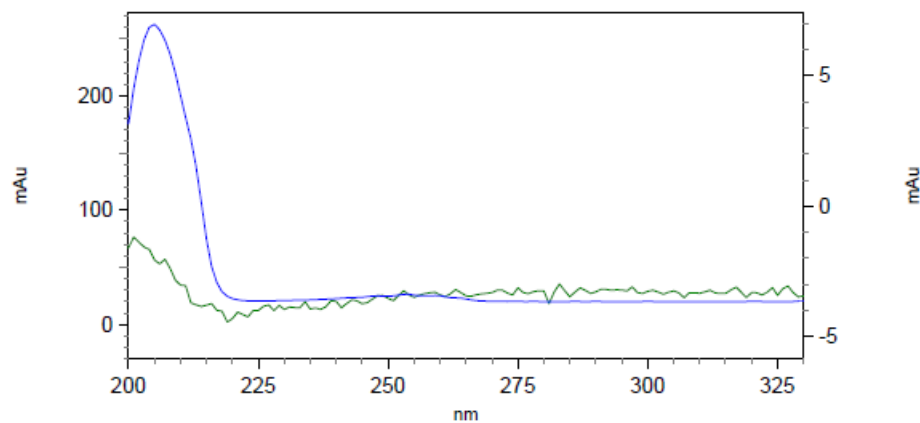

3: 207 nm, 4 nm

Results

| Name | Retention Time | Area Percent | Pk # |
|------|----------------|--------------|------|
|      | 26.060         | 0.388        | 1    |
|      | 35.468         | 99.612       | 2    |

|        |  |         |  |
|--------|--|---------|--|
| Totals |  | 100.000 |  |
|--------|--|---------|--|

CHCl<sub>3</sub>

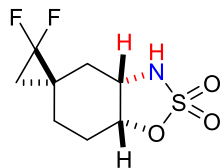

<sup>1</sup>H NMR of **2ad**, 500 MHz, CDCl<sub>3</sub>

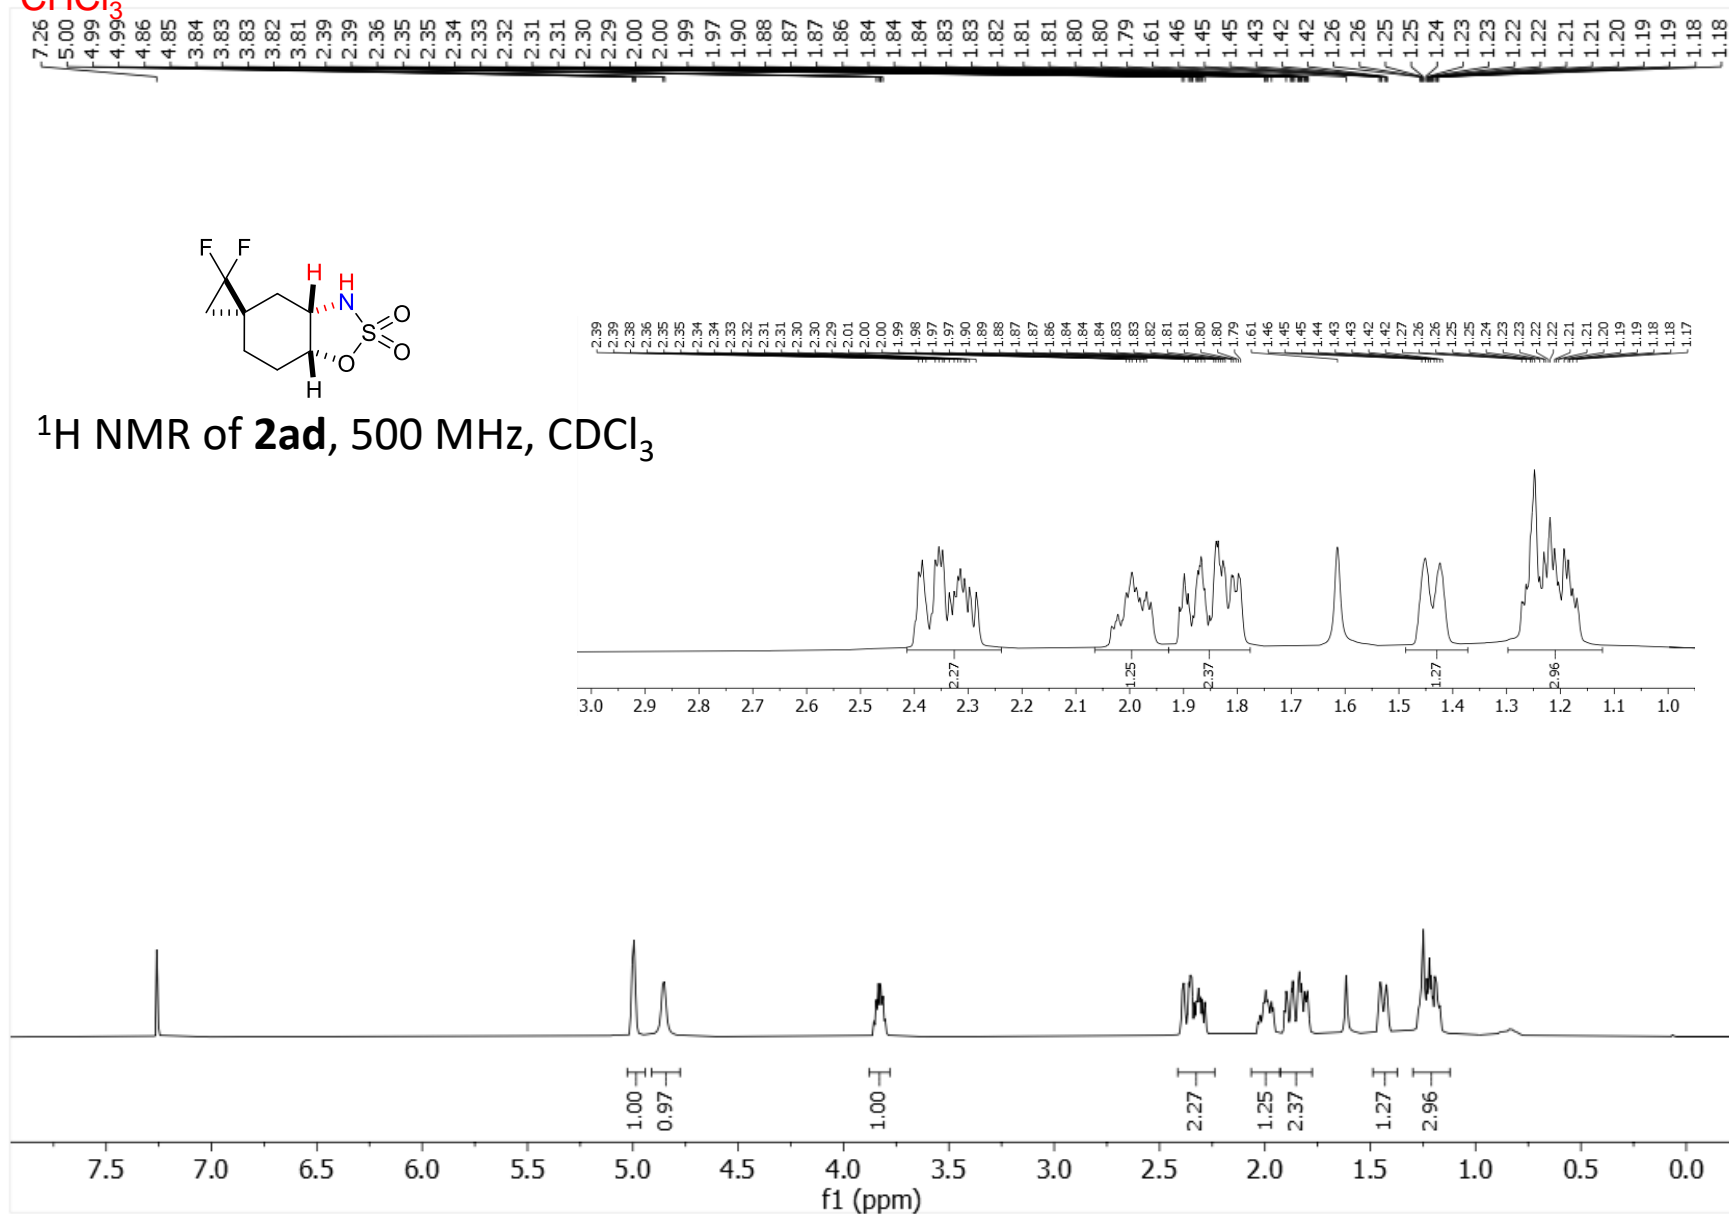



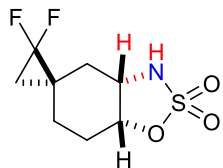

$^{13}\text{C}$  NMR of **2ad**, 125 MHz,  $\text{CDCl}_3$

$\text{CDCl}_3$

117.74  
115.44  
113.14

83.47  
77.41  
77.16  
76.91

56.27

30.87  
30.83  
26.76  
25.47  
25.39  
25.32  
22.59  
22.56  
22.18  
22.09  
22.01

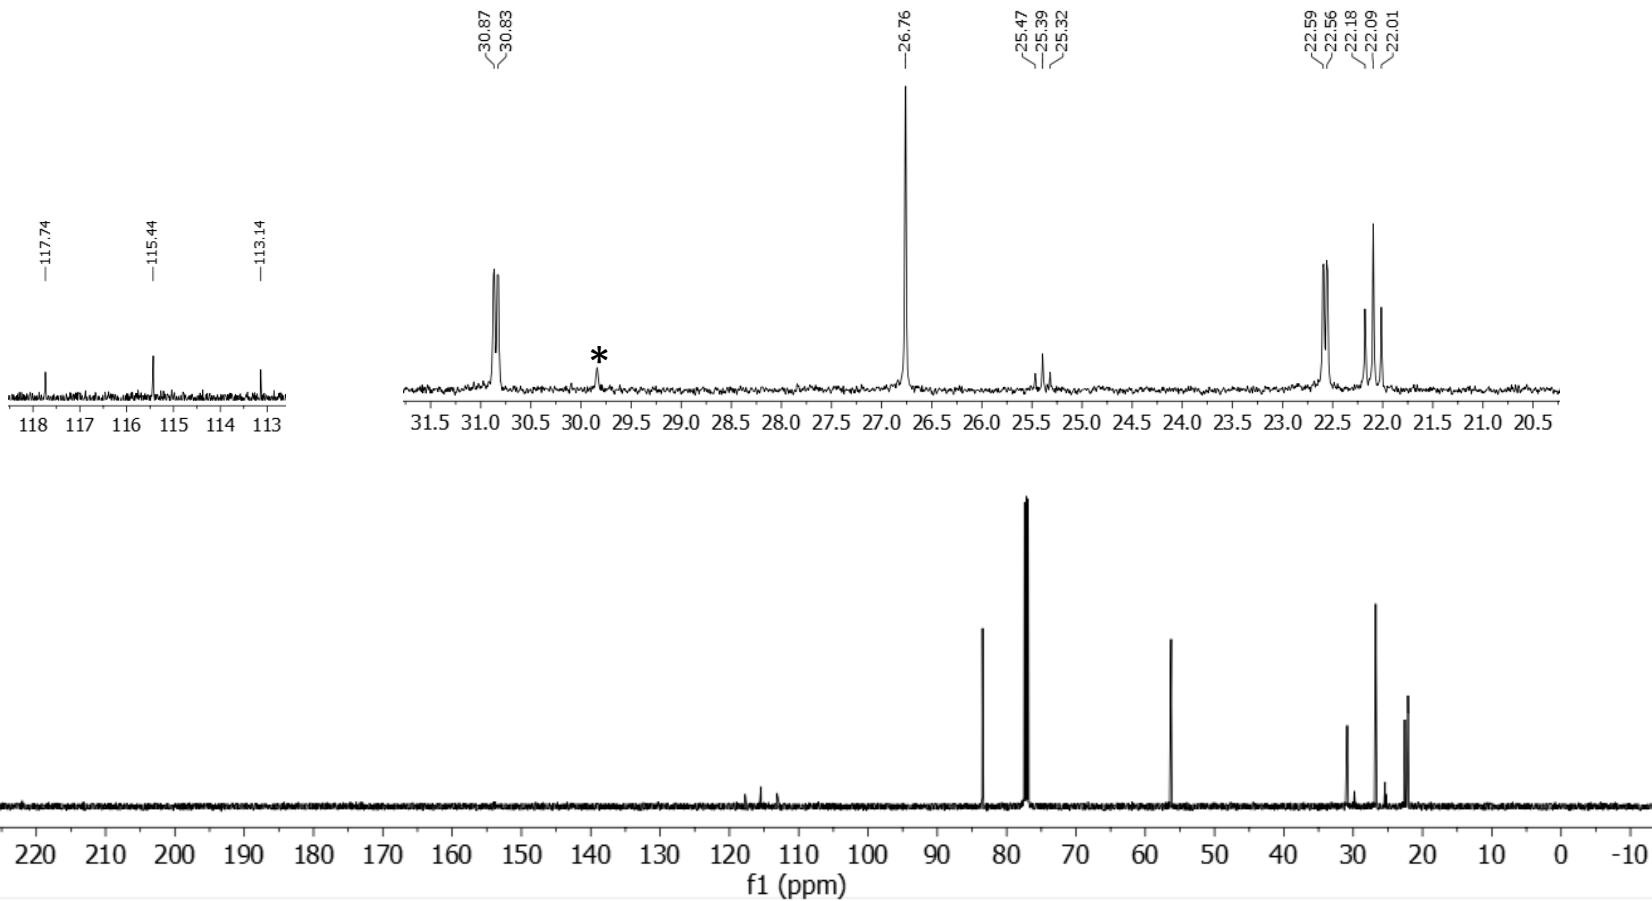

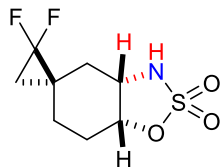

$^{19}\text{F}$  NMR of **2ad**, 470 MHz,  $\text{CDCl}_3$

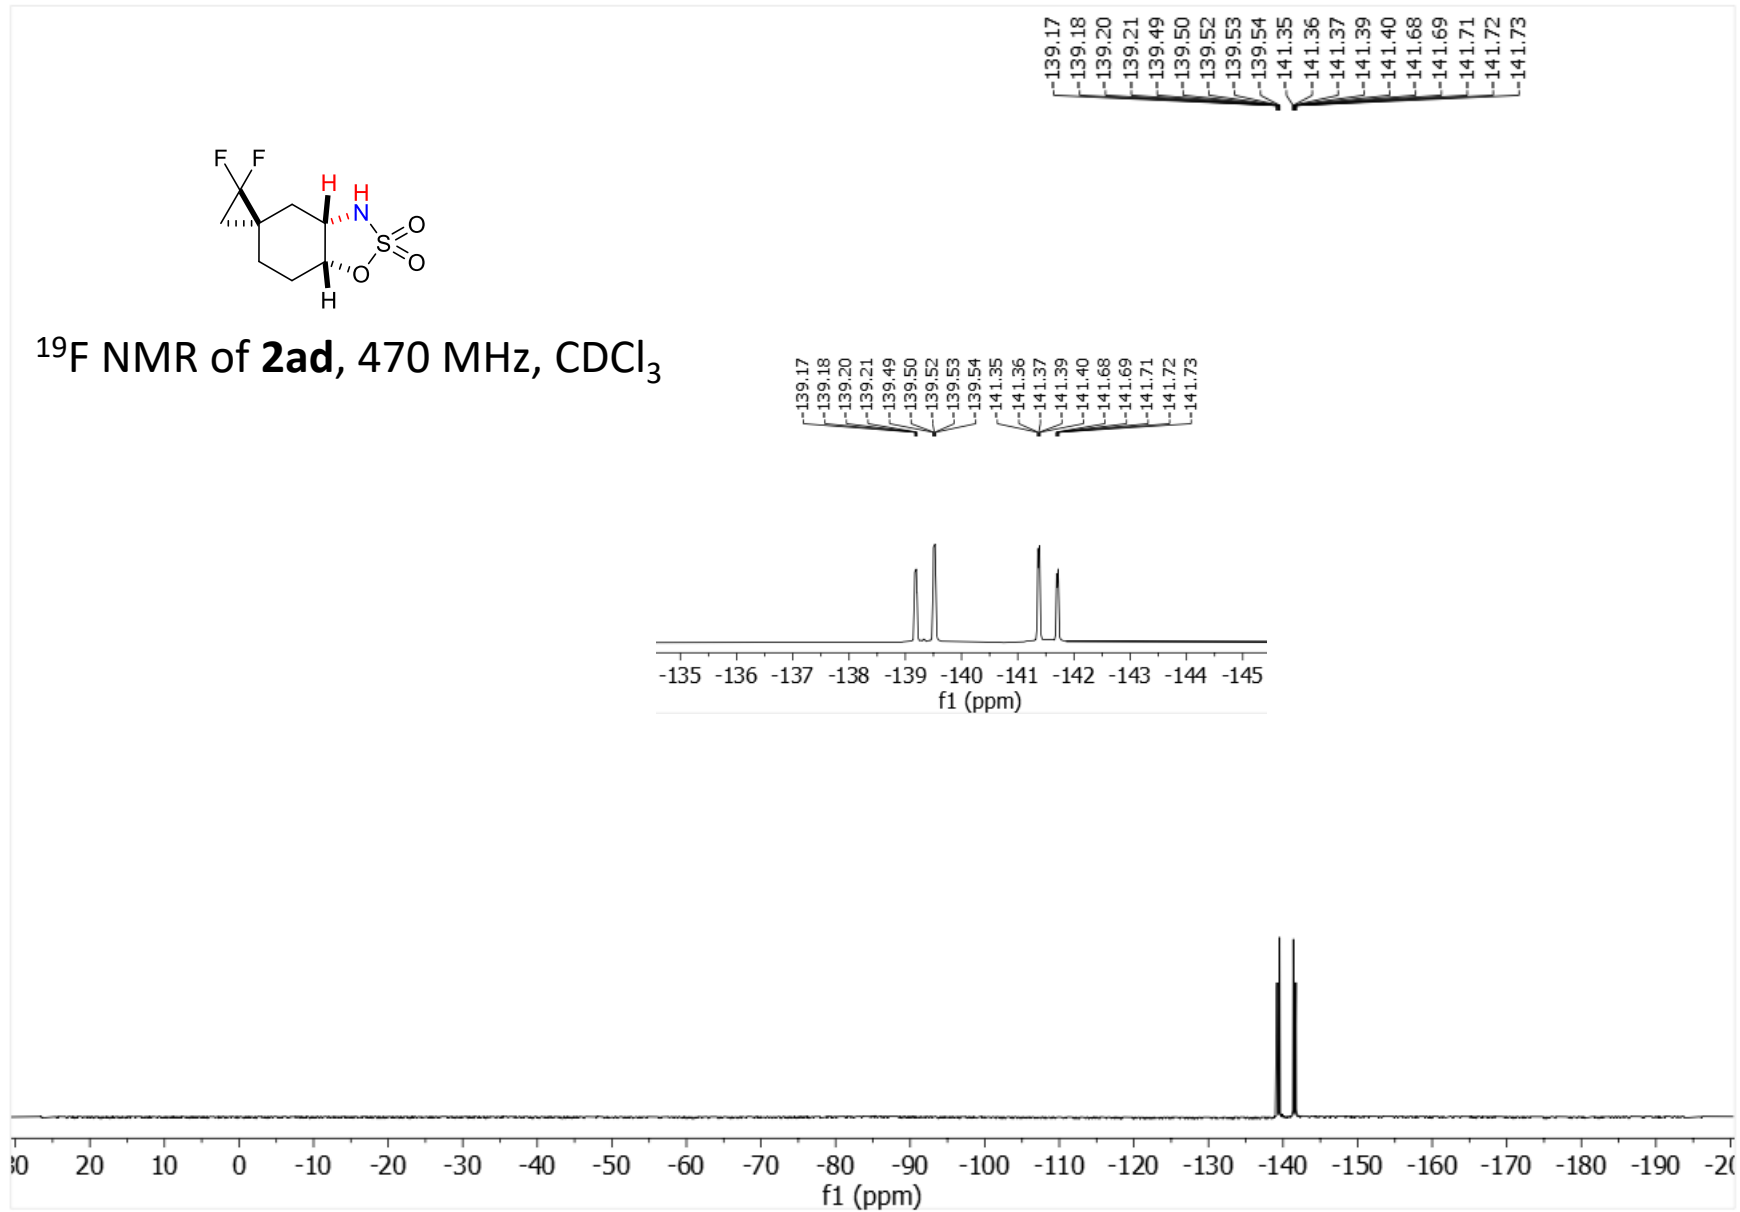

CHCl<sub>3</sub>

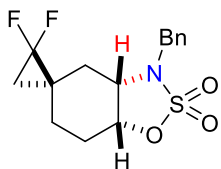

<sup>1</sup>H NMR of *N*-Bn-2ad, 600 MHz, CDCl<sub>3</sub>

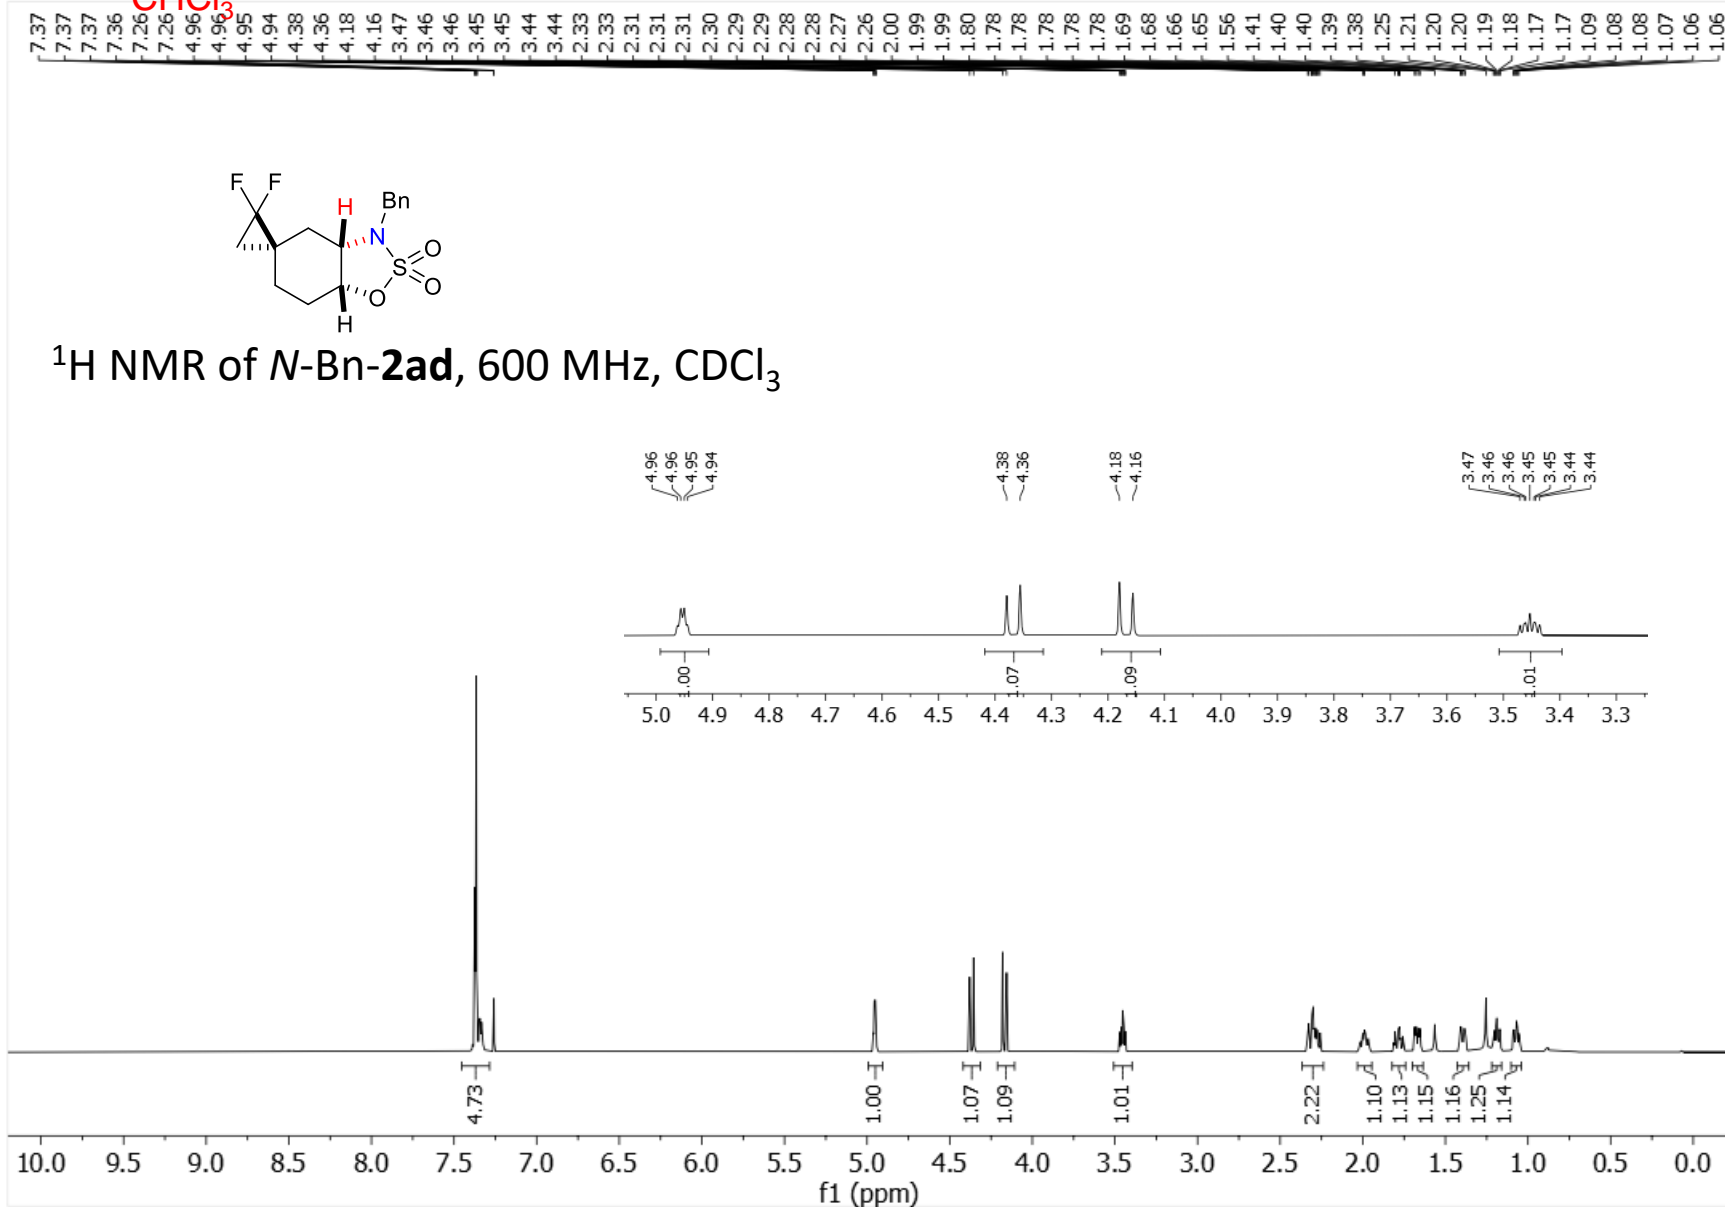

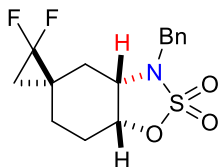

$^{13}\text{C}$  NMR of *N*-Bn-2ad, 150 MHz,  $\text{CDCl}_3$

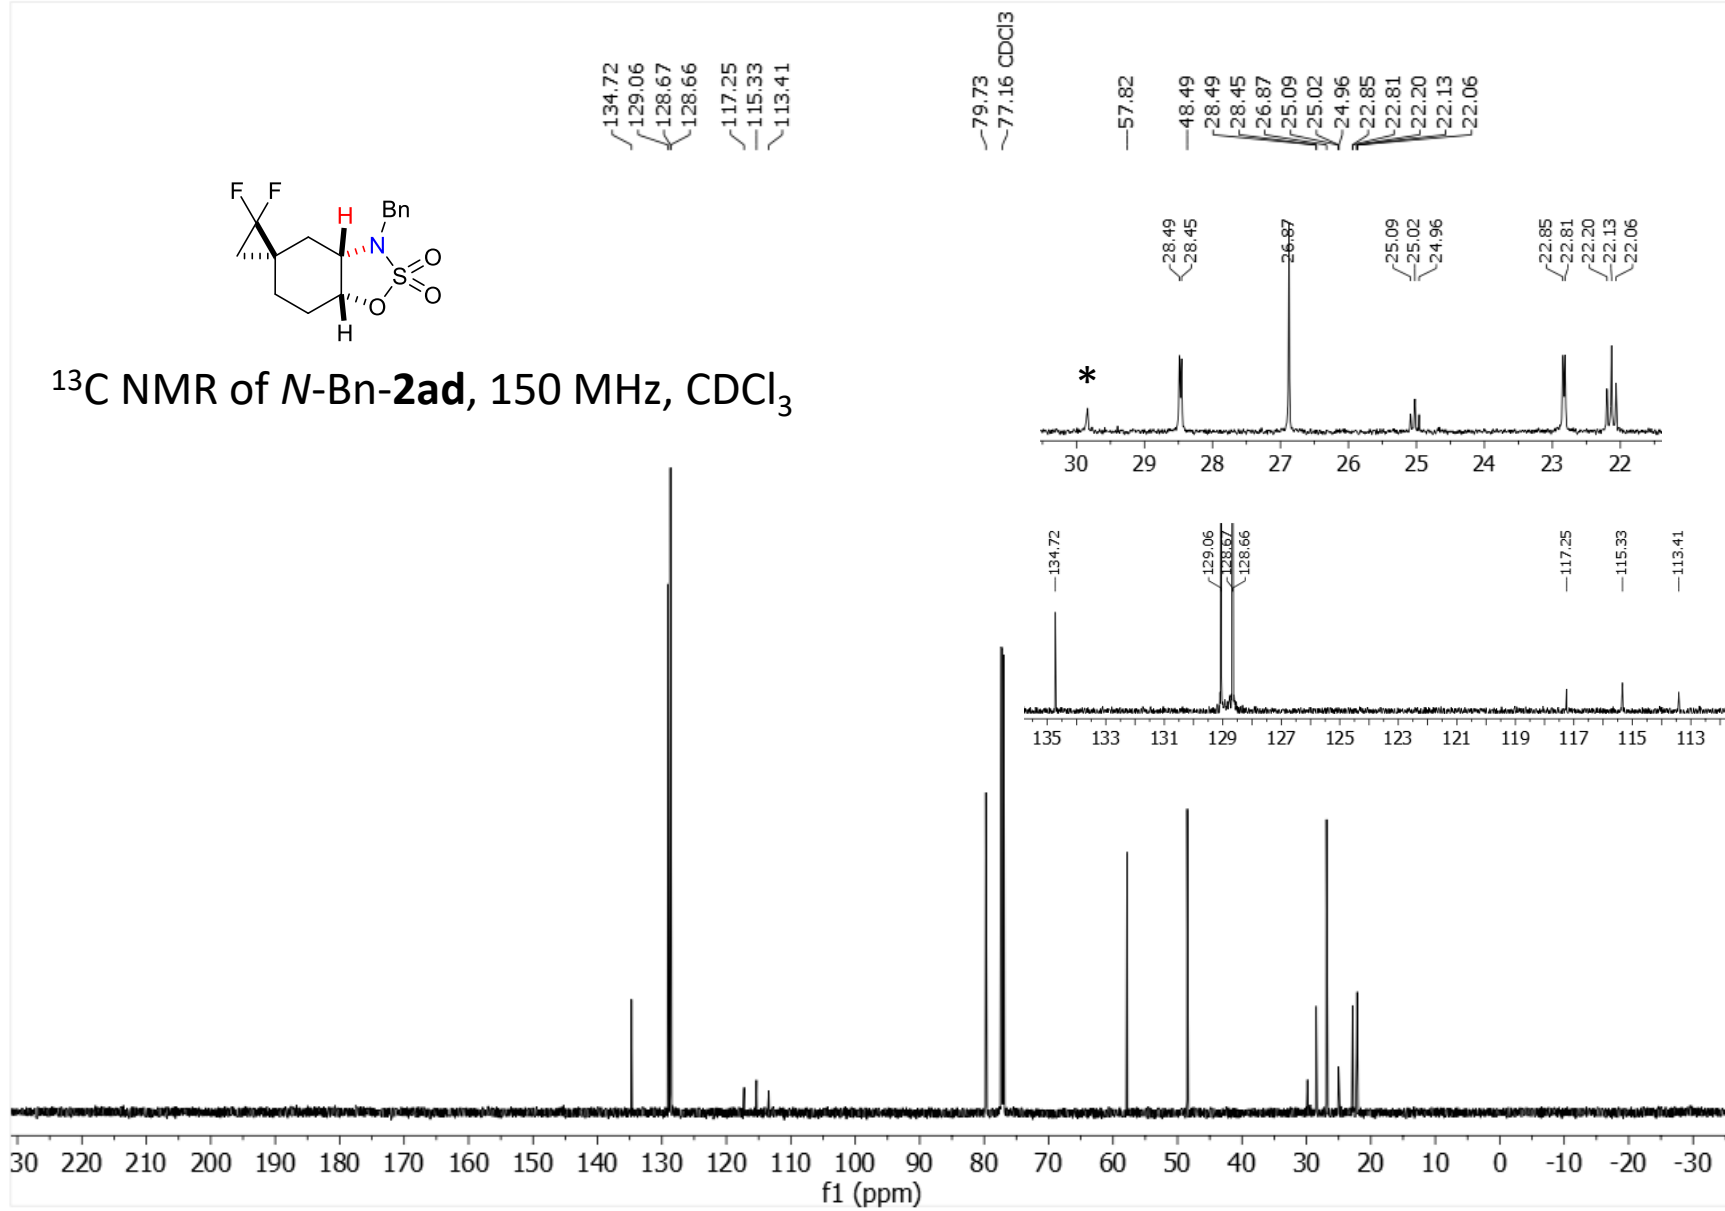



$^{19}\text{F}$  NMR of *N*-Bn-**2ad**, 564 MHz,  $\text{CDCl}_3$

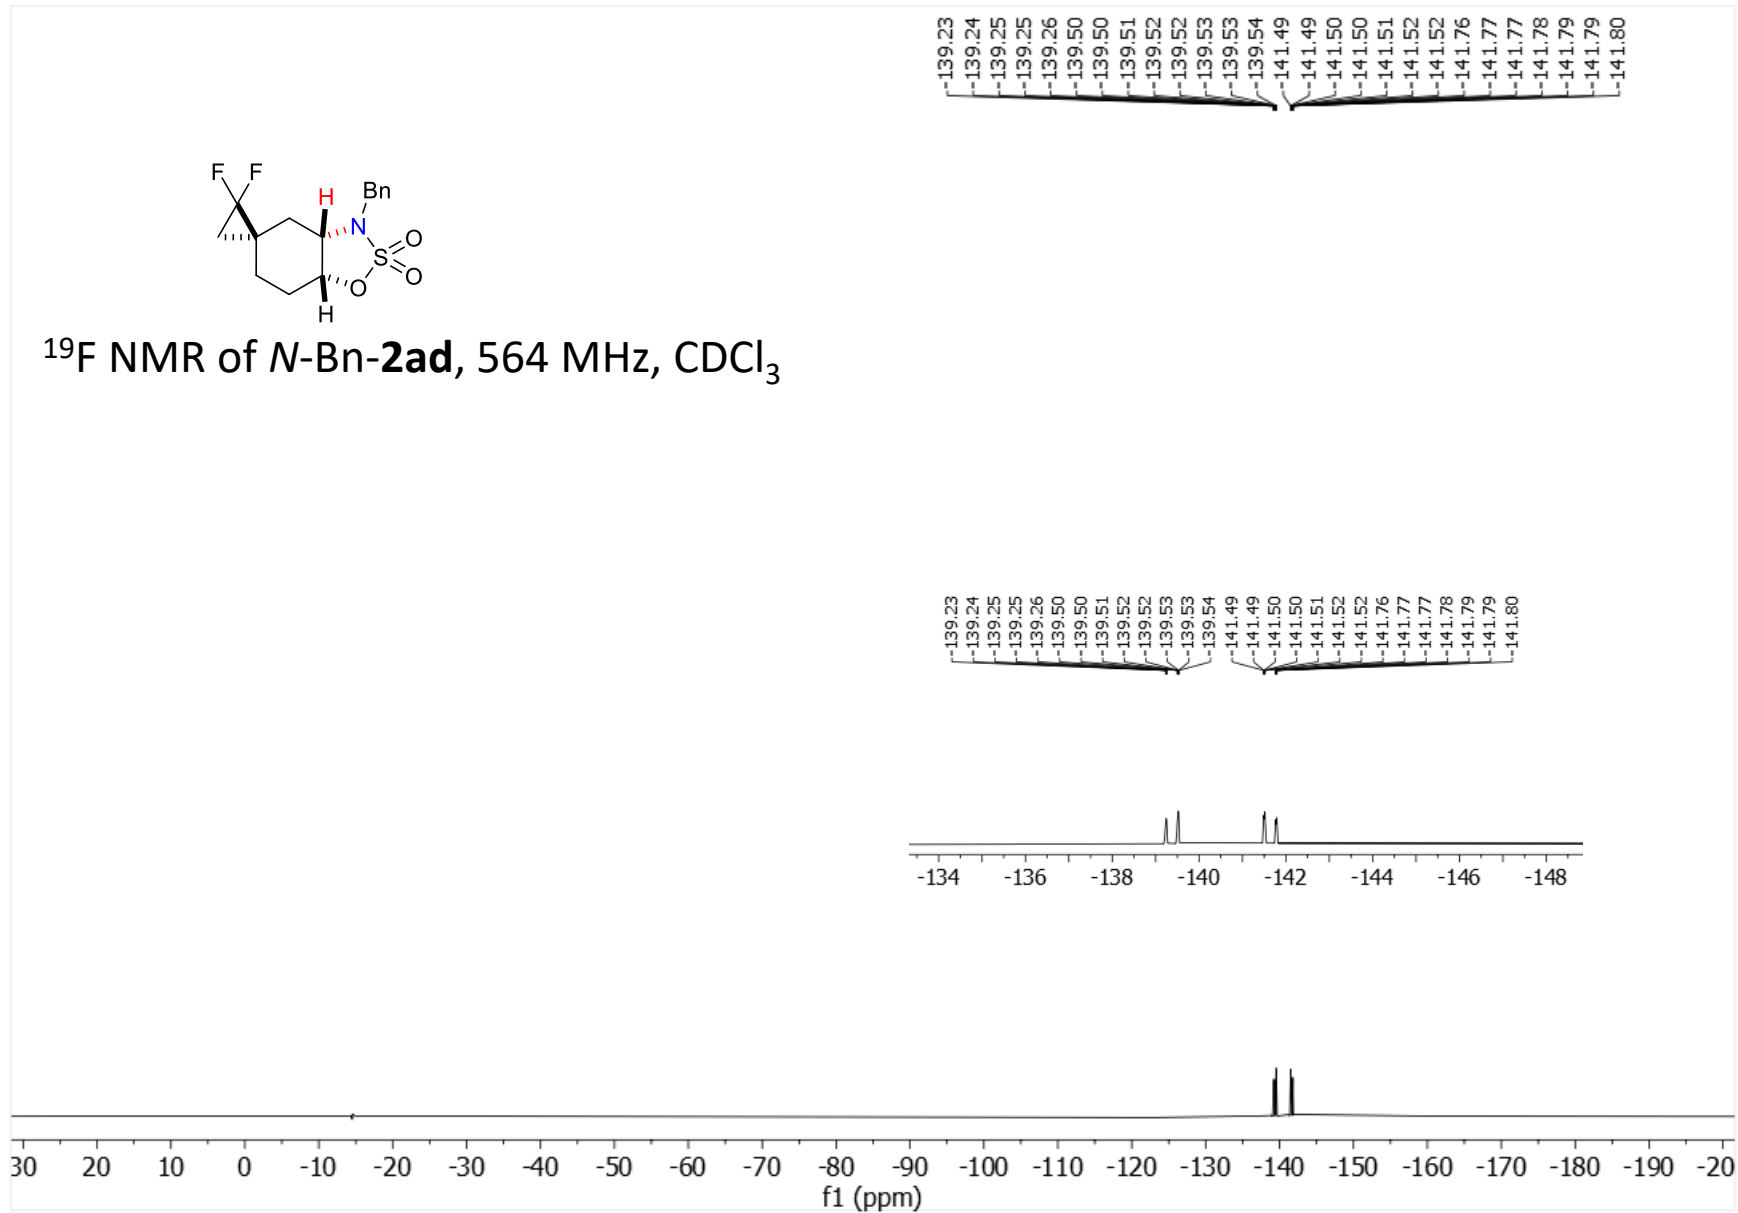

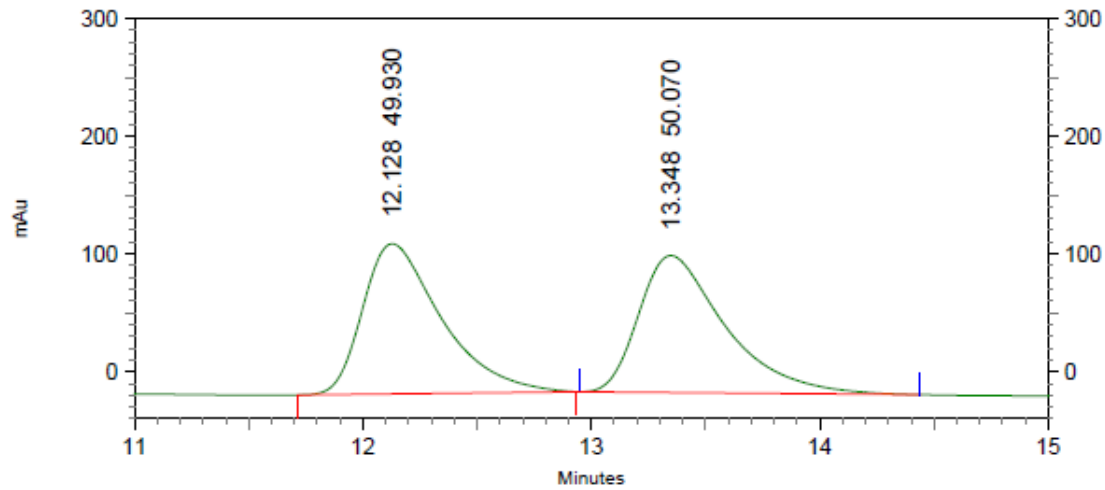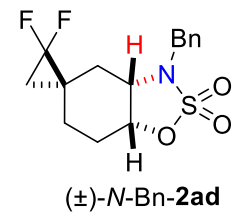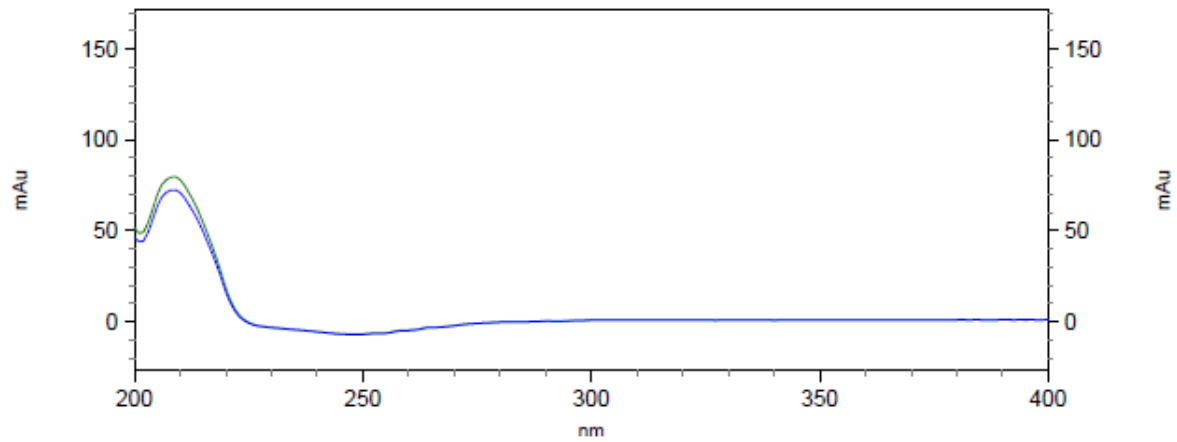

4: 215 nm, 4  
nm Results

| Pk # | Retention Time | Area Percent |
|------|----------------|--------------|
| 1    | 12.128         | 49.930       |
| 2    | 13.348         | 50.070       |

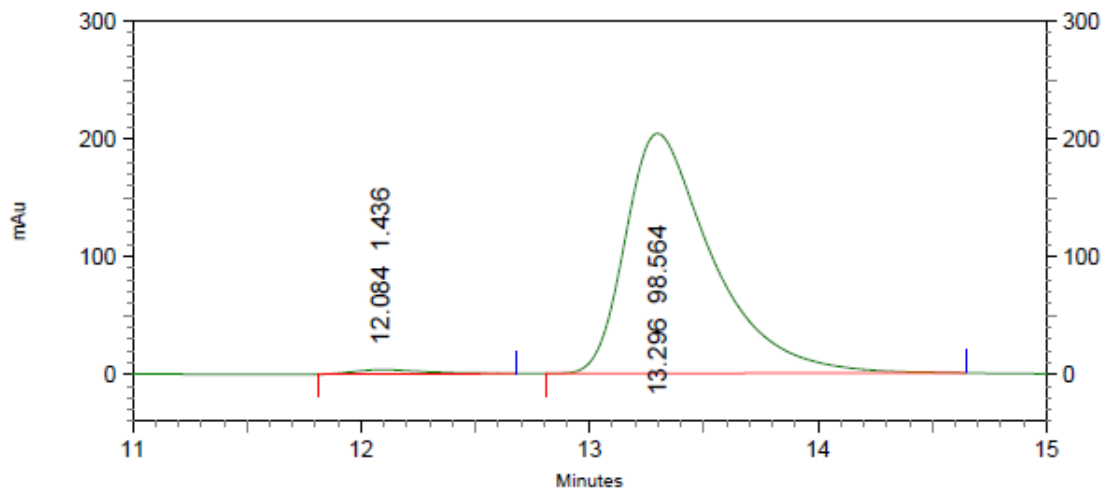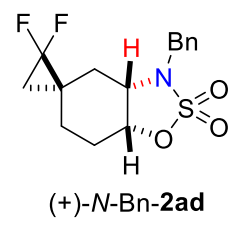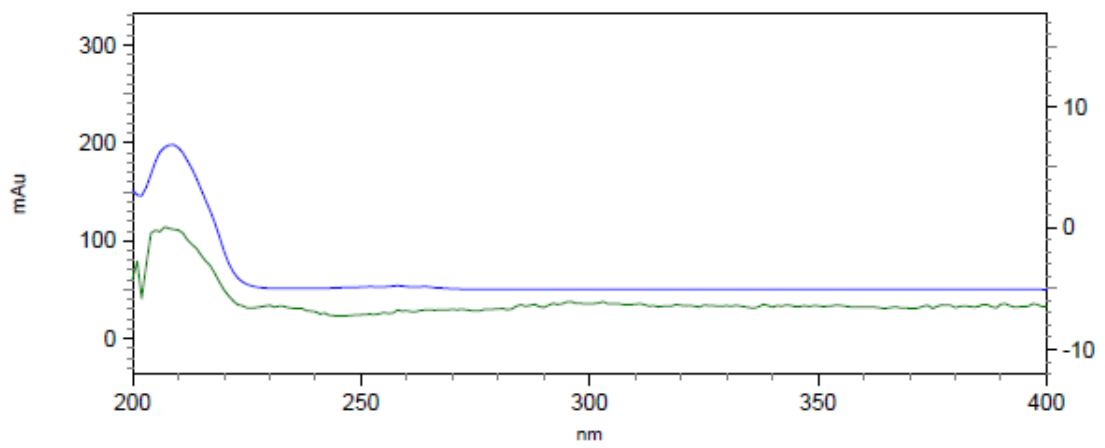

4: 215 nm, 4  
nm Results

| Pk # | Retention Time | Area Percent |
|------|----------------|--------------|
| 1    | 12.084         | 1.436        |
| 2    | 13.296         | 98.564       |

## checkCIF/PLATON report

Structure factors have been supplied for datablock(s) C15H17F2NO3S

THIS REPORT IS FOR GUIDANCE ONLY. IF USED AS PART OF A REVIEW PROCEDURE FOR PUBLICATION, IT SHOULD NOT REPLACE THE EXPERTISE OF AN EXPERIENCED CRYSTALLOGRAPHIC REFEREE.

No syntax errors found. [CIF dictionary](#) [Interpreting this report](#)

### Datablock: C15H17F2NO3S

Bond precision: C-C = 0.0029 Å Wavelength=1.54178  
Cell: a=10.0047 (7) b=10.8944 (7) c=13.8830 (9)  
alpha=90 beta=90 gamma=90  
Temperature: 173 K

|                | Calculated        | Reported          |
|----------------|-------------------|-------------------|
| Volume         | 1513.18 (17)      | 1513.18 (17)      |
| Space group    | P 21 21 21        | P 21 21 21        |
| Hall group     | P 2ac 2ab         | P 2ac 2ab         |
| Moiety formula | C15 H17 F2 N O3 S | C15 H17 F2 N O3 S |
| Sum formula    | C15 H17 F2 N O3 S | C15 H17 F2 N O3 S |
| Mr             | 329.36            | 329.35            |
| Dx, g cm-3     | 1.446             | 1.446             |
| Z              | 4                 | 4                 |
| Mu (mm-1)      | 2.223             | 2.223             |
| F000           | 688.0             | 688.0             |
| F000'          | 691.64            |                   |
| h, k, lmax     | 11, 12, 16        | 11, 12, 16        |
| Nref           | 2668 [ 1544]      | 2622              |
| Tmin, Tmax     | 0.584, 0.766      | 0.618, 0.753      |
| Tmin'          | 0.374             |                   |

Correction method= # Reported T Limits: Tmin=0.618 Tmax=0.753  
AbsCorr = MULTI-SCAN

Data completeness= 1.70/0.98 Theta(max)= 66.631

R(reflections)= 0.0228 ( 2592) wR2(reflections)= 0.0686 ( 2622)

S = 1.038 Npar= 200

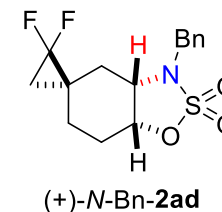

The following ALERTS were generated. Each ALERT has the format  
**test-name\_ALERT\_alert-type\_alert-level.**  
Click on the hyperlinks for more details of the test.



---

### ● Alert level C

|                   |                                                 |       |           |
|-------------------|-------------------------------------------------|-------|-----------|
| PLAT911 ALERT 3 C | Missing FCF Refl Between Thmin & STh/L=         | 0.595 | 23 Report |
| PLAT913 ALERT 3 C | Missing # of Very Strong Reflections in FCF ... |       | 9 Note    |

---

### ● Alert level G

|                   |                                                  |               |              |
|-------------------|--------------------------------------------------|---------------|--------------|
| PLAT791 ALERT 4 G | Model has Chirality at C3                        | (Sohnke SpGr) | R Verify     |
| PLAT791 ALERT 4 G | Model has Chirality at C6                        | (Sohnke SpGr) | R Verify     |
| PLAT791 ALERT 4 G | Model has Chirality at C7                        | (Sohnke SpGr) | S Verify     |
| PLAT909 ALERT 3 G | Percentage of I>2sig(I) Data at Theta(Max) Still |               | 97% Note     |
| PLAT933 ALERT 2 G | Number of OMIT Records in Embedded .res File ... |               | 2 Note       |
| PLAT965 ALERT 2 G | The SHELXL WEIGHT Optimisation has not Converged |               | Please Check |
| PLAT978 ALERT 2 G | Number C-C Bonds with Positive Residual Density. |               | 6 Info       |

---

- 0 **ALERT level A** = Most likely a serious problem - resolve or explain
- 0 **ALERT level B** = A potentially serious problem, consider carefully
- 2 **ALERT level C** = Check. Ensure it is not caused by an omission or oversight
- 7 **ALERT level G** = General information/check it is not something unexpected

- 0 ALERT type 1 CIF construction/syntax error, inconsistent or missing data
  - 3 ALERT type 2 Indicator that the structure model may be wrong or deficient
  - 3 ALERT type 3 Indicator that the structure quality may be low
  - 3 ALERT type 4 Improvement, methodology, query or suggestion
  - 0 ALERT type 5 Informative message, check
- 



It is advisable to attempt to resolve as many as possible of the alerts in all categories. Often the minor alerts point to easily fixed oversights, errors and omissions in your CIF or refinement strategy, so attention to these fine details can be worthwhile. In order to resolve some of the more serious problems it may be necessary to carry out additional measurements or structure refinements. However, the purpose of your study may justify the reported deviations and the more serious of these should normally be commented upon in the discussion or experimental section of a paper or in the "special\_details" fields of the CIF. checkCIF was carefully designed to identify outliers and unusual parameters, but every test has its limitations and alerts that are not important in a particular case may appear. Conversely, the absence of alerts does not guarantee there are no aspects of the results needing attention. It is up to the individual to critically assess their own results and, if necessary, seek expert advice.

#### Publication of your CIF in IUCr journals

A basic structural check has been run on your CIF. These basic checks will be run on all CIFs submitted for publication in IUCr journals (*Acta Crystallographica*, *Journal of Applied Crystallography*, *Journal of Synchrotron Radiation*); however, if you intend to submit to *Acta Crystallographica Section C* or *E* or *IUCrData*, you should make sure that full publication checks are run on the final version of your CIF prior to submission.

#### Publication of your CIF in other journals

Please refer to the *Notes for Authors* of the relevant journal for any special instructions relating to CIF submission.

PLATON version of 16/07/2020; check.def file version of 12/07/2020

Datablock C15H17F2NO3S - ellipsoid plot

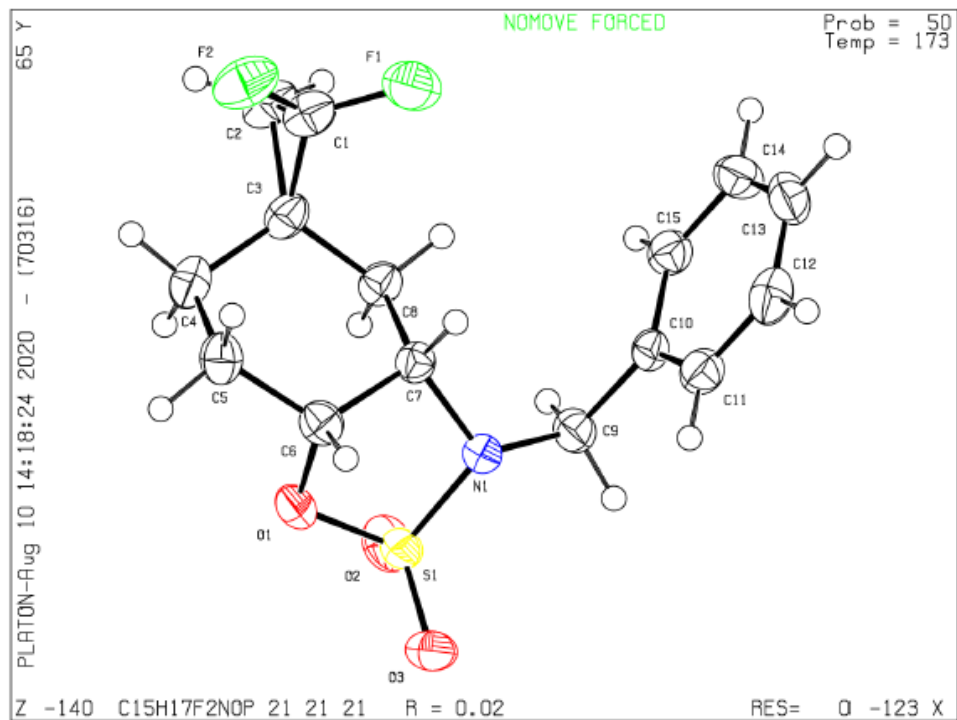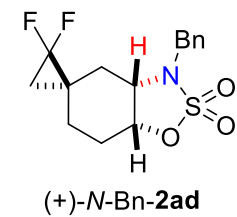

CHCl<sub>3</sub>

-7.26

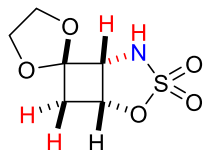

5.01  
4.98  
4.97  
4.97  
4.96  
4.96  
4.95  
4.08  
4.01  
4.00  
3.94  
3.93  
3.89  
3.87  
3.87  
3.00  
3.00  
2.99  
2.98  
2.98  
2.97  
2.96  
2.87  
2.87  
2.87  
2.85  
2.85  
2.84

<sup>1</sup>H NMR of **2ae**, 600 MHz, CDCl<sub>3</sub>

4.29  
4.28  
4.10  
4.09  
4.09  
4.08  
4.08  
4.08  
4.07  
4.06  
4.02  
4.01  
4.00  
3.99  
3.95  
3.94  
3.94  
3.93  
3.92  
3.92  
3.90  
3.89  
3.87  
3.86

3.01  
3.00  
3.00  
2.99  
2.98  
2.98  
2.97  
2.96  
2.87  
2.87  
2.85  
2.85  
2.84

5.01  
4.98  
4.97  
4.97  
4.96  
4.96  
4.95

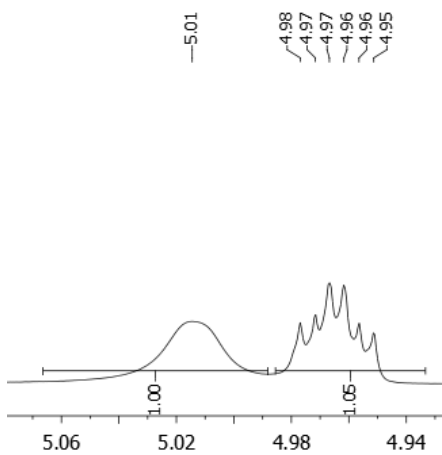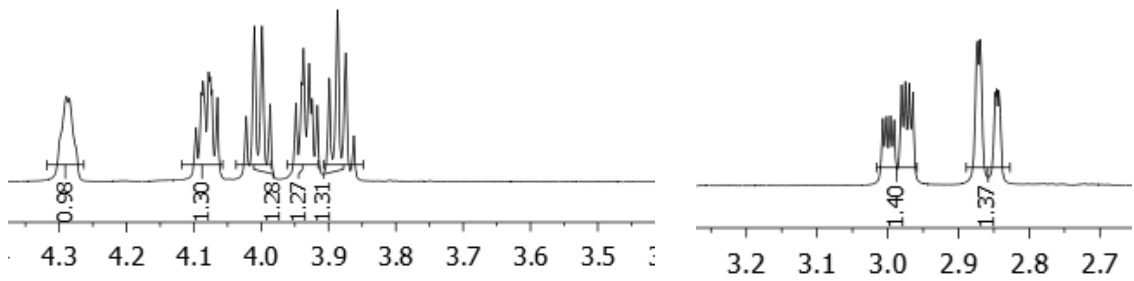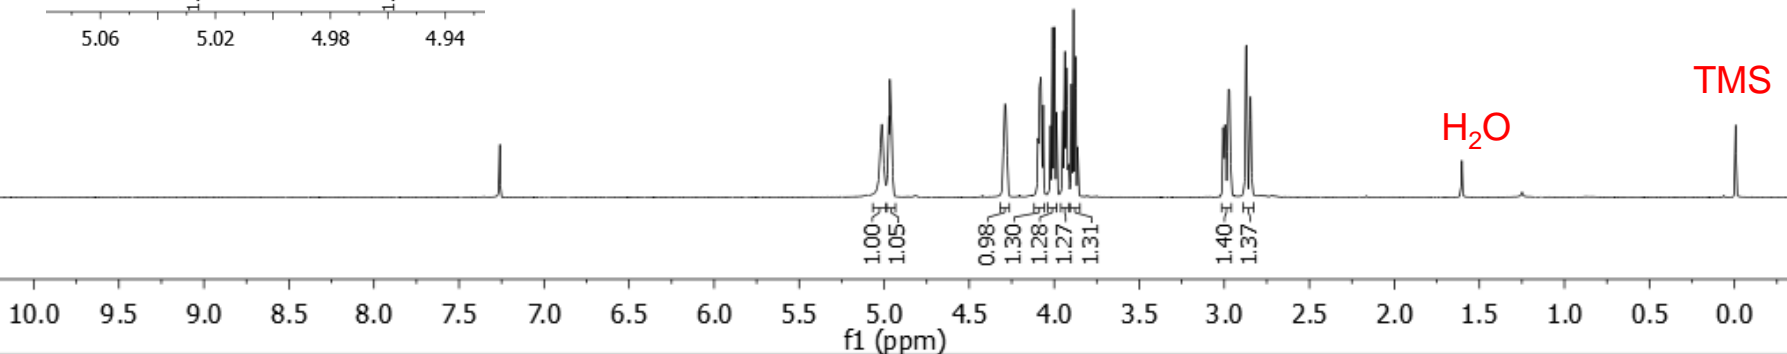

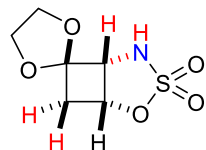

<sup>13</sup>C NMR of **2ae**, 150 MHz, CDCl<sub>3</sub>

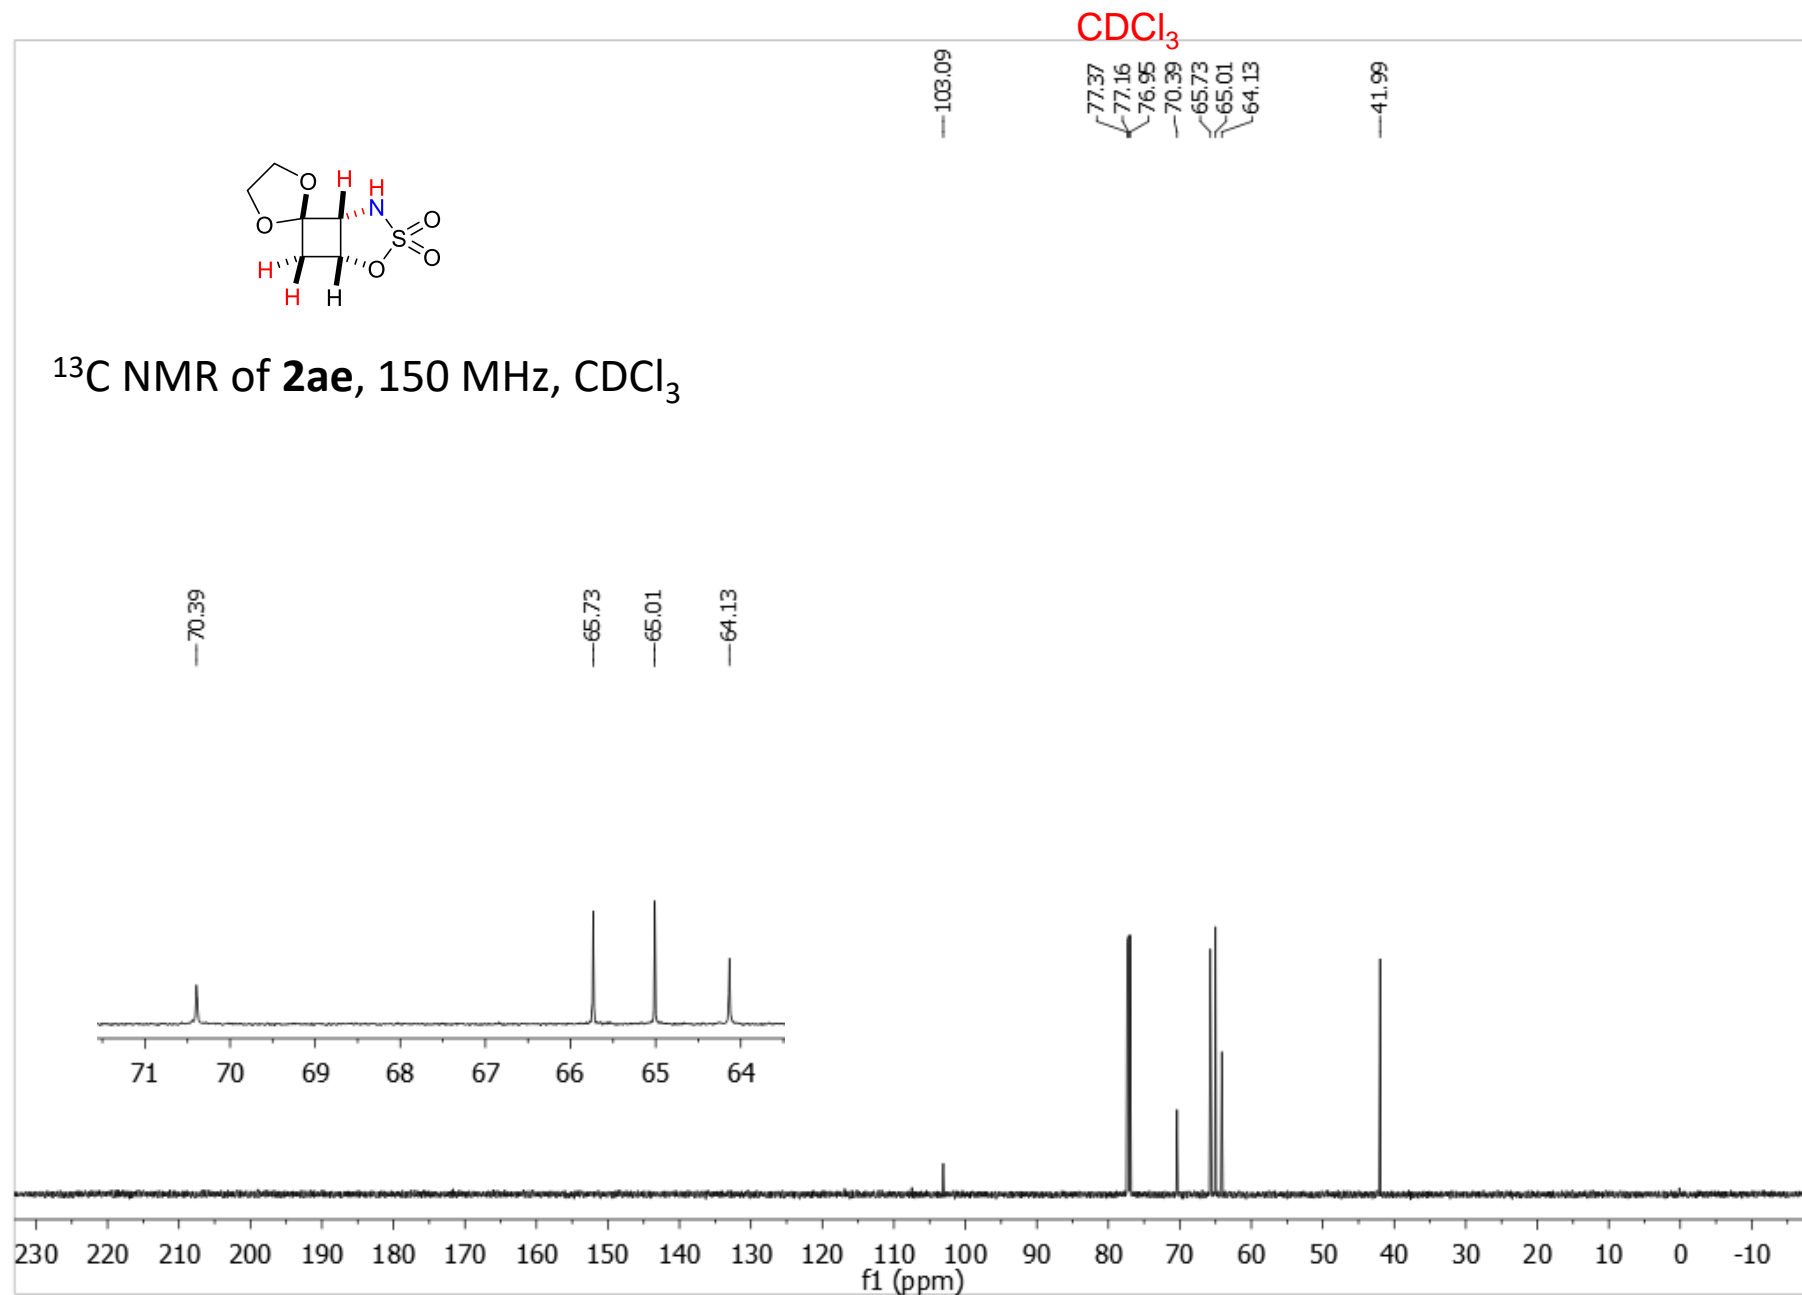

## checkCIF/PLATON report

Structure factors have been supplied for datablock(s) C6H9NO5S

THIS REPORT IS FOR GUIDANCE ONLY. IF USED AS PART OF A REVIEW PROCEDURE FOR PUBLICATION, IT SHOULD NOT REPLACE THE EXPERTISE OF AN EXPERIENCED CRYSTALLOGRAPHIC REFEREE.

No syntax errors found. [CIF dictionary](#) [Interpreting this report](#)

### Datablock: C6H9NO5S

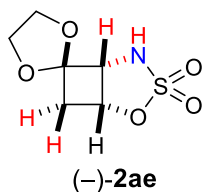

Bond precision: C-C = 0.0042 Å      Wavelength=1.54178  
Cell:            a=5.2382(3)      b=10.1883(6)      c=15.0152(9)  
                  alpha=90      beta=90      gamma=90  
Temperature:    100 K

|                        | Calculated   | Reported     |
|------------------------|--------------|--------------|
| Volume                 | 801.34(8)    | 801.34(8)    |
| Space group            | P 21 21 21   | P 21 21 21   |
| Hall group             | P 2ac 2ab    | P 2ac 2ab    |
| Moiety formula         | C6 H9 N O5 S | C6 H9 N O5 S |
| Sum formula            | C6 H9 N O5 S | C6 H9 N O5 S |
| Mr                     | 207.20       | 207.20       |
| Dx, g cm <sup>-3</sup> | 1.717        | 1.717        |
| Z                      | 4            | 4            |
| Mu (mm <sup>-1</sup> ) | 3.598        | 3.598        |
| F000                   | 432.0        | 432.0        |
| F000'                  | 434.83       |              |
| h, k, lmax             | 6, 12, 17    | 6, 12, 17    |
| Nref                   | 1425 [ 862]  | 1418         |
| Tmin, Tmax             | 0.682, 0.750 | 0.572, 0.753 |
| Tmin'                  | 0.243        |              |

Correction method= # Reported T Limits: Tmin=0.572 Tmax=0.753  
AbsCorr = MULTI-SCAN

Data completeness= 1.65/1.00      Theta(max)= 66.836

R(reflections)= 0.0315( 1398)      wR2(reflections)= 0.0833( 1418)

S = 1.085      Npar= 121

The following ALERTS were generated. Each ALERT has the format  
**test-name\_ALERT\_alert-type\_alert-level.**  
Click on the hyperlinks for more details of the test.

● **Alert level C**

|                   |                                               |        |              |
|-------------------|-----------------------------------------------|--------|--------------|
| PLAT089 ALERT 3 C | Poor Data / Parameter Ratio (Zmax < 18) ..... | 7.09   | Note         |
| PLAT340 ALERT 3 C | Low Bond Precision on C-C Bonds .....         | 0.0042 | Ang.         |
| PLAT420 ALERT 2 C | D-H Without Acceptor N1 --H1N                 |        | Please Check |
| PLAT480 ALERT 4 C | Long H...A H-Bond Reported H1N ..05           | 2.62   | Ang.         |
| PLAT480 ALERT 4 C | Long H...A H-Bond Reported H1N ..N1           | 2.64   | Ang.         |
| PLAT911 ALERT 3 C | Missing FCF Refl Between Thmin & STh/L= 0.596 |        | 4 Report     |

● **Alert level G**

|                   |                                                  |       |          |
|-------------------|--------------------------------------------------|-------|----------|
| PLAT002 ALERT 2 G | Number of Distance or Angle Restraints on AtSite | 2     | Note     |
| PLAT172 ALERT 4 G | The CIF-Embedded .res File Contains DFIX Records | 1     | Report   |
| PLAT395 ALERT 2 G | Deviating X-O-Y Angle From 120 for O3            | 109.2 | Degree   |
| PLAT398 ALERT 2 G | Deviating C-O-C Angle From 120 for O4            | 106.1 | Degree   |
| PLAT398 ALERT 2 G | Deviating C-O-C Angle From 120 for O5            | 106.3 | Degree   |
| PLAT791 ALERT 4 G | Model has Chirality at C1 (Chiral SPGR)          |       | R Verify |
| PLAT791 ALERT 4 G | Model has Chirality at C4 (Chiral SPGR)          |       | R Verify |
| PLAT860 ALERT 3 G | Number of Least-Squares Restraints .....         | 1     | Note     |
| PLAT909 ALERT 3 G | Percentage of I>2sig(I) Data at Theta(Max) Still | 98%   | Note     |
| PLAT978 ALERT 2 G | Number C-C Bonds with Positive Residual Density. | 3     | Info     |

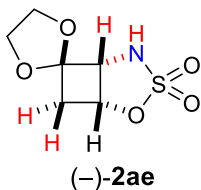

- 0 **ALERT level A** = Most likely a serious problem - resolve or explain  
0 **ALERT level B** = A potentially serious problem, consider carefully  
6 **ALERT level C** = Check. Ensure it is not caused by an omission or oversight  
10 **ALERT level G** = General information/check it is not something unexpected

- 0 ALERT type 1 CIF construction/syntax error, inconsistent or missing data  
6 ALERT type 2 Indicator that the structure model may be wrong or deficient  
5 ALERT type 3 Indicator that the structure quality may be low  
5 ALERT type 4 Improvement, methodology, query or suggestion  
0 ALERT type 5 Informative message, check

It is advisable to attempt to resolve as many as possible of the alerts in all categories. Often the minor alerts point to easily fixed oversights, errors and omissions in your CIF or refinement strategy, so attention to these fine details can be worthwhile. In order to resolve some of the more serious problems it may be necessary to carry out additional measurements or structure refinements. However, the purpose of your study may justify the reported deviations and the more serious of these should normally be commented upon in the discussion or experimental section of a paper or in the "special\_details" fields of the CIF. checkCIF was carefully designed to identify outliers and unusual parameters, but every test has its limitations and alerts that are not important in a particular case may appear. Conversely, the absence of alerts does not guarantee there are no aspects of the results needing attention. It is up to the individual to critically assess their own results and, if necessary, seek expert advice.

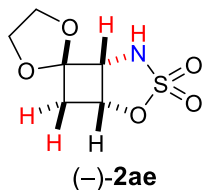

#### Publication of your CIF in IUCr journals

A basic structural check has been run on your CIF. These basic checks will be run on all CIFs submitted for publication in IUCr journals (*Acta Crystallographica*, *Journal of Applied Crystallography*, *Journal of Synchrotron Radiation*); however, if you intend to submit to *Acta Crystallographica Section C or E* or *IUCrData*, you should make sure that full publication checks are run on the final version of your CIF prior to submission.

#### Publication of your CIF in other journals

Please refer to the *Notes for Authors* of the relevant journal for any special instructions relating to CIF submission.

---

PLATON version of 23/04/2018; check.def file version of 23/04/2018

Datablock C6H9NO5S - ellipsoid plot

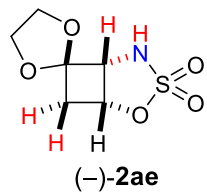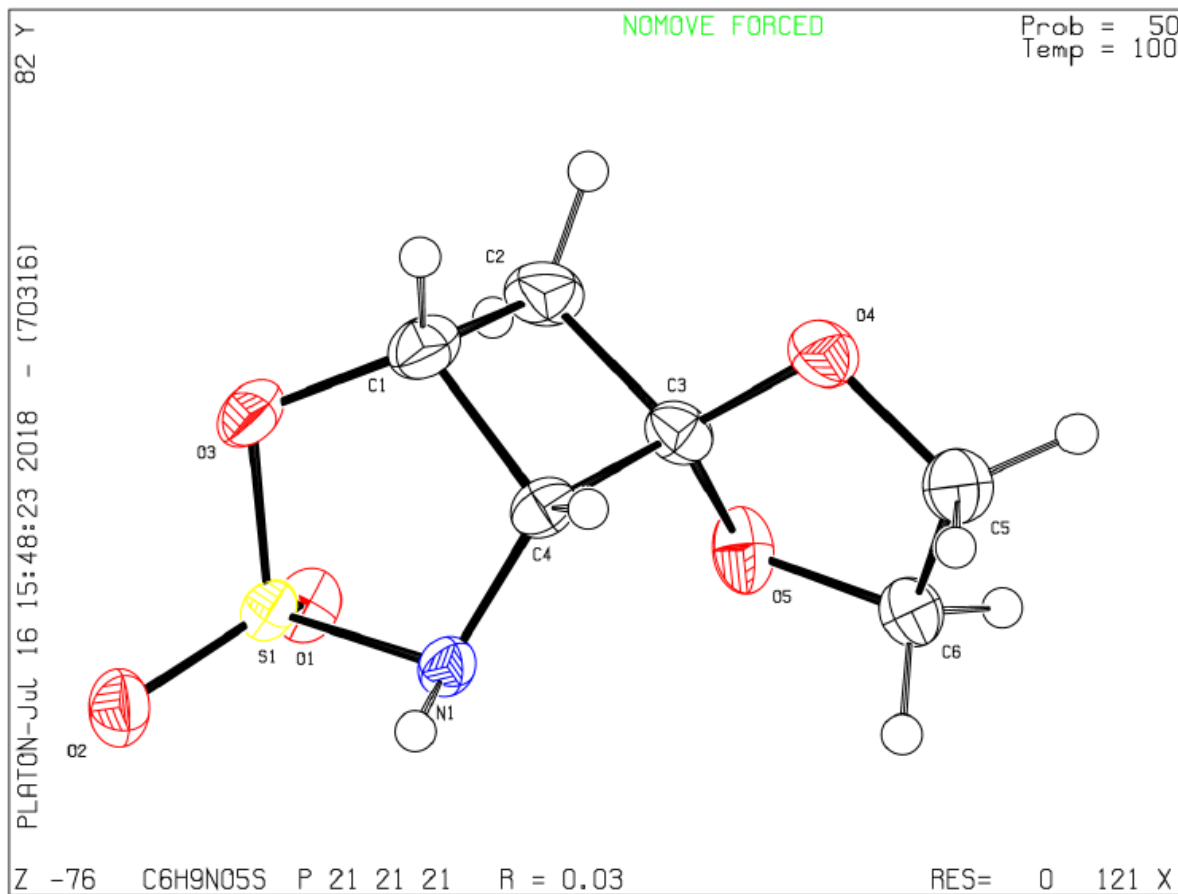



$\text{CHCl}_3$

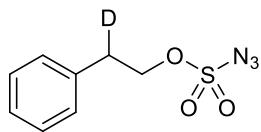

$^1\text{H}$  NMR of **1a<sub>D</sub>**, 600 MHz,  $\text{CDCl}_3$

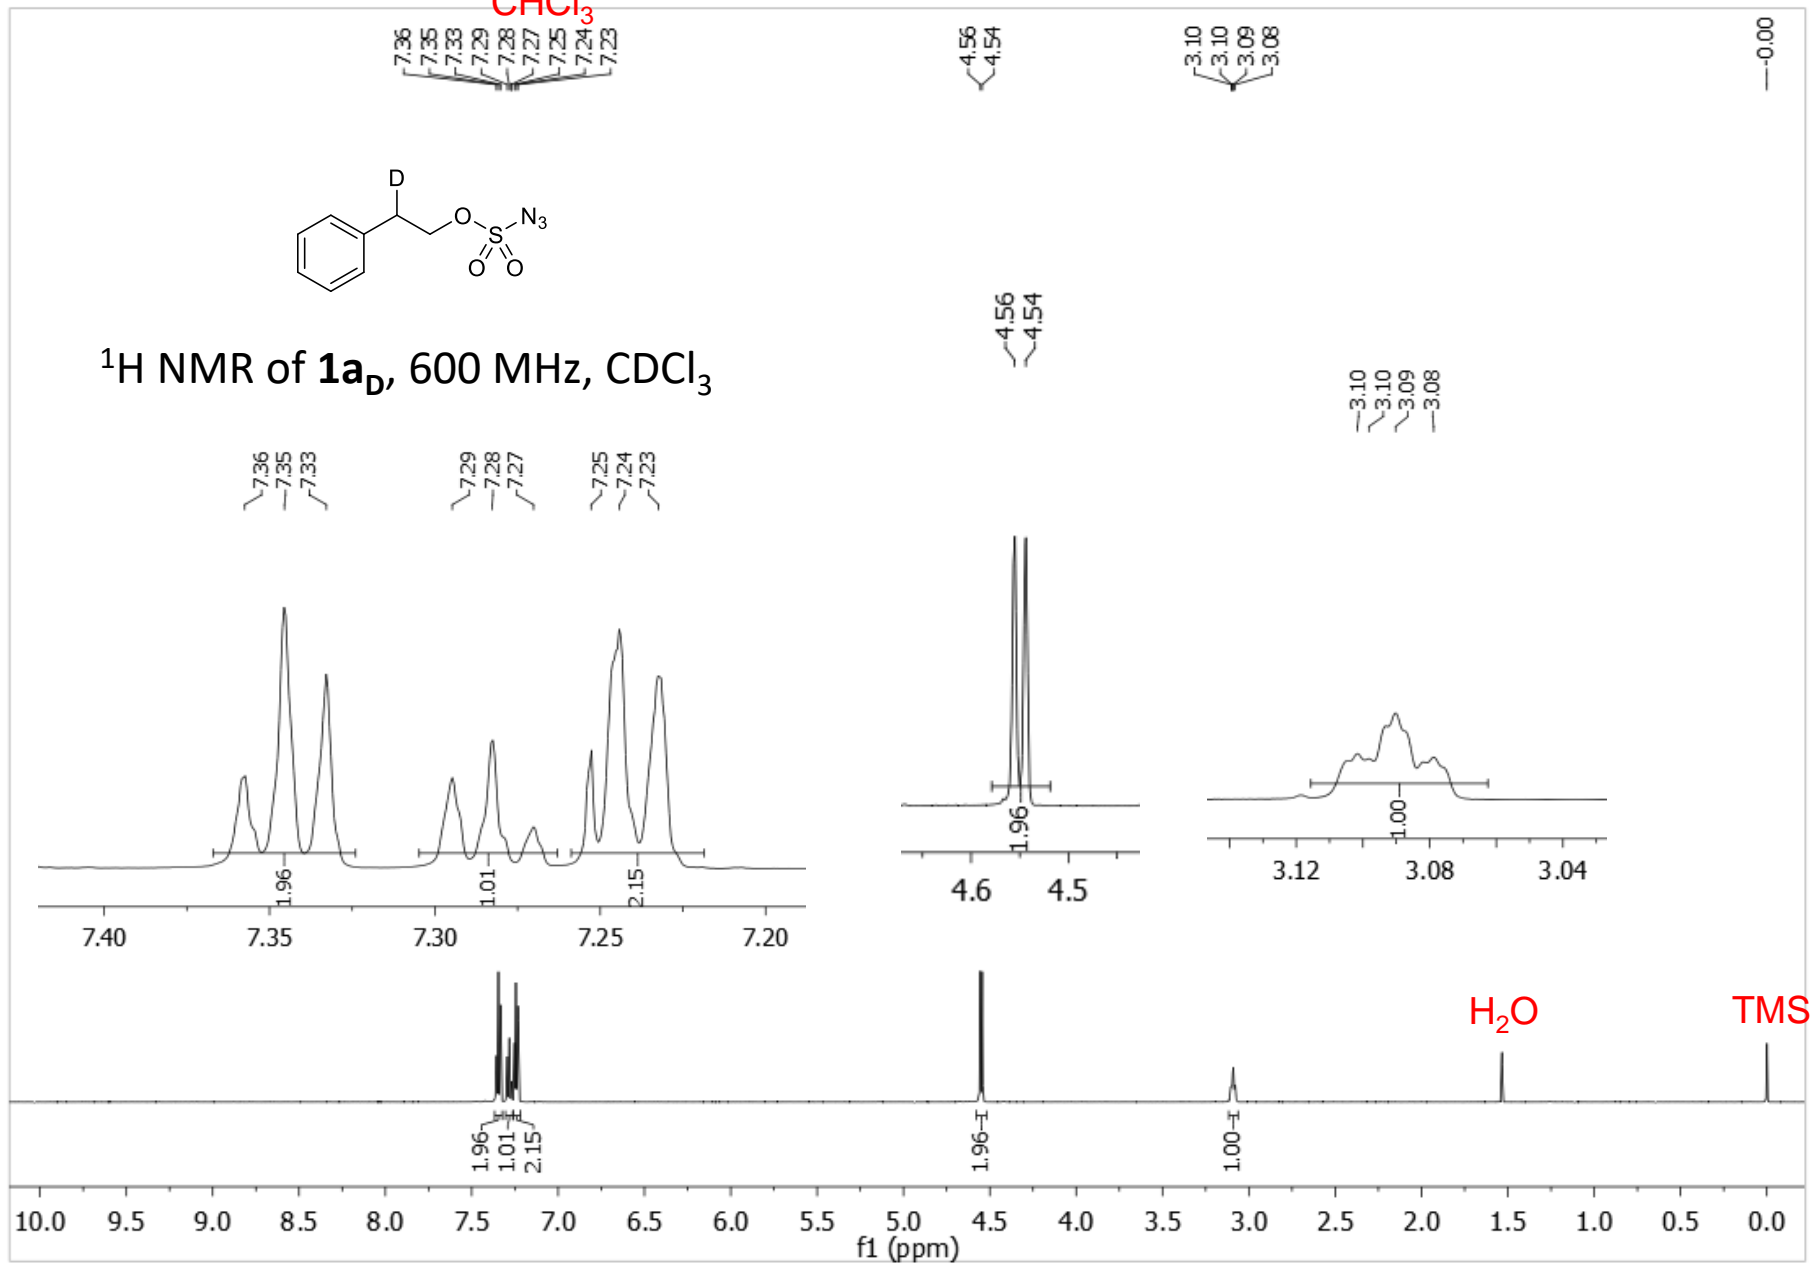

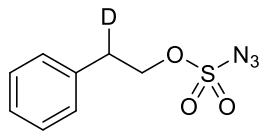

$^{13}\text{C}$  NMR of **1a<sub>D</sub>**, 150 MHz,  $\text{CDCl}_3$

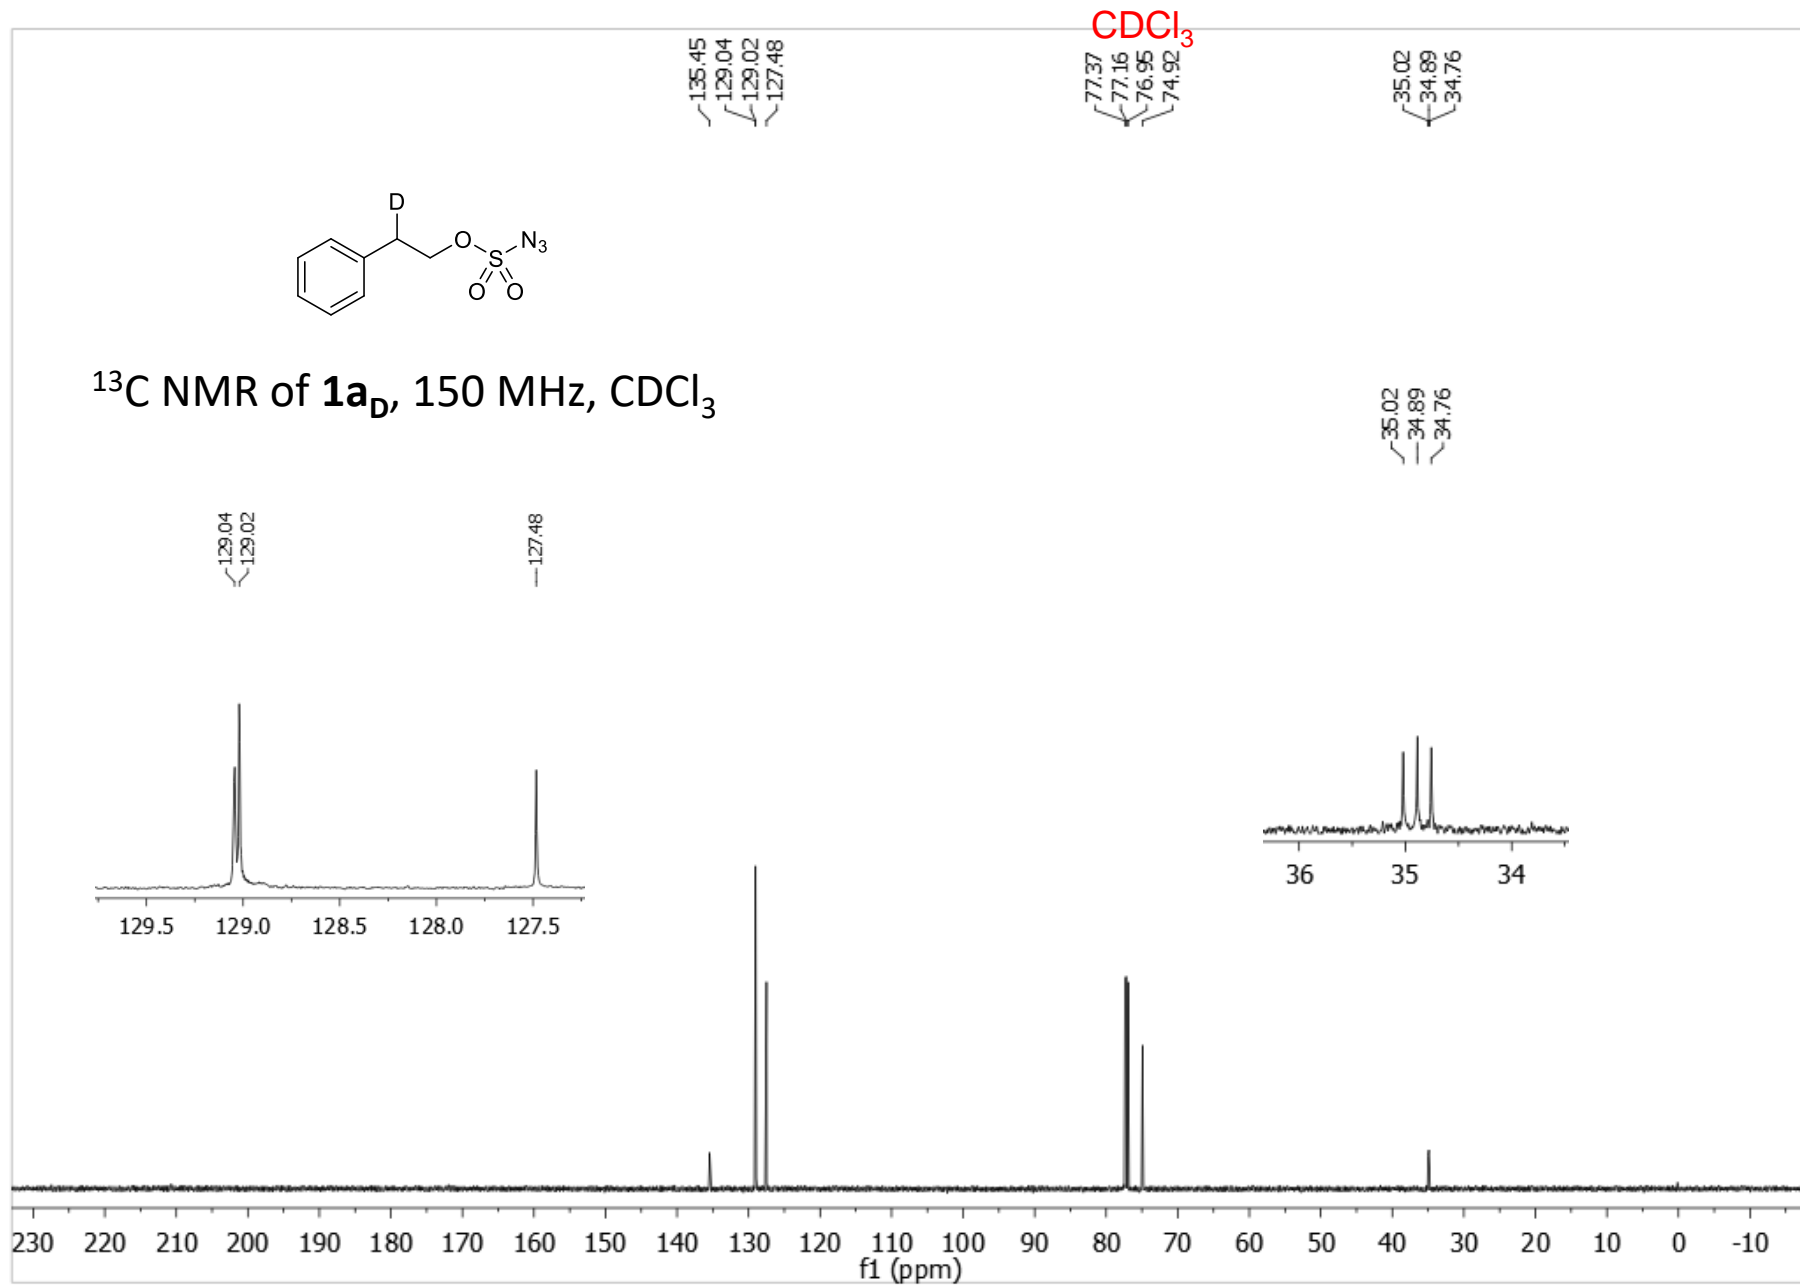

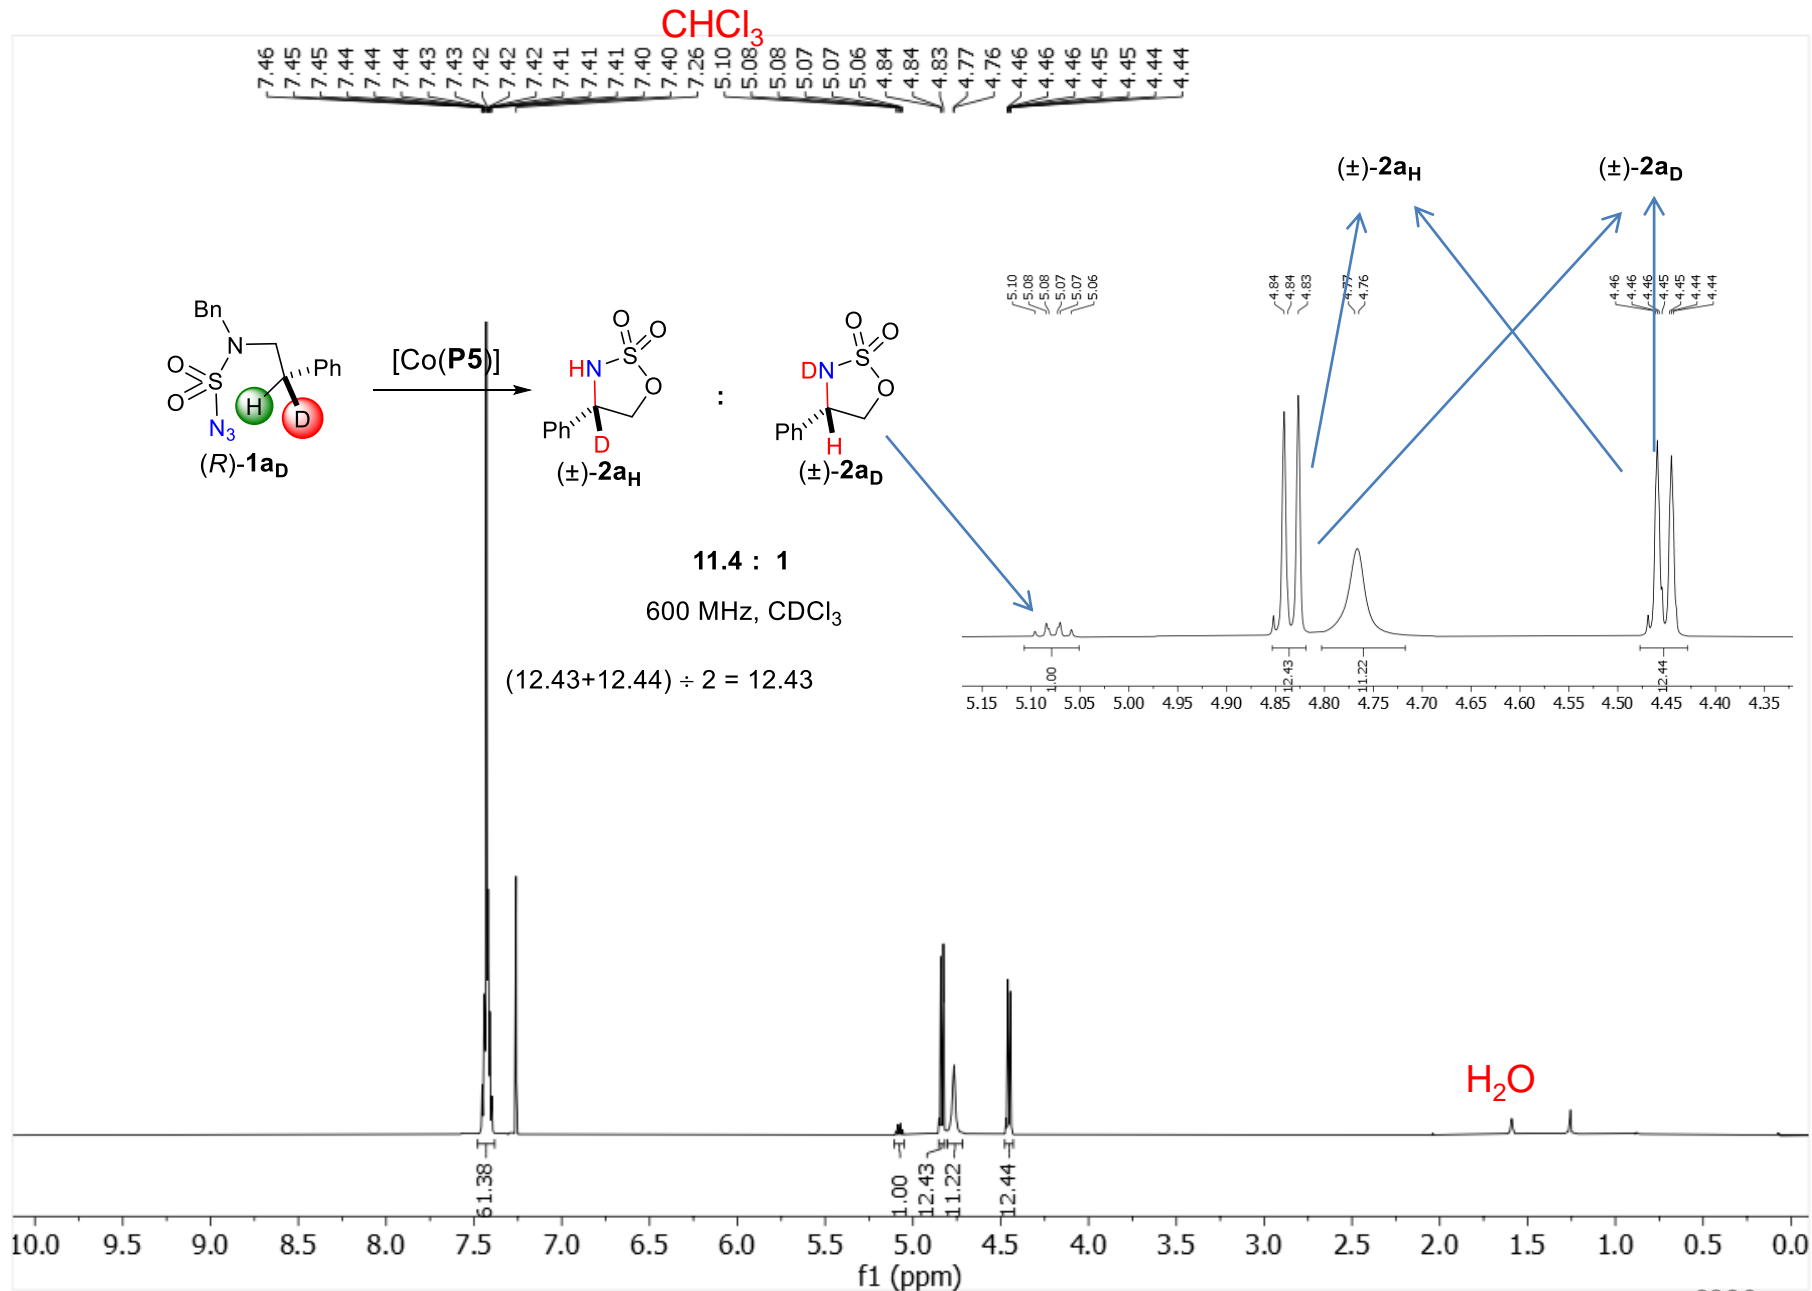

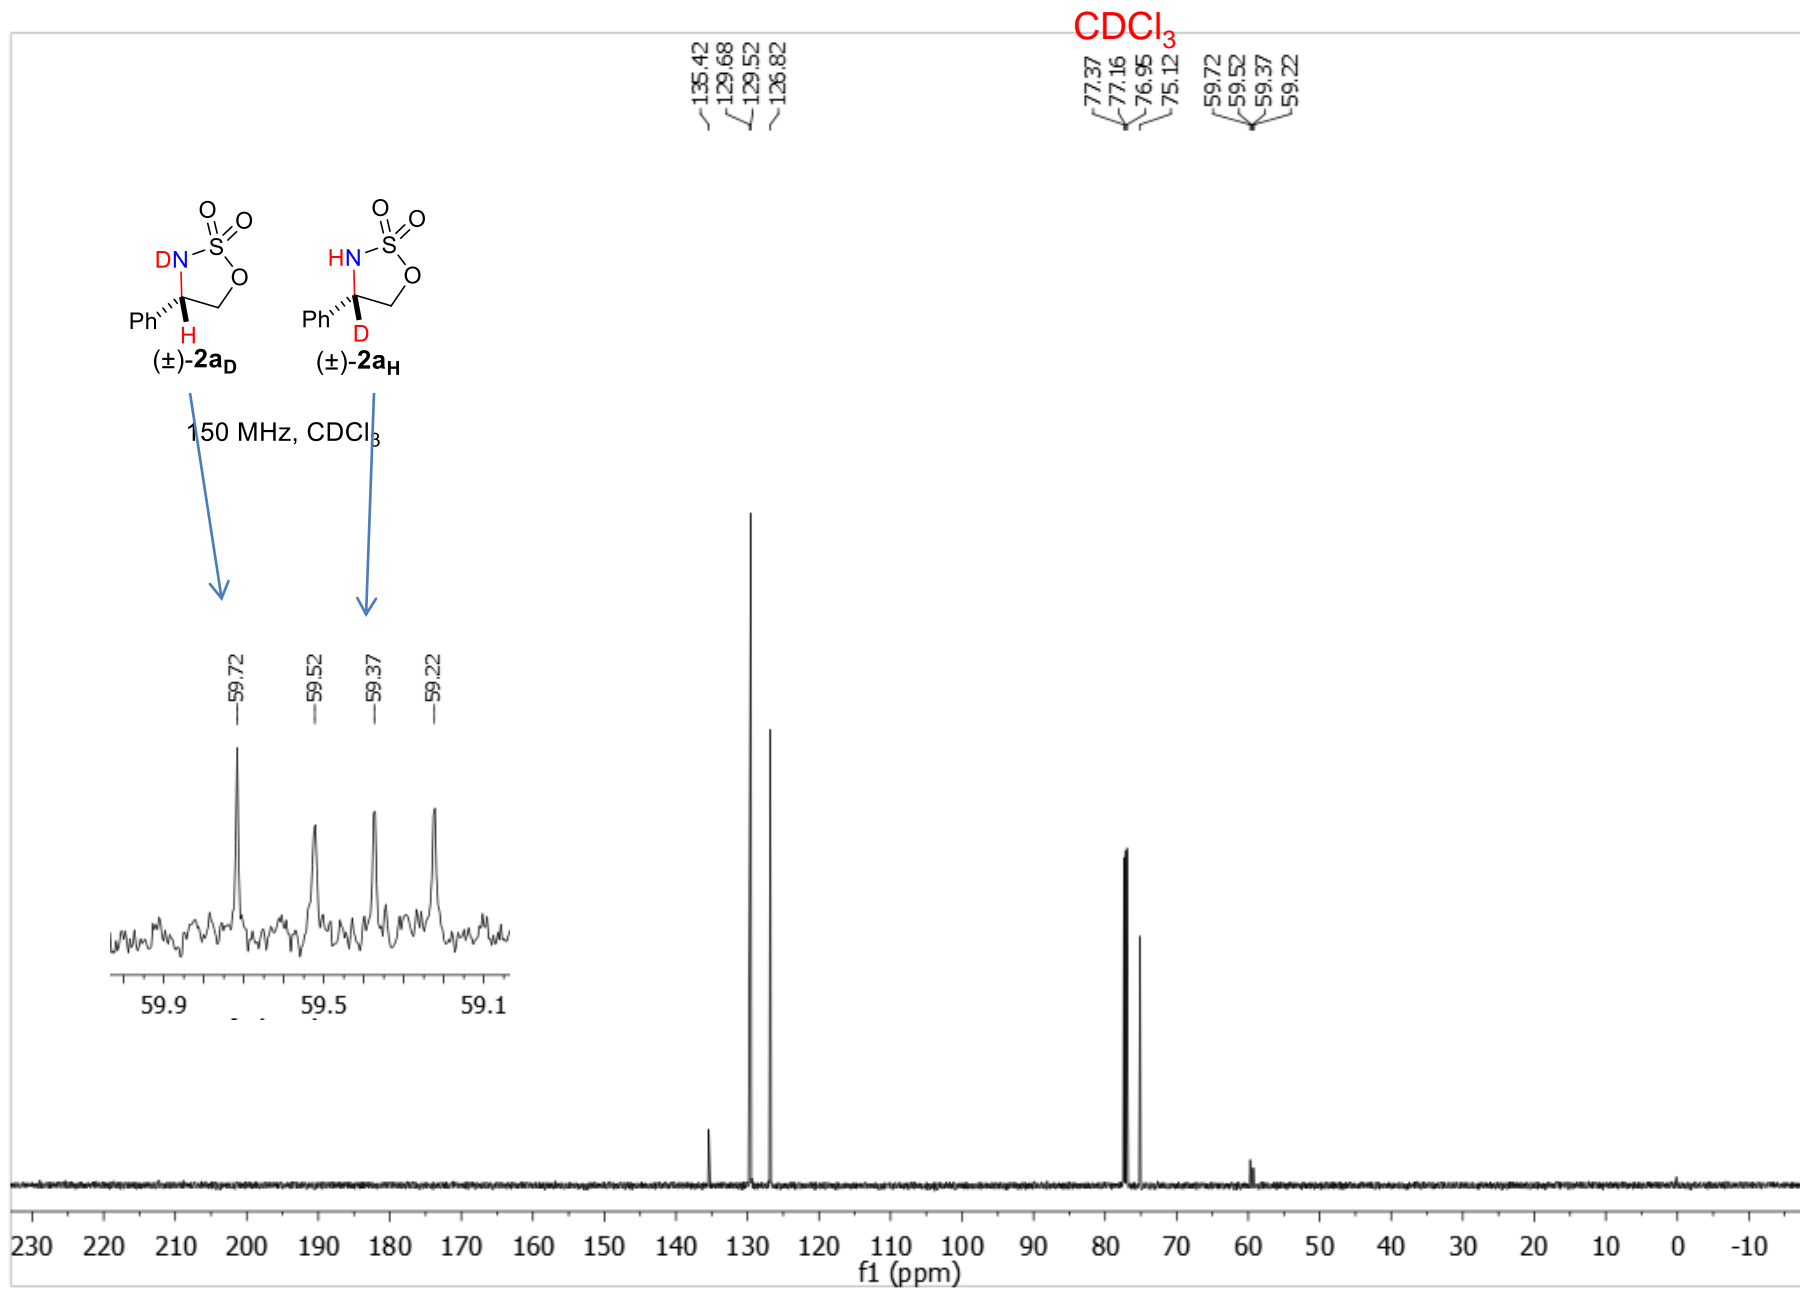

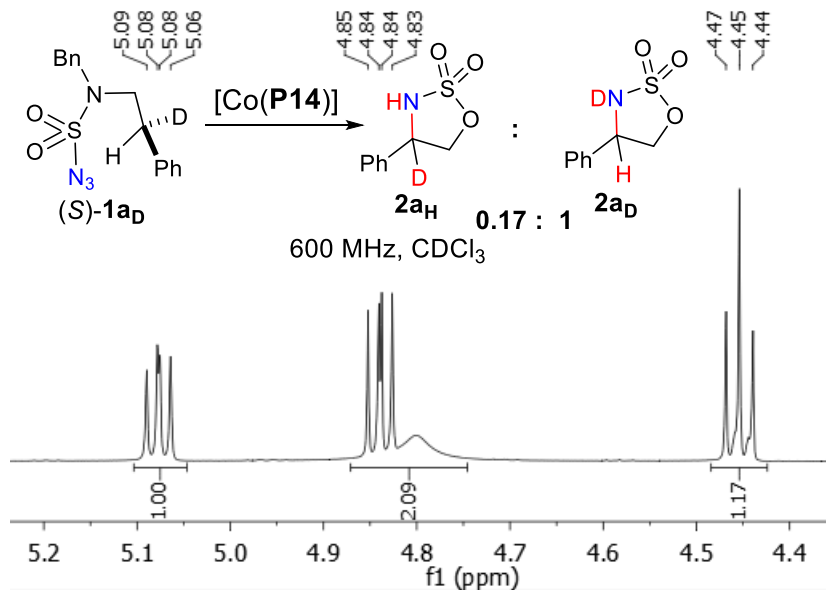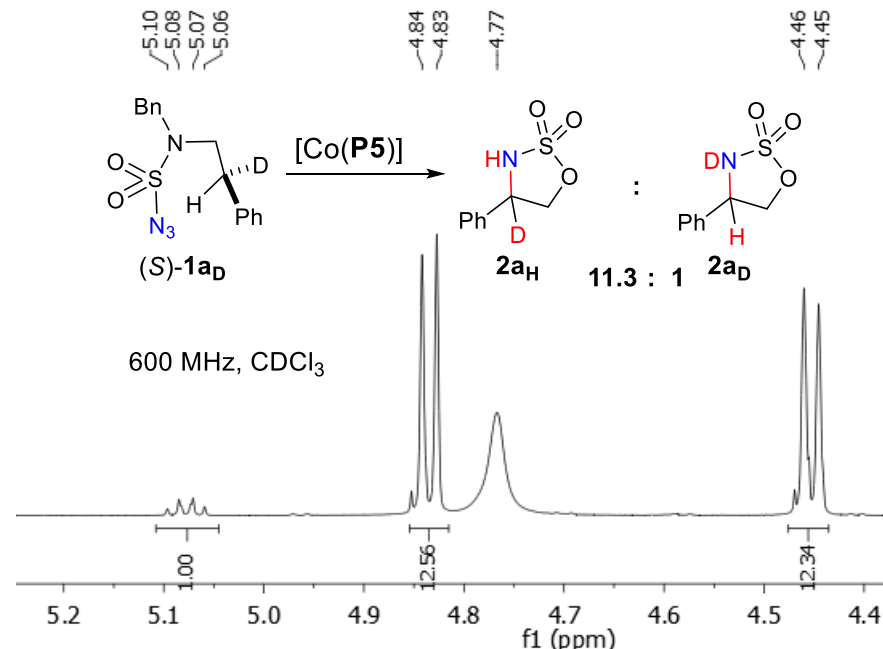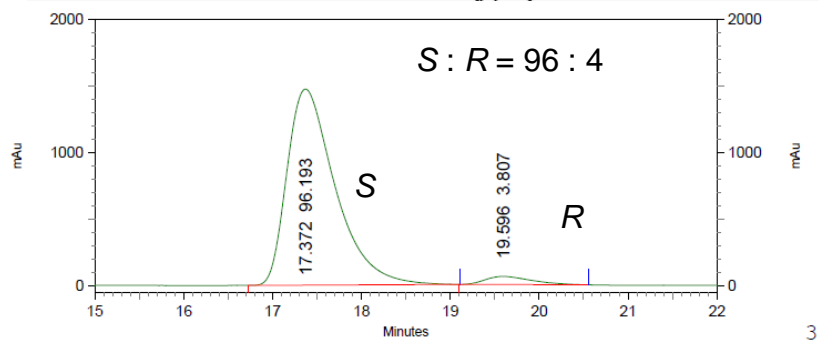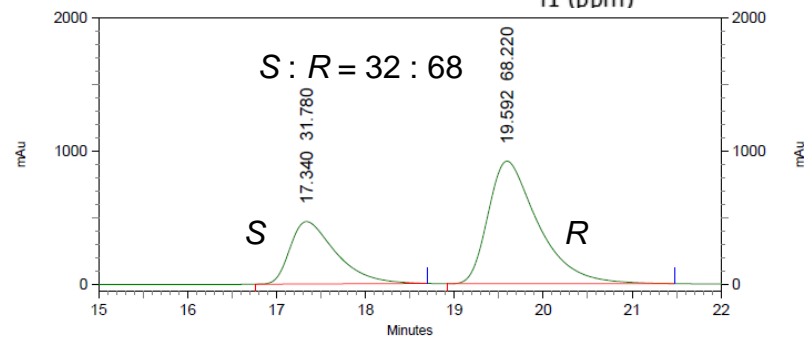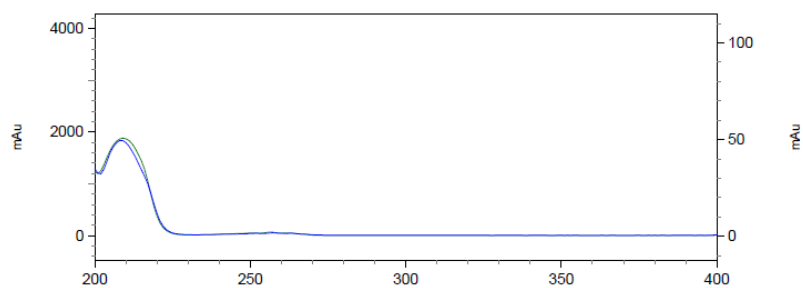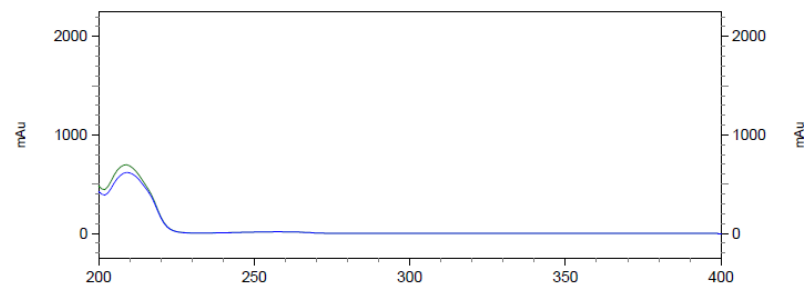

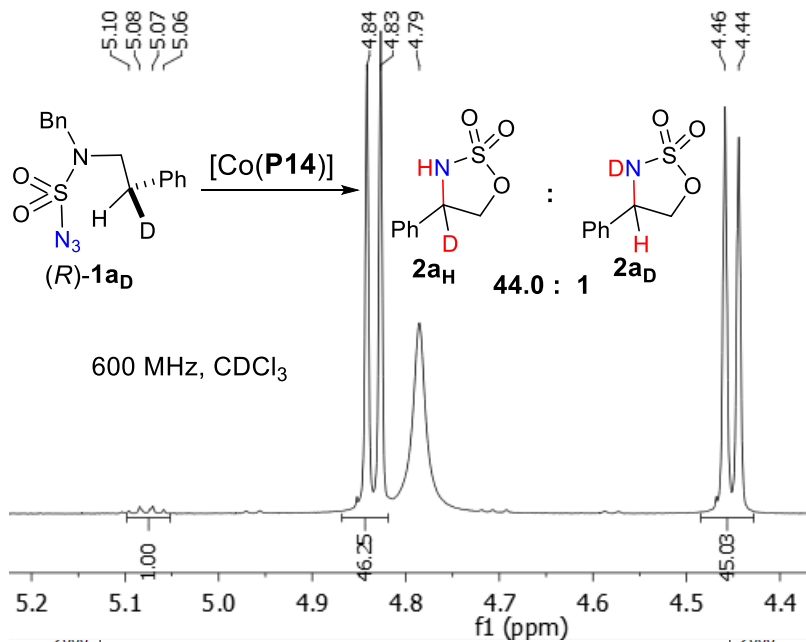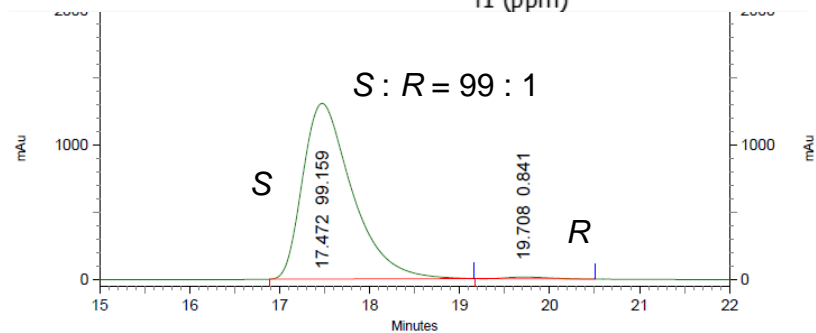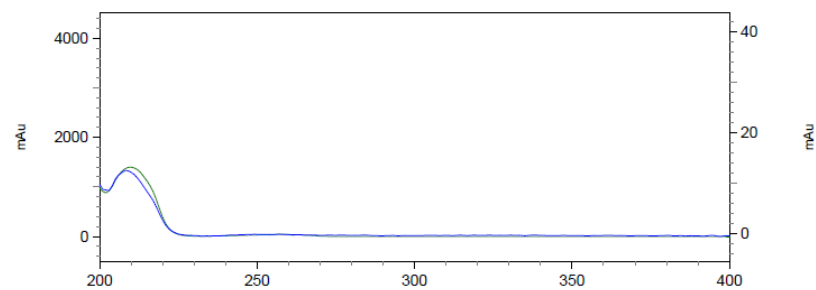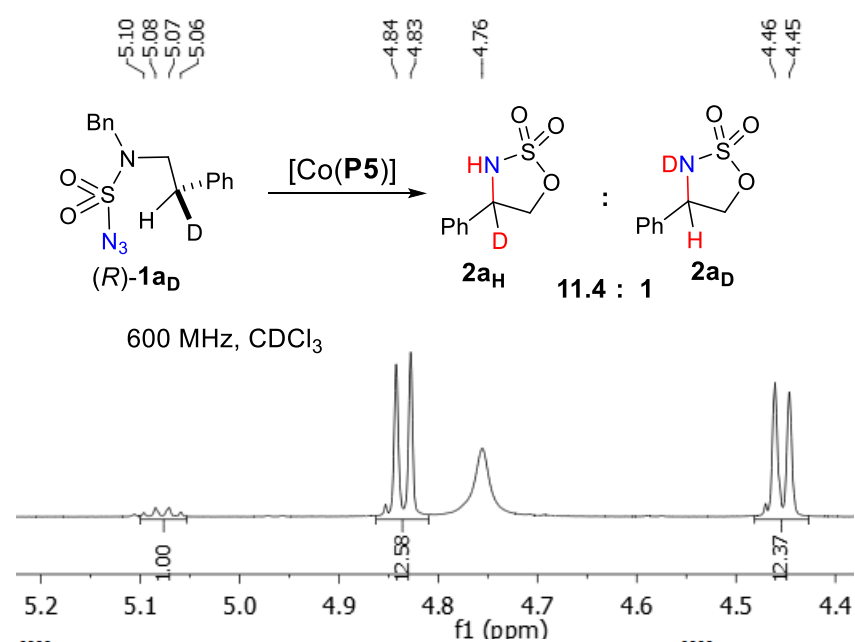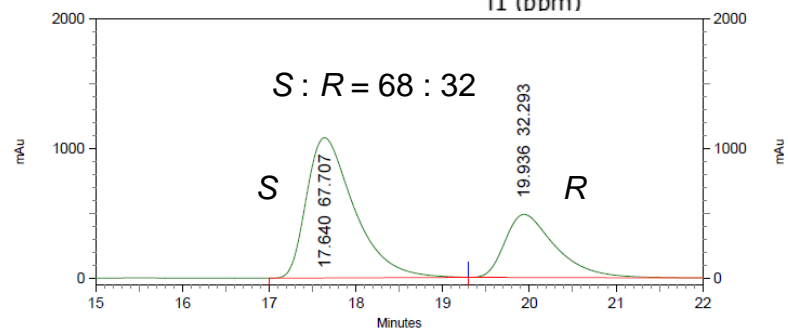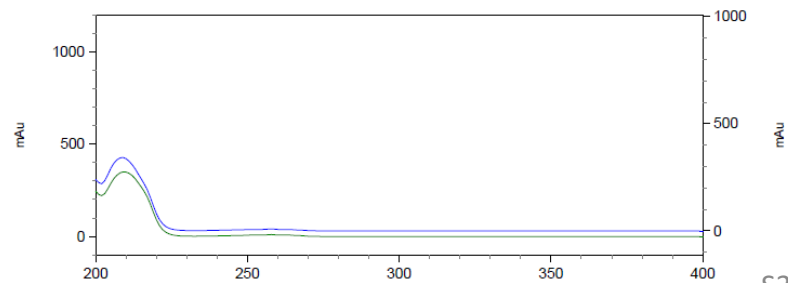

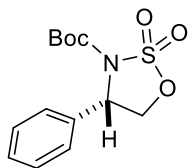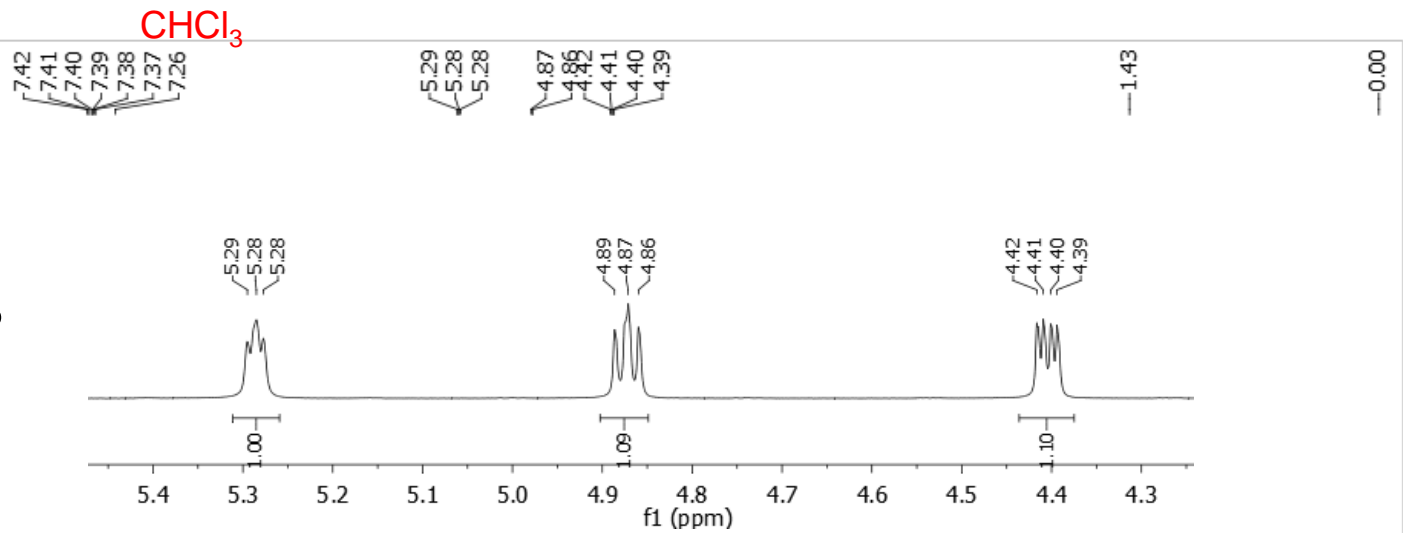

$^1\text{H}$  NMR of *N*-Boc-**2a**, 600 MHz,  $\text{CDCl}_3$

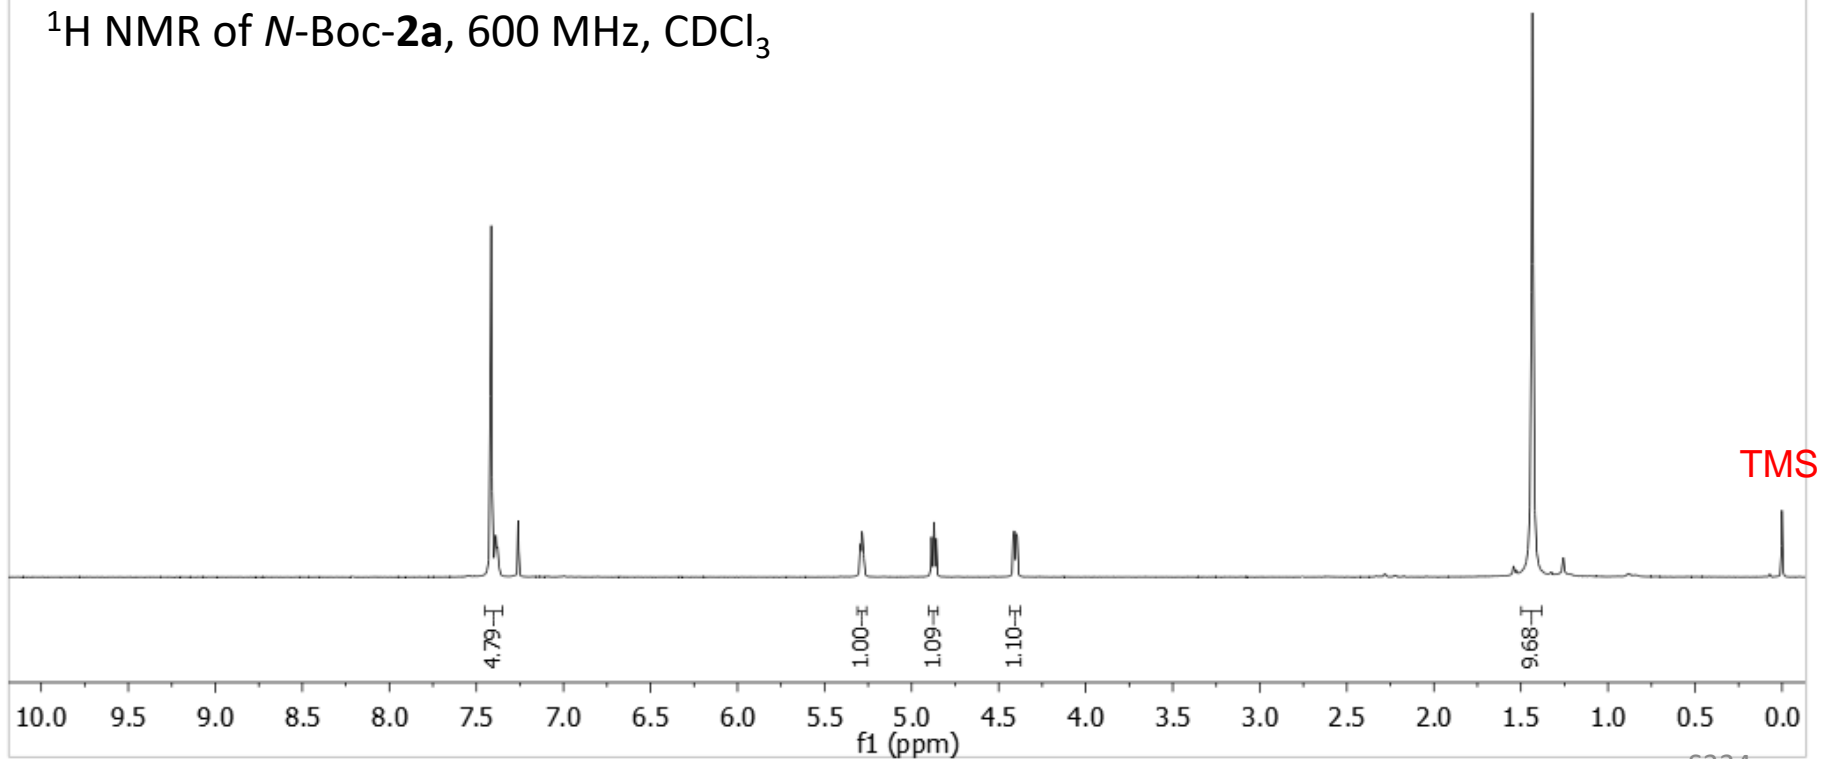

k0l-369-C13  
new experiment

CDCl<sub>3</sub>

— 148.40 — 137.09 — 129.39 — 129.28 — 126.30 — 85.72 — 77.37 — 77.16 — 76.95 — 71.92 — 60.90 — 27.97

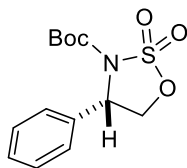

<sup>13</sup>C NMR of *N*-Boc-2a, 150 MHz, CDCl<sub>3</sub>

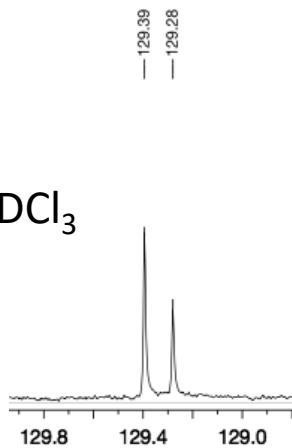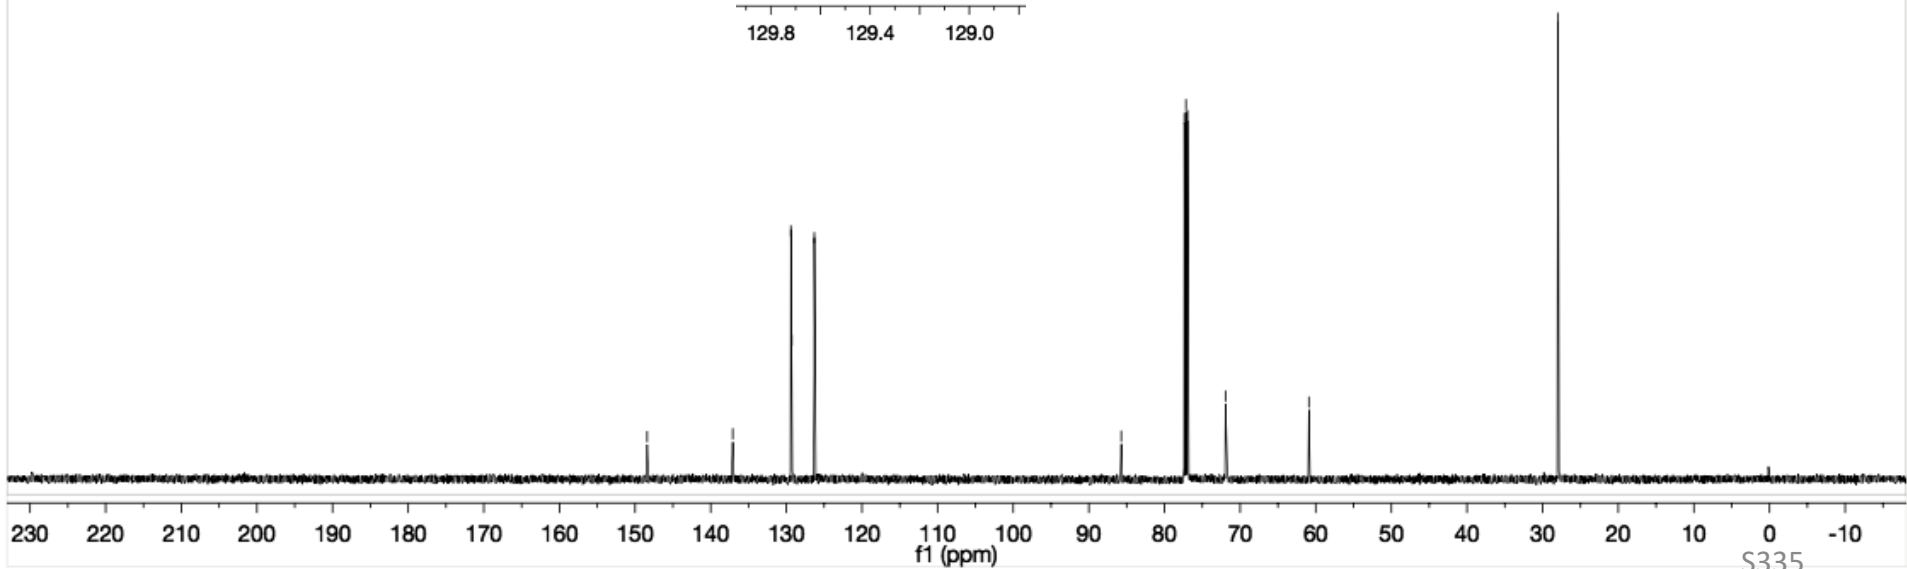



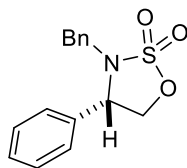

$^1\text{H}$  NMR of *N*-Bn-**2a**, 600 MHz,  $\text{CDCl}_3$

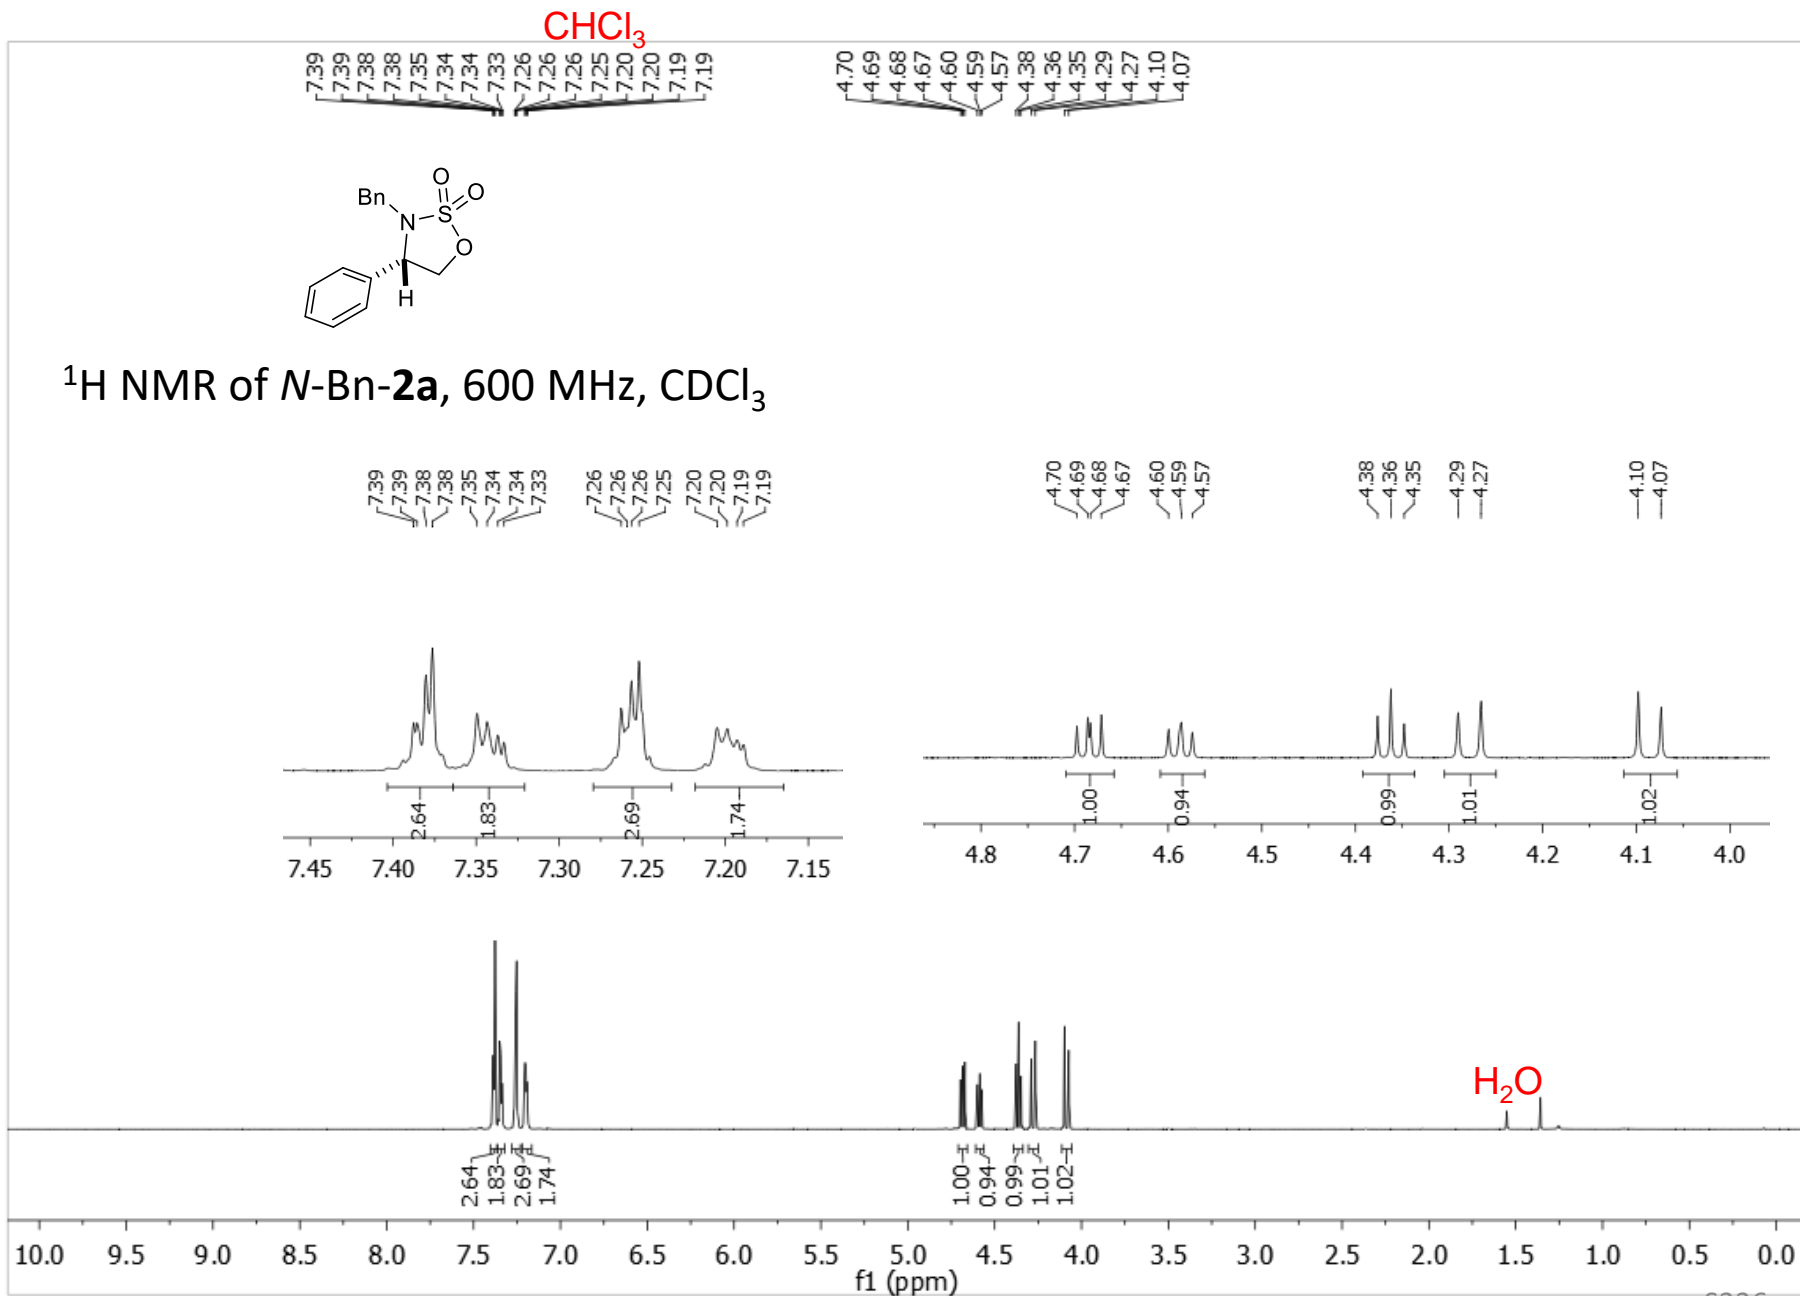

CDCl<sub>3</sub>

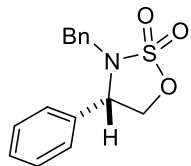

<sup>13</sup>C NMR of *N*-Bn-**2a**, 150 MHz, CDCl<sub>3</sub>

134.84  
133.84  
129.72  
129.40  
129.38  
128.60  
128.38  
127.87

77.37  
77.16  
76.95  
72.65  
63.24  
49.41

129.72  
129.40  
129.38  
128.60  
128.38  
127.87

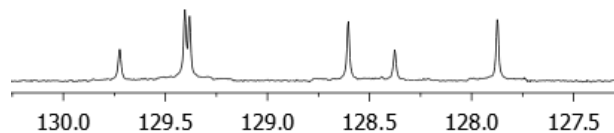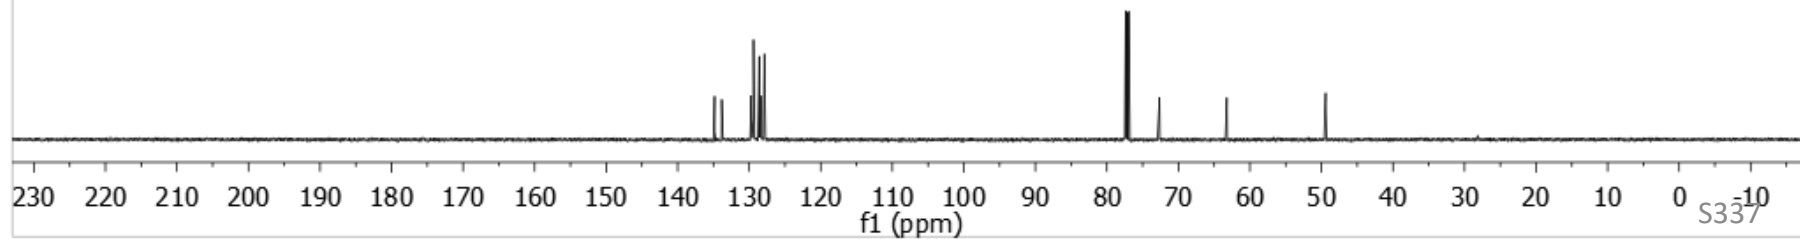

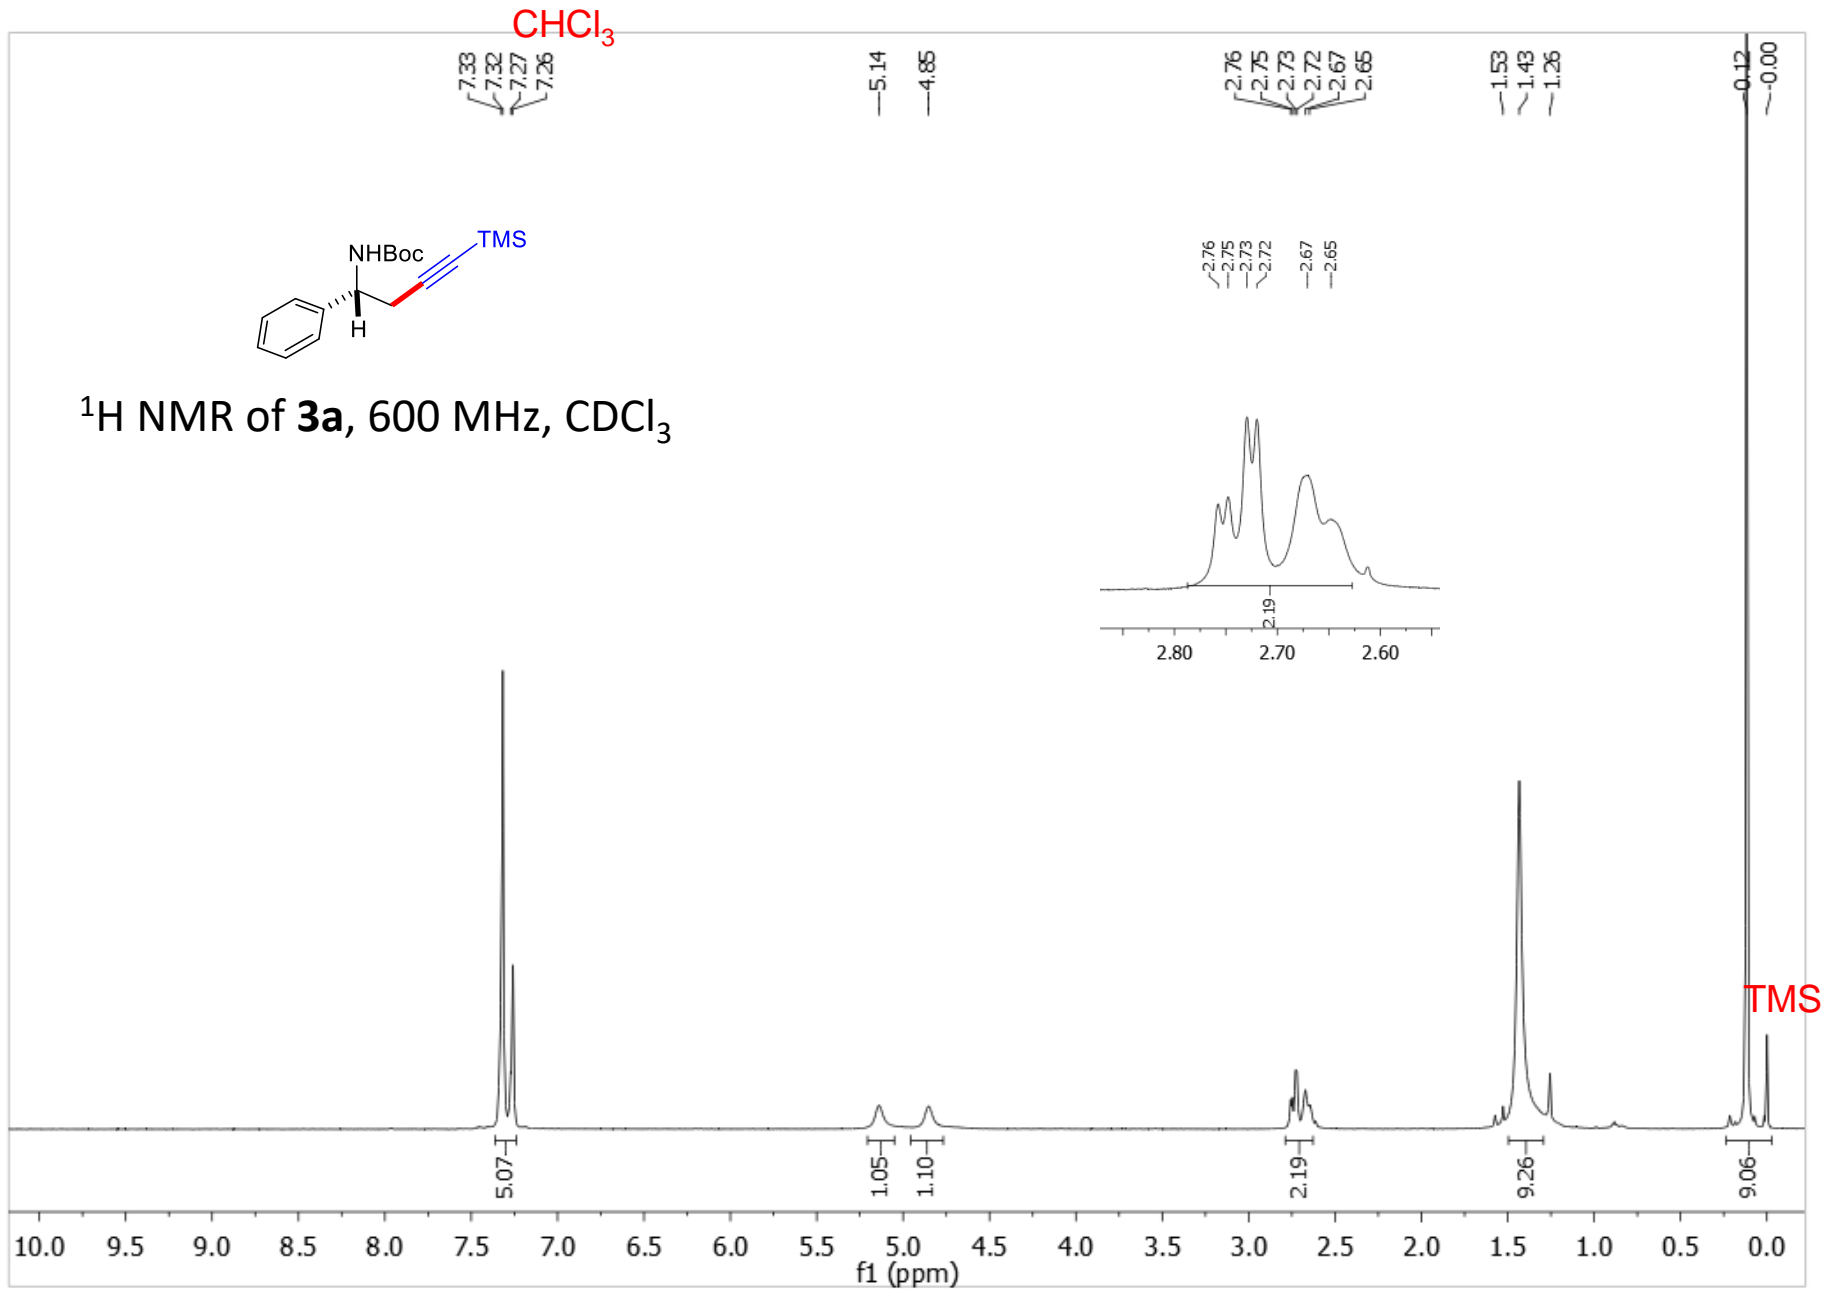

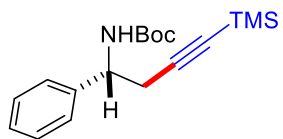

$^{13}\text{C}$  NMR of **3a**, 150 MHz,  $\text{CDCl}_3$

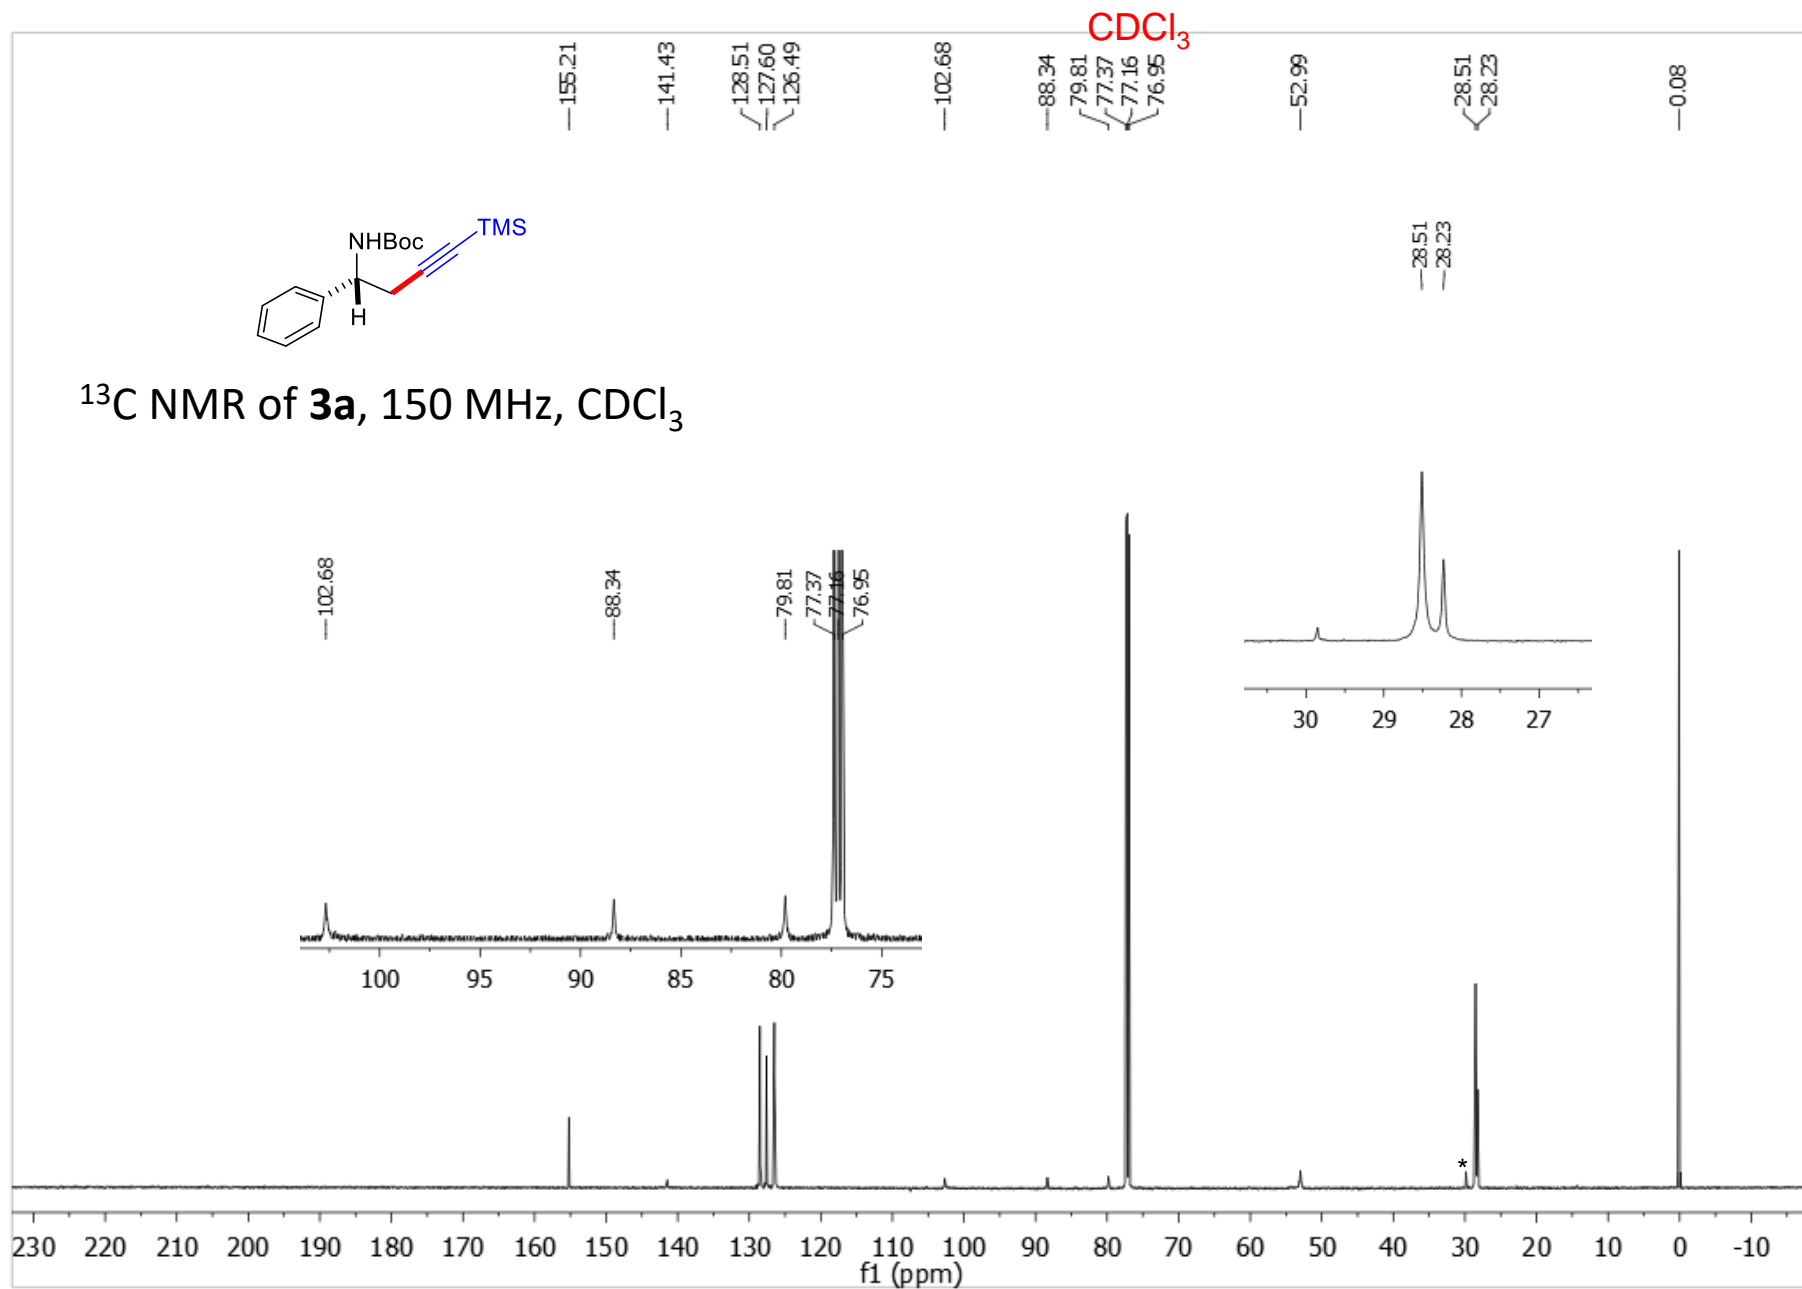

K0L-397-IC-1.5%-1mL-4  
C:\EZStart\Projects\Default\Data\K0L-397-IC-5%-1mL-4  
C:\EZStart\Projects\Default\Method\SMG-OJ-H-20%1ml-report.met

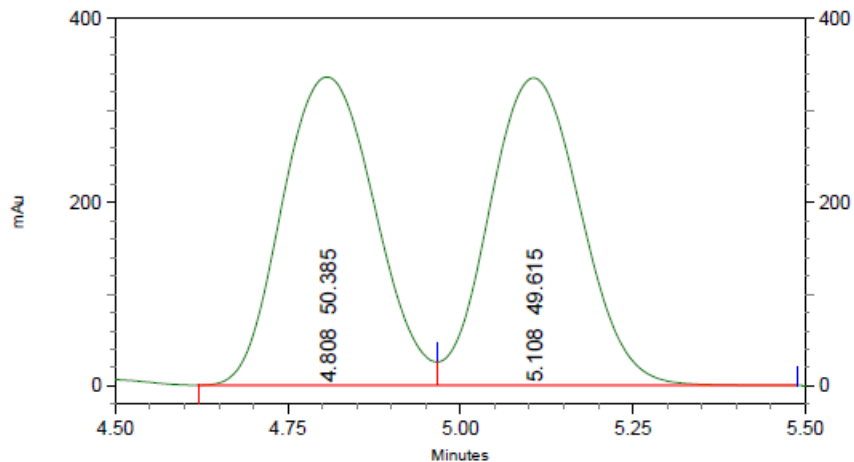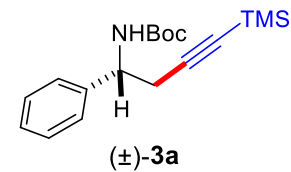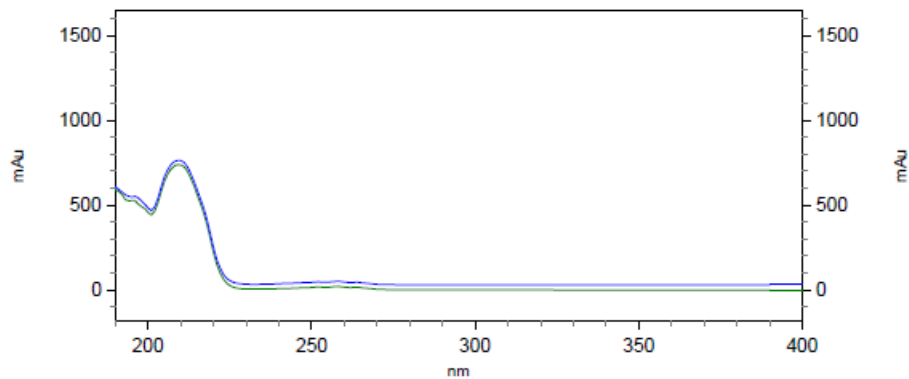

2: 215 nm, 4  
nm Results

| Pk #   | Retention Time | Area Percent |
|--------|----------------|--------------|
| 1      | 4.808          | 50.385       |
| 2      | 5.108          | 49.615       |
| Totals |                | 100.000      |

K0L-396-IC-5%-1mL-4

C:\EZStart\Projects\Default\Data\K0L-396-IC-5%-1mL-4

C:\EZStart\Projects\Default\Method\SMG-OJ-H-20%1ml-report.met

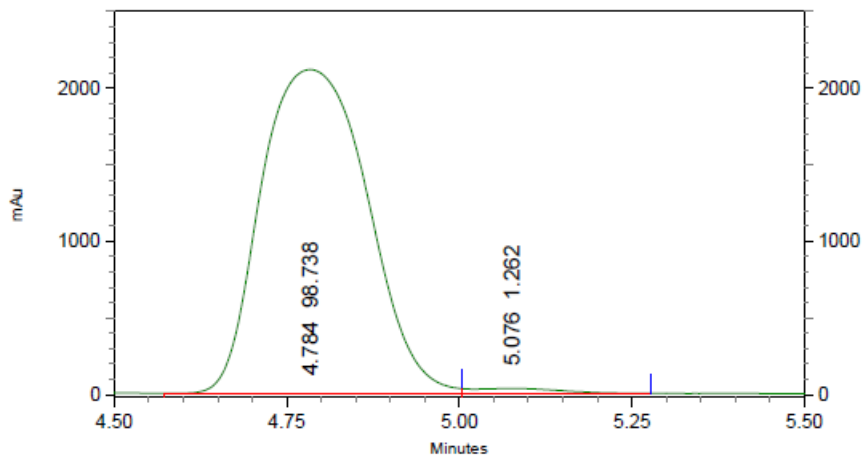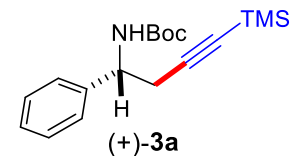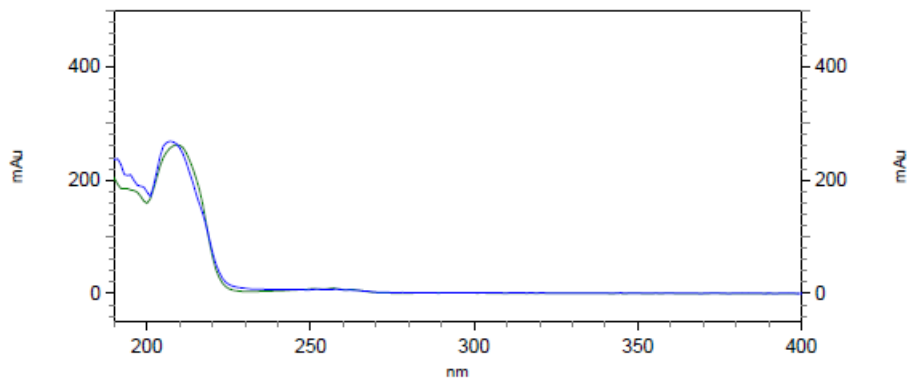

2: 220 nm, 4

nm Results

| Pk # | Retention Time | Area Percent |
|------|----------------|--------------|
| 1    | 4.784          | 98.738       |
| 2    | 5.076          | 1.262        |

|        |  |         |
|--------|--|---------|
| Totals |  | 100.000 |
|--------|--|---------|

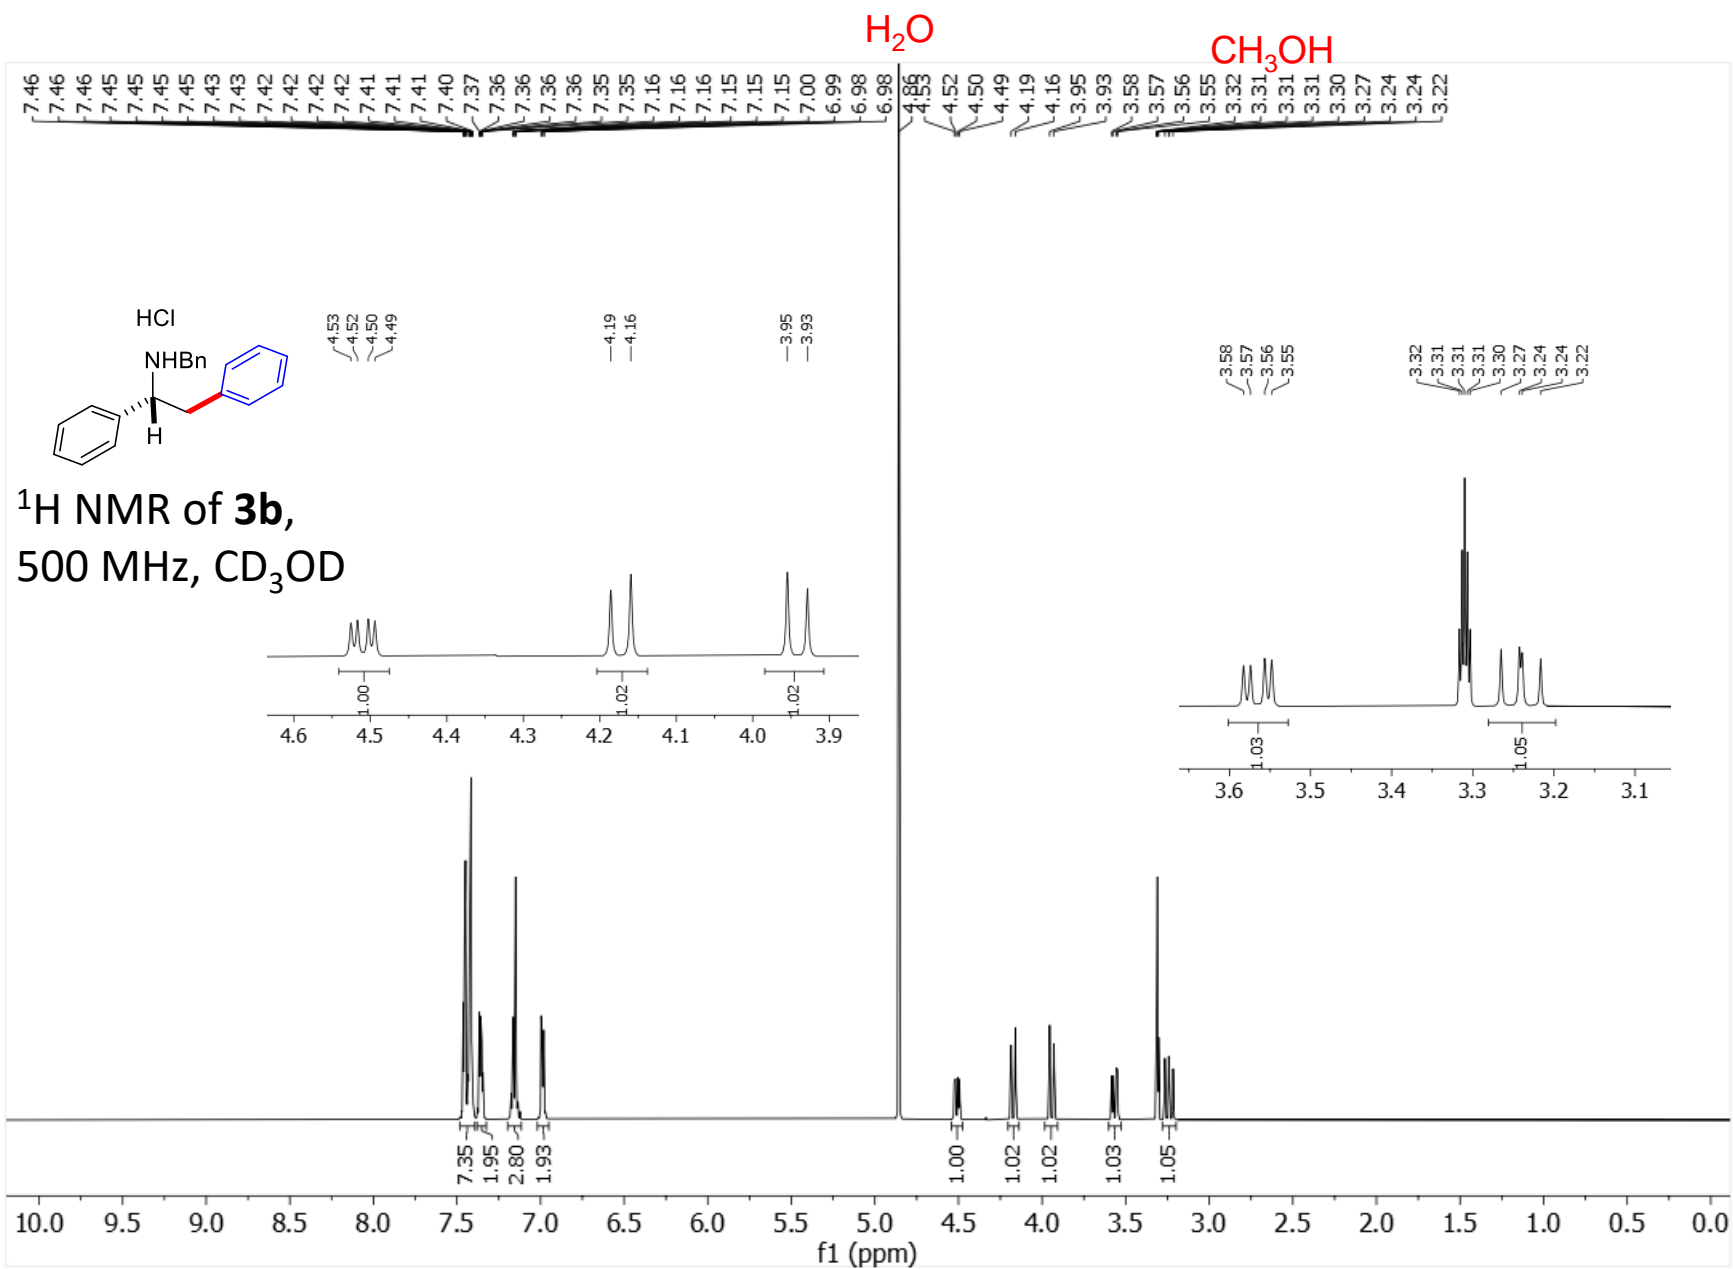

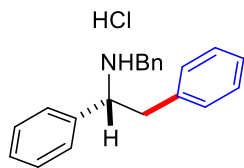

$^{13}\text{C}$  NMR of **3b**,  
125 MHz,  $\text{CD}_3\text{OD}$

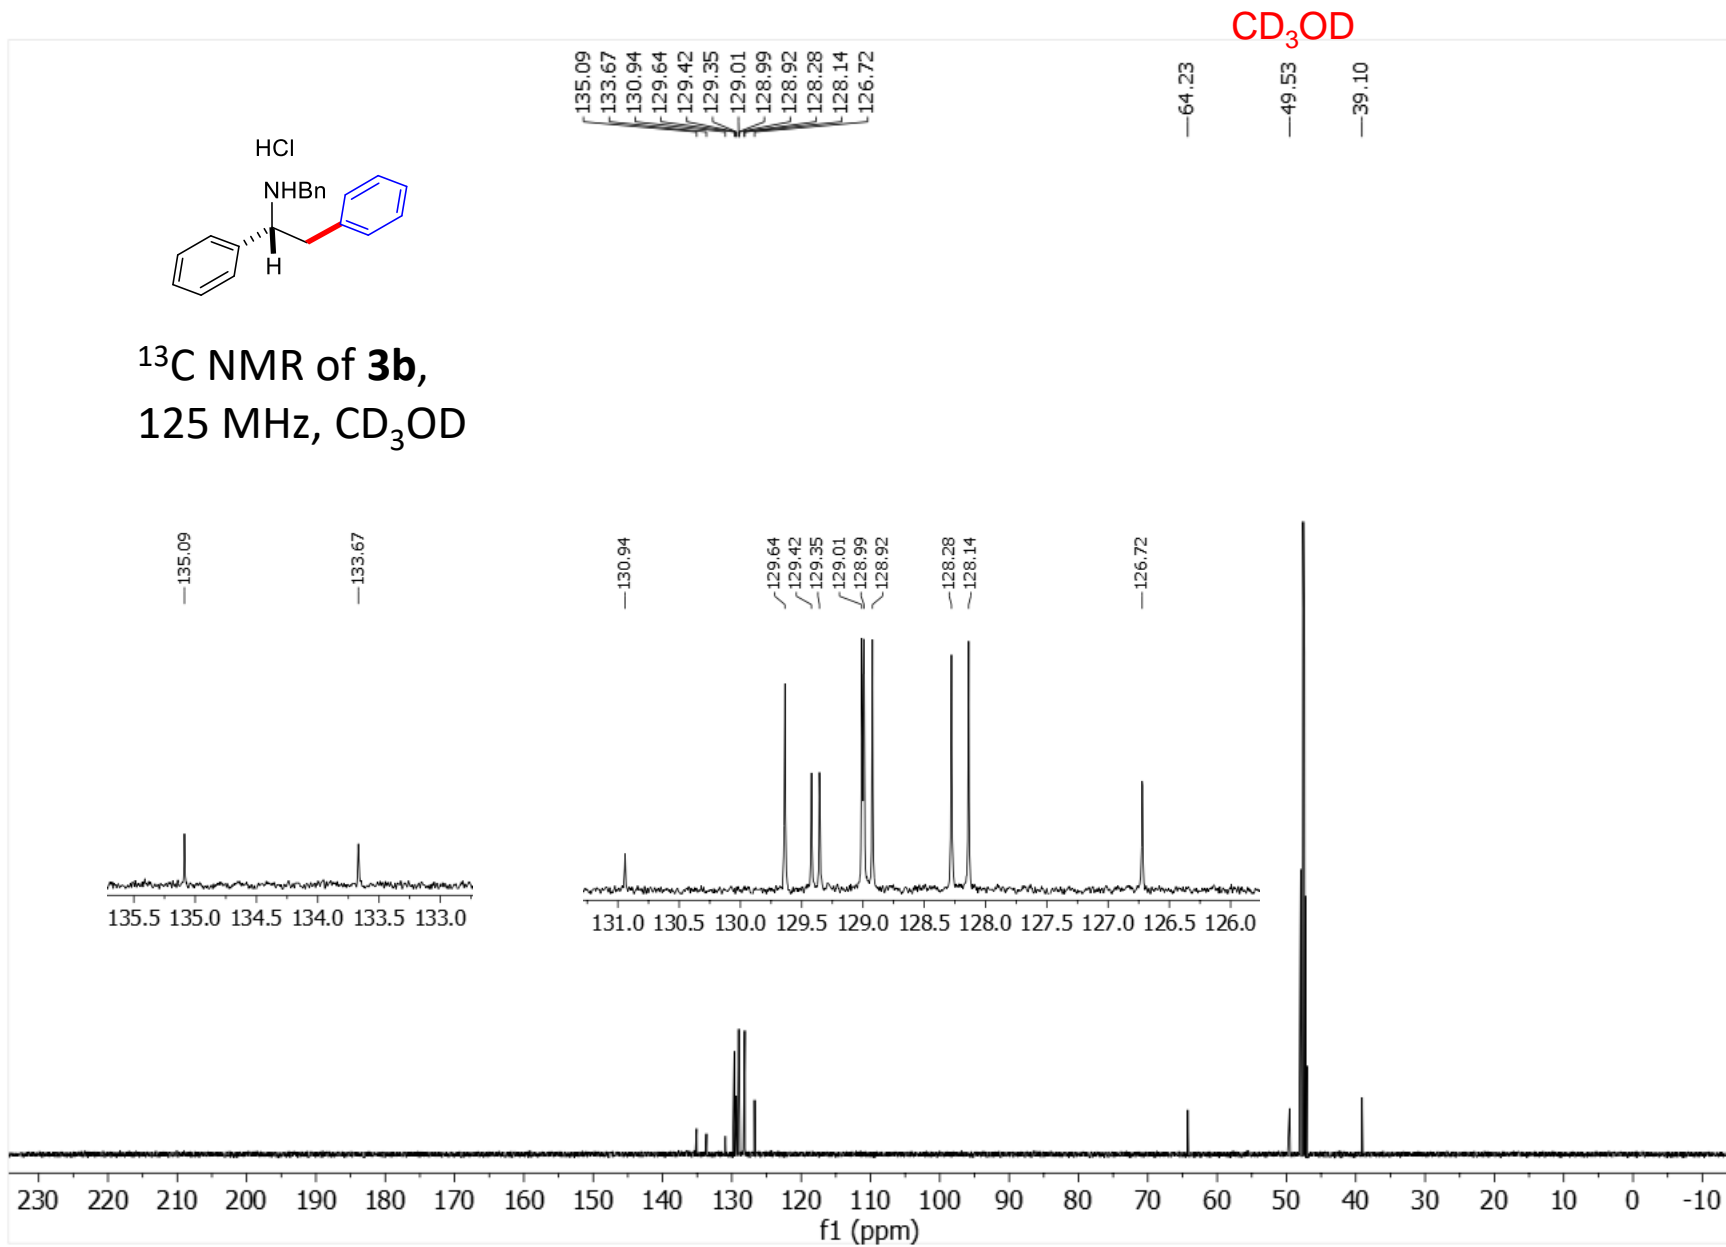



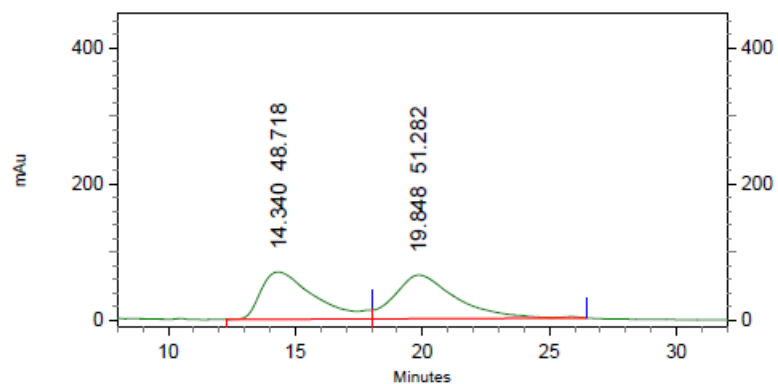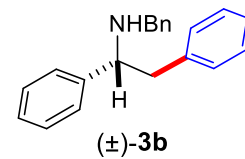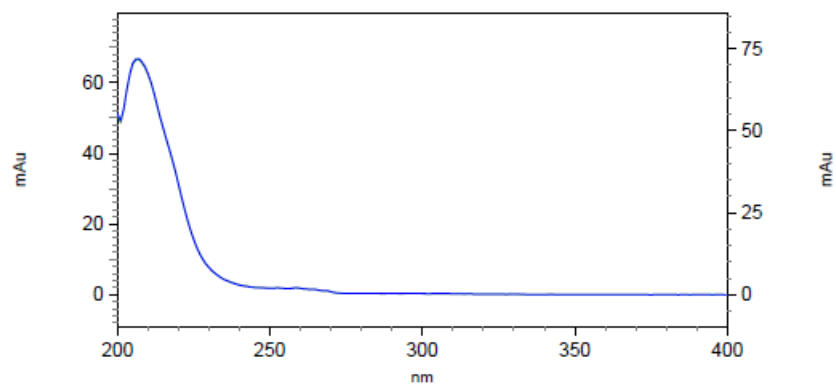

1: 207 nm, 4 nm

Results

| Name   | Retention Time | Area Percent | Pk # |
|--------|----------------|--------------|------|
|        | 14.340         | 48.718       | 1    |
|        | 19.848         | 51.282       | 2    |
| Totals |                | 100.000      |      |

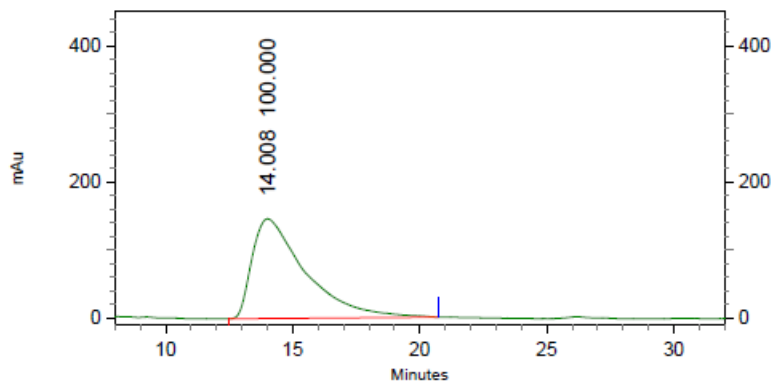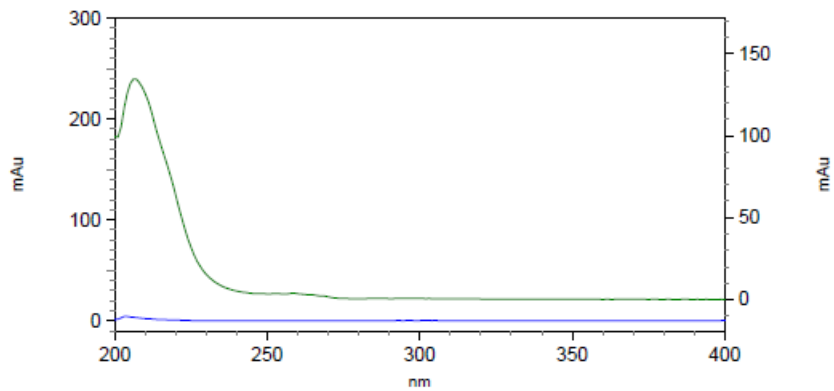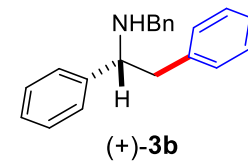

1: 207 nm, 4 nm

Results

| Name | Retention Time | Area Percent | Pk # |
|------|----------------|--------------|------|
|      | 14.008         | 100.000      | 1    |

|        |  |         |  |
|--------|--|---------|--|
| Totals |  | 100.000 |  |
|--------|--|---------|--|

CHCl<sub>3</sub>

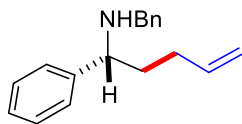

<sup>1</sup>H NMR of **3c**, 500 MHz, CDCl<sub>3</sub>

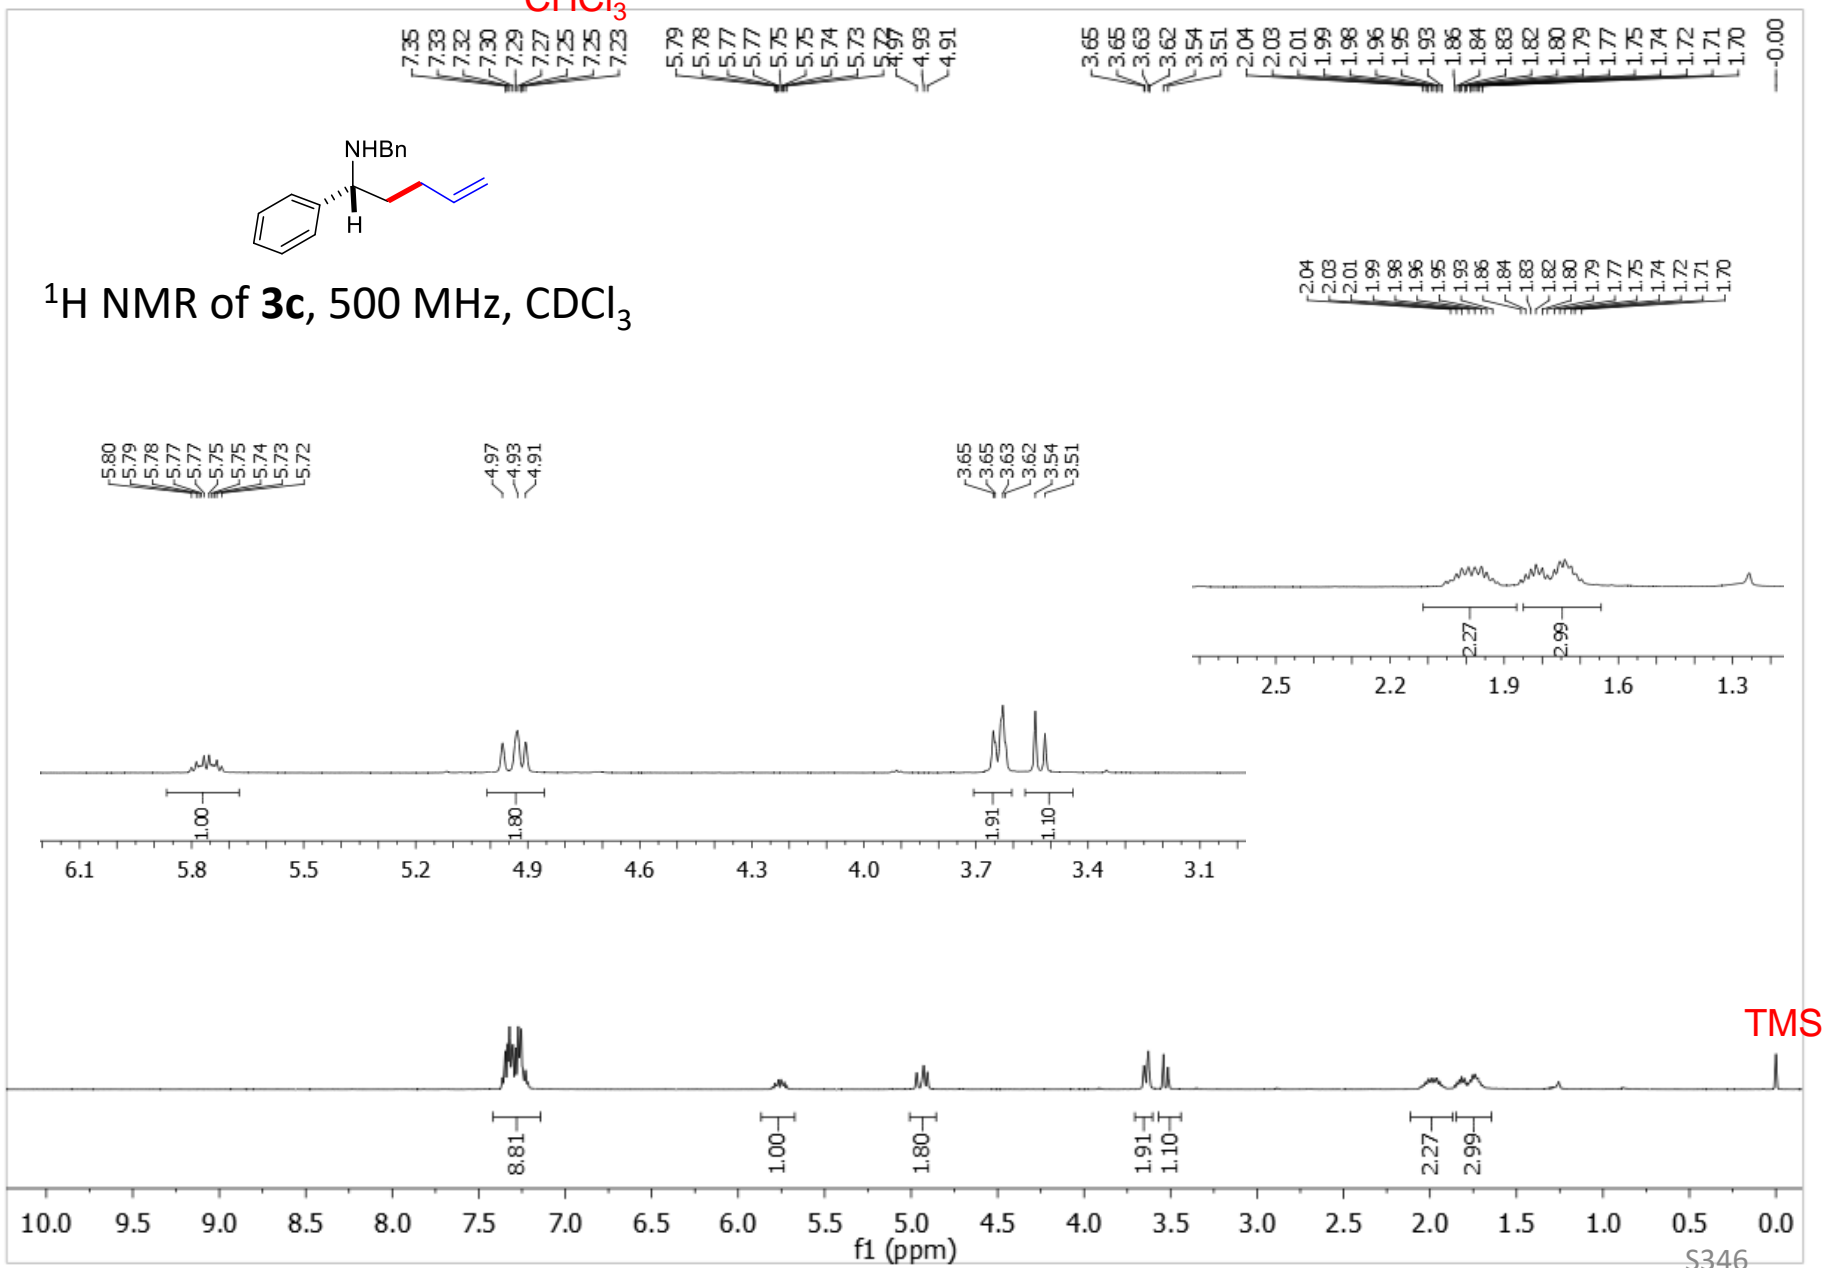

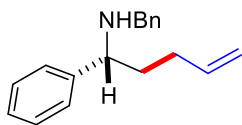

144.13  
140.81  
138.50  
128.55  
128.47  
128.30  
127.51  
126.97

CDCl<sub>3</sub>  
77.37  
77.16  
76.95

62.19

51.65

37.50

30.67

<sup>13</sup>C NMR of **3c**, 150 MHz, CDCl<sub>3</sub>

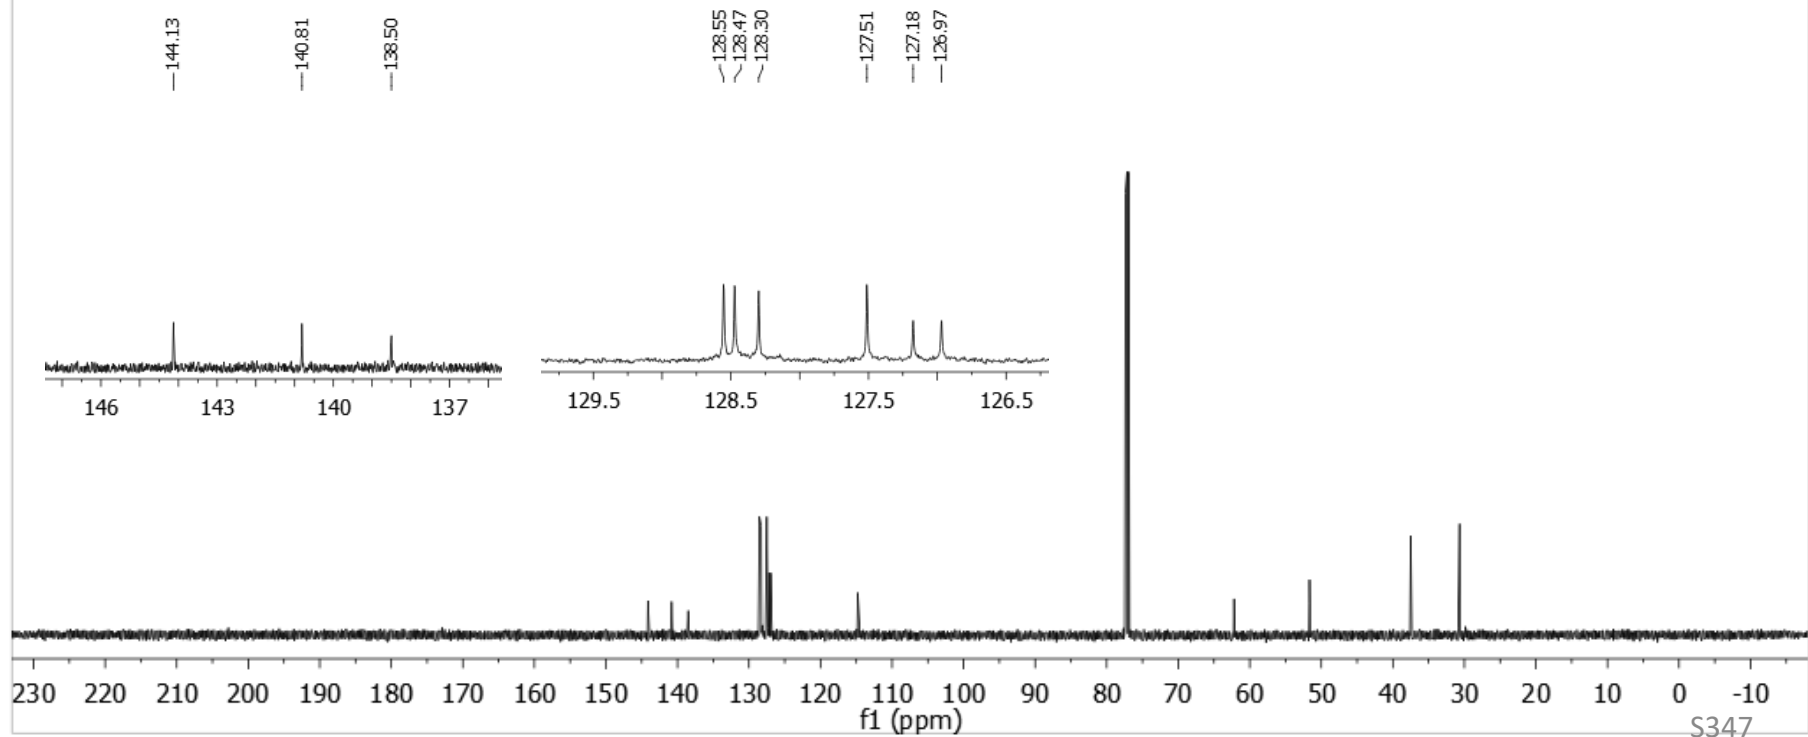

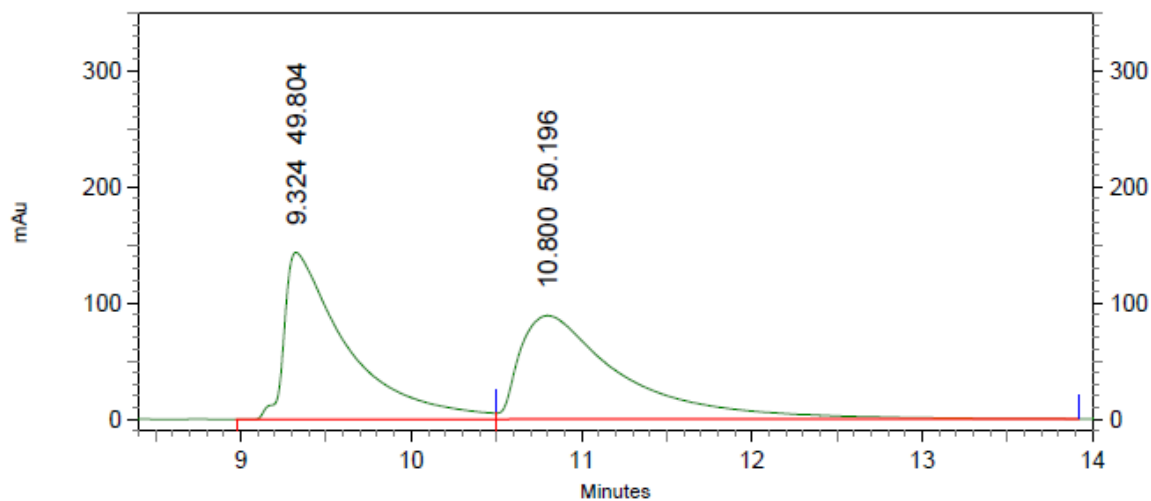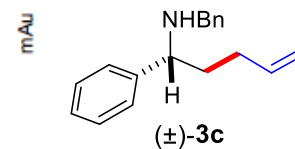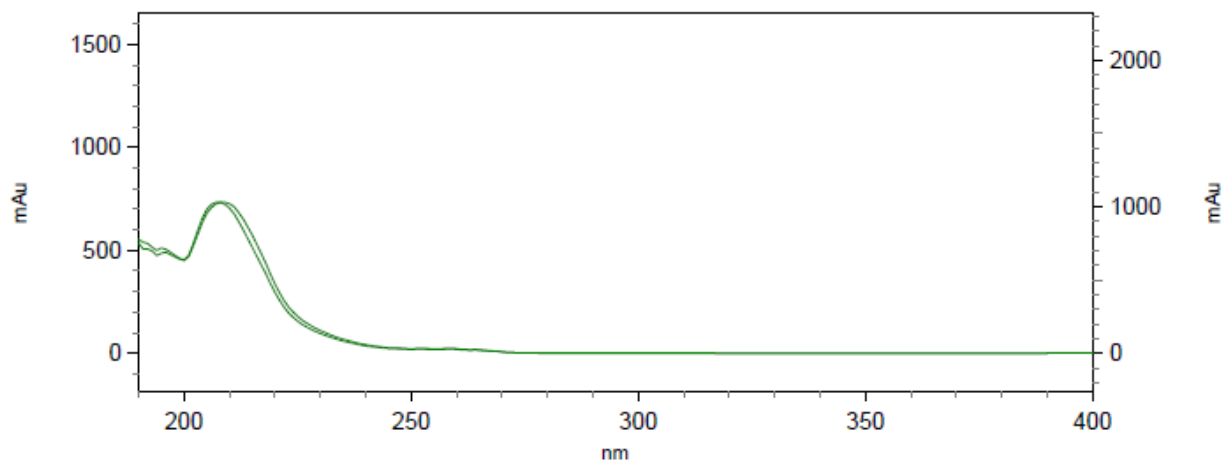

4: 224 nm, 4  
nm Results

| Pk #   | Retention Time | Area Percent |
|--------|----------------|--------------|
| 1      | 9.324          | 49.804       |
| 2      | 10.800         | 50.196       |
| Totals |                | 100.000      |

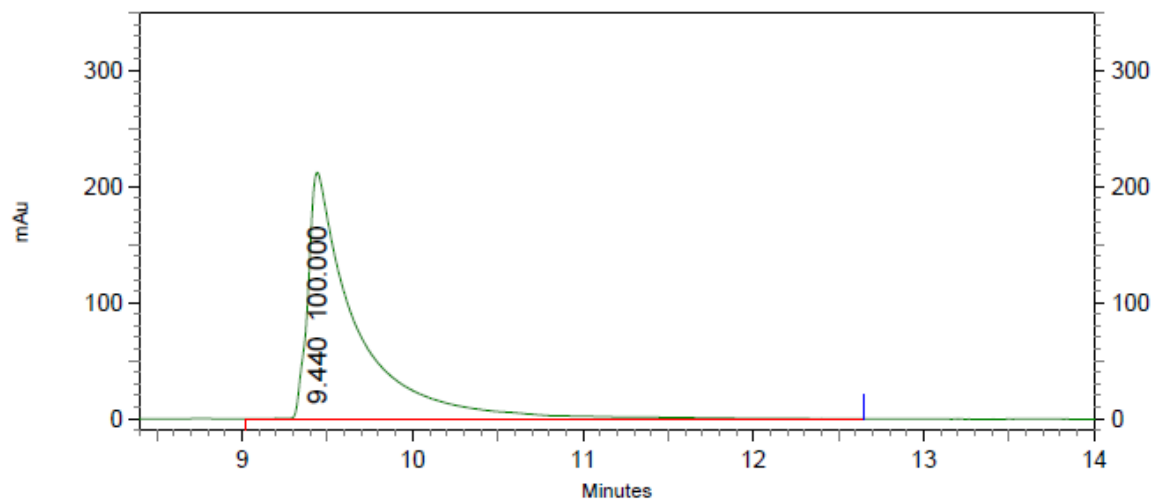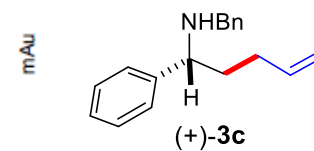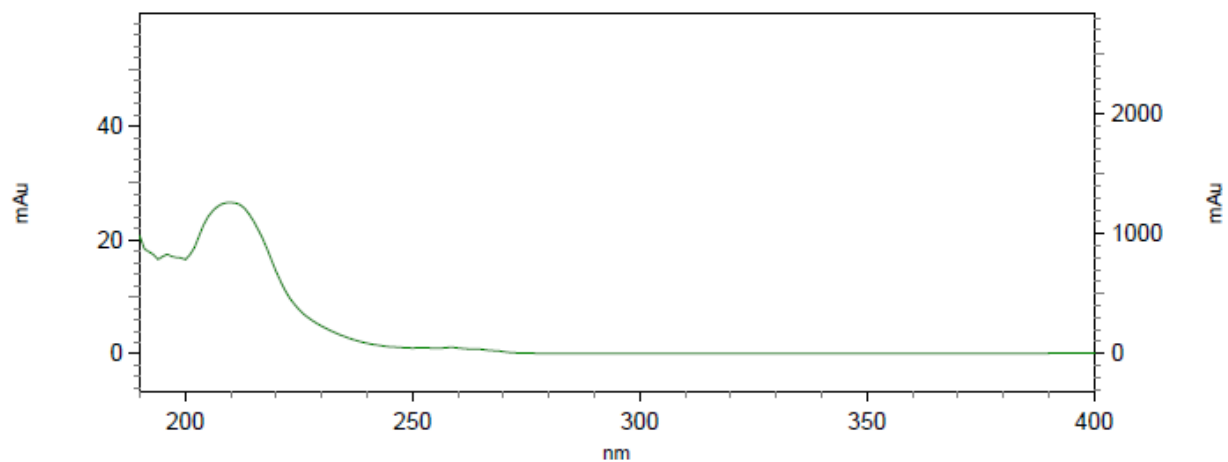

4: 224 nm, 4  
nm Results

| Pk # | Retention Time | Area Percent |
|------|----------------|--------------|
| 1    | 9.440          | 100.000      |

|        |         |
|--------|---------|
| Totals | 100.000 |
|--------|---------|

CHCl<sub>3</sub>

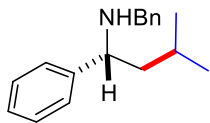

<sup>1</sup>H NMR of **3d**, 500 MHz, CDCl<sub>3</sub>

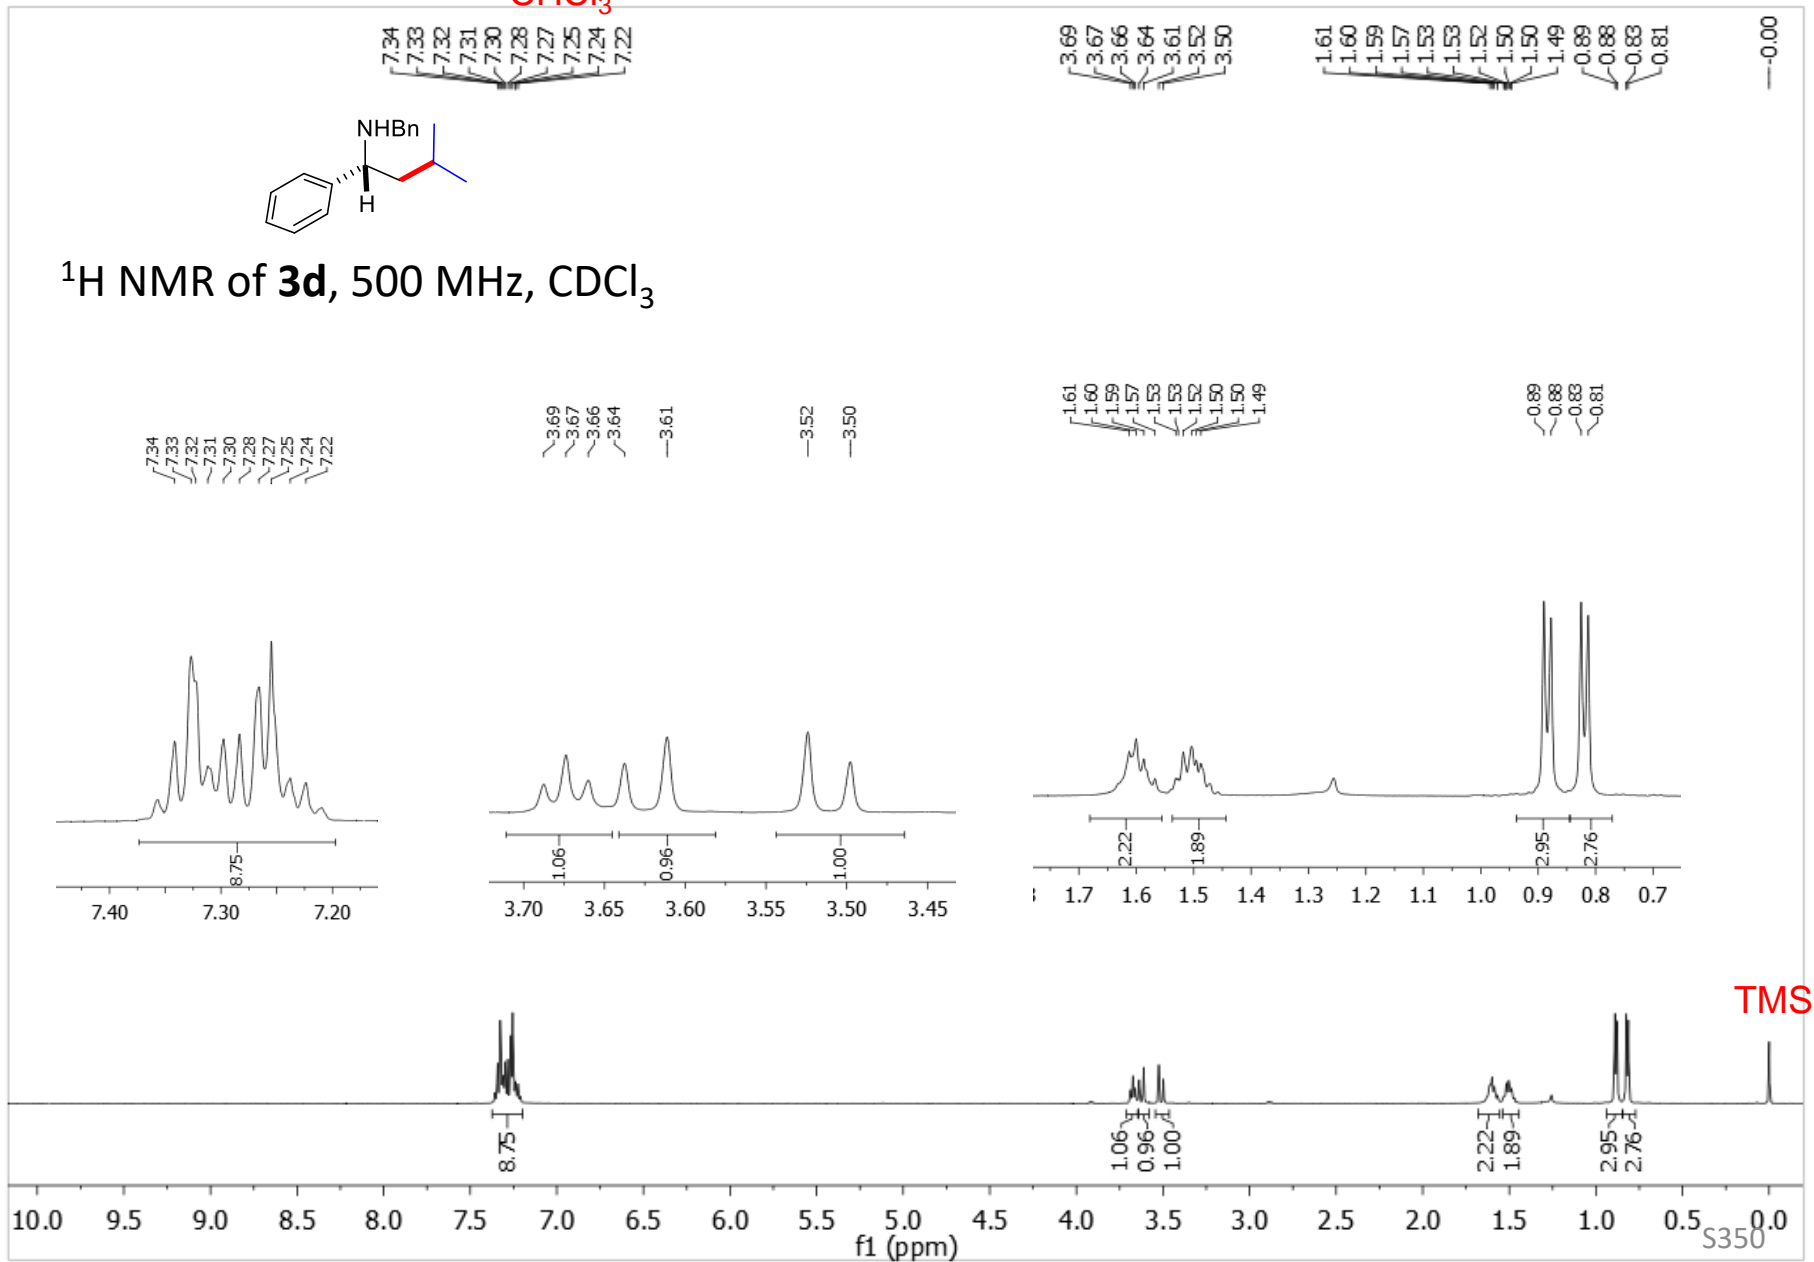

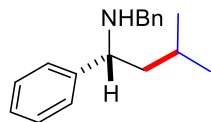

$^{13}\text{C}$  NMR of **3d**, 125 MHz,  $\text{CDCl}_3$

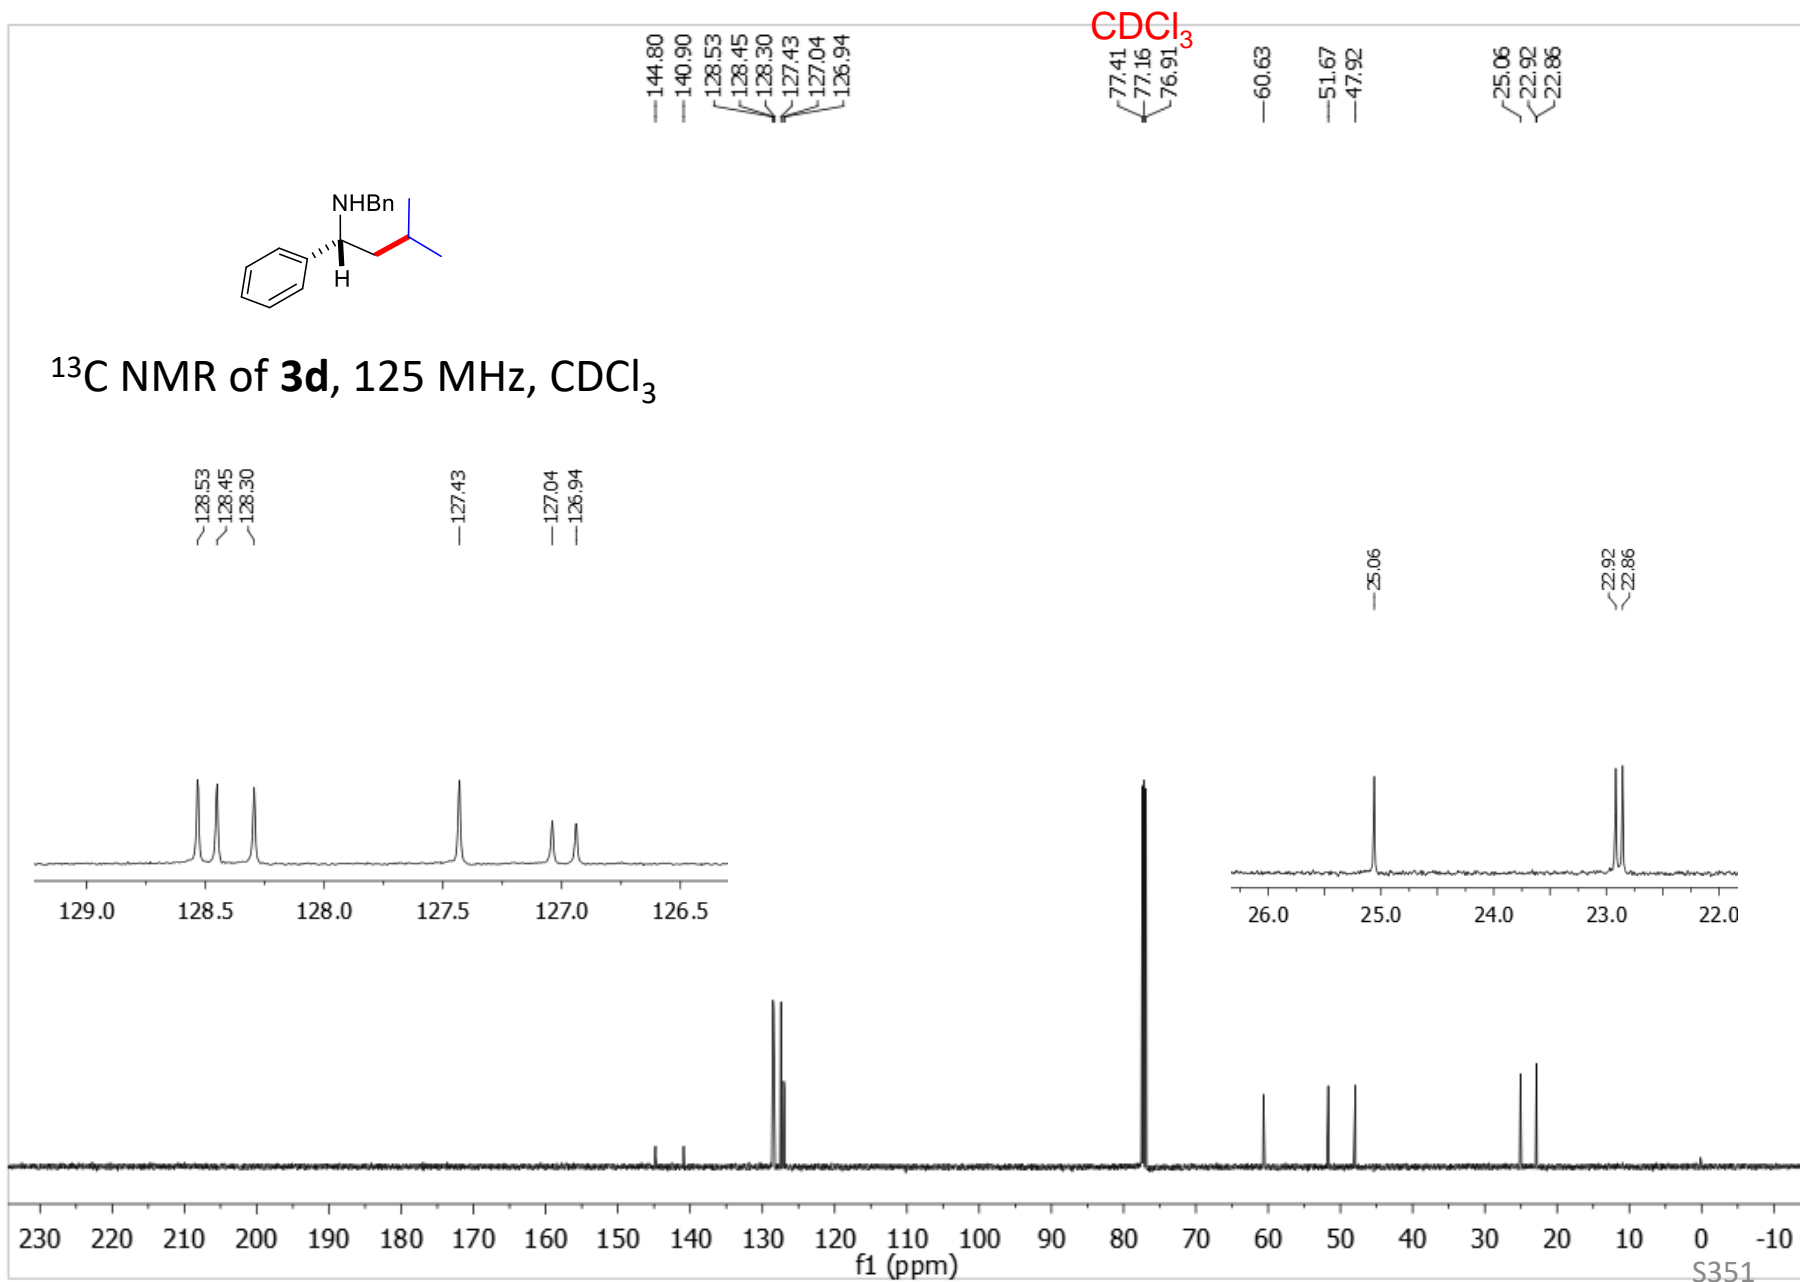



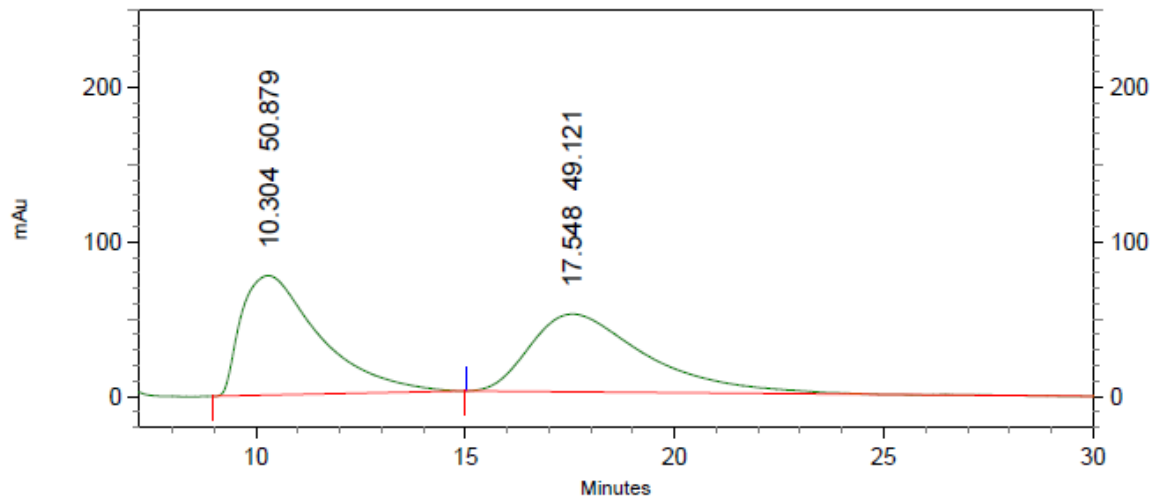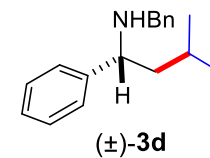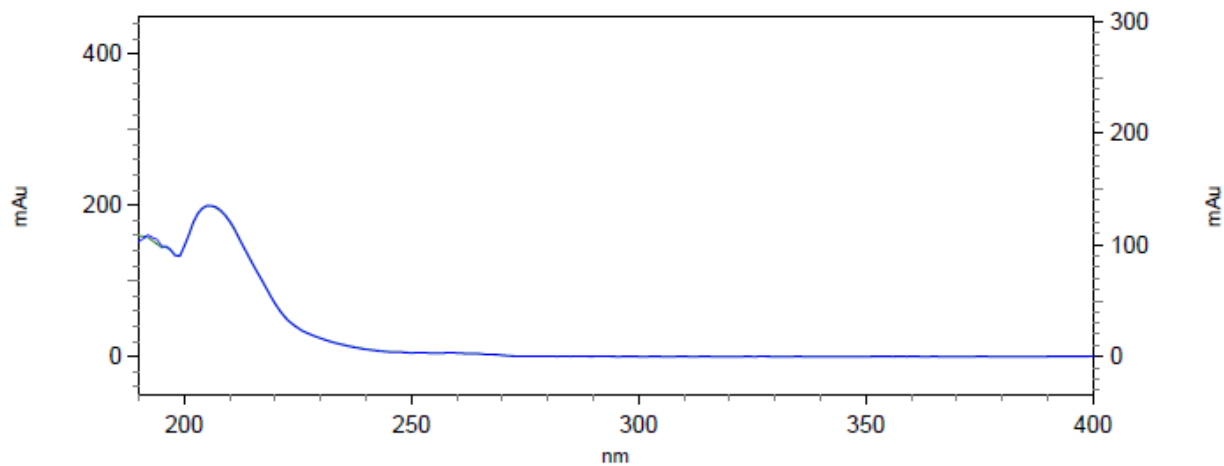

4: 212 nm, 4  
nm Results

| Pk # | Retention Time | Area Percent |
|------|----------------|--------------|
| 1    | 10.304         | 50.879       |
| 2    | 17.548         | 49.121       |

|        |         |
|--------|---------|
| Totals | 100.000 |
|--------|---------|

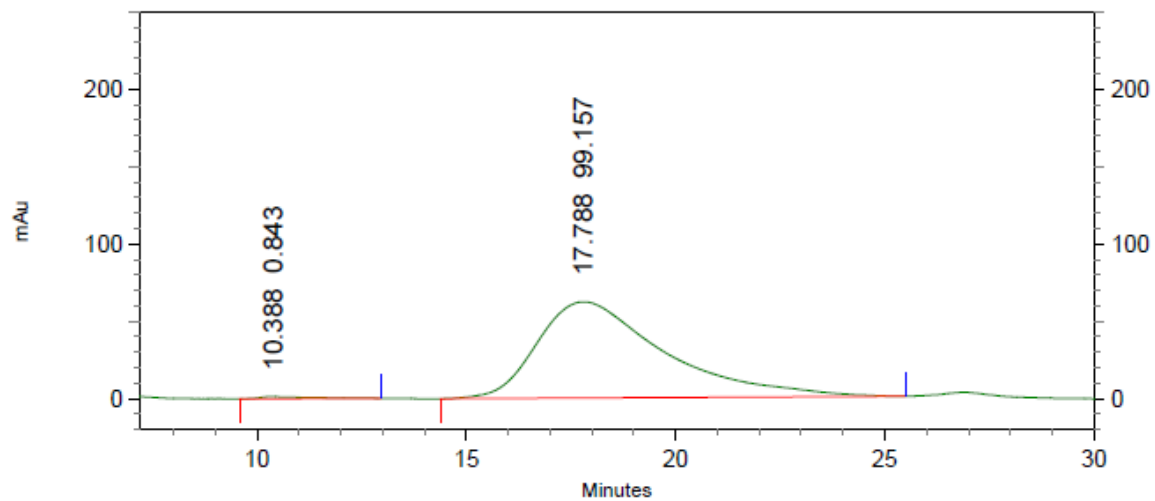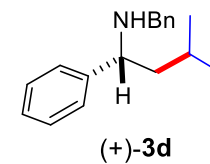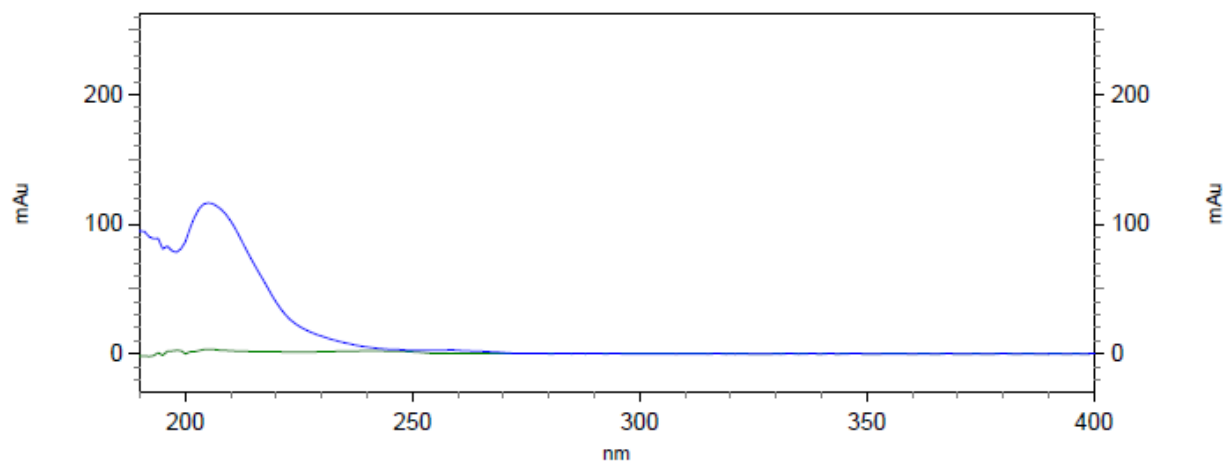

4: 212 nm, 4  
nm Results

|        | Pk # | Retention Time | Area Percent |
|--------|------|----------------|--------------|
|        | 1    | 10.388         | 0.843        |
|        | 2    | 17.788         | 99.157       |
| Totals |      |                | 100.000      |

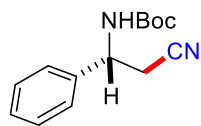

$^1\text{H}$  NMR of **3e**, 400 MHz,  $\text{CDCl}_3$

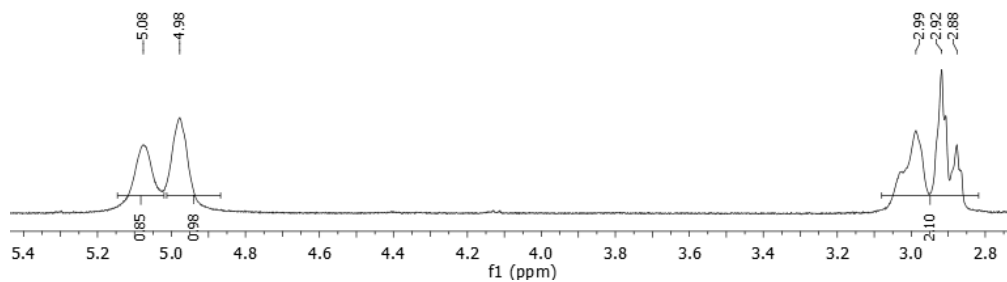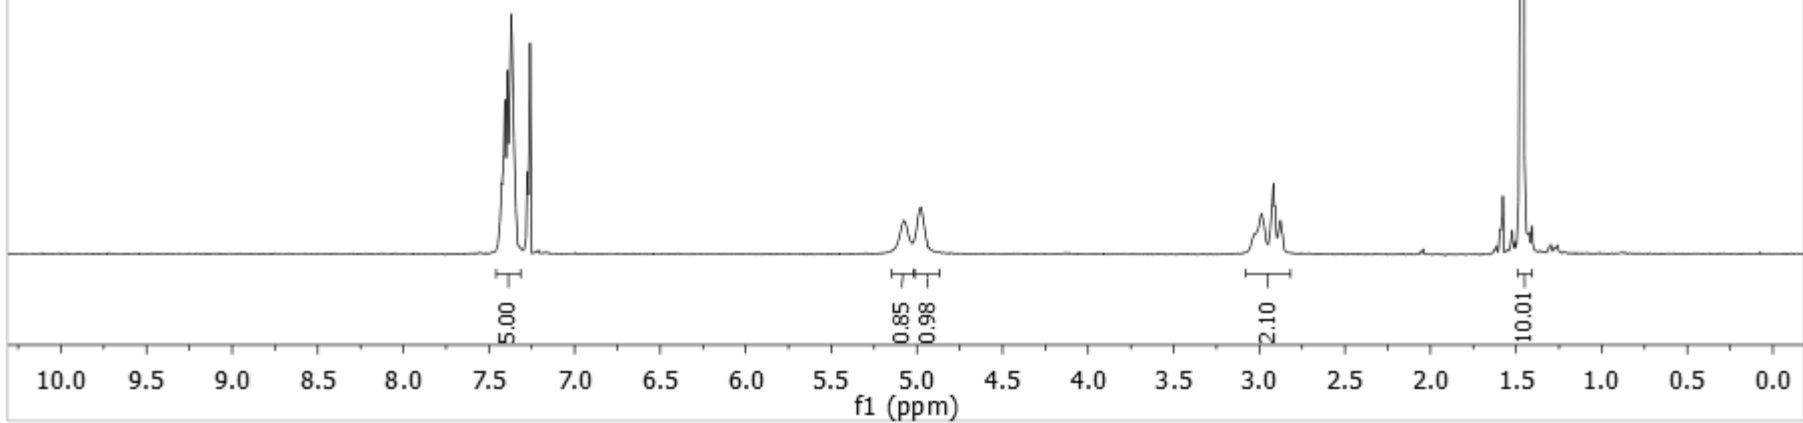

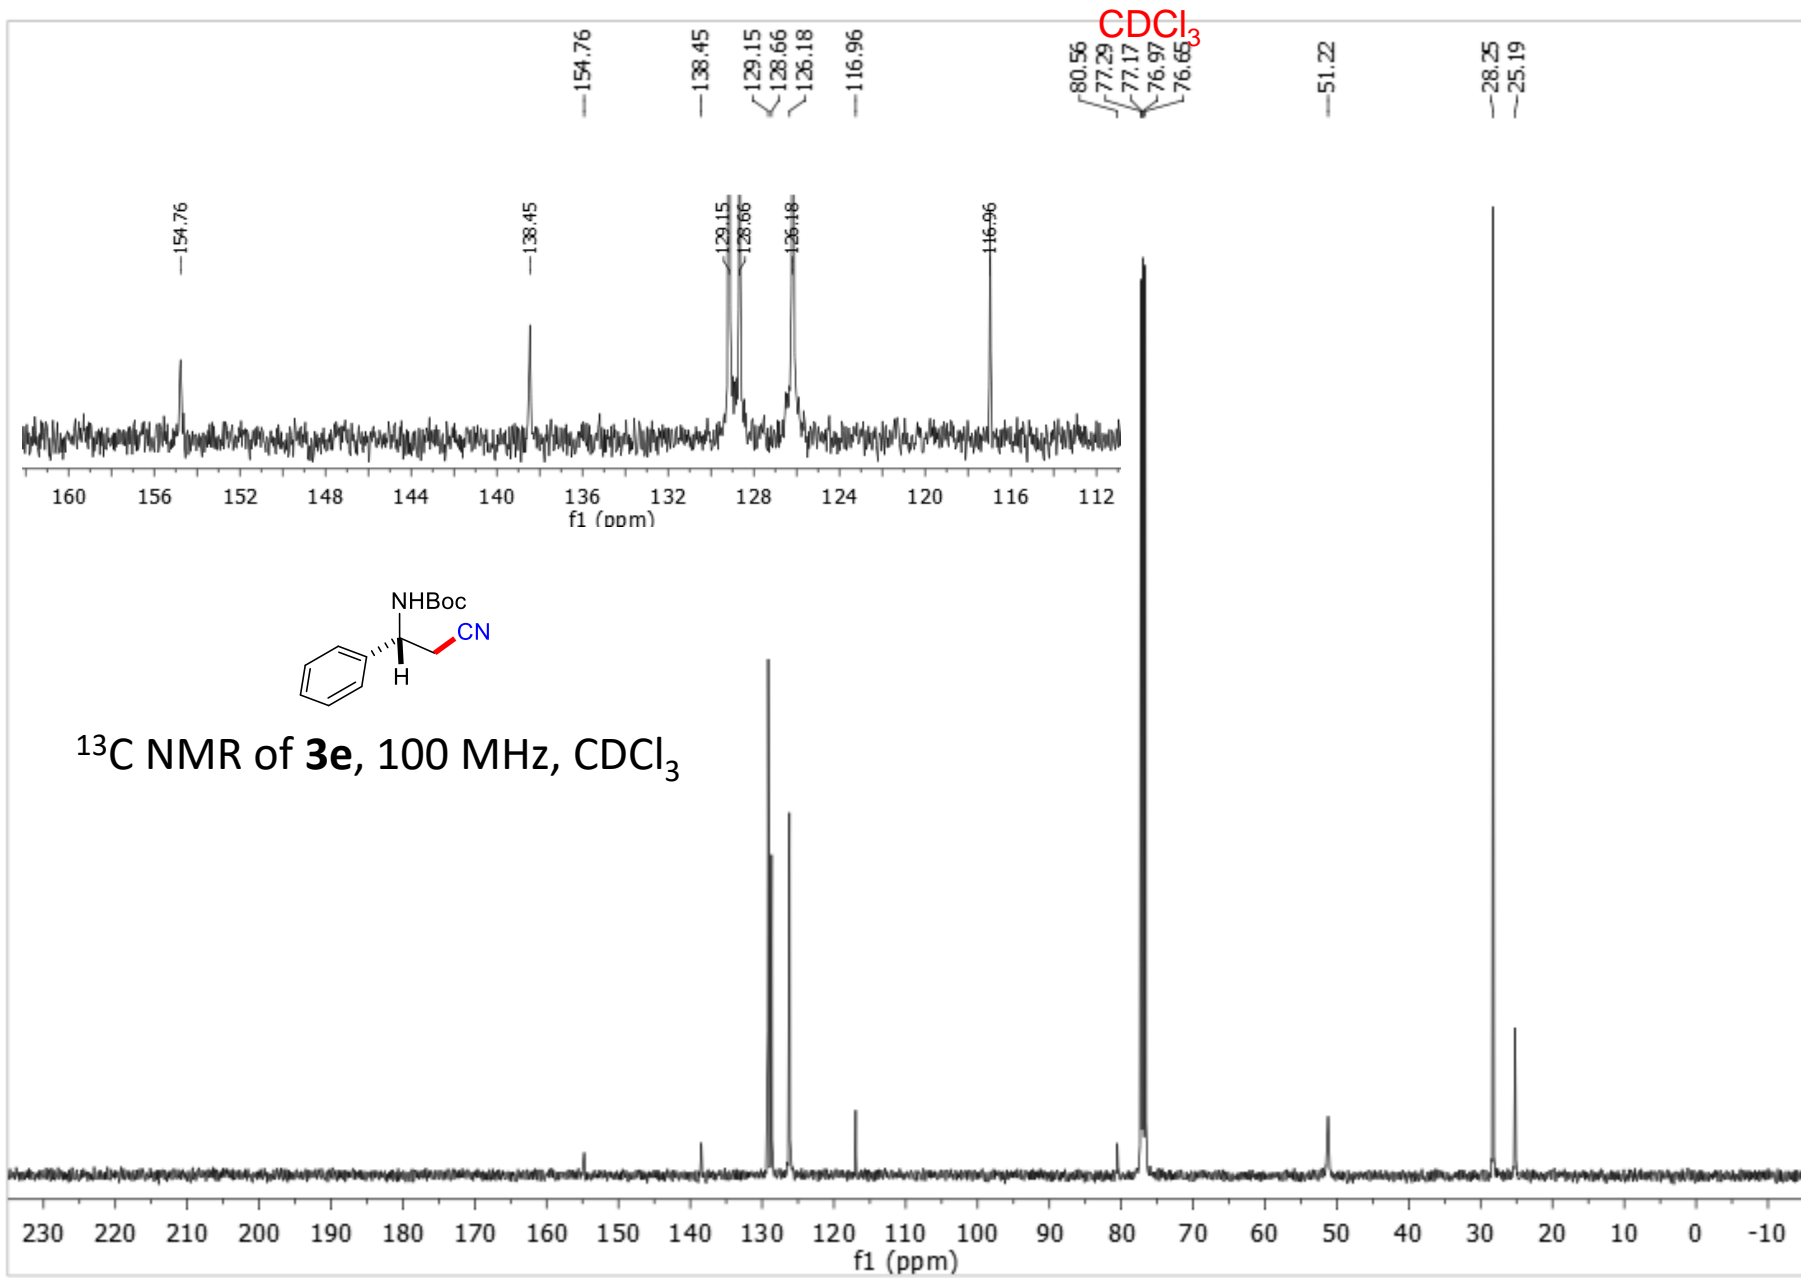

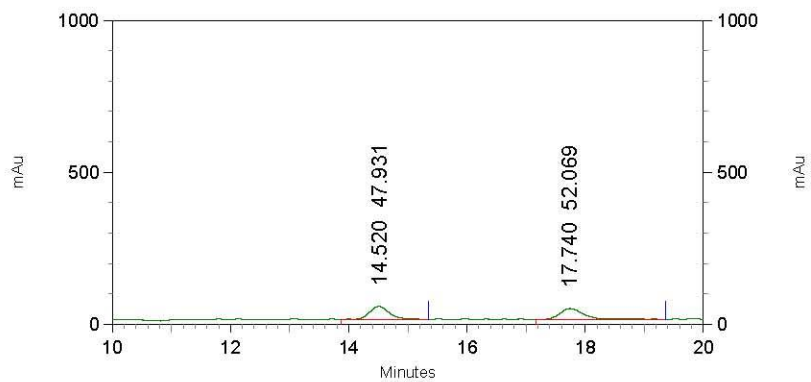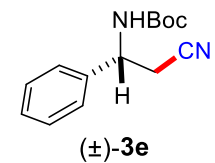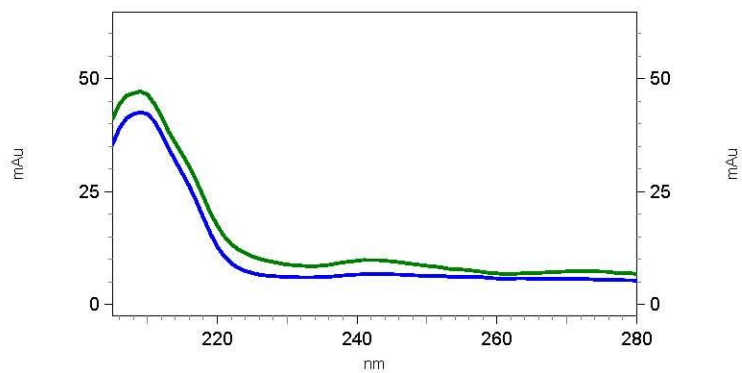

4: 202 nm, 4 nm  
Results

| Pk #   | Name | Retention Time | Area Percent |
|--------|------|----------------|--------------|
| 1      |      | 14.520         | 47.931       |
| 2      |      | 17.740         | 52.069       |
| Totals |      |                | 100.000      |

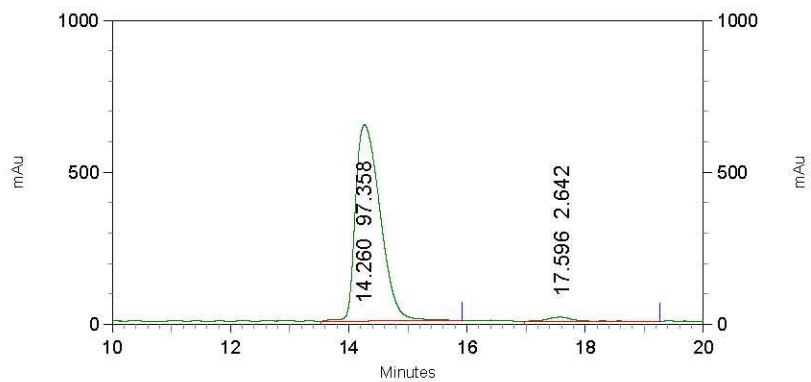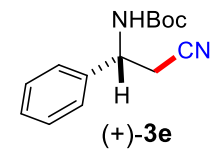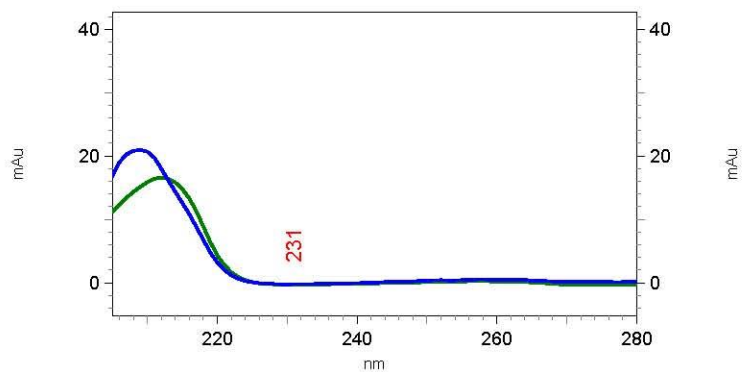

4: 202 nm, 4 nm  
Results

| Pk #   | Name | Retention Time | Area Percent |
|--------|------|----------------|--------------|
| 1      |      | 14.260         | 97.358       |
| 2      |      | 17.596         | 2.642        |
| Totals |      |                | 100.000      |

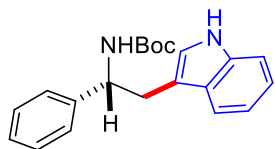

$^1\text{H}$  NMR of **3f**,  
600 MHz,  $\text{CDCl}_3$

$\text{CHCl}_3$

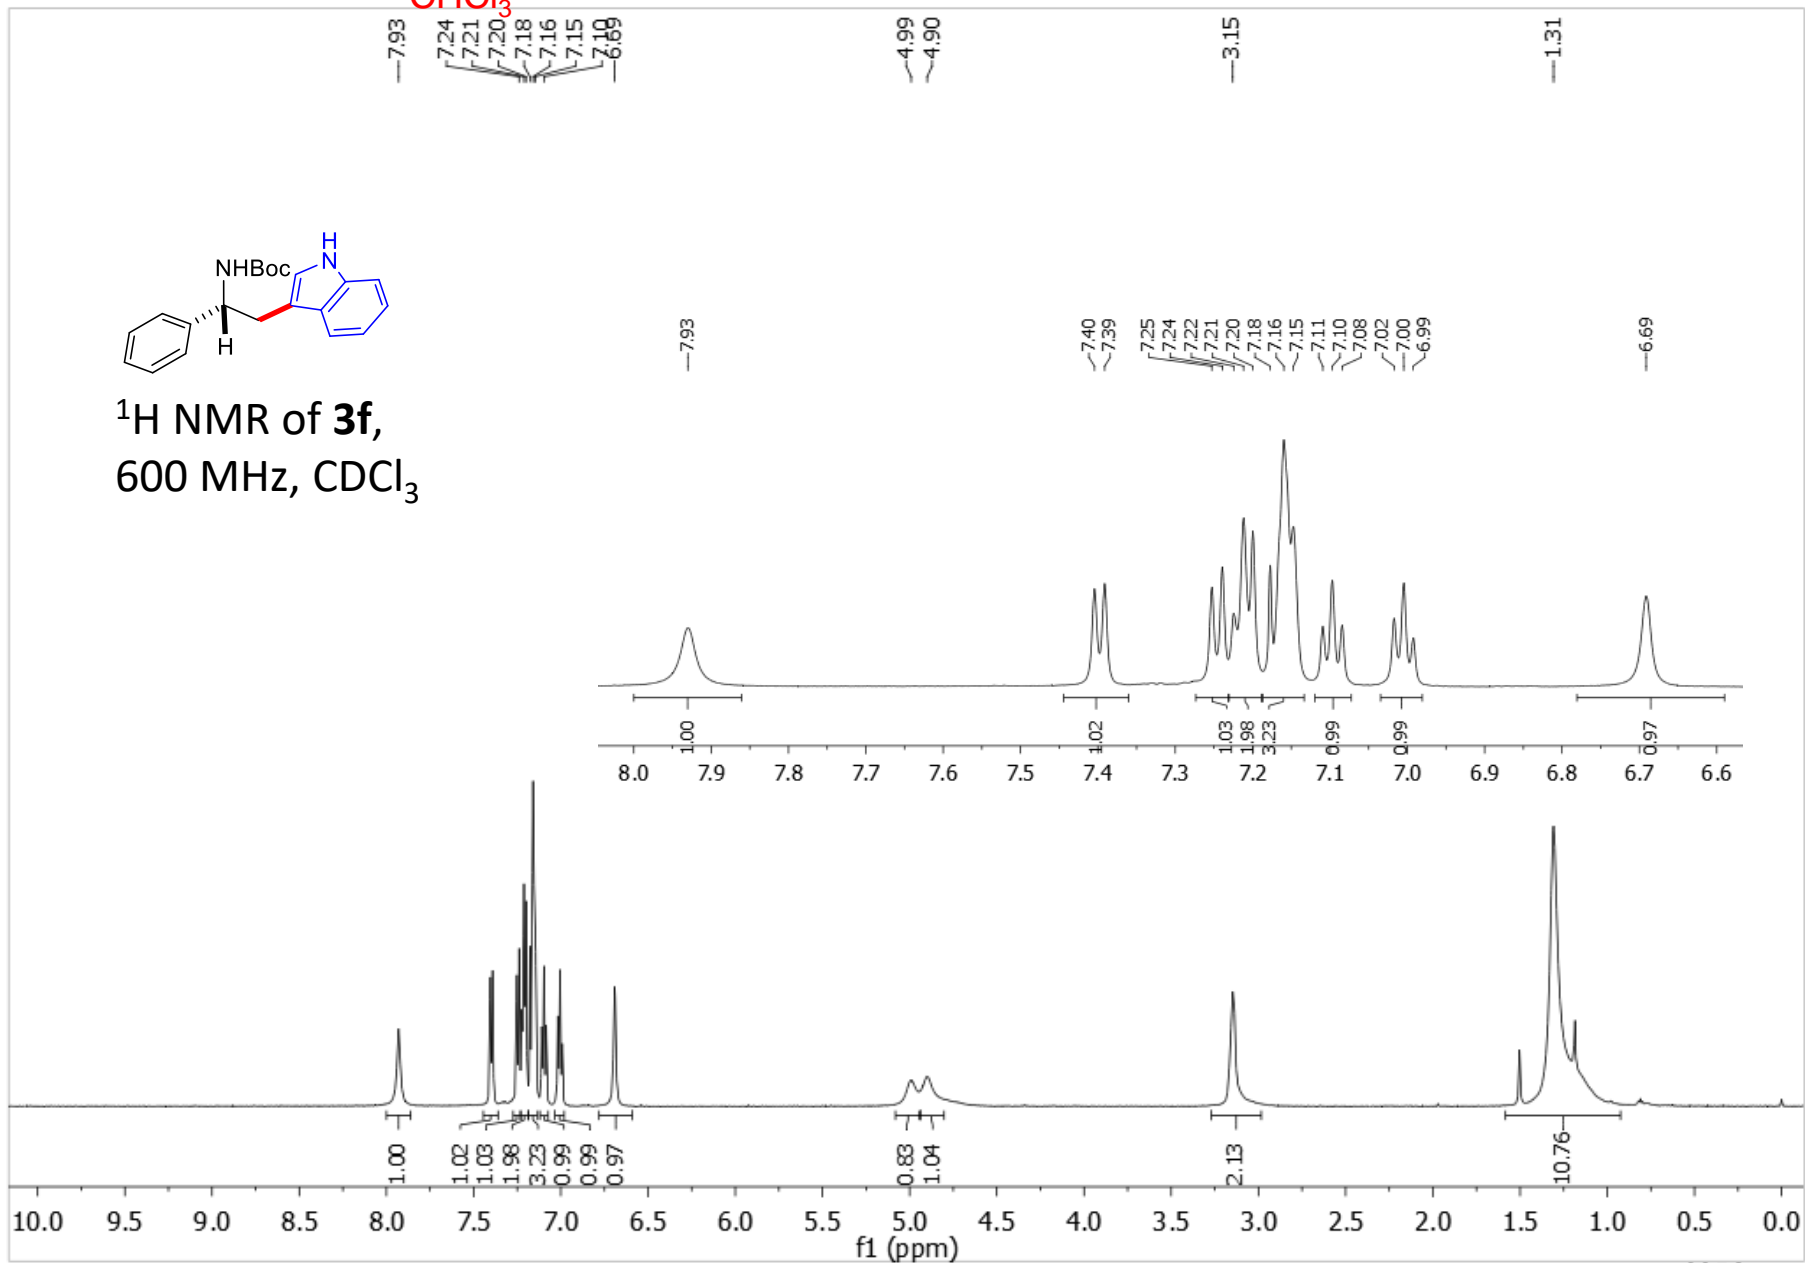

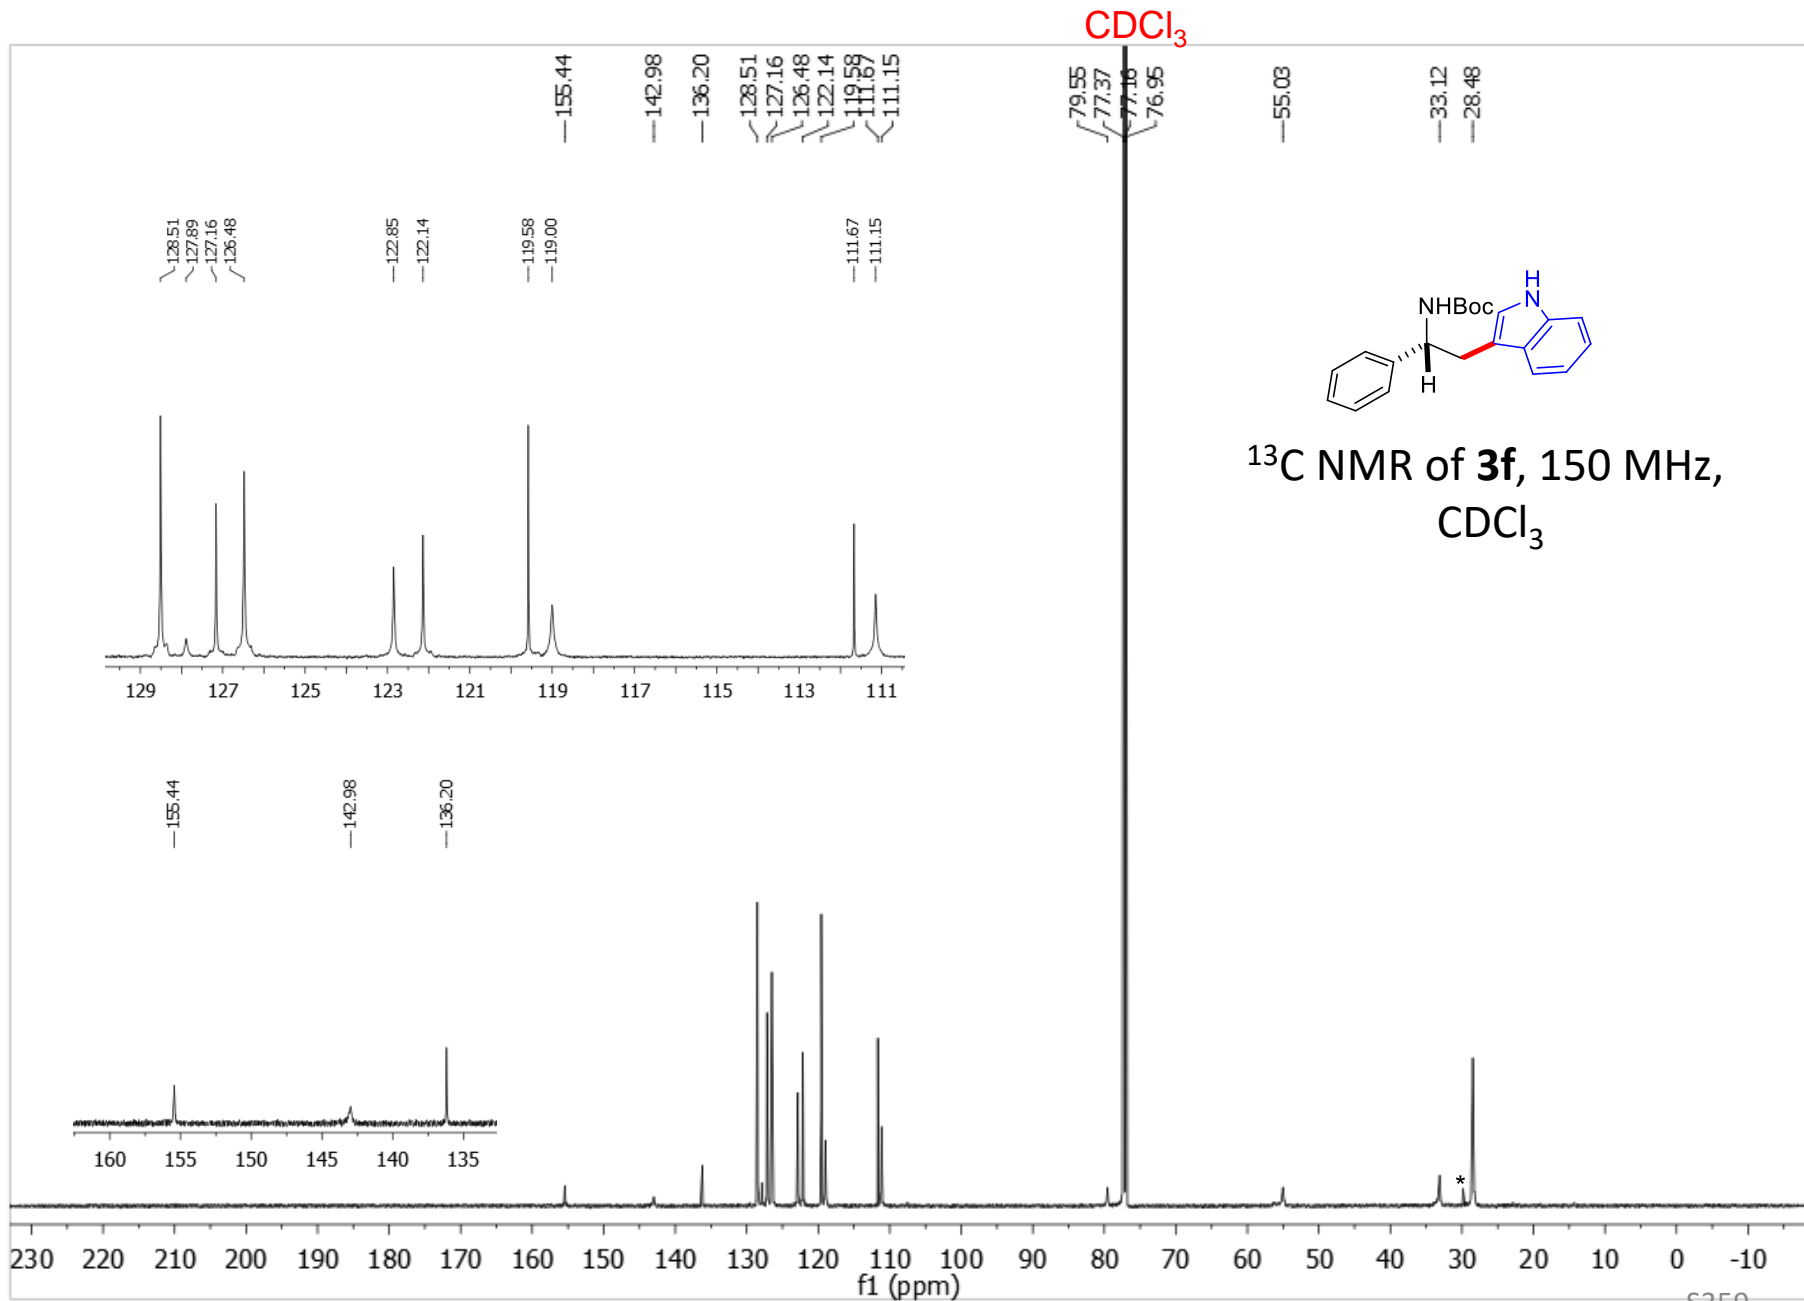



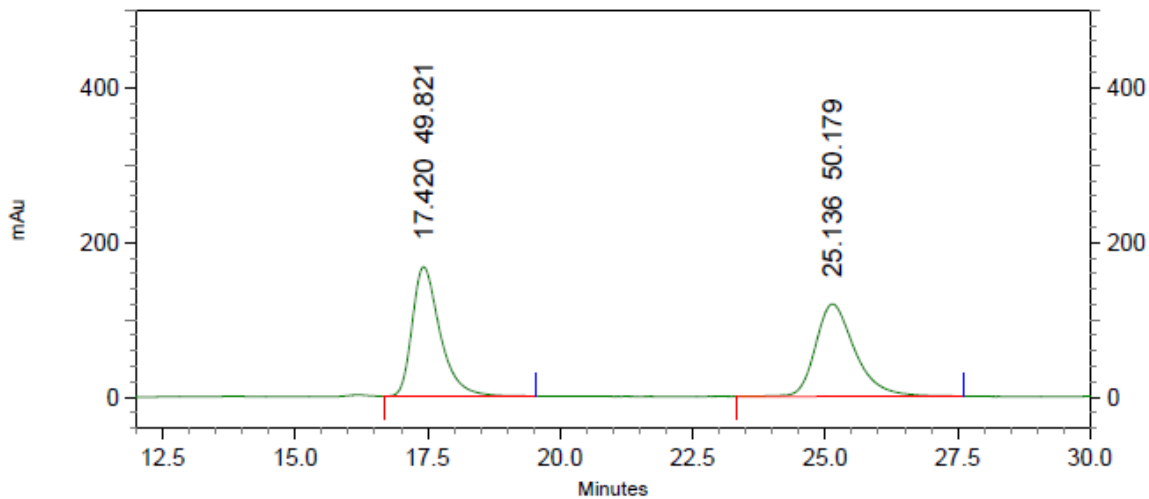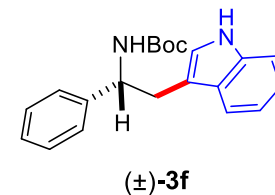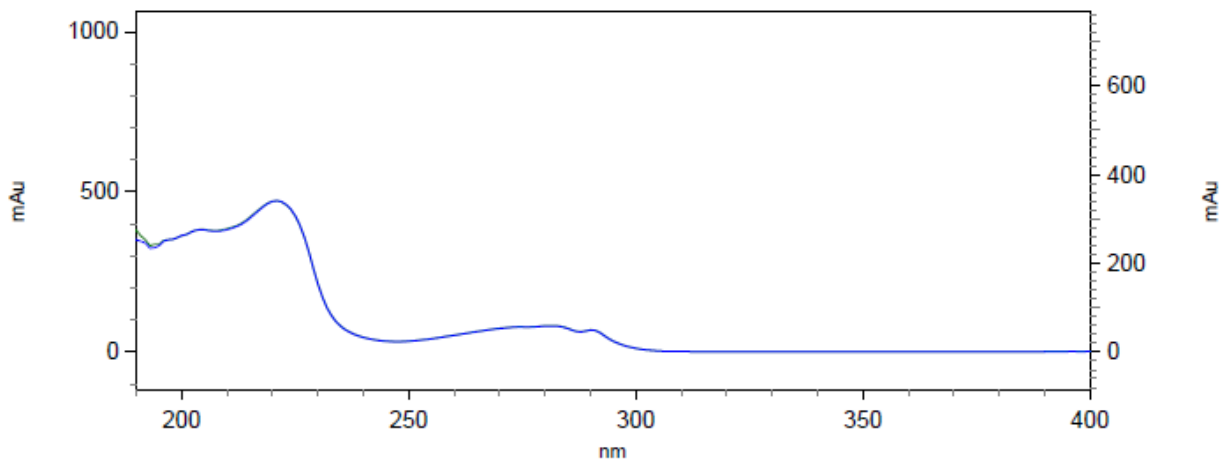

4: 235 nm, 4  
nm Results

| Pk # | Retention Time | Area Percent |
|------|----------------|--------------|
| 1    | 17.420         | 49.821       |
| 2    | 25.136         | 50.179       |

|        |         |
|--------|---------|
| Totals | 100.000 |
|--------|---------|

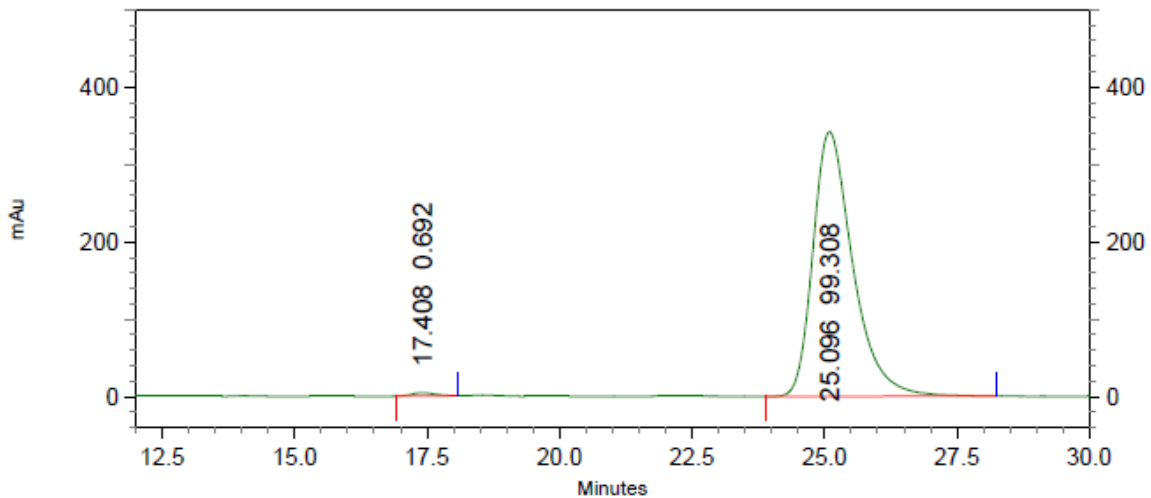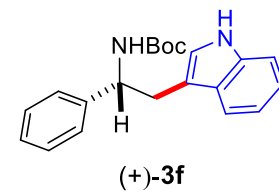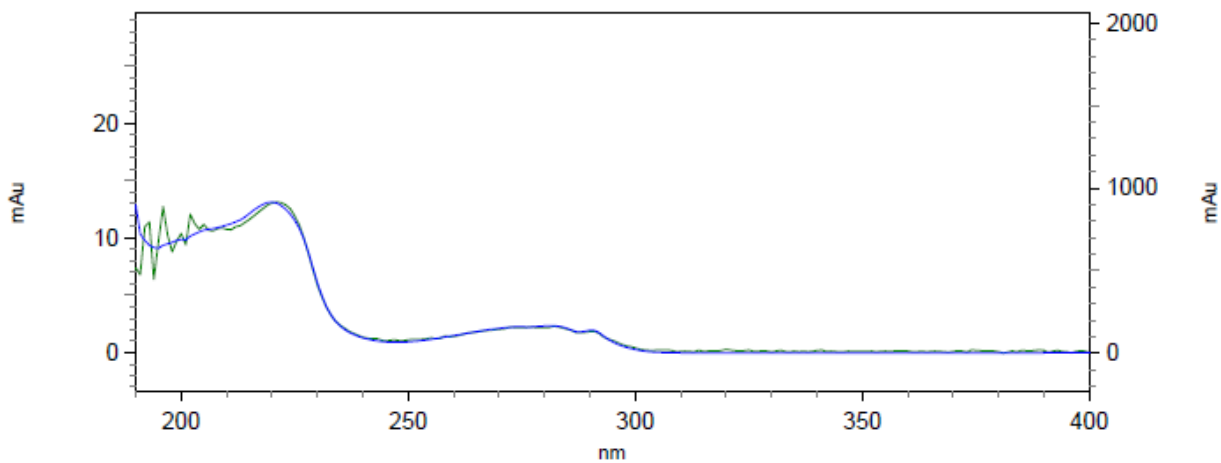

4: 235 nm, 4  
nm Results

| Pk # | Retention Time | Area Percent |
|------|----------------|--------------|
| 1    | 17.408         | 0.692        |
| 2    | 25.096         | 99.308       |

|        |         |
|--------|---------|
| Totals | 100.000 |
|--------|---------|

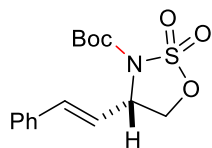

$^1\text{H}$  NMR of *N*-Boc-2o, 500 MHz,  $\text{CDCl}_3$

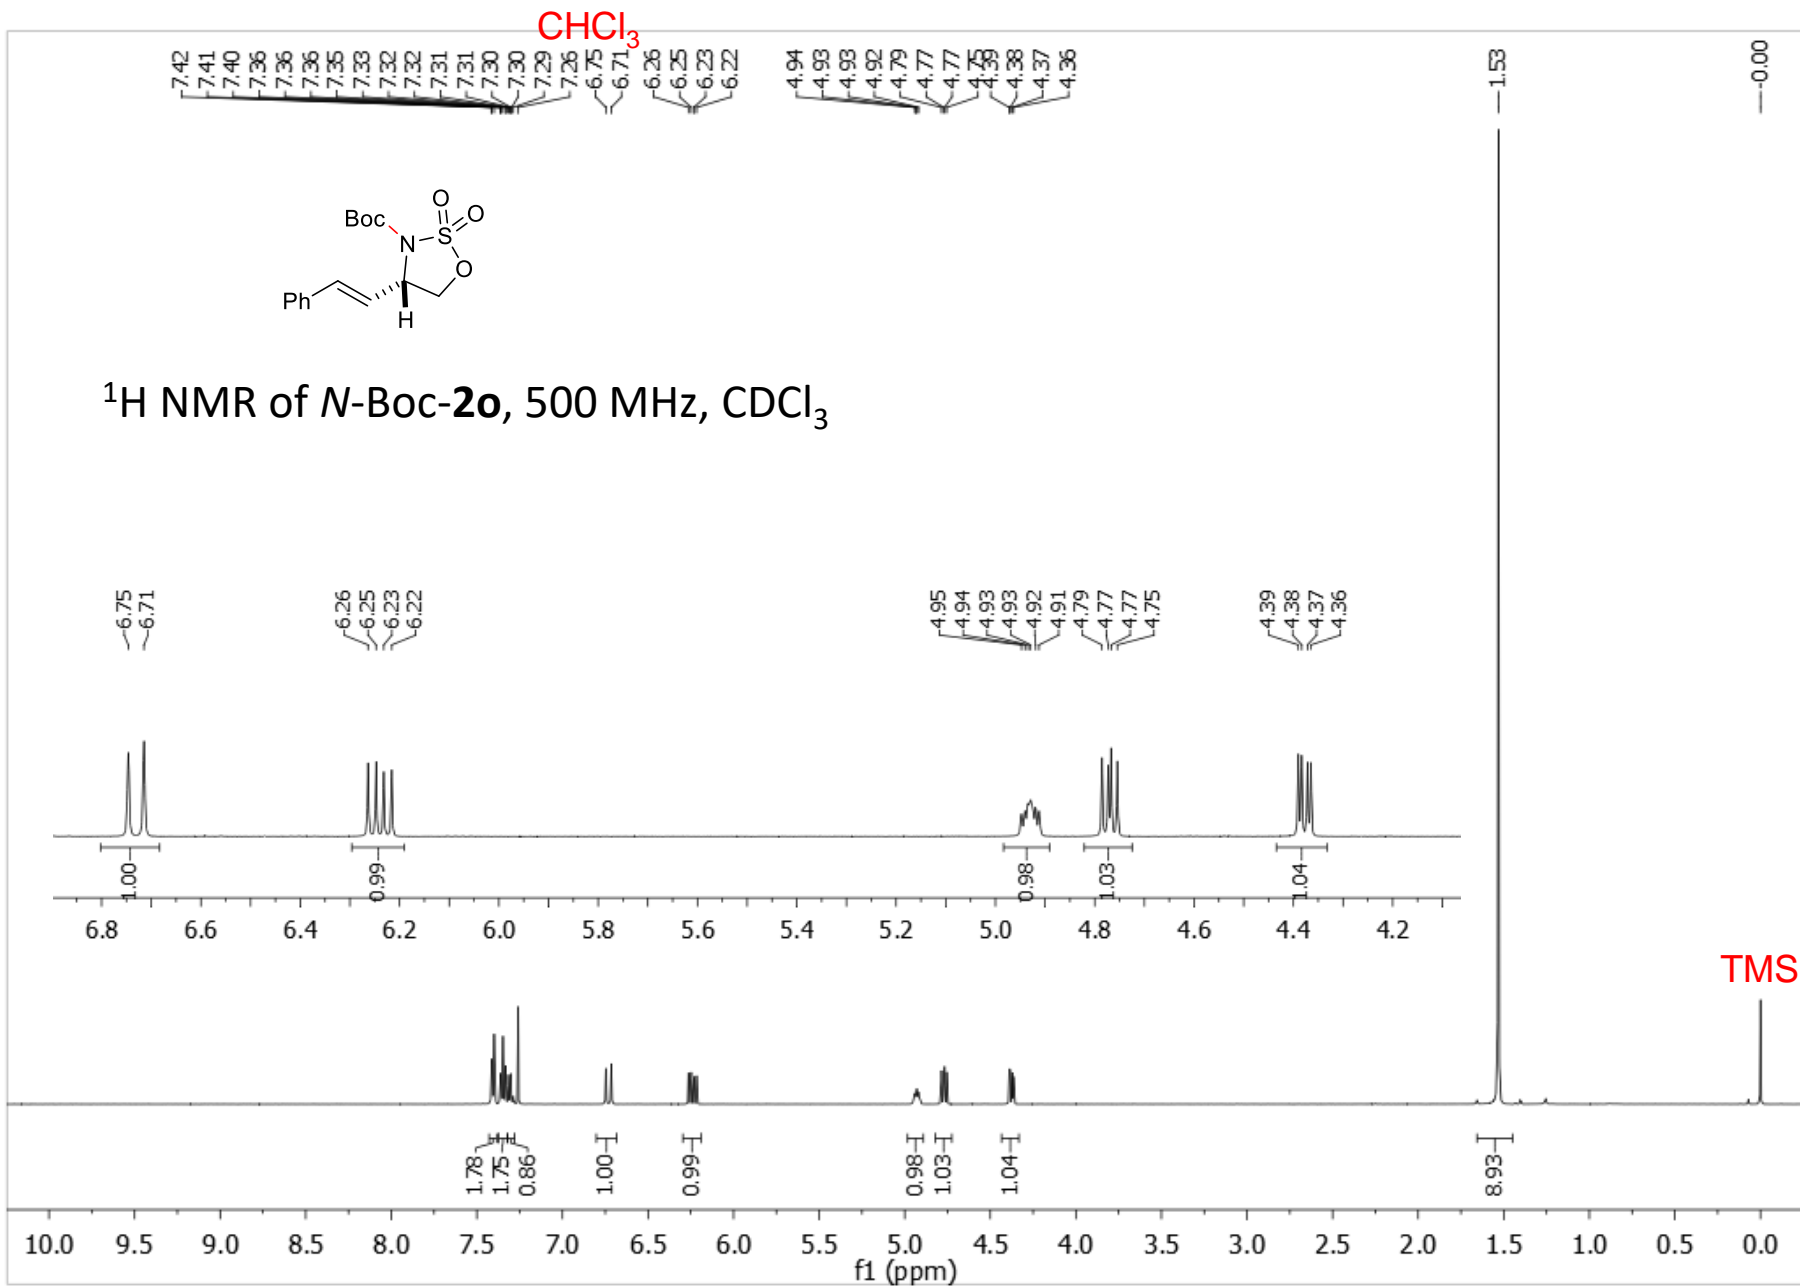

CDCl<sub>3</sub>



<sup>13</sup>C NMR of *N*-Boc-2o, 150 MHz, CDCl<sub>3</sub>

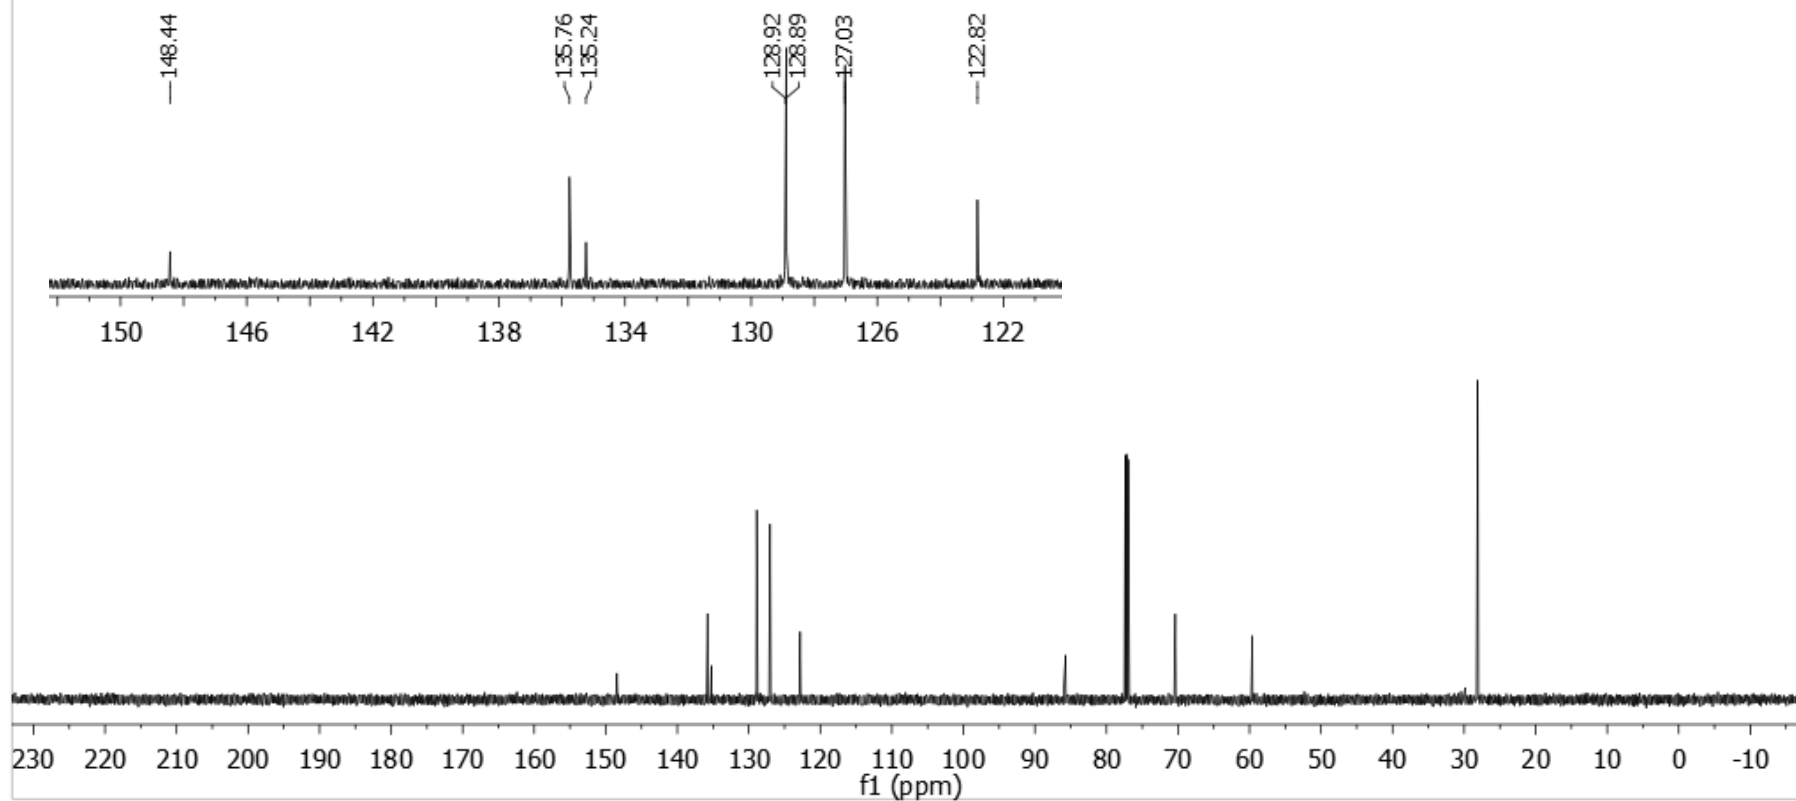

CHCl<sub>3</sub>

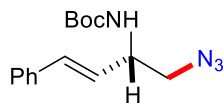

<sup>1</sup>H NMR of **3g**, 600 MHz, CDCl<sub>3</sub>

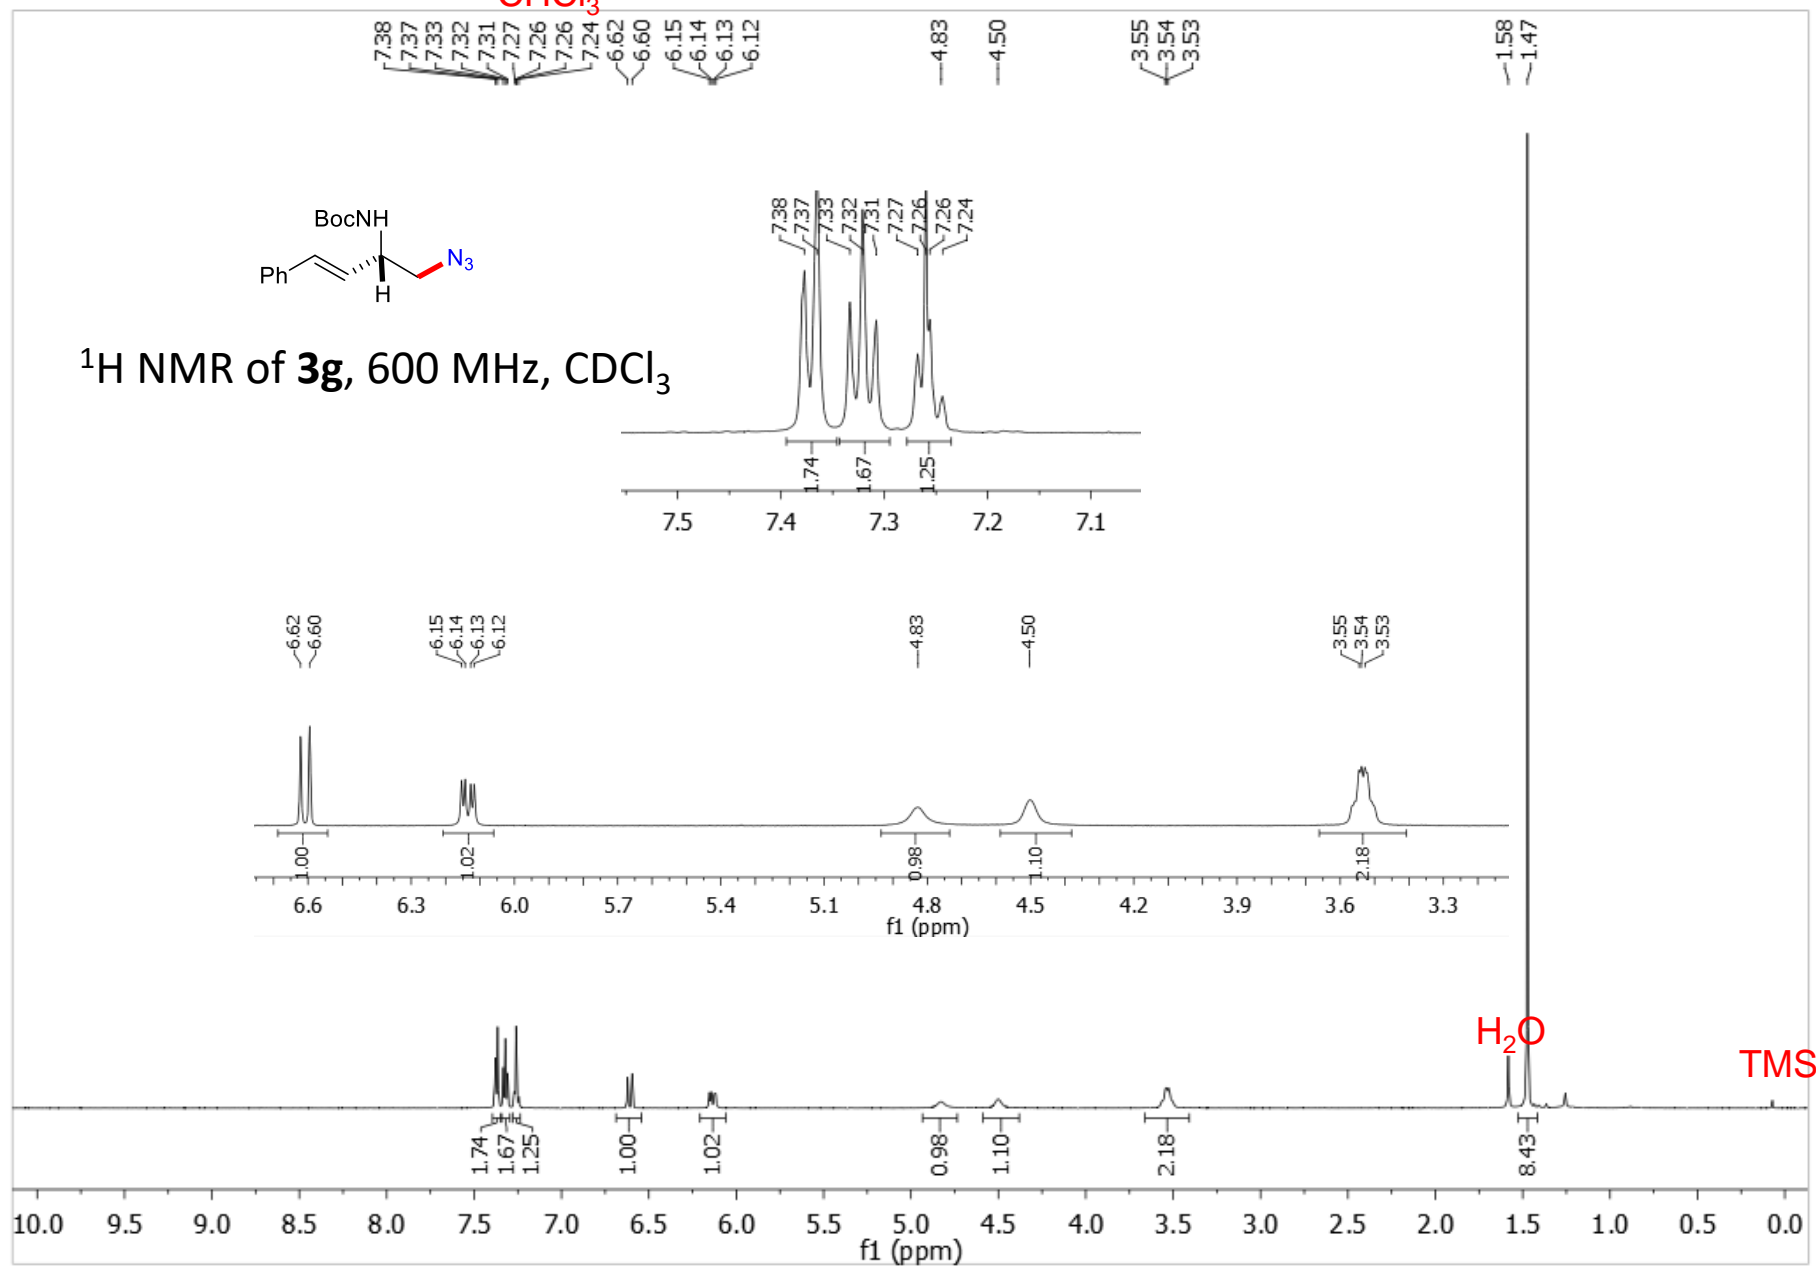

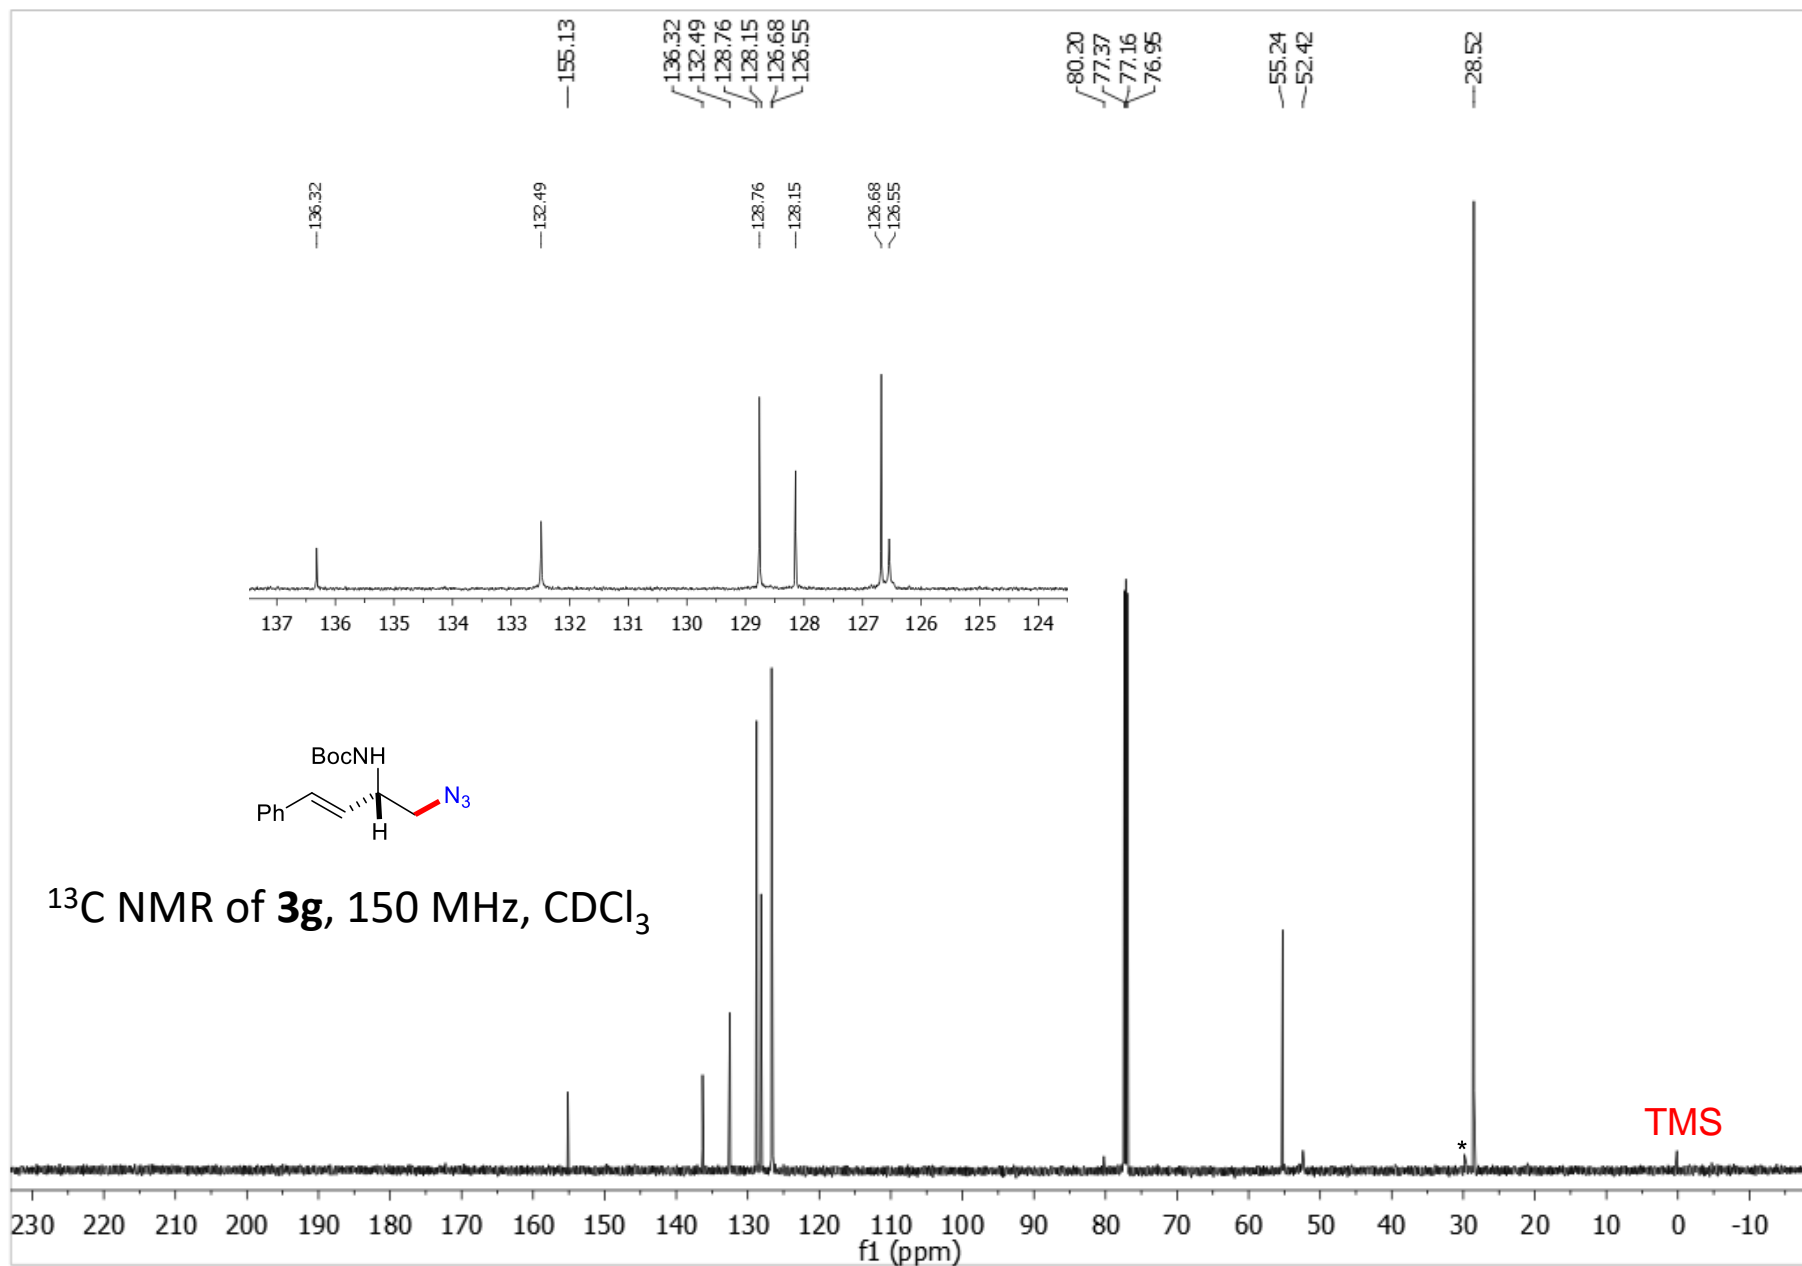

K0L-426-ADH-5%-1.0-2

C:\EZStart\Projects\Default\Data\K0L-426-ADH-5%-1.0-2

C:\EZStart\Projects\Default\Method\SMG-OJ-H-20%1ml-report.met

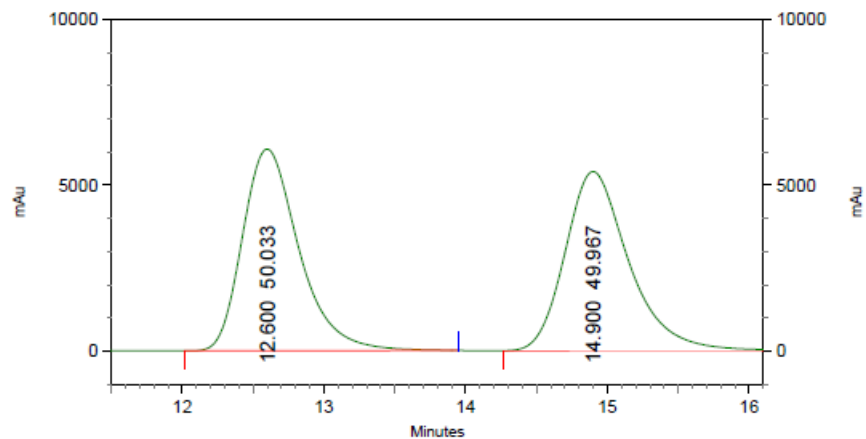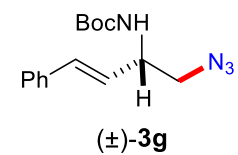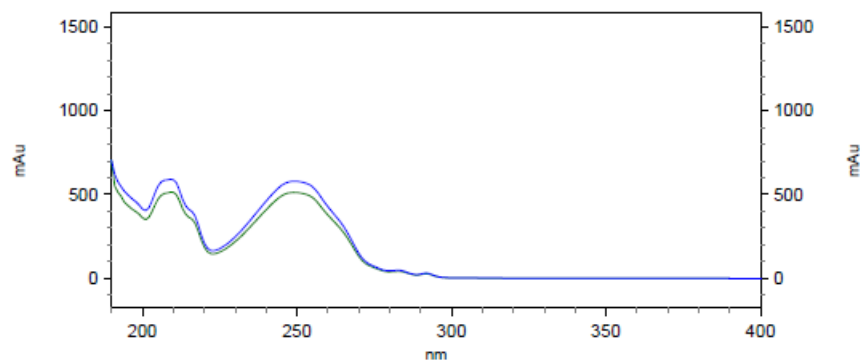

1: 261 nm, 4

nm Results

| Pk # | Retention Time | Area Percent |
|------|----------------|--------------|
| 1    | 12.600         | 50.033       |
| 2    | 14.900         | 49.967       |

|        |         |
|--------|---------|
| Totals | 100.000 |
|--------|---------|

K0L-416-ADH-5%-1.0  
C:\EZStart\Projects\Default\Data\K0L-416-ADH-5%-1.0  
C:\EZStart\Projects\Default\Method\SMG-OJ-H-20%1ml-report.met

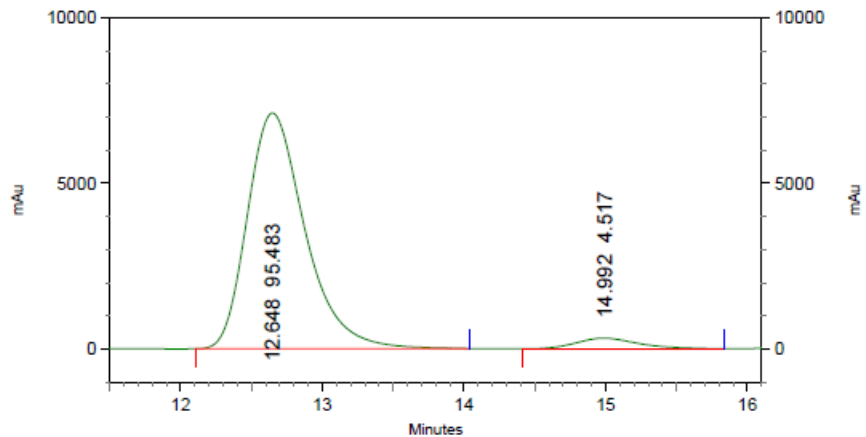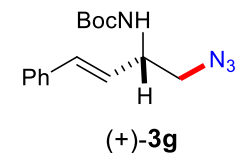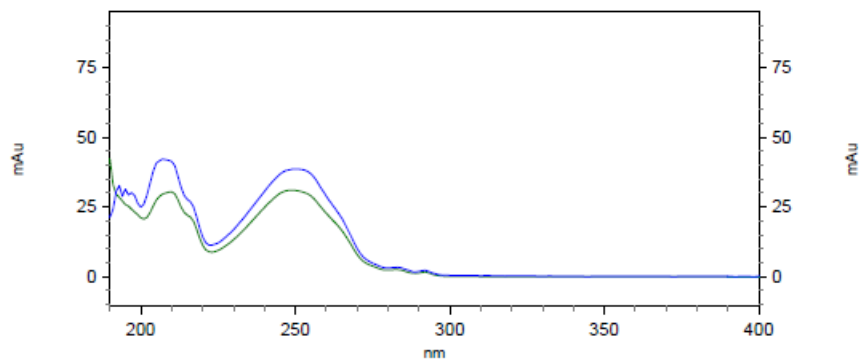

1: 261 nm, 4  
nm Results

| Pk #   | Retention Time | Area Percent |
|--------|----------------|--------------|
| 1      | 12.648         | 95.483       |
| 2      | 14.992         | 4.517        |
| Totals |                | 100.000      |



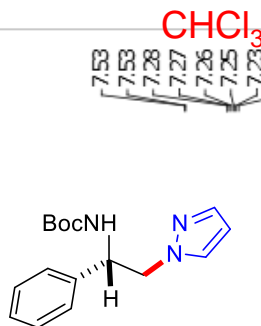

<sup>1</sup>H NMR of **3h**, 500 MHz, CDCl<sub>3</sub>

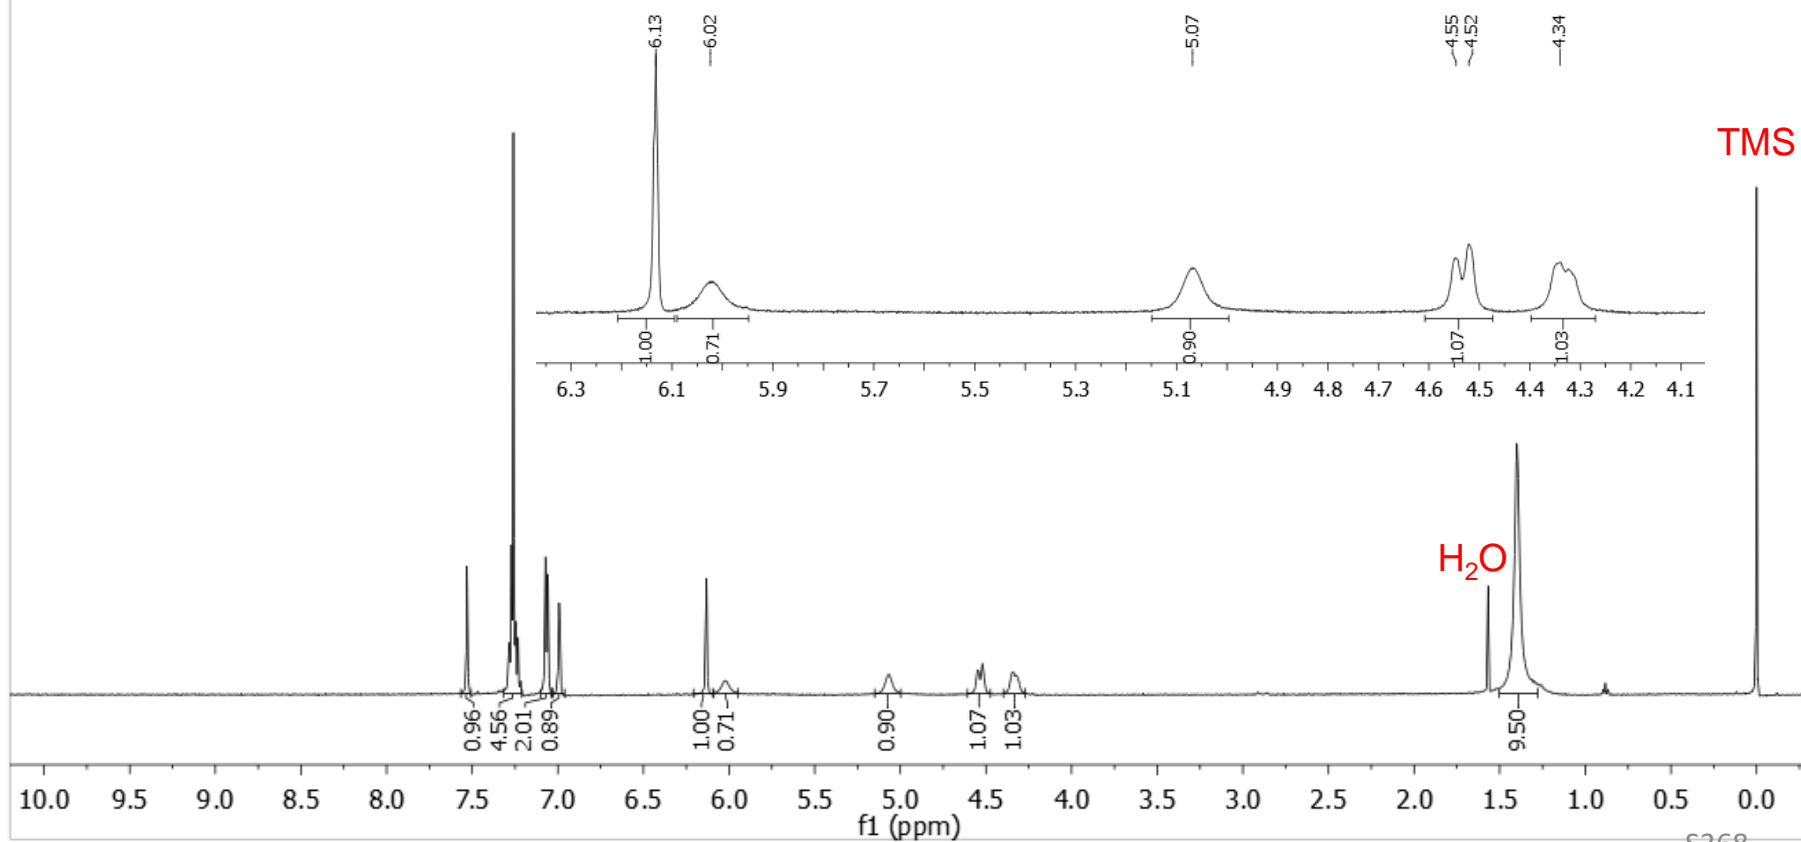

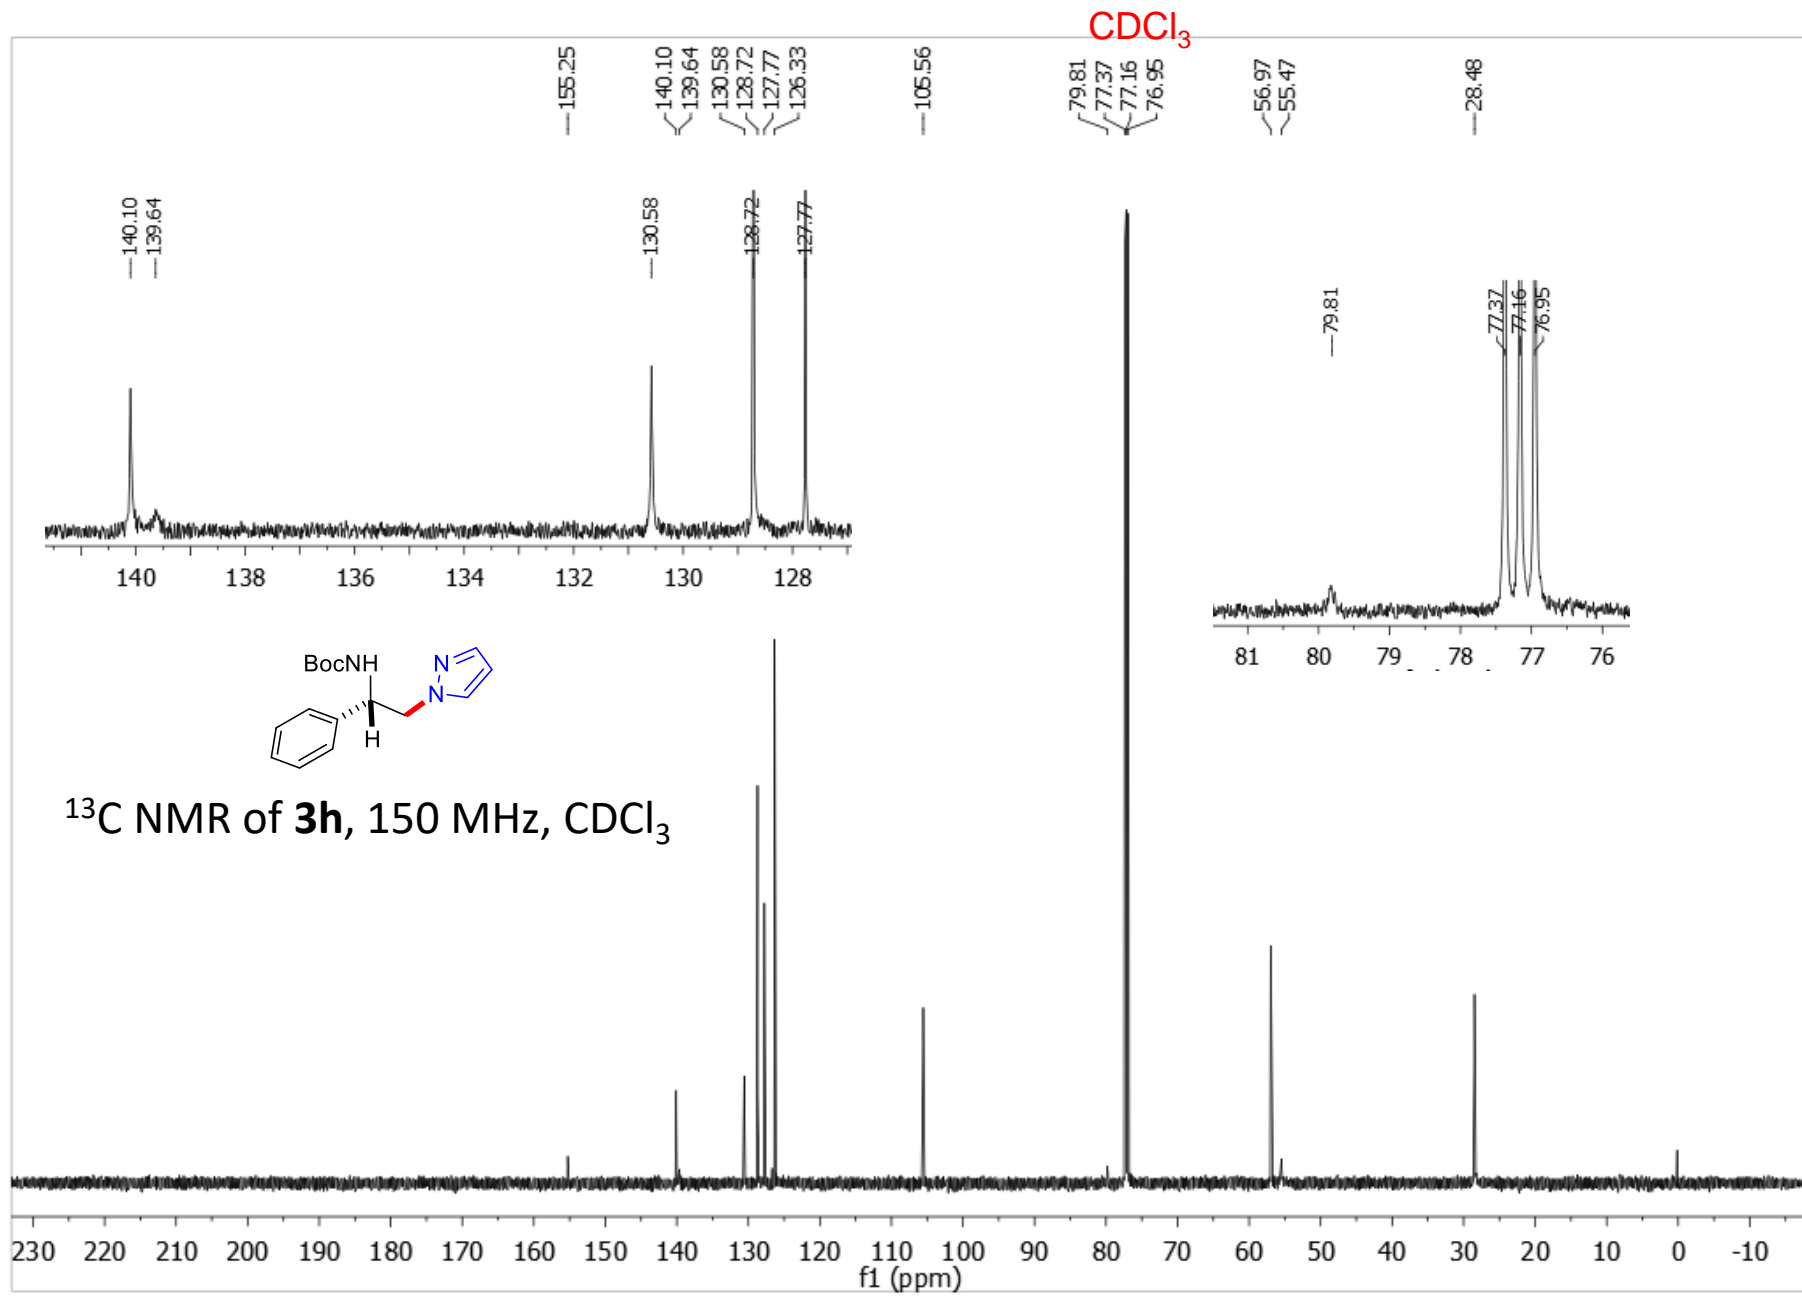

C:\EZStart\Projects\Default\Data\K0L-407-IC-10-1mL  
 C:\Documents and Settings\zhang\Desktop\DSW\04042018.met

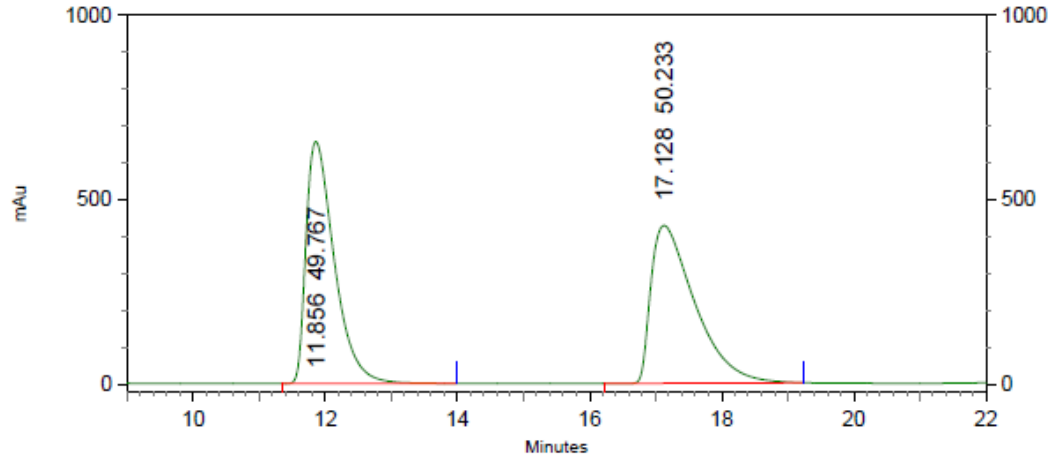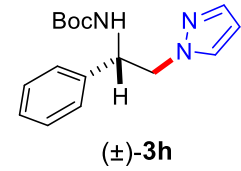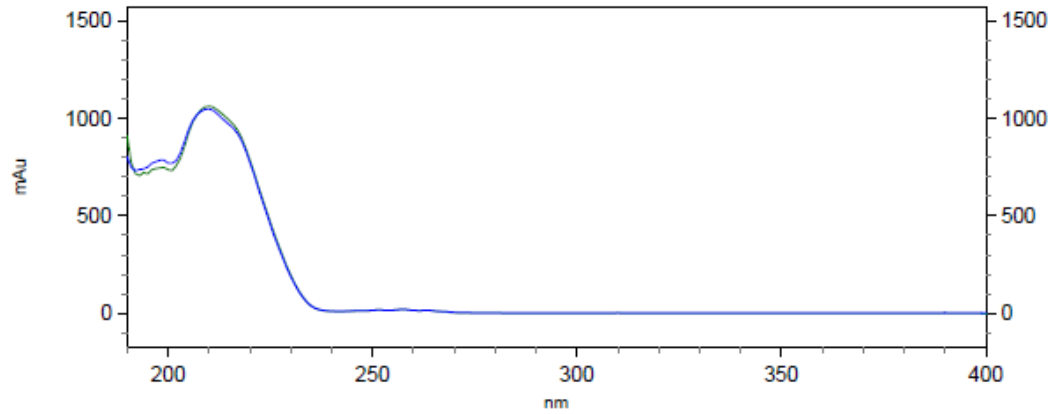

4: 222 nm, 4  
 nm Results

| Pk # | Retention Time | Area Percent |
|------|----------------|--------------|
| 1    | 11.856         | 49.767       |
| 2    | 17.128         | 50.233       |

|        |  |         |
|--------|--|---------|
| Totals |  | 100.000 |
|--------|--|---------|

C:\EZStart\Projects\Default\Data\K0L-406-IC-10%-1mL  
C:\Documents and Settings\zhang\Desktop\DSW\04042018.met

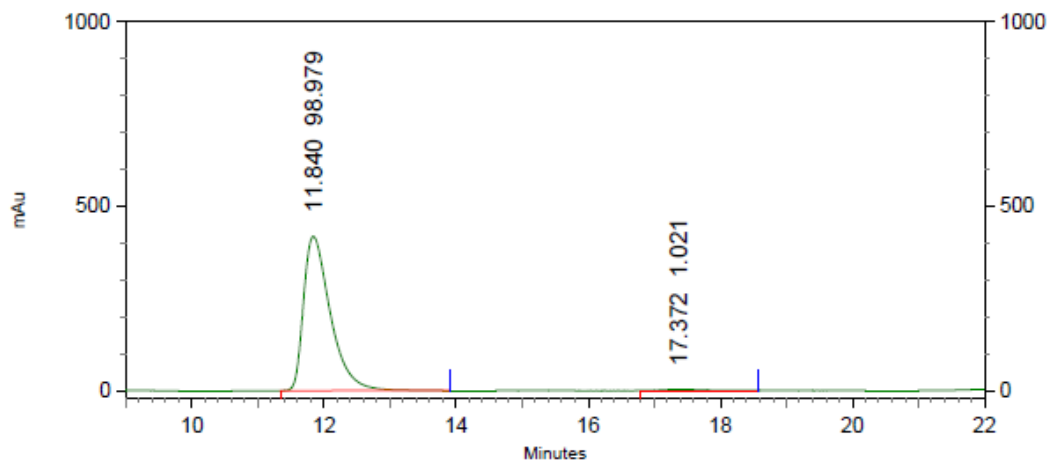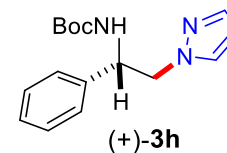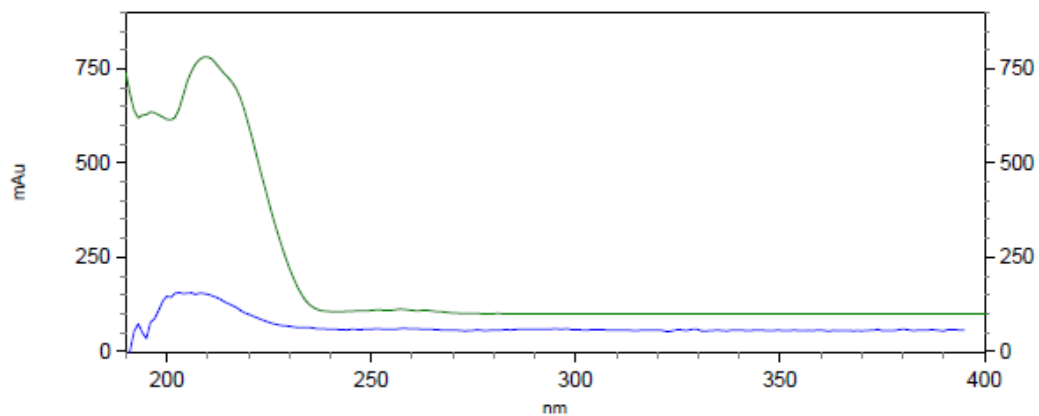

4: 222 nm, 4  
nm Results

| Pk #   | Retention Time | Area Percent |
|--------|----------------|--------------|
| 1      | 11.840         | 98.979       |
| 2      | 17.372         | 1.021        |
| Totals |                | 100.000      |

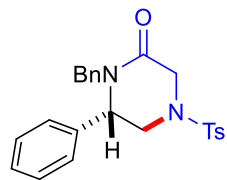

$^1\text{H}$  NMR of **3i**,  
600 MHz,  $\text{CDCl}_3$

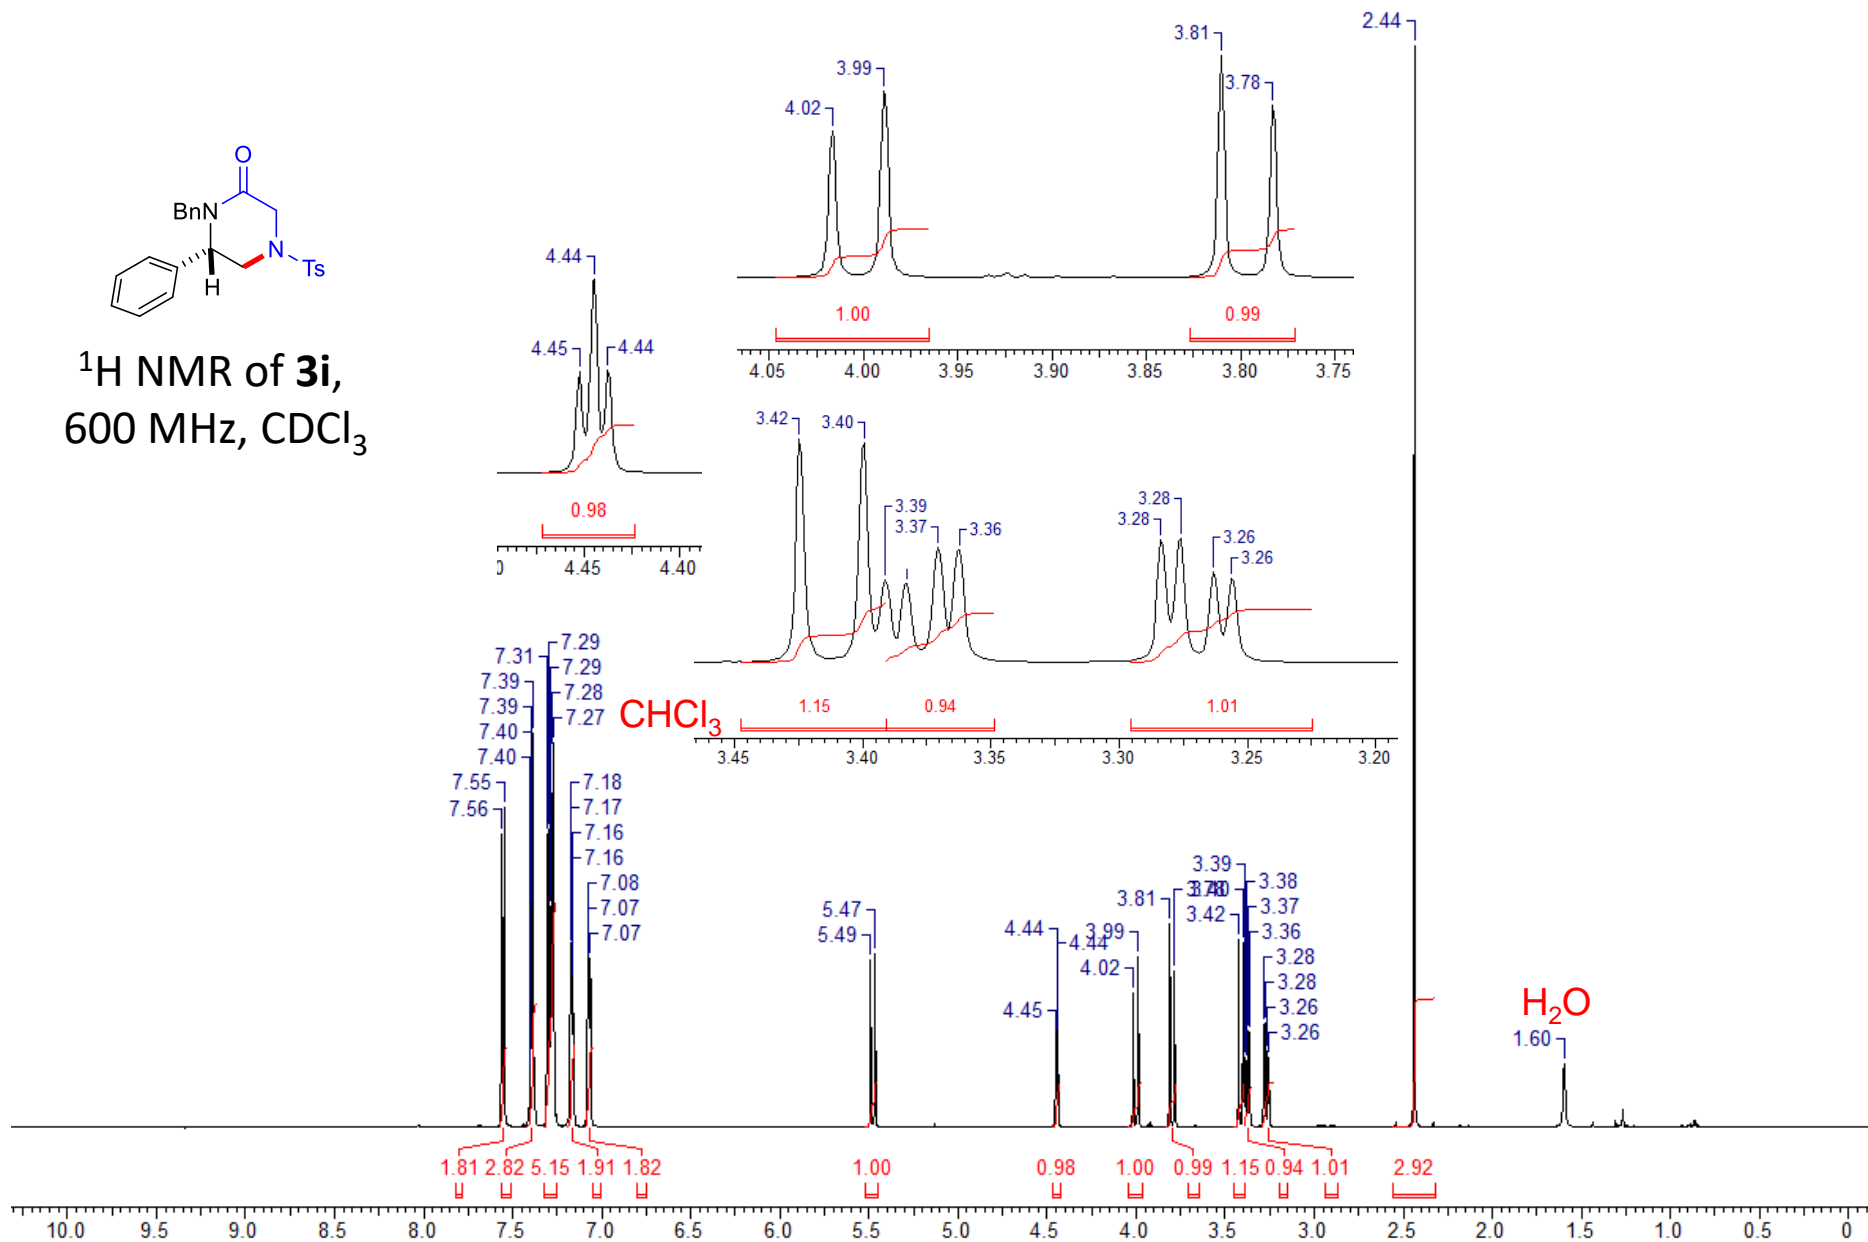

$\text{CDCl}_3$

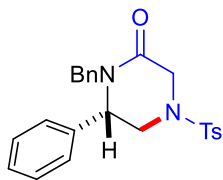

$^{13}\text{C}$  NMR of **3i**,  
150 MHz,  $\text{CDCl}_3$

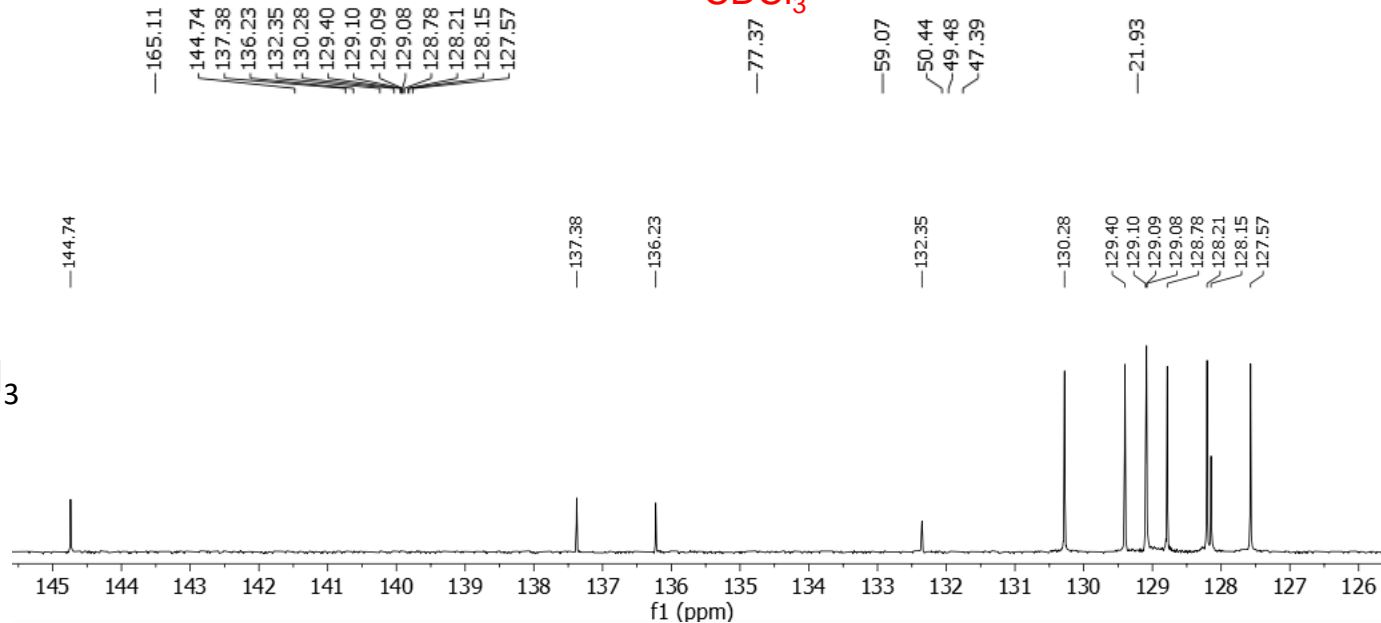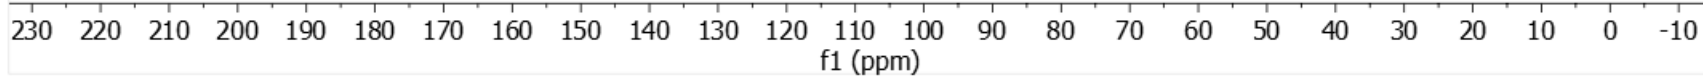

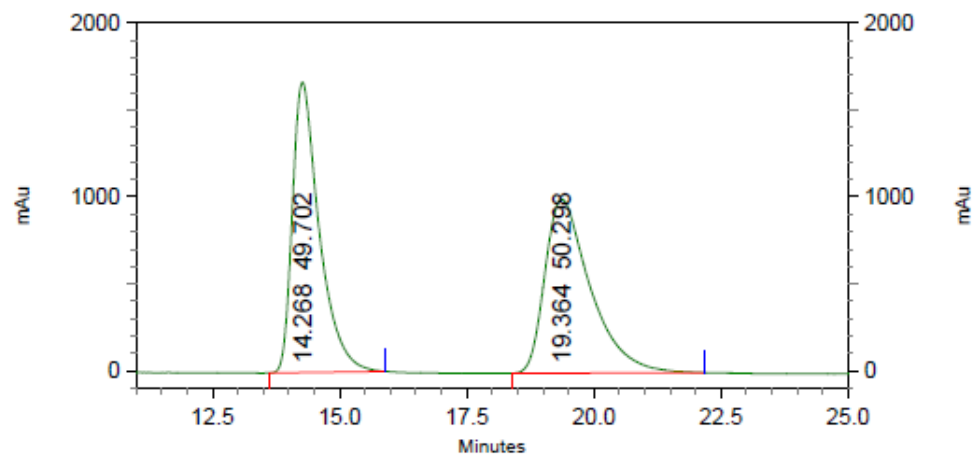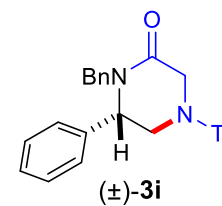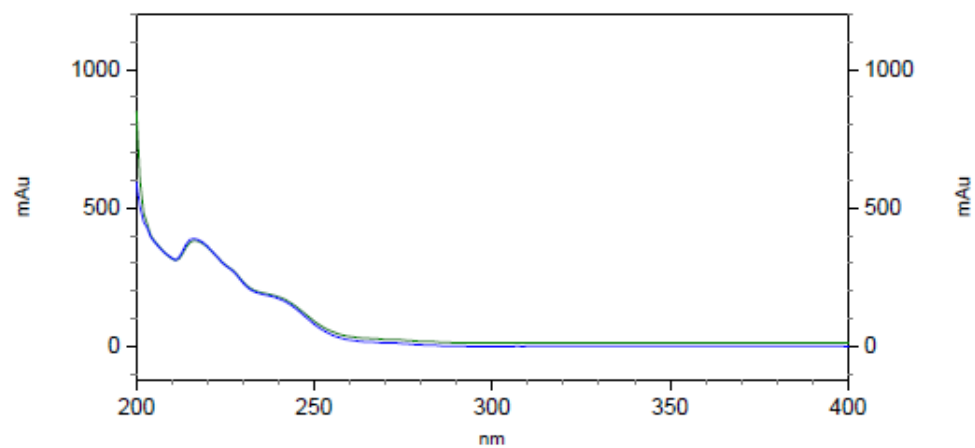

5: 205 nm, 4 nm

Results

| Name | Retention Time | Area Percent | Pk # |
|------|----------------|--------------|------|
|      | 14.268         | 49.702       | 1    |
|      | 19.364         | 50.298       | 2    |

|        |  |         |  |
|--------|--|---------|--|
| Totals |  | 100.000 |  |
|--------|--|---------|--|

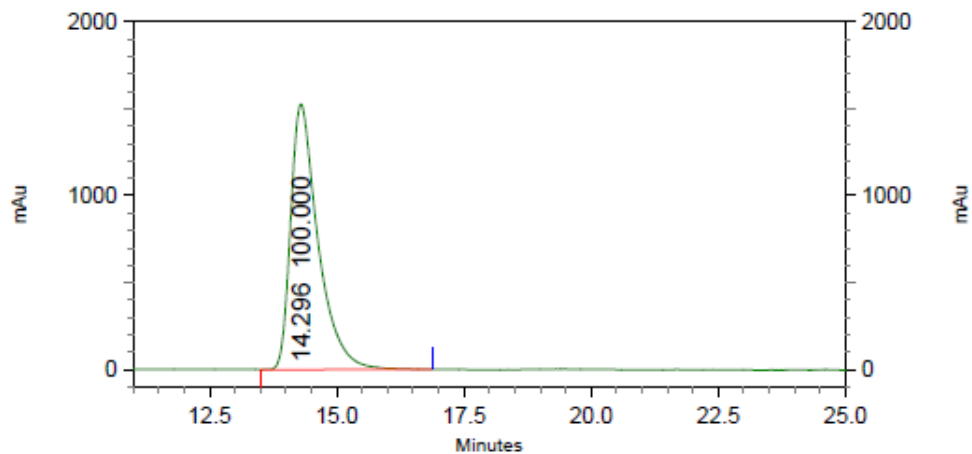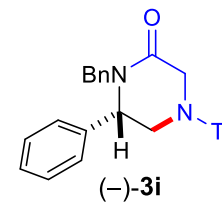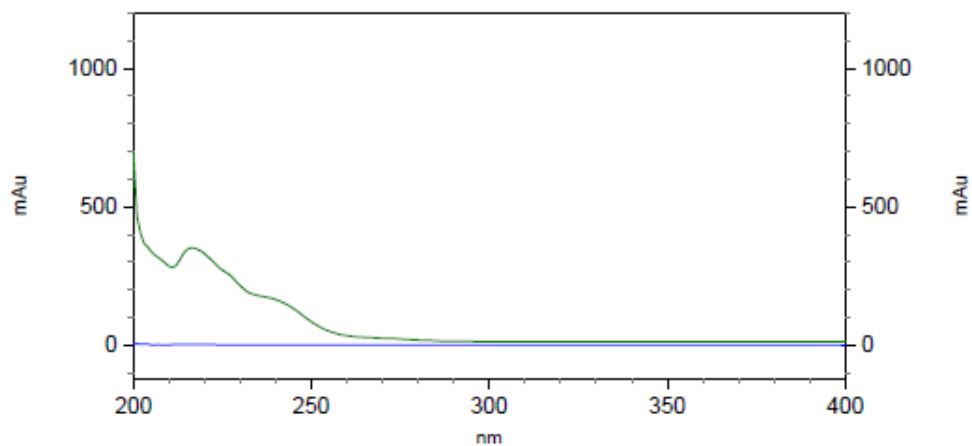

5: 205 nm, 4 nm

Results

| Name | Retention Time | Area Percent | Pk # |
|------|----------------|--------------|------|
|      | 14.296         | 100.000      | 1    |

|        |  |         |  |
|--------|--|---------|--|
| Totals |  | 100.000 |  |
|--------|--|---------|--|



## checkCIF/PLATON report

Structure factors have been supplied for datablock(s) C24H24N2O3S

THIS REPORT IS FOR GUIDANCE ONLY. IF USED AS PART OF A REVIEW PROCEDURE FOR PUBLICATION, IT SHOULD NOT REPLACE THE EXPERTISE OF AN EXPERIENCED CRYSTALLOGRAPHIC REFEREE.

No syntax errors found. [CIF dictionary](#) [Interpreting this report](#)

### Datablock: C24H24N2O3S

---

Bond precision: C-C = 0.0030 Å Wavelength=1.54178

Cell: a=9.0355(12) b=10.0246(14) c=11.7191(16)  
alpha=90 beta=97.020(4) gamma=90  
Temperature: 173 K

|                        | Calculated      | Reported        |
|------------------------|-----------------|-----------------|
| Volume                 | 1053.5(2)       | 1053.5(2)       |
| Space group            | P 21            | P 21            |
| Hall group             | P 2yb           | P 2yb           |
| Moiety formula         | C24 H24 N2 O3 S | C24 H24 N2 O3 S |
| Sum formula            | C24 H24 N2 O3 S | C24 H24 N2 O3 S |
| Mr                     | 420.51          | 420.51          |
| Dx, g cm <sup>-3</sup> | 1.326           | 1.326           |
| Z                      | 2               | 2               |
| Mu (mm <sup>-1</sup> ) | 1.595           | 1.595           |
| F000                   | 444.0           | 444.0           |
| F000'                  | 445.89          |                 |
| h,k,lmax               | 10,11,13        | 10,11,13        |
| Nref                   | 3724 [ 1978]    | 3597            |
| Tmin,Tmax              | 0.663,0.787     | 0.619,0.753     |
| Tmin'                  | 0.519           |                 |

Correction method= # Reported T Limits: Tmin=0.619 Tmax=0.753  
AbsCorr = MULTI-SCAN

Data completeness= 1.82/0.97 Theta(max)= 66.661

R(reflections)= 0.0228( 3583) wR2(reflections)= 0.0654( 3597)

S = 1.067 Npar= 273

---

The following ALERTS were generated. Each ALERT has the format  
**test-name\_ALERT\_alert-type\_alert-level.**  
Click on the hyperlinks for more details of the test.

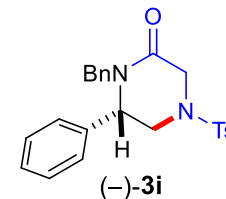

### Alert level C

|                   |                                                  |            |
|-------------------|--------------------------------------------------|------------|
| PLAT029 ALERT 3 C | _diffn_measured_fraction_theta_full value Low .  | 0.975 Why? |
| PLAT089 ALERT 3 C | Poor Data / Parameter Ratio (Zmax < 18) .....    | 7.07 Note  |
| PLAT911 ALERT 3 C | Missing FCF Refl Between Thmin & STh/L= 0.596    | 48 Report  |
| PLAT913 ALERT 3 C | Missing # of Very Strong Reflections in FCF .... | 12 Note    |

### Alert level G

|                   |                                                  |              |
|-------------------|--------------------------------------------------|--------------|
| PLAT791 ALERT 4 G | Model has Chirality at C4 (Sohnke SpGr)          | 8 Verify     |
| PLAT909 ALERT 3 G | Percentage of I>2sig(I) Data at Theta(Max) Still | 99% Note     |
| PLAT910 ALERT 3 G | Missing # of FCF Reflection(s) Below Theta(Min). | 1 Note       |
| PLAT965 ALERT 2 G | The SHELXL WEIGHT Optimisation has not Converged | Please Check |
| PLAT978 ALERT 2 G | Number C-C Bonds with Positive Residual Density. | 8 Info       |

0 ALERT level A = Most likely a serious problem - resolve or explain  
0 ALERT level B = A potentially serious problem, consider carefully  
4 ALERT level C = Check. Ensure it is not caused by an omission or oversight  
5 ALERT level G = General information/check it is not something unexpected

0 ALERT type 1 CIF construction/syntax error, inconsistent or missing data  
2 ALERT type 2 Indicator that the structure model may be wrong or deficient  
6 ALERT type 3 Indicator that the structure quality may be low  
1 ALERT type 4 Improvement, methodology, query or suggestion  
0 ALERT type 5 Informative message, check

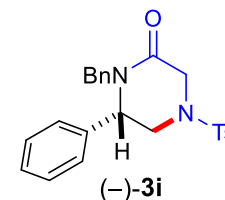

It is advisable to attempt to resolve as many as possible of the alerts in all categories. Often the minor alerts point to easily fixed oversights, errors and omissions in your CIF or refinement strategy, so attention to these fine details can be worthwhile. In order to resolve some of the more serious problems it may be necessary to carry out additional measurements or structure refinements. However, the purpose of your study may justify the reported deviations and the more serious of these should normally be commented upon in the discussion or experimental section of a paper or in the "special\_details" fields of the CIF. checkCIF was carefully designed to identify outliers and unusual parameters, but every test has its limitations and alerts that are not important in a particular case may appear. Conversely, the absence of alerts does not guarantee there are no aspects of the results needing attention. It is up to the individual to critically assess their own results and, if necessary, seek expert advice.

#### Publication of your CIF in IUCr journals

A basic structural check has been run on your CIF. These basic checks will be run on all CIFs submitted for publication in IUCr journals (*Acta Crystallographica*, *Journal of Applied Crystallography*, *Journal of Synchrotron Radiation*); however, if you intend to submit to *Acta Crystallographica Section C* or *E* or *IUCrData*, you should make sure that [full publication checks](#) are run on the final version of your CIF prior to submission.

#### Publication of your CIF in other journals

Please refer to the *Notes for Authors* of the relevant journal for any special instructions relating to CIF submission.

PLATON version of 08/07/2020; check.def file version of 17/06/2020

Datablock C24H24N2O3S - ellipsoid plot

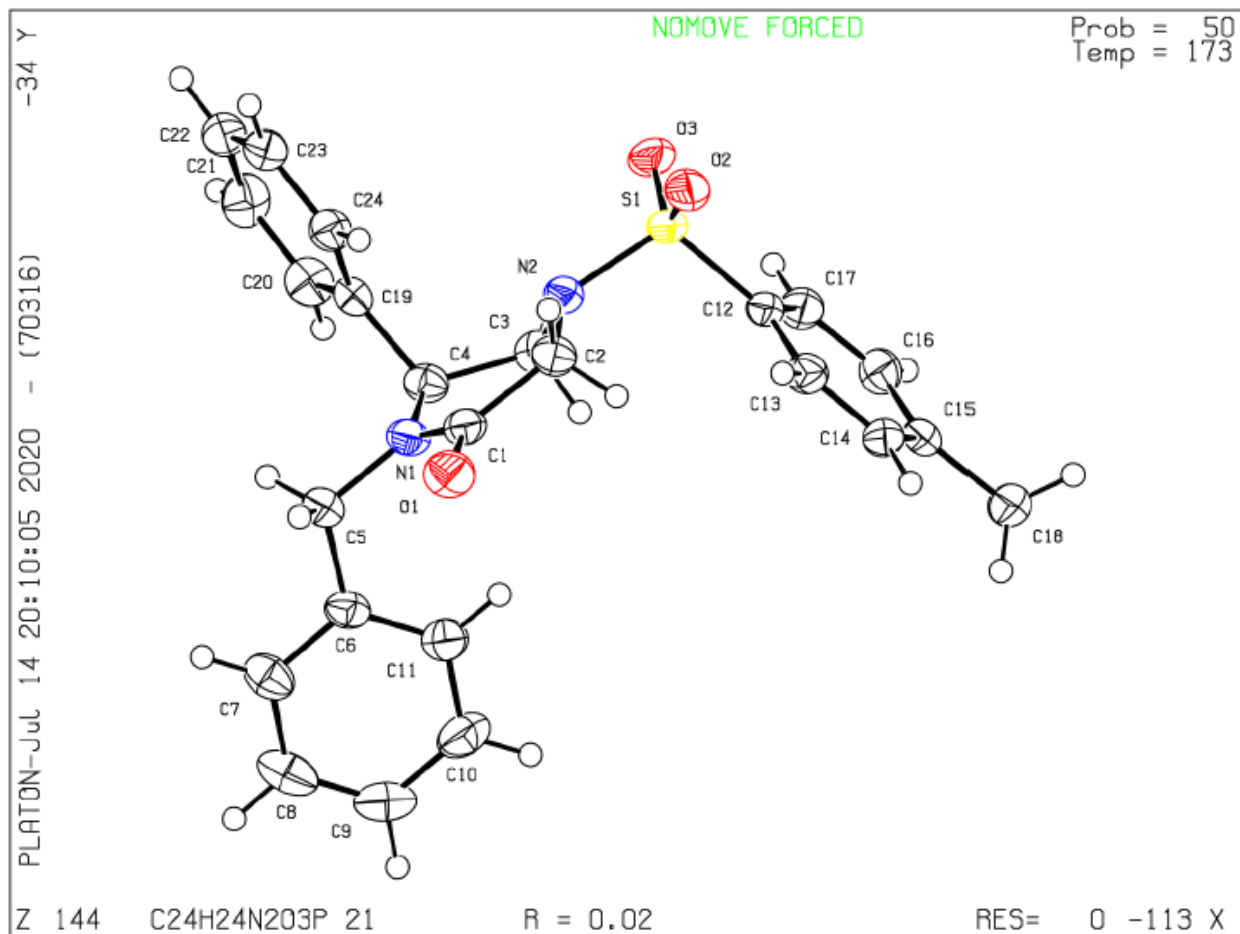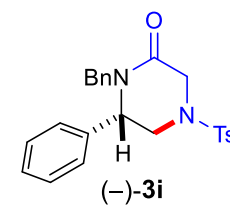

CHCl<sub>3</sub>

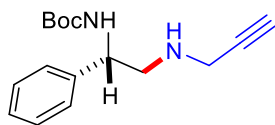

<sup>1</sup>H NMR of **3j**, 600 MHz, CDCl<sub>3</sub>

7.35  
7.34  
7.32  
7.29  
7.28  
7.27  
7.26  
7.25  
7.24  
-5.45  
-4.80  
3.43  
3.42  
3.40  
3.40  
3.37  
3.37  
3.35  
3.34  
3.04  
2.97  
2.96  
2.95  
2.94  
2.20  
2.19  
2.19  
-1.42  
-1.19  
-0.00

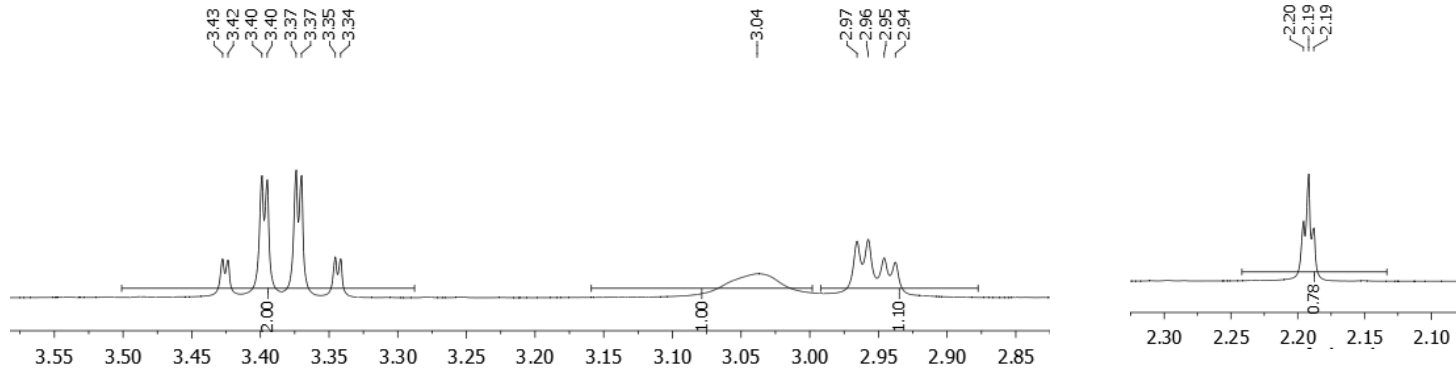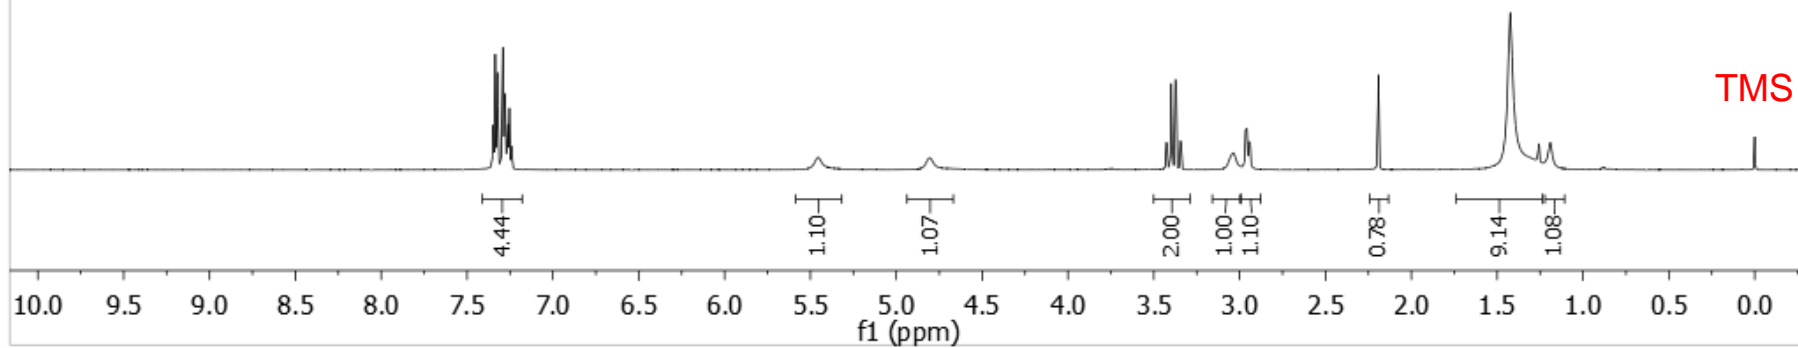

CDCl<sub>3</sub>

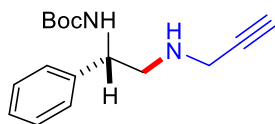

<sup>13</sup>C NMR of **3j**, 150 MHz, CDCl<sub>3</sub>

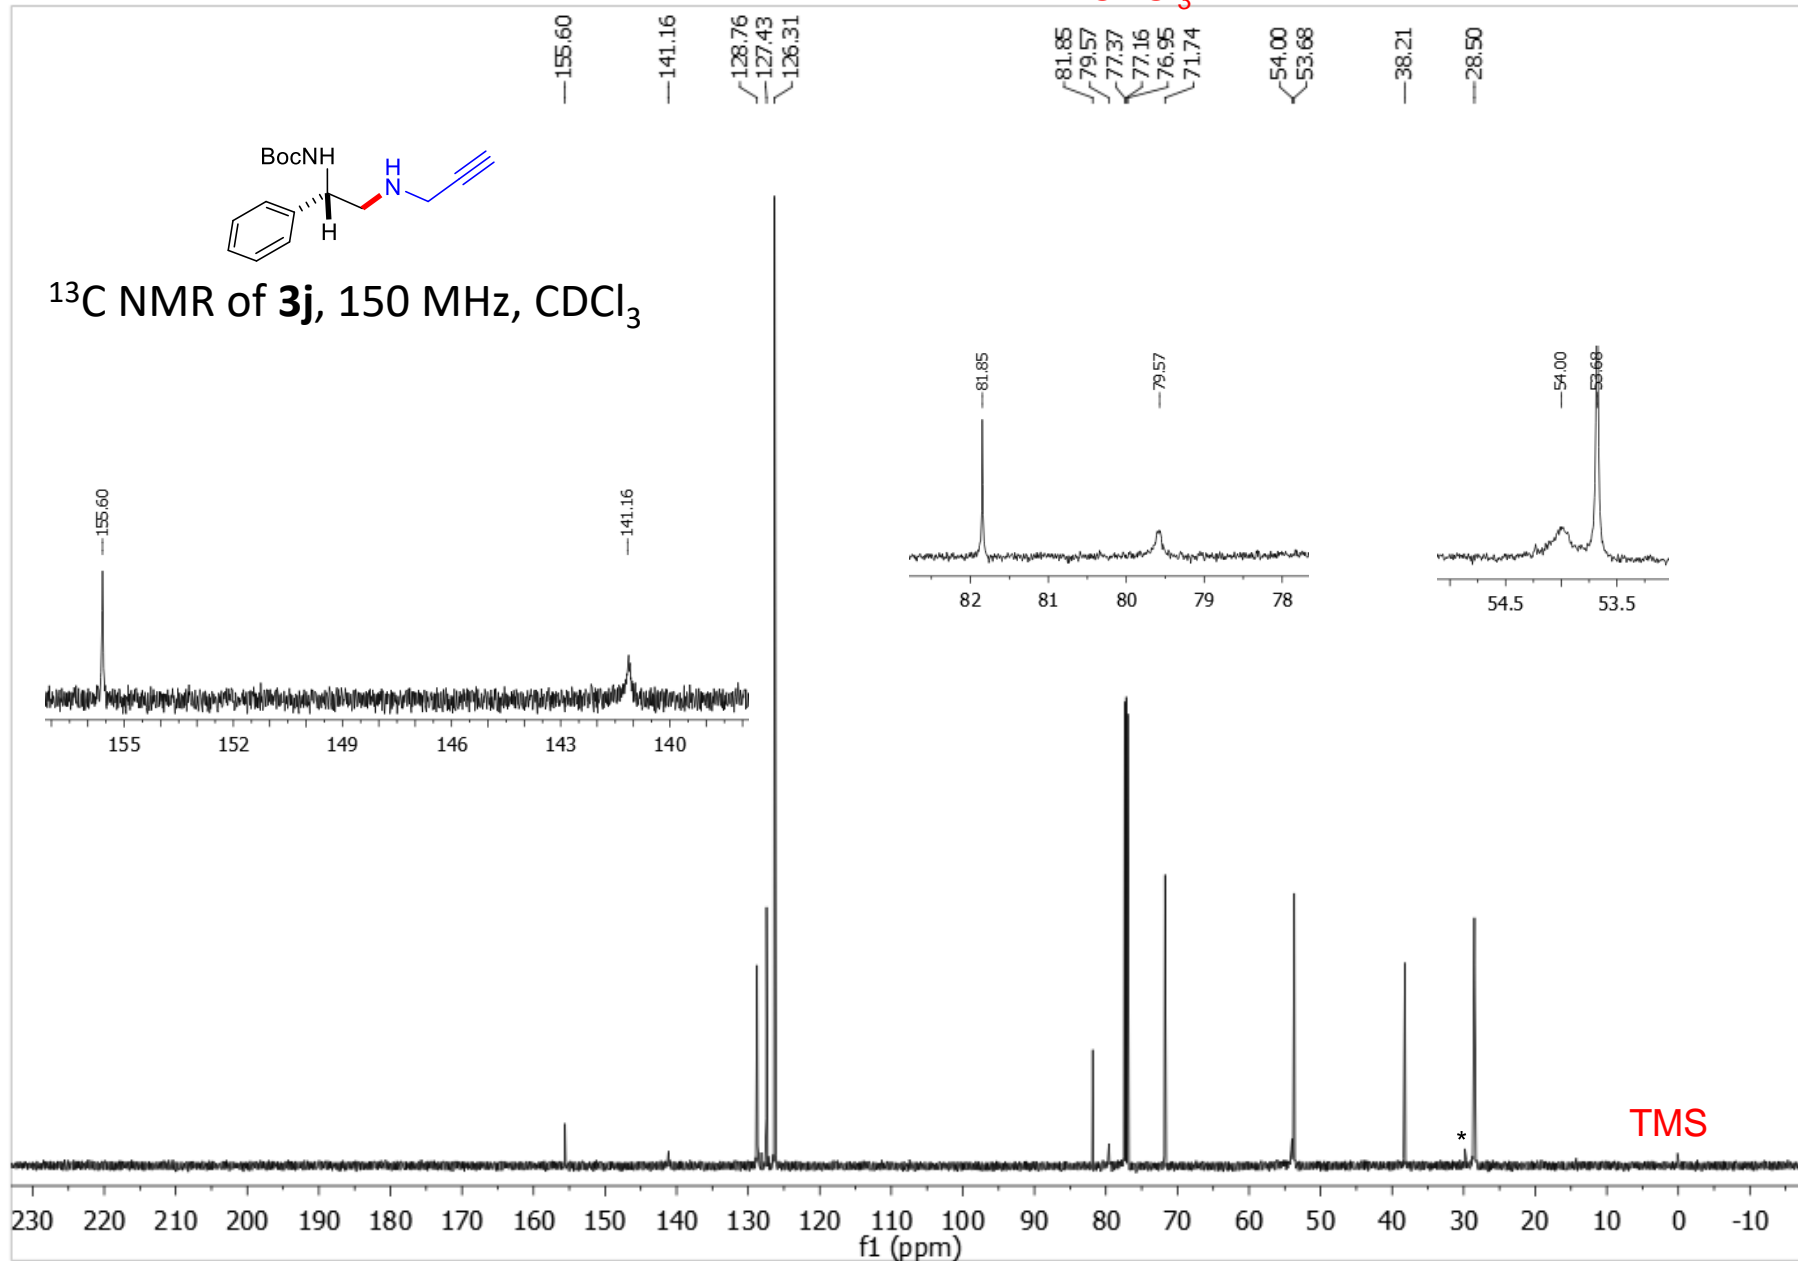

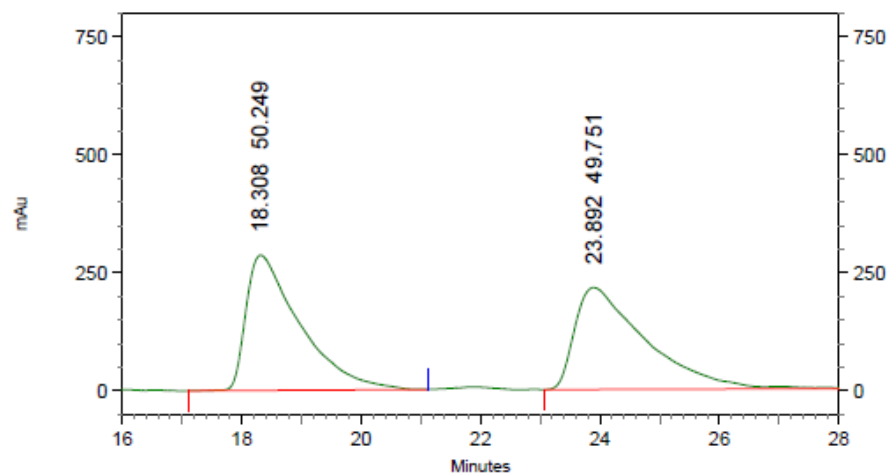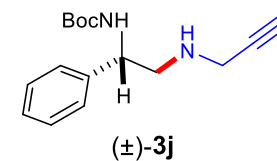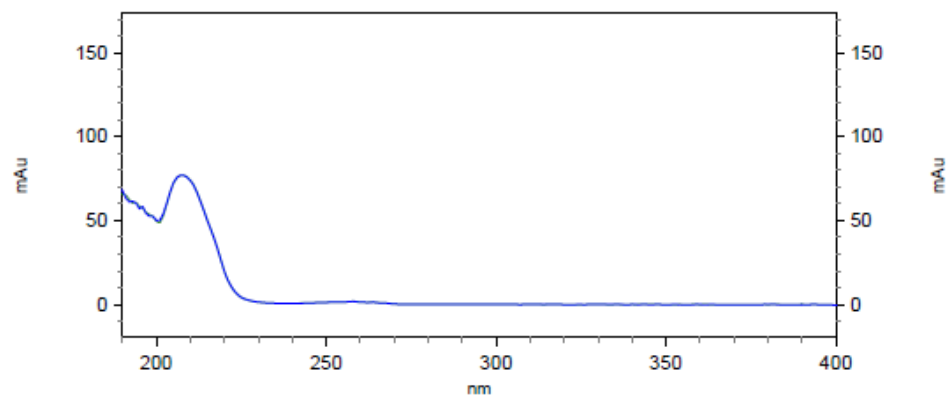

3: 210 nm, 4  
nm Results

| Pk # | Retention Time | Area Percent |
|------|----------------|--------------|
| 1    | 18.308         | 50.249       |
| 2    | 23.892         | 49.751       |

|        |         |
|--------|---------|
| Totals | 100.000 |
|--------|---------|

K0L-427-ADH-5%1.0

C:\EZStart\Projects\Default\Data\K0L-427-ADH-5%1.0

C:\EZStart\Projects\Default\Method\SMG-OJ-H-20%1ml-report.met

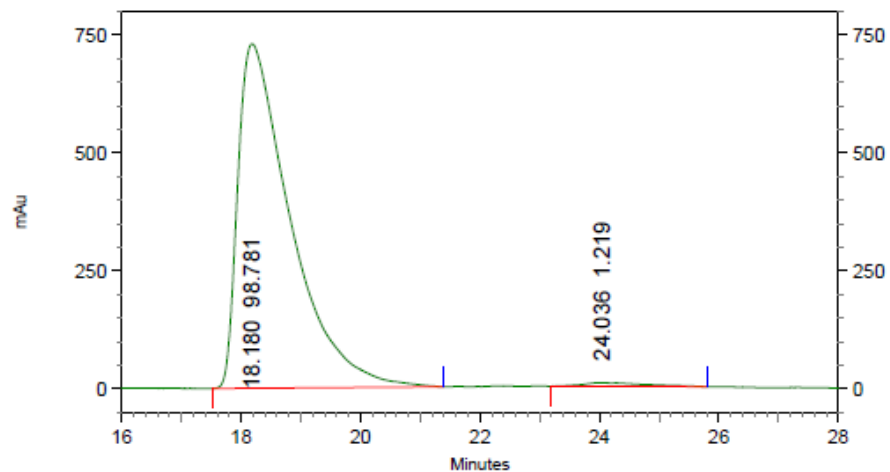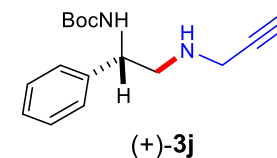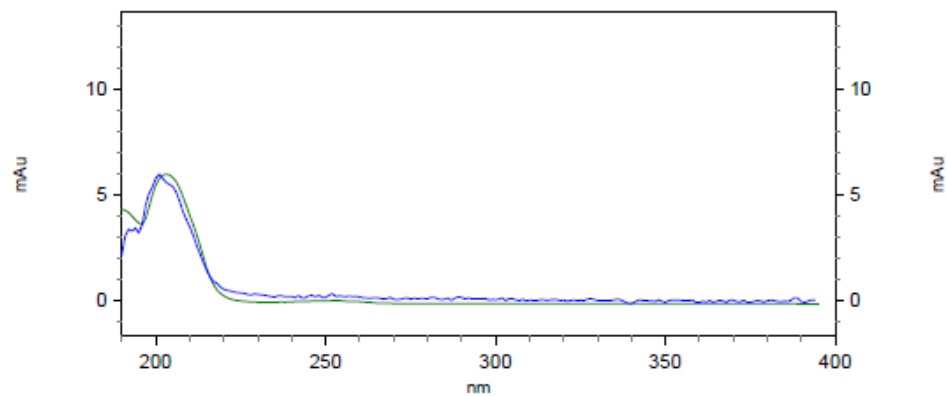

3: 210 nm, 4

nm Results

| Pk # | Retention Time | Area Percent |
|------|----------------|--------------|
| 1    | 18.180         | 98.781       |
| 2    | 24.036         | 1.219        |

|        |         |
|--------|---------|
| Totals | 100.000 |
|--------|---------|

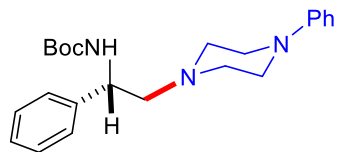

$^1\text{H}$  NMR of **3k**, 600 MHz,  $\text{CDCl}_3$

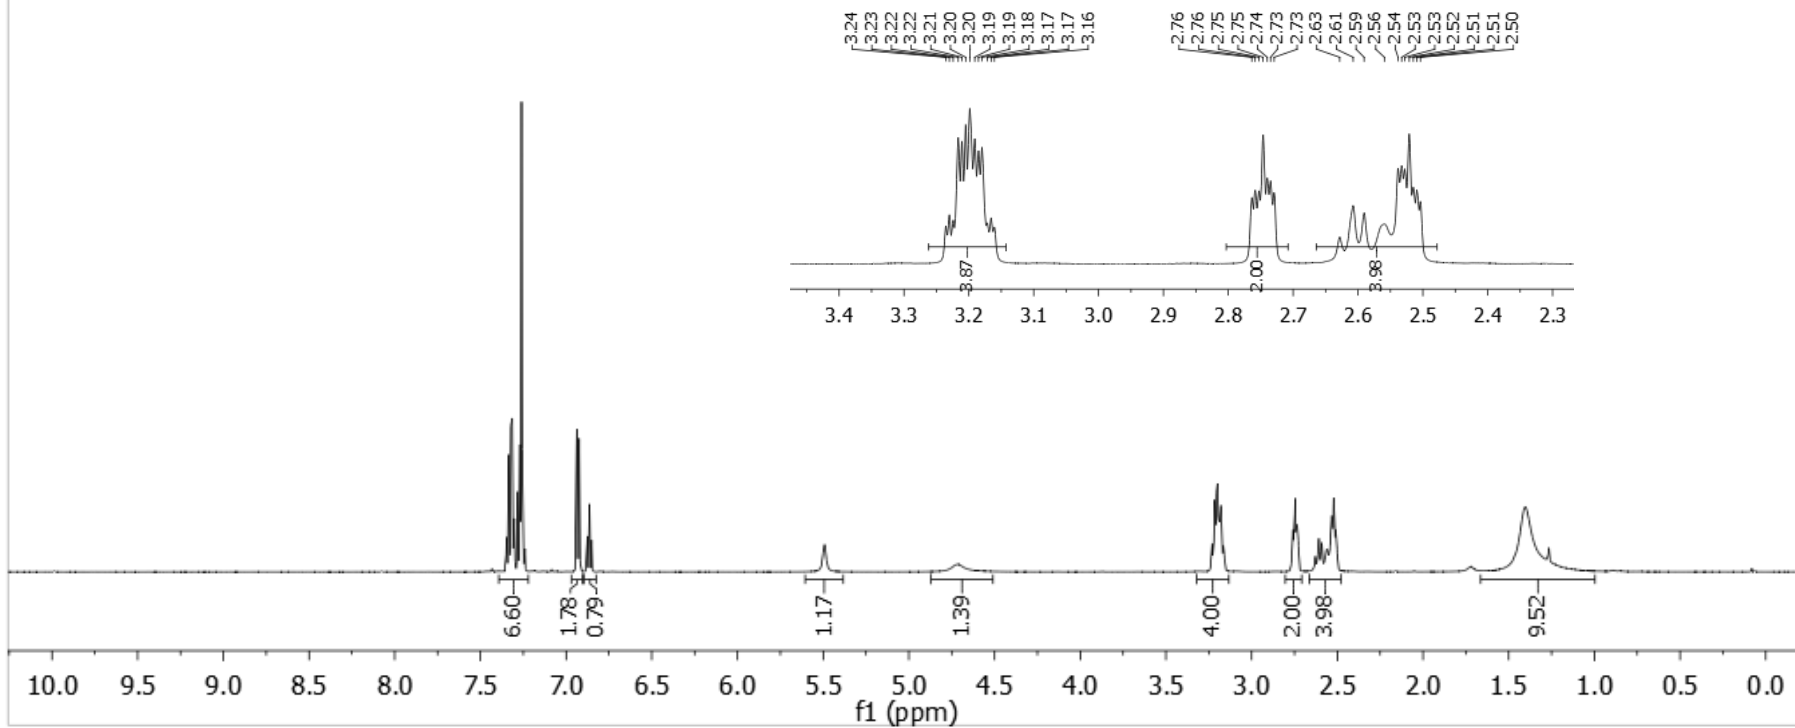



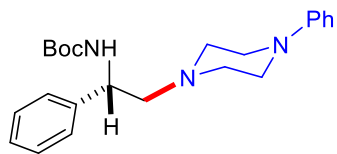

$^{13}\text{C}$  NMR of **3k**, 150 MHz,  $\text{CDCl}_3$

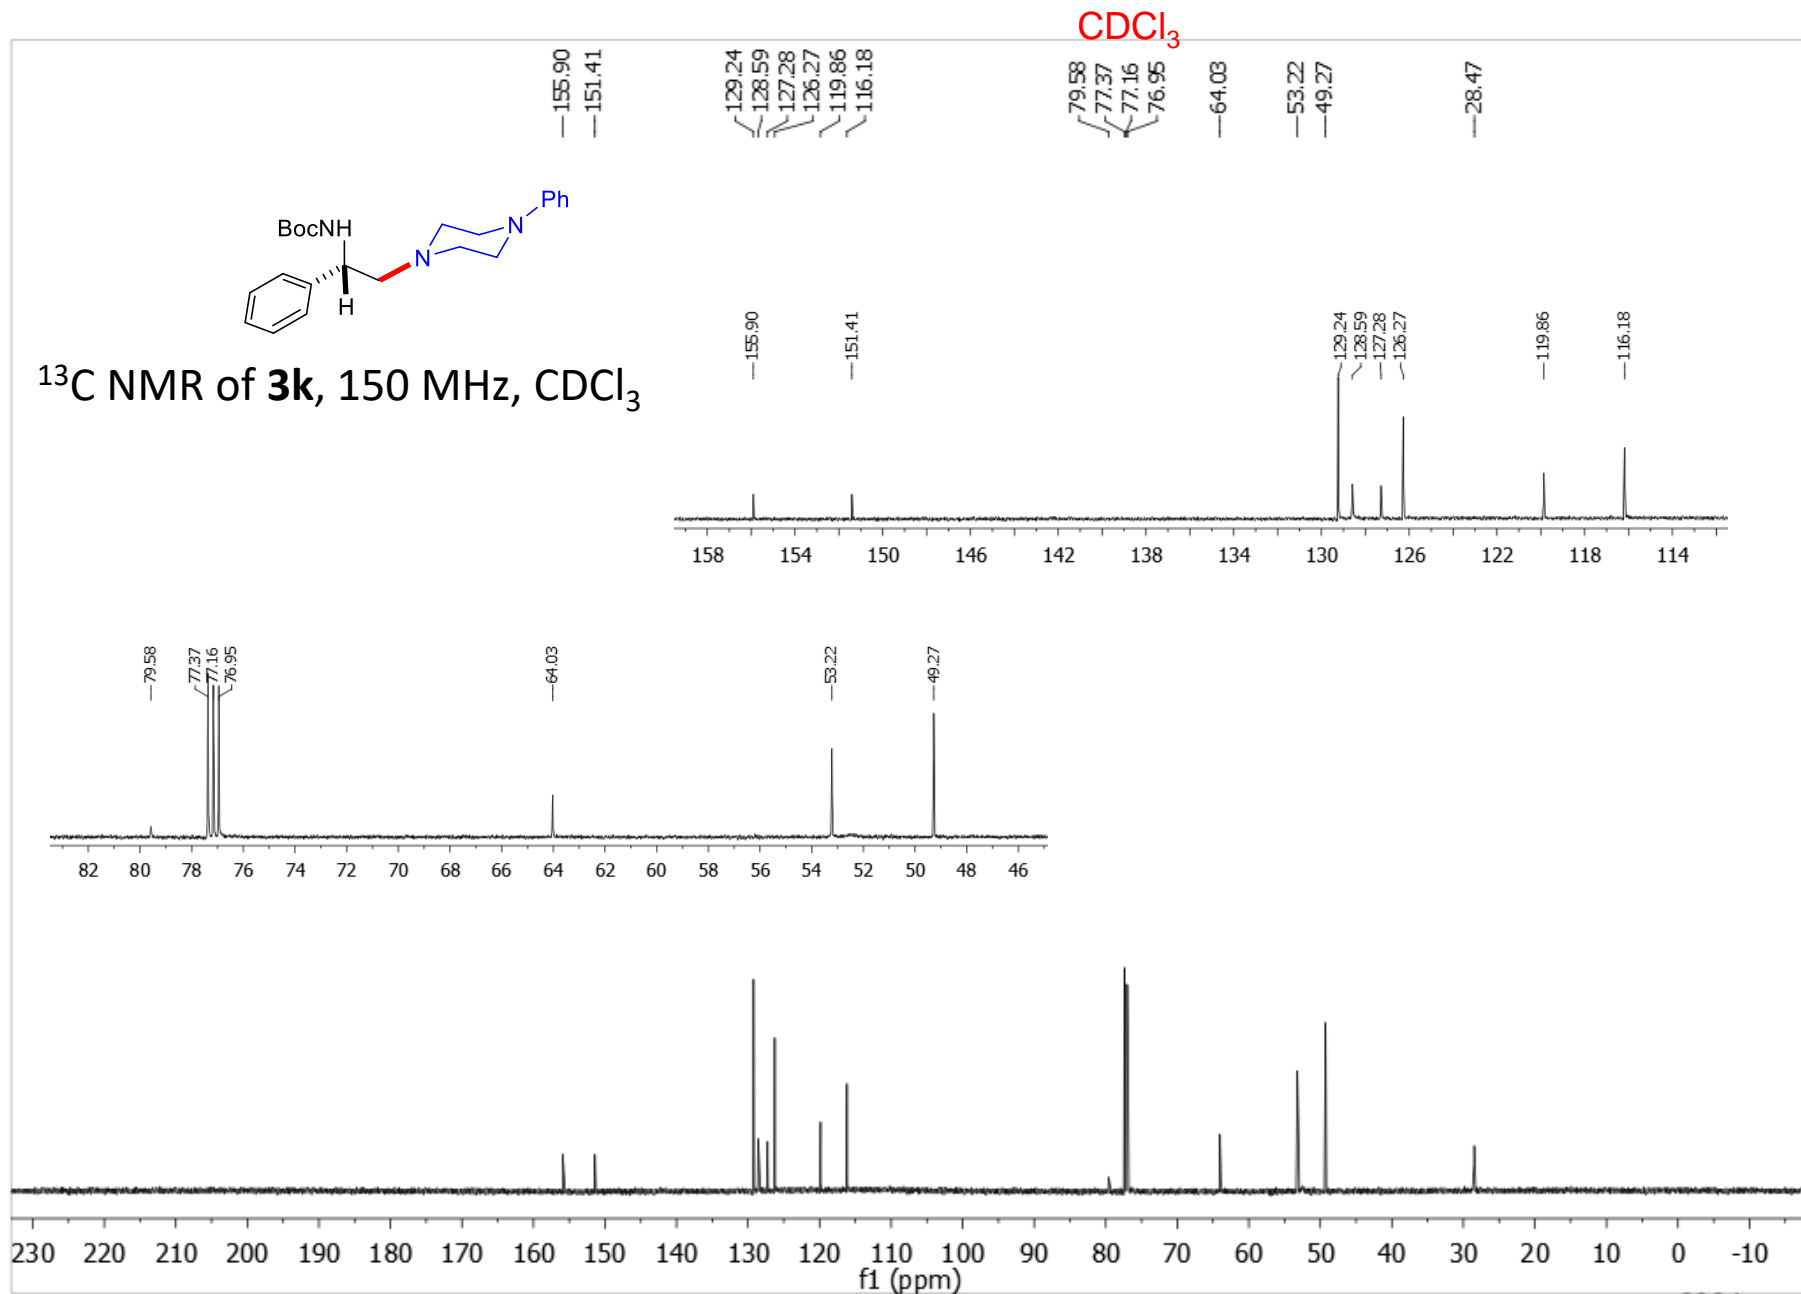

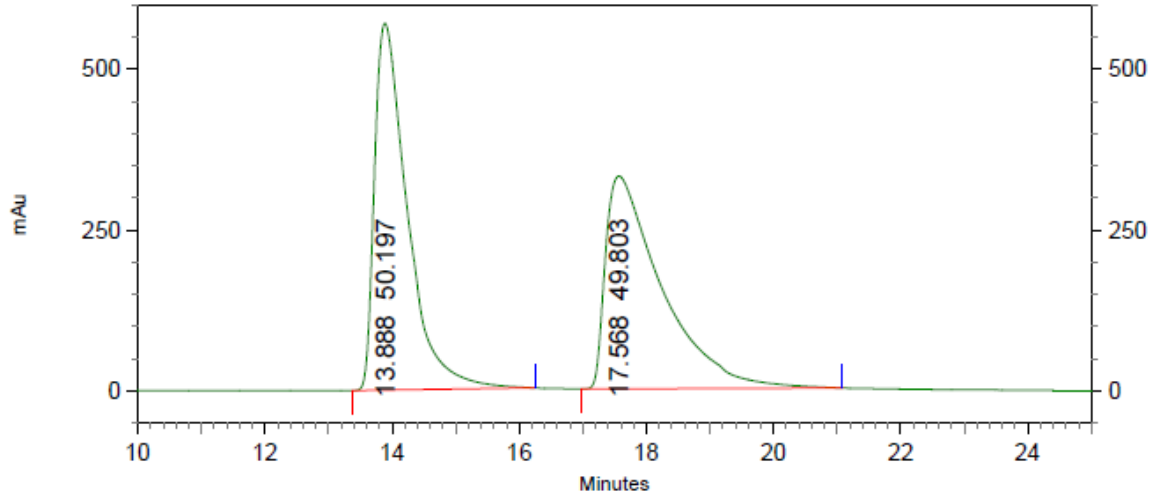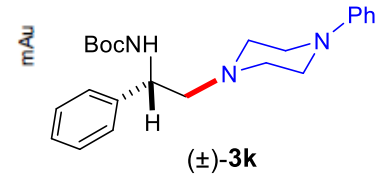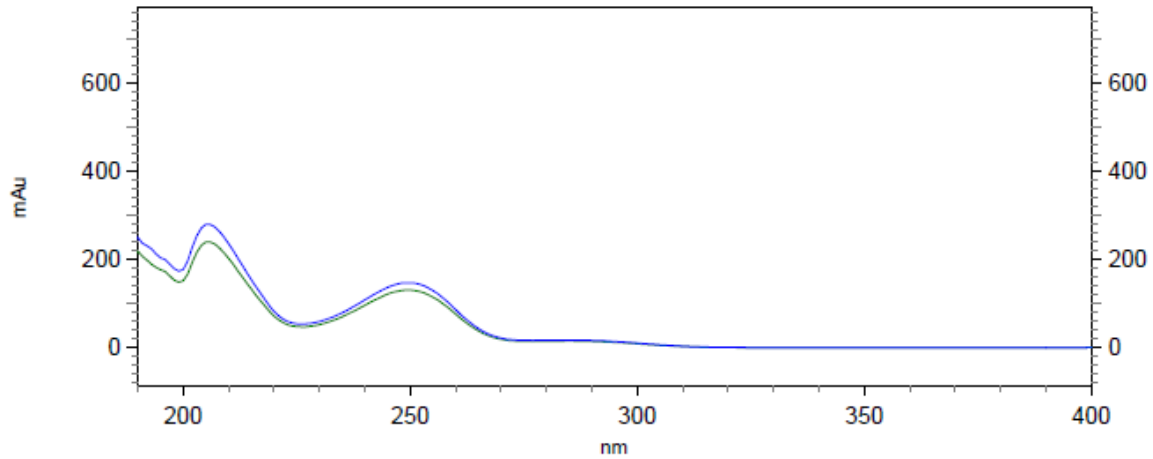

4: 240 nm, 4  
nm Results

| Pk # | Retention Time | Area Percent |
|------|----------------|--------------|
| 1    | 13.888         | 50.197       |
| 2    | 17.568         | 49.803       |

|        |         |
|--------|---------|
| Totals | 100.000 |
|--------|---------|

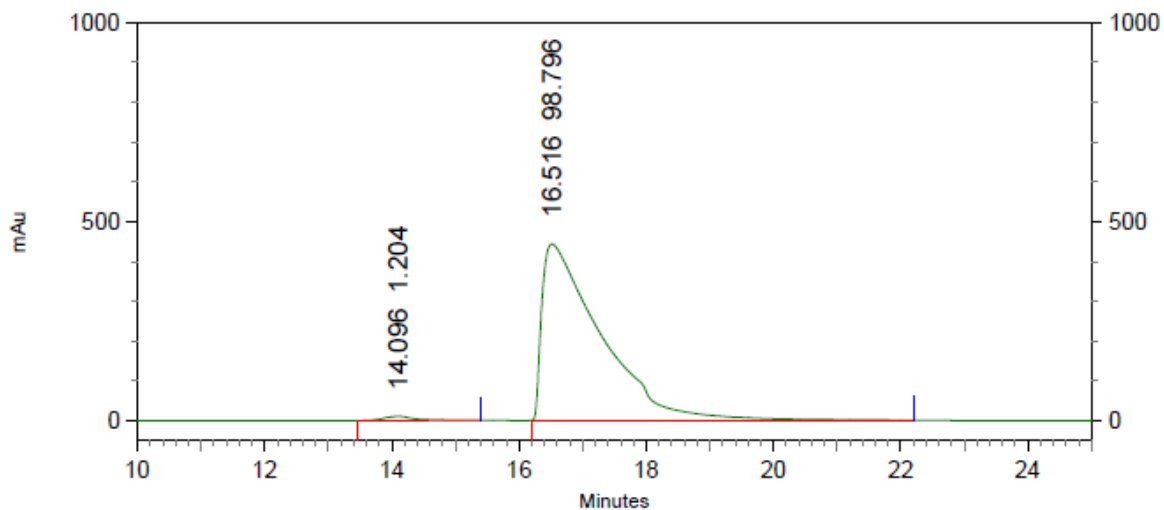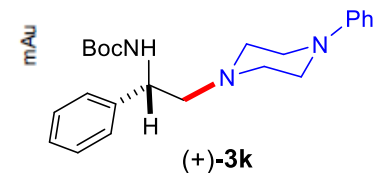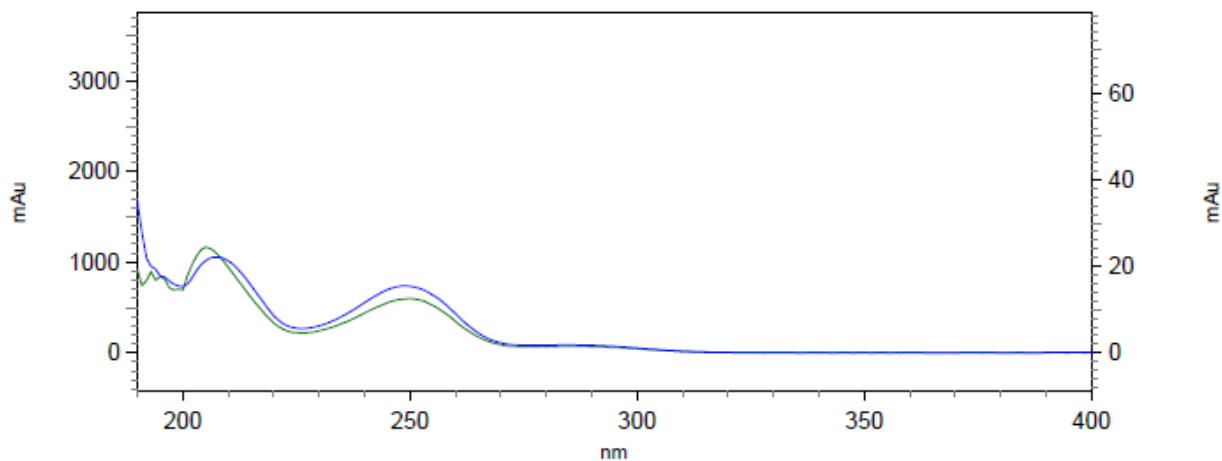

4: 240 nm, 4  
 nm Results

| Pk # | Retention Time | Area Percent |
|------|----------------|--------------|
| 1    | 14.096         | 1.204        |
| 2    | 16.516         | 98.796       |

|        |         |
|--------|---------|
| Totals | 100.000 |
|--------|---------|

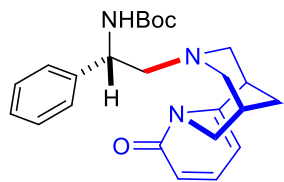

$^1\text{H}$  NMR of **3I**,  
600 MHz,  $\text{CDCl}_3$

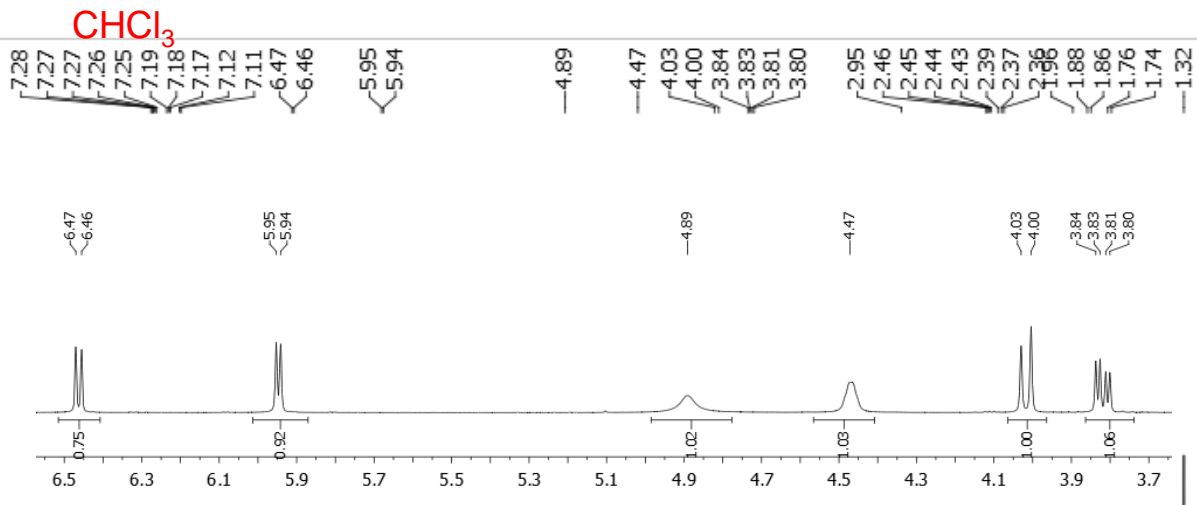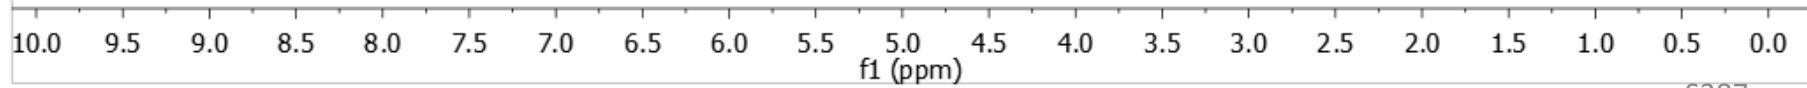

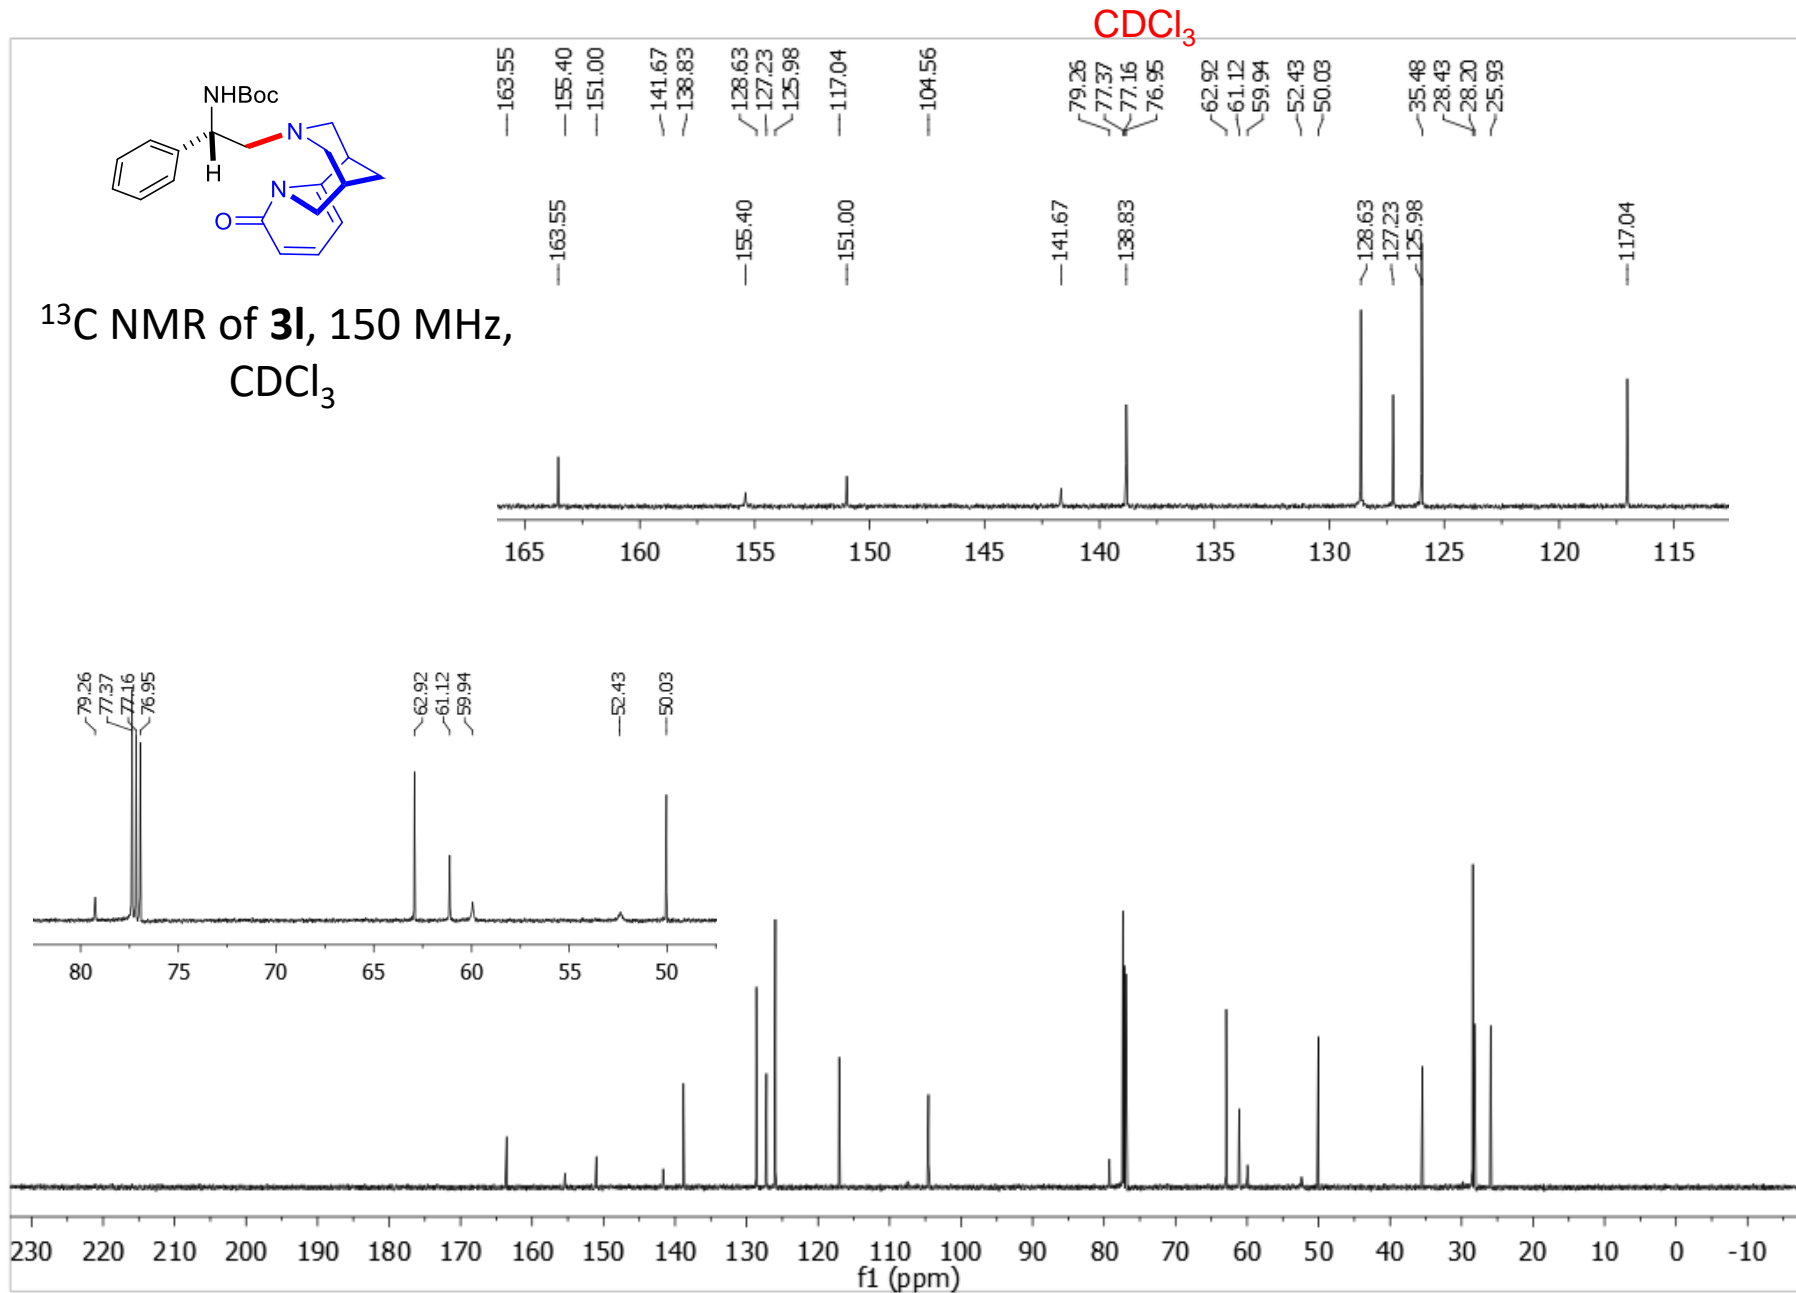

$^1\text{H}$  NMR of **3I**,  
600 MHz,  $\text{C}_6\text{D}_6$

Benzenes

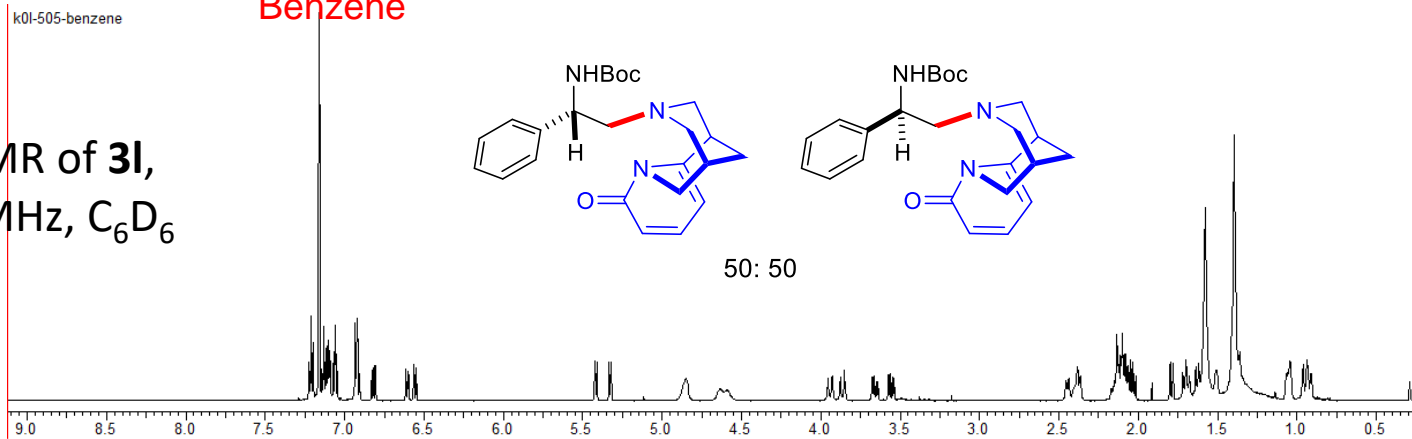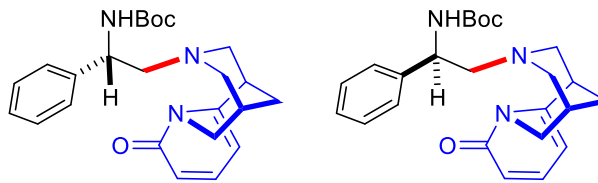

50: 50

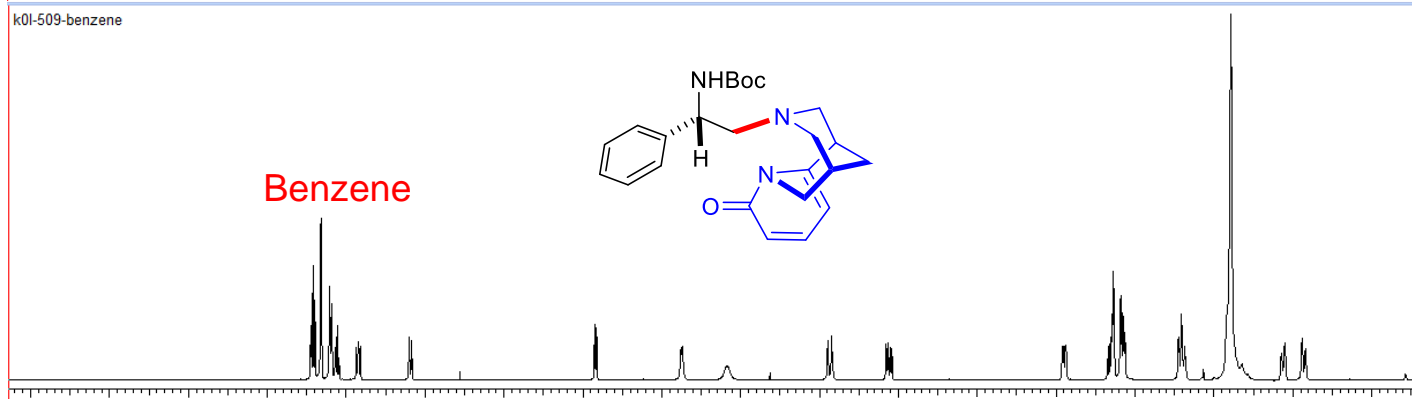

Benzenes

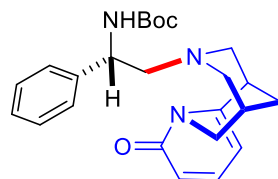

50: 50

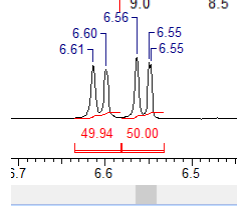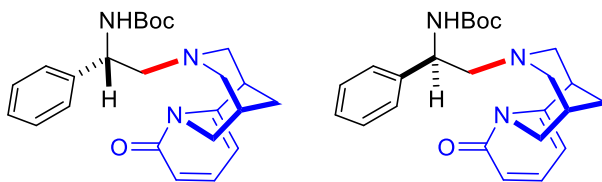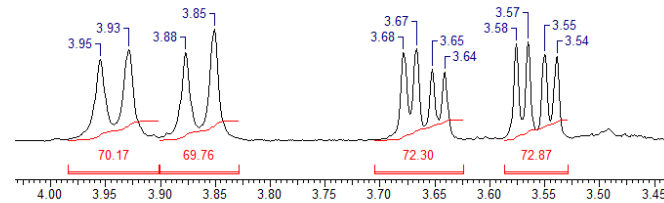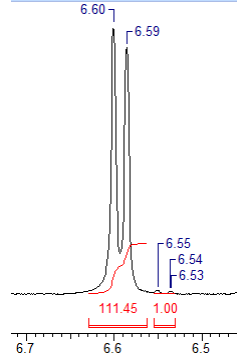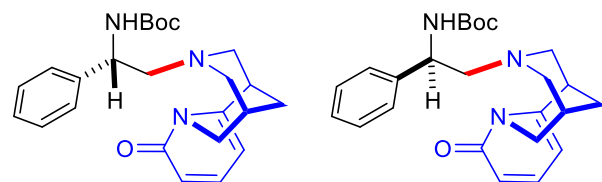

> 99: 1

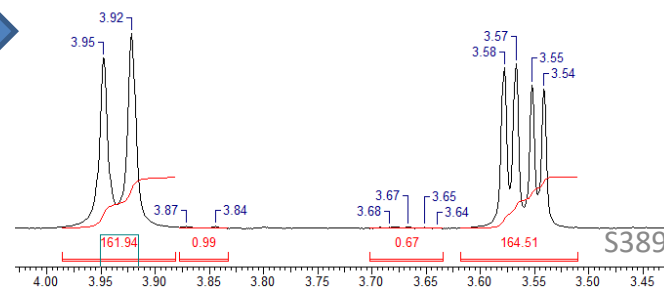

S389

CHCl<sub>3</sub>

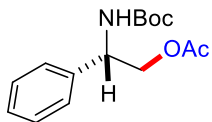

<sup>1</sup>H NMR of **3m**, 600 MHz, CDCl<sub>3</sub>

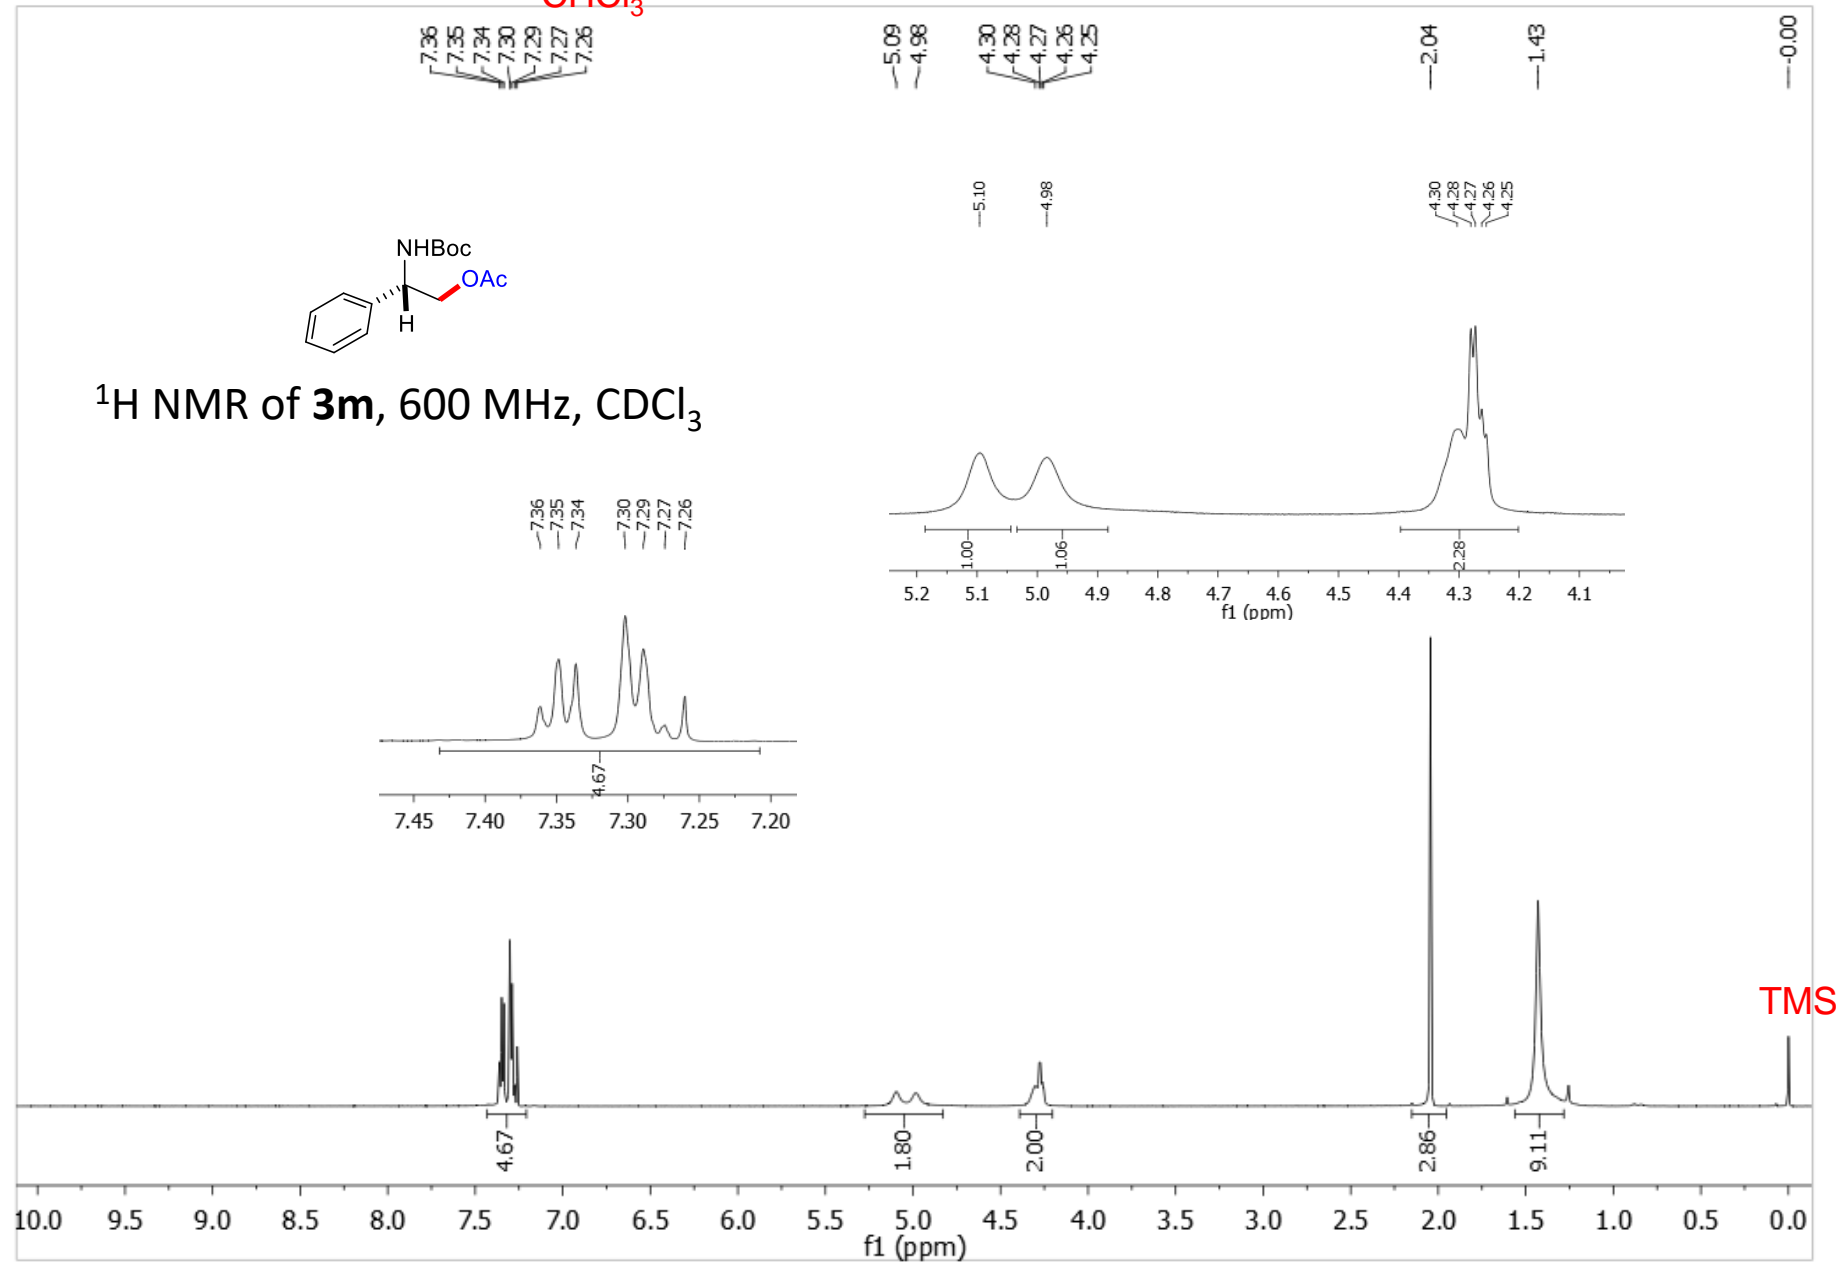

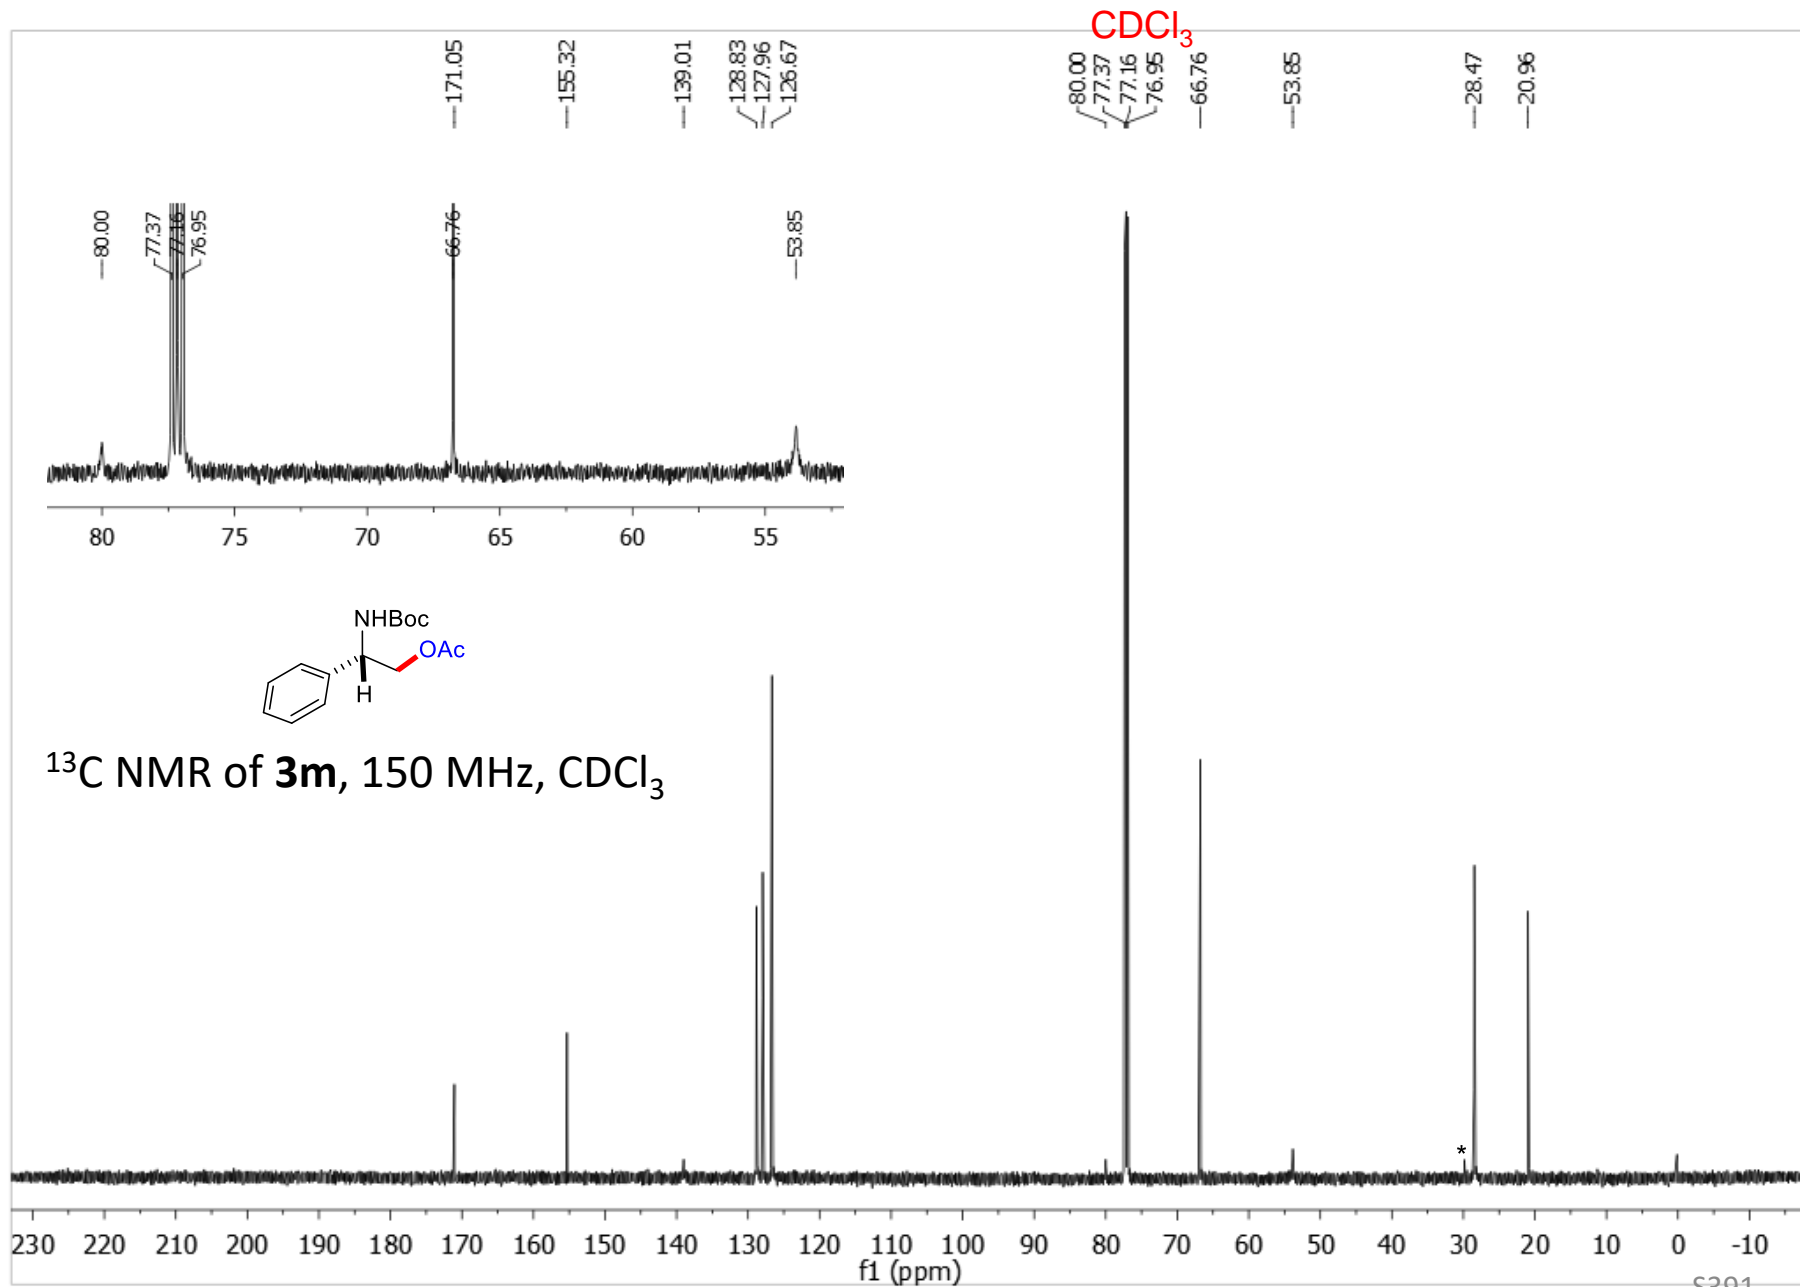



C:\EZStart\Projects\Default\Data\K0L-378-ADH-7%  
 C:\Documents and Settings\zhang\Desktop\DSW\0210.met

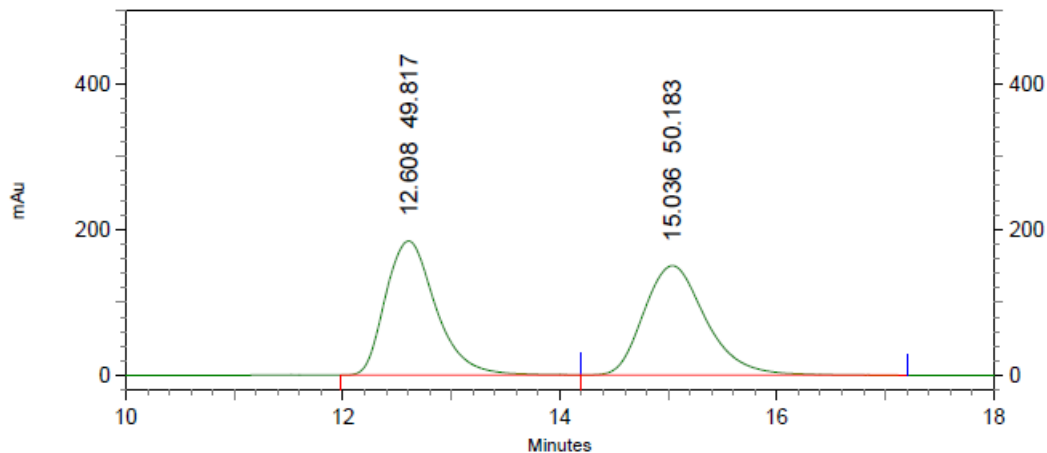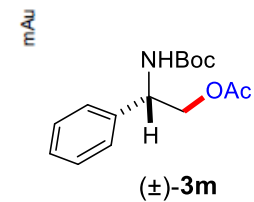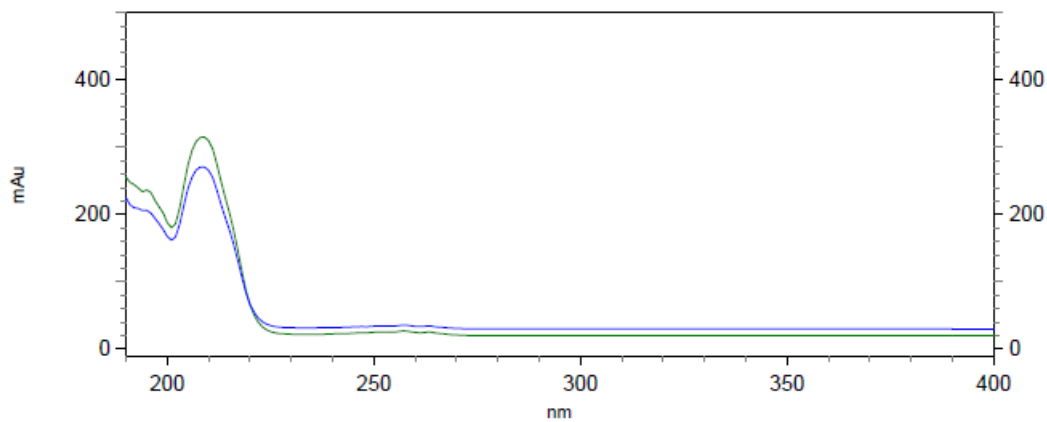

5: 213 nm, 4  
 nm Results

| Pk #   | Retention Time | Area Percent |
|--------|----------------|--------------|
| 1      | 12.608         | 49.817       |
| 2      | 15.036         | 50.183       |
| Totals |                | 100.000      |

C:\EZStart\Projects\Default\Data\K0L-377-ADH-7%  
C:\Documents and Settings\zhang\Desktop\DSW\0210.met

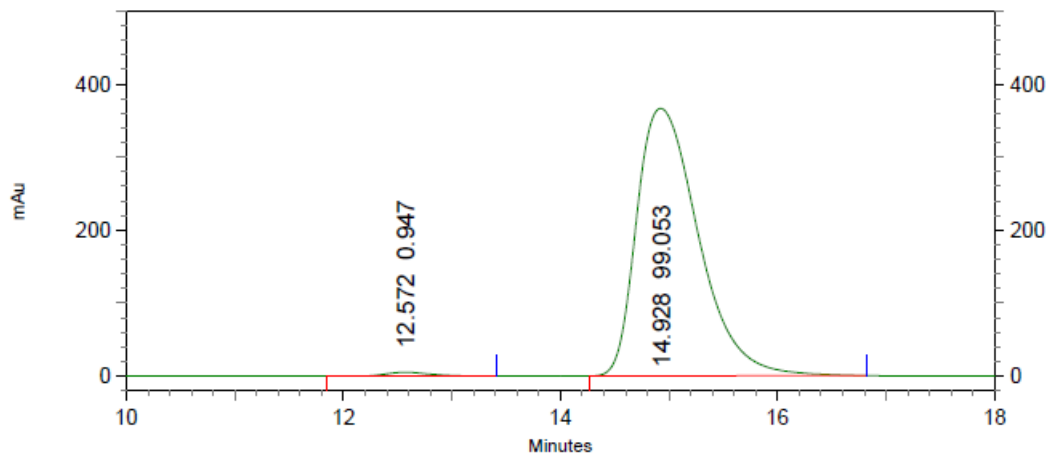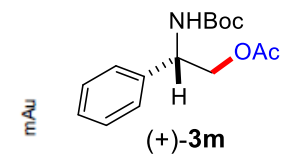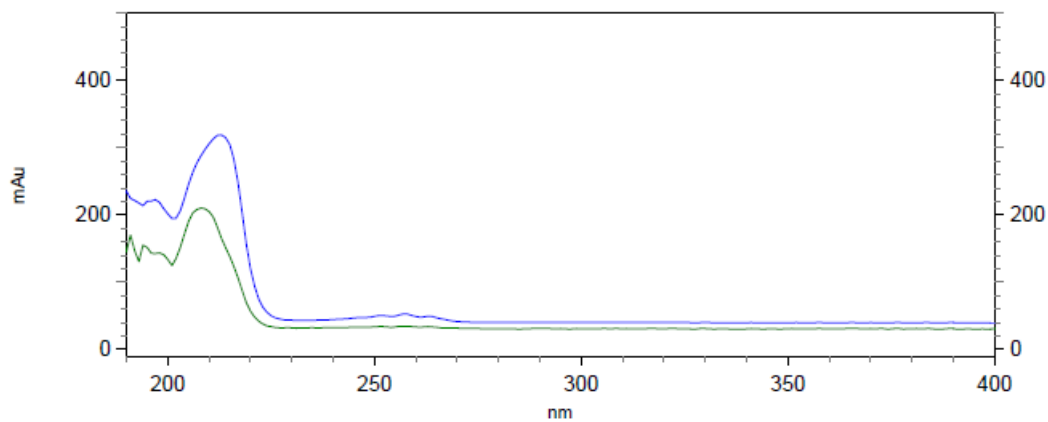

5: 216 nm, 4  
nm Results

| Pk #   | Retention Time | Area Percent |
|--------|----------------|--------------|
| 1      | 12.572         | 0.947        |
| 2      | 14.928         | 99.053       |
| Totals |                | 100.000      |

## checkCIF/PLATON report

Structure factors have been supplied for datablock(s) C15H21NO4

THIS REPORT IS FOR GUIDANCE ONLY. IF USED AS PART OF A REVIEW PROCEDURE FOR PUBLICATION, IT SHOULD NOT REPLACE THE EXPERTISE OF AN EXPERIENCED CRYSTALLOGRAPHIC REFEREE.

No syntax errors found. [CIF dictionary](#) [Interpreting this report](#)

### Datablock: C15H21NO4

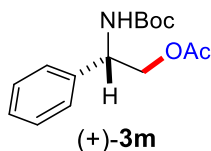

Bond precision: C-C = 0.0024 Å      Wavelength=1.54178  
Cell:            a=5.2404 (2)      b=10.6394 (4)      c=27.3903 (10)  
                  alpha=90      beta=90      gamma=90  
Temperature:    100 K

|                        | Calculated   | Reported     |
|------------------------|--------------|--------------|
| Volume                 | 1527.14 (10) | 1527.14 (10) |
| Space group            | P 21 21 21   | P 21 21 21   |
| Hall group             | P 2ac 2ab    | P 2ac 2ab    |
| Moiety formula         | C15 H21 N O4 | C15 H21 N O4 |
| Sum formula            | C15 H21 N O4 | C15 H21 N O4 |
| Mr                     | 279.33       | 279.33       |
| Dx, g cm <sup>-3</sup> | 1.215        | 1.215        |
| Z                      | 4            | 4            |
| Mu (mm <sup>-1</sup> ) | 0.721        | 0.721        |
| F000                   | 600.0        | 600.0        |
| F000'                  | 601.92       |              |
| h, k, lmax             | 6, 12, 32    | 6, 12, 32    |
| Nref                   | 2700 [ 1611] | 2682         |
| Tmin, Tmax             | 0.925, 0.944 | 0.660, 0.753 |
| Tmin'                  | 0.707        |              |

Correction method= # Reported T Limits: Tmin=0.660 Tmax=0.753  
AbsCorr = MULTI-SCAN

Data completeness= 1.66/0.99      Theta(max)= 66.566

R(reflections)= 0.0289 ( 2622)      wR2(reflections)= 0.0726 ( 2682)

S = 1.051      Npar= 188

The following ALERTS were generated. Each ALERT has the format  
**test-name\_ALERT\_alert-type\_alert-level.**  
Click on the hyperlinks for more details of the test.

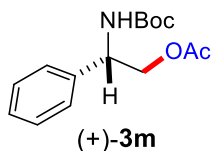

### Alert level C

PLAT911 ALERT 3 C Missing FCF Refl Between Thmin & STh/L= 0.595 4 Report

### Alert level G

|                   |                                                  |          |
|-------------------|--------------------------------------------------|----------|
| PLAT002 ALERT 2 G | Number of Distance or Angle Restraints on AtSite | 2 Note   |
| PLAT172 ALERT 4 G | The CIF-Embedded .res File Contains DFIX Records | 1 Report |
| PLAT791 ALERT 4 G | Model has Chirality at C4 (Chiral SPGR)          | 8 Verify |
| PLAT860 ALERT 3 G | Number of Least-Squares Restraints .....         | 1 Note   |
| PLAT909 ALERT 3 G | Percentage of I>2sig(I) Data at Theta(Max) Still | 96% Note |
| PLAT913 ALERT 3 G | Missing # of Very Strong Reflections in FCF .... | 1 Note   |
| PLAT978 ALERT 2 G | Number C-C Bonds with Positive Residual Density. | 2 Info   |

0 ALERT level A = Most likely a serious problem - resolve or explain  
 0 ALERT level B = A potentially serious problem, consider carefully  
 1 ALERT level C = Check. Ensure it is not caused by an omission or oversight  
 7 ALERT level G = General information/check it is not something unexpected

0 ALERT type 1 CIF construction/syntax error, inconsistent or missing data  
 2 ALERT type 2 Indicator that the structure model may be wrong or deficient  
 4 ALERT type 3 Indicator that the structure quality may be low  
 2 ALERT type 4 Improvement, methodology, query or suggestion  
 0 ALERT type 5 Informative message, check

It is advisable to attempt to resolve as many as possible of the alerts in all categories. Often the minor alerts point to easily fixed oversights, errors and omissions in your CIF or refinement strategy, so attention to these fine details can be worthwhile. In order to resolve some of the more serious problems it may be necessary to carry out additional measurements or structure refinements. However, the purpose of your study may justify the reported deviations and the more serious of these should normally be commented upon in the discussion or experimental section of a paper or in the "special\_details" fields of the CIF. checkCIF was carefully designed to identify outliers and unusual parameters, but every test has its limitations and alerts that are not important in a particular case may appear. Conversely, the absence of alerts does not guarantee there are no aspects of the results needing attention. It is up to the individual to critically assess their own results and, if necessary, seek expert advice.

#### Publication of your CIF in IUCr journals

A basic structural check has been run on your CIF. These basic checks will be run on all CIFs submitted for publication in IUCr journals (*Acta Crystallographica*, *Journal of Applied Crystallography*, *Journal of Synchrotron Radiation*); however, if you intend to submit to *Acta Crystallographica Section C* or *E* or *IUCrData*, you should make sure that [full publication checks](#) are run on the final version of your CIF prior to submission.

#### Publication of your CIF in other journals

Please refer to the *Notes for Authors* of the relevant journal for any special instructions relating to CIF submission.

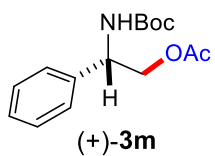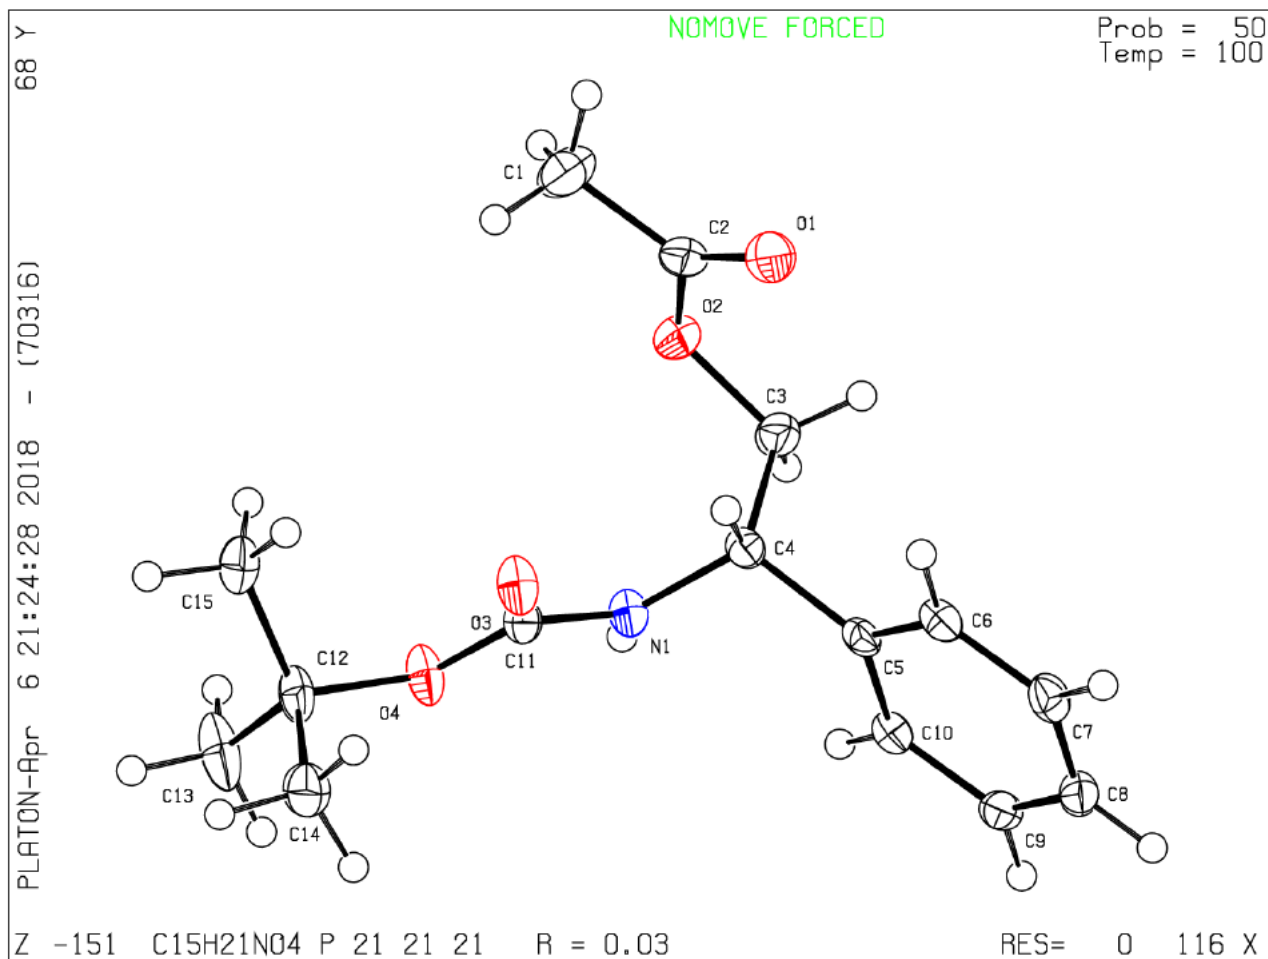



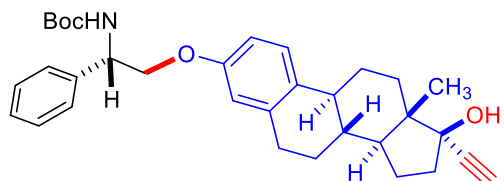

<sup>13</sup>C NMR of **3n**, 150 MHz,  
CDCl<sub>3</sub>

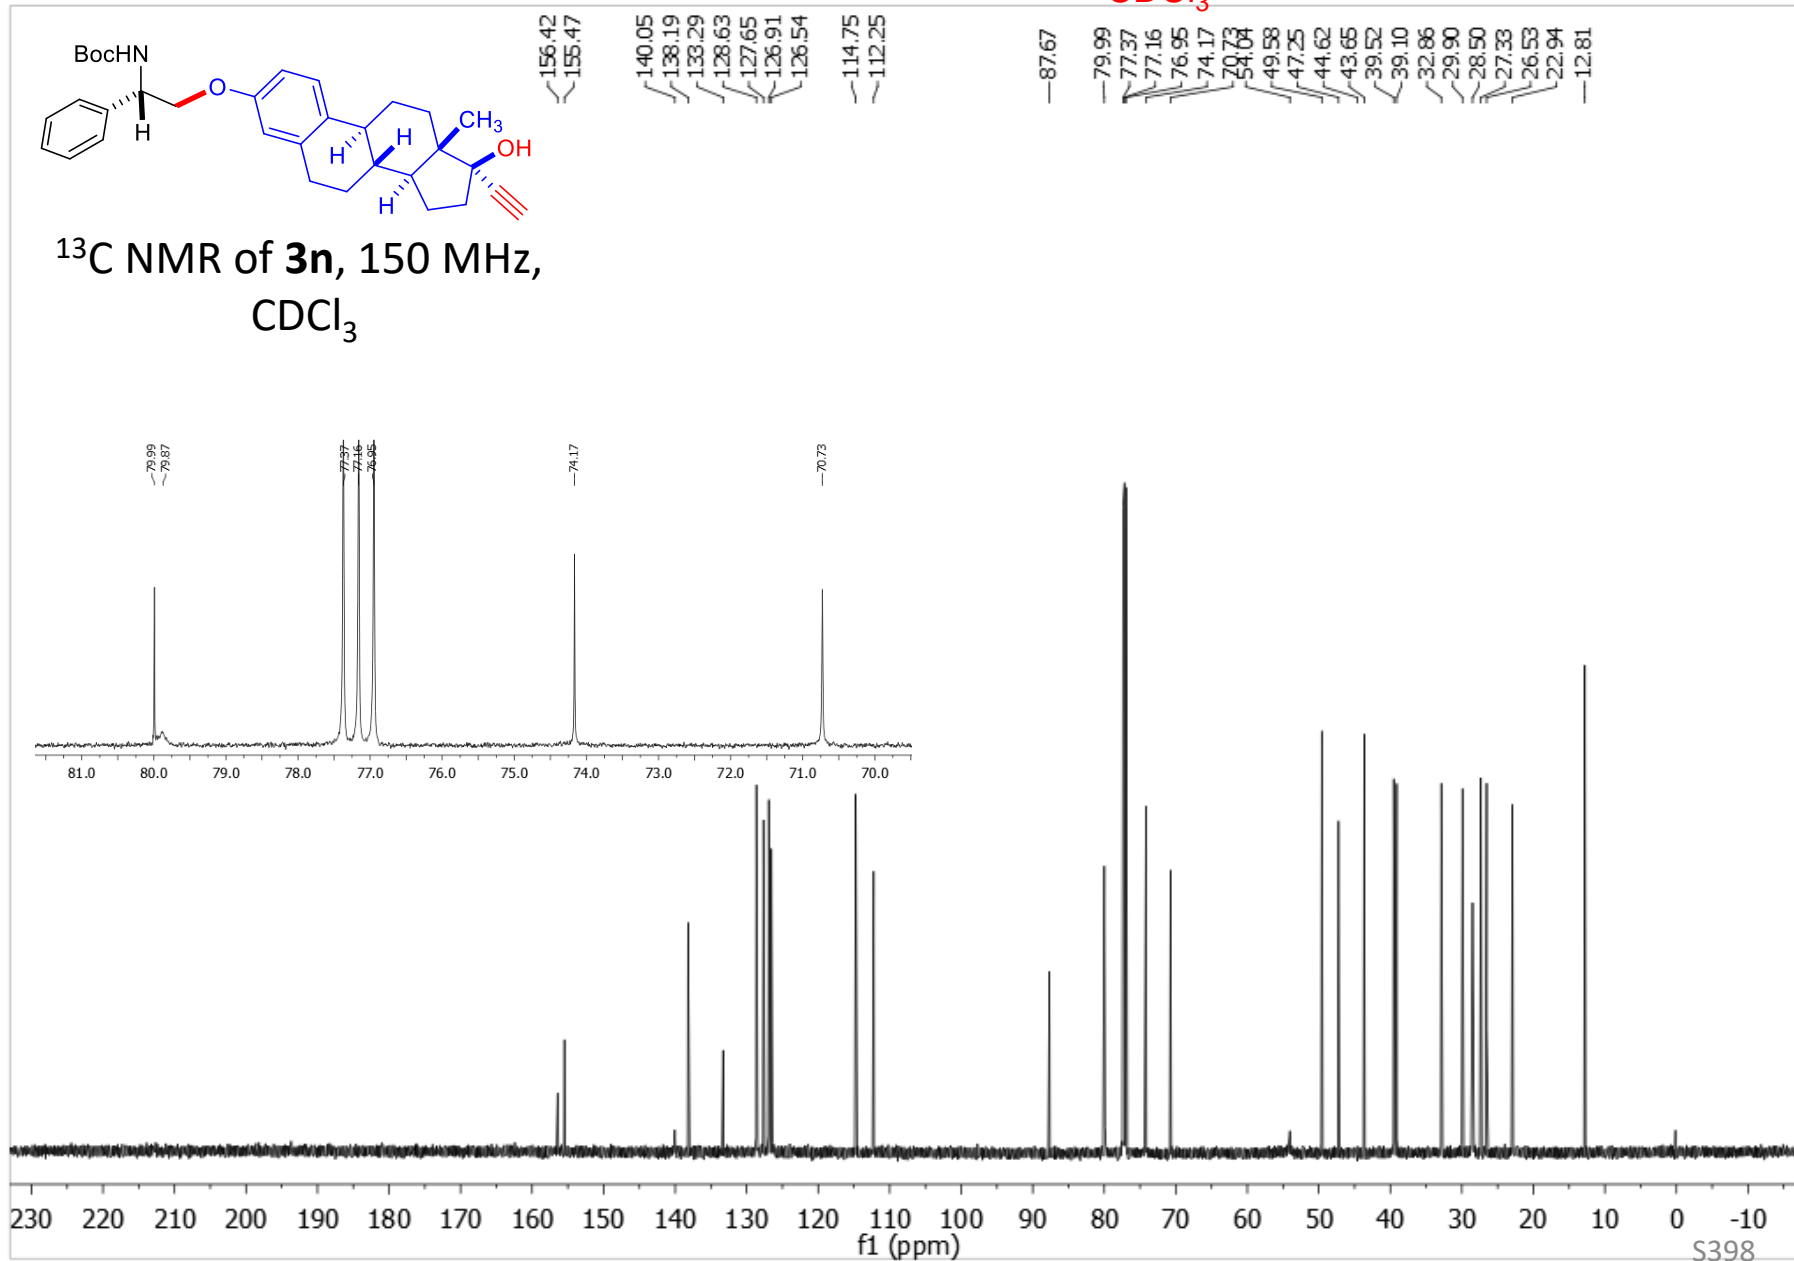

K0L-478-ADH-10%1.0  
 C:\EZStart\Projects\Default\Data\K0L-478-ADH-10%1.0  
 C:\EZStart\Projects\Default\Method\SMG-OJ-H-20%1ml-report.met

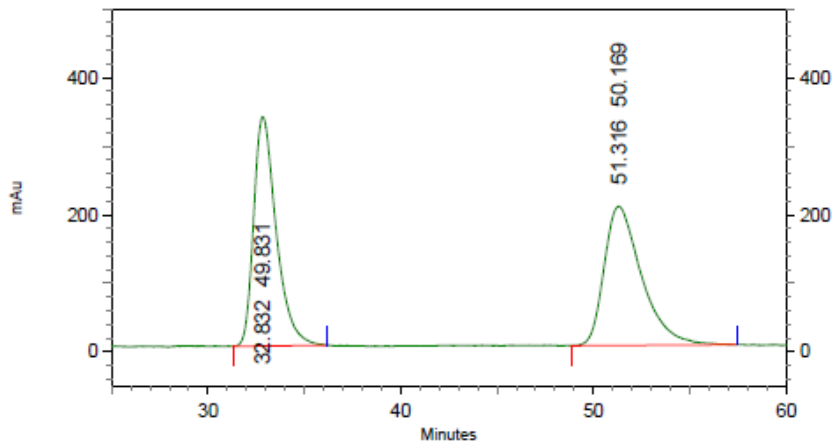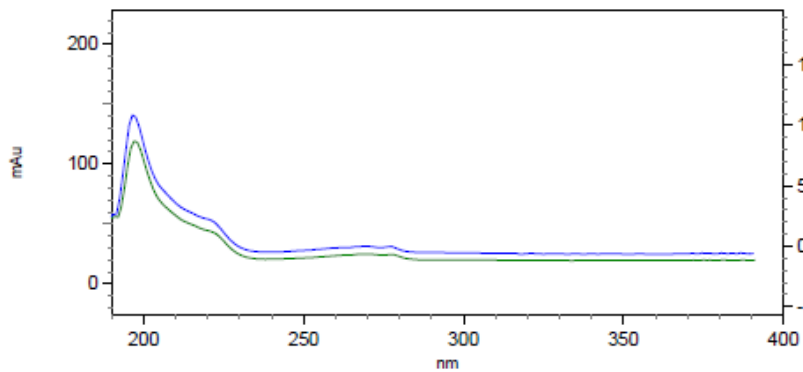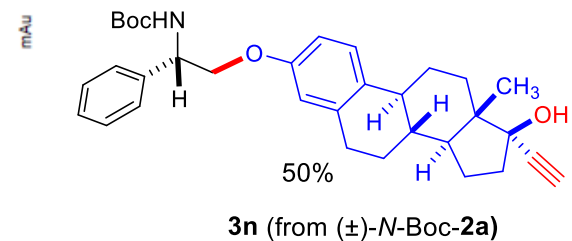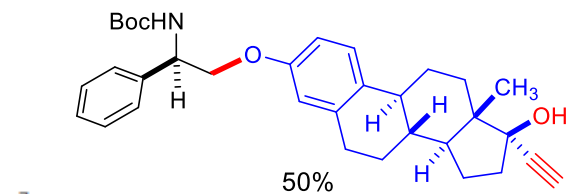

2: 210 nm, 4  
 nm Results

| Pk # | Retention Time | Area Percent |
|------|----------------|--------------|
| 1    | 32.832         | 49.831       |
| 2    | 51.316         | 50.169       |

|        |  |         |
|--------|--|---------|
| Totals |  | 100.000 |
|--------|--|---------|



KOL-477-ADH-10%1.0

C:\EZStart\Projects\Default\Data\KOL-477-ADH-10%1.0

C:\EZStart\Projects\Default\Method\SMG-OJ-H-20%1ml-report.met

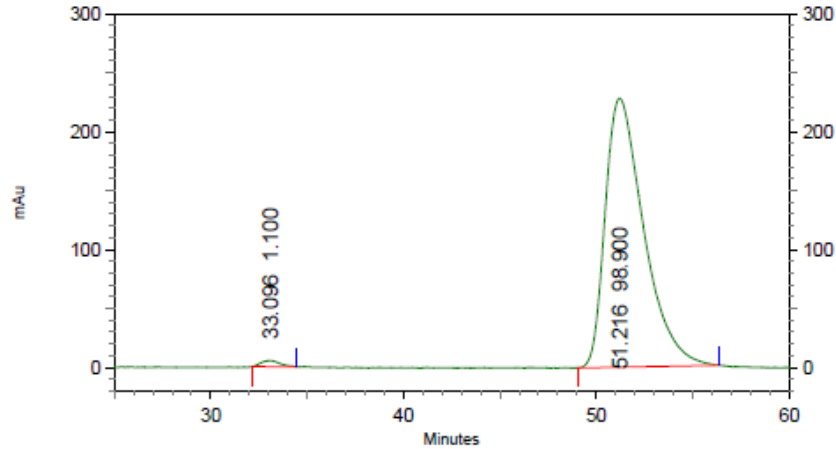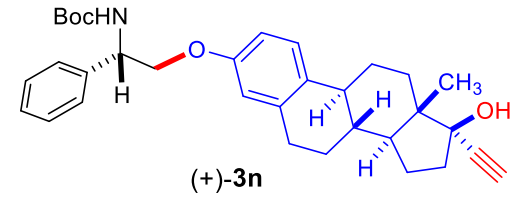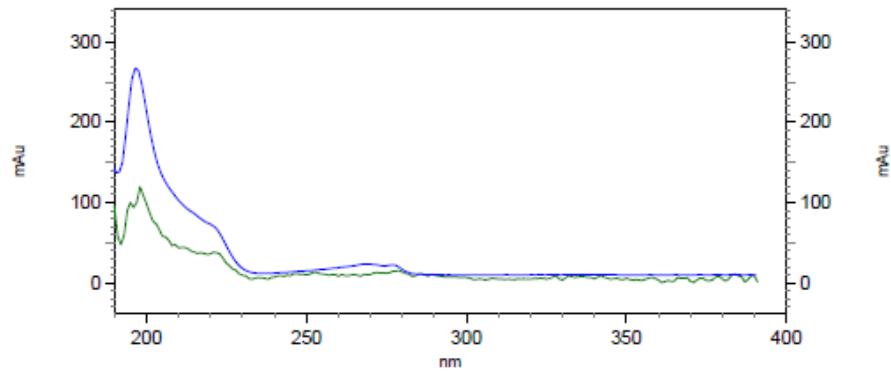

2: 210 nm, 4  
nm Results

| Pk # | Retention Time | Area Percent |
|------|----------------|--------------|
| 1    | 33.096         | 1.100        |
| 2    | 51.216         | 98.900       |

|        |         |
|--------|---------|
| Totals | 100.000 |
|--------|---------|

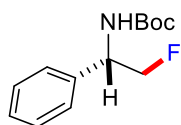

$^1\text{H}$  NMR of **3o**, 400 MHz,  $\text{CDCl}_3$

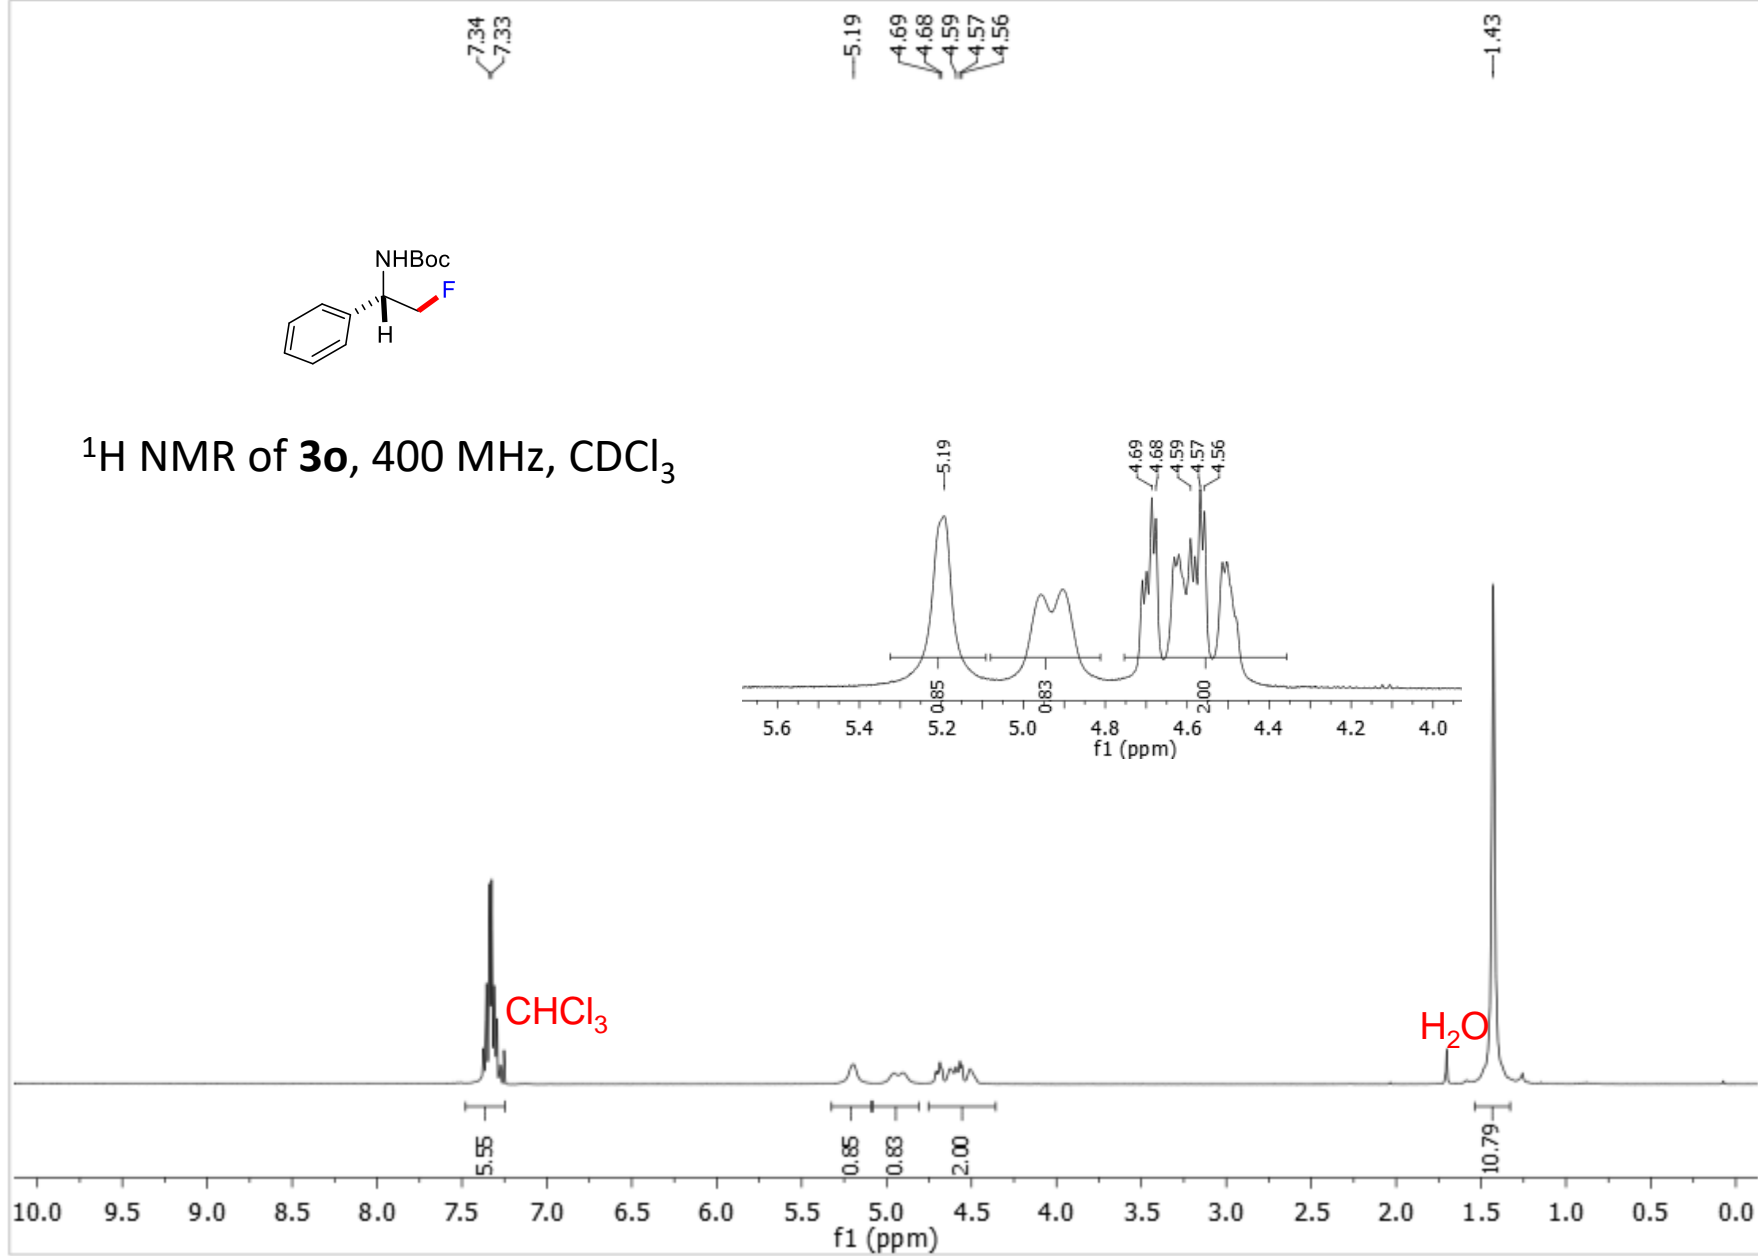

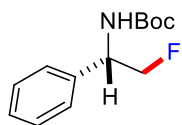

$^{13}\text{C}$  NMR of **3o**, 100 MHz,  $\text{CDCl}_3$

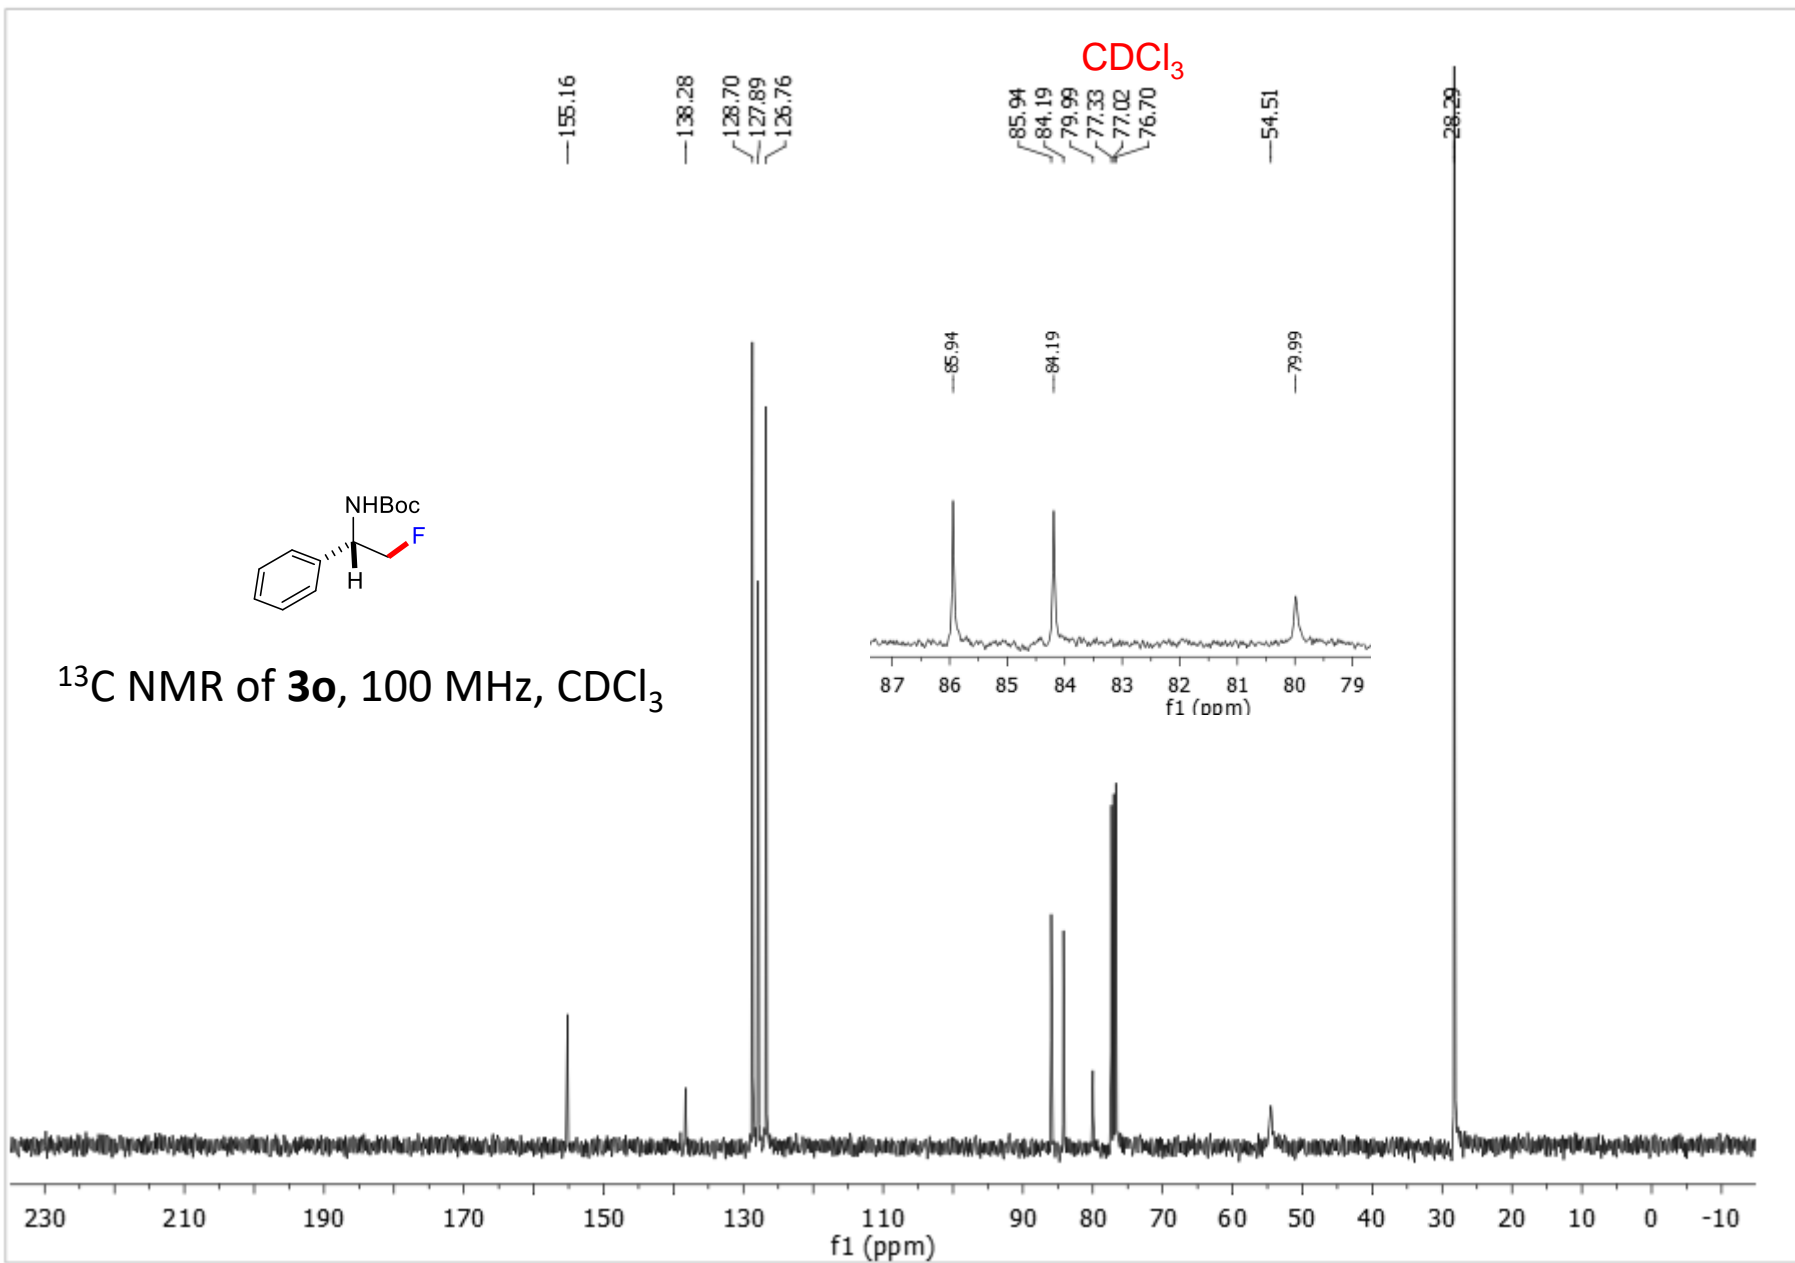

$\text{CFCl}_3$

---0.07

---226.99

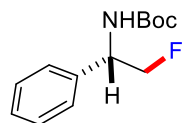

$^{19}\text{F}$  NMR of **3o**, 376 MHz,  $\text{CDCl}_3$

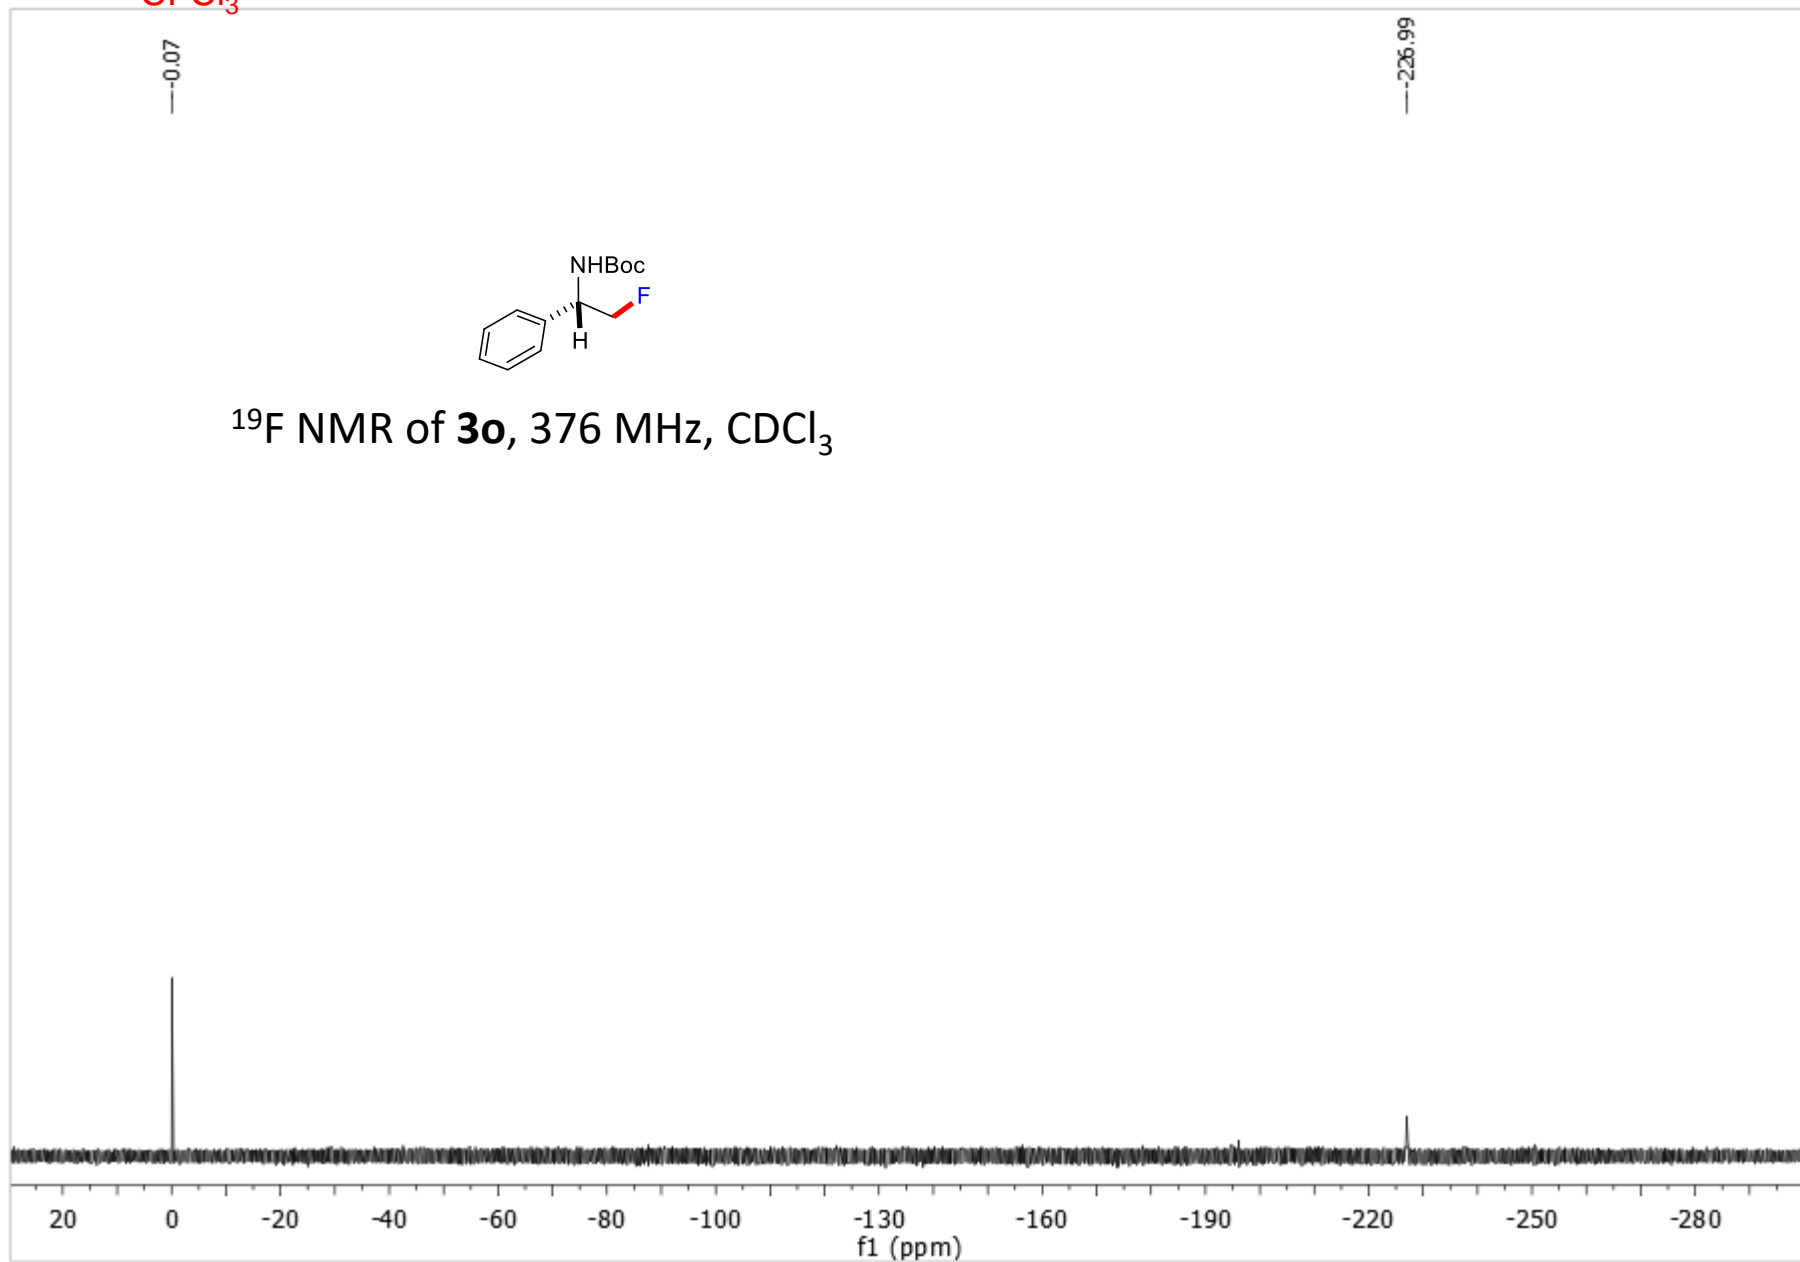

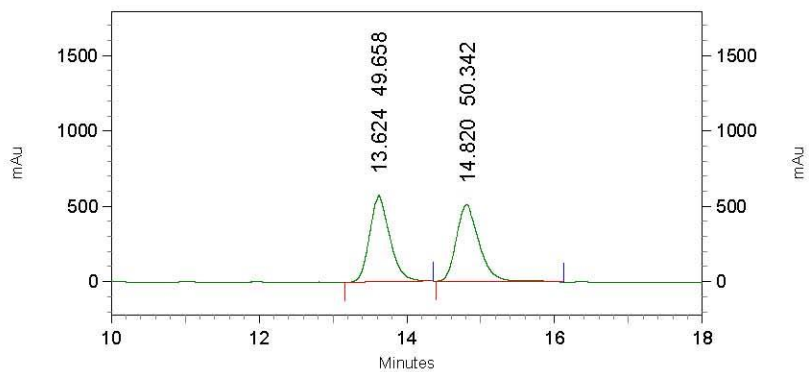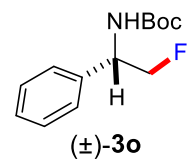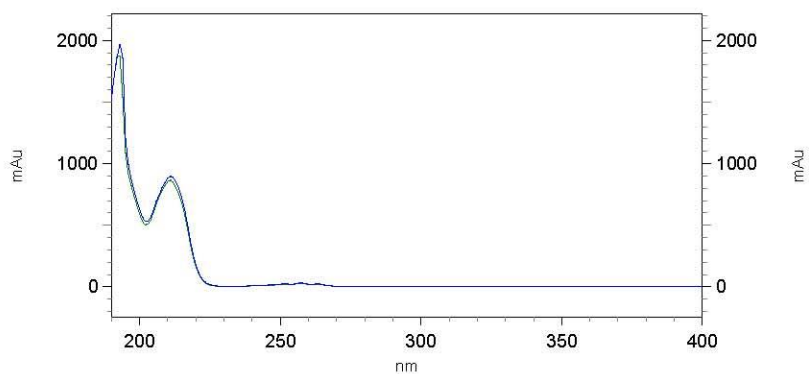

7: 196 nm, 4 nm

Results

| Pk #   | Name | Retention Time | Area Percent |
|--------|------|----------------|--------------|
| 1      |      | 13.624         | 49.658       |
| 2      |      | 14.820         | 50.342       |
| Totals |      |                | 100.000      |

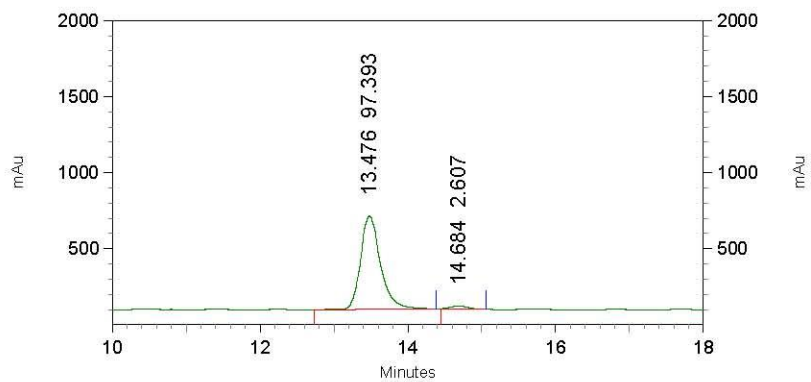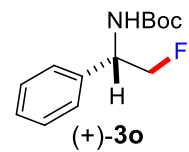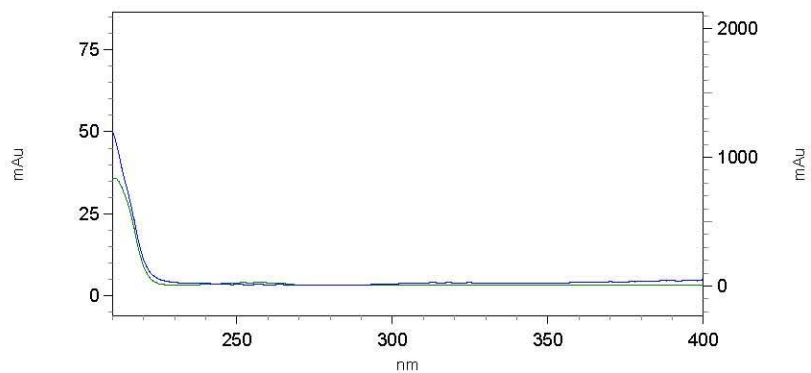

8: 195 nm, 4 nm  
Results

| Name   | Retention Time | Area Percent | Pk # |
|--------|----------------|--------------|------|
|        | 13.476         | 97.393       | 1    |
|        | 14.684         | 2.607        | 2    |
| Totals |                | 100.000      |      |

CHCl<sub>3</sub>

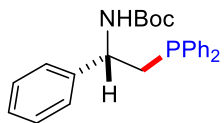

<sup>1</sup>H NMR of **3p**, 400 MHz, CDCl<sub>3</sub>

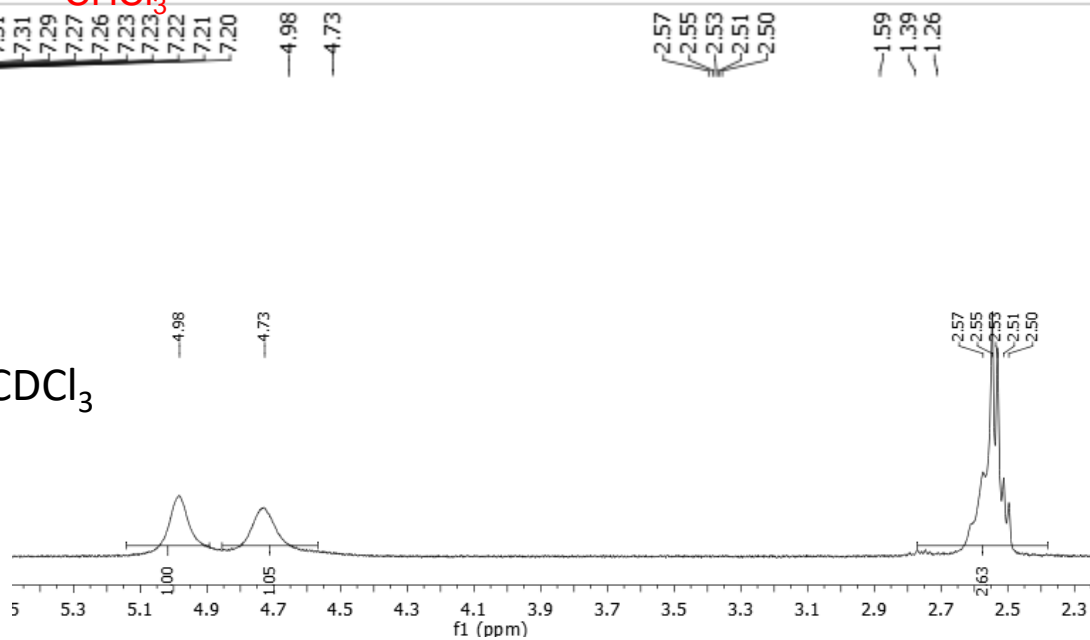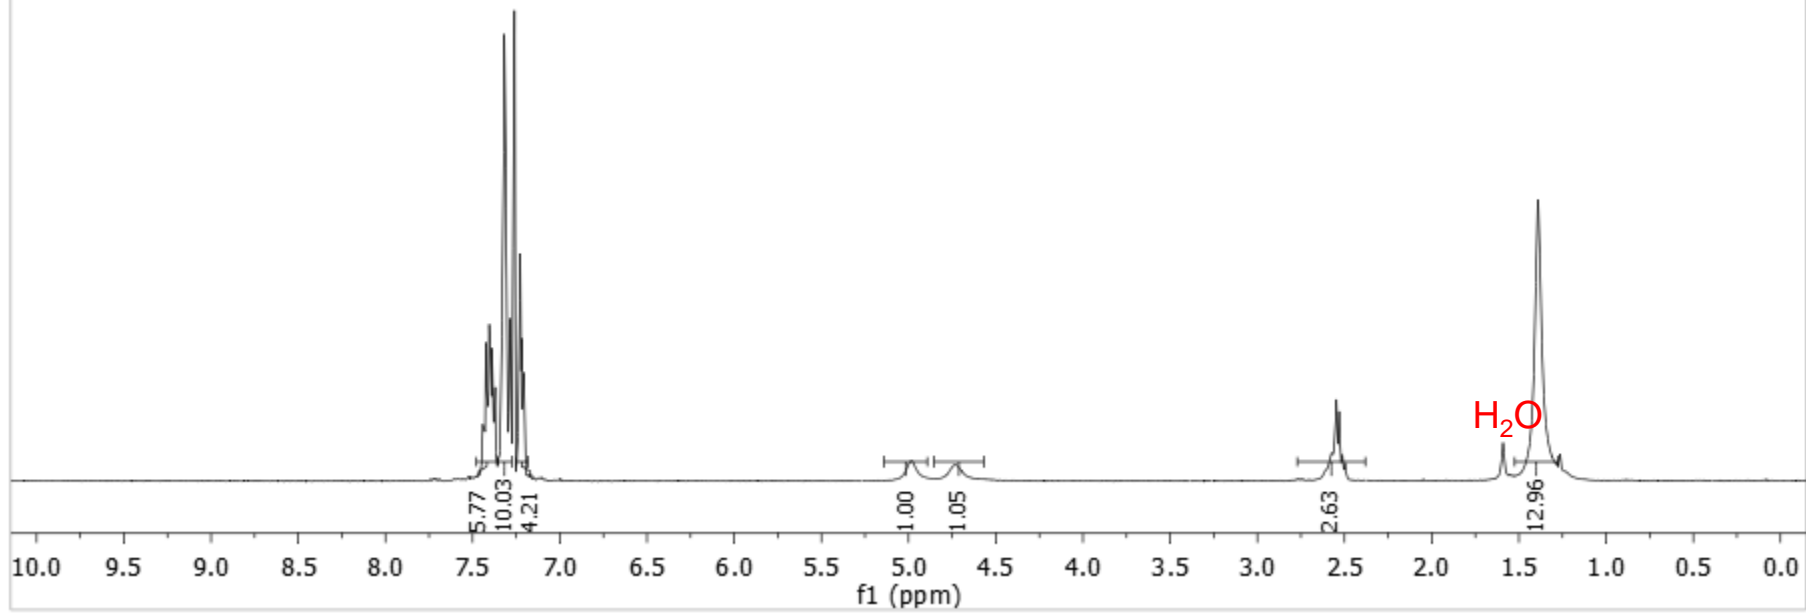

CDCl<sub>3</sub>

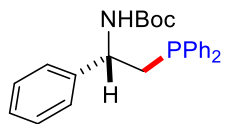

<sup>13</sup>C NMR of **3p**, 100 MHz, CDCl<sub>3</sub>

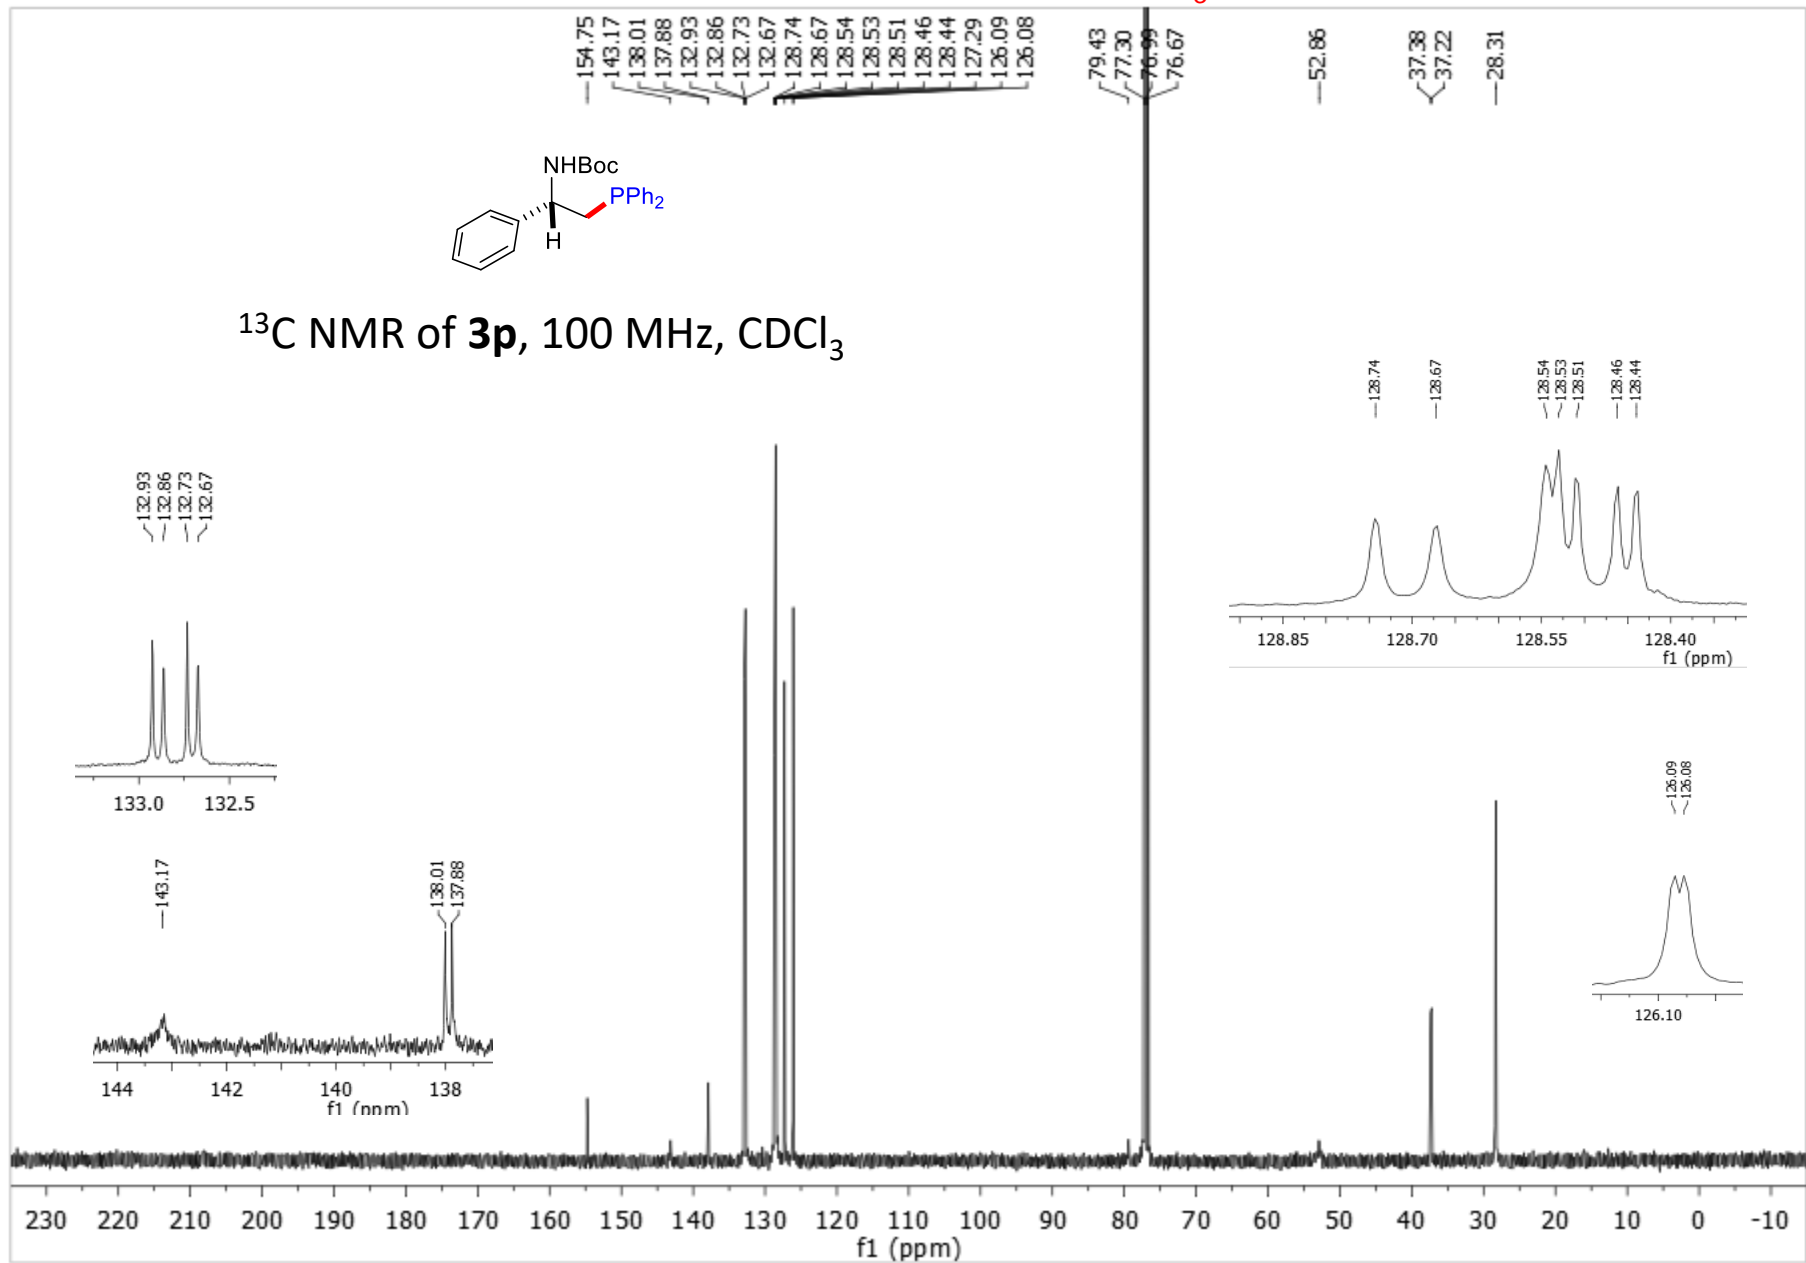



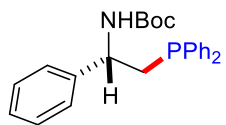

<sup>31</sup>P NMR of **3p**, 100 MHz, CDCl<sub>3</sub>

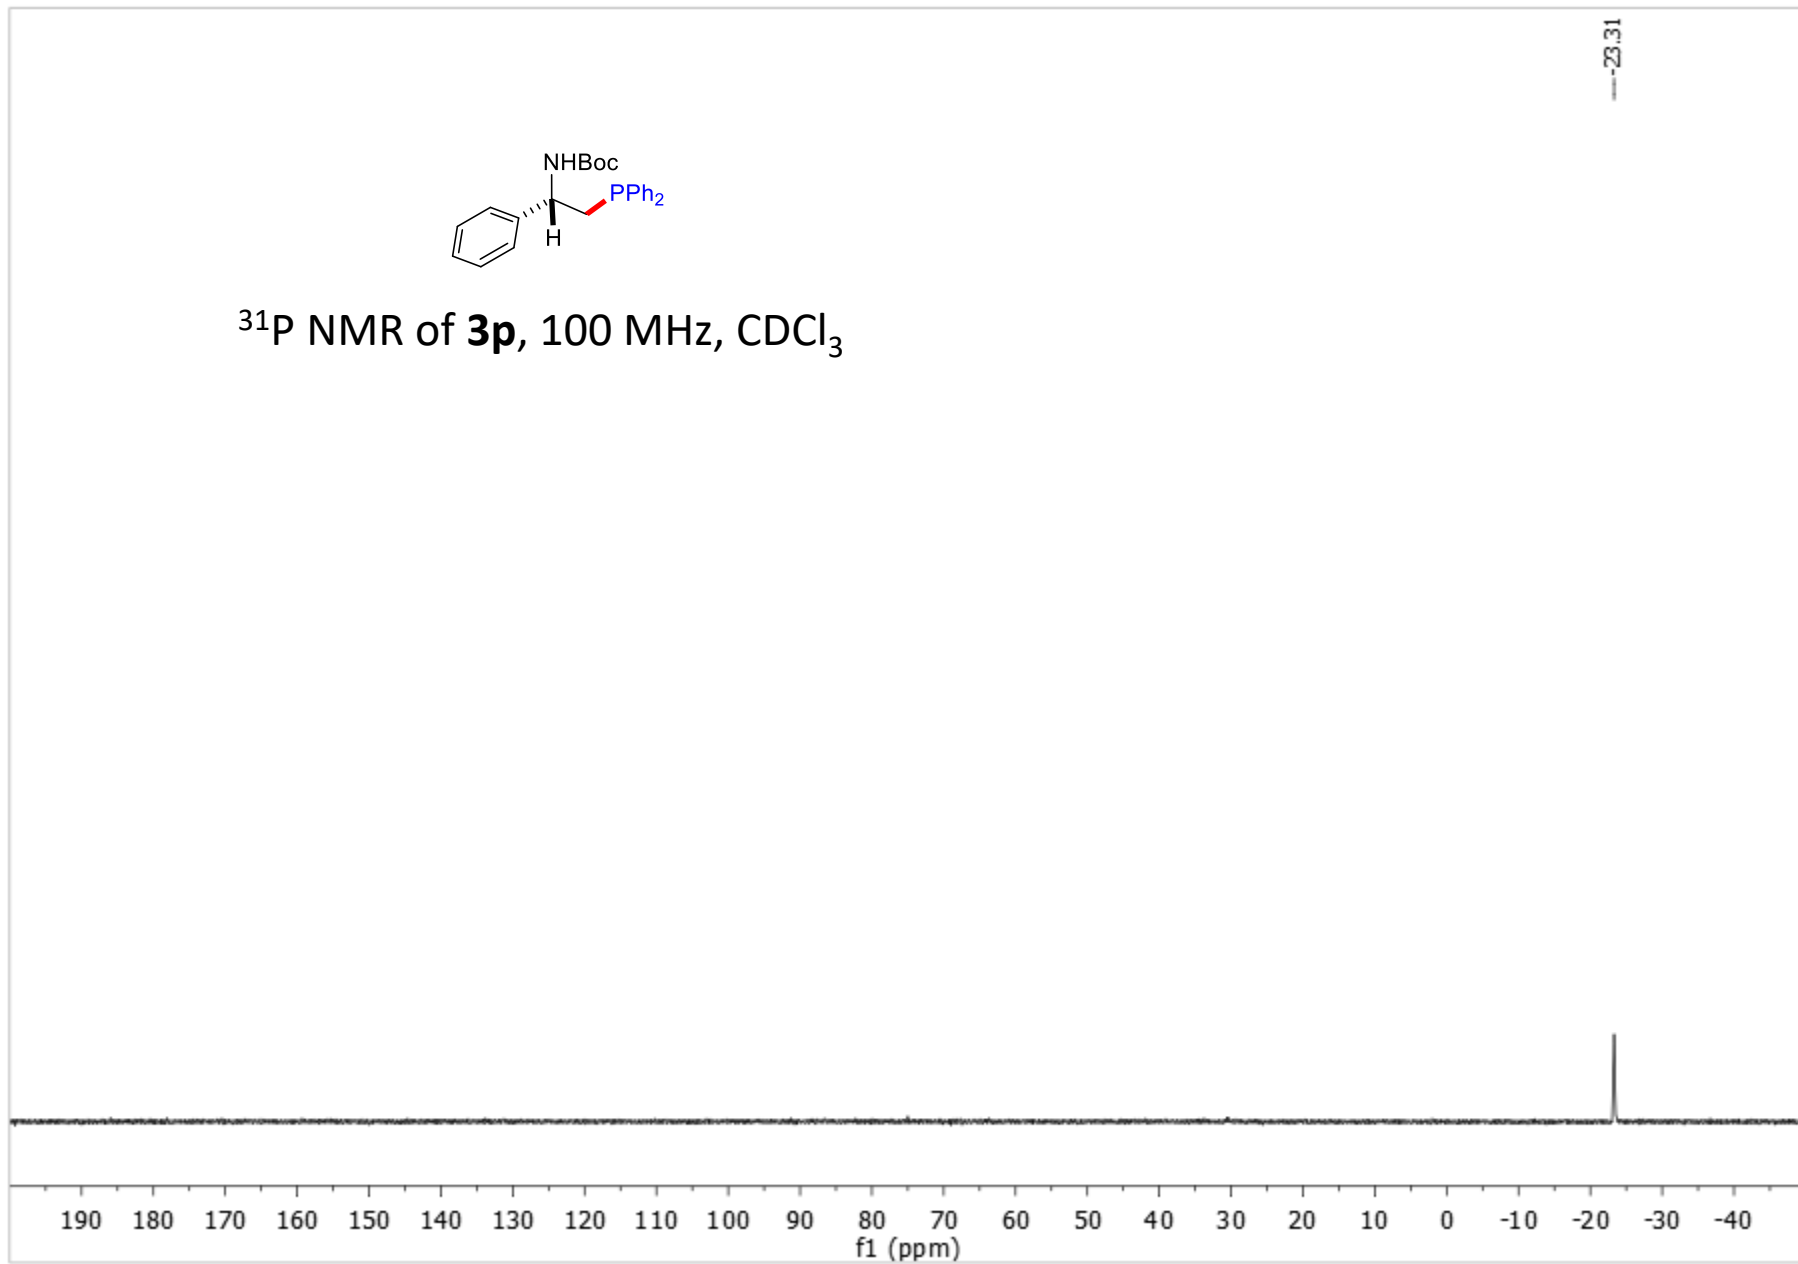

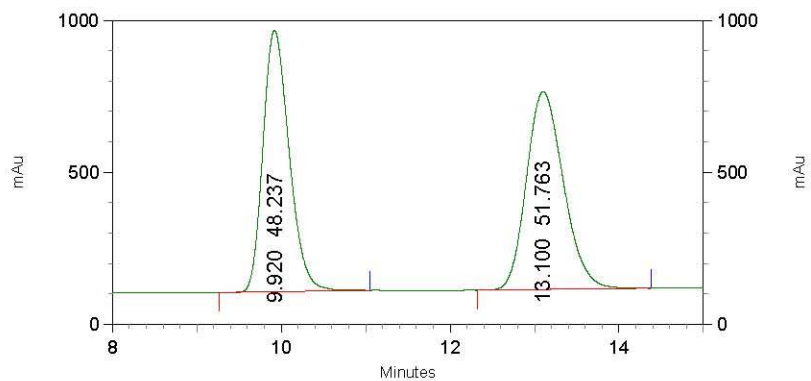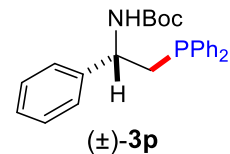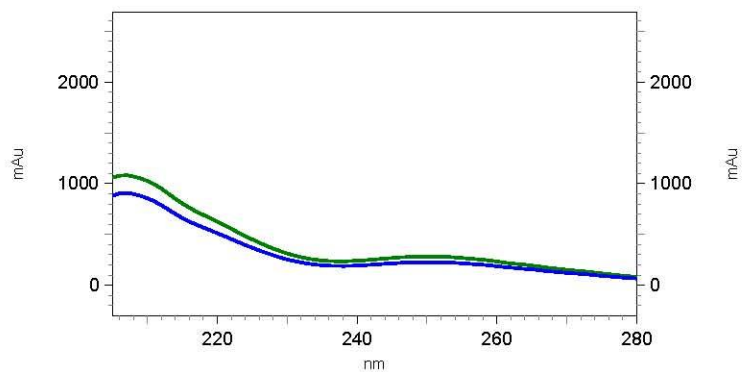

16: 215 nm, 4 nm  
Results

| Pk #   | Name | Retention Time | Area Percent |
|--------|------|----------------|--------------|
| 1      |      | 9.920          | 48.237       |
| 2      |      | 13.100         | 51.763       |
| Totals |      |                | 100.000      |

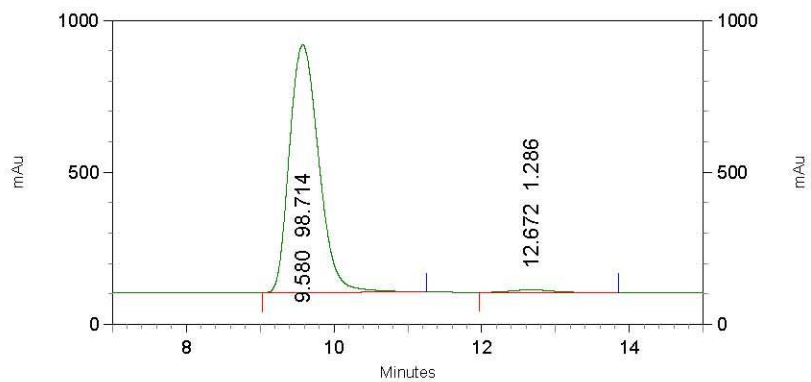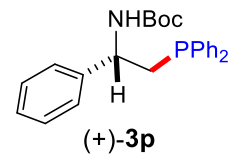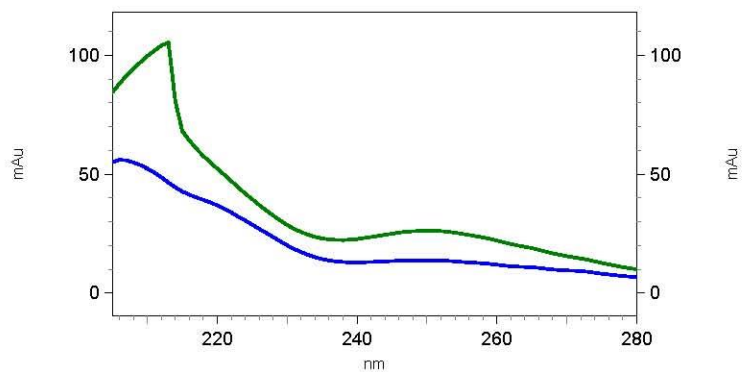

3: 256 nm, 4 nm  
Results

| Pk #   | Name | Retention Time | Area Percent |
|--------|------|----------------|--------------|
| 1      |      | 9.580          | 98.714       |
| 2      |      | 12.672         | 1.286        |
| Totals |      |                | 100.000      |

CHCl<sub>3</sub>

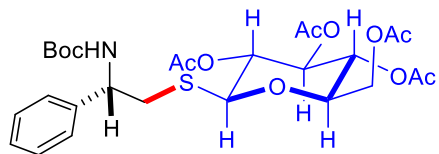

<sup>1</sup>H NMR of **3q**,  
600 MHz, CDCl<sub>3</sub>

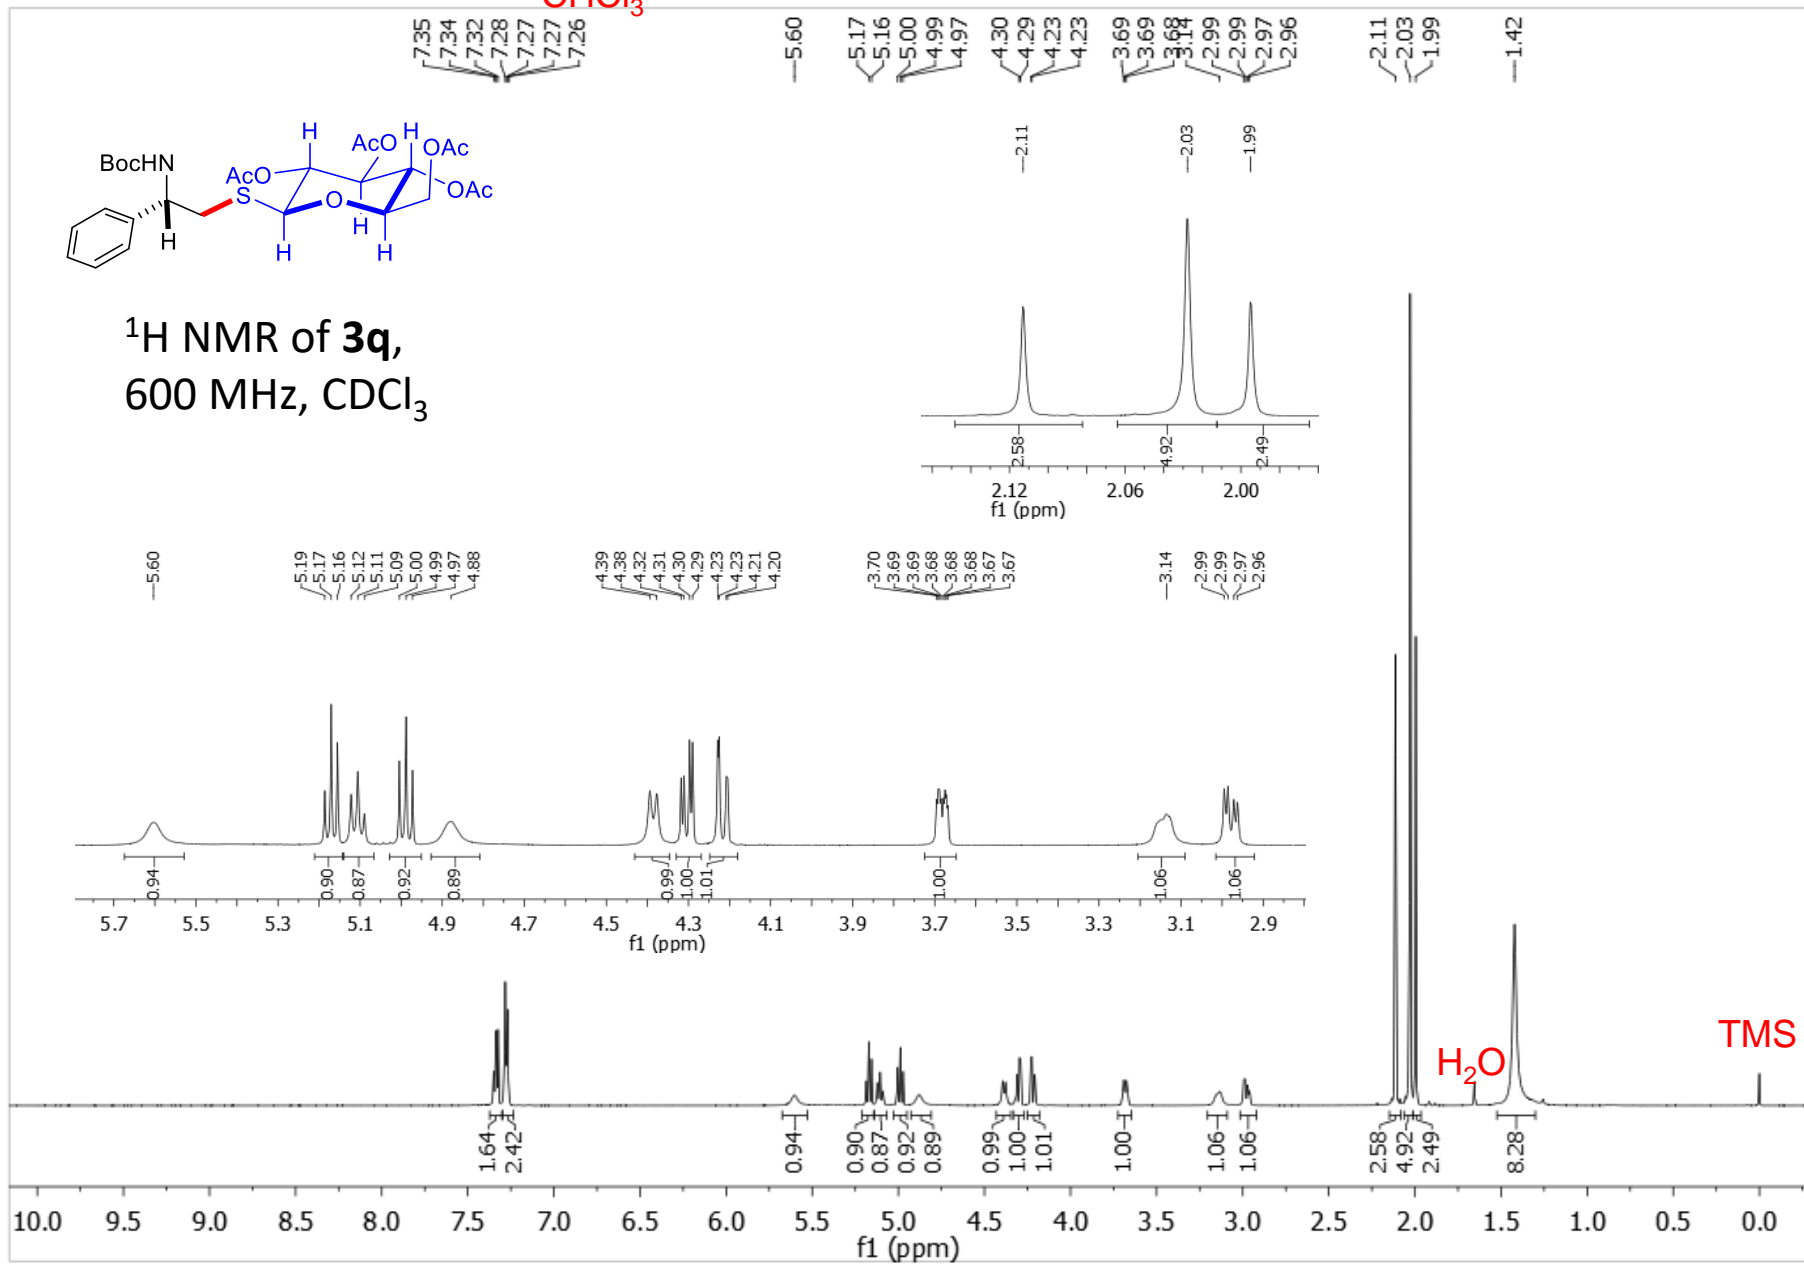

k0l-527-2-C13

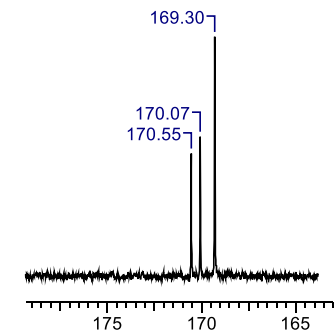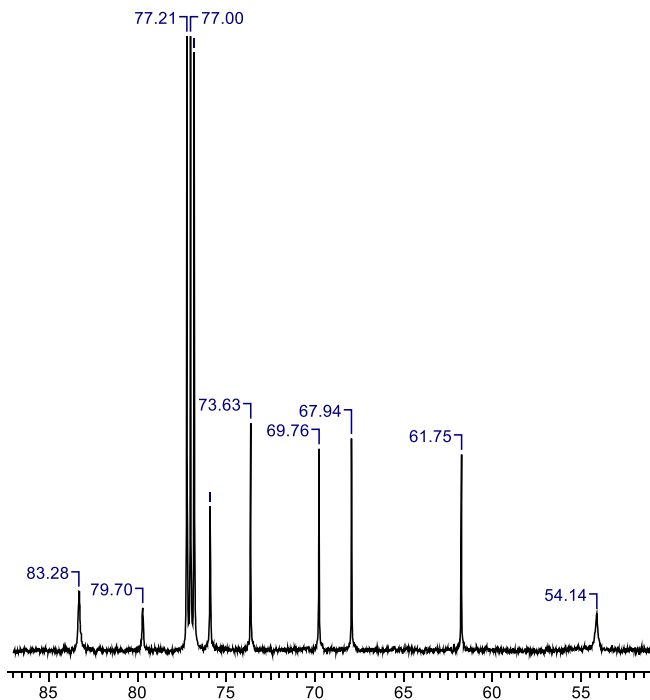

$\text{CDCl}_3$   
77.21 | 77.00

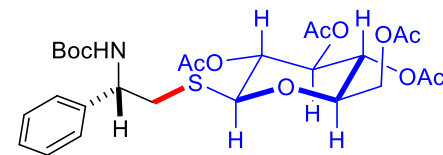

$^{13}\text{C}$  NMR of **3q**, 150 MHz,  
 $\text{CDCl}_3$

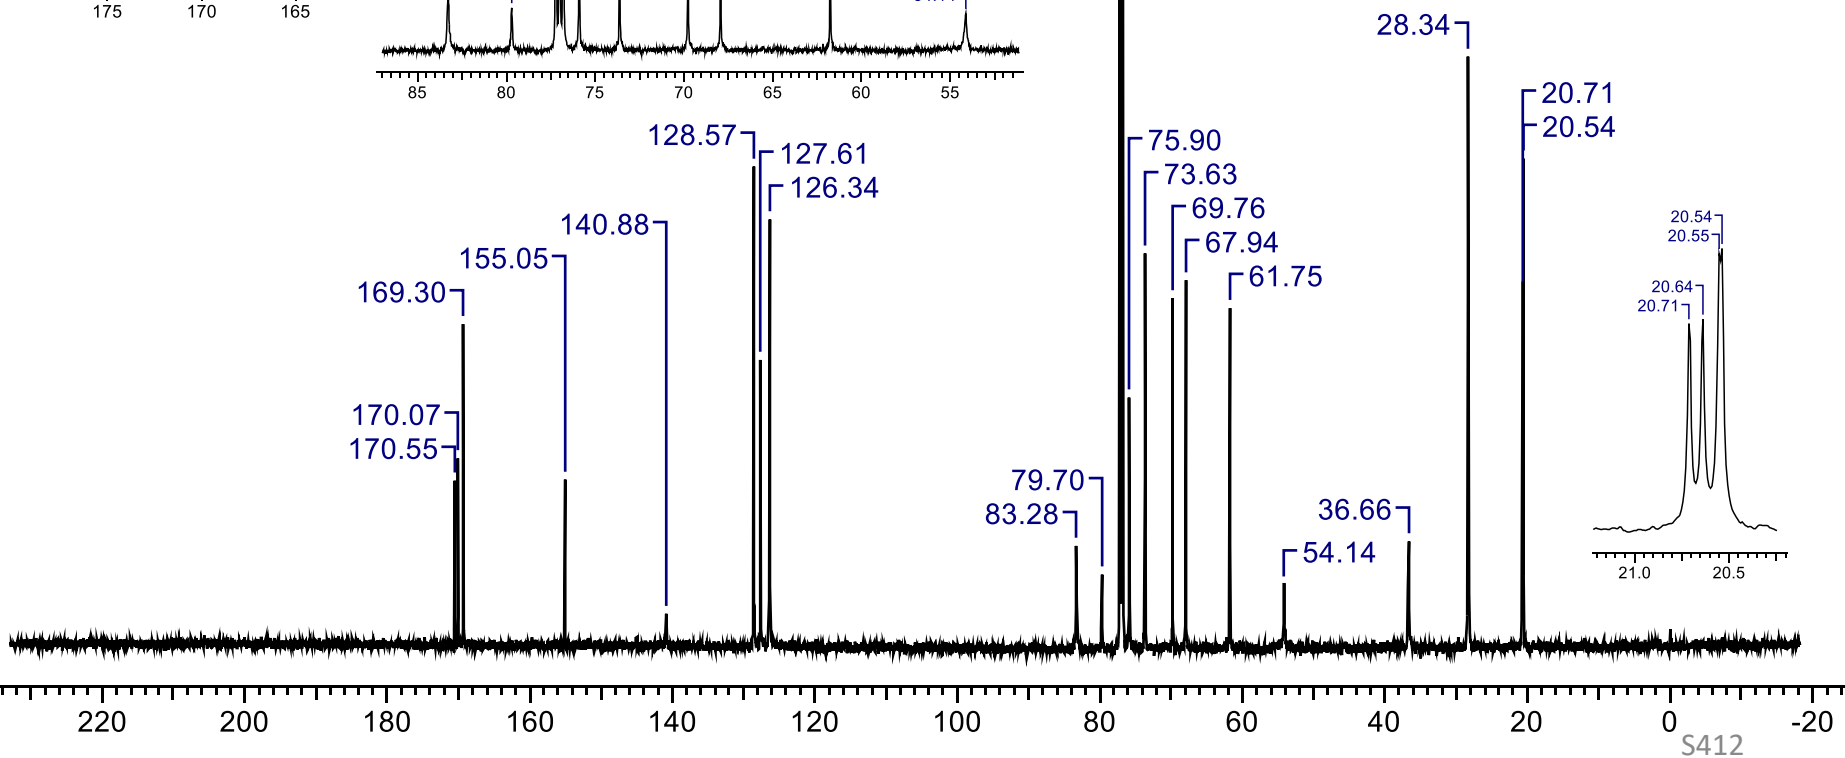

S412

CHCl<sub>3</sub>

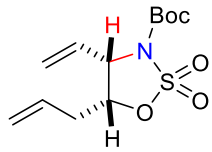

<sup>1</sup>H NMR of N-Boc-2v, 600 MHz, CDCl<sub>3</sub>

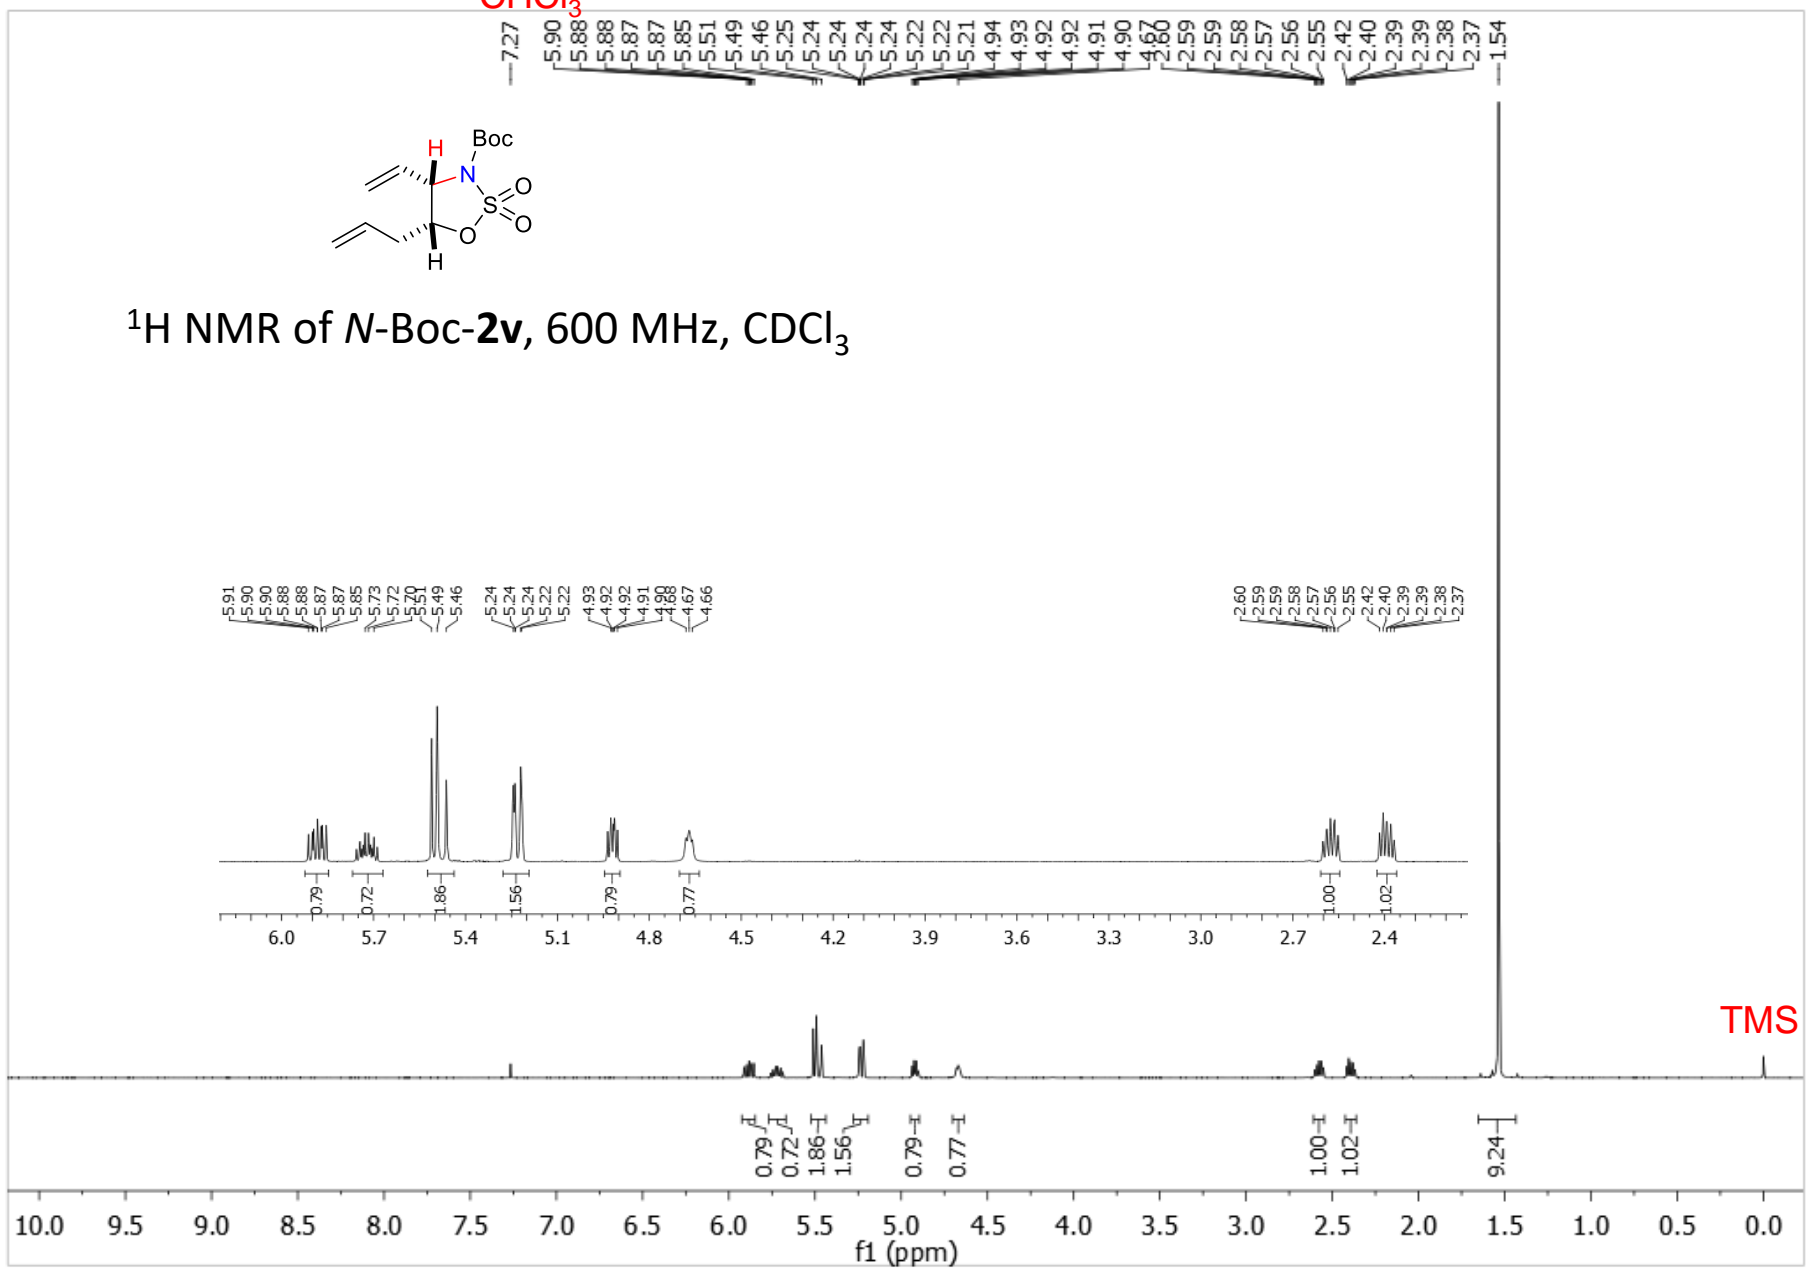

TMS

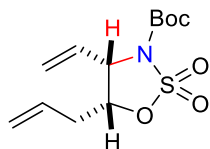

$^{13}\text{C}$  NMR of *N*-Boc-2v, 150 MHz,  $\text{CDCl}_3$

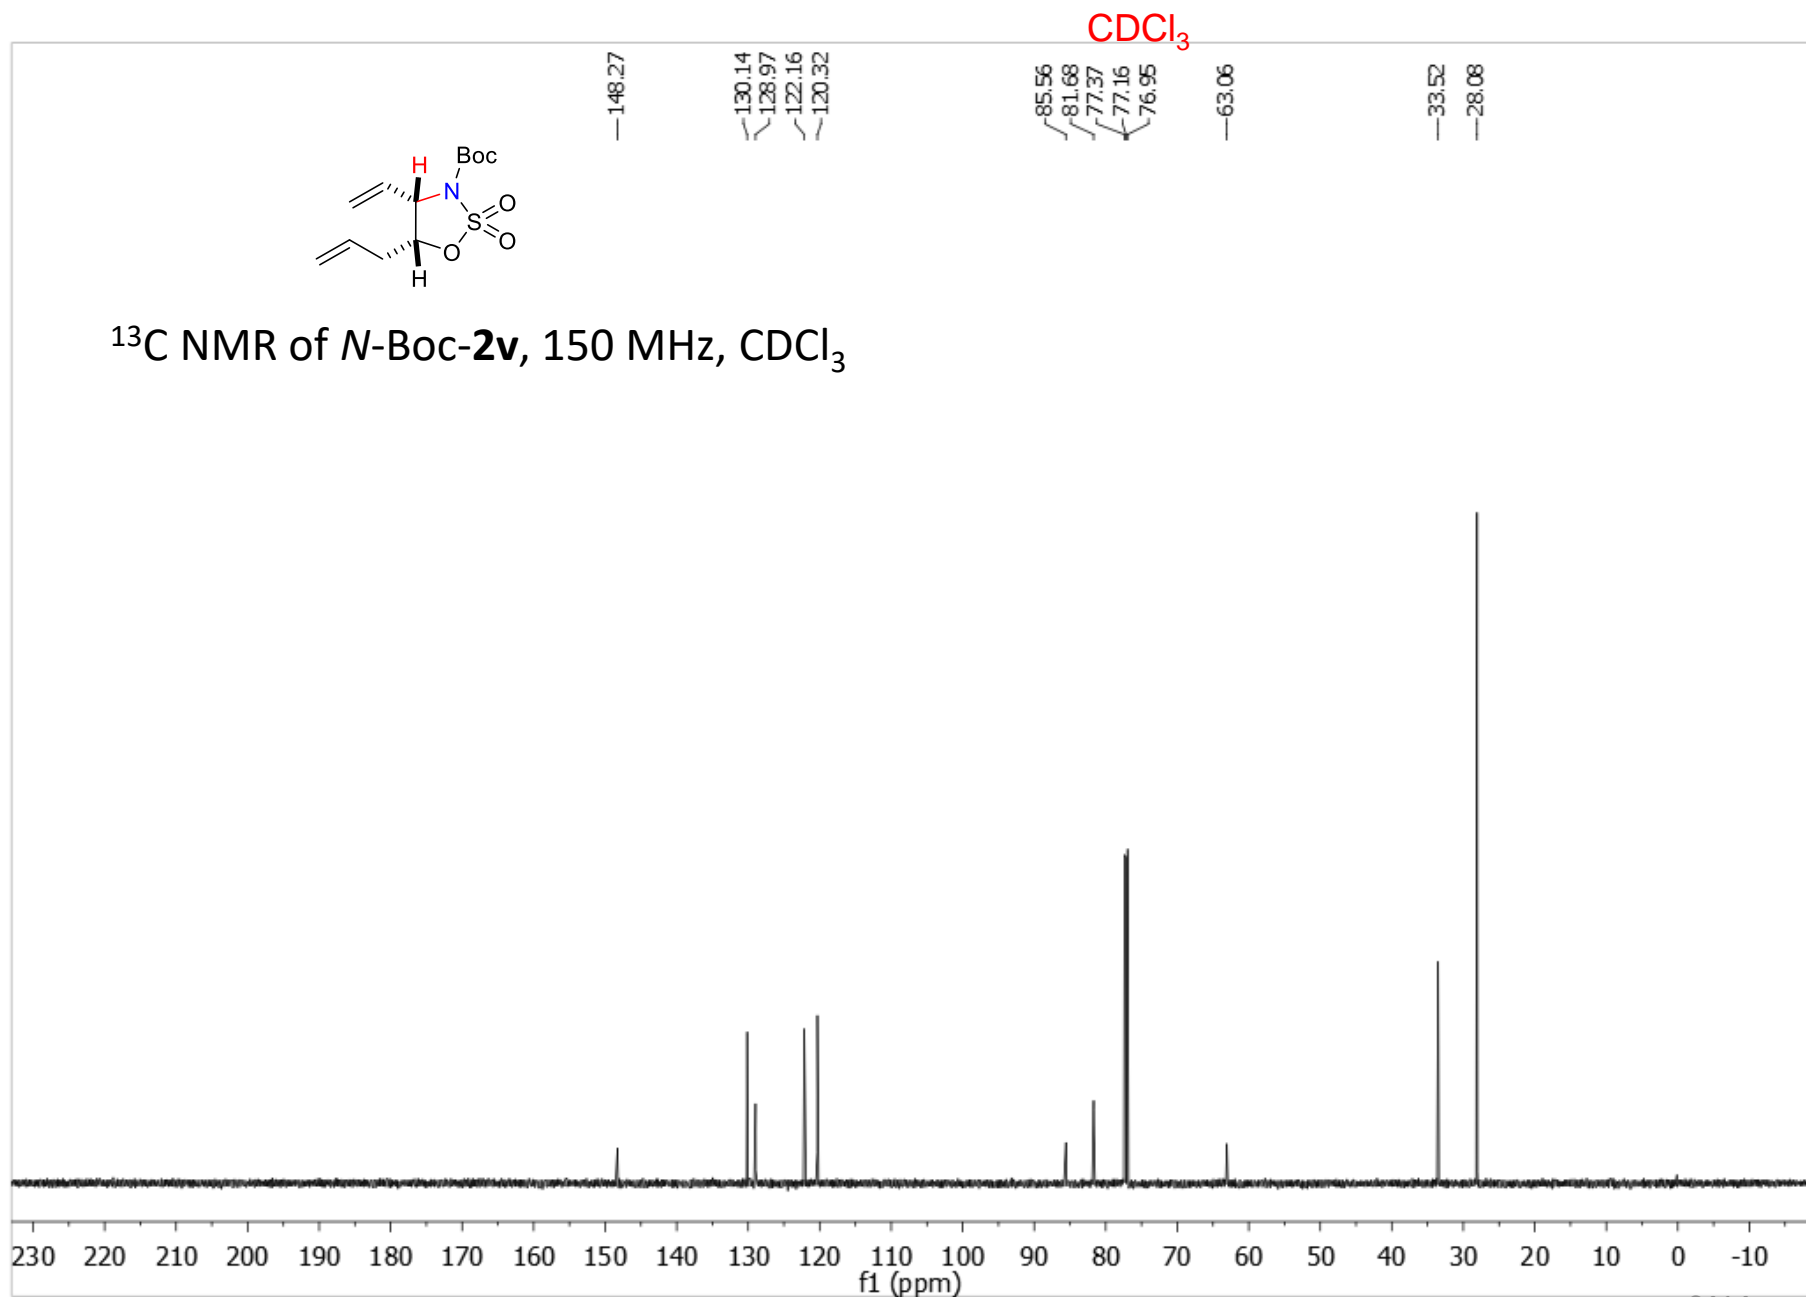

CHCl<sub>3</sub>

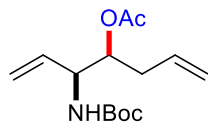

<sup>1</sup>H NMR of **3r**, 600 MHz, CDCl<sub>3</sub>

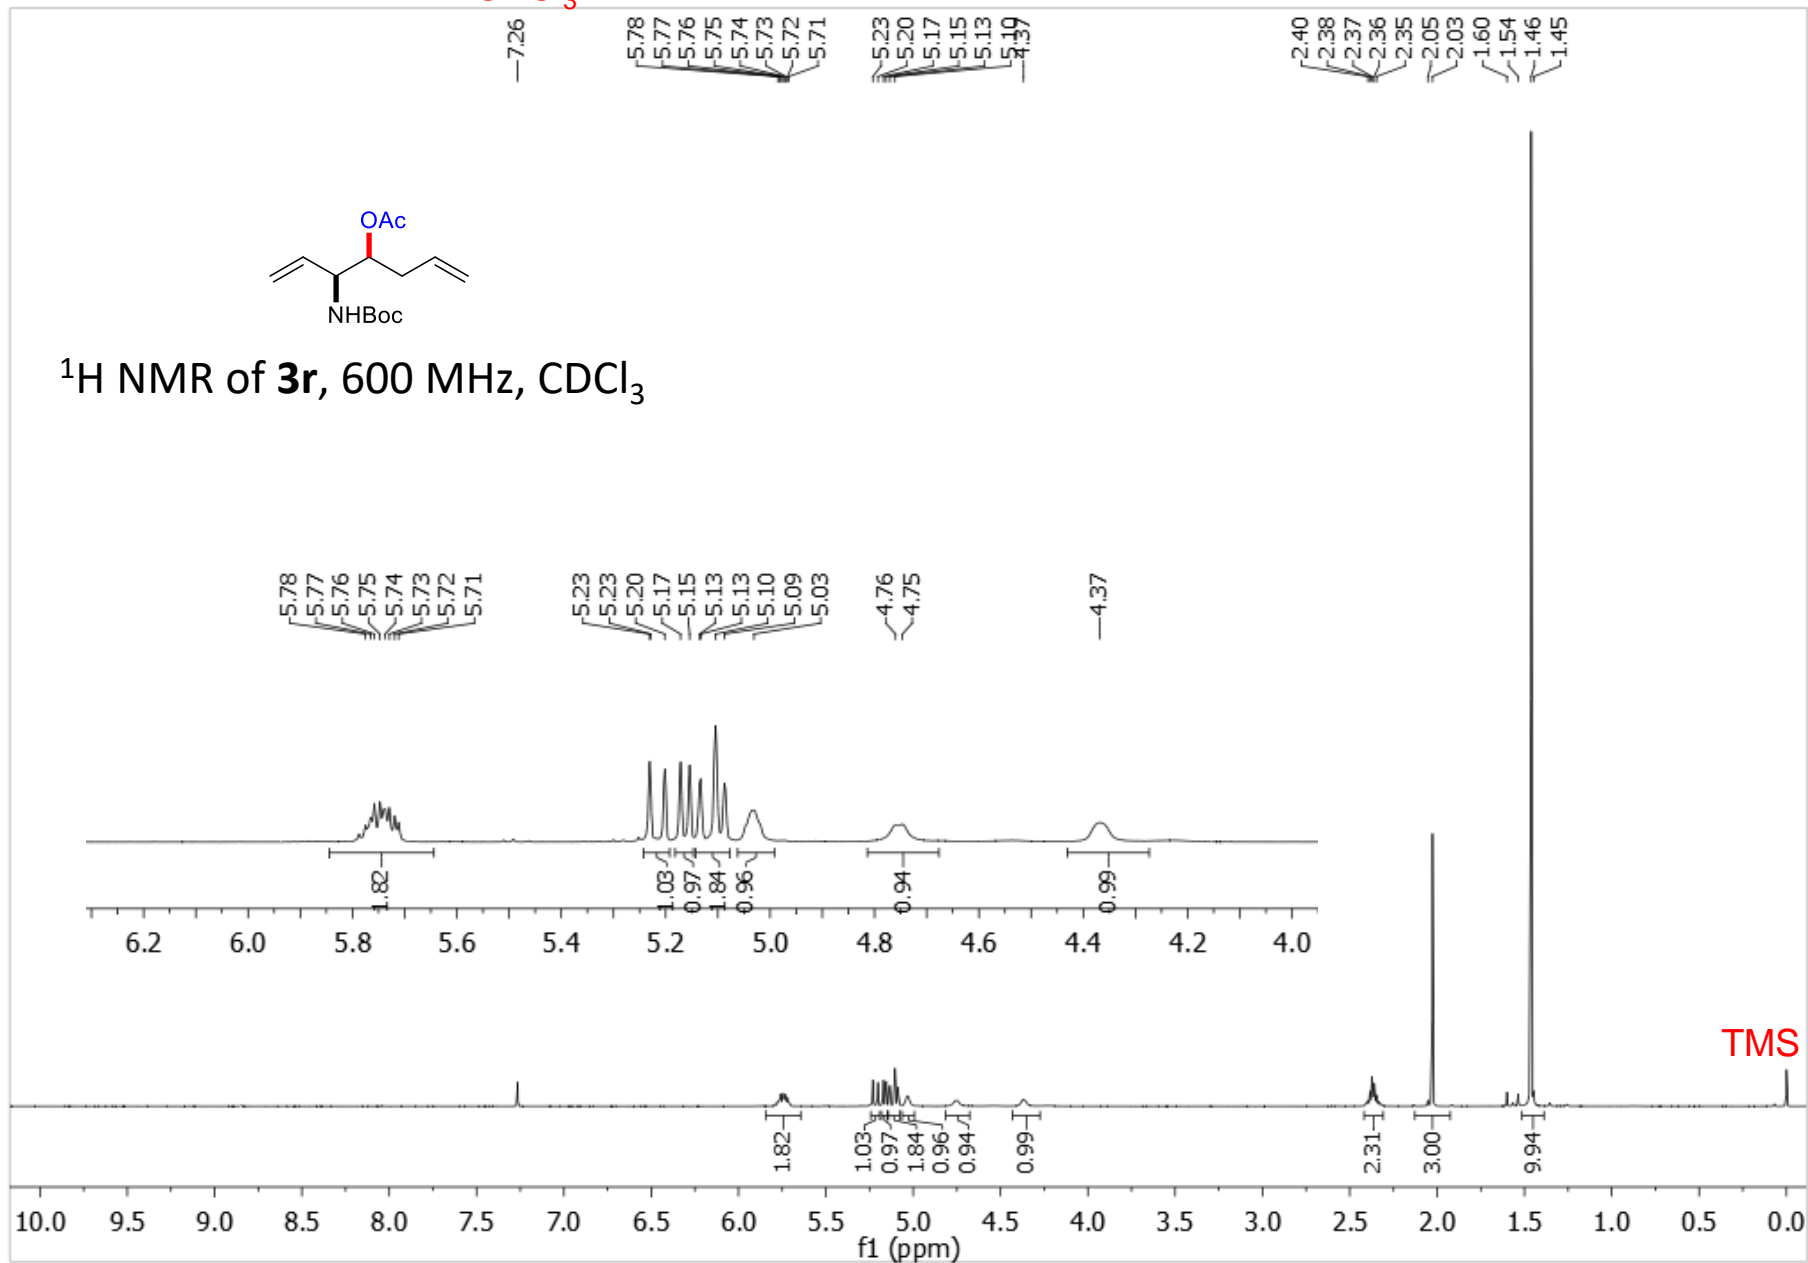

TMS



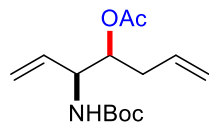

$^{13}\text{C}$  NMR of **3r**, 150 MHz,  $\text{CDCl}_3$

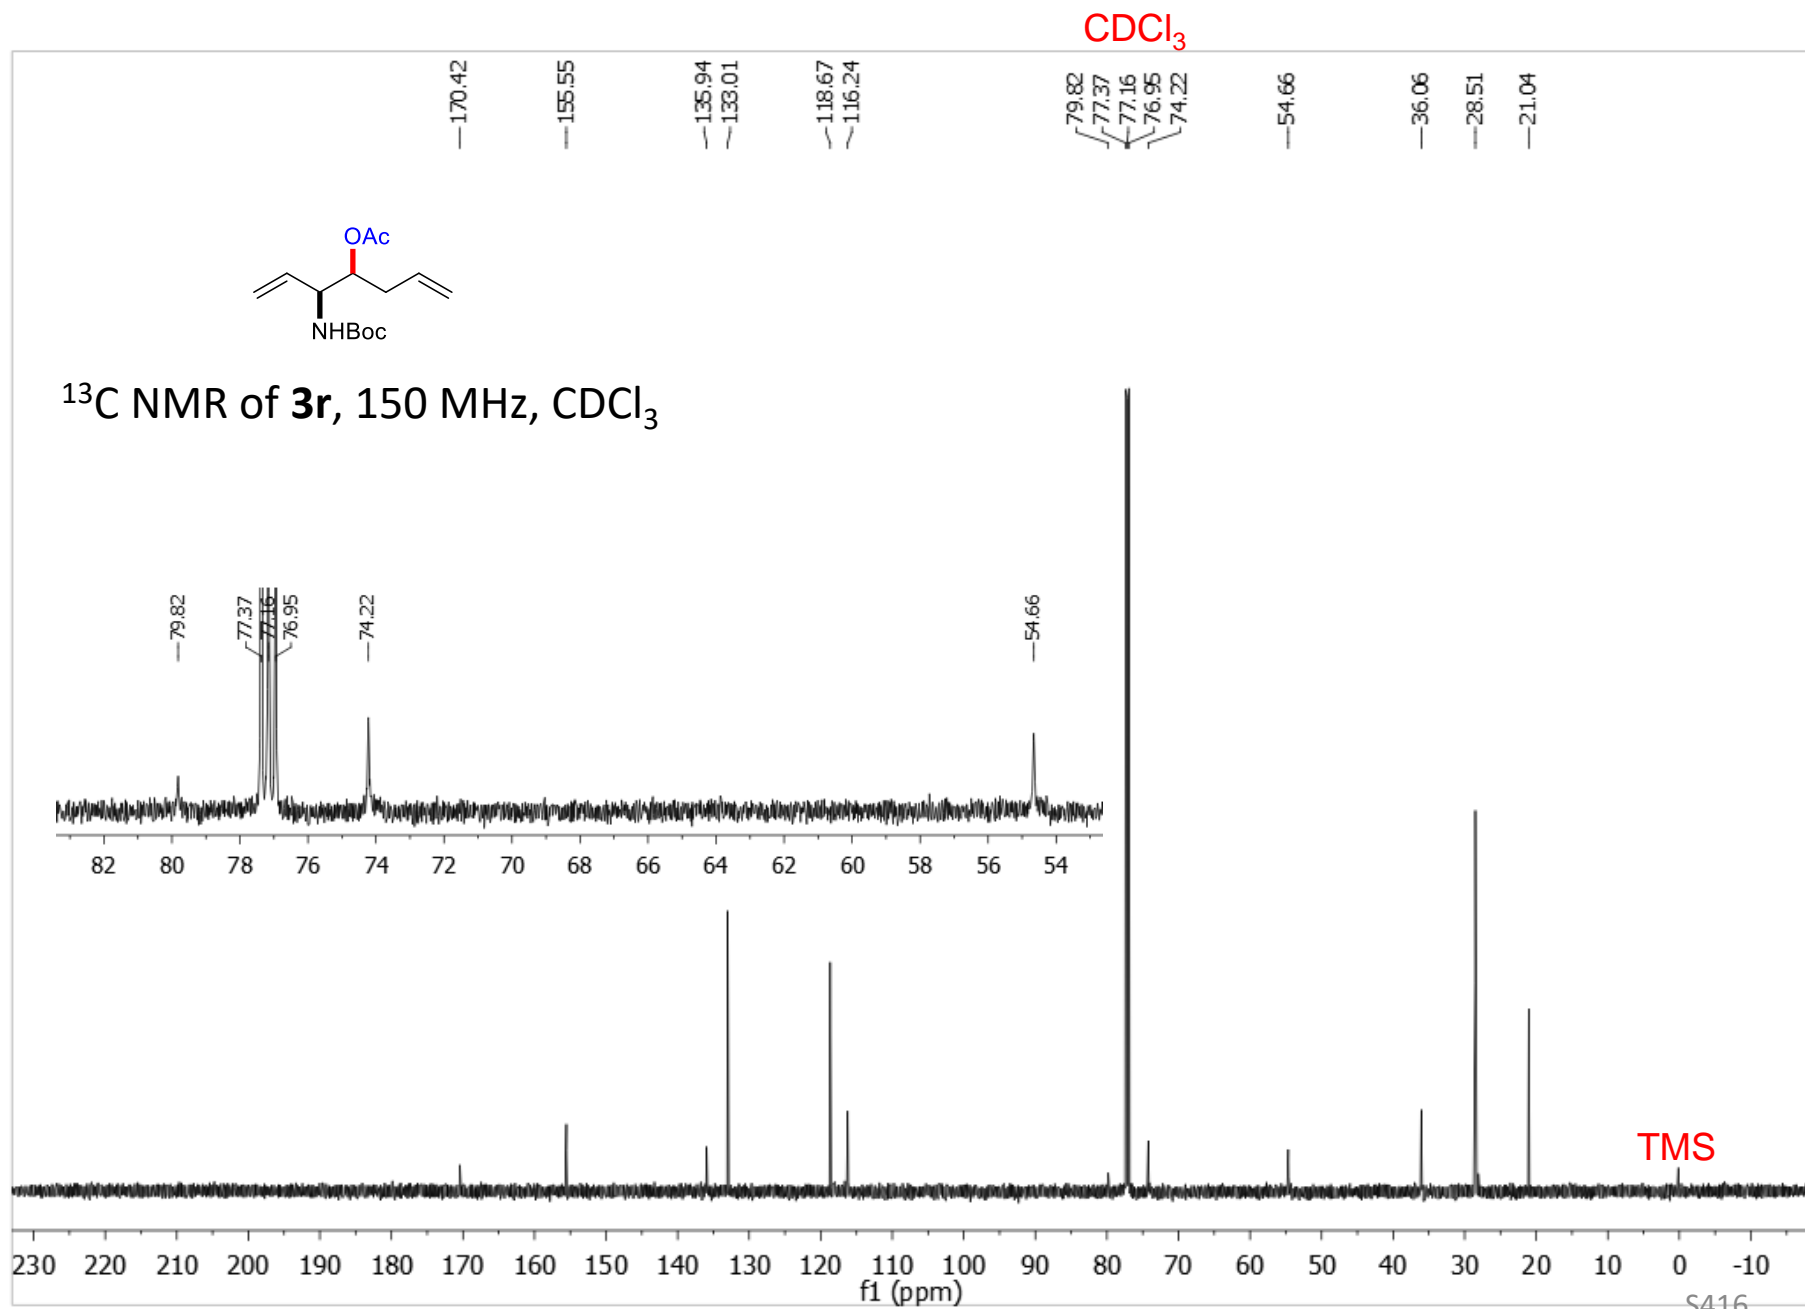

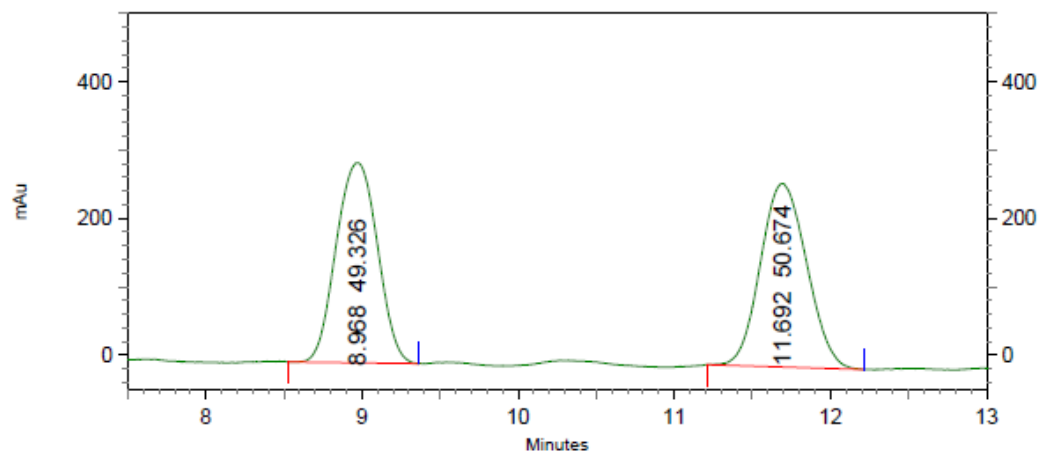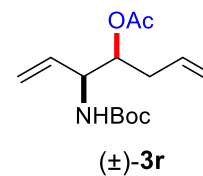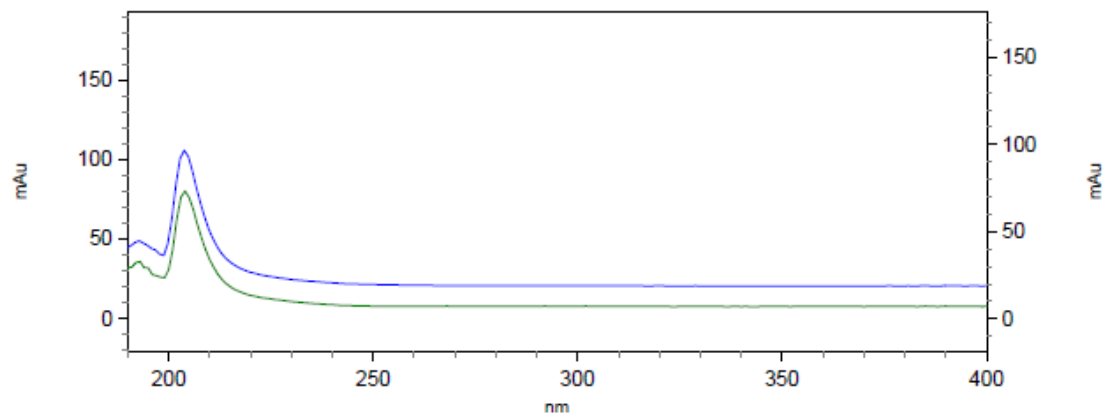

4: 206 nm, 4  
nm Results

| Pk # | Retention Time | Area Percent |
|------|----------------|--------------|
| 1    | 8.968          | 49.326       |
| 2    | 11.692         | 50.674       |

|        |  |         |
|--------|--|---------|
| Totals |  | 100.000 |
|--------|--|---------|

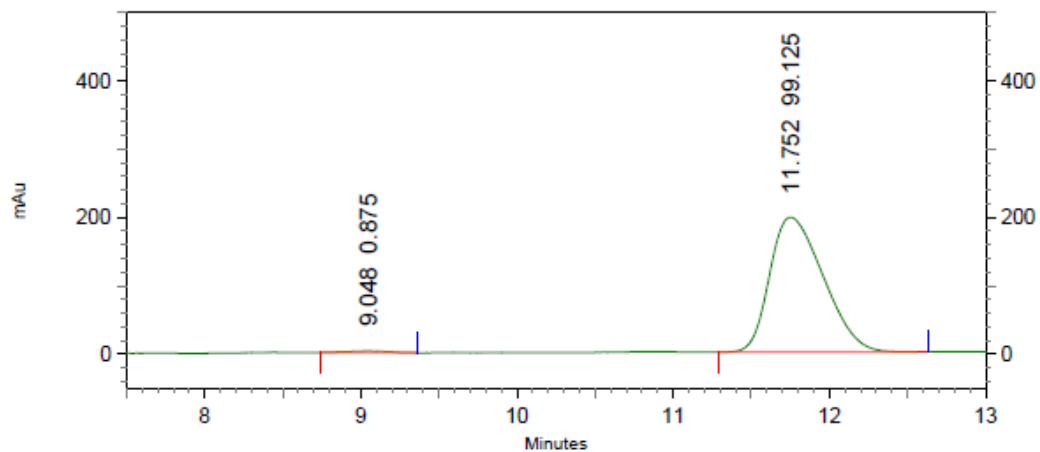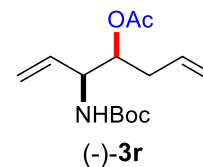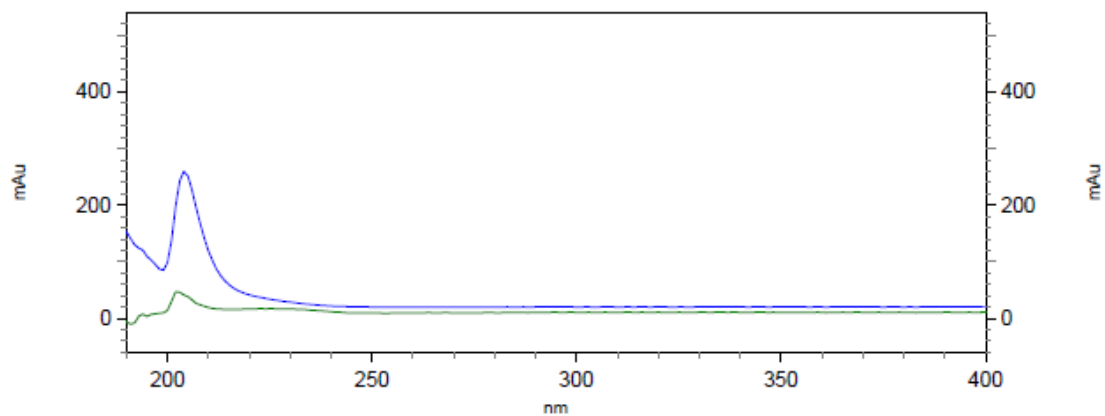

4: 206 nm, 4  
nm Results

| Pk # | Retention Time | Area Percent |
|------|----------------|--------------|
| 1    | 9.048          | 0.875        |
| 2    | 11.752         | 99.125       |

|        |  |         |
|--------|--|---------|
| Totals |  | 100.000 |
|--------|--|---------|

CHCl<sub>3</sub>

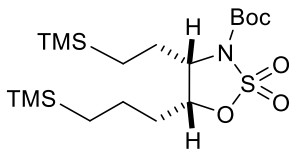

<sup>1</sup>H NMR of *N*-Boc-8H-2w, 500 MHz, CDCl<sub>3</sub>

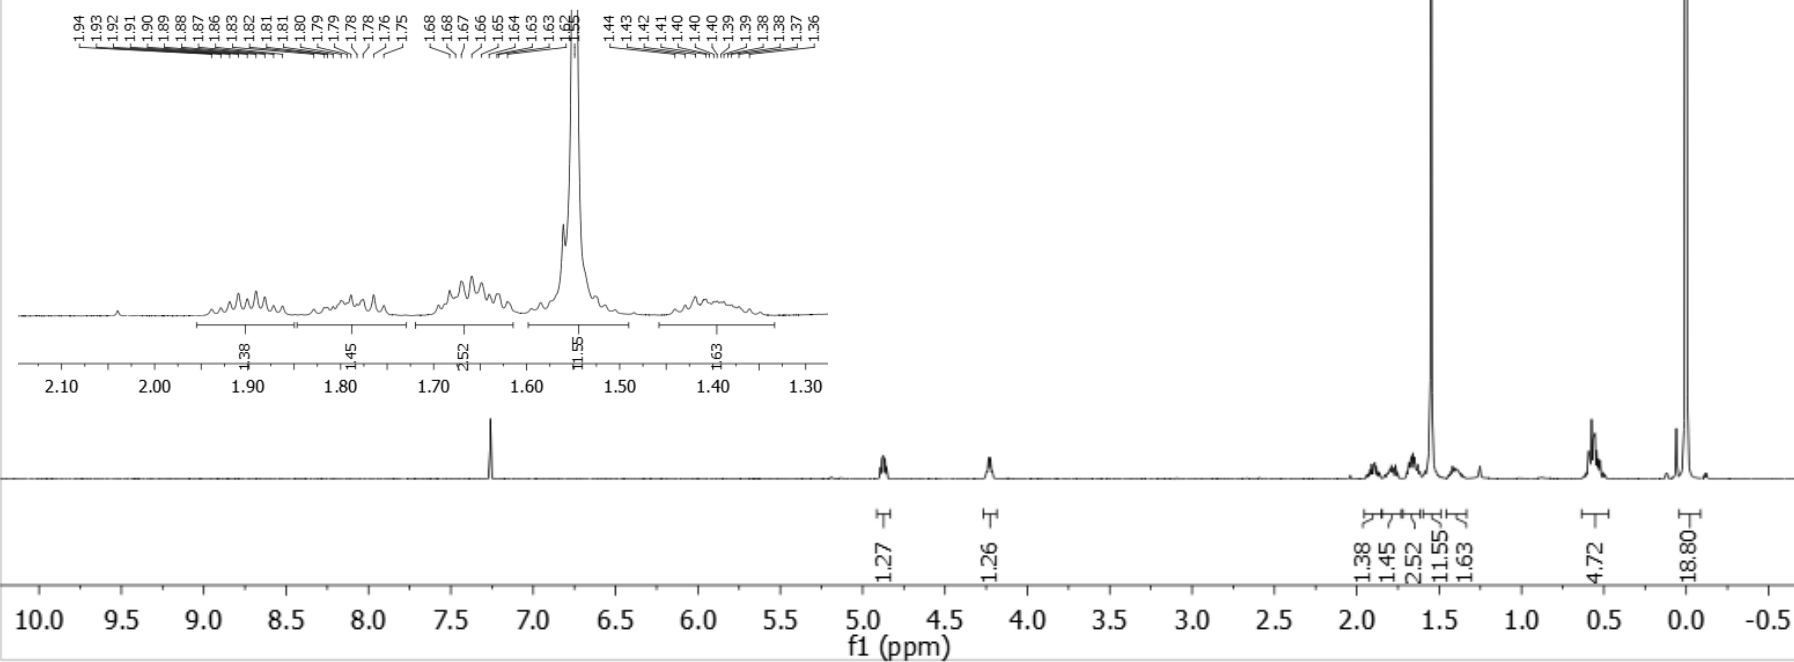

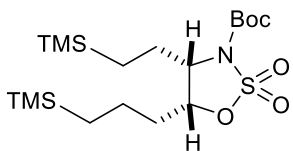

$^{13}\text{C}$  NMR of *N*-Boc-8*H*-2*w*, 150 MHz,  $\text{CDCl}_3$

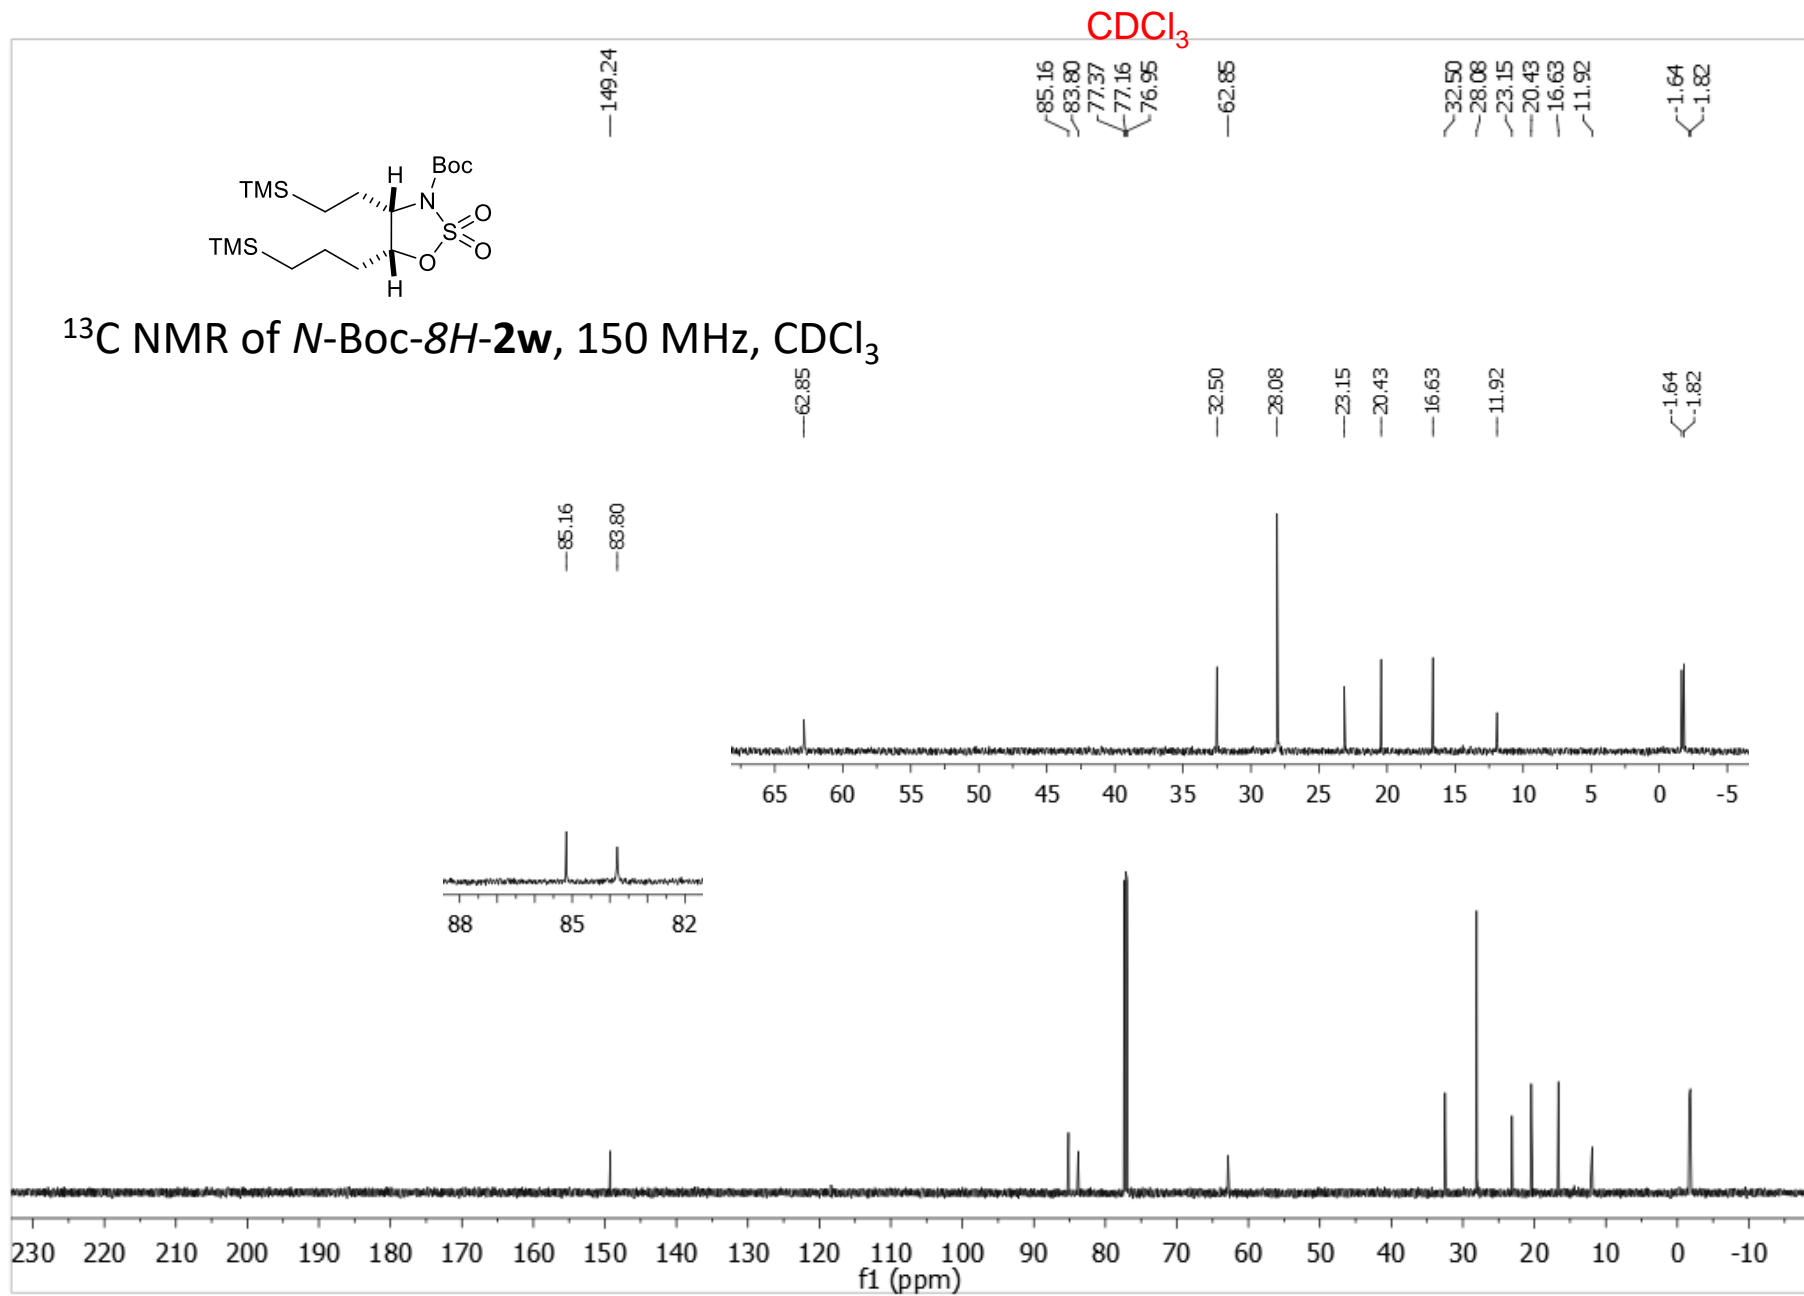

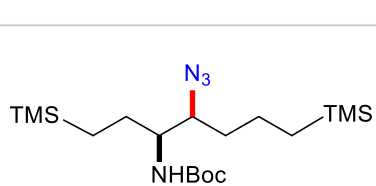

CHCl<sub>3</sub>

-7.26

<sup>1</sup>H NMR of **3s**, 500 MHz, CDCl<sub>3</sub>

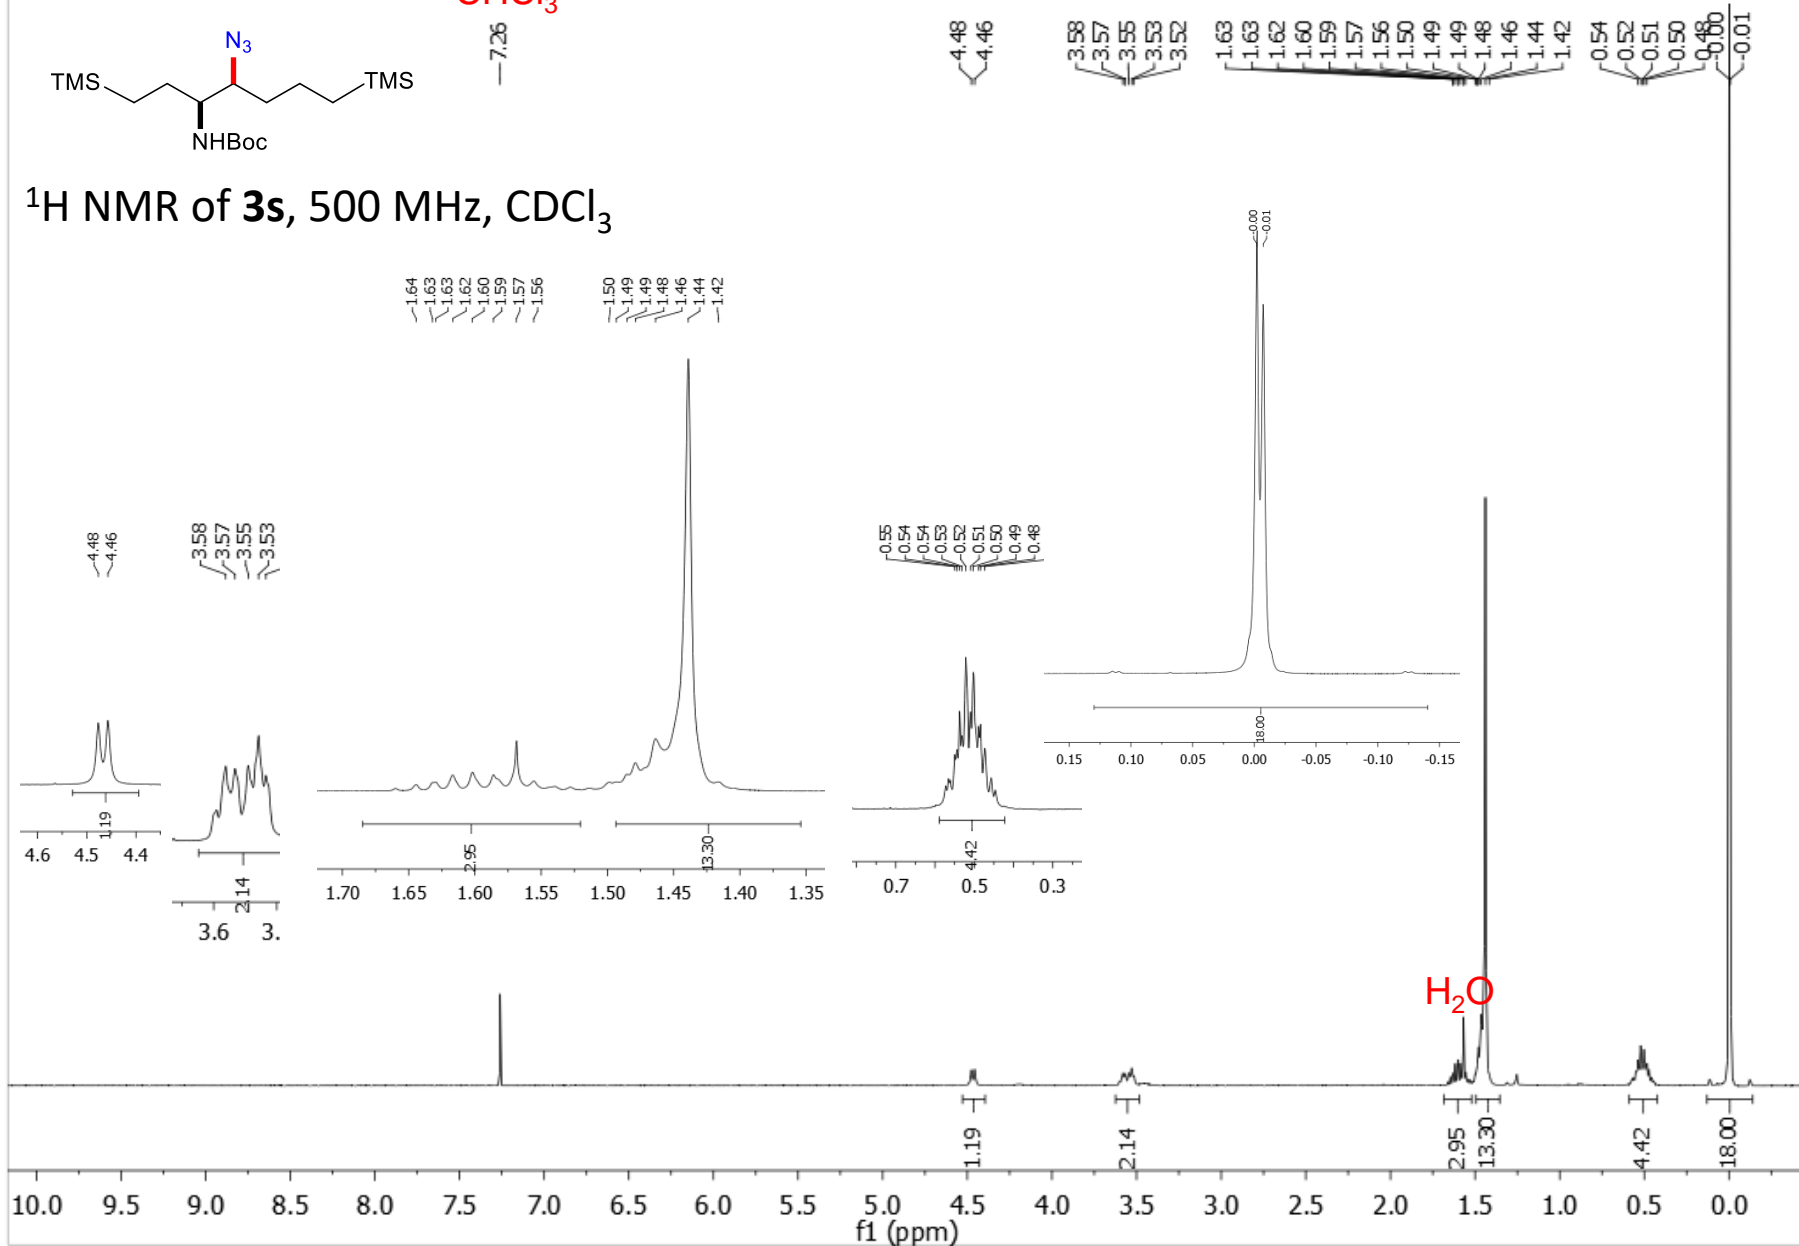

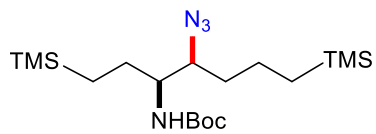

CDCl<sub>3</sub>

<sup>13</sup>C NMR of **3s**, 150 MHz, CDCl<sub>3</sub>

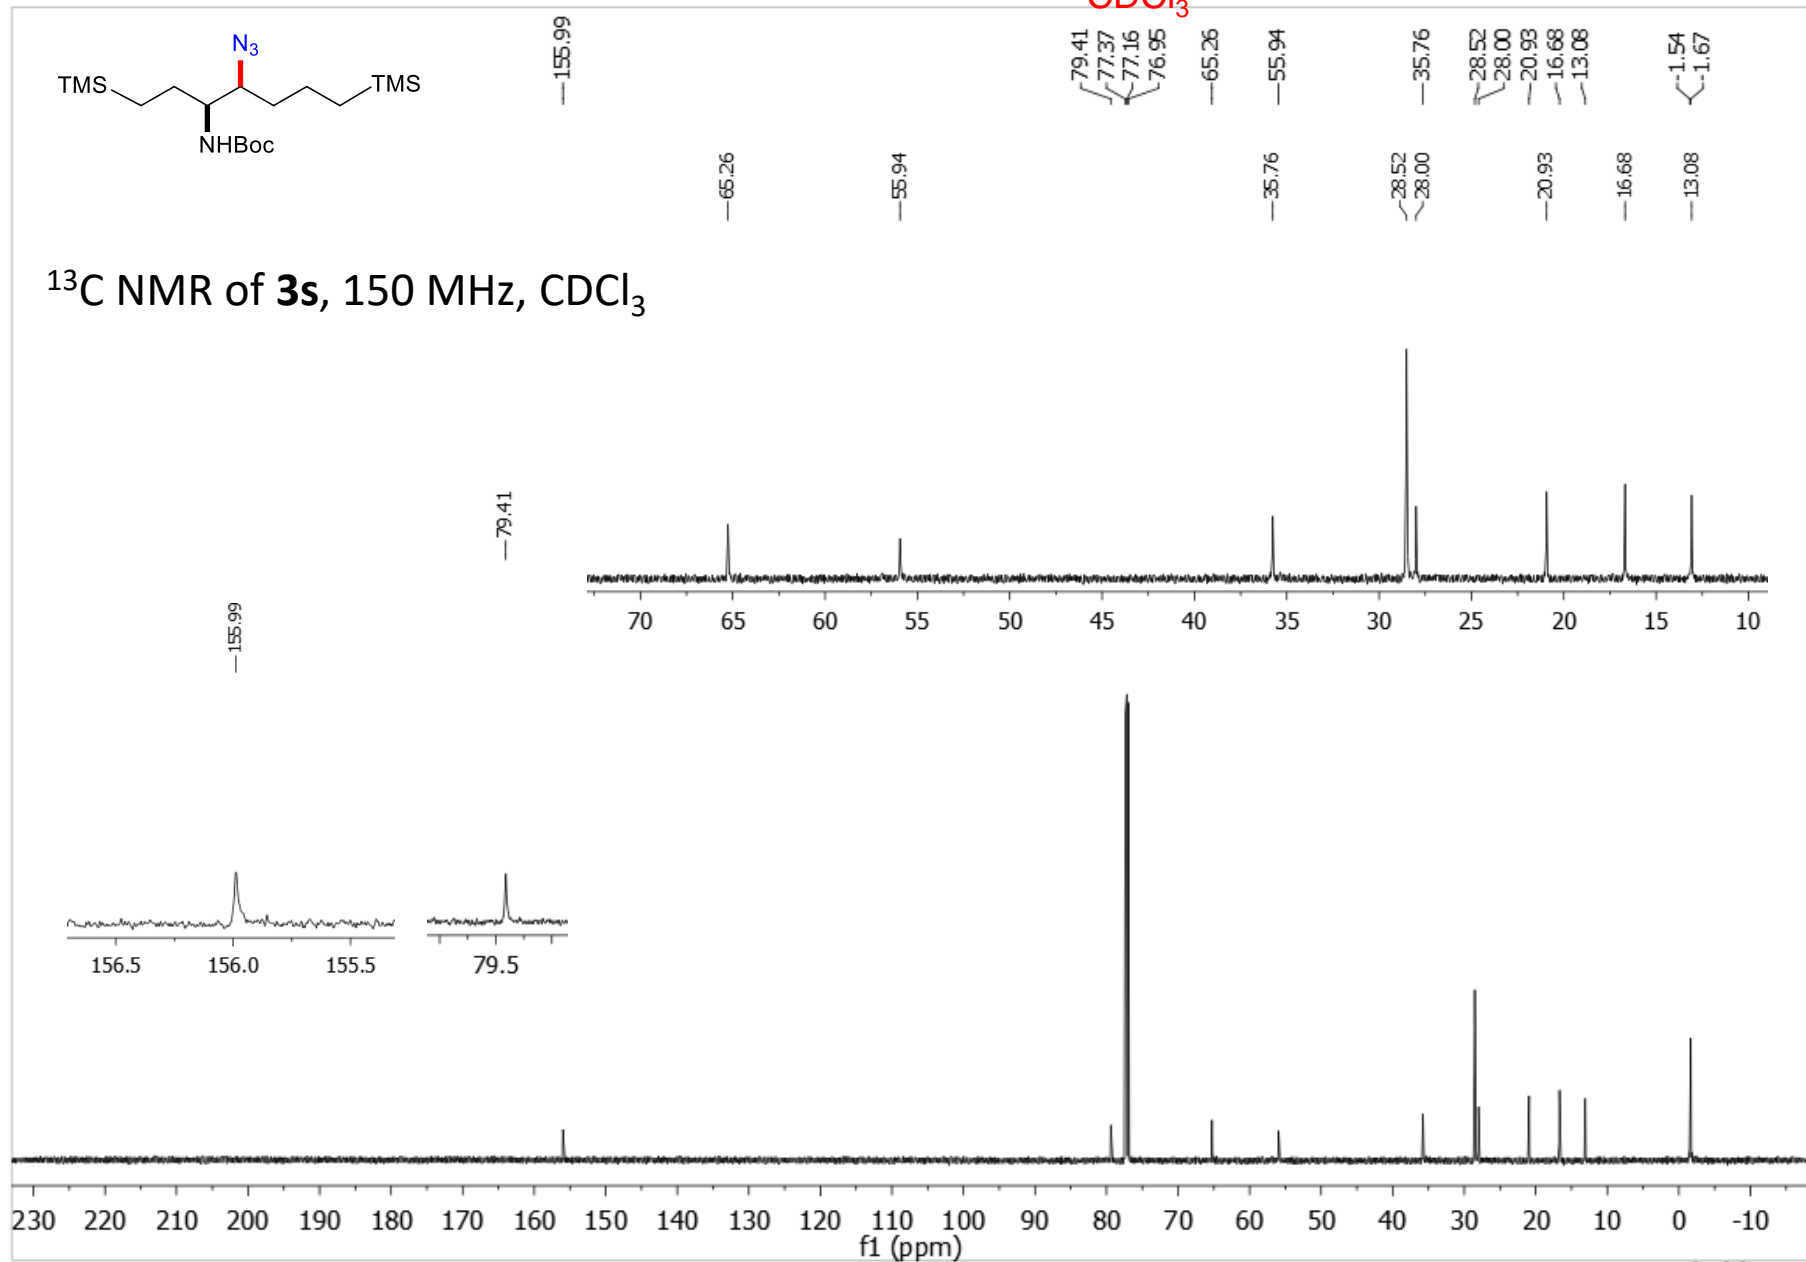

$\text{CHCl}_3$   $^1\text{H}$  NMR of **3s** with  $\text{Eu}(\text{hfc})_3$ , 600 MHz,  $\text{CDCl}_3$

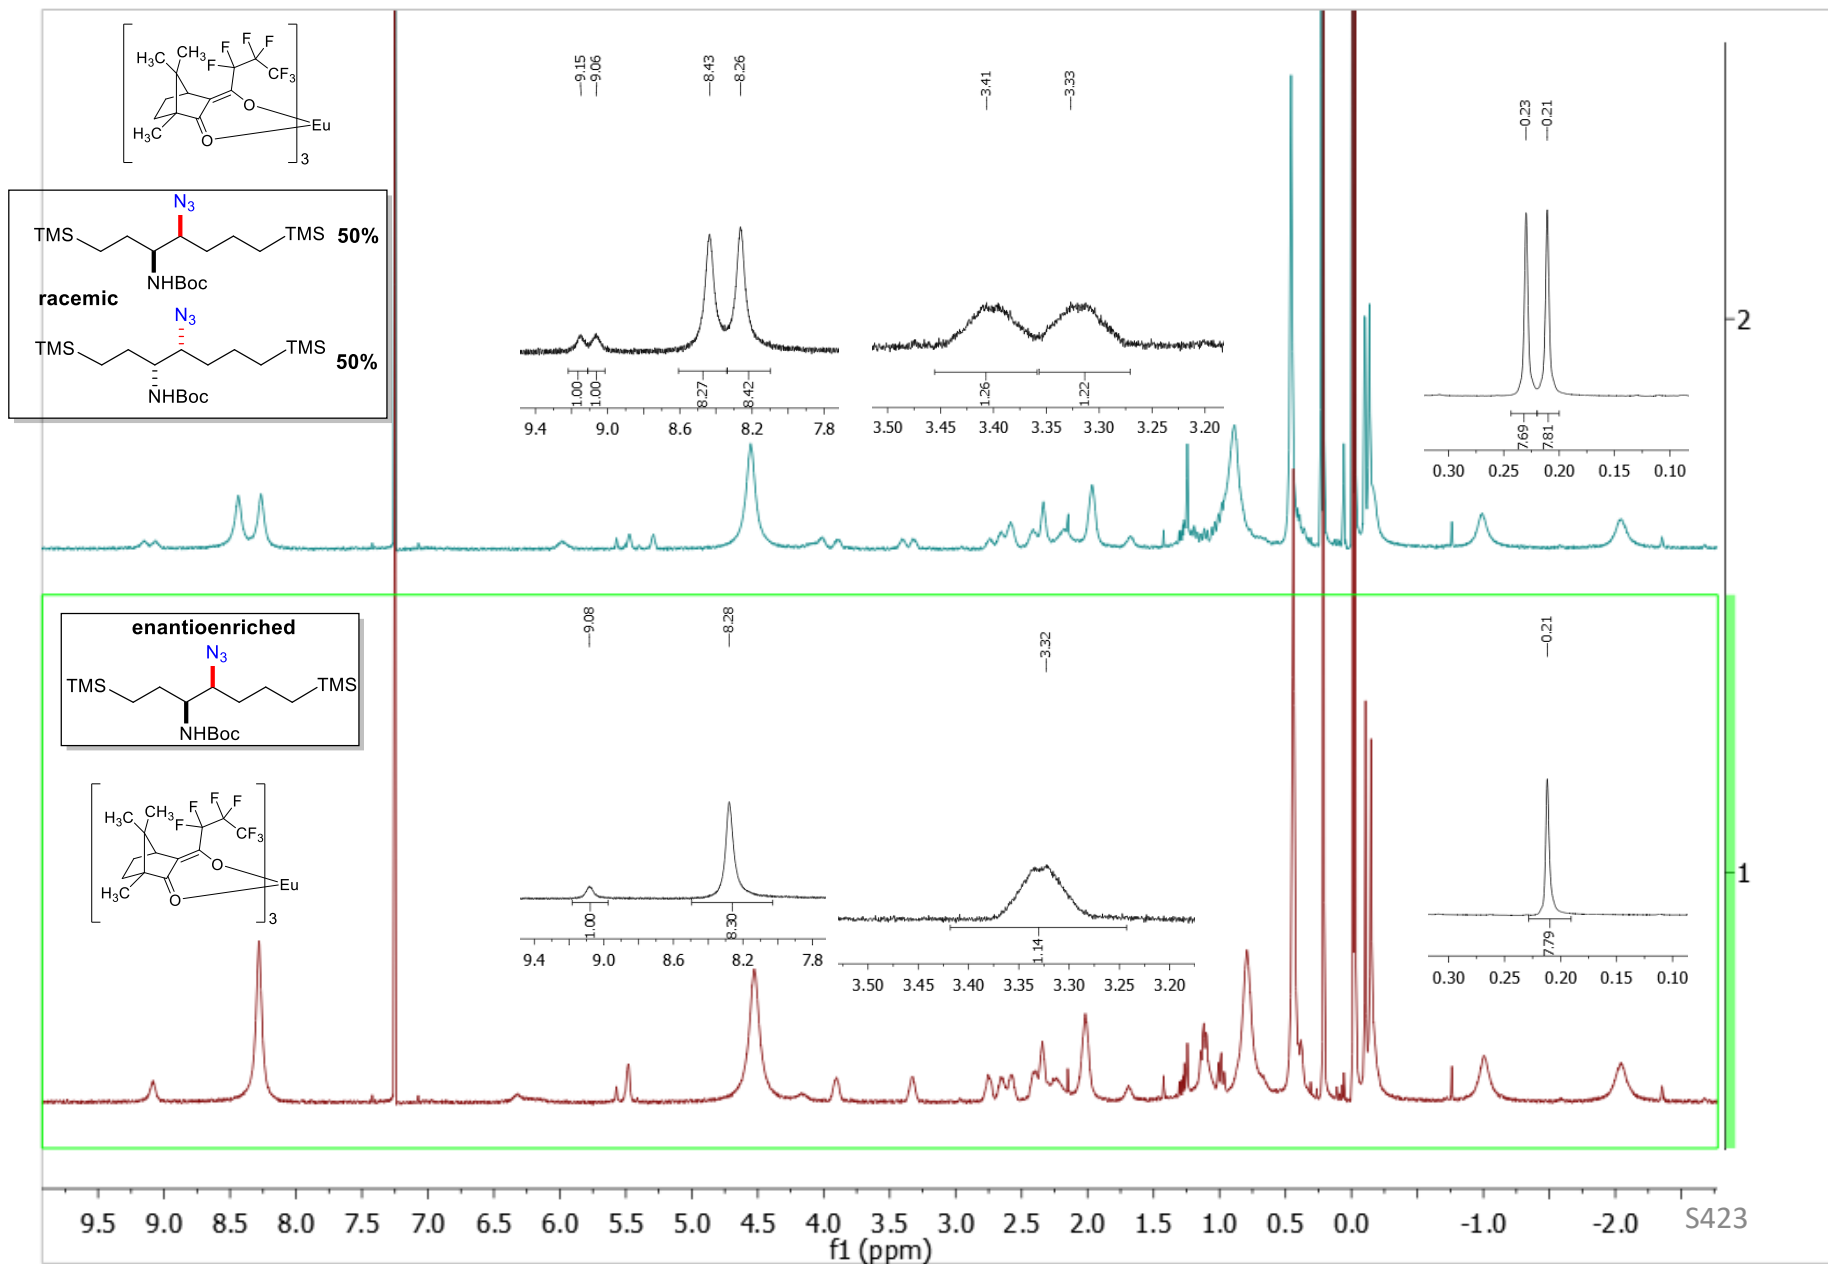



CHCl<sub>3</sub>

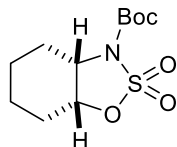

<sup>1</sup>H NMR of *N*-Boc-**2z**, 400 MHz, CDCl<sub>3</sub>

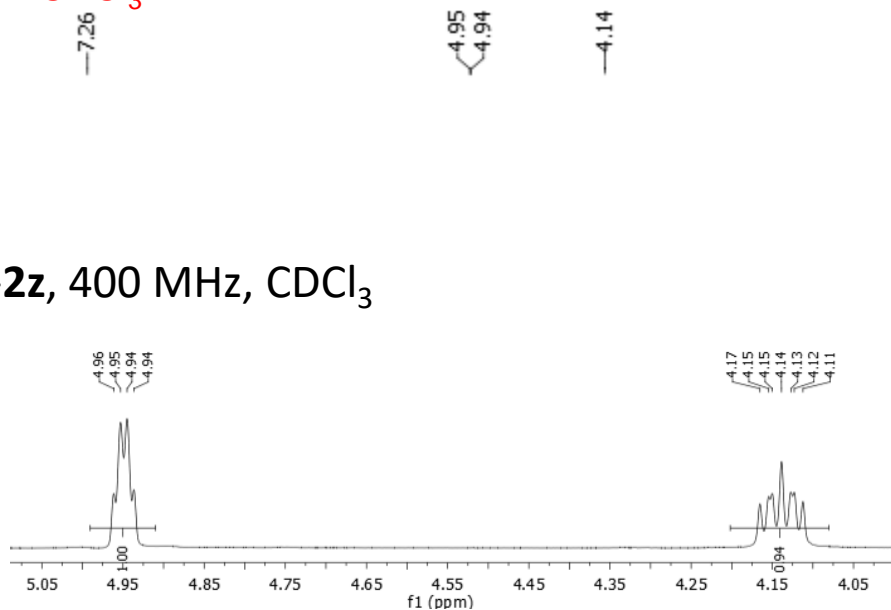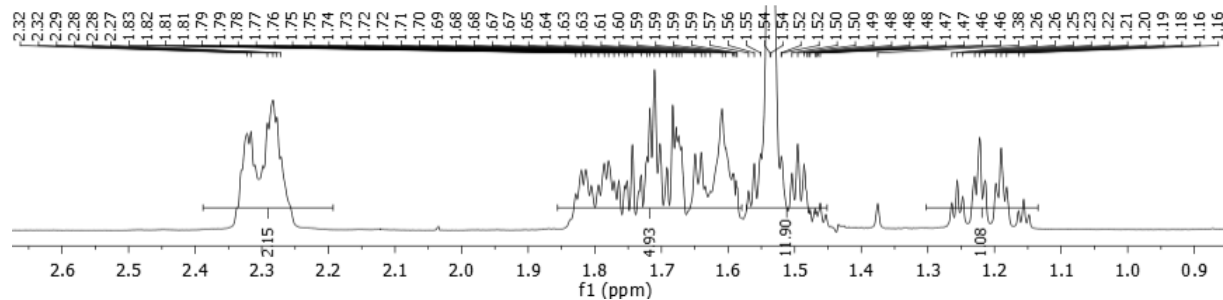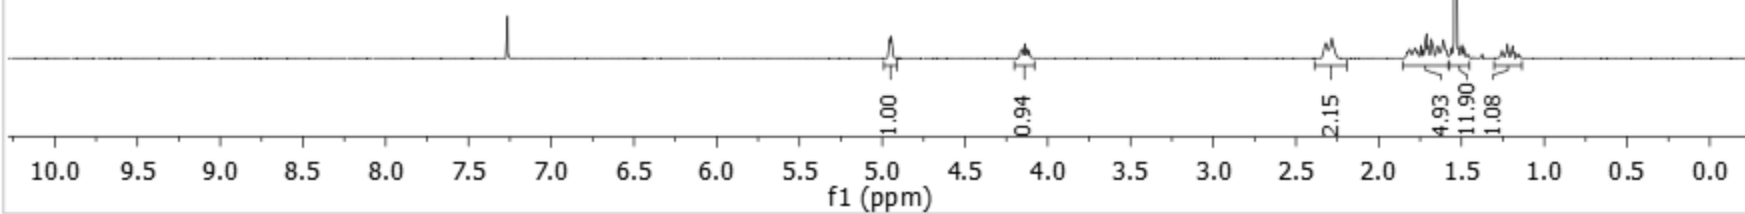

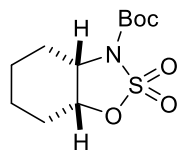

$^{13}\text{C}$  NMR of *N*-Boc-2z, 100 MHz,  $\text{CDCl}_3$

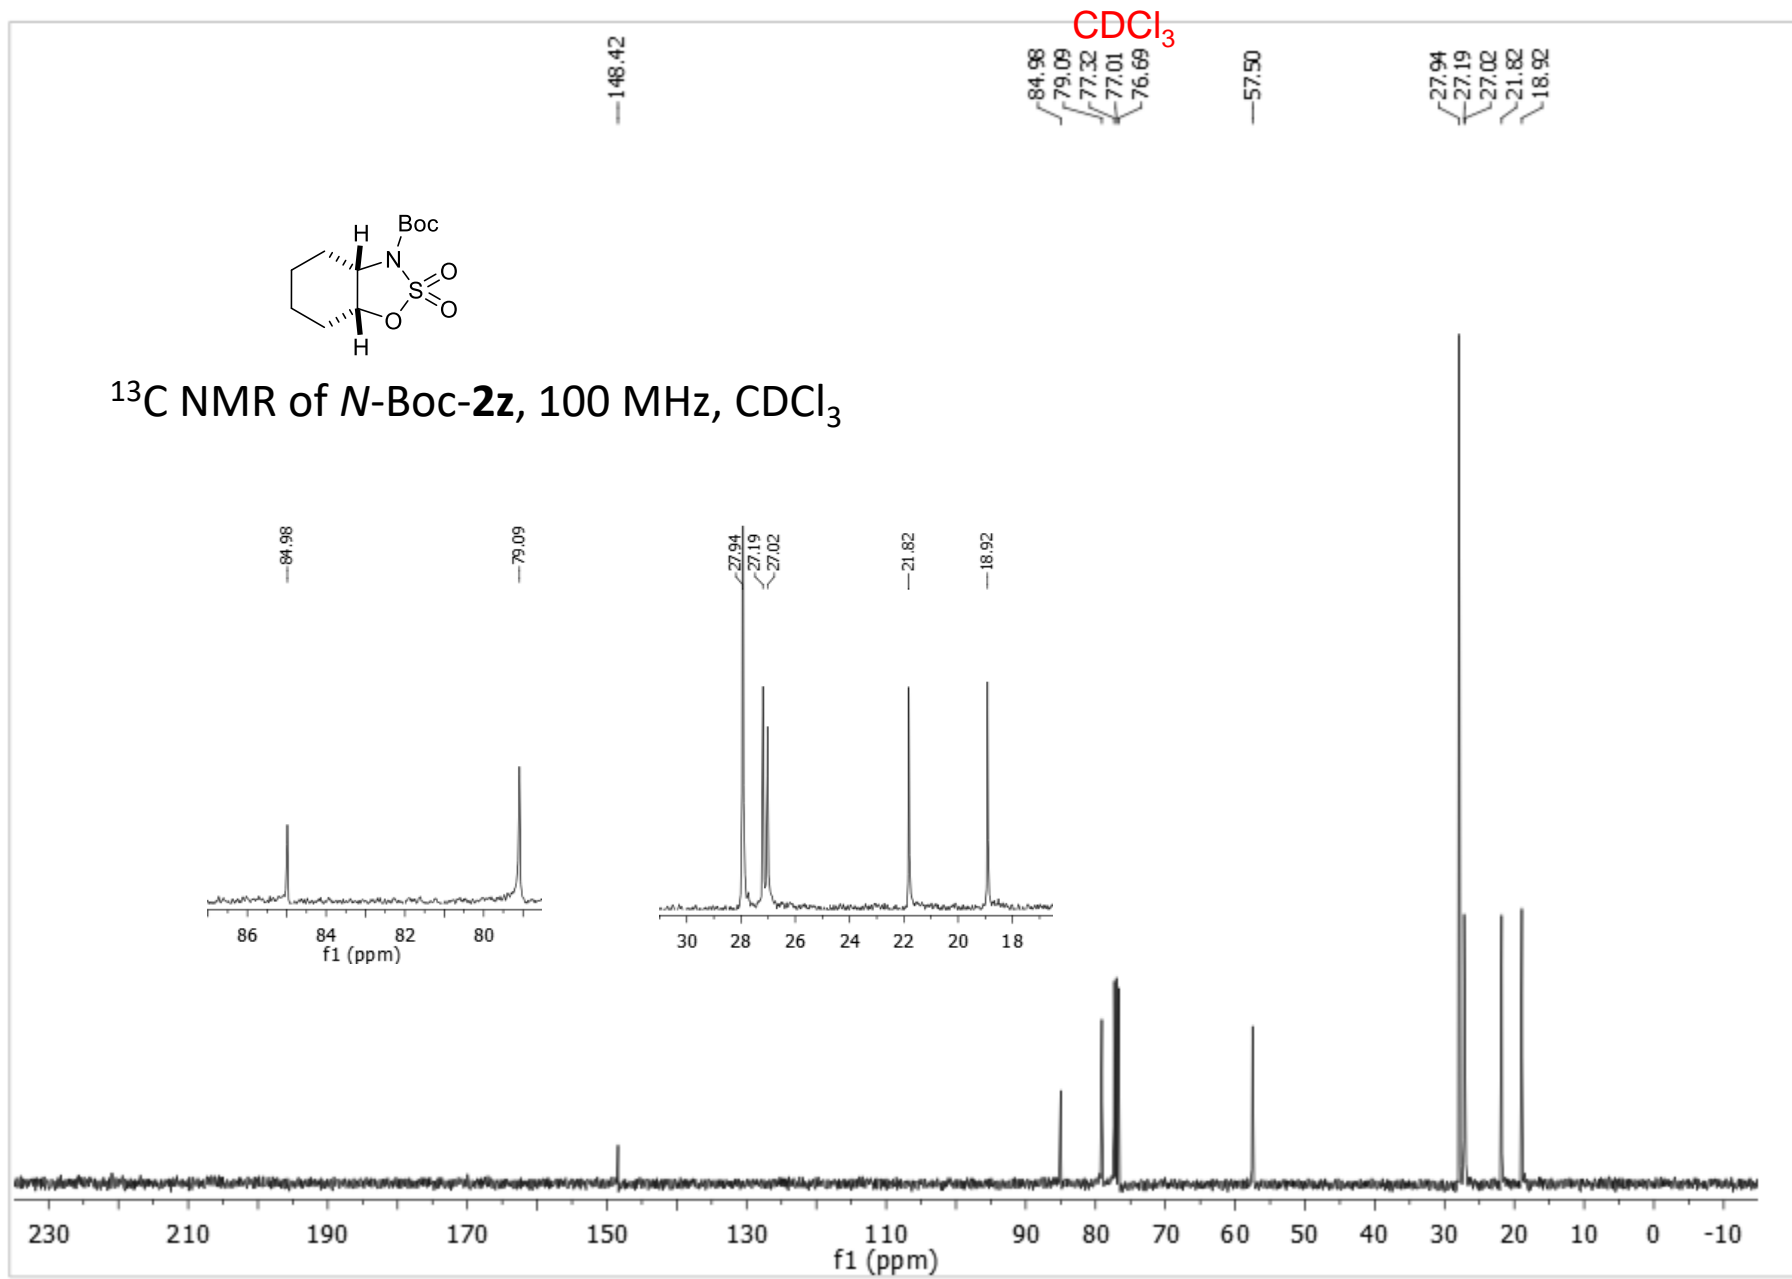



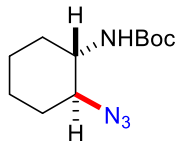

$^{13}\text{C}$  NMR of **3t**, 100 MHz,  $\text{CDCl}_3$

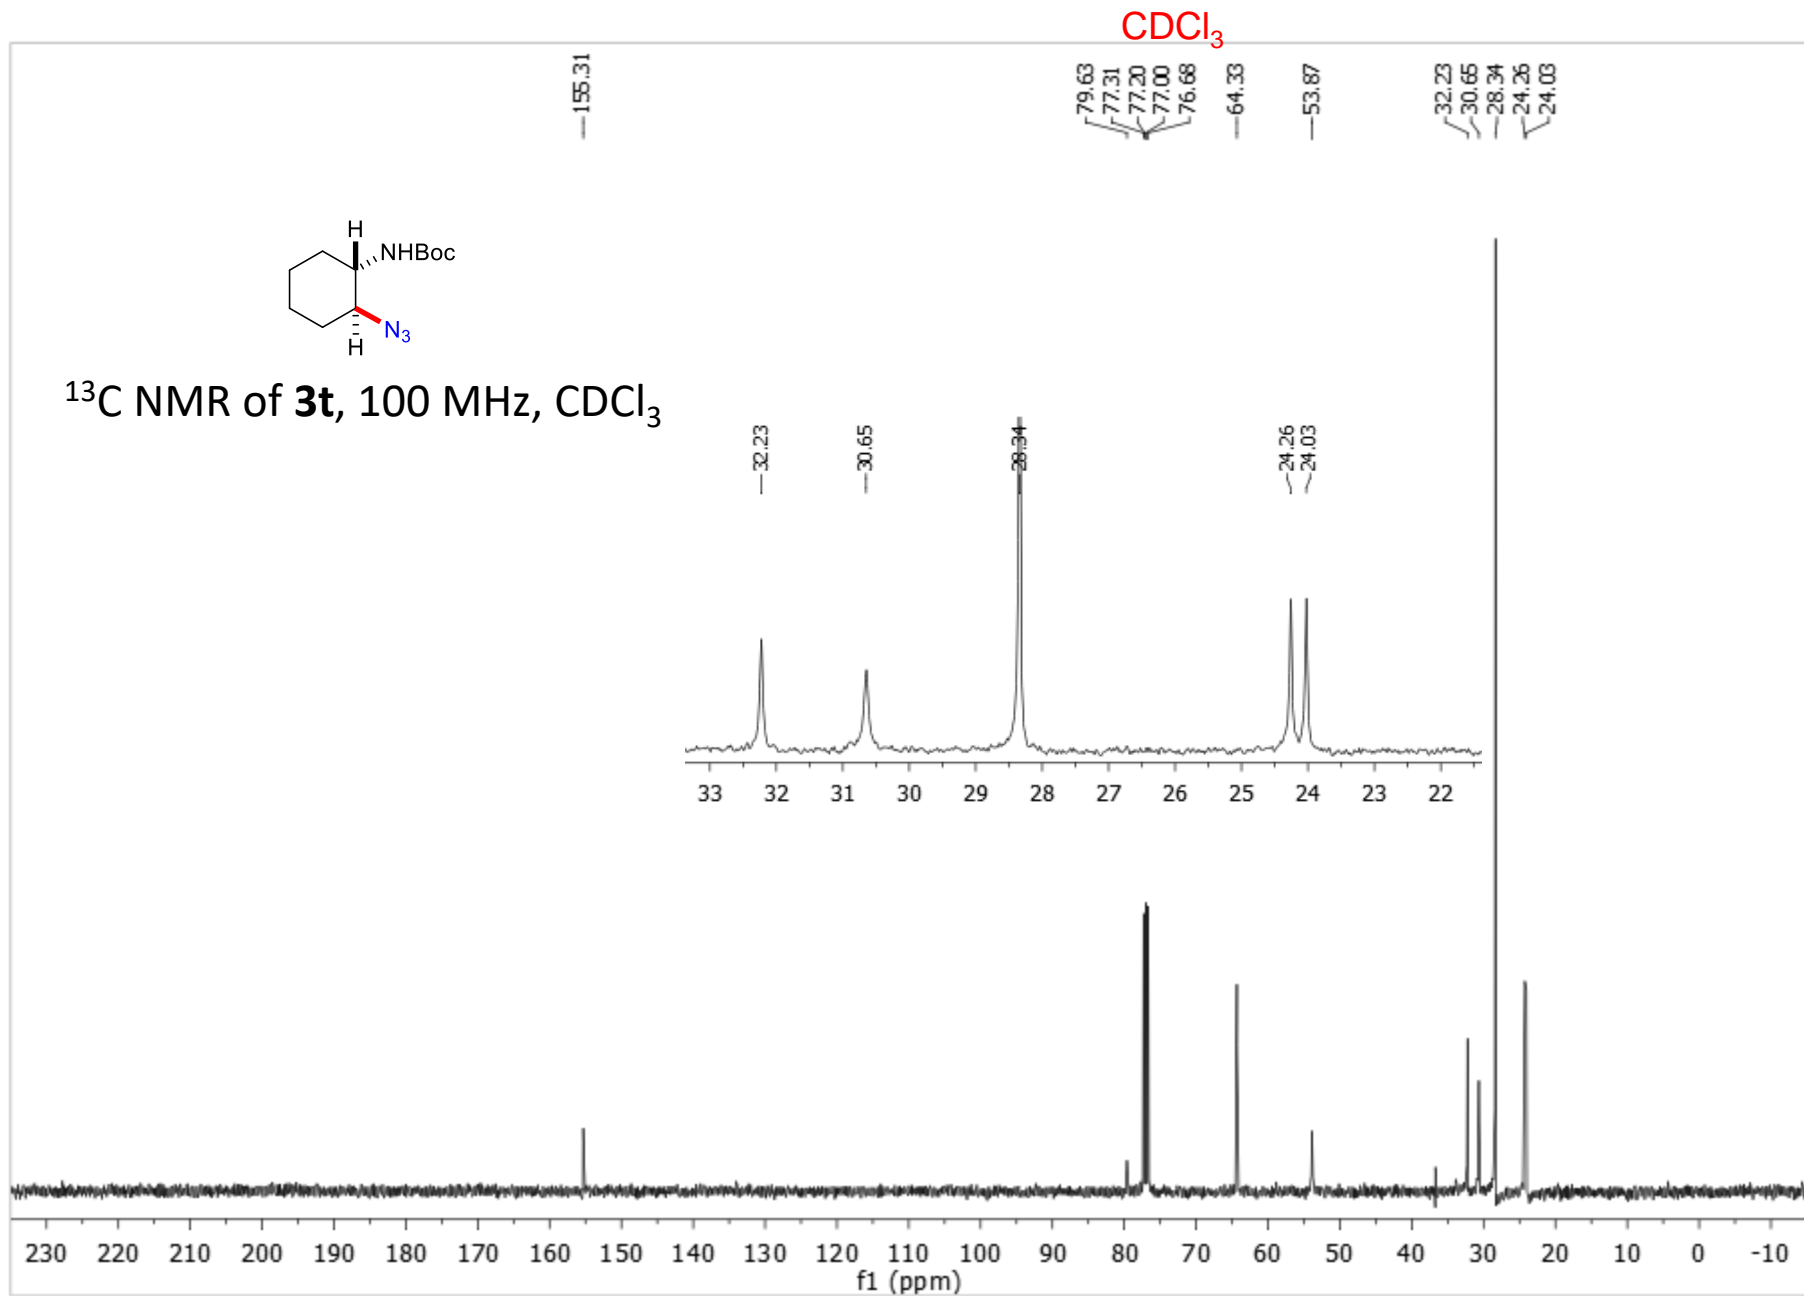

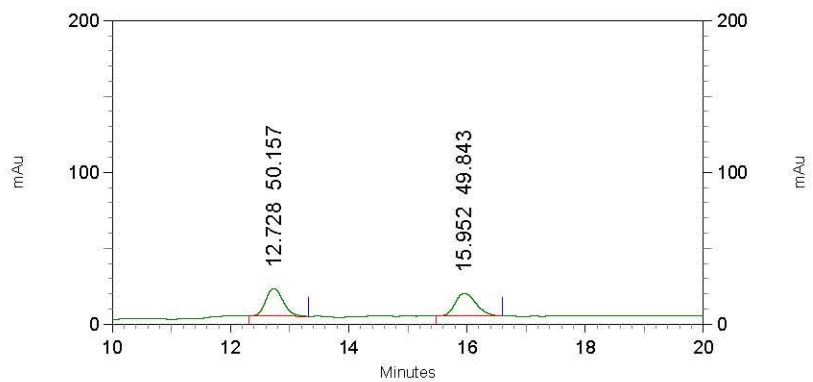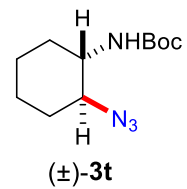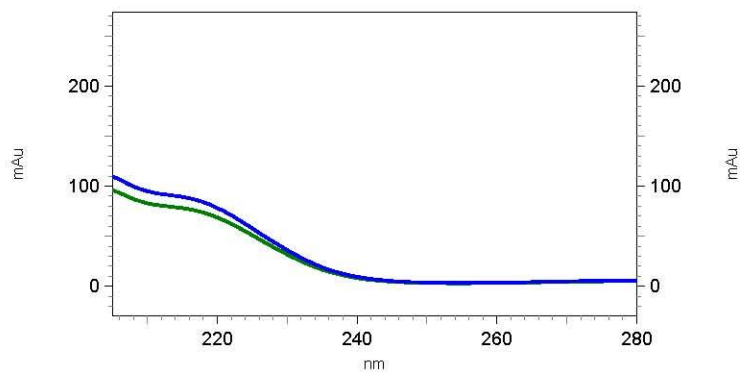

19: 235 nm, 4 nm  
Results

| Pk #   | Name | Retention Time | Area Percent |
|--------|------|----------------|--------------|
| 1      |      | 12.728         | 50.157       |
| 2      |      | 15.952         | 49.843       |
| Totals |      |                | 100.000      |

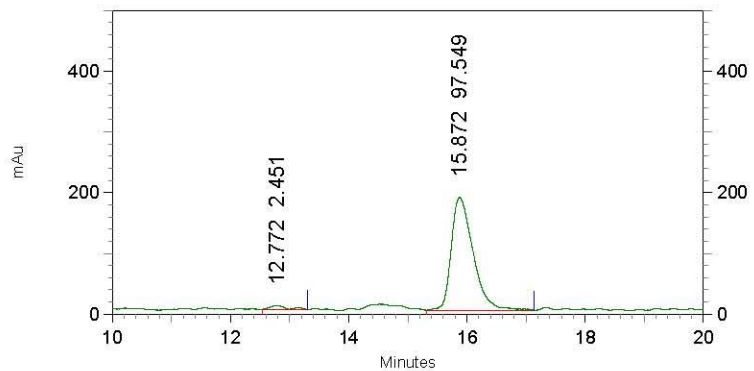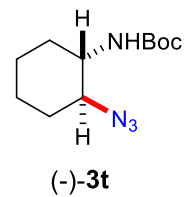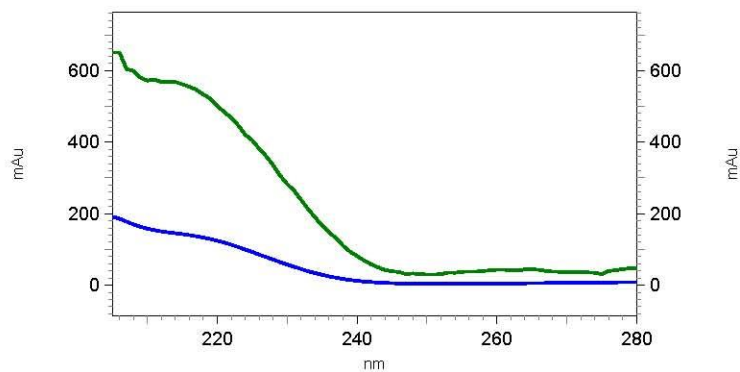

1: 197 nm, 4 nm  
Results

| Pk #   | Name | Retention Time | Area Percent |
|--------|------|----------------|--------------|
| 1      |      | 12.772         | 2.451        |
| 2      |      | 15.872         | 97.549       |
| Totals |      |                | 100.000      |

CHCl<sub>3</sub>

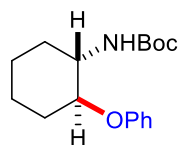

<sup>1</sup>H NMR of **3u**,  
400 MHz, CDCl<sub>3</sub>

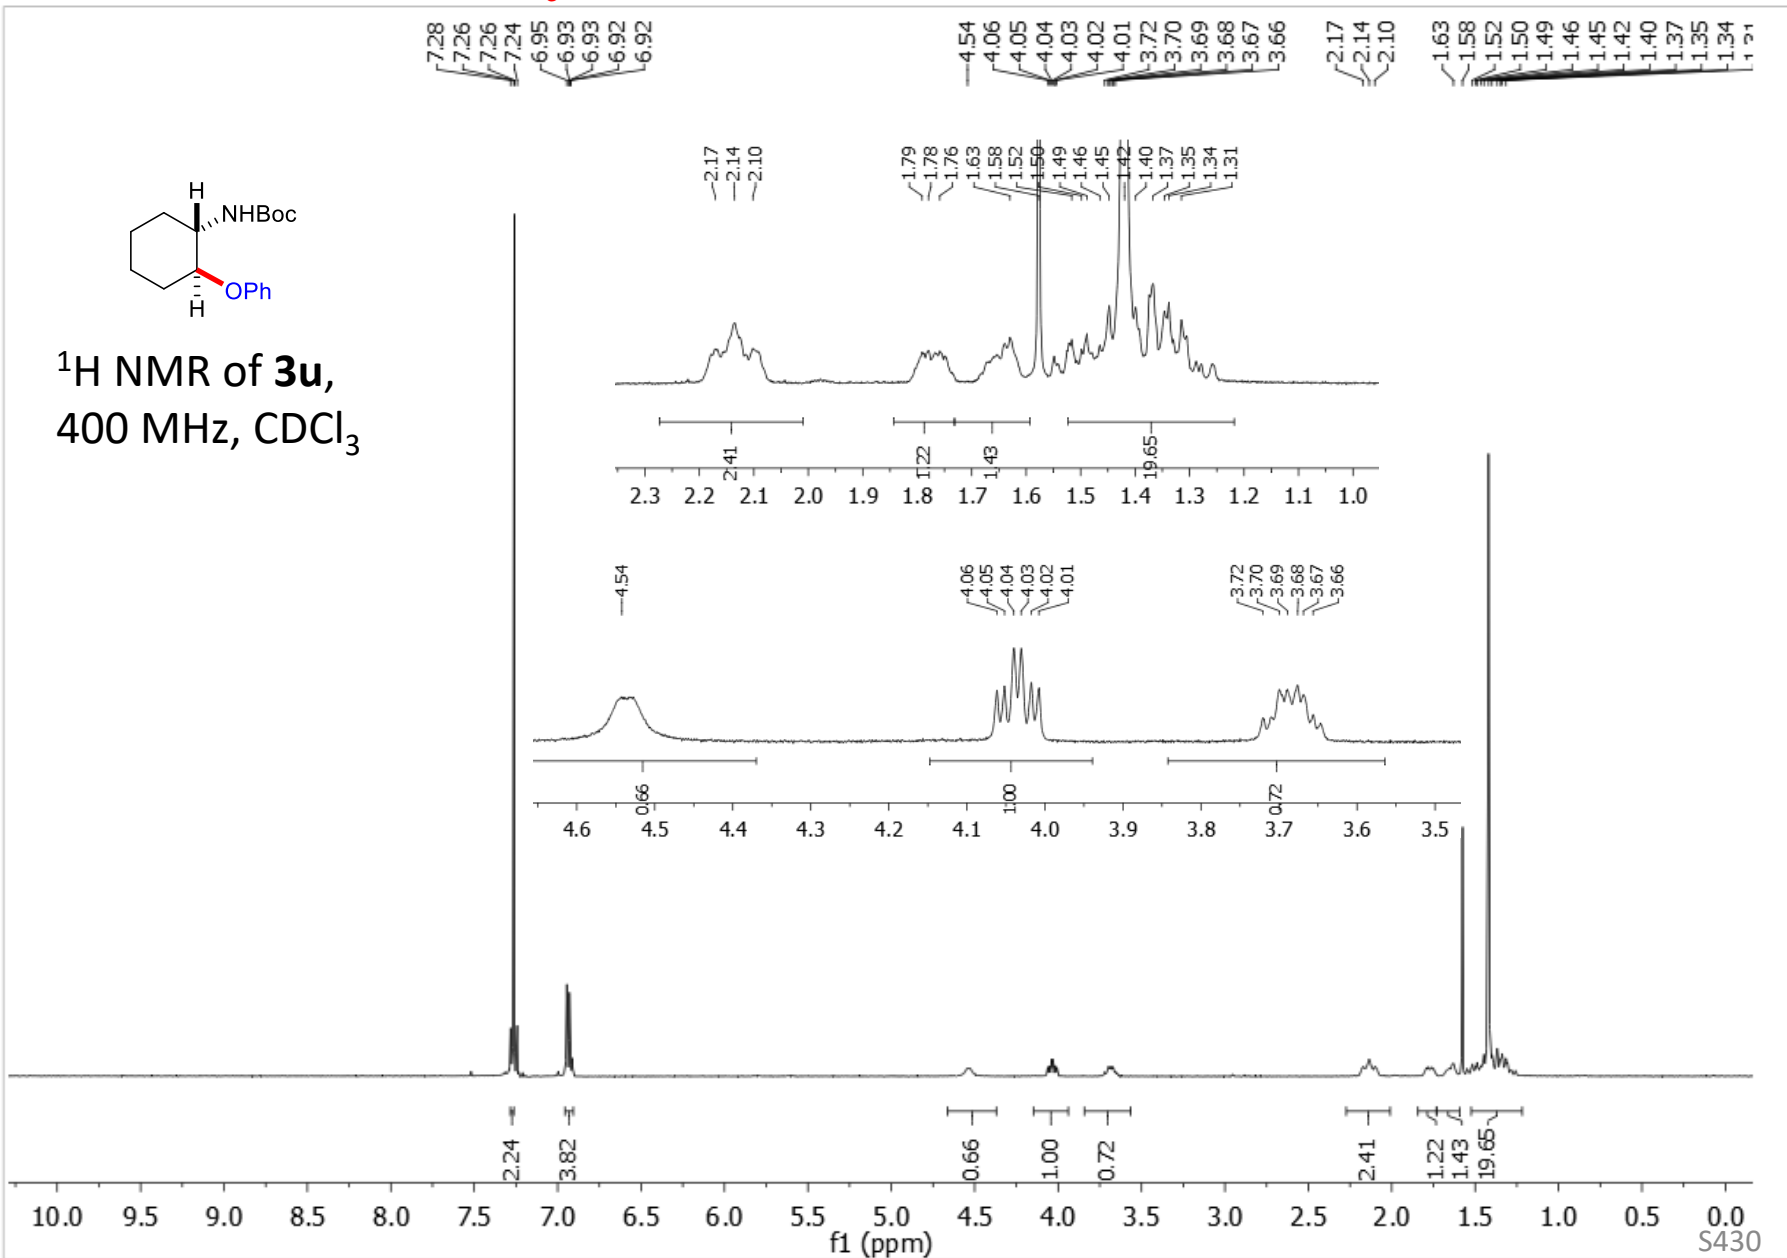

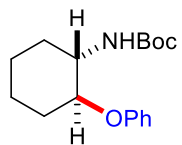

$^{13}\text{C}$  NMR of **3u**, 100 MHz,  $\text{CDCl}_3$

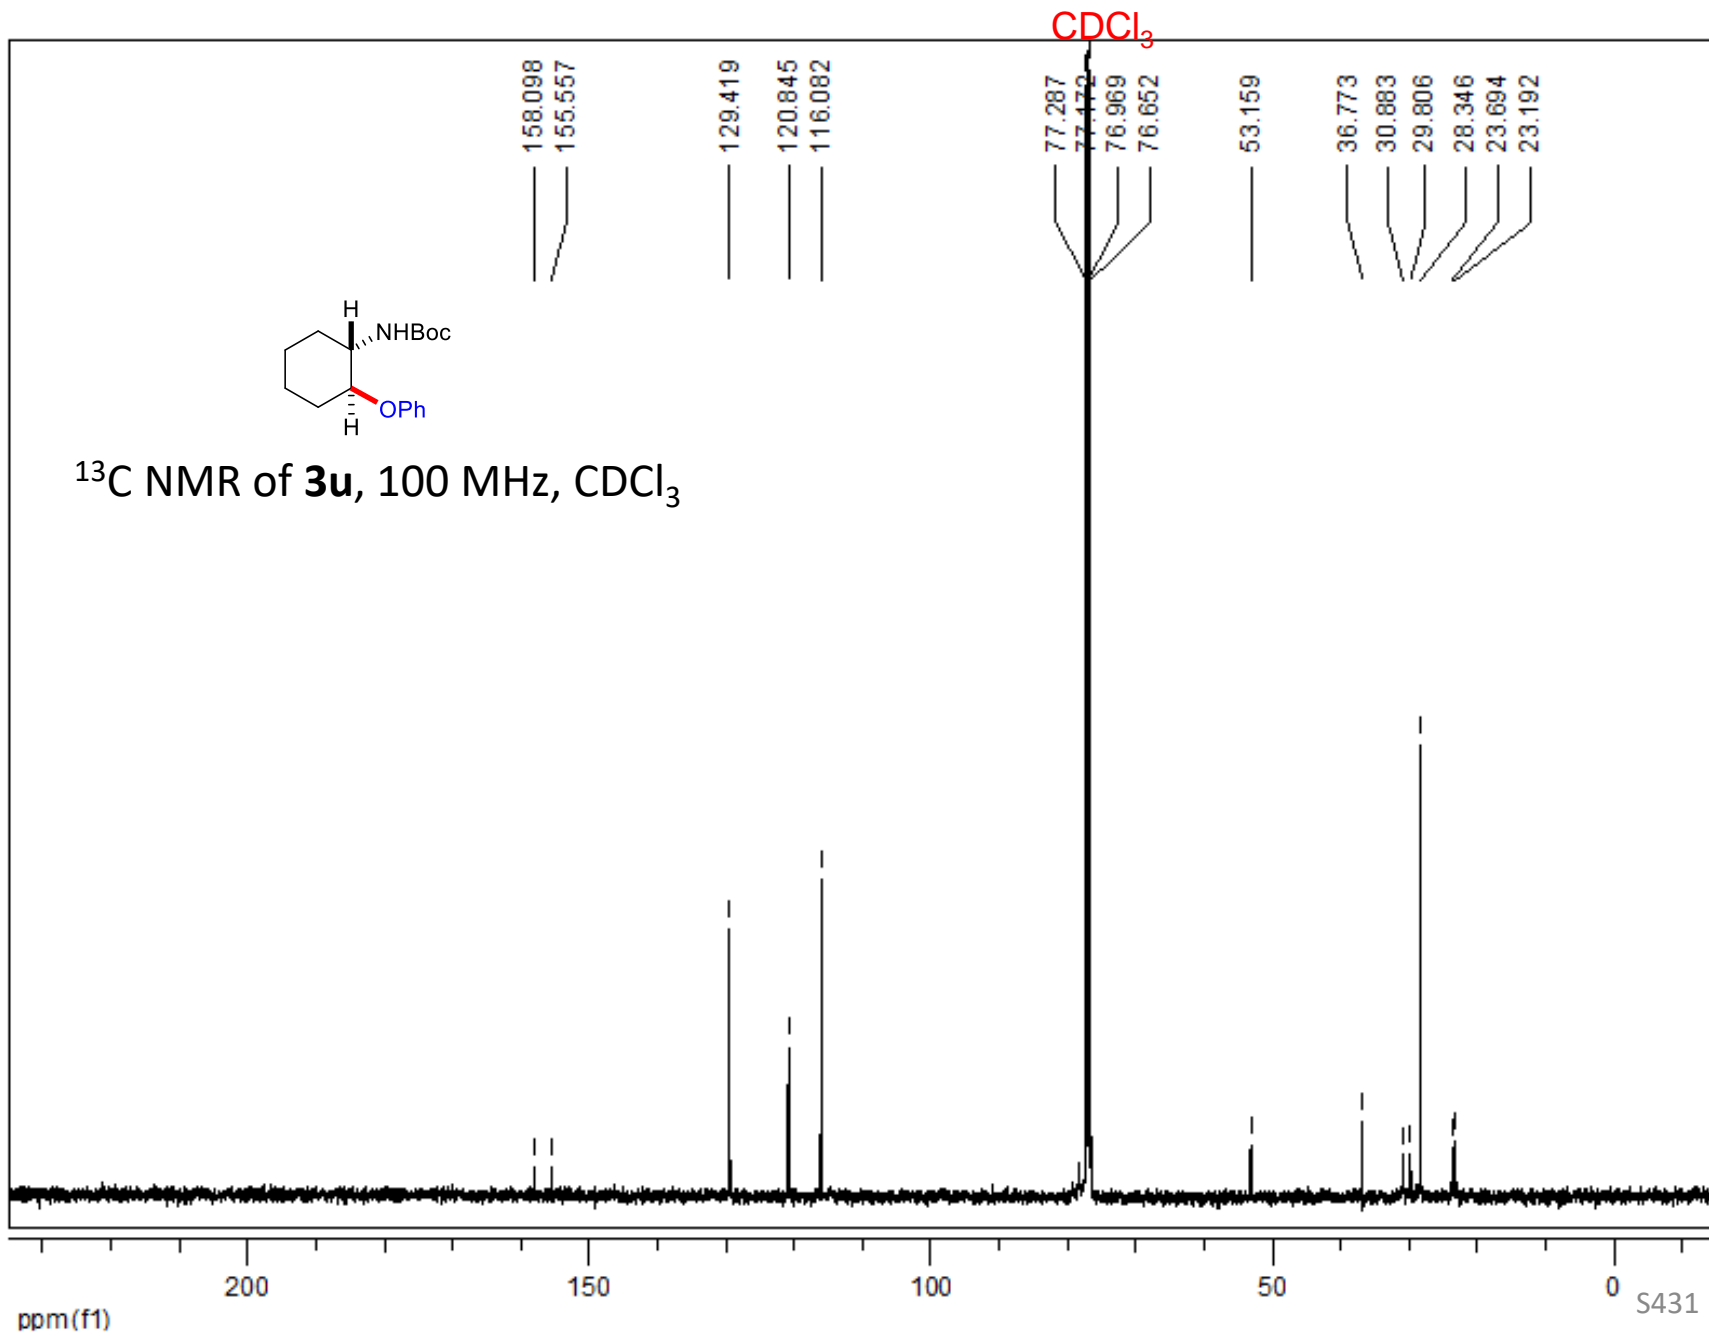



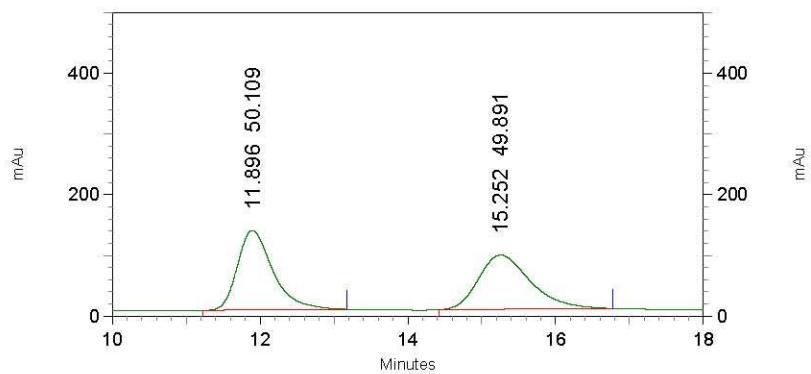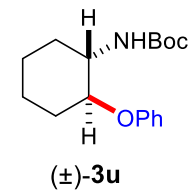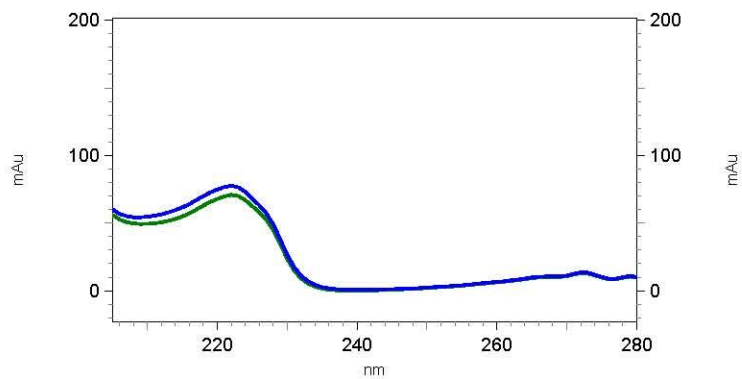

19: 230 nm, 4 nm  
Results

| Pk #   | Name | Retention Time | Area Percent |
|--------|------|----------------|--------------|
| 1      |      | 11.896         | 50.109       |
| 2      |      | 15.252         | 49.891       |
| Totals |      |                | 100.000      |

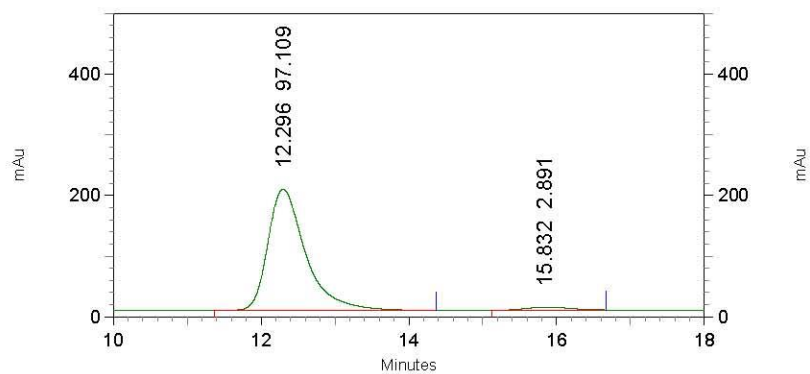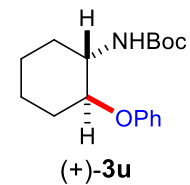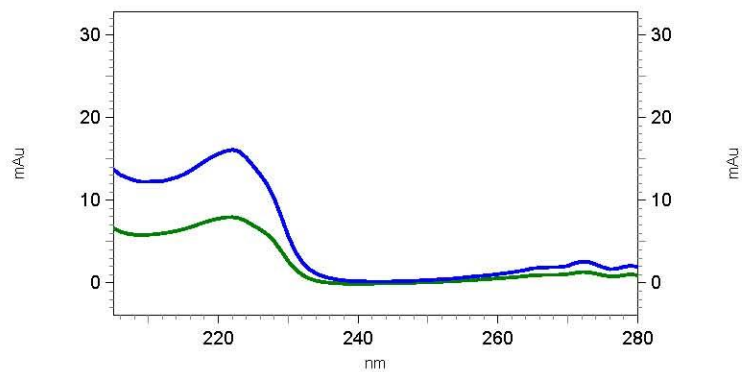

19: 230 nm, 4 nm  
Results

| Pk #   | Name | Retention Time | Area Percent |
|--------|------|----------------|--------------|
| 1      |      | 12.296         | 97.109       |
| 2      |      | 15.832         | 2.891        |
| Totals |      |                | 100.000      |

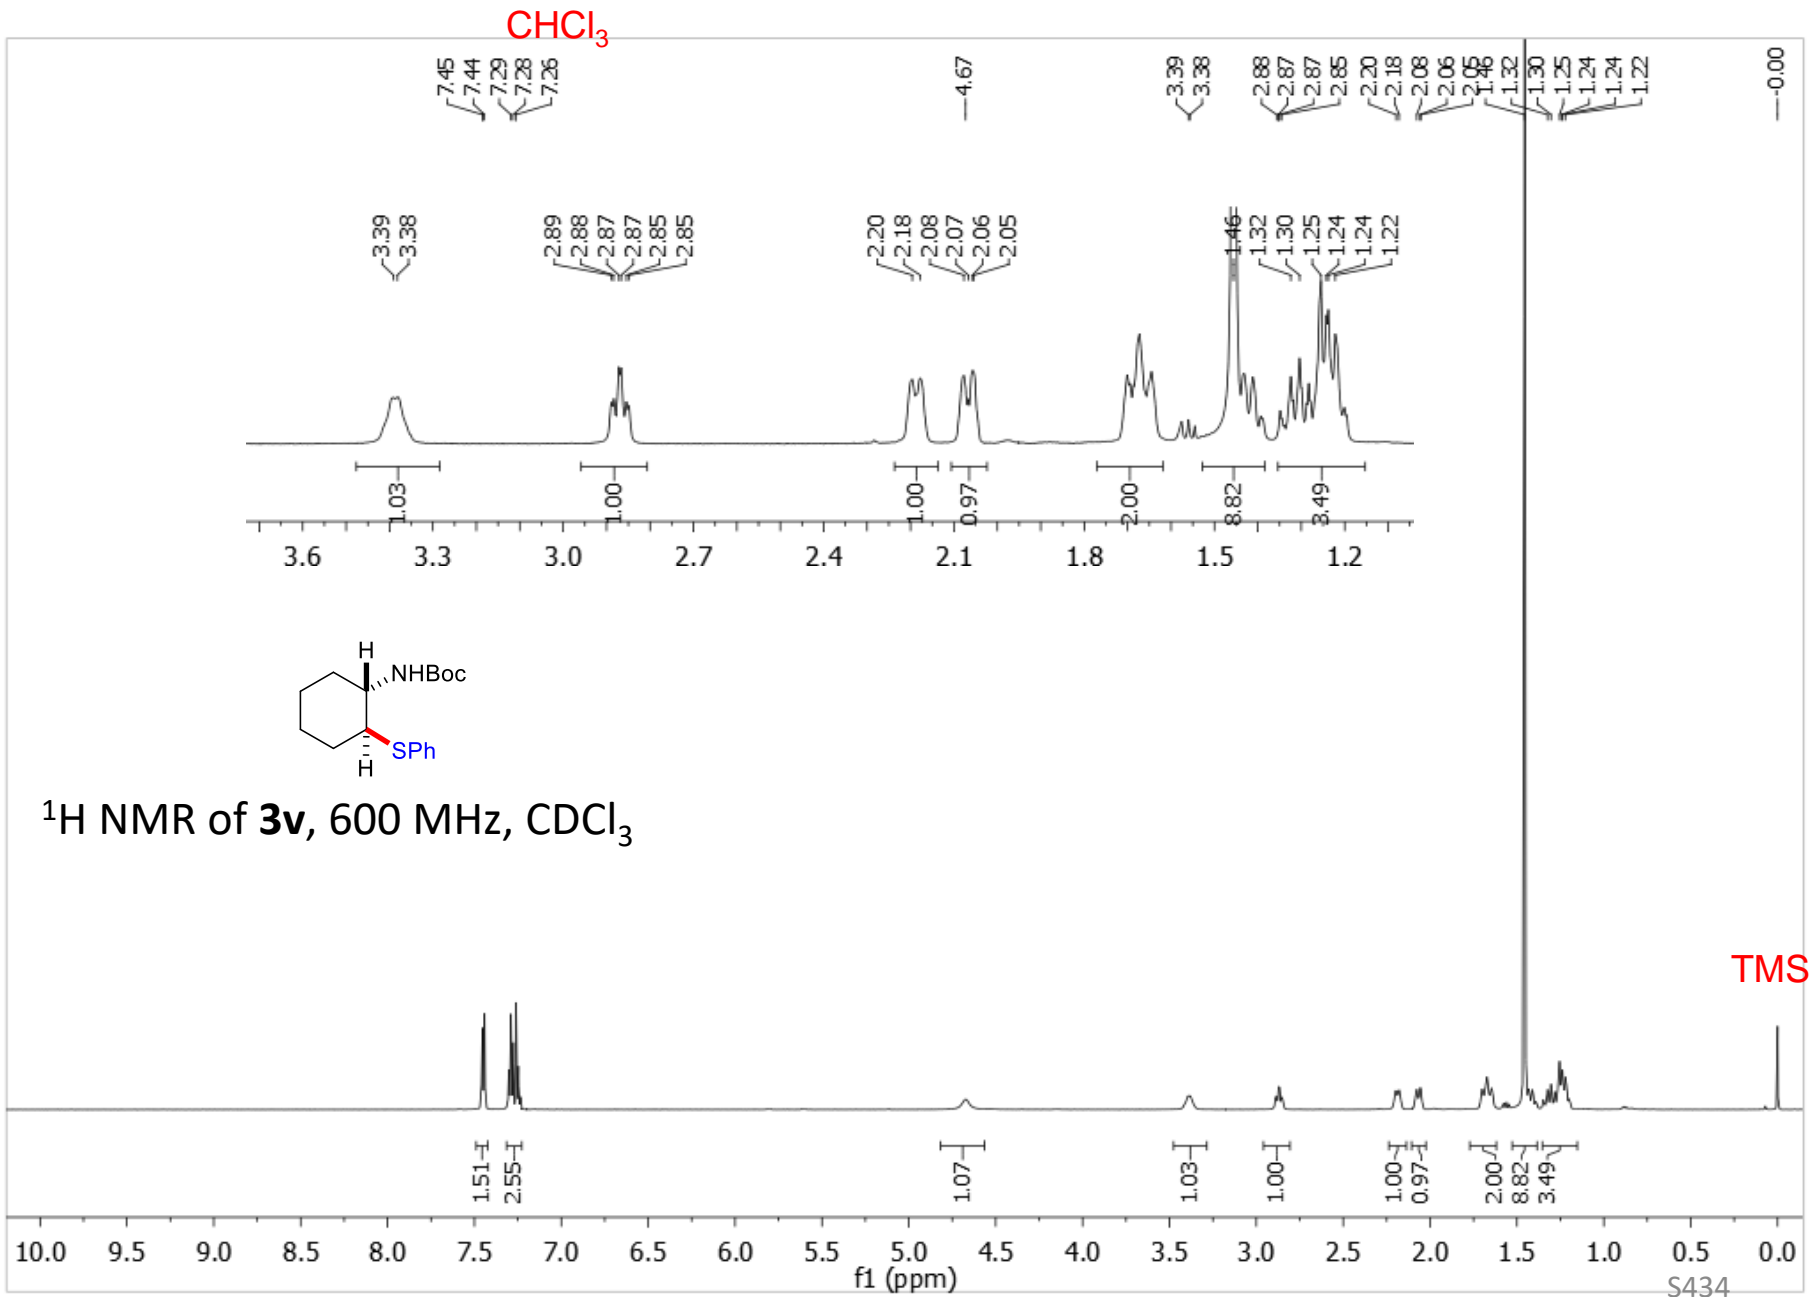

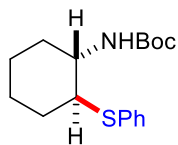

$^{13}\text{C}$  NMR of **3v**, 400 MHz,  $\text{CDCl}_3$

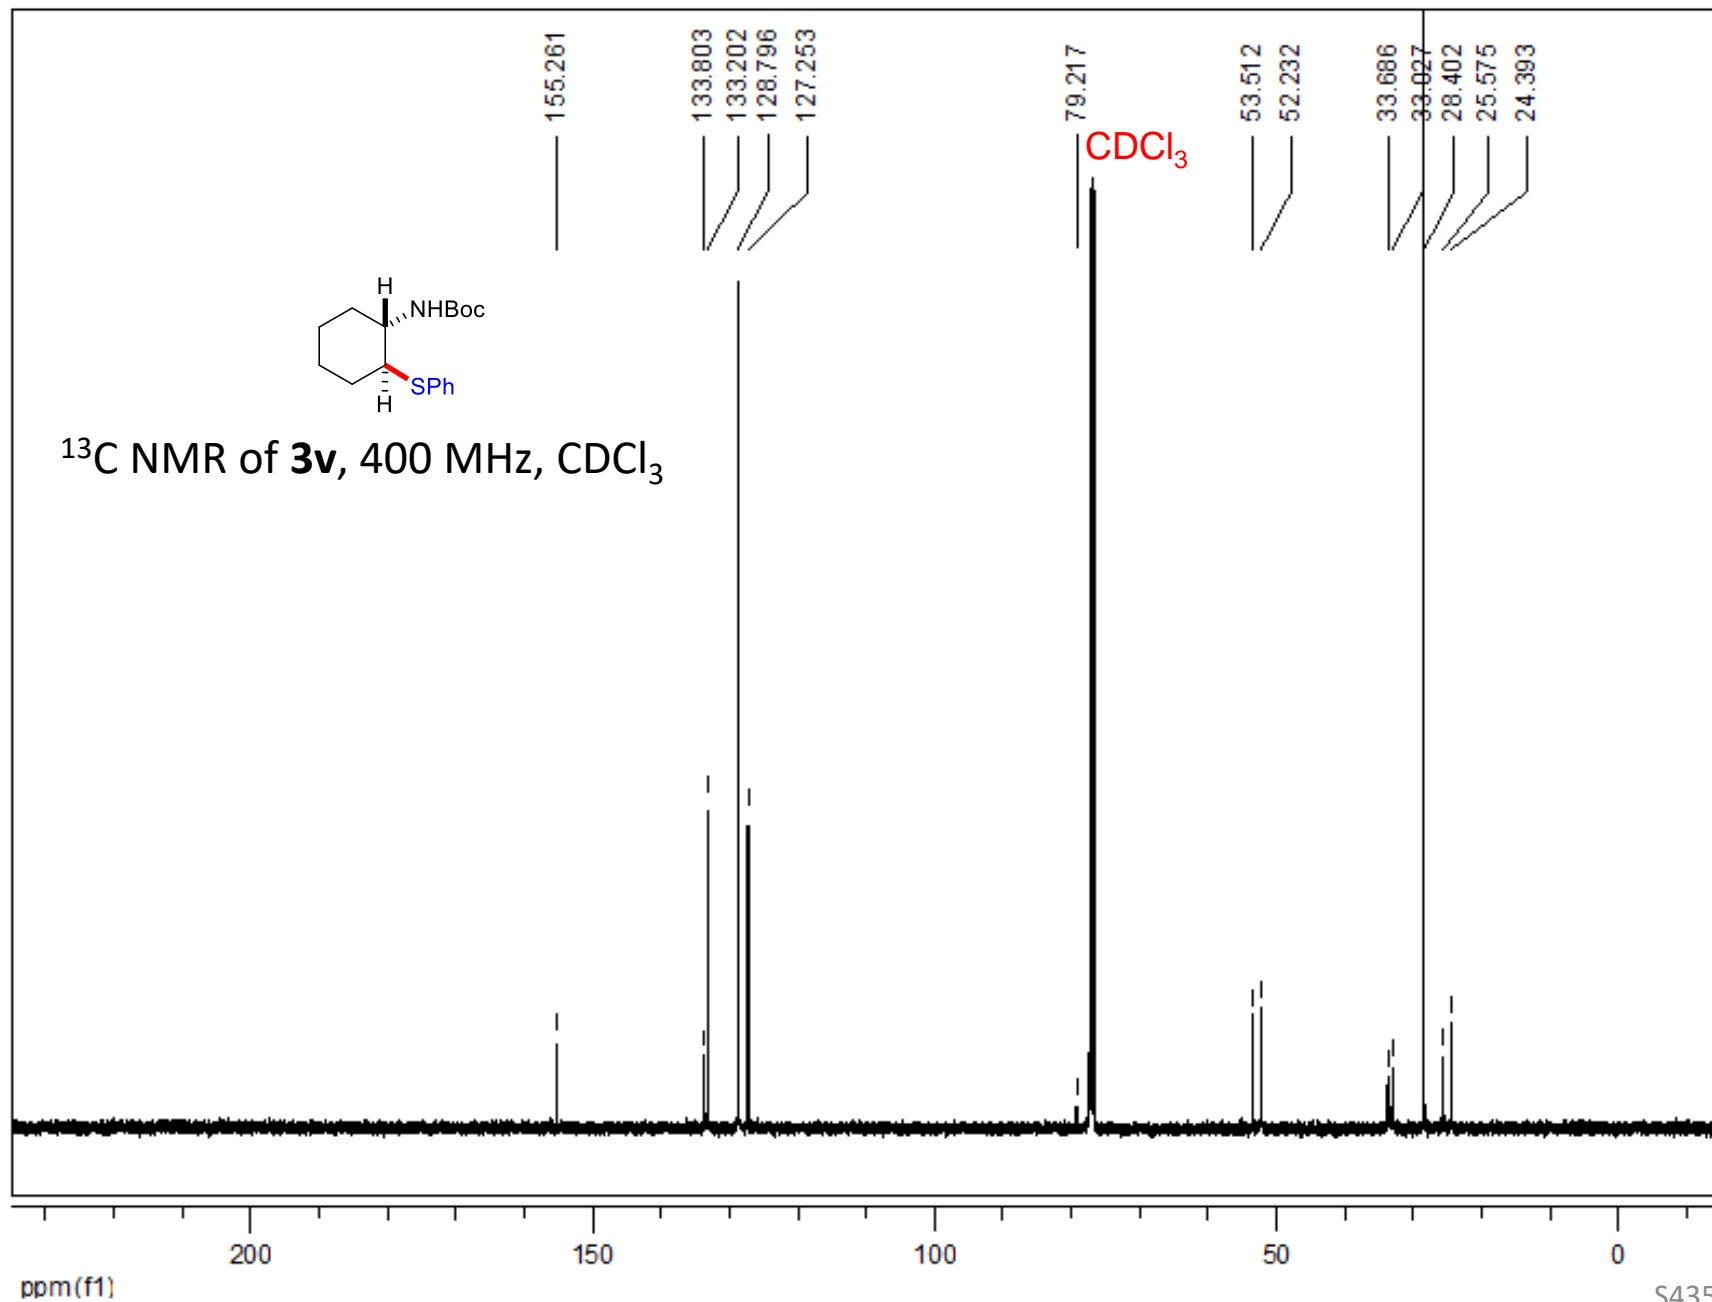

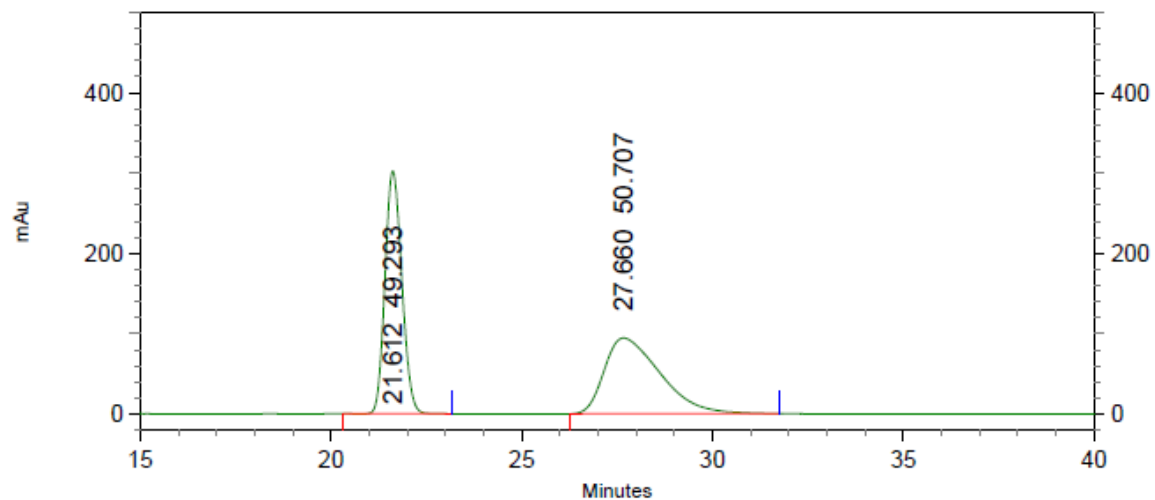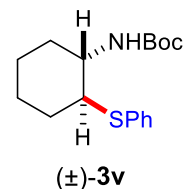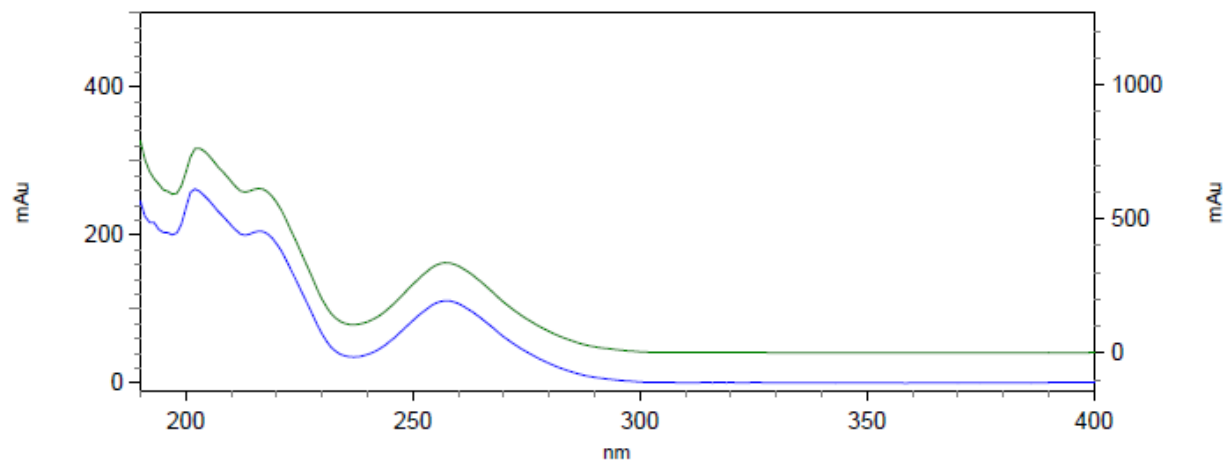

5: 221 nm, 4  
 nm Results

| Pk #   | Retention Time | Area Percent |
|--------|----------------|--------------|
| 1      | 21.612         | 49.293       |
| 2      | 27.660         | 50.707       |
| Totals |                | 100.000      |

C:\EZStart\Projects\Default\Data\K0L-383-ADH-2%  
C:\Documents and Settings\zhang\Desktop\DSW\0210.met

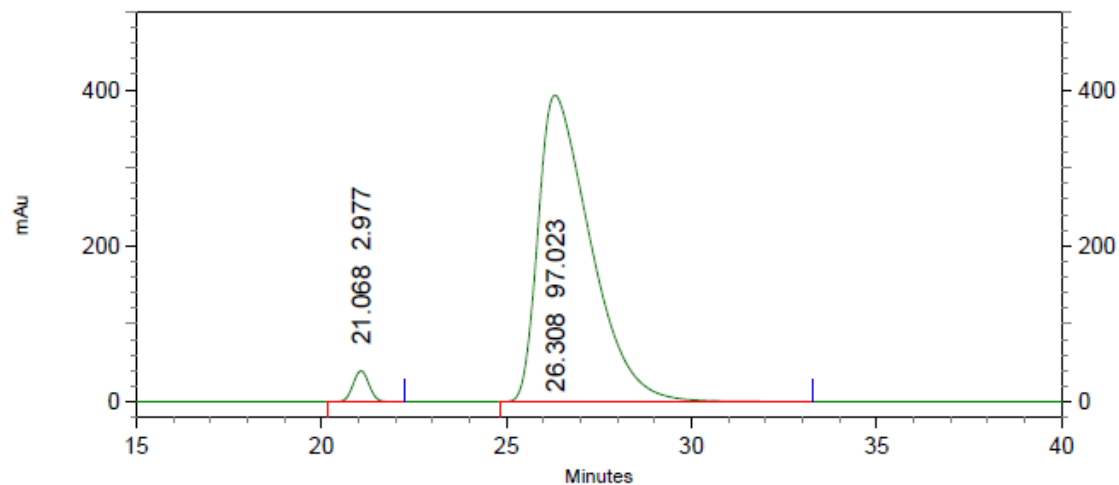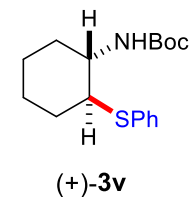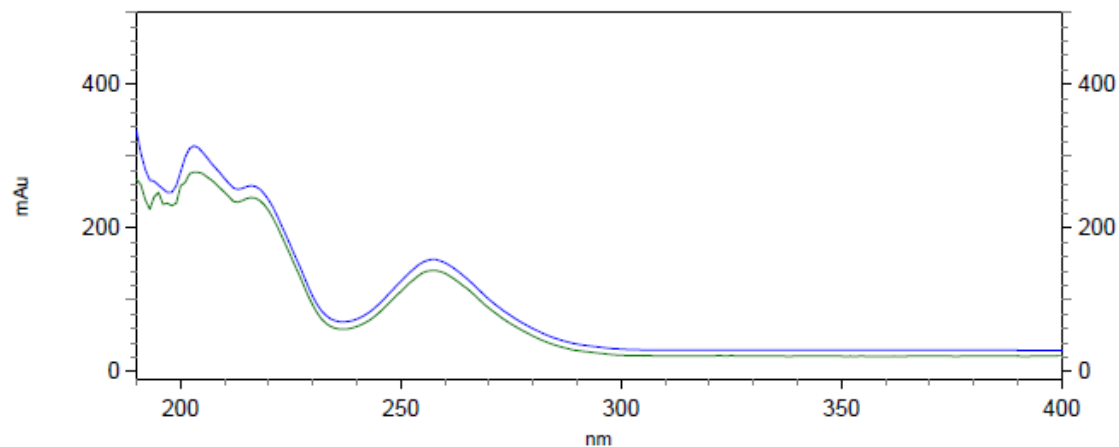

5: 221 nm, 4  
nm Results

| Pk # | Retention Time | Area Percent |
|------|----------------|--------------|
| 1    | 21.068         | 2.977        |
| 2    | 26.308         | 97.023       |

|        |         |
|--------|---------|
| Totals | 100.000 |
|--------|---------|

## checkCIF/PLATON report

Structure factors have been supplied for datablock(s) C17H25NO2S

THIS REPORT IS FOR GUIDANCE ONLY. IF USED AS PART OF A REVIEW PROCEDURE FOR PUBLICATION, IT SHOULD NOT REPLACE THE EXPERTISE OF AN EXPERIENCED CRYSTALLOGRAPHIC REFEREE.

No syntax errors found. [CIF dictionary](#) [Interpreting this report](#)

### Datablock: C17H25NO2S

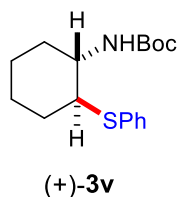

|                 |                   |                    |                  |
|-----------------|-------------------|--------------------|------------------|
| Bond precision: | C-C = 0.0053 A    | Wavelength=1.54178 |                  |
| Cell:           | a=5.1618 (4)      | b=8.6542 (7)       | c=10.5664 (8)    |
|                 | alpha=112.852 (4) | beta=96.462 (4)    | gamma=99.605 (4) |
| Temperature:    | 100 K             |                    |                  |
|                 | Calculated        | Reported           |                  |
| Volume          | 420.62 (6)        | 420.62 (6)         |                  |
| Space group     | P 1               | P 1                |                  |
| Hall group      | P 1               | P 1                |                  |
| Moiety formula  | C17 H25 N O2 S    | C17 H25 N O2 S     |                  |
| Sum formula     | C17 H25 N O2 S    | C17 H25 N O2 S     |                  |
| Mr              | 307.44            | 307.44             |                  |
| Dx, g cm-3      | 1.214             | 1.214              |                  |
| Z               | 1                 | 1                  |                  |
| Mu (mm-1)       | 1.735             | 1.735              |                  |
| F000            | 166.0             | 166.0              |                  |
| F000'           | 166.75            |                    |                  |
| h,k,lmax        | 6,10,12           | 6,10,12            |                  |
| Nref            | 3166 [ 1583]      | 2898               |                  |
| Tmin,Tmax       | 0.517,0.683       | 0.604,0.753        |                  |
| Tmin'           | 0.367             |                    |                  |

Correction method= # Reported T Limits: Tmin=0.604 Tmax=0.753  
AbsCorr = MULTI-SCAN

Data completeness= 1.83/0.92      Theta(max)= 69.773

R(reflections)= 0.0412 ( 2863)      wR2(reflections)= 0.1115 ( 2898)

S = 1.068      Npar= 196

The following ALERTS were generated. Each ALERT has the format  
**test-name\_ALERT\_alert-type\_alert-level.**  
Click on the hyperlinks for more details of the test.

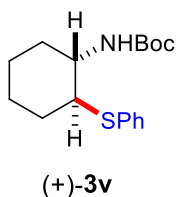

#### Alert level C

|                   |                                                  |              |
|-------------------|--------------------------------------------------|--------------|
| PLAT340 ALERT 3 C | Low Bond Precision on C-C Bonds .....            | 0.00527 Ang. |
| PLAT911 ALERT 3 C | Missing FCF Refl Between Thmin & STh/L= 0.600    | 20 Report    |
| PLAT915 ALERT 3 C | No Flack x Check Done: Low Friedel Pair Coverage | 85 %         |

#### Alert level G

|                   |                                                  |              |
|-------------------|--------------------------------------------------|--------------|
| PLAT002 ALERT 2 G | Number of Distance or Angle Restraints on AtSite | 2 Note       |
| PLAT154 ALERT 1 G | The s.u.'s on the Cell Angles are Equal ..(Note) | 0.004 Degree |
| PLAT172 ALERT 4 G | The CIF-Embedded .res File Contains DFIX Records | 1 Report     |
| PLAT791 ALERT 4 G | Model has Chirality at C4 (Chiral SPGR)          | S Verify     |
| PLAT791 ALERT 4 G | Model has Chirality at C9 (Chiral SPGR)          | S Verify     |
| PLAT860 ALERT 3 G | Number of Least-Squares Restraints .....         | 4 Note       |
| PLAT910 ALERT 3 G | Missing # of FCF Reflection(s) Below Theta(Min). | 1 Note       |
| PLAT912 ALERT 4 G | Missing # of FCF Reflections Above STh/L= 0.600  | 12 Note      |
| PLAT913 ALERT 3 G | Missing # of Very Strong Reflections in FCF ...  | 1 Note       |
| PLAT978 ALERT 2 G | Number C-C Bonds with Positive Residual Density. | 5 Info       |

- 0 ALERT level A = Most likely a serious problem - resolve or explain  
 0 ALERT level B = A potentially serious problem, consider carefully  
 3 ALERT level C = Check. Ensure it is not caused by an omission or oversight  
 10 ALERT level G = General information/check it is not something unexpected

- 1 ALERT type 1 CIF construction/syntax error, inconsistent or missing data  
 2 ALERT type 2 Indicator that the structure model may be wrong or deficient  
 6 ALERT type 3 Indicator that the structure quality may be low  
 4 ALERT type 4 Improvement, methodology, query or suggestion  
 0 ALERT type 5 Informative message, check

It is advisable to attempt to resolve as many as possible of the alerts in all categories. Often the minor alerts point to easily fixed oversights, errors and omissions in your CIF or refinement strategy, so attention to these fine details can be worthwhile. In order to resolve some of the more serious problems it may be necessary to carry out additional measurements or structure refinements. However, the purpose of your study may justify the reported deviations and the more serious of these should normally be commented upon in the discussion or experimental section of a paper or in the "special\_details" fields of the CIF. checkCIF was carefully designed to identify outliers and unusual parameters, but every test has its limitations and alerts that are not important in a particular case may appear. Conversely, the absence of alerts does not guarantee there are no aspects of the results needing attention. It is up to the individual to critically assess their own results and, if necessary, seek expert advice.

#### Publication of your CIF in IUCr journals

A basic structural check has been run on your CIF. These basic checks will be run on all CIFs submitted for publication in IUCr journals (*Acta Crystallographica*, *Journal of Applied Crystallography*, *Journal of Synchrotron Radiation*); however, if you intend to submit to *Acta Crystallographica Section C* or *E* or *IUCrData*, you should make sure that full publication checks are run on the final version of your CIF prior to submission.

#### Publication of your CIF in other journals

Please refer to the *Notes for Authors* of the relevant journal for any special instructions relating to CIF submission.



PLATON version of 23/04/2018; check.def file version of 23/04/2018

Datablock C17H25NO2S - ellipsoid plot

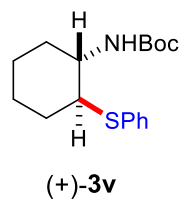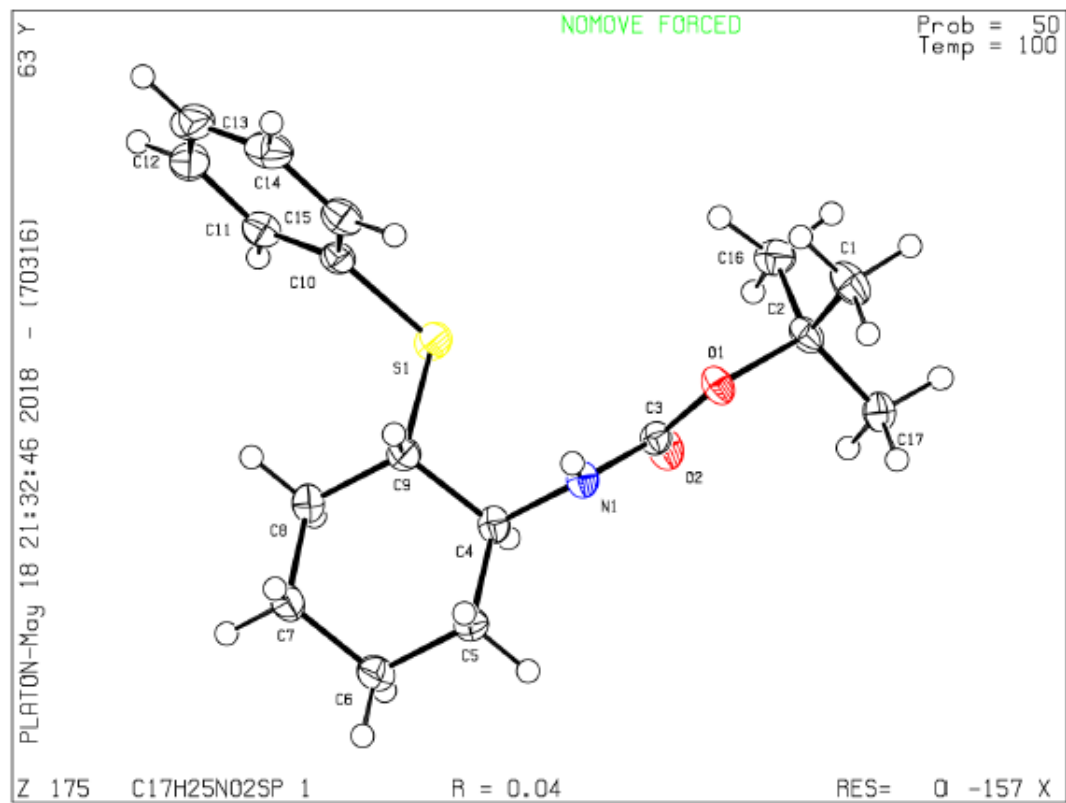

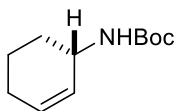

$^1\text{H}$  NMR of **3w**, 400 MHz,  $\text{CDCl}_3$

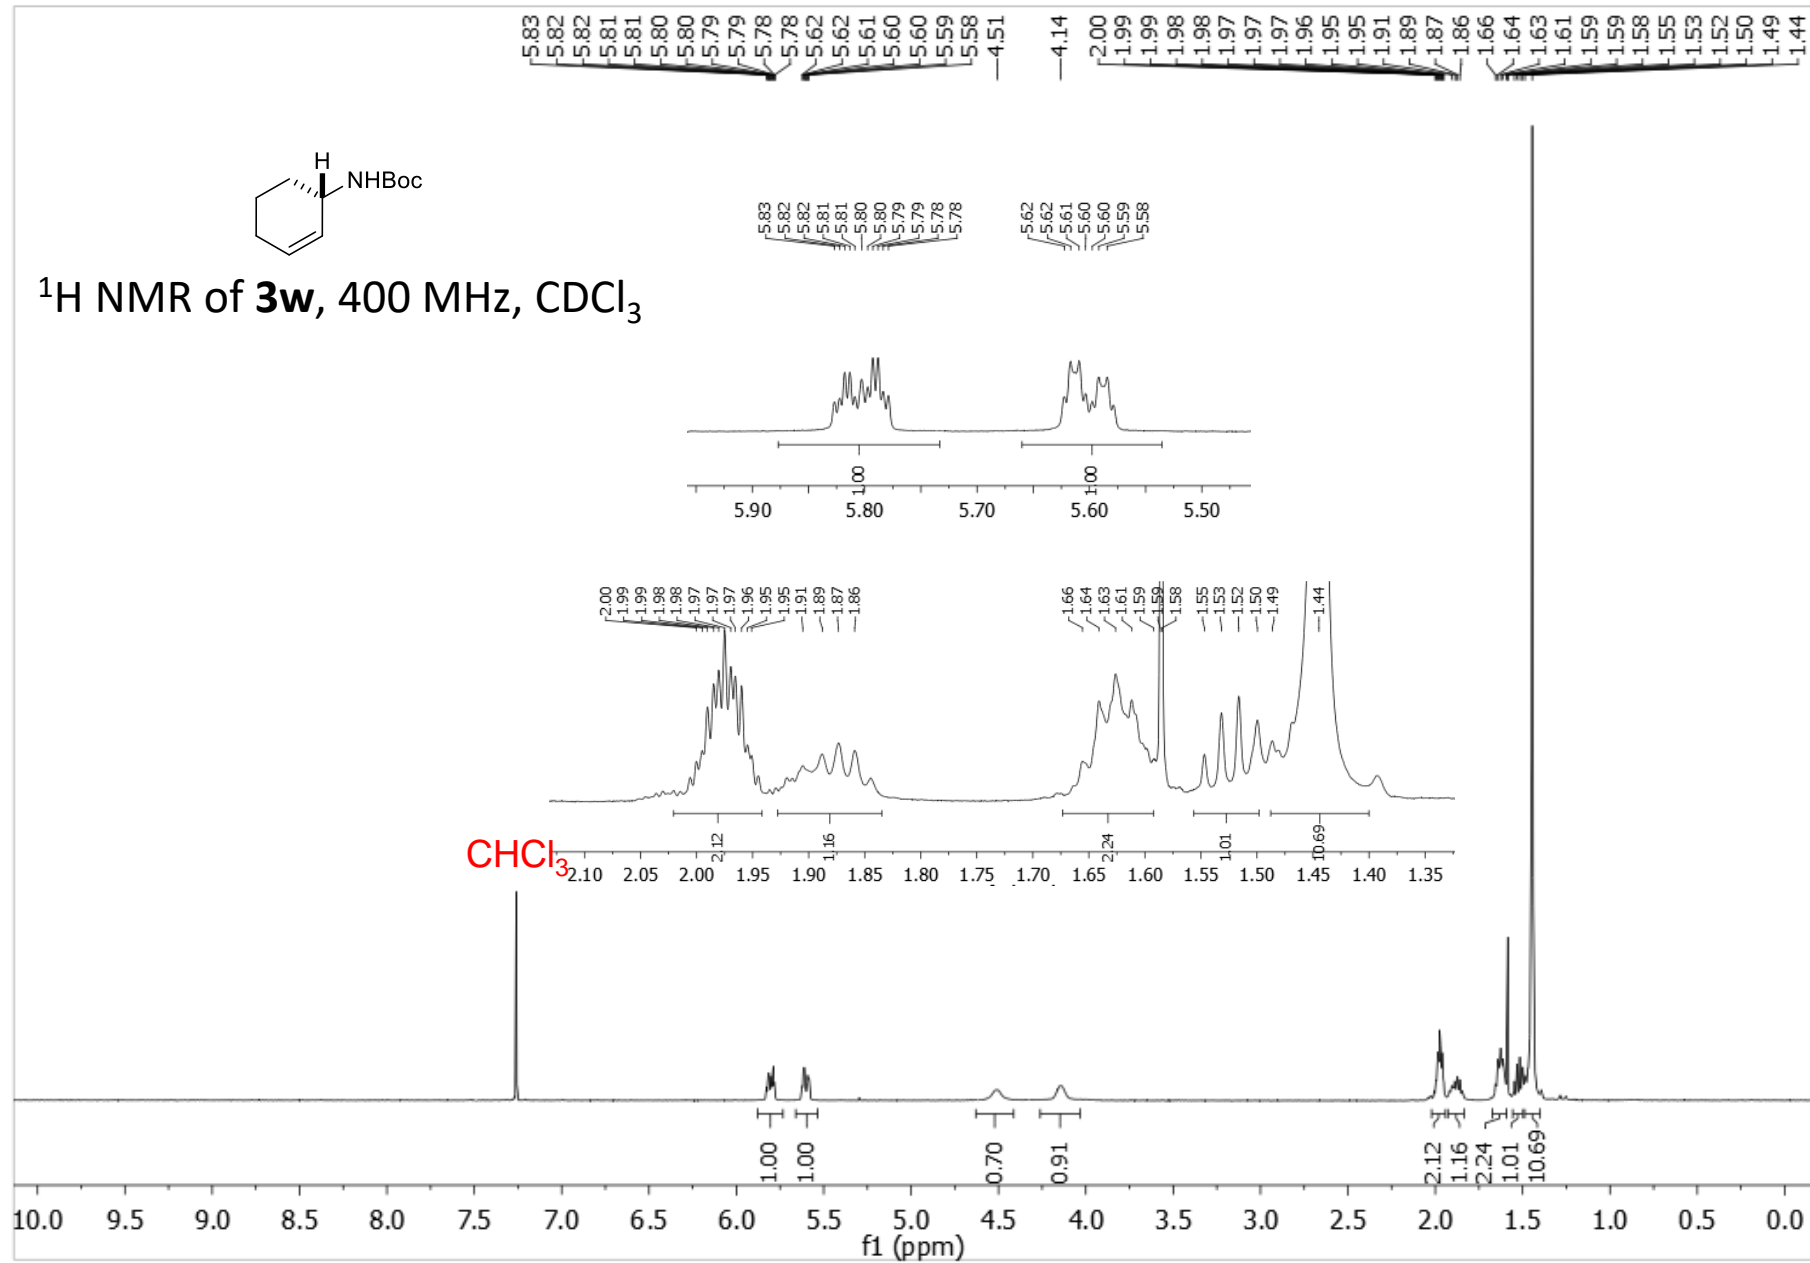

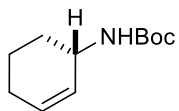

$^{13}\text{C}$  NMR of **3w**, 150 MHz,  $\text{CDCl}_3$

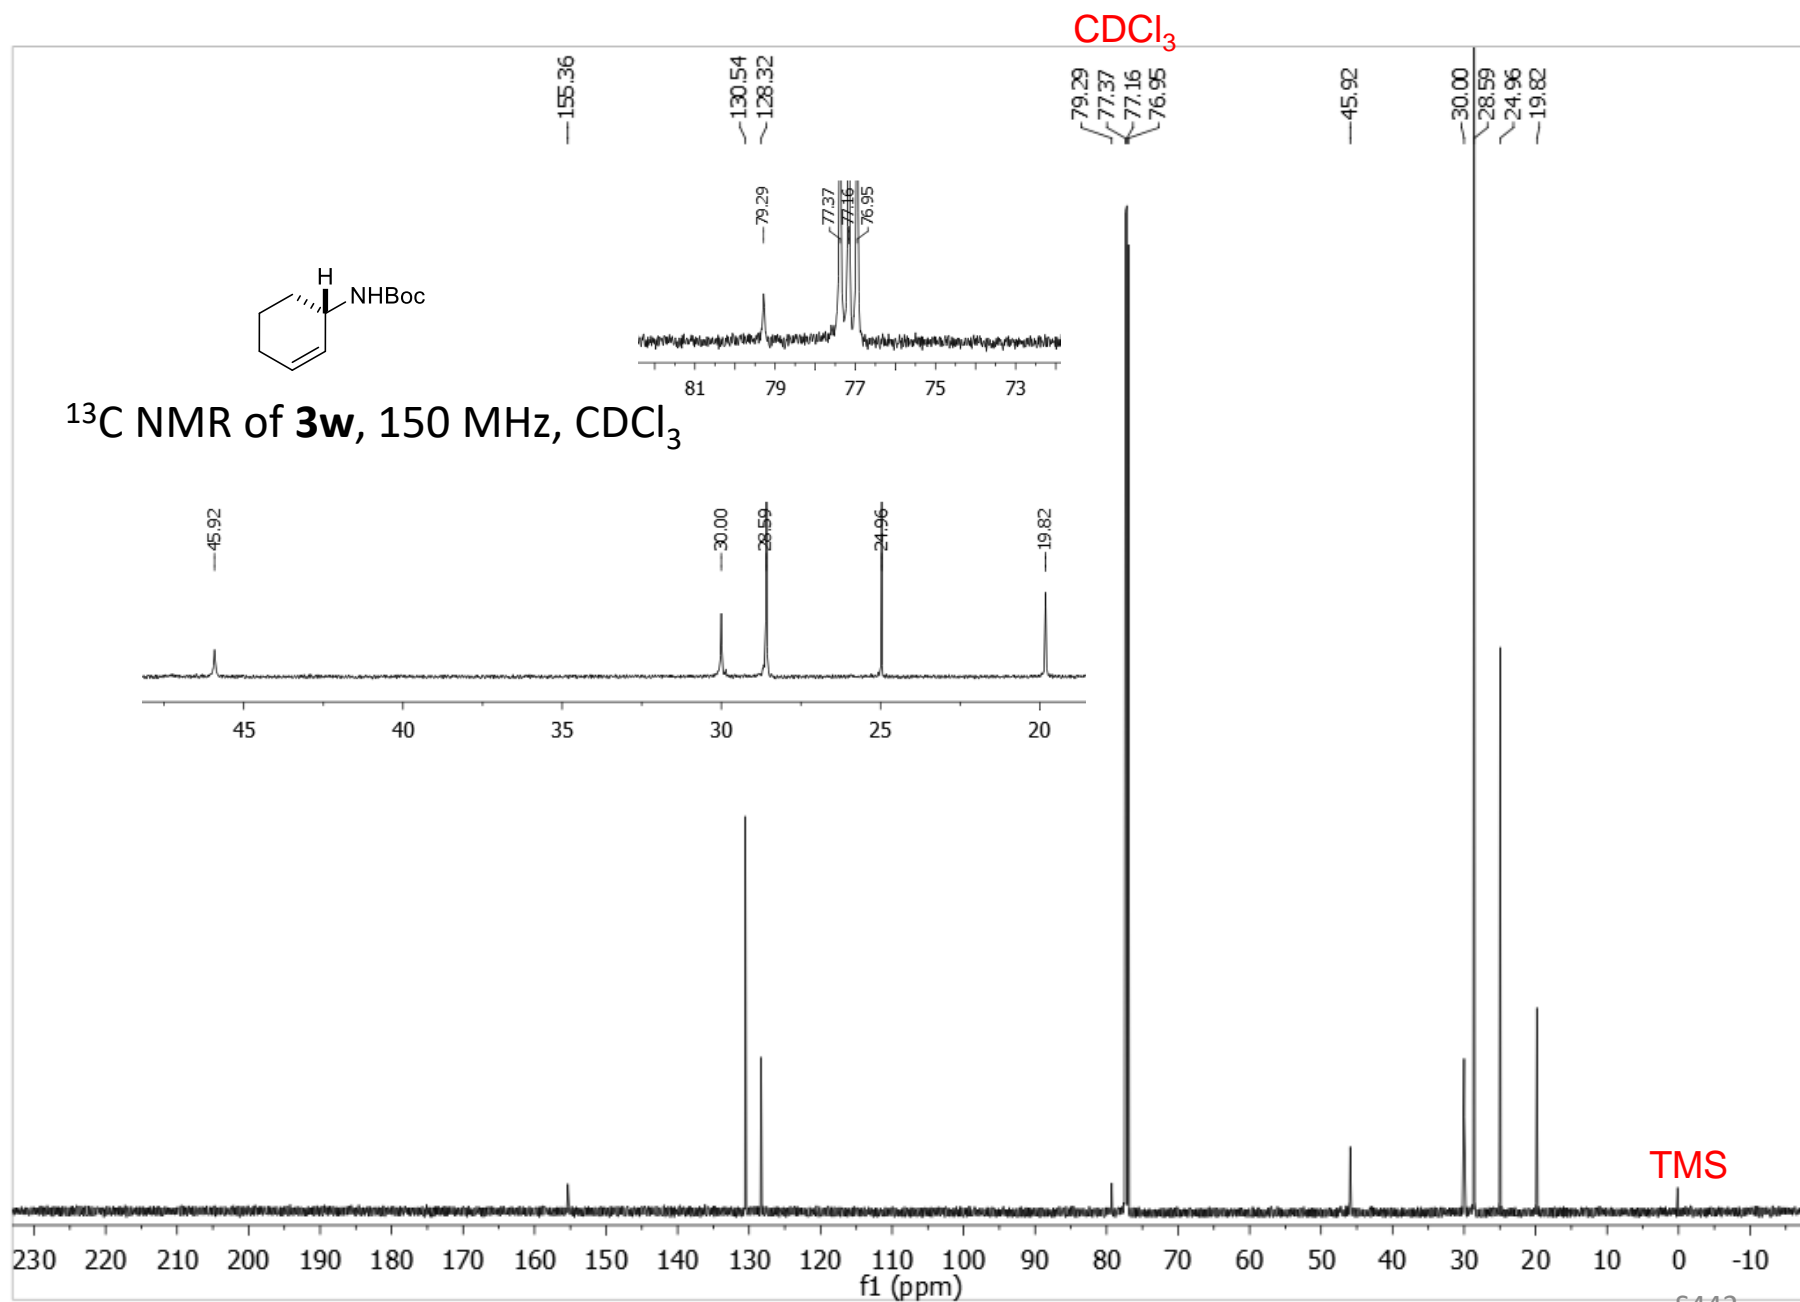

K0L-386-IC-2%-4

C:\EZStart\Projects\Default\Method\LK-2%1mL60MIN.met

C:\EZStart\Projects\Default\Data\K0L-386-IC-2%-4

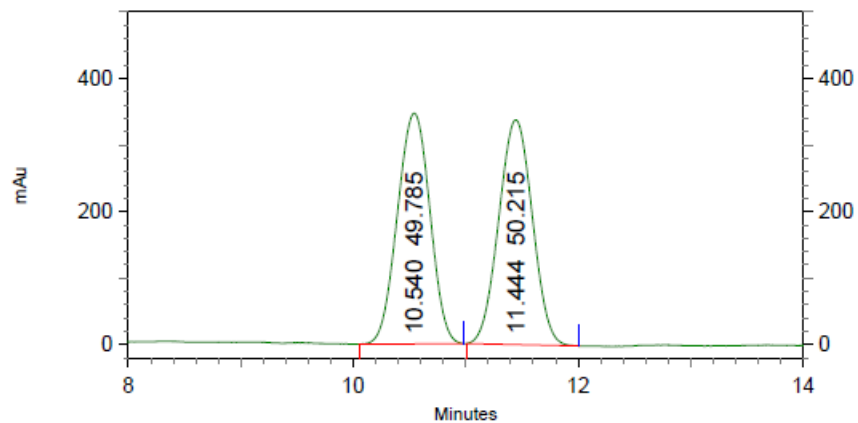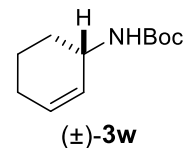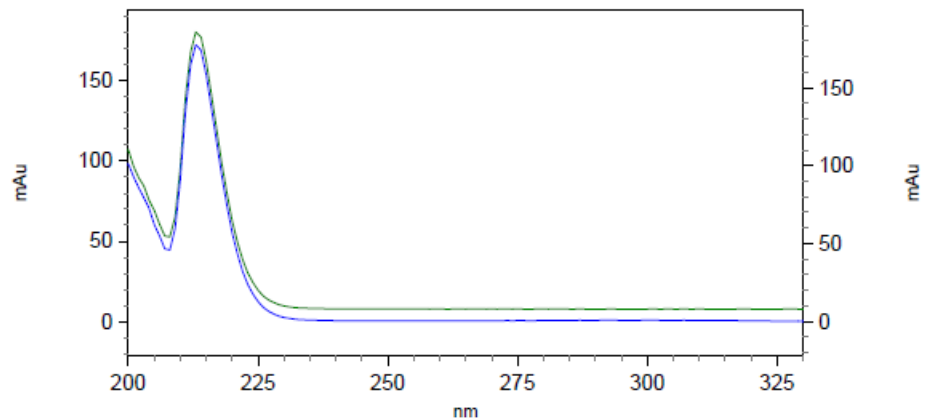

3: 207 nm, 4 nm

Results

| Name | Retention Time | Area Percent | Pk # |
|------|----------------|--------------|------|
|      | 10.540         | 49.785       | 1    |
|      | 11.444         | 50.215       | 2    |

|        |         |
|--------|---------|
| Totals | 100.000 |
|--------|---------|

K0L-385-IC-2%-4

C:\EZStart\Projects\Default\Method\LK-2%1mL60MIN.met

C:\EZStart\Projects\Default\Data\K0L-385-IC-2%-4

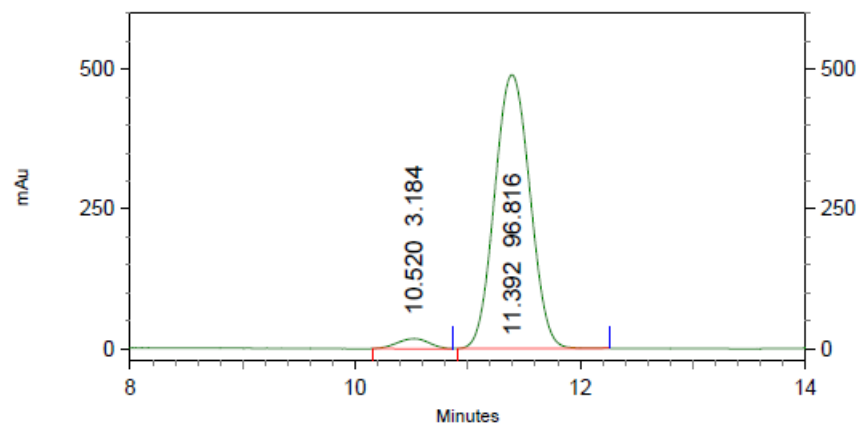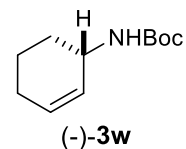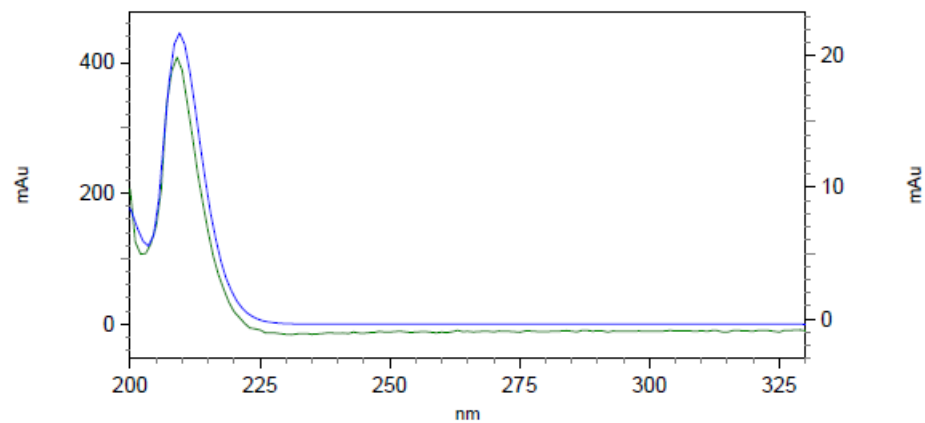

3: 207 nm, 4 nm

Results

| Name | Retention Time | Area Percent | Pk # |
|------|----------------|--------------|------|
|      | 10.520         | 3.184        | 1    |
|      | 11.392         | 96.816       | 2    |

|        |         |
|--------|---------|
| Totals | 100.000 |
|--------|---------|

CHCl<sub>3</sub>

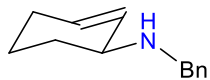

<sup>1</sup>H NMR of **5w**, 600 MHz, CDCl<sub>3</sub>

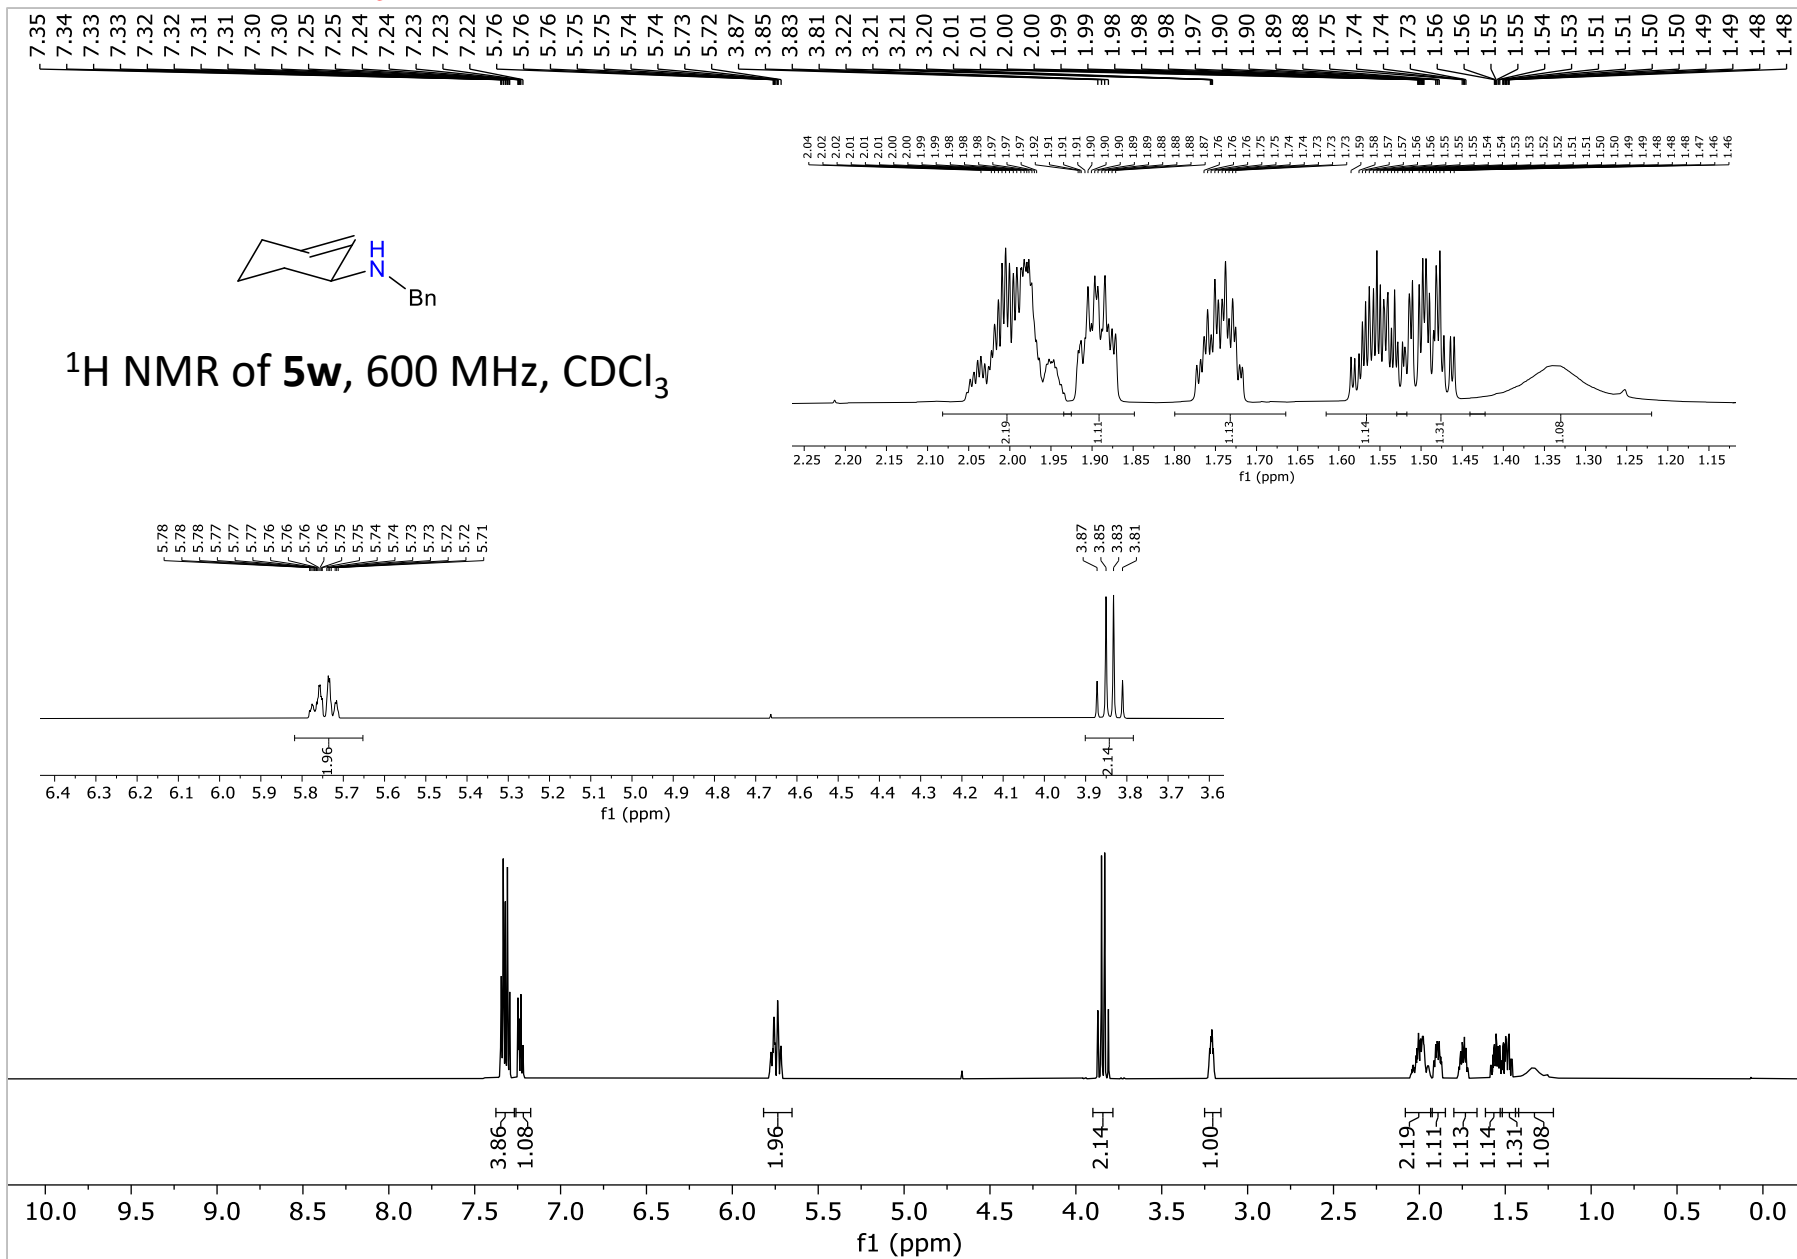

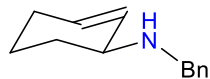

$^{13}\text{C}$  NMR of **5w**, 150 MHz,  $\text{CDCl}_3$

— 140.92  
130.06  
129.08  
128.50  
128.27  
126.95

77.37  
77.16 CDCl<sub>3</sub>  
76.95

52.53  
51.14

29.63  
25.47  
20.35

— 140.92

— 130.06

~ 129.08  
/ 128.50  
/ 128.27

— 126.95

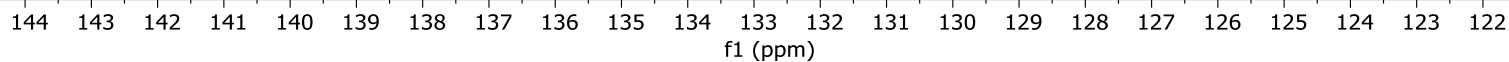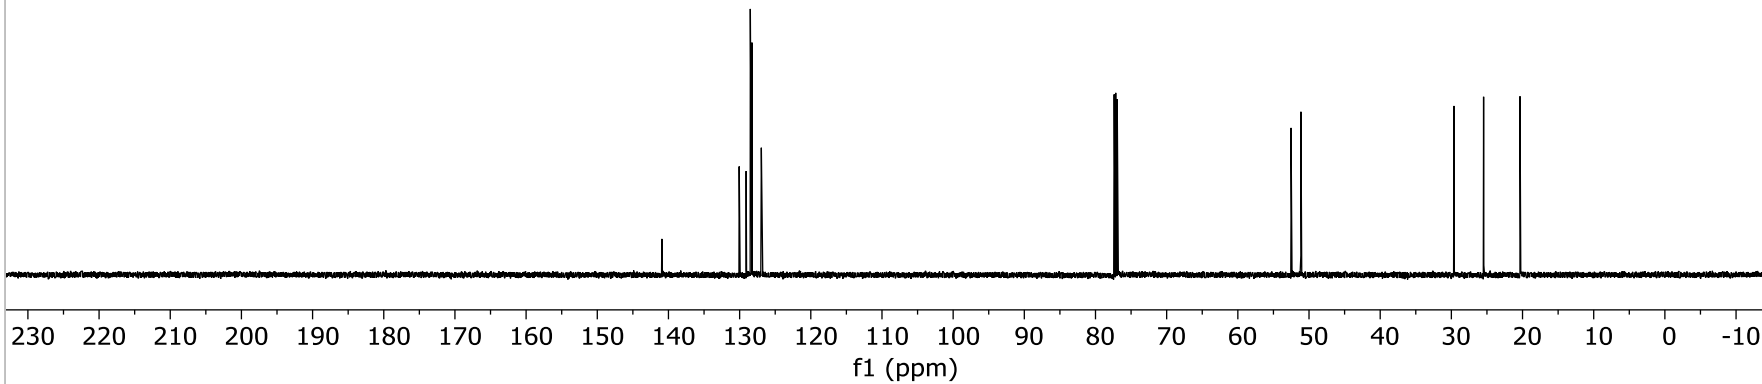

CHCl<sub>3</sub>

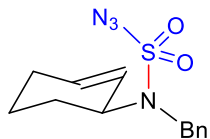

<sup>1</sup>H NMR of **6w**, 600 MHz, CDCl<sub>3</sub>

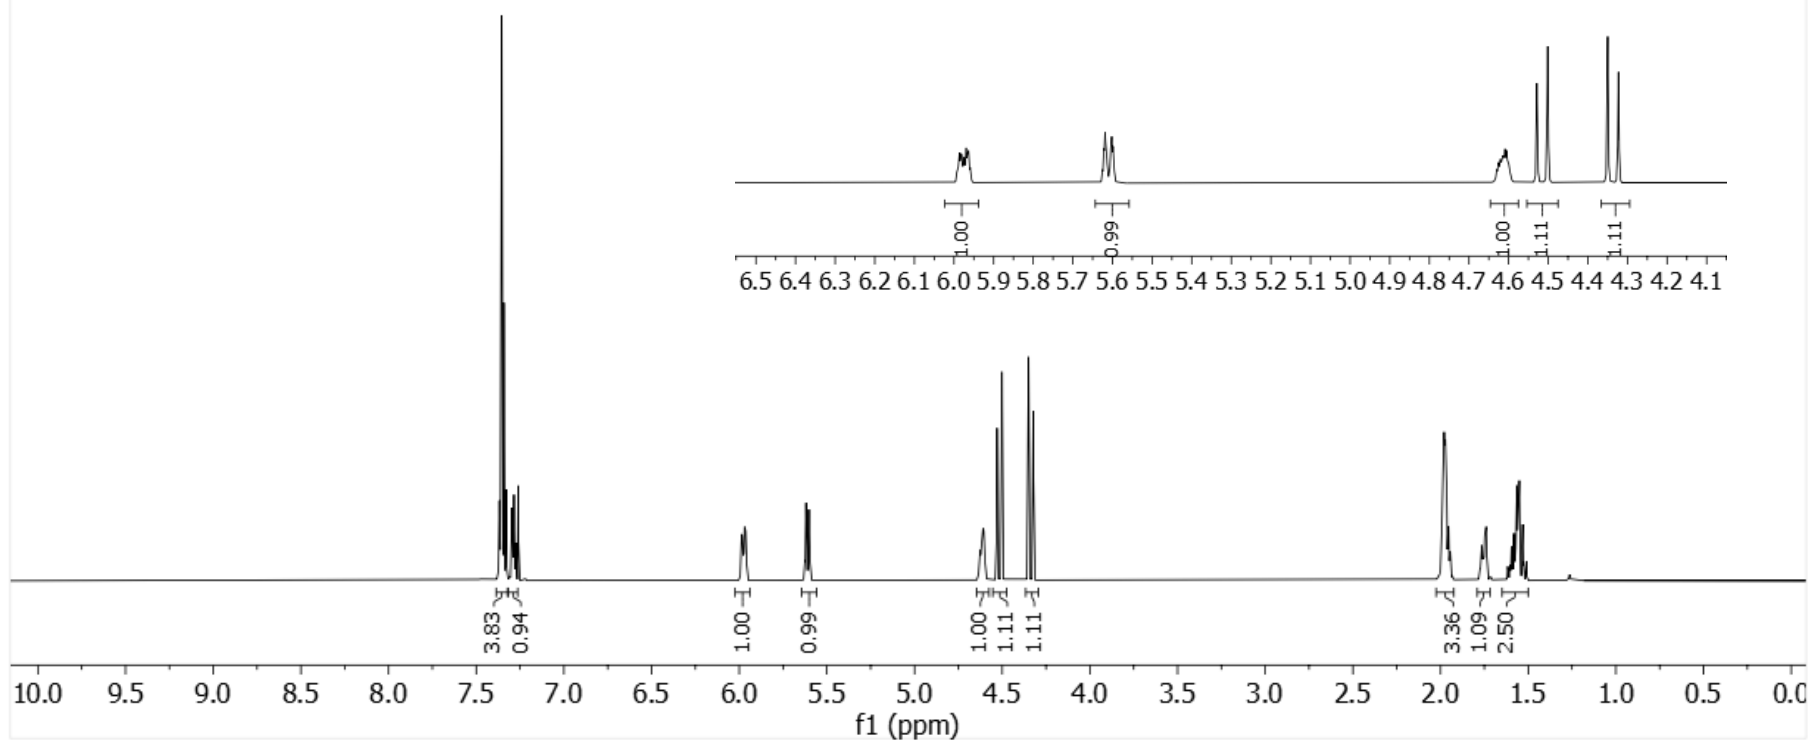



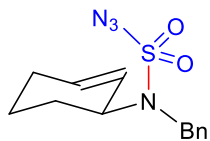

<sup>13</sup>C NMR of **6w**, 150 MHz, CDCl<sub>3</sub>

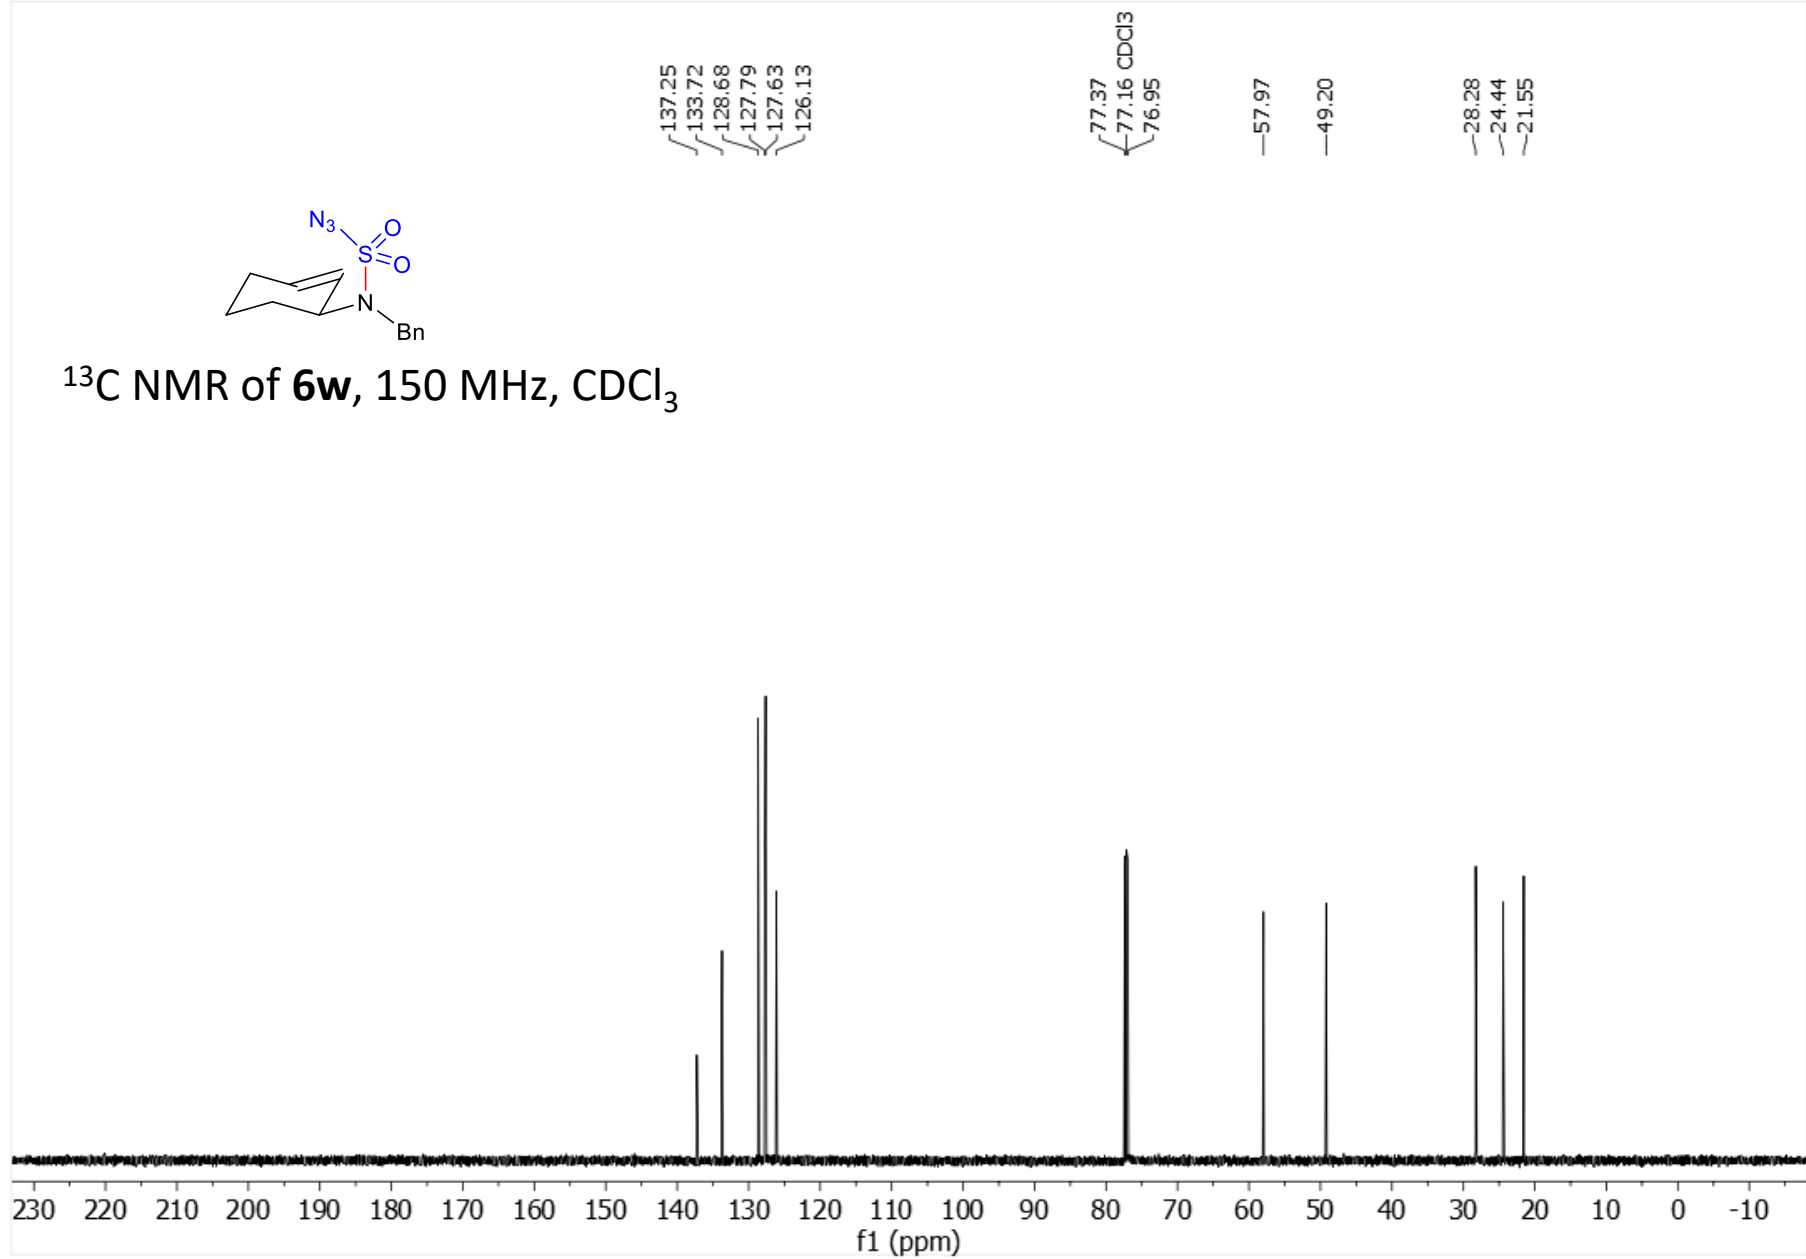

CHCl<sub>3</sub>

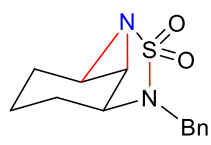

<sup>1</sup>H NMR of **7w**, 600 MHz, CDCl<sub>3</sub>

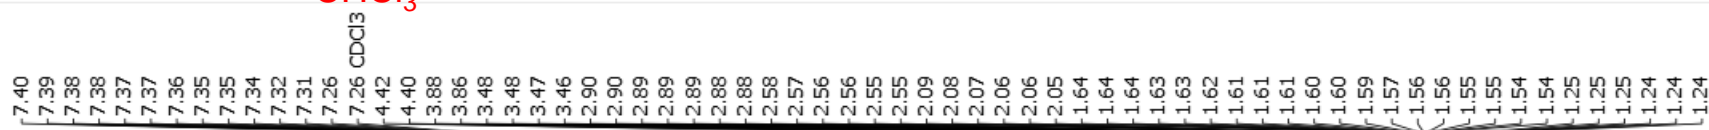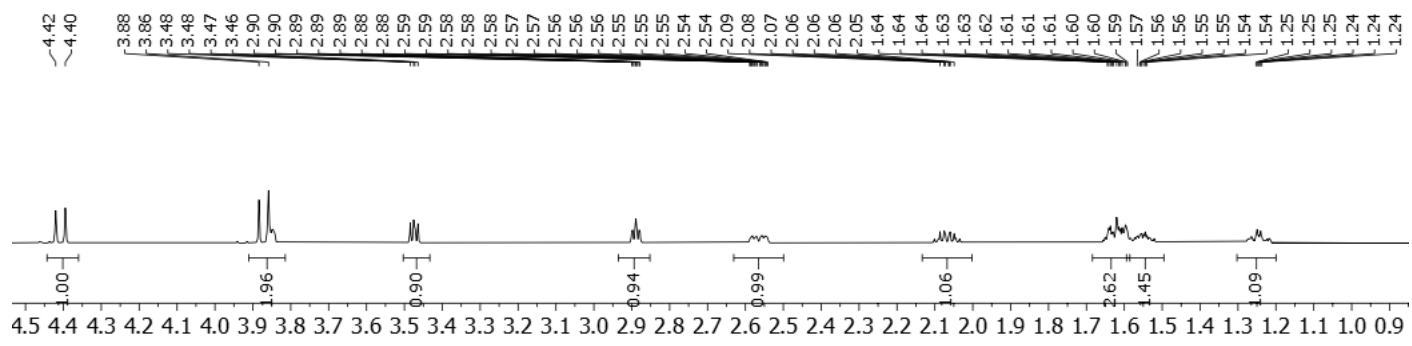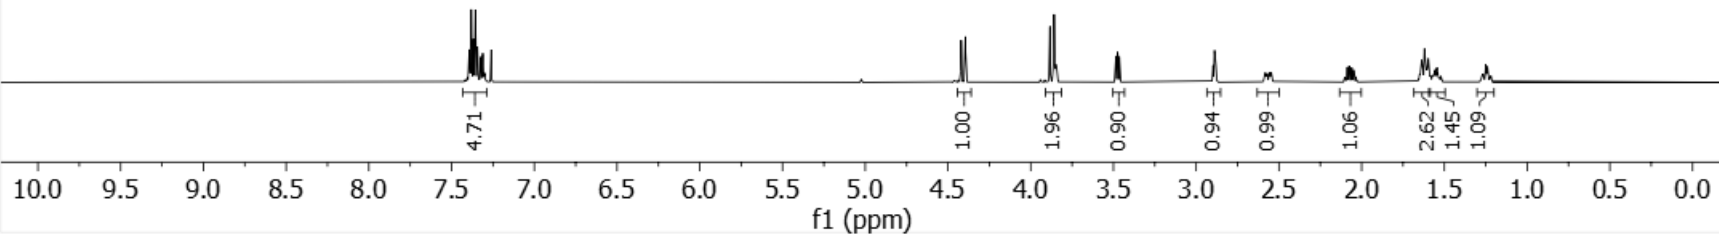

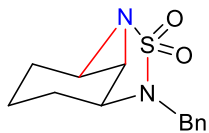

<sup>13</sup>C NMR of **7w**, 150 MHz, CDCl<sub>3</sub>

134.94  
128.90  
128.70  
128.28

77.16 CDCl<sub>3</sub>

51.16  
47.55  
42.95  
42.62

22.07  
17.61  
14.02

134.94

128.90  
128.70  
128.28

51.16

47.55

42.95  
42.62

136 135 134 133 132 131 130 129 128 127

54 52 50 48 46 44 42 40

230 220 210 200 190 180 170 160 150 140 130 120 110 100 90 80 70 60 50 40 30 20 10 0 -10  
f1 (ppm)

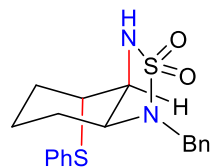

$^1\text{H}$  NMR of **8w**, 600 MHz,  $\text{CDCl}_3$

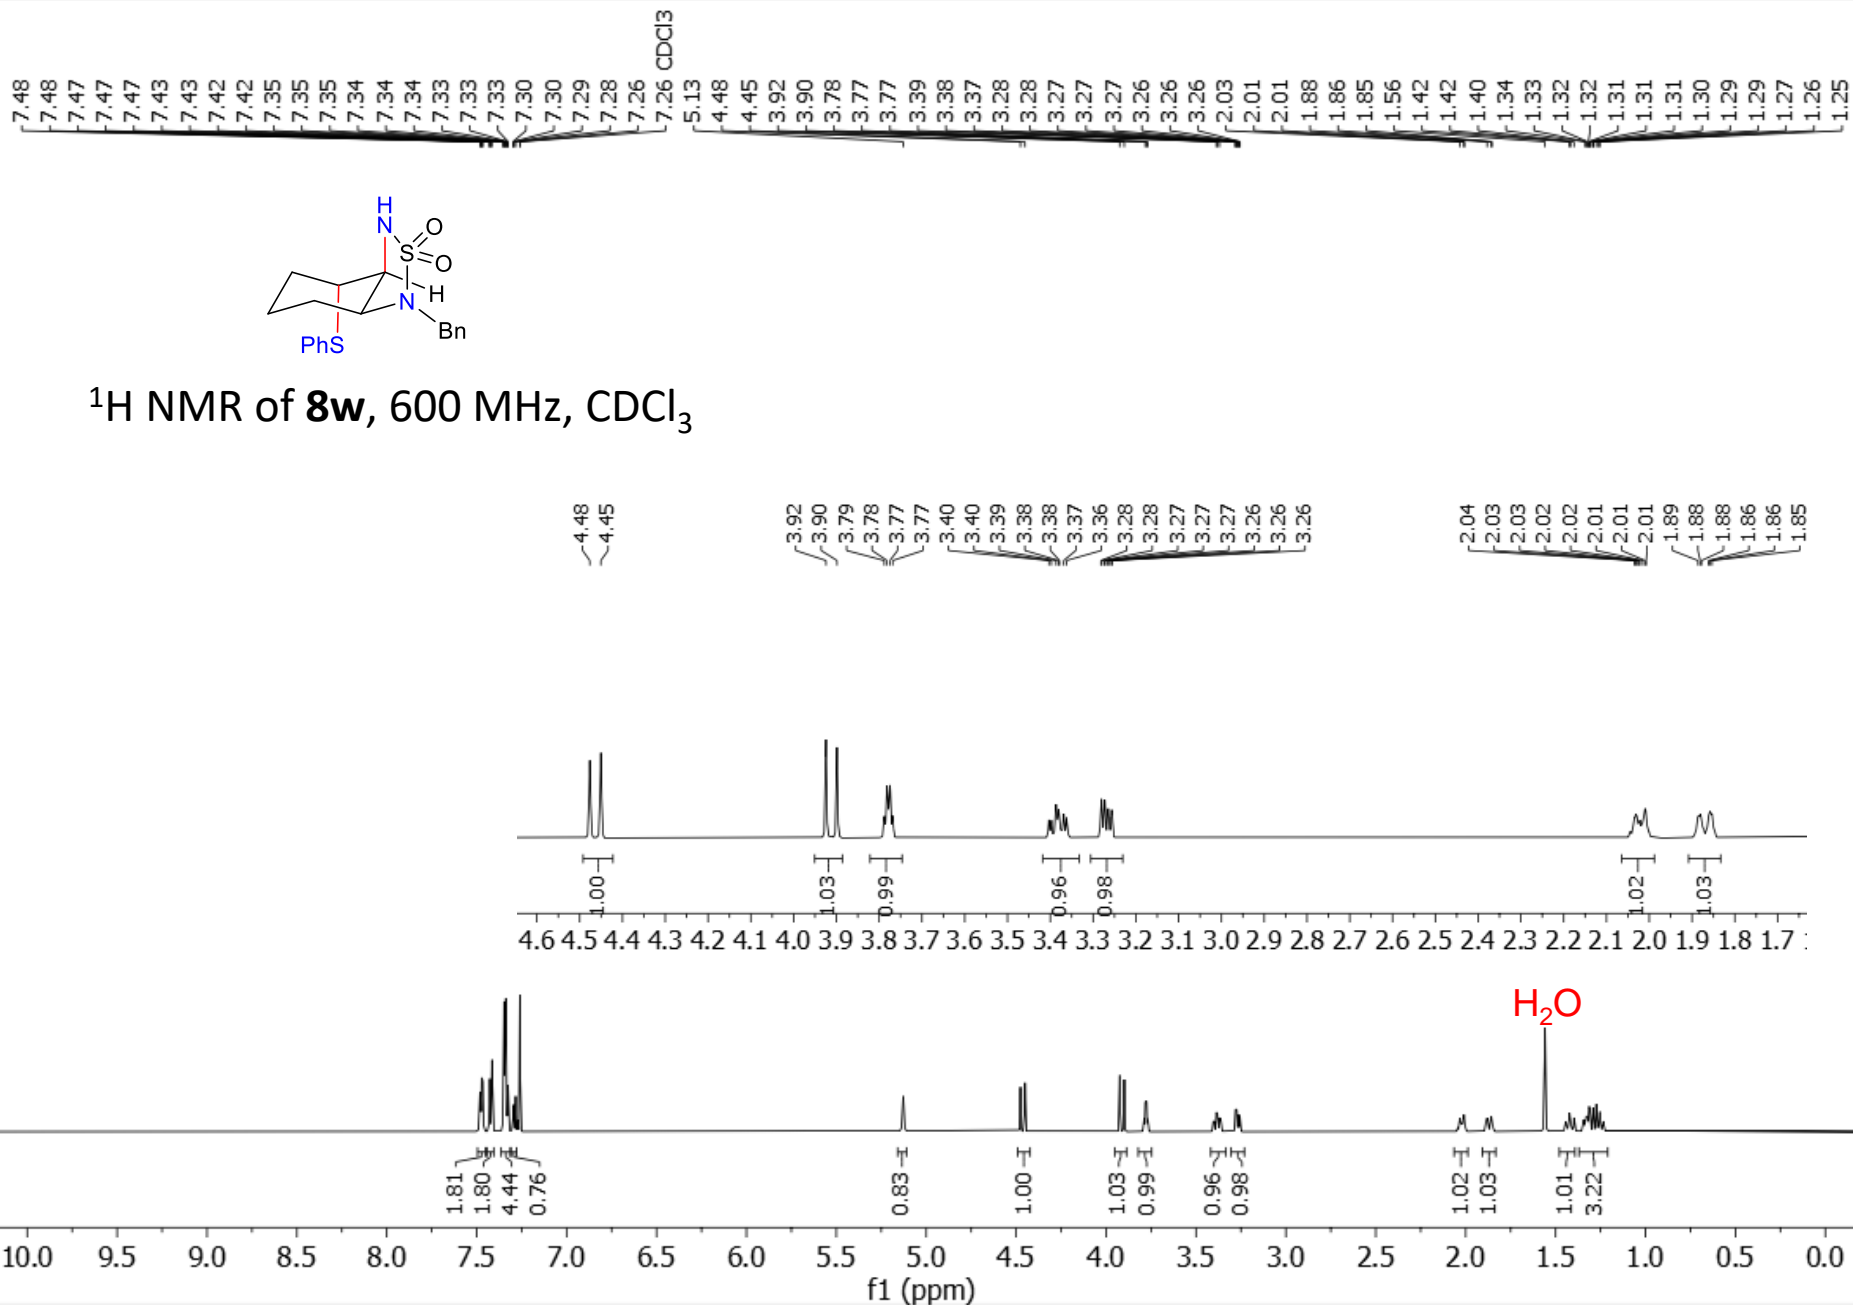

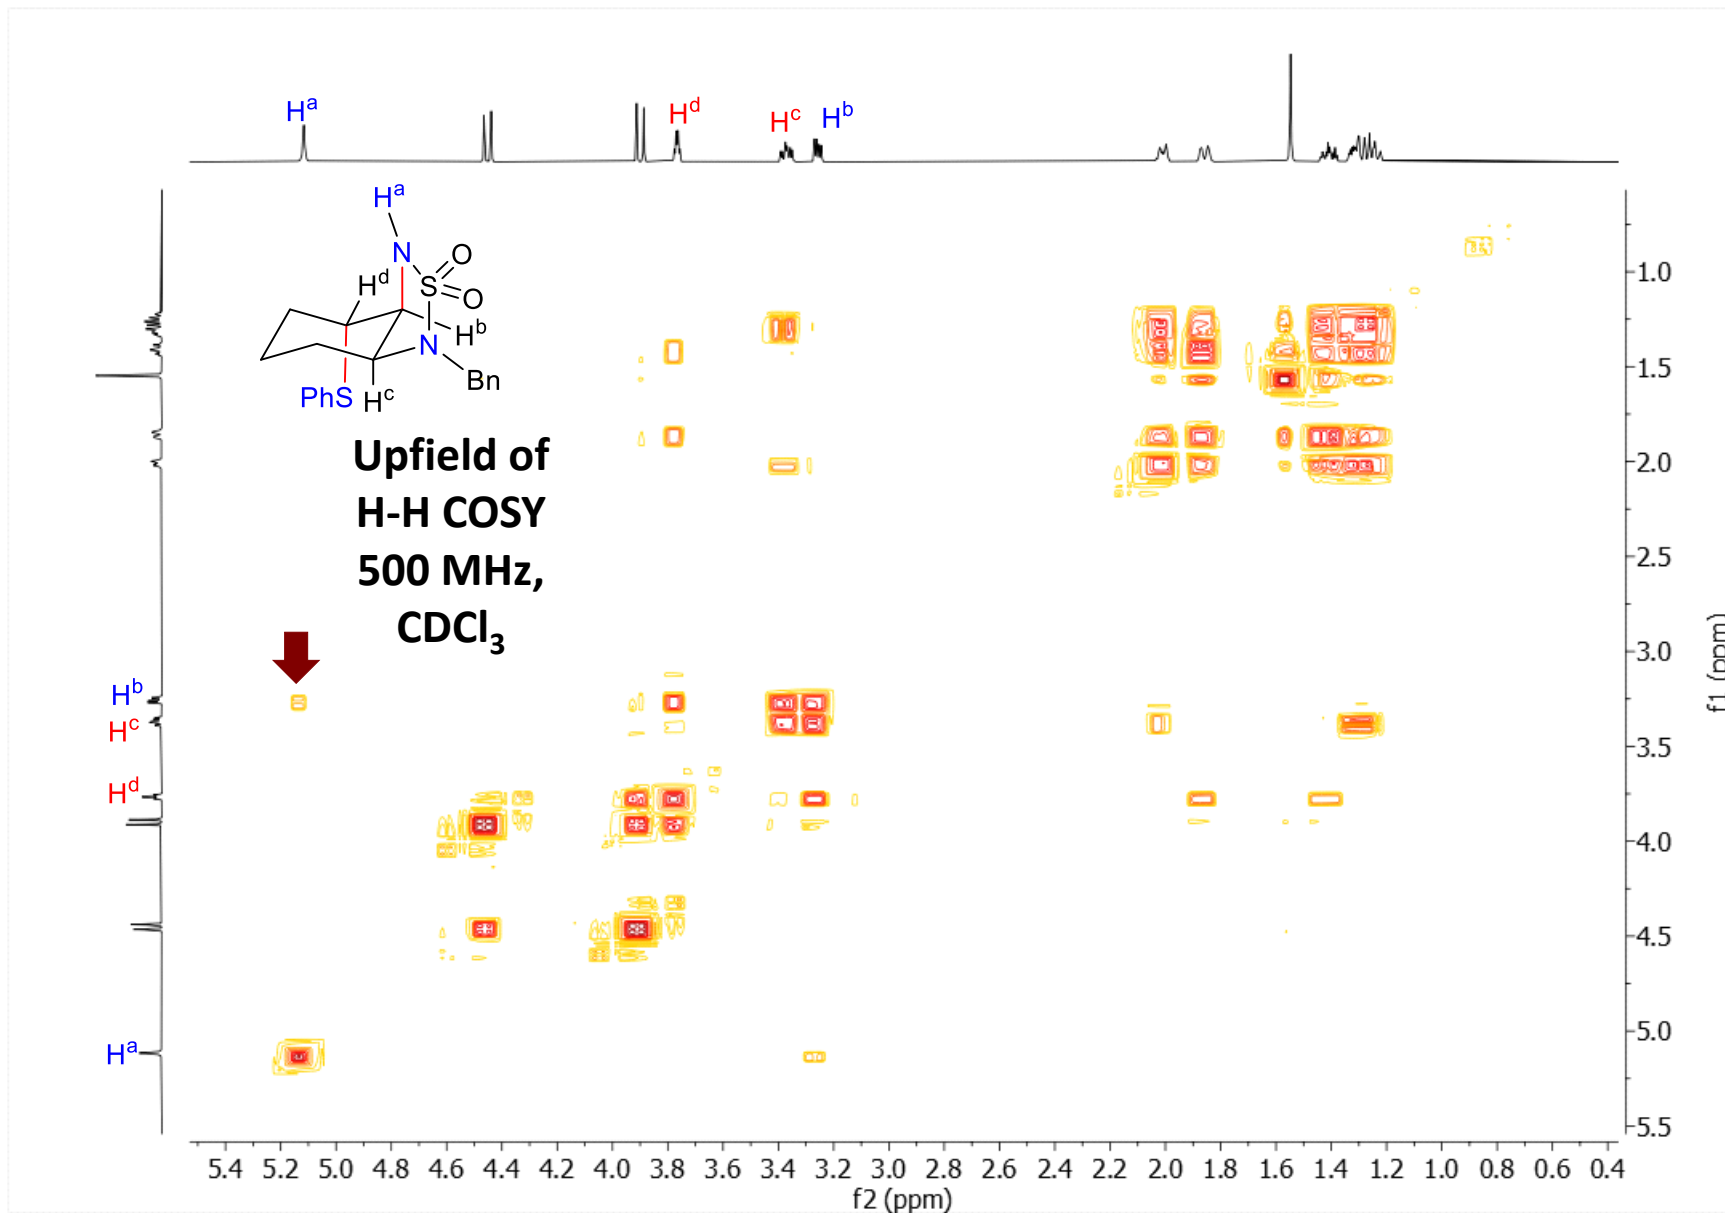

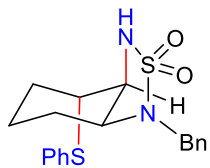

<sup>13</sup>C NMR of **8w**, 125 MHz, CDCl<sub>3</sub>

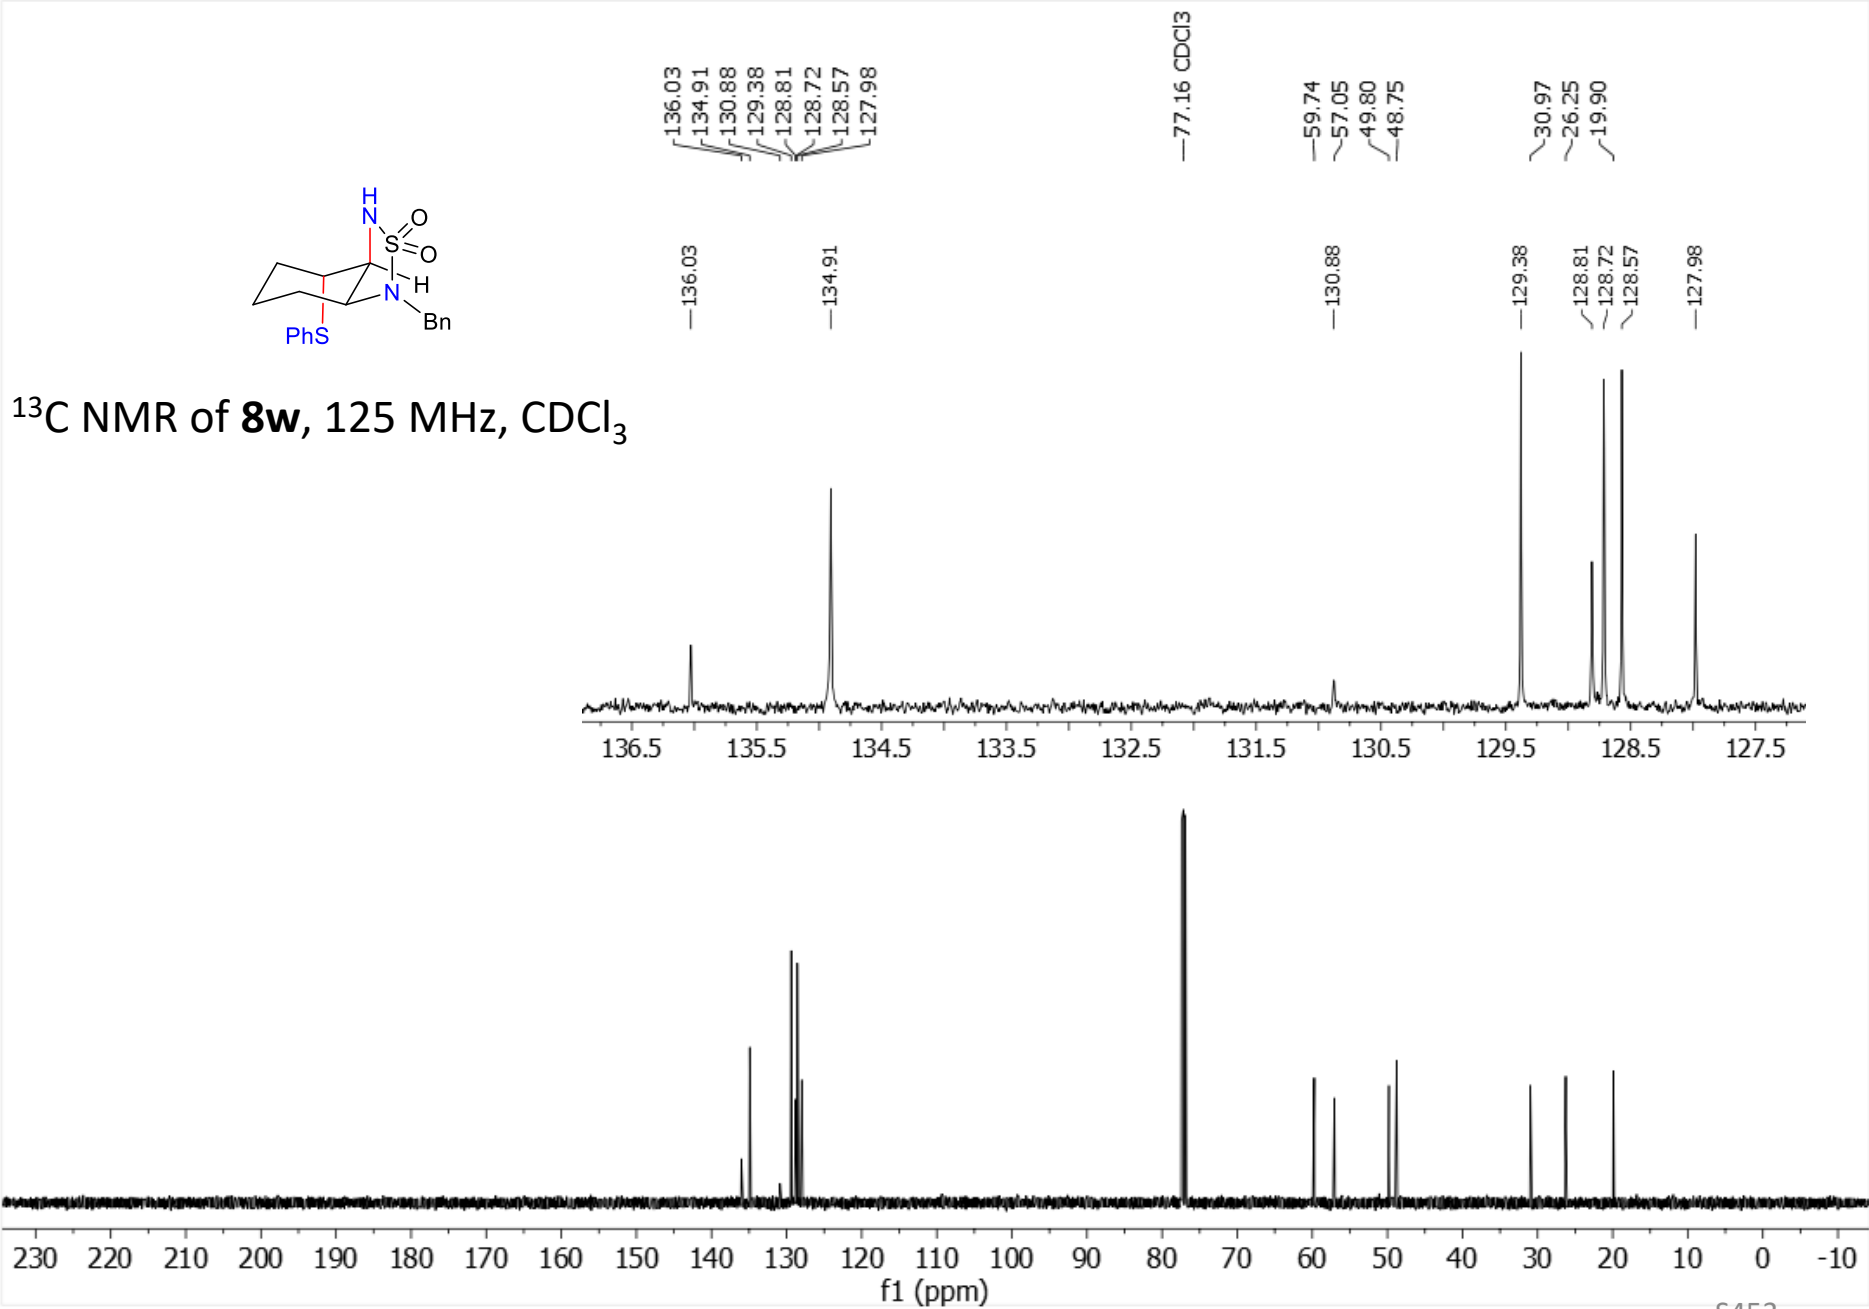

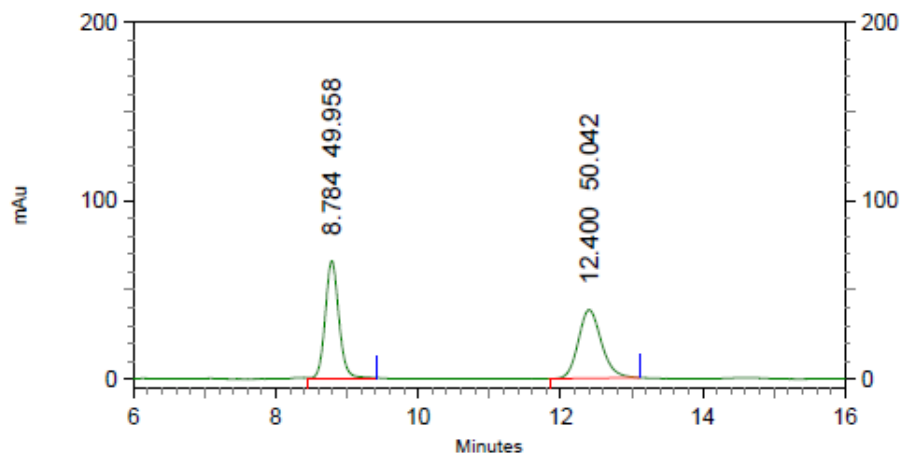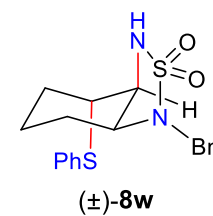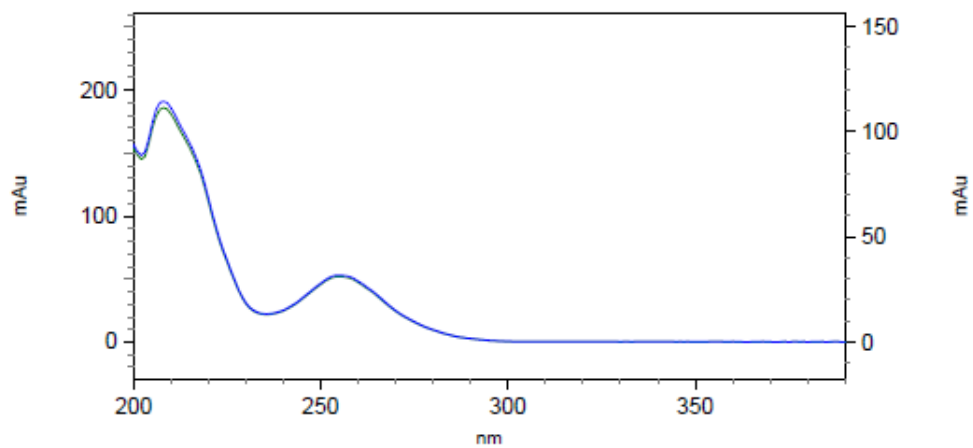

5: 225 nm, 4 nm

Results

| Name | Retention Time | Area Percent | Pk # |
|------|----------------|--------------|------|
|      | 8.784          | 49.958       | 1    |
|      | 12.400         | 50.042       | 2    |

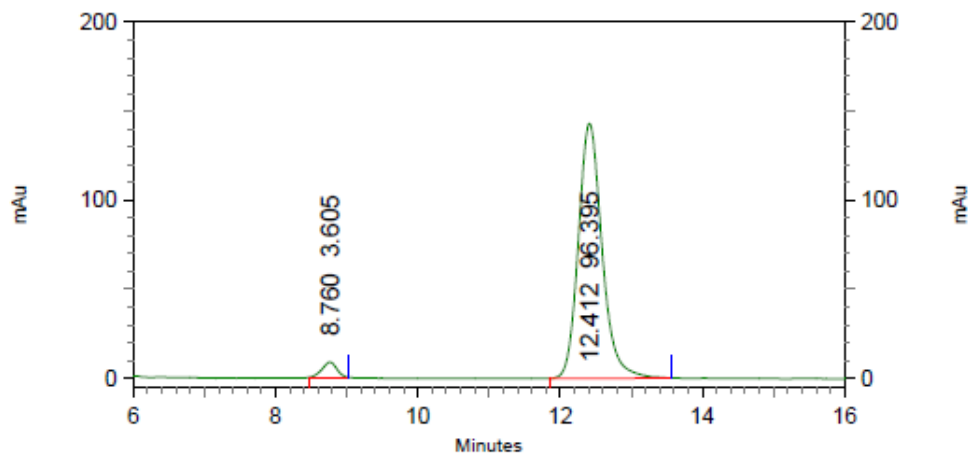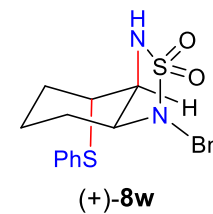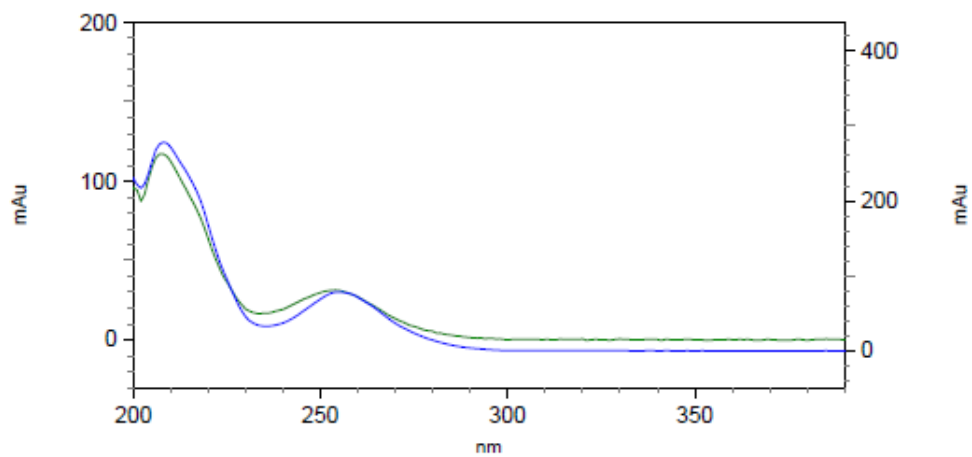

5: 225 nm, 4 nm

Results

| Name | Retention Time | Area Percent | Pk # |
|------|----------------|--------------|------|
|      | 8.760          | 3.605        | 1    |
|      | 12.412         | 96.395       | 2    |



CHCl<sub>3</sub>

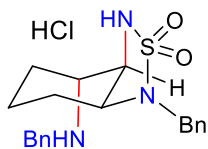

<sup>1</sup>H NMR of **9w**, 600 MHz, CDCl<sub>3</sub>

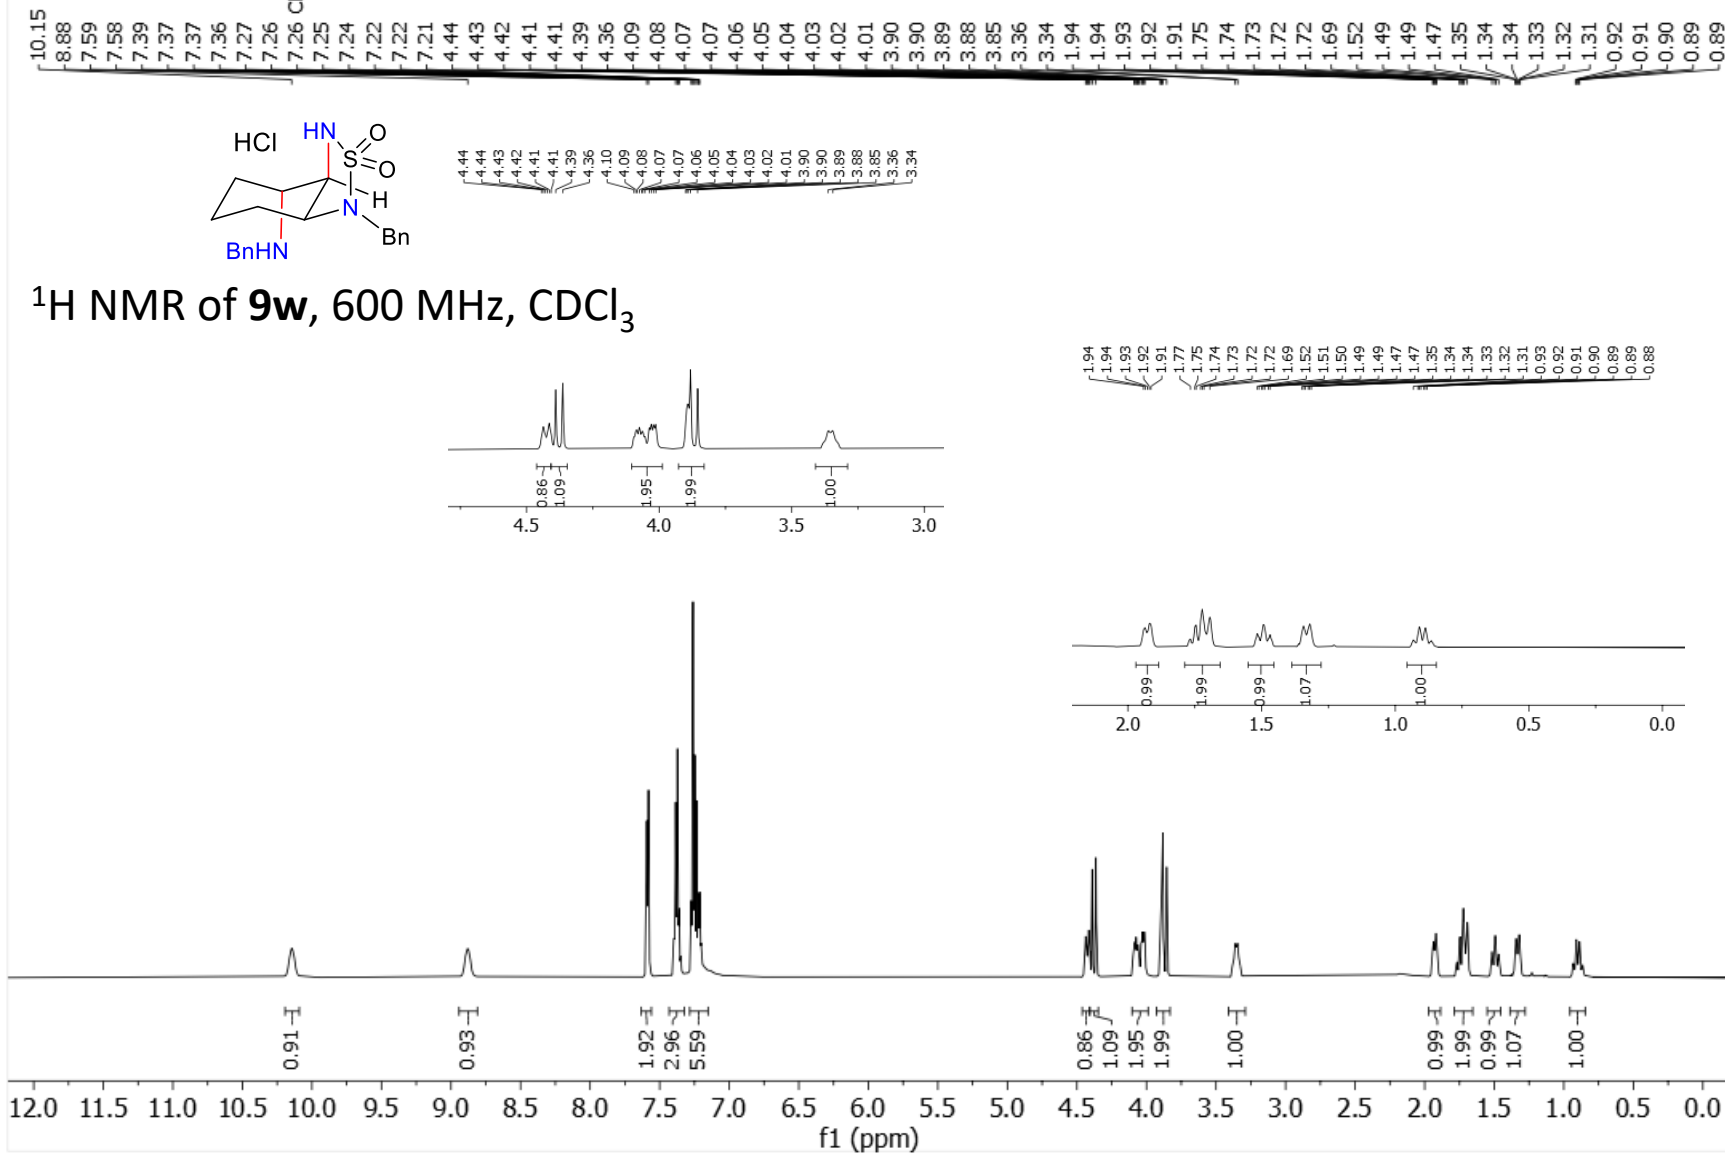

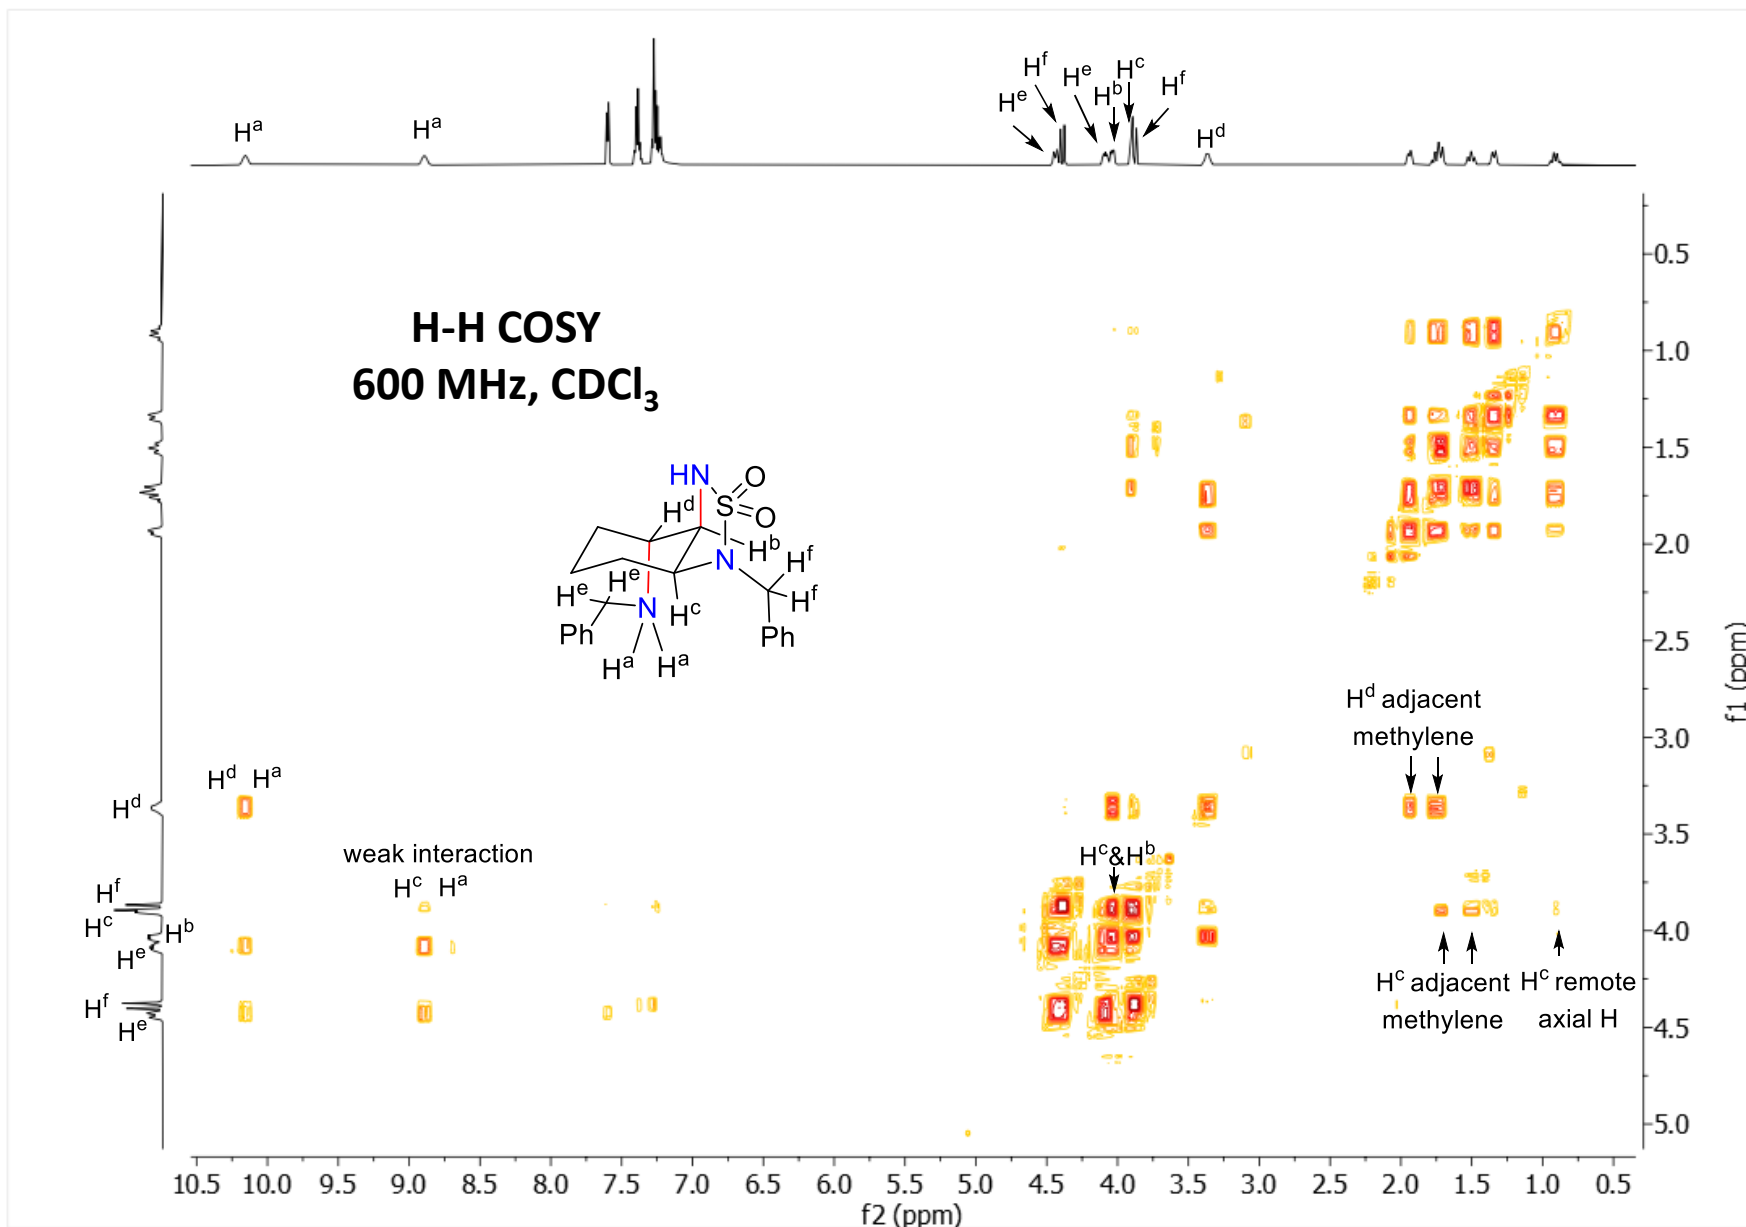

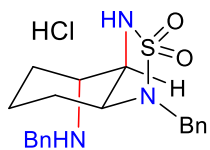

$^{13}\text{C}$  NMR of **9w**,  
150 MHz,  $\text{CDCl}_3$

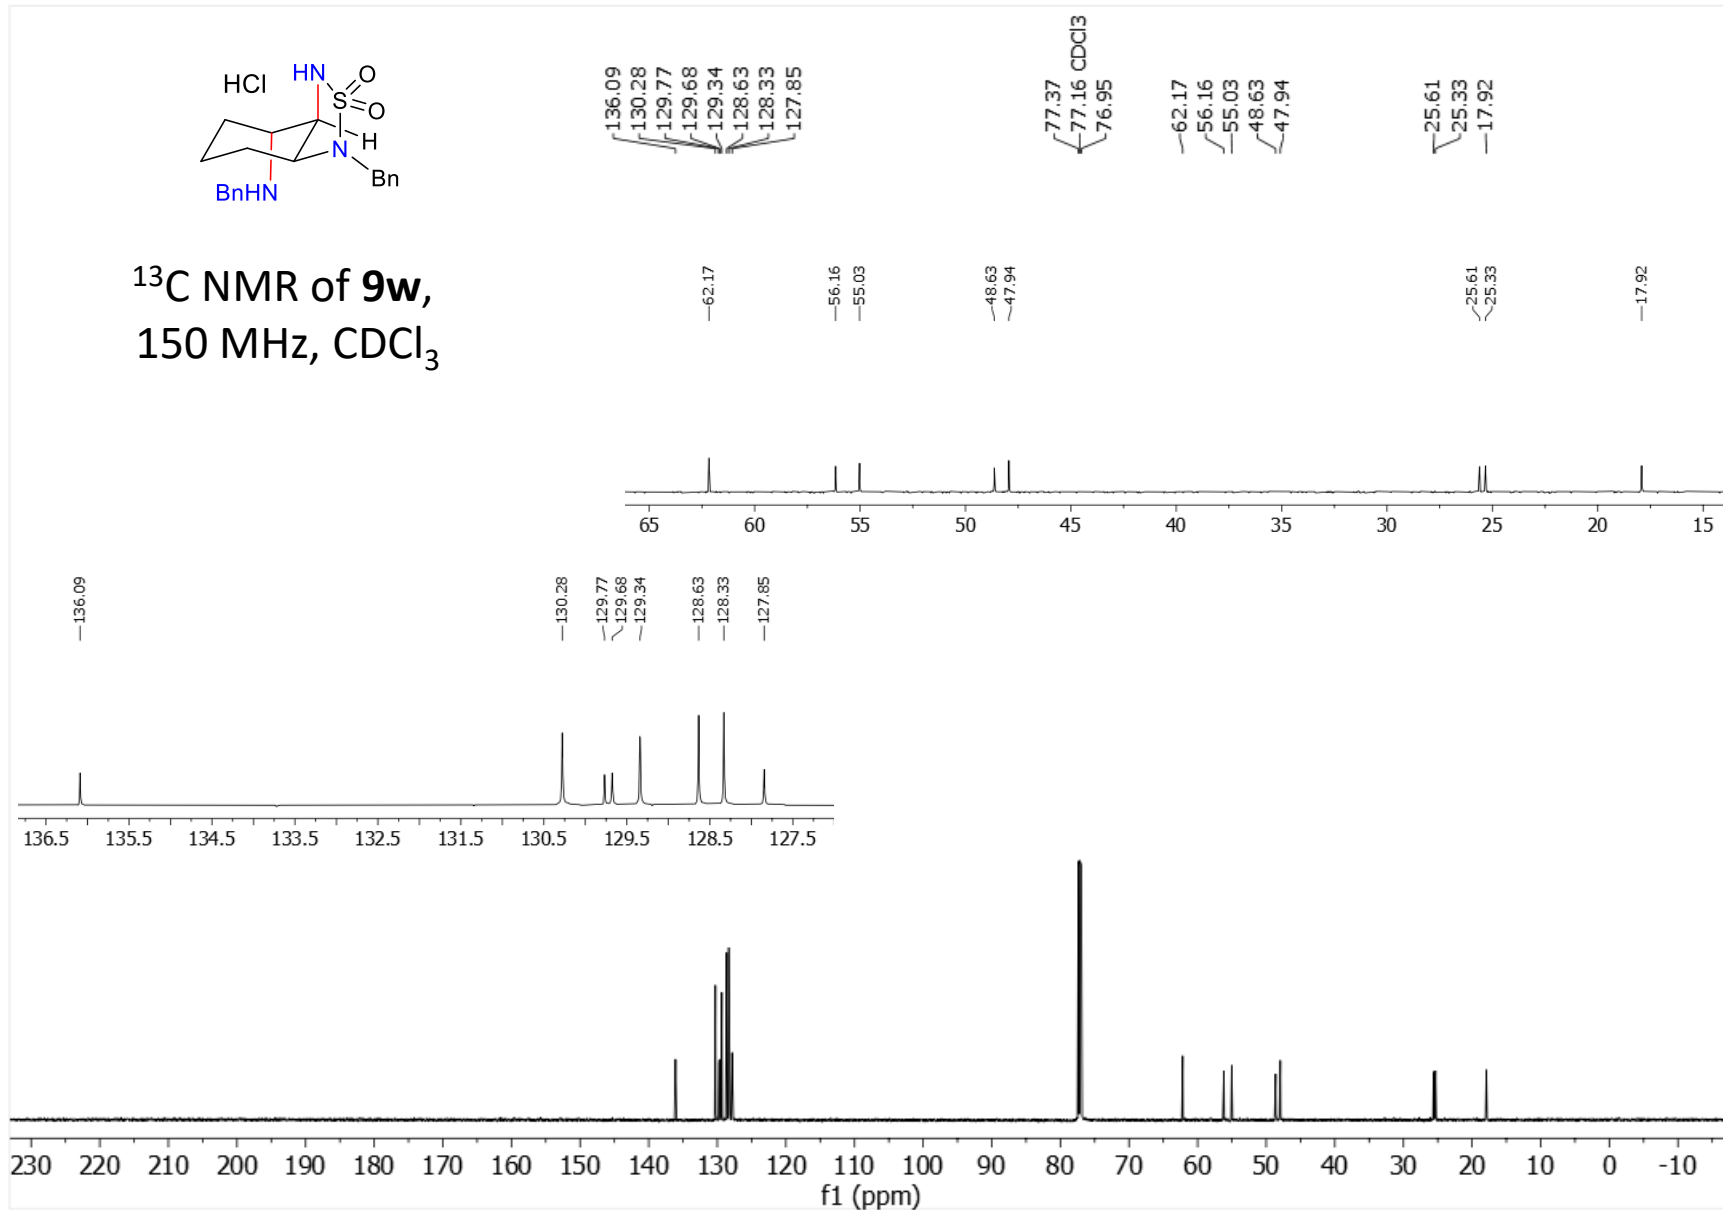

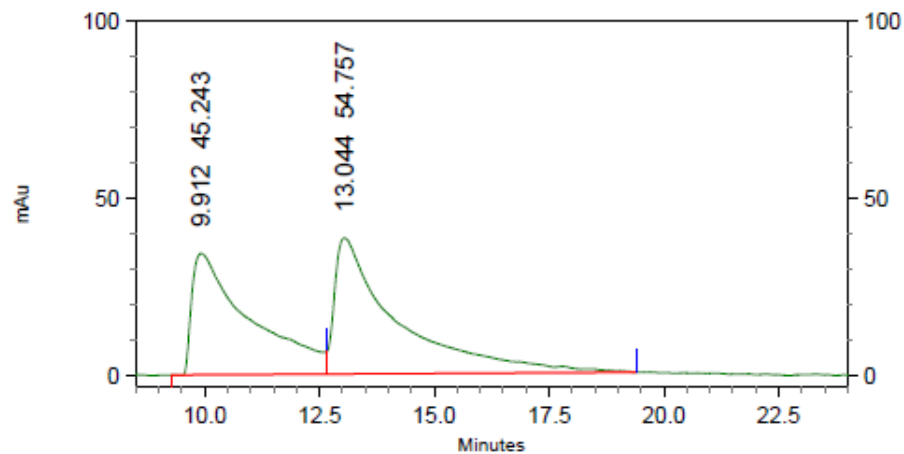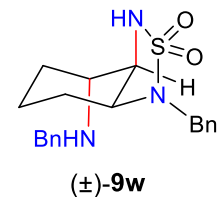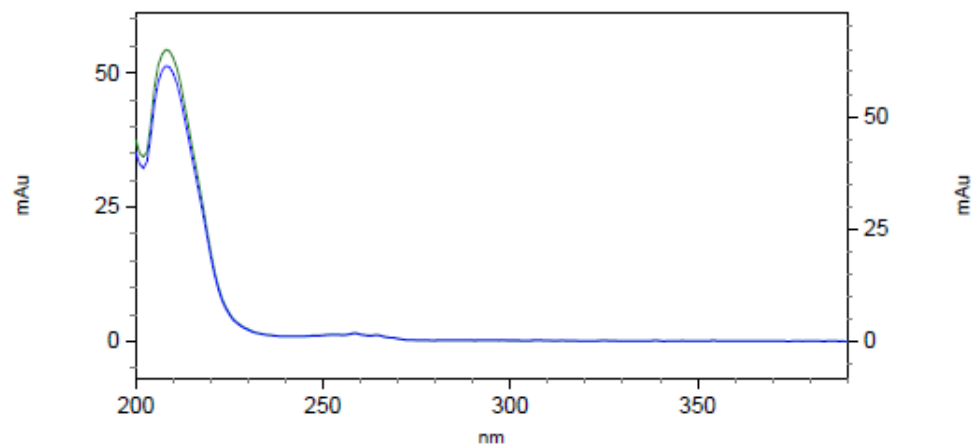

5: 206 nm, 4 nm

Results

| Name | Retention Time | Area Percent | Pk # |
|------|----------------|--------------|------|
|      | 9.912          | 45.243       | 1    |
|      | 13.044         | 54.757       | 2    |

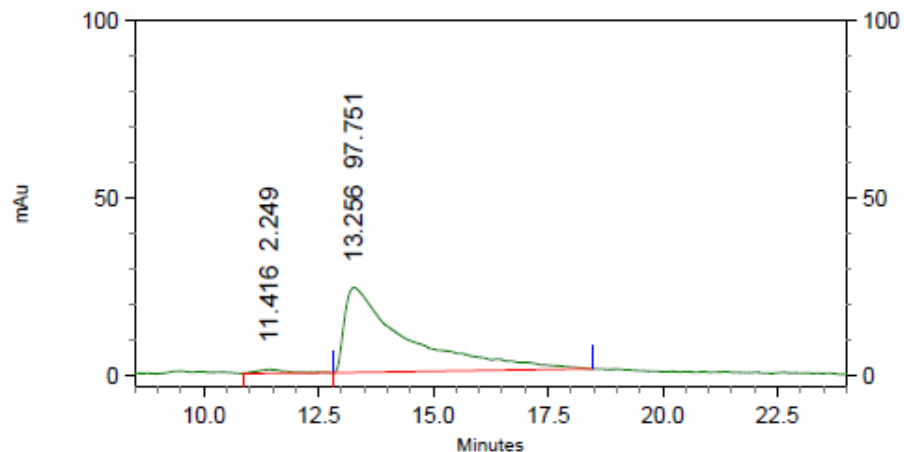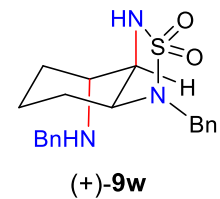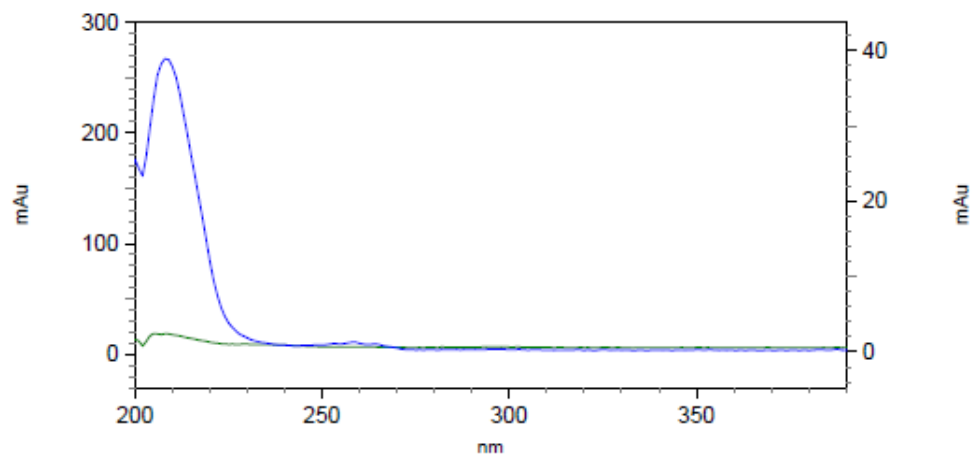

5: 206 nm, 4 nm  
Results

| Name | Retention Time | Area Percent | Pk # |
|------|----------------|--------------|------|
|      | 11.416         | 2.249        | 1    |
|      | 13.256         | 97.751       | 2    |

<sup>1</sup>H NMR of **10w**,  
600 MHz, CDCl<sub>3</sub>

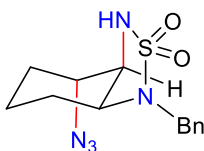

CHCl<sub>3</sub>

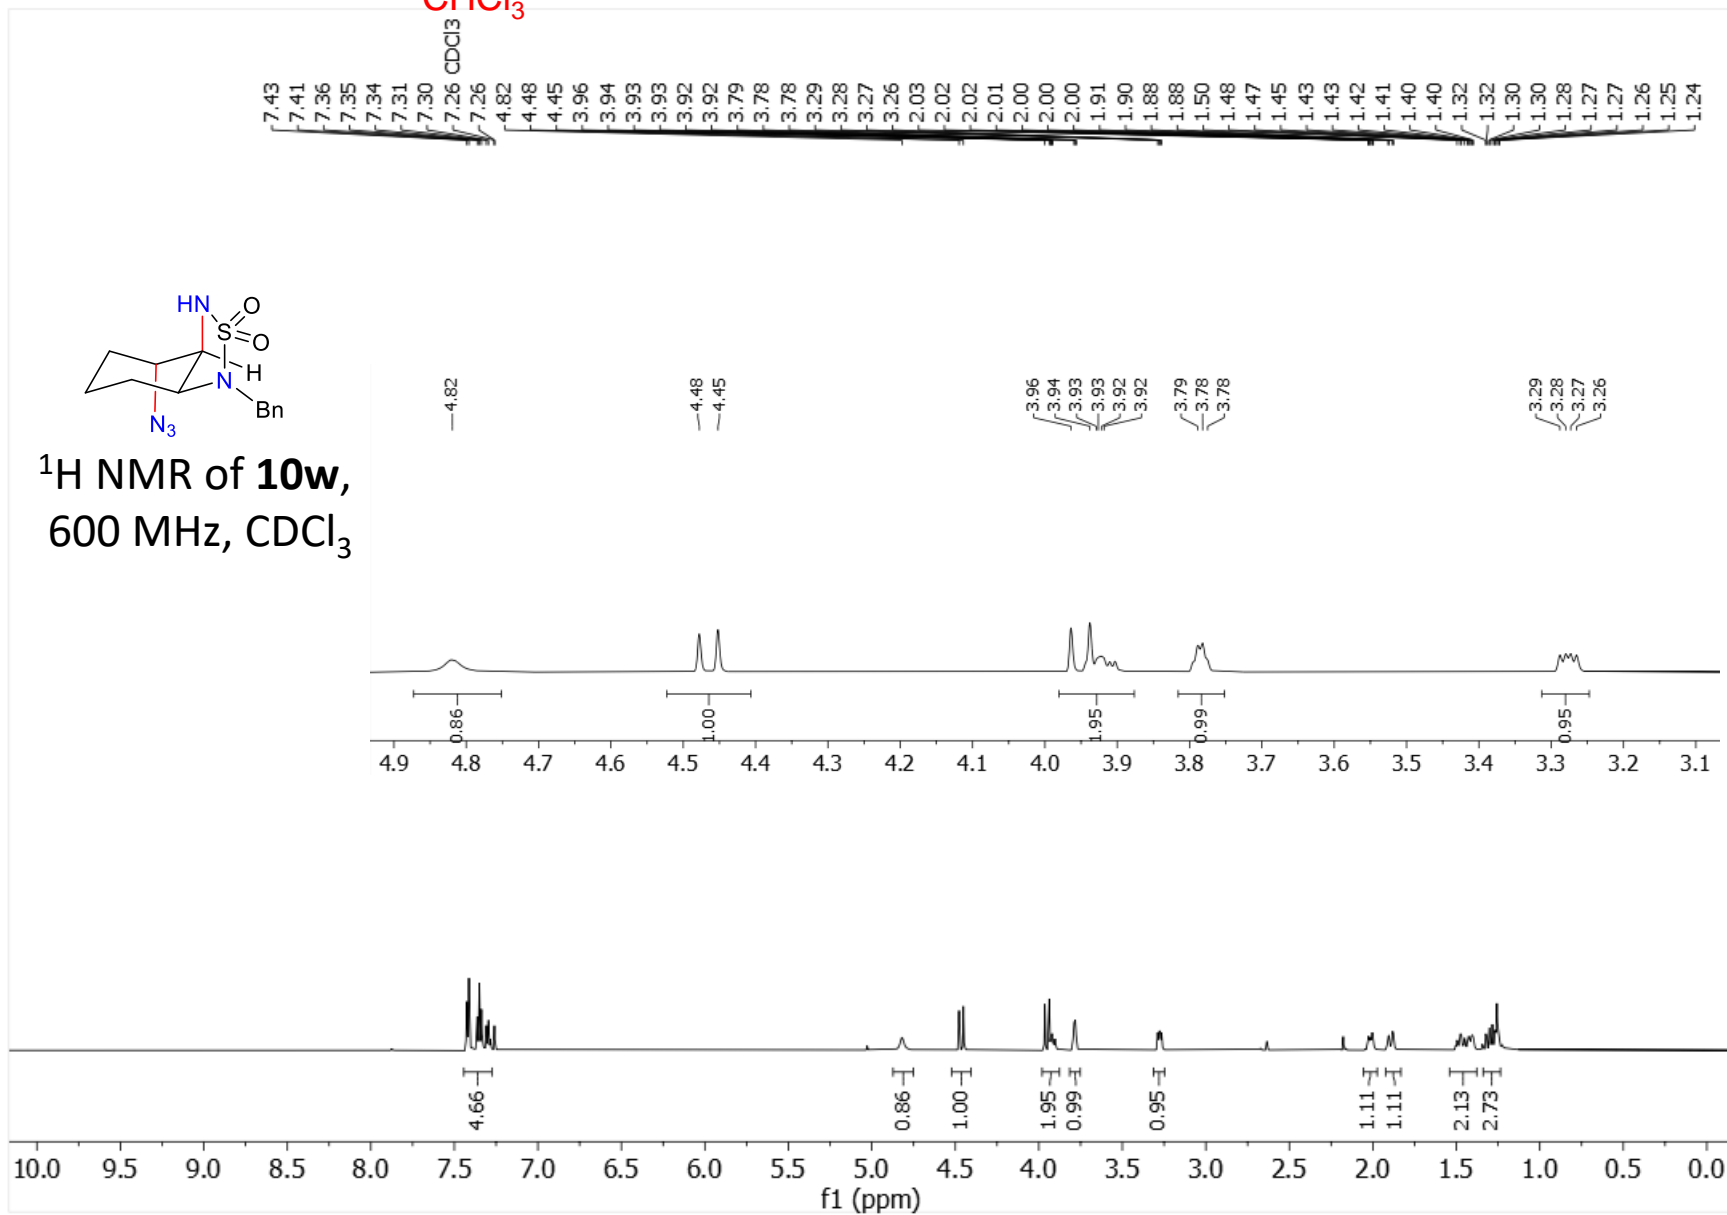

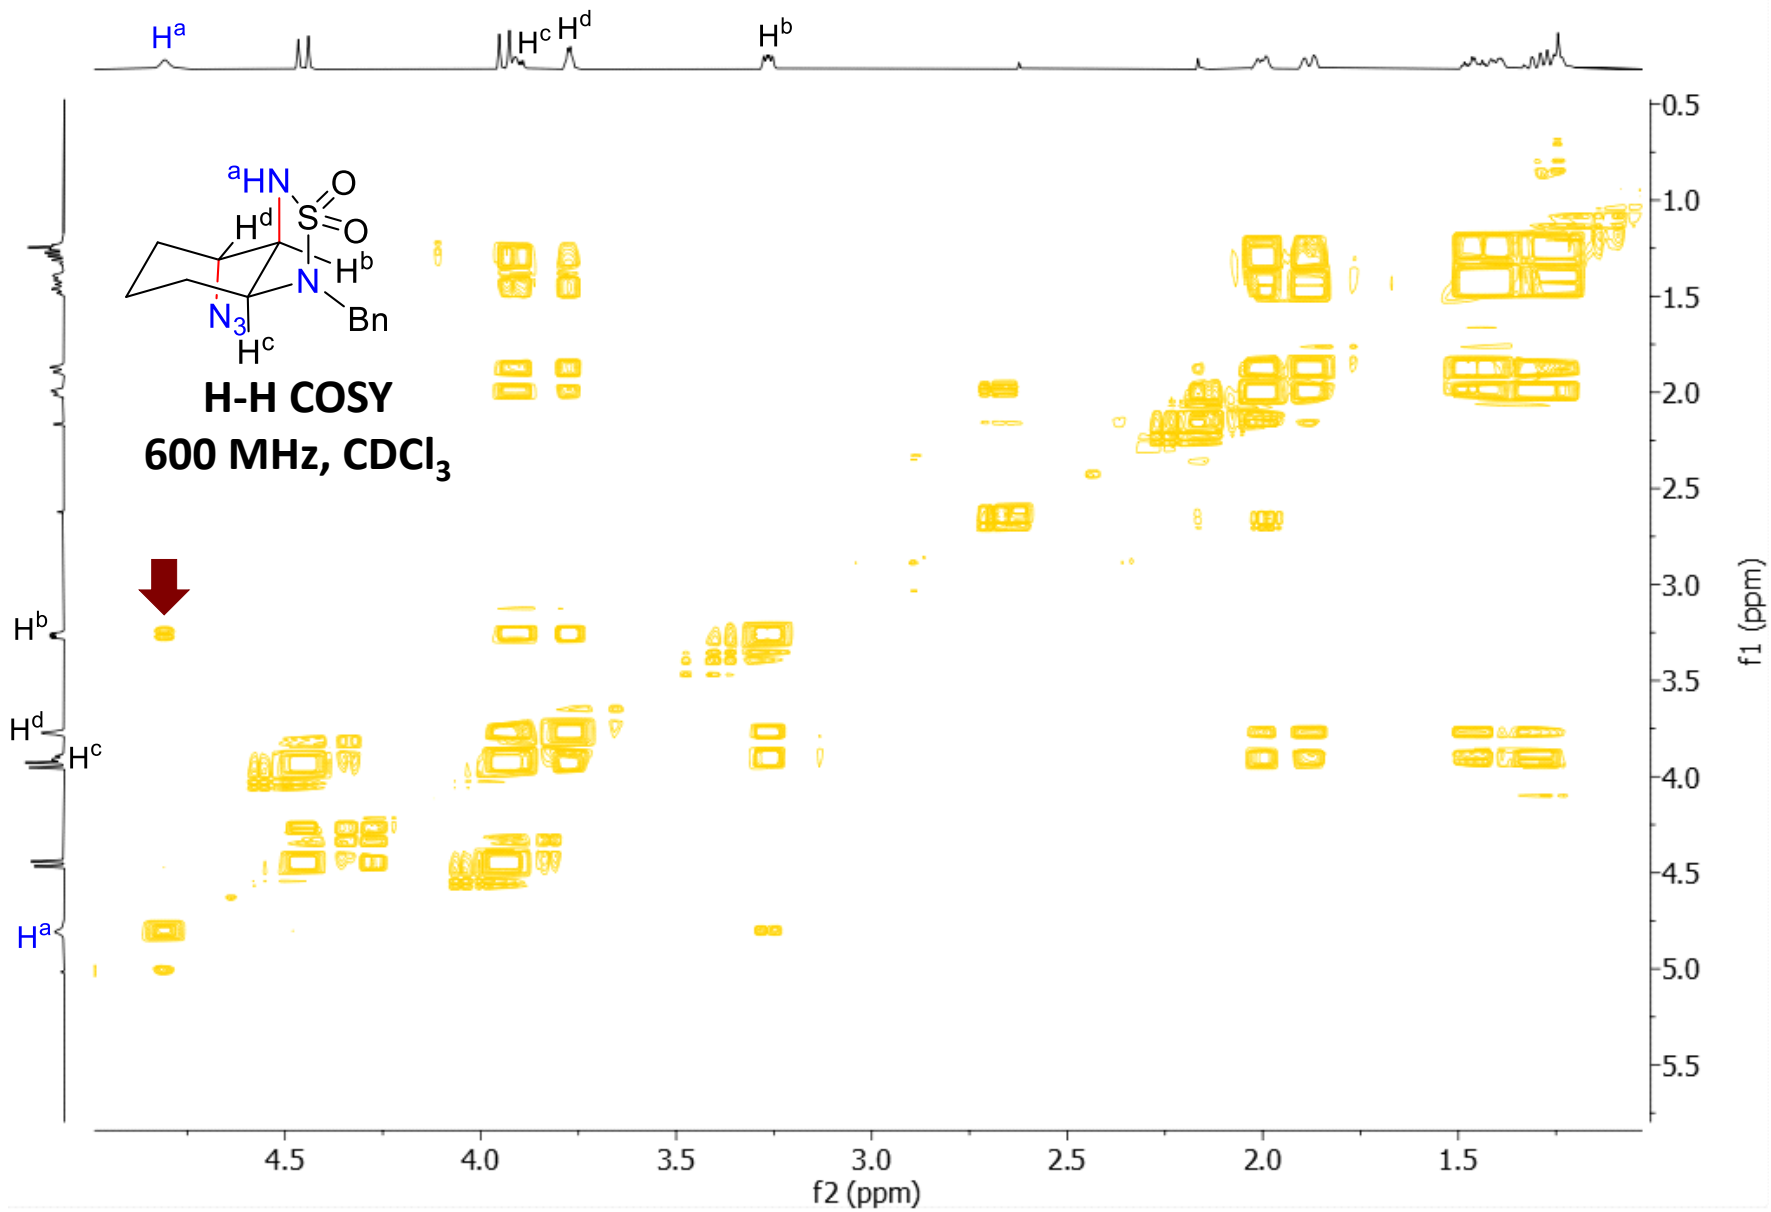

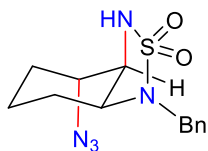

<sup>13</sup>C NMR of **10w**,  
150 MHz, CDCl<sub>3</sub>

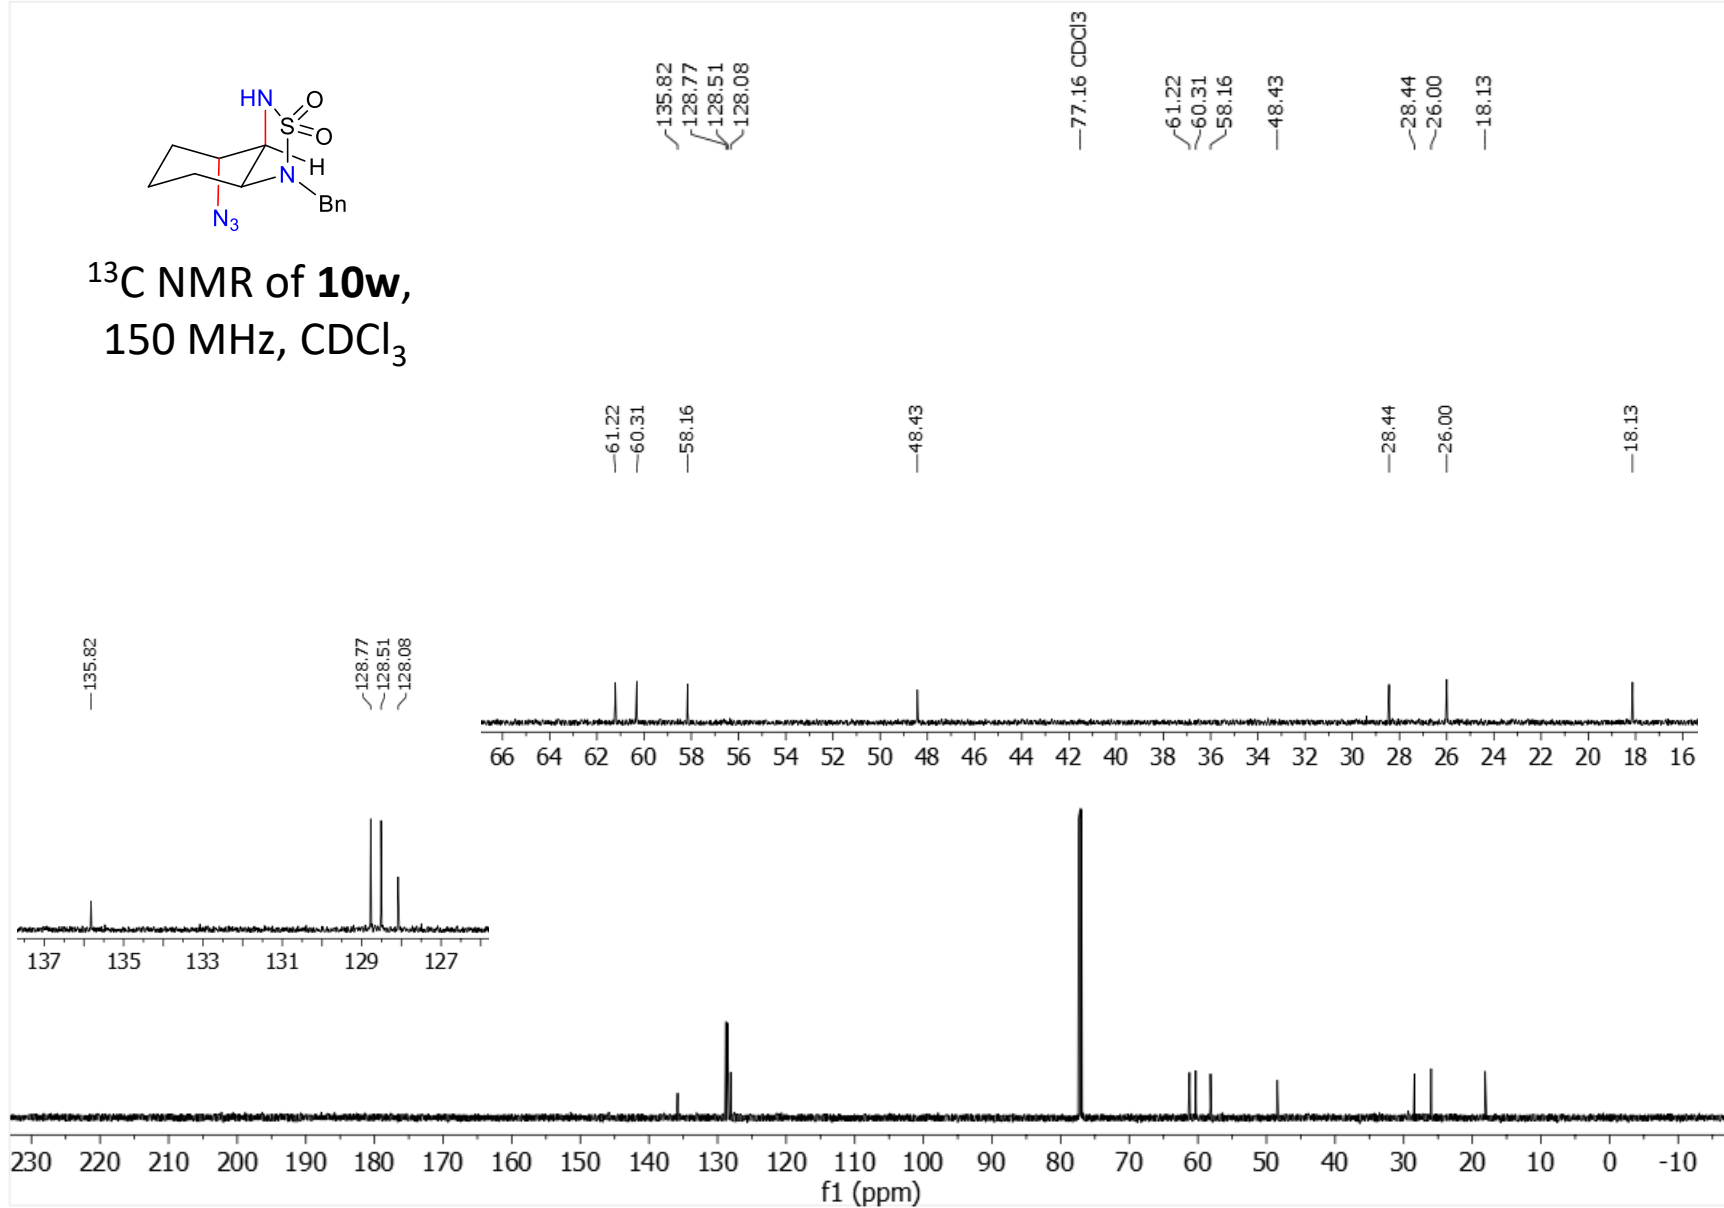



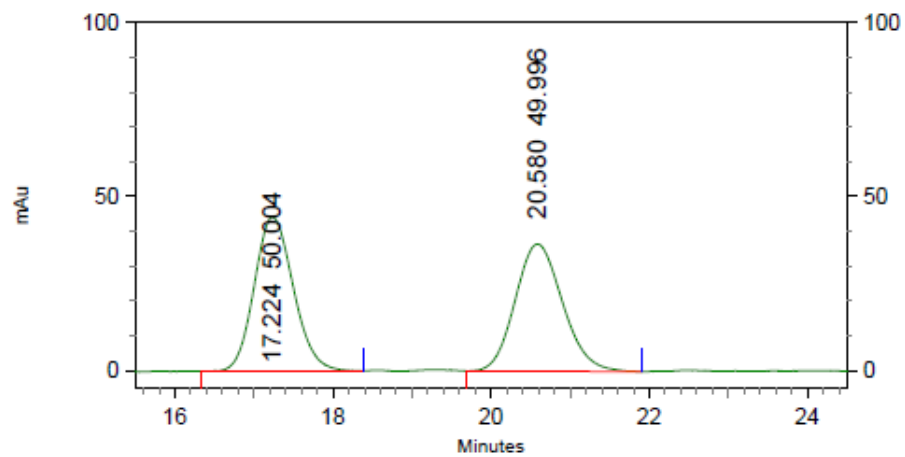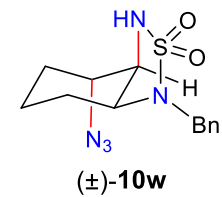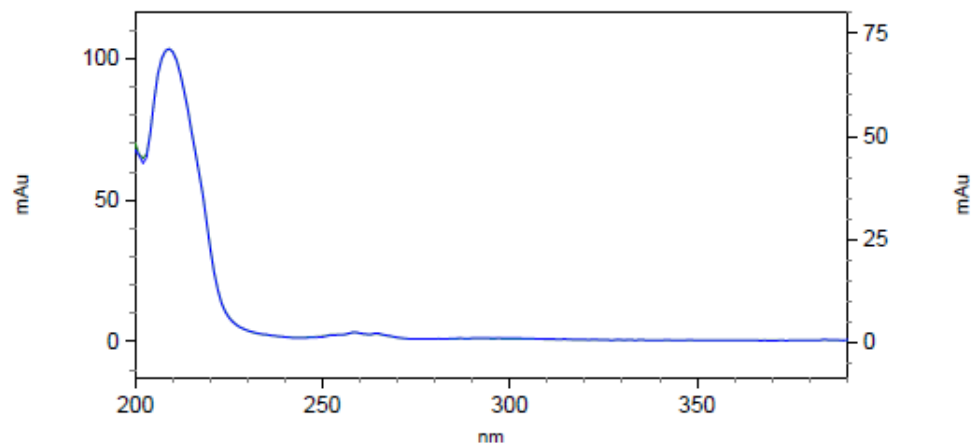

5: 206 nm, 4 nm

Results

| Name | Retention Time | Area Percent | Pk # |
|------|----------------|--------------|------|
|      | 17.224         | 50.004       | 1    |
|      | 20.580         | 49.996       | 2    |

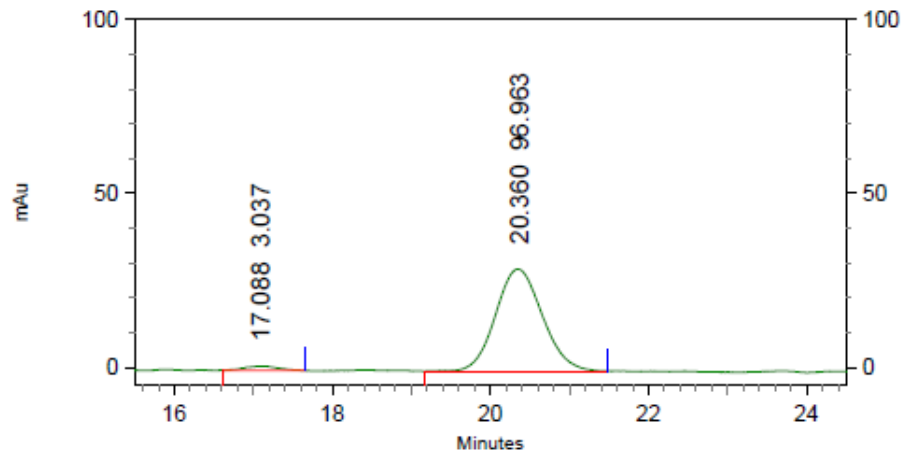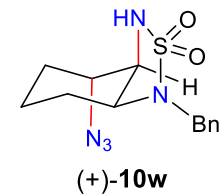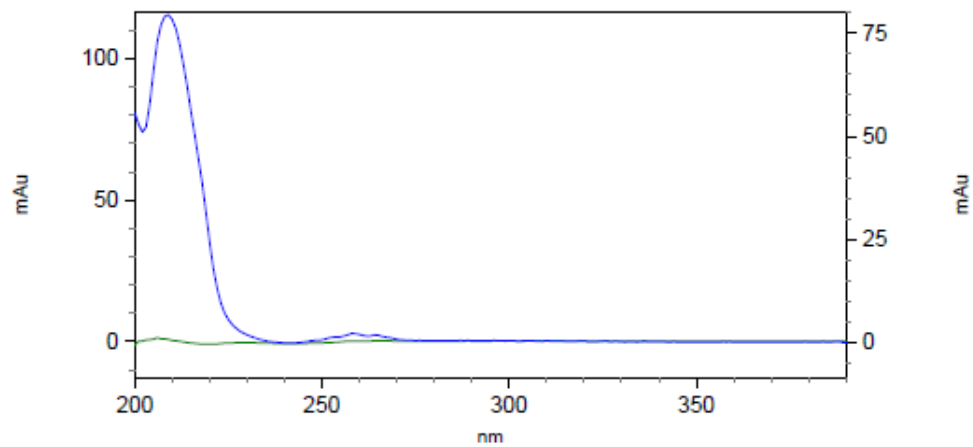

5: 206 nm, 4 nm

Results

| Name | Retention Time | Area Percent | Pk # |
|------|----------------|--------------|------|
|      | 17.088         | 3.037        | 1    |
|      | 20.360         | 96.963       | 2    |
